# Supplementary material for: The fluoride permeation pathway and anion recognition in Fluc family fluoride channels
Source: eLife. 2021 Jul 12;10:e69482. doi: 10.7554/eLife.69482 (PMC8315801; doi:10.7554/eLife.69482)
Supplement: Figure 1—source data 1. [file elife-69482-fig1-data1.xlsx]

## Sheet: Sheet1
	0	-686.523					0	-59.6924
Ec2-I48C MTSES	0.05	-686.645				Ec2-WT MTSES	0.05	-60.6689
	0.1	-685.974					0.1	-60.3027			% decrease in current
	0.15	-688.049					0.15	-59.8755			Ec2-WT	Ec2-I48C
	0.2	-685.974					0.2	-61.4014			-2	60
	0.25	-687.927					0.25	-60.2417			-7	55
	0.3	-687.134					0.3	-60.5469			1	63
	0.35	-686.768					0.35	-60.1807			1.5	60
	0.4	-685.608					0.4	-59.1431			3	44
	0.45	-685.486					0.45	-60.3027
	0.5	-688.171					0.5	-60.73		summary data bar graph replicates
	0.55	-687.622					0.55	-58.2275
	0.6	-686.89					0.6	-59.021
	0.65	-687.805					0.65	-61.7065
	0.7	-687.378					0.7	-60.3027
	0.75	-688.11					0.75	-59.9365
	0.8	-688.904					0.8	-59.2041
	0.85	-692.2					0.85	-60.1196
	0.9	-690.735					0.9	-61.2793
	0.95	-687.317					0.95	-59.9365
	1	-687.927					1	-59.5703
	1.05	-687.195					1.05	-59.6313
	1.1	-687.866					1.1	-59.6313
	1.15	-687.256					1.15	-58.96
	1.2	-688.293					1.2	-58.3496
	1.25	-687.195					1.25	-59.2041
	1.3	-687.439					1.3	-60.1807
	1.35	-686.035					1.35	-59.9976
	1.4	-686.829					1.4	-60.852
	1.45	-686.951					1.45	-61.5234
	1.5	-687.378					1.5	-60.9741
	1.55	-688.66					1.55	-60.4248
	1.6	-687.012					1.6	-59.6924
	1.65	-687.683					1.65	-60.3638
	1.7	-687.683					1.7	-61.7065
	1.75	-687.988					1.75	-62.2559
	1.8	-687.256					1.8	-61.8896
	1.85	-688.049					1.85	-60.9741
	1.9	-687.988					1.9	-59.8755
	1.95	-688.538					1.95	-61.4624
	2	-687.744					2	-62.5
	2.05	-687.256					2.05	-61.9507
	2.1	-687.5					2.1	-62.3779
	2.15	-689.575					2.15	-62.3169
	2.2	-689.026					2.2	-61.2183
	2.25	-689.453					2.25	-62.7441
	2.3	-689.209					2.3	-62.0117
	2.35	-688.415					2.35	-61.2183
	2.4	-689.636					2.4	-62.3779
	2.45	-690.491					2.45	-62.8662
	2.5	-691.528					2.5	-61.5845
	2.55	-691.345					2.55	-62.9883
	2.6	-689.88					2.6	-61.9507
	2.65	-690.247					2.65	-62.5
	2.7	-690.674					2.7	-63.0493
	2.75	-690.308					2.75	-61.5234
	2.8	-690.796					2.8	-61.6455
	2.85	-690.796					2.85	-62.8052
	2.9	-688.843					2.9	-63.1103
	2.95	-685.913					2.95	-63.5376
	3	-688.965					3	-62.3779
	3.05	-691.772					3.05	-62.3169
	3.1	-688.843					3.1	-62.0728
	3.15	-691.833					3.15	-63.5376
	3.2	-661.682					3.2	-62.6221
	3.25	-688.293					3.25	-59.4482
	3.3	-686.462					3.3	-61.2183
	3.35	-691.833					3.35	-63.2935
	3.4	-690.735					3.4	-61.5845
	3.45	-690.124					3.45	-62.1338
	3.5	-691.894					3.5	-61.5845
	3.55	-689.758					3.55	-62.439
	3.6	-689.392					3.6	-61.0962
	3.65	-687.927					3.65	-60.1196
	3.7	-683.35					3.7	-62.0117
	3.75	-687.927					3.75	-61.5845
	3.8	-687.988					3.8	-62.8662
	3.85	-688.965					3.85	-61.0962
	3.9	-689.331					3.9	-61.9507
	3.95	-691.162					3.95	-63.6597
	4	-688.782					4	-62.5
	4.05	-688.66					4.05	-63.6597
	4.1	-685.425					4.1	-62.1338
	4.15	-689.575					4.15	-63.7207
	4.2	-690.247					4.2	-62.3779
	4.25	-687.256					4.25	-62.8052
	4.3	-684.265					4.3	-62.1948
	4.35	-683.472					4.35	-62.1948
	4.4	-677.612					4.4	-62.5
	4.45	-675.232					4.45	-62.1948
	4.5	-671.204					4.5	-62.5
	4.55	-661.682					4.55	-61.8896
	4.6	-655.762					4.6	-61.4014
	4.65	-658.081					4.65	-62.1338
	4.7	-663.391					4.7	-62.1948
	4.75	-676.269					4.75	-61.3403
	4.8	-678.223					4.8	-59.9365
	4.85	-679.016					4.85	-59.6924
	4.9	-686.645					4.9	-60.5469
	4.95	-1032.23					4.95	-60.0586
	5	-683.35					5	-61.0962
	5.05	-682.373					5.05	-59.9365
	5.1	-651.062					5.1	-61.4014
	5.15	-608.459					5.15	-60.3027
	5.2	-658.447					5.2	-58.4106
	5.25	-698.425					5.25	-59.4482
	5.3	-694.336					5.3	-61.8286
	5.35	-693.176					5.35	-63.7817
	5.4	-692.81					5.4	-54.7485
	5.45	-694.58					5.45	-52.4292
	5.5	-693.054					5.5	-52.1851
	5.55	-778.931					5.55	-51.1475
	5.6	-190.979					5.6	-50.5371
	5.65	-579.468					5.65	-53.4668
	5.7	-536.499					5.7	-53.2227
	5.75	-558.35					5.75	-57.0068
	5.8	-698.303					5.8	-59.6924
	5.85	-691.528					5.85	-60.1807
	5.9	-687.927					5.9	-58.4717
	5.95	-692.078					5.95	-61.6455
	6	-1087.16					6	-62.8052
	6.05	-1032.41					6.05	-59.082
	6.1	-667.297					6.1	-53.5889
	6.15	-691.956					6.15	-61.8286
	6.2	-693.542					6.2	-59.5703
	6.25	-691.406					6.25	-67.0166
	6.3	-689.636					6.3	-61.9507
	6.35	-782.898					6.35	-47.3633
	6.4	-278.625					6.4	-49.9268
	6.45	-551.636					6.45	-39.7949
	6.5	-437.134					6.5	-33.8135
	6.55	-709.656					6.55	-41.626
	6.6	-692.261					6.6	-21.4233
	6.65	-692.2					6.65	-25.3906
	6.7	-689.392					6.7	-55.8472
	6.75	-822.754					6.75	-56.7627
	6.8	-906.555					6.8	-59.021
	6.85	-578.918					6.85	-63.1103
	6.9	-744.629					6.9	-63.7817
	6.95	-493.225					6.95	-92.6514
	7	-490.295					7	-875.793
	7.05	-491.699					7.05	-78.125
	7.1	-531.311					7.1	-62.8052
	7.15	103.271					7.15	-80.3223
	7.2	-92.4683					7.2	-49.6216
	7.25	-505.737					7.25	-42.8467
	7.3	-480.041					7.3	-38.4521
	7.35	-477.051					7.35	-33.9966
	7.4	-473.145					7.4	-33.3252
	7.45	-883.423					7.45	-32.6538
	7.5	-958.984					7.5	-18.7378
	7.55	-769.165					7.55	930.054
	7.6	-467.407					7.6	75.9888
	7.65	-481.445					7.65	-47.8516
	7.7	-474.487					7.7	-48.9502
	7.75	-475.525					7.75	-49.4995
	7.8	-537.231					7.8	-49.4995
	7.85	-85.2051					7.85	-258.606
	7.9	-266.846					7.9	-1790.28
	7.95	-347.595					7.95	-49.1333
	8	-481.75					8	-52.9785
	8.05	-461.67					8.05	-58.1055
	8.1	-454.346					8.1	-62.1948
	8.15	-461.06					8.15	-65.1245
	8.2	-892.456					8.2	-64.6362
	8.25	-461.487					8.25	781.738
	8.3	-438.599					8.3	699.036
	8.35	-456.299					8.35	-81.7261
	8.4	-450.745					8.4	-65.6128
	8.45	-449.28					8.45	-67.688
	8.5	-448.914					8.5	-69.397
	8.55	-444.092					8.55	-69.6411
	8.6	-451.965					8.6	-1456.48
	8.65	-458.557					8.65	-1999.94
	8.7	-470.459					8.7	-86.853
	8.75	-490.112					8.75	-68.3594
	8.8	-490.051					8.8	-67.5659
	8.85	-474.548					8.85	-70.9839
	8.9	-462.585					8.9	-71.8384
	8.95	-457.703					8.95	-79.2236
	9	-453.186					9	-90.1489
	9.05	-450.623					9.05	-113.342
	9.1	-448.975					9.1	-151.123
	9.15	-447.754					9.15	-146.118
	9.2	-447.998					9.2	-122.681
	9.25	-447.51					9.25	-100.403
	9.3	-446.716					9.3	-83.374
	9.35	-445.19					9.35	-77.6367
	9.4	-447.571					9.4	-72.7539
	9.45	-446.411					9.45	-70.5566
	9.5	-447.021					9.5	-71.0449
	9.55	-445.862					9.55	-69.3359
	9.6	-447.571					9.6	-68.6645
	9.65	-445.068					9.65	-69.7632
	9.7	-446.533					9.7	-69.0308
	9.75	-445.251					9.75	-68.5425
	9.8	-444.336					9.8	-68.1763
	9.85	-443.726					9.85	-69.3359
	9.9	-444.824					9.9	-67.9321
	9.95	-444.58					9.95	-65.3076
	10	-445.312					10	-64.6362
	10.05	-444.763					10.05	-66.8335
	10.1	-444.458					10.1	-65.3076
	10.15	-443.909					10.15	-67.8101
	10.2	-443.97					10.2	-67.4438
	10.25	-443.542					10.25	-68.6035
	10.3	-444.031					10.3	-68.7256
	10.35	-443.237					10.35	-69.519
	10.4	-444.092					10.4	-70.8618
	10.45	-443.237					10.45	-71.6553
	10.5	-443.848					10.5	-71.7163
	10.55	-442.932					10.55	-72.4487
	10.6	-441.406					10.6	-71.167
	10.65	-440.369					10.65	-70.0684
	10.7	-439.819					10.7	-69.2749
	10.75	-441.223					10.75	-69.9463
	10.8	-442.078					10.8	-71.6553
	10.85	-442.566					10.85	-69.6411
	10.9	-442.2					10.9	-71.7773
	10.95	-440.796					10.95	-71.4722
	11	-439.27					11	-71.6553
	11.05	-438.721					11.05	-68.1763
	11.1	-440.613					11.1	-69.8852
	11.15	-439.636					11.15	-69.8242
	11.2	-441.528					11.2	-72.2046
	11.25	-441.895					11.25	-70.8008
	11.3	-442.749					11.3	-71.9604
	11.35	-440.674					11.35	-72.3877
	11.4	-440.063					11.4	-73.3643
	11.45	-440.186					11.45	-70.9228
	11.5	-440.43					11.5	-65.6128
	11.55	-440.918					11.55	-70.9228
	11.6	-441.406					11.6	-69.8242
	11.65	-438.538					11.65	-70.1904
	11.7	-438.721					11.7	-69.7632
	11.75	-439.453					11.75	-66.7725
	11.8	-439.514					11.8	-69.5801
	11.85	-440.613					11.85	-71.5332
	11.9	-441.284					11.9	-67.5049
	11.95	-441.04					11.95	-69.9463
	12	-440.552					12	-68.2983
	12.05	-442.2					12.05	-66.4673
	12.1	-441.528					12.1	-68.9697
	12.15	-440.796					12.15	-70.8618
	12.2	-441.406					12.2	-67.749
	12.25	-442.2					12.25	-69.458
	12.3	-442.749					12.3	-68.3594
	12.35	-443.665					12.35	-68.3594
	12.4	-444.641					12.4	-68.1763
	12.45	-445.923					12.45	-68.7866
	12.5	-446.411					12.5	-69.2749
	12.55	-447.449					12.55	-68.2983
	12.6	-445.618					12.6	-68.1152
	12.65	-449.402					12.65	-68.8476
	12.7	-449.219					12.7	-69.458
	12.75	-451.355					12.75	-69.0308
	12.8	-449.097					12.8	-68.4204
	12.85	-450.073					12.85	-68.5425
	12.9	-450.195					12.9	-68.9087
	12.95	-450.806					12.95	-67.8711
	13	-451.66					13	-68.8476
	13.05	-451.843					13.05	-69.5801
	13.1	-452.148					13.1	-69.2749
	13.15	-452.148					13.15	-67.9932
	13.2	-453.064					13.2	-67.9321
	13.25	-452.637					13.25	-69.0308
	13.3	-451.416					13.3	-68.8476
	13.35	-450.928					13.35	-68.8476
	13.4	-452.759					13.4	-69.2749
	13.45	-452.881					13.45	-67.1387
	13.5	-451.538					13.5	-67.5049
	13.55	-452.27					13.55	-69.2749
	13.6	-450.073					13.6	-69.9463
	13.65	-449.341					13.65	-69.2139
	13.7	-451.416					13.7	-70.2515
	13.75	-449.524					13.75	-69.7021
	13.8	-450.073					13.8	-69.5801
	13.85	-453.186					13.85	-68.2983
	13.9	-449.585					13.9	-69.458
	13.95	-451.294					13.95	-68.5425
	14	-452.454					14	-69.519
	14.05	-452.759					14.05	-69.458
	14.1	-451.05					14.1	-69.3359
	14.15	-451.721					14.15	-69.0308
	14.2	-449.402					14.2	-67.749
	14.25	-450.439					14.25	-69.0308
	14.3	-451.965					14.3	-69.8242
	14.35	-453.247					14.35	-68.1763
	14.4	-453.186					14.4	-68.7256
	14.45	-453.125					14.45	-69.6411
	14.5	-453.613					14.5	-68.4814
	14.55	-454.102					14.55	-68.7256
	14.6	-454.468					14.6	-69.519
	14.65	-454.407					14.65	-68.6035
	14.7	-455.872					14.7	-69.2749
	14.75	-455.139					14.75	-68.1152
	14.8	-453.552					14.8	-69.458
	14.85	-453.491					14.85	-70.1904
	14.9	-453.369					14.9	-68.4814
	14.95	-452.637					14.95	-67.4438
	15	-455.383					15	-69.397
	15.05	-451.843					15.05	-68.9087
	15.1	-450.867					15.1	-68.0542
							15.15	-69.0308
							15.2	-70.0684
							15.25	-69.0918
							15.3	-69.0308
							15.35	-70.0073
							15.4	-69.2139
							15.45	-68.1152
							15.5	-68.3594
							15.55	-67.5049
							15.6	-68.6035
							15.65	-68.7256
							15.7	-67.749
							15.75	-70.3125
							15.8	-68.9697
							15.85	-67.3828
							15.9	-69.0308
							15.95	-68.7256
							16	-69.2139
							16.05	-68.6035
							16.1	-69.5801
							16.15	-69.0308
							16.2	-68.7866
							16.25	-67.0776
							16.3	-67.9321
							16.35	-69.0918
							16.4	-69.7021
							16.45	-70.0073
							16.5	-68.6035
							16.55	-69.2749
							16.6	-68.2983
							16.65	-69.2139
							16.7	-68.5425
							16.75	-69.0308
							16.8	-69.6411
							16.85	-70.3125
							16.9	-69.0918
							16.95	-69.6411
							17	-70.2515
							17.05	-70.3125
							17.1	-69.397
							17.15	-68.9087
							17.2	-69.5801
							17.25	-68.7256
							17.3	-68.7866
							17.35	-67.4438
							17.4	-69.519
							17.45	-69.0918
							17.5	-68.6035
							17.55	-68.4204
							17.6	-68.1763
							17.65	-69.1528
							17.7	-69.519
							17.75	-69.1528
							17.8	-67.749
							17.85	-68.5425
							17.9	-67.8101
							17.95	-68.1763
							18	-68.3594
							18.05	-69.0308
							18.1	-68.9087
							18.15	-68.0542
							18.2	-66.4062
							18.25	-68.1152
							18.3	-69.0308
							18.35	-69.8242
							18.4	-68.9697
							18.45	-68.4814
							18.5	-69.397
							18.55	-69.9463
							18.6	-69.397
							18.65	-68.7866
							18.7	-70.4346
							18.75	-70.1294
							18.8	-68.7256
							18.85	-69.5801
							18.9	-68.1763
							18.95	-68.9087
							19	-68.8476
							19.05	-69.9463
							19.1	-69.1528
							19.15	-69.0308
							19.2	-69.3359
							19.25	-69.7632
							19.3	-67.6269
							19.35	-69.0918
							19.4	-69.1528
							19.45	-69.3359
							19.5	-66.4673
							19.55	-67.4438
							19.6	-69.1528
							19.65	-68.7256
							19.7	-70.1904
							19.75	-67.749
							19.8	-69.0308
							19.85	-69.5801
							19.9	-69.458
							19.95	-70.1294
							20	-69.6411
							20.05	-70.3125
							20.1	-69.8242
							20.15	-70.6787
							20.2	-70.5566
							20.25	-69.8852
							20.3	-70.4346
							20.35	-68.9087
							20.4	-68.9697
							20.45	-69.8852
							20.5	-70.7397
							20.55	-68.4204
							20.6	-70.6177
							20.65	-69.6411
							20.7	-70.0684
							20.75	-68.7256
							20.8	-70.4956
							20.85	-69.2749
							20.9	-70.5566
							20.95	-69.6411
							21	-68.8476
							21.05	-69.7632
							21.1	-68.9087
							21.15	-68.7256
							21.2	-70.1294
							21.25	-69.0308
							21.3	-70.0073
							21.35	-68.8476
							21.4	-69.519
							21.45	-69.6411
							21.5	-69.3359
							21.55	-70.2515
							21.6	-69.2139
							21.65	-70.2515
							21.7	-68.4814
							21.75	-70.2515
							21.8	-70.0684
							21.85	-69.1528
							21.9	-68.4204
							21.95	-68.3594
							22	-68.6645
							22.05	-70.1294
							22.1	-68.8476
							22.15	-69.1528
							22.2	-70.1294
							22.25	-69.458
							22.3	-70.7397
							22.35	-69.3359
							22.4	-67.688
							22.45	-68.8476
							22.5	-67.9932
							22.55	-69.1528
							22.6	-69.7021
							22.65	-68.7256
							22.7	-68.9697
							22.75	-70.0073
							22.8	-70.4346
							22.85	-70.1294
							22.9	-68.8476
							22.95	-68.8476
							23	-68.0542
							23.05	-67.688
							23.1	-69.458
							23.15	-67.688
							23.2	-69.2139
							23.25	-67.9932
							23.3	-68.0542
							23.35	-68.5425
							23.4	-68.1152
							23.45	-68.1763
							23.5	-69.9463
							23.55	-68.1763
							23.6	-67.8101
							23.65	-68.8476
							23.7	-69.0918
							23.75	-70.2515
							23.8	-69.2139
							23.85	-68.7256
							23.9	-70.0684
							23.95	-66.4673
							24	-69.2749
							24.05	-68.4814
							24.1	-70.5566
							24.15	-69.7021
							24.2	-69.5801
							24.25	-68.7866
							24.3	-70.3735
							24.35	-69.7021
							24.4	-66.9556
