# Supplementary material for: The fluoride permeation pathway and anion recognition in Fluc family fluoride channels
Source: eLife. 2021 Jul 12;10:e69482. doi: 10.7554/eLife.69482 (PMC8315801; doi:10.7554/eLife.69482)
Supplement: Figure 1—source data 2. [file elife-69482-fig1-data2.xlsx]

## Sheet: Sheet1
Fluc-Bpe-I50W	Figure:	0	0.0046		Replicates: Rate in 1/s
F- dump		0.1	-0.0036			Prep 1	Prep 2
		0.2	0.0046			600	650
		0.3	-0.0036			720	550
		0.4	-0.0036			960	720
		0.5	0.0046
		0.6	-0.0036
		0.7	0.0046
		0.8	0.0046
		0.9	0.0046
		1	-0.0036
		1.1	0.0046
		1.2	0.0127333
		1.3	0.0127333
		1.4	-0.0036
		1.5	0.0046
		1.6	0.0046
		1.7	0.0046
		1.8	-0.0036
		1.9	0.0127333
		2	-0.0036
		2.1	0.0046
		2.2	-0.0036
		2.3	0.0046
		2.4	-0.0036
		2.5	0.0046
		2.6	0.0127333
		2.7	0.0046
		2.8	-0.0036
		2.9	0.0046
		3	0.0046
		3.1	0.0127333
		3.2	0.0046
		3.3	-0.0117333
		3.4	0.0046
		3.5	-0.0036
		3.6	0.0046
		3.7	0.0046
		3.8	0.0208667
		3.9	0.0046
		4	-0.0117333
		4.1	0.0046
		4.2	0.0208667
		4.3	-0.0036
		4.4	0.0208667
		4.5	0.0046
		4.6	0.0046
		4.7	0.0127333
		4.8	0.0046
		4.9	-0.0036
		5	0.0046
		5.1	0.0046
		5.2	0.0046
		5.3	0.0046
		5.4	-0.0036
		5.5	-0.0036
		5.6	-0.0036
		5.7	0.0046
		5.8	-0.0036
		5.9	0.0046
		6	0.0046
		6.1	0.0046
		6.2	-0.0036
		6.3	0.0046
		6.4	0.0127333
		6.5	0.0127333
		6.6	0.0127333
		6.7	0.0046
		6.8	0.0127333
		6.9	-0.0036
		7	0.0046
		7.1	0.0046
		7.2	0.0127333
		7.3	0.0208667
		7.4	0.0046
		7.5	0.0127333
		7.6	0.0046
		7.7	0.0127333
		7.8	0.0127333
		7.9	0.0046
		8	0.0127333
		8.1	-0.0036
		8.2	0.0046
		8.3	0.0046
		8.4	0.0046
		8.5	0.0127333
		8.6	0.0046
		8.7	0.0127333
		8.8	0.0046
		8.9	0.0046
		9	0.0046
		9.1	0.0127333
		9.2	0.0046
		9.3	0.0046
		9.4	0.0127333
		9.5	0.0208667
		9.6	0.0046
		9.7	0.0046
		9.8	0.0046
		9.9	0.0127333
		10	0.0127333
		10.1	0.0127333
		10.2	0.0127333
		10.3	0.0127333
		10.4	0.029
		10.5	0.0127333
		10.6	0.029
		10.7	0.0208667
		10.8	0.0127333
		10.9	0.029
		11	0.0127333
		11.1	0.0127333
		11.2	0.0127333
		11.3	0.0127333
		11.4	0.0208667
		11.5	0.0208667
		11.6	0.0208667
		11.7	0.0208667
		11.8	0.0127333
		11.9	0.0208667
		12	0.0208667
		12.1	0.029
		12.2	0.029
		12.3	0.0208667
		12.4	0.0208667
		12.5	0.0208667
		12.6	0.029
		12.7	0.0208667
		12.8	0.0371333
		12.9	0.0371333
		13	0.0452667
		13.1	0.0534
		13.2	0.0371333
		13.3	0.0371333
		13.4	0.0371333
		13.5	0.0534
		13.6	0.0534
		13.7	0.0534
		13.8	0.0534
		13.9	0.0534
		14	0.0452667
		14.1	0.0534
		14.2	0.0534
		14.3	0.0452667
		14.4	0.0534
		14.5	0.0534
		14.6	0.0615333
		14.7	0.0371333
		14.8	0.0534
		14.9	0.0615333
		15	0.0534
		15.1	0.0615333
		15.2	0.0534
		15.3	0.0696667
		15.4	0.0615333
		15.5	0.0452667
		15.6	0.0615333
		15.7	0.0696667
		15.8	0.0615333
		15.9	0.0615333
		16	0.0615333
		16.1	0.0859333
		16.2	0.0696667
		16.3	0.0778
		16.4	0.0859333
		16.5	0.0778
		16.6	0.0778
		16.7	0.0696667
		16.8	0.0778
		16.9	0.0859333
		17	0.0859333
		17.1	0.0859333
		17.2	0.0859333
		17.3	0.0859333
		17.4	0.0940667
		17.5	0.0859333
		17.6	0.0778
		17.7	0.0940667
		17.8	0.0778
		17.9	0.0940667
		18	0.0859333
		18.1	0.0859333
		18.2	0.0859333
		18.3	0.0940667
		18.4	0.1022
		18.5	0.0859333
		18.6	0.1022
		18.7	0.0940667
		18.8	0.0859333
		18.9	0.0859333
		19	0.0940667
		19.1	0.0940667
		19.2	0.0940667
		19.3	0.110333
		19.4	0.0940667
		19.5	0.0859333
		19.6	0.0940667
		19.7	0.1022
		19.8	0.0940667
		19.9	0.1022
		20	0.1022
		20.1	0.0940667
		20.2	0.0940667
		20.3	0.1022
		20.4	0.118533
		20.5	0.110333
		20.6	0.1022
		20.7	0.110333
		20.8	0.110333
		20.9	0.110333
		21	0.110333
		21.1	0.1022
		21.2	0.0940667
		21.3	0.110333
		21.4	0.110333
		21.5	0.1022
		21.6	0.1022
		21.7	0.110333
		21.8	0.110333
		21.9	0.110333
		22	0.118533
		22.1	0.1022
		22.2	0.118533
		22.3	0.110333
		22.4	0.126667
		22.5	0.110333
		22.6	0.126667
		22.7	0.126667
		22.8	0.126667
		22.9	0.118533
		23	0.126667
		23.1	0.1348
		23.2	0.1348
		23.3	0.142933
		23.4	0.1348
		23.5	0.1348
		23.6	0.126667
		23.7	0.1348
		23.8	0.126667
		23.9	0.151067
		24	0.142933
		24.1	0.151067
		24.2	0.1348
		24.3	0.1348
		24.4	0.142933
		24.5	0.142933
		24.6	0.1348
		24.7	0.1348
		24.8	0.142933
		24.9	0.142933
		25	0.142933
		25.1	0.142933
		25.2	0.1348
		25.3	0.142933
		25.4	0.142933
		25.5	0.1348
		25.6	0.142933
		25.7	0.151067
		25.8	0.142933
		25.9	0.1348
		26	0.142933
		26.1	0.151067
		26.2	0.1348
		26.3	0.142933
		26.4	0.151067
		26.5	0.1592
		26.6	0.142933
		26.7	0.151067
		26.8	0.151067
		26.9	0.151067
		27	0.151067
		27.1	0.1592
		27.2	0.151067
		27.3	0.167333
		27.4	0.1592
		27.5	0.167333
		27.6	0.151067
		27.7	0.1592
		27.8	0.142933
		27.9	0.167333
		28	0.1592
		28.1	0.1592
		28.2	0.1592
		28.3	0.167333
		28.4	0.167333
		28.5	0.167333
		28.6	0.151067
		28.7	0.167333
		28.8	0.1592
		28.9	0.167333
		29	0.151067
		29.1	0.175467
		29.2	0.167333
		29.3	0.1592
		29.4	0.167333
		29.5	0.175467
		29.6	0.1592
		29.7	0.175467
		29.8	0.1592
		29.9	0.167333
		30	0.167333
		30.1	0.167333
		30.2	0.1836
		30.3	0.1592
		30.4	0.175467
		30.5	0.175467
		30.6	0.167333
		30.7	0.1836
		30.8	0.167333
		30.9	0.1836
		31	0.1836
		31.1	0.175467
		31.2	0.167333
		31.3	0.175467
		31.4	0.175467
		31.5	0.1836
		31.6	0.175467
		31.7	0.175467
		31.8	0.191733
		31.9	0.175467
		32	0.1836
		32.1	0.1836
		32.2	0.199867
		32.3	0.1836
		32.4	0.1836
		32.5	0.1836
		32.6	0.191733
		32.7	0.1836
		32.8	0.191733
		32.9	0.191733
		33	0.191733
		33.1	0.191733
		33.2	0.199867
		33.3	0.199867
		33.4	0.199867
		33.5	0.199867
		33.6	0.199867
		33.7	0.199867
		33.8	0.191733
		33.9	0.191733
		34	0.199867
		34.1	0.208
		34.2	0.191733
		34.3	0.191733
		34.4	0.199867
		34.5	0.199867
		34.6	0.191733
		34.7	0.199867
		34.8	0.199867
		34.9	0.199867
		35	0.199867
		35.1	0.199867
		35.2	0.199867
		35.3	0.191733
		35.4	0.199867
		35.5	0.208
		35.6	0.199867
		35.7	0.199867
		35.8	0.208
		35.9	0.199867
		36	0.208
		36.1	0.199867
		36.2	0.208
		36.3	0.208
		36.4	0.208
		36.5	0.199867
		36.6	0.208
		36.7	0.208
		36.8	0.216133
		36.9	0.208
		37	0.216133
		37.1	0.216133
		37.2	0.216133
		37.3	0.208
		37.4	0.216133
		37.5	0.224267
		37.6	0.208
		37.7	0.216133
		37.8	0.216133
		37.9	0.224267
		38	0.232467
		38.1	0.2406
		38.2	0.232467
		38.3	0.2406
		38.4	0.232467
		38.5	0.224267
		38.6	0.216133
		38.7	0.216133
		38.8	0.224267
		38.9	0.2406
		39	0.2406
		39.1	0.232467
		39.2	0.232467
		39.3	0.2406
		39.4	0.232467
		39.5	0.224267
		39.6	0.232467
		39.7	0.2406
		39.8	0.2406
		39.9	0.232467
		40	0.224267
		40.1	0.232467
		40.2	0.248733
		40.3	0.232467
		40.4	0.232467
		40.5	0.232467
		40.6	0.2406
		40.7	0.232467
		40.8	0.224267
		40.9	0.232467
		41	0.2406
		41.1	0.2406
		41.2	0.232467
		41.3	0.232467
		41.4	0.224267
		41.5	0.232467
		41.6	0.232467
		41.7	0.232467
		41.8	0.2406
		41.9	0.224267
		42	0.232467
		42.1	0.2406
		42.2	0.248733
		42.3	0.2406
		42.4	0.248733
		42.5	0.2406
		42.6	0.2406
		42.7	0.2406
		42.8	0.248733
		42.9	0.248733
		43	0.248733
		43.1	0.2406
		43.2	0.248733
		43.3	0.248733
		43.4	0.248733
		43.5	0.256867
		43.6	0.248733
		43.7	0.248733
		43.8	0.248733
		43.9	0.256867
		44	0.256867
		44.1	0.265
		44.2	0.265
		44.3	0.256867
		44.4	0.265
		44.5	0.265
		44.6	0.265
		44.7	0.248733
		44.8	0.248733
		44.9	0.256867
		45	0.256867
		45.1	0.256867
		45.2	0.256867
		45.3	0.273133
		45.4	0.265
		45.5	0.265
		45.6	0.265
		45.7	0.256867
		45.8	0.265
		45.9	0.256867
		46	0.265
		46.1	0.265
		46.2	0.273133
		46.3	0.256867
		46.4	0.265
		46.5	0.265
		46.6	0.273133
		46.7	0.273133
		46.8	0.265
		46.9	0.256867
		47	0.265
		47.1	0.273133
		47.2	0.281267
		47.3	0.265
		47.4	0.265
		47.5	0.273133
		47.6	0.273133
		47.7	0.265
		47.8	0.273133
		47.9	0.273133
		48	0.273133
		48.1	0.273133
		48.2	0.273133
		48.3	0.265
		48.4	0.281267
		48.5	0.281267
		48.6	0.273133
		48.7	0.273133
		48.8	0.273133
		48.9	0.281267
		49	0.273133
		49.1	0.273133
		49.2	0.273133
		49.3	0.273133
		49.4	0.281267
		49.5	0.281267
		49.6	0.281267
		49.7	0.281267
		49.8	0.281267
		49.9	0.281267
		50	0.265
		50.1	0.281267
		50.2	0.2894
		50.3	0.2894
		50.4	0.281267
		50.5	0.281267
		50.6	0.281267
		50.7	0.2894
		50.8	0.281267
		50.9	0.2894
		51	0.281267
		51.1	0.281267
		51.2	0.2894
		51.3	0.281267
		51.4	0.2894
		51.5	0.2894
		51.6	0.281267
		51.7	0.281267
		51.8	0.2894
		51.9	0.2894
		52	0.2894
		52.1	0.297533
		52.2	0.2894
		52.3	0.2894
		52.4	0.2894
		52.5	0.297533
		52.6	0.297533
		52.7	0.297533
		52.8	0.297533
		52.9	0.297533
		53	0.297533
		53.1	0.297533
		53.2	0.297533
		53.3	0.2894
		53.4	0.2894
		53.5	0.281267
		53.6	0.297533
		53.7	0.305667
		53.8	0.305667
		53.9	0.297533
		54	0.305667
		54.1	0.3138
		54.2	0.3138
		54.3	0.297533
		54.4	0.2894
		54.5	0.305667
		54.6	0.297533
		54.7	0.305667
		54.8	0.297533
		54.9	0.2894
		55	0.297533
		55.1	0.305667
		55.2	0.297533
		55.3	0.281267
		55.4	0.297533
		55.5	0.297533
		55.6	0.297533
		55.7	0.297533
		55.8	0.305667
		55.9	0.305667
		56	0.3138
		56.1	0.3138
		56.2	0.321933
		56.3	0.3138
		56.4	0.3138
		56.5	0.305667
		56.6	0.305667
		56.7	0.305667
		56.8	0.305667
		56.9	0.3138
		57	0.305667
		57.1	0.3138
		57.2	0.3138
		57.3	0.297533
		57.4	0.297533
		57.5	0.3138
		57.6	0.3138
		57.7	0.305667
		57.8	0.3138
		57.9	0.305667
		58	0.3138
		58.1	0.305667
		58.2	0.3138
		58.3	0.305667
		58.4	0.305667
		58.5	0.321933
		58.6	0.3138
		58.7	0.297533
		58.8	0.321933
		58.9	0.305667
		59	0.305667
		59.1	0.3138
		59.2	0.305667
		59.3	0.3138
		59.4	0.321933
		59.5	0.3138
		59.6	0.305667
		59.7	0.3138
		59.8	0.321933
		59.9	0.321933
		60	0.305667
		60.1	0.3138
		60.2	0.321933
		60.3	0.321933
		60.4	0.305667
		60.5	0.305667
		60.6	0.321933
		60.7	0.321933
		60.8	0.305667
		60.9	0.330067
		61	0.3382
		61.1	0.330067
		61.2	0.330067
		61.3	0.330067
		61.4	0.3138
		61.5	0.321933
		61.6	0.3382
		61.7	0.330067
		61.8	0.330067
		61.9	0.330067
		62	0.330067
		62.1	0.321933
		62.2	0.321933
		62.3	0.321933
		62.4	0.330067
		62.5	0.3464
		62.6	0.3382
		62.7	0.3382
		62.8	0.330067
		62.9	0.3464
		63	0.330067
		63.1	0.3382
		63.2	0.3382
		63.3	0.3382
		63.4	0.321933
		63.5	0.330067
		63.6	0.330067
		63.7	0.330067
		63.8	0.321933
		63.9	0.321933
		64	0.321933
		64.1	0.3382
		64.2	0.3382
		64.3	0.3382
		64.4	0.330067
		64.5	0.321933
		64.6	0.330067
		64.7	0.330067
		64.8	0.3382
		64.9	0.330067
		65	0.3382
		65.1	0.3382
		65.2	0.3382
		65.3	0.3464
		65.4	0.3382
		65.5	0.3382
		65.6	0.3464
		65.7	0.3382
		65.8	0.3382
		65.9	0.330067
		66	0.330067
		66.1	0.3382
		66.2	0.3464
		66.3	0.3464
		66.4	0.3464
		66.5	0.3464
		66.6	0.3382
		66.7	0.3464
		66.8	0.3464
		66.9	0.3464
		67	0.3382
		67.1	0.3382
		67.2	0.3464
		67.3	0.3382
		67.4	0.3464
		67.5	0.330067
		67.6	0.3464
		67.7	0.3464
		67.8	0.3382
		67.9	0.3382
		68	0.3464
		68.1	0.3464
		68.2	0.3464
		68.3	0.3464
		68.4	0.3464
		68.5	0.354533
		68.6	0.354533
		68.7	0.354533
		68.8	0.3464
		68.9	0.354533
		69	0.3464
		69.1	0.354533
		69.2	0.362667
		69.3	0.3464
		69.4	0.354533
		69.5	0.3464
		69.6	0.354533
		69.7	0.362667
		69.8	0.3464
		69.9	0.354533
		70	0.354533
		70.1	0.3464
		70.2	0.354533
		70.3	0.362667
		70.4	0.354533
		70.5	0.3464
		70.6	0.3464
		70.7	0.354533
		70.8	0.354533
		70.9	0.362667
		71	0.3464
		71.1	0.3464
		71.2	0.362667
		71.3	0.354533
		71.4	0.354533
		71.5	0.362667
		71.6	0.354533
		71.7	0.354533
		71.8	0.354533
		71.9	0.354533
		72	0.362667
		72.1	0.354533
		72.2	0.362667
		72.3	0.354533
		72.4	0.362667
		72.5	0.362667
		72.6	0.362667
		72.7	0.354533
		72.8	0.354533
		72.9	0.362667
		73	0.3708
		73.1	0.354533
		73.2	0.362667
		73.3	0.3708
		73.4	0.354533
		73.5	0.3708
		73.6	0.378933
		73.7	0.3708
		73.8	0.3708
		73.9	0.362667
		74	0.362667
		74.1	0.362667
		74.2	0.362667
		74.3	0.362667
		74.4	0.362667
		74.5	0.3708
		74.6	0.378933
		74.7	0.3708
		74.8	0.3708
		74.9	0.362667
		75	0.3708
		75.1	0.3708
		75.2	0.3708
		75.3	0.3708
		75.4	0.362667
		75.5	0.378933
		75.6	0.3708
		75.7	0.362667
		75.8	0.3708
		75.9	0.3708
		76	0.378933
		76.1	0.362667
		76.2	0.3708
		76.3	0.3708
		76.4	0.362667
		76.5	0.362667
		76.6	0.3708
		76.7	0.362667
		76.8	0.3708
		76.9	0.378933
		77	0.3708
		77.1	0.362667
		77.2	0.362667
		77.3	0.362667
		77.4	0.3708
		77.5	0.3708
		77.6	0.362667
		77.7	0.378933
		77.8	0.3708
		77.9	0.378933
		78	0.362667
		78.1	0.362667
		78.2	0.378933
		78.3	0.378933
		78.4	0.362667
		78.5	0.3708
		78.6	0.387067
		78.7	0.3708
		78.8	0.362667
		78.9	0.3708
		79	0.378933
		79.1	0.378933
		79.2	0.3708
		79.3	0.3708
		79.4	0.378933
		79.5	0.3952
		79.6	0.378933
		79.7	0.378933
		79.8	0.378933
		79.9	0.378933
		80	0.3708
		80.1	0.387067
		80.2	0.378933
		80.3	0.378933
		80.4	0.378933
		80.5	0.3952
		80.6	0.378933
		80.7	0.378933
		80.8	0.387067
		80.9	0.378933
		81	0.3708
		81.1	0.3708
		81.2	0.387067
		81.3	0.387067
		81.4	0.387067
		81.5	0.387067
		81.6	0.403333
		81.7	0.3952
		81.8	0.387067
		81.9	0.3952
		82	0.3952
		82.1	0.3952
		82.2	0.387067
		82.3	0.3952
		82.4	0.3952
		82.5	0.3952
		82.6	0.3952
		82.7	0.387067
		82.8	0.378933
		82.9	0.3952
		83	0.387067
		83.1	0.387067
		83.2	0.378933
		83.3	0.3952
		83.4	0.3952
		83.5	0.387067
		83.6	0.3952
		83.7	0.403333
		83.8	0.387067
		83.9	0.3952
		84	0.3952
		84.1	0.387067
		84.2	0.3952
		84.3	0.3952
		84.4	0.3952
		84.5	0.387067
		84.6	0.387067
		84.7	0.387067
		84.8	0.387067
		84.9	0.3952
		85	0.3952
		85.1	0.411467
		85.2	0.403333
		85.3	0.3952
		85.4	0.387067
		85.5	0.3952
		85.6	0.403333
		85.7	0.387067
		85.8	0.3952
		85.9	0.403333
		86	0.411467
		86.1	0.403333
		86.2	0.3952
		86.3	0.403333
		86.4	0.3952
		86.5	0.411467
		86.6	0.3952
		86.7	0.403333
		86.8	0.403333
		86.9	0.403333
		87	0.403333
		87.1	0.403333
		87.2	0.403333
		87.3	0.411467
		87.4	0.403333
		87.5	0.411467
		87.6	0.3952
		87.7	0.4196
		87.8	0.411467
		87.9	0.403333
		88	0.403333
		88.1	0.403333
		88.2	0.411467
		88.3	0.4196
		88.4	0.403333
		88.5	0.411467
		88.6	0.4196
		88.7	0.411467
		88.8	0.403333
		88.9	0.411467
		89	0.411467
		89.1	0.411467
		89.2	0.411467
		89.3	0.411467
		89.4	0.411467
		89.5	0.4196
		89.6	0.411467
		89.7	0.3952
		89.8	0.3952
		89.9	0.411467
		90	0.411467
		90.1	0.403333
		90.2	0.411467
		90.3	0.411467
		90.4	0.4196
		90.5	0.411467
		90.6	0.411467
		90.7	0.4196
		90.8	0.4196
		90.9	0.403333
		91	0.403333
		91.1	0.403333
		91.2	0.411467
		91.3	0.4196
		91.4	0.403333
		91.5	0.403333
		91.6	0.4196
		91.7	0.4196
		91.8	0.403333
		91.9	0.411467
		92	0.411467
		92.1	0.403333
		92.2	0.4196
		92.3	0.411467
		92.4	0.403333
		92.5	0.403333
		92.6	0.4196
		92.7	0.411467
		92.8	0.411467
		92.9	0.411467
		93	0.4196
		93.1	0.403333
		93.2	0.403333
		93.3	0.4196
		93.4	0.4196
		93.5	0.427733
		93.6	0.403333
		93.7	0.411467
		93.8	0.4196
		93.9	0.411467
		94	0.411467
		94.1	0.4196
		94.2	0.4196
		94.3	0.4196
		94.4	0.427733
		94.5	0.4196
		94.6	0.427733
		94.7	0.435867
		94.8	0.411467
		94.9	0.403333
		95	0.411467
		95.1	0.4196
		95.2	0.4196
		95.3	0.411467
		95.4	0.427733
		95.5	0.4196
		95.6	0.427733
		95.7	0.427733
		95.8	0.427733
		95.9	0.4196
		96	0.4196
		96.1	0.4196
		96.2	0.411467
		96.3	0.4196
		96.4	0.4196
		96.5	0.4196
		96.6	0.4196
		96.7	0.427733
		96.8	0.4196
		96.9	0.411467
		97	0.427733
		97.1	0.4196
		97.2	0.4196
		97.3	0.411467
		97.4	0.4196
		97.5	0.411467
		97.6	0.411467
		97.7	0.4196
		97.8	0.4196
		97.9	0.427733
		98	0.4196
		98.1	0.4196
		98.2	0.4196
		98.3	0.435867
		98.4	0.411467
		98.5	0.411467
		98.6	0.4196
		98.7	0.435867
		98.8	0.427733
		98.9	0.4196
		99	0.427733
		99.1	0.4196
		99.2	0.4196
		99.3	0.4196
		99.4	0.427733
		99.5	0.4196
		99.6	0.4196
		99.7	0.4196
		99.8	0.4196
		99.9	0.4196
		100	0.4196
		100.1	0.4196
		100.2	0.4196
		100.3	0.4196
		100.4	0.4196
		100.5	0.427733
		100.6	0.427733
		100.7	0.427733
		100.8	0.4196
		100.9	0.4196
		101	0.4196
		101.1	0.4196
		101.2	0.4196
		101.3	0.427733
		101.4	0.427733
		101.5	0.427733
		101.6	0.4196
		101.7	0.435867
		101.8	0.444
		101.9	0.435867
		102	0.4196
		102.1	0.427733
		102.2	0.4196
		102.3	0.427733
		102.4	0.4196
		102.5	0.427733
		102.6	0.444
		102.7	0.435867
		102.8	0.4196
		102.9	0.4196
		103	0.4196
		103.1	0.435867
		103.2	0.427733
		103.3	0.427733
		103.4	0.427733
		103.5	0.4196
		103.6	0.4196
		103.7	0.427733
		103.8	0.4196
		103.9	0.435867
		104	0.427733
		104.1	0.4196
		104.2	0.427733
		104.3	0.435867
		104.4	0.435867
		104.5	0.427733
		104.6	0.427733
		104.7	0.435867
		104.8	0.435867
		104.9	0.427733
		105	0.435867
		105.1	0.427733
		105.2	0.435867
		105.3	0.427733
		105.4	0.427733
		105.5	0.427733
		105.6	0.435867
		105.7	0.435867
		105.8	0.427733
		105.9	0.427733
		106	0.444
		106.1	0.435867
		106.2	0.4196
		106.3	0.435867
		106.4	0.4196
		106.5	0.444
		106.6	0.435867
		106.7	0.444
		106.8	0.435867
		106.9	0.427733
		107	0.427733
		107.1	0.435867
		107.2	0.435867
		107.3	0.427733
		107.4	0.427733
		107.5	0.427733
		107.6	0.444
		107.7	0.435867
		107.8	0.435867
		107.9	0.435867
		108	0.435867
		108.1	0.435867
		108.2	0.427733
		108.3	0.435867
		108.4	0.435867
		108.5	0.427733
		108.6	0.427733
		108.7	0.435867
		108.8	0.427733
		108.9	0.444
		109	0.484733
		109.1	0.5254
		109.2	0.598667
		109.3	0.623067
		109.4	0.696333
		109.5	0.834667
		109.6	0.9486
		109.7	0.9974
		109.8	1.00553
		109.9	0.9974
		110	1.00553
		110.1	1.00553
		110.2	1.00553
		110.3	0.981133
		110.4	0.9486
		110.5	0.940467
		110.6	0.9242
		110.7	0.9242
		110.8	0.932333
		110.9	0.9486
		111	0.956733
		111.1	0.964867
		111.2	0.964867
		111.3	0.964867
		111.4	0.973
		111.5	0.973
		111.6	0.964867
		111.7	0.973
		111.8	0.964867
		111.9	0.9486
		112	0.956733
		112.1	0.973
		112.2	0.9974
		112.3	1.00553
		112.4	1.01367
		112.5	1.00553
		112.6	1.00553
		112.7	1.02993
		112.8	1.02993
		112.9	1.0218
		113	1.02993
		113.1	1.04627
		113.2	1.03807
		113.3	1.02993
		113.4	1.04627
		113.5	1.02993
		113.6	1.00553
		113.7	1.00553
		113.8	1.01367
		113.9	1.02993
		114	1.04627
		114.1	1.03807
		114.2	1.0218
		114.3	1.03807
		114.4	1.04627
		114.5	1.03807
		114.6	1.02993
		114.7	1.04627
		114.8	1.04627
		114.9	1.04627
		115	1.0544
		115.1	1.0544
		115.2	1.0544
		115.3	1.04627
		115.4	1.03807
		115.5	1.02993
		115.6	1.02993
		115.7	1.0544
		115.8	1.0544
		115.9	1.0544
		116	1.0544
		116.1	1.0544
		116.2	1.0544
