# Supplementary material for: The fluoride permeation pathway and anion recognition in Fluc family fluoride channels
Source: eLife. 2021 Jul 12;10:e69482. doi: 10.7554/eLife.69482 (PMC8315801; doi:10.7554/eLife.69482)
Supplement: Figure 2—source data 1. [file elife-69482-fig2-data1.xlsx]

## Sheet: Sheet1
	S81A	0	0.0124756	0.0144165	0.0128418		S81T	0	0.0017419	0.0027039	-0.00012085		WT	0	0.00412	0.002843		S81C	0	0.0001355	0.00016357	0.00016479		S81A/T82A F	0	4.8828e-06	3.6621e-06			S83A/T84A F	0	0.00639648	0.00545654	0.00551758
Fluc-Ec2		0.1	0.0125122	0.0144043	0.0128296			0.1	0.0017456	0.0027026	-0.00012085			0.1	0.00408	0.0028381			0.1	0.00013306	0.00016235	0.00016479			0.1	2.4414e-06	2.4414e-06			Fluc-Bpe homolog	0.1	0.0064209	0.00544434	0.0055542
F- dump		0.2	0.0125244	0.0143921	0.0128052			0.2	0.0017371	0.0026917	-0.00012085			0.2	0.00406	0.0028259			0.2	0.0001355	0.00016479	0.00016479			0.2	3.6621e-06	2.4414e-06				0.2	0.00640869	0.00541992	0.0055542
		0.3	0.0125488	0.0144287	0.0127075			0.3	0.0017444	0.0026953	-0.00011841			0.3	0.00408	0.0028259			0.3	0.00013428	0.00016479	0.00016479			0.3	6.1035e-06	6.1035e-06				0.3	0.0064209	0.00541992	0.00556641
		0.4	0.0126099	0.0144043	0.0128296			0.4	0.0017468	0.0026685	-0.00012085			0.4	0.00408	0.0028198			0.4	0.00013672	0.00016479	0.00016479			0.4	4.8828e-06	-1.2207e-06				0.4	0.00643311	0.00544434	0.00557861
		0.5	0.0126221	0.0143799	0.0128052			0.5	0.0017493	0.0027002	-0.00011963			0.5	0.00406	0.0028101			0.5	0.0001355	0.00016357	0.00016357			0.5	4.8828e-06	4.8828e-06				0.5	0.00644531	0.00543213	0.00556641
		0.6	0.0125244	0.0144531	0.0128052			0.6	0.0017578	0.0027002	-0.00012085			0.6	0.00408	0.0028137			0.6	0.0001355	0.00016357	0.00016602			0.6	2.4414e-06	4.8828e-06				0.6	0.00638428	0.00543213	0.00552979
		0.7	0.0125854	0.0144409	0.0127441			0.7	0.0017444	0.0027014	-0.00012085			0.7	0.00409	0.0028113			0.7	0.00013672	0.00016479	0.00016479			0.7	6.1035e-06	3.6621e-06				0.7	0.00643311	0.00543213	0.00554199
		0.8	0.0126343	0.0144165	0.0127441			0.8	0.0017285	0.0027051	-0.00011963			0.8	0.00408	0.002804			0.8	0.0001355	0.00016357	0.00016602			0.8	4.8828e-06	2.4414e-06				0.8	0.00643311	0.00541992	0.0055542
		0.9	0.0125977	0.0144165	0.0128052			0.9	0.0017358	0.0027075	-0.00011963			0.9	0.00411	0.0028247			0.9	0.0001355	0.00016479	0.00016479			0.9	3.6621e-06	3.6621e-06				0.9	0.00643311	0.00543213	0.0055542
		1	0.0127075	0.0143921	0.0128784			1	0.0017542	0.0027002	-0.00011963			1	0.00415	0.002843			1	0.0001355	0.00016357	0.00016479			1	3.6621e-06	3.6621e-06				1	0.00643311	0.00543213	0.00556641
		1.1	0.0126587	0.0143311	0.0128906			1.1	0.0017566	0.0027173	-0.00011963			1.1	0.00416	0.0028503			1.1	0.00013672	0.00016479	0.00016479			1.1	6.1035e-06	2.4414e-06				1.1	0.00645752	0.00544434	0.0055542
		1.2	0.0126465	0.0144165	0.0128784			1.2	0.0017456	0.0027051	-0.00011963			1.2	0.00412	0.0028589			1.2	0.00013672	0.00016479	0.00016479			1.2	3.6621e-06	2.4414e-06				1.2	0.00643311	0.00544434	0.0055542
		1.3	0.0125854	0.0143921	0.0129028			1.3	0.0017505	0.0027161	-0.00012085			1.3	0.0041	0.0028601			1.3	0.00013672	0.00016357	0.00016479			1.3	3.6621e-06	4.8828e-06				1.3	0.00643311	0.00543213	0.00554199
		1.4	0.0126099	0.0144043	0.0130615			1.4	0.0017175	0.0027197	-0.00011963			1.4	0.00408	0.002843			1.4	0.0001355	0.00016357	0.00016479			1.4	3.6621e-06	2.4414e-06				1.4	0.00644531	0.00545654	0.00556641
		1.5	0.0125366	0.0143799	0.012915			1.5	0.0017004	0.0027112	-0.00011963			1.5	0.00407	0.0028479			1.5	0.0001355	0.00016479	0.00016479			1.5	3.6621e-06	4.8828e-06				1.5	0.00645752	0.00544434	0.00556641
		1.6	0.0126709	0.0143921	0.0129028			1.6	0.0017188	0.0027051	-0.00011841			1.6	0.00409	0.0028638			1.6	0.00013428	0.00016479	0.00016602			1.6	4.8828e-06	4.8828e-06				1.6	0.00645752	0.00541992	0.00556641
		1.7	0.0126221	0.0143555	0.0128052			1.7	0.00172	0.0027014	-0.00011963			1.7	0.00409	0.0028503			1.7	0.00013672	0.00016602	0.00016479			1.7	2.4414e-06	4.8828e-06				1.7	0.00645752	0.00544434	0.00557861
		1.8	0.0126221	0.0144653	0.0128418			1.8	0.0017261	0.0027112	-0.00012085			1.8	0.00409	0.0028552			1.8	0.00013428	0.00016602	0.00016479			1.8	6.1035e-06	2.4414e-06				1.8	0.00643311	0.00545654	0.00559082
		1.9	0.0126099	0.0144775	0.0128784			1.9	0.0017029	0.0027136	-0.00012085			1.9	0.00409	0.0028638			1.9	0.00013672	0.00016602	0.00016357			1.9	4.8828e-06	4.8828e-06				1.9	0.00644531	0.00546875	0.00557861
		2	0.0125977	0.0144775	0.0128662			2	0.0016968	0.0026941	-0.00012085			2	0.00409	0.0028613			2	0.00013672	0.00016602	0.00016479			2	4.8828e-06	2.4414e-06				2	0.00645752	0.00543213	0.00559082
		2.1	0.0125977	0.0144653	0.0127563			2.1	0.0017078	0.0026965	-0.00011963			2.1	0.00407	0.0028259			2.1	0.0001355	0.00016602	0.00016479			2.1	3.6621e-06	4.8828e-06				2.1	0.00644531	0.00546875	0.00557861
		2.2	0.0126953	0.0144531	0.0127319			2.2	0.0017371	0.0026953	-0.00011963			2.2	0.00409	0.0028479			2.2	0.0001355	0.00016479	0.00016479			2.2	3.6621e-06	4.8828e-06				2.2	0.00643311	0.00543213	0.00557861
		2.3	0.0126587	0.0143921	0.0128296			2.3	0.0017285	0.0026794	-0.00011963			2.3	0.0041	0.0028442			2.3	0.0001355	0.00016602	0.00016479			2.3	3.6621e-06	3.6621e-06				2.3	0.00644531	0.00544434	0.00557861
		2.4	0.0126343	0.0144287	0.012854			2.4	0.0017139	0.002699	-0.00012085			2.4	0.00409	0.0028516			2.4	0.00013672	0.00016724	0.00016479			2.4	4.8828e-06	4.8828e-06				2.4	0.0064209	0.00545654	0.00559082
		2.5	0.0126587	0.0144775	0.0128296			2.5	0.0017273	0.0026965	-0.00012085			2.5	0.00407	0.002865			2.5	0.00013672	0.00016602	0.00016479			2.5	3.6621e-06	2.4414e-06				2.5	0.00640869	0.00544434	0.00554199
		2.6	0.0126709	0.0144775	0.0128784			2.6	0.0017334	0.0026929	-0.00012085			2.6	0.00409	0.0028552			2.6	0.0001355	0.00016602	0.00016479			2.6	4.8828e-06	3.6621e-06				2.6	0.0064209	0.00548096	0.0055542
		2.7	0.0126465	0.014502	0.0128418			2.7	0.0017078	0.0026978	-0.00011963			2.7	0.00408	0.0028406			2.7	0.00013672	0.00016479	0.00016479			2.7	3.6621e-06	7.3242e-06				2.7	0.00644531	0.00546875	0.00556641
		2.8	0.0124878	0.014502	0.0128296			2.8	0.0017285	0.0026953	-0.00012085			2.8	0.00408	0.0028638			2.8	0.00013672	0.00016479	0.00016602			2.8	4.8828e-06	4.8828e-06				2.8	0.00644531	0.00543213	0.00554199
		2.9	0.0125	0.0145142	0.0130493			2.9	0.0017297	0.002666	-0.00012085			2.9	0.00408	0.0028711			2.9	0.00013672	0.00016602	0.00016479			2.9	4.8828e-06	4.8828e-06				2.9	0.00644531	0.00544434	0.00554199
		3	0.0124878	0.014502	0.0129761			3	0.0017371	0.0026709	-0.00012207			3	0.00407	0.0028528			3	0.00013672	0.00016479	0.00016602			3	3.6621e-06	4.8828e-06				3	0.00645752	0.00545654	0.00554199
		3.1	0.0125244	0.014563	0.012854			3.1	0.0017371	0.0026672	-0.00012085			3.1	0.00407	0.0028516			3.1	0.00013672	0.00016602	0.00016479			3.1	3.6621e-06	3.6621e-06				3.1	0.00644531	0.00544434	0.00552979
		3.2	0.012561	0.0144775	0.0128906			3.2	0.0017322	0.0026709	-0.00011963			3.2	0.00407	0.002865			3.2	0.0001355	0.00016479	0.00016479			3.2	4.8828e-06	3.6621e-06				3.2	0.00645752	0.00545654	0.00554199
		3.3	0.0125488	0.0144897	0.0129028			3.3	0.0017249	0.0026709	-0.00011963			3.3	0.00406	0.0028589			3.3	0.00013672	0.00016602	0.00016602			3.3	3.6621e-06	4.8828e-06				3.3	0.00645752	0.00544434	0.00556641
		3.4	0.0125122	0.0145508	0.0128418			3.4	0.0017346	0.002666	-0.00012085			3.4	0.00406	0.0028088			3.4	0.0001355	0.00016602	0.00016602			3.4	6.1035e-06	2.4414e-06				3.4	0.00645752	0.00543213	0.0055542
		3.5	0.0125977	0.0146362	0.0129639			3.5	0.0017432	0.0026648	-0.00012085			3.5	0.00408	0.0028052			3.5	0.0001355	0.00016602	0.00016479			3.5	3.6621e-06	3.6621e-06				3.5	0.00646973	0.00541992	0.00556641
		3.6	0.0125854	0.0145752	0.0128906			3.6	0.0017493	0.0026538	-0.00012085			3.6	0.00407	0.002793			3.6	0.0001355	0.00016602	0.00016479			3.6	6.1035e-06	6.1035e-06				3.6	0.00644531	0.00543213	0.00557861
		3.7	0.0126343	0.0147095	0.0128418			3.7	0.0017578	0.0026636	-0.00011841			3.7	0.00408	0.0028052			3.7	0.00013672	0.00016479	0.00016479			3.7	2.4414e-06	2.4414e-06				3.7	0.00644531	0.00545654	0.00556641
		3.8	0.0126831	0.0146606	0.0129272			3.8	0.0017505	0.0026746	-0.00011963			3.8	0.0041	0.0028113			3.8	0.00013672	0.00016602	0.00016602			3.8	6.1035e-06	6.1035e-06				3.8	0.00645752	0.00544434	0.00552979
		3.9	0.0127197	0.0145386	0.0129028			3.9	0.0017517	0.0026685	-0.00011963			3.9	0.0041	0.0028259			3.9	0.00013672	0.00016479	0.00016479			3.9	3.6621e-06	6.1035e-06				3.9	0.00645752	0.00544434	0.00557861
		4	0.0126831	0.0145752	0.012915			4	0.0017297	0.0026697	-0.00011963			4	0.00409	0.0028015			4	0.00013672	0.00016479	0.00016479			4	6.1035e-06	4.8828e-06				4	0.00645752	0.00544434	0.00556641
		4.1	0.0126831	0.0145508	0.0129028			4.1	0.0017493	0.0026709	-0.00011963			4.1	0.00411	0.0028247			4.1	0.00013794	0.00016602	0.00016479			4.1	4.8828e-06	4.8828e-06				4.1	0.00645752	0.00541992	0.00556641
		4.2	0.0126709	0.014563	0.0129517			4.2	0.0017578	0.0026624	-0.00011963			4.2	0.00411	0.0028137			4.2	0.00013794	0.00016479	0.00016602			4.2	4.8828e-06	8.5449e-06				4.2	0.00644531	0.00545654	0.00557861
		4.3	0.0126831	0.0146484	0.0129883			4.3	0.0017444	0.0026892	-0.00011963			4.3	0.00407	0.0028088			4.3	0.00013672	0.00016479	0.00016479			4.3	6.1035e-06	4.8828e-06				4.3	0.00644531	0.00545654	0.00556641
		4.4	0.0127075	0.0145996	0.0129395			4.4	0.0017407	0.0026831	-0.00012085			4.4	0.00406	0.0028235			4.4	0.00013672	0.00016479	0.00016602			4.4	4.8828e-06	4.8828e-06				4.4	0.00644531	0.00545654	0.0055542
		4.5	0.0126953	0.0146484	0.0129272			4.5	0.0017395	0.0026782	-0.00012085			4.5	0.00408	0.0028088			4.5	0.0001355	0.00016602	0.00016479			4.5	4.8828e-06	3.6621e-06				4.5	0.00645752	0.00546875	0.00556641
		4.6	0.0126831	0.0146362	0.0127808			4.6	0.0017175	0.0026782	-0.00012085			4.6	0.00406	0.0027905			4.6	0.00013672	0.00016479	0.00016479			4.6	3.6621e-06	6.1035e-06				4.6	0.00644531	0.00545654	0.00559082
		4.7	0.0125977	0.0147095	0.0128784			4.7	0.0017383	0.0026636	-0.00011963			4.7	0.00409	0.0028149			4.7	0.00013672	0.00016479	0.00016479			4.7	2.4414e-06	4.8828e-06				4.7	0.0064209	0.00545654	0.00559082
		4.8	0.0126709	0.0147217	0.0128906			4.8	0.0017419	0.0026501	-0.00012085			4.8	0.00408	0.0028101			4.8	0.00013672	0.00016479	0.00016479			4.8	4.8828e-06	3.6621e-06				4.8	0.00644531	0.00546875	0.00557861
		4.9	0.0126587	0.0147949	0.0128418			4.9	0.0017395	0.0026709	-0.00011963			4.9	0.00408	0.0028088			4.9	0.0001355	0.00016602	0.00016479			4.9	4.8828e-06	4.8828e-06				4.9	0.00640869	0.00548096	0.0055542
		5	0.0126343	0.014856	0.0129272			5	0.0017517	0.0026843	-0.00012085			5	0.00409	0.0028137			5	0.0001355	0.00016602	0.00016602			5	6.1035e-06	6.1035e-06				5	0.00643311	0.00546875	0.00554199
		5.1	0.0126343	0.014917	0.0129395			5.1	0.0017505	0.0026868	-0.00011963			5.1	0.00411	0.0028149			5.1	0.00013672	0.00016479	0.00016724			5.1	3.6621e-06	6.1035e-06				5.1	0.00643311	0.00545654	0.0055542
		5.2	0.0126221	0.0150146	0.0129028			5.2	0.0017285	0.0026758	-0.00011963			5.2	0.00409	0.0028052			5.2	0.00013428	0.00016479	0.00016724			5.2	3.6621e-06	3.6621e-06				5.2	0.00644531	0.00544434	0.00557861
		5.3	0.0126221	0.0151245	0.0129517			5.3	0.0017371	0.0026721	-0.00012085			5.3	0.00409	0.0027991			5.3	0.0001355	0.00016357	0.00016602			5.3	6.1035e-06	4.8828e-06				5.3	0.00644531	0.00543213	0.00556641
		5.4	0.0126221	0.0152222	0.0129883			5.4	0.0017566	0.0026611	-0.00011963			5.4	0.00411	0.0028308			5.4	0.00013672	0.00016479	0.00016602			5.4	7.3242e-06	1.2207e-06				5.4	0.00646973	0.00543213	0.00559082
		5.5	0.0126587	0.0152222	0.0129761			5.5	0.0017505	0.0026807	-0.00011963			5.5	0.0041	0.002854			5.5	0.00013672	0.00016479	0.00016602			5.5	4.8828e-06	4.8828e-06				5.5	0.00645752	0.00543213	0.00557861
		5.6	0.0127197	0.0153564	0.0129517			5.6	0.0017444	0.0026807	-0.00011963			5.6	0.0041	0.002843			5.6	0.0001355	0.00016479	0.00016602			5.6	4.8828e-06	3.6621e-06				5.6	0.00646973	0.00544434	0.00557861
		5.7	0.0127441	0.0153931	0.0130127			5.7	0.0017432	0.0026831	-0.00012085			5.7	0.0041	0.0028381			5.7	0.0001355	0.00016357	0.00016602			5.7	3.6621e-06	3.6621e-06				5.7	0.00646973	0.00544434	0.00556641
		5.8	0.0126953	0.0154297	0.0129639			5.8	0.0017444	0.0026929	-0.00011963			5.8	0.00408	0.0028467			5.8	0.0001355	0.00016357	0.00016602			5.8	3.6621e-06	6.1035e-06				5.8	0.00646973	0.00545654	0.00557861
		5.9	0.0126099	0.0154785	0.012854			5.9	0.0017261	0.002688	-0.00011963			5.9	0.00407	0.0028223			5.9	0.00013672	0.00016602	0.00016602			5.9	3.6621e-06	6.1035e-06				5.9	0.00646973	0.00543213	0.00557861
		6	0.0126831	0.0155273	0.0128662			6	0.0017468	0.0026746	-0.00011963			6	0.00409	0.0028418			6	0.00013672	0.00016968	0.00016602			6	6.1035e-06	6.1035e-06				6	0.00648193	0.00541992	0.00559082
		6.1	0.0126831	0.0154907	0.012854			6.1	0.0017395	0.0026648	-0.00012085			6.1	0.0041	0.0028503			6.1	0.0001355	0.00016846	0.00016479			6.1	4.8828e-06	3.6621e-06				6.1	0.00646973	0.00545654	0.00556641
		6.2	0.0126587	0.0155884	0.012793			6.2	0.0017444	0.0026746	-0.00012085			6.2	0.0041	0.0028833			6.2	0.0001355	0.00016846	0.00016479			6.2	3.6621e-06	3.6621e-06				6.2	0.00646973	0.00544434	0.00556641
		6.3	0.0126465	0.0156128	0.0128418			6.3	0.0017456	0.0026819	-0.00011963			6.3	0.00409	0.0029065			6.3	0.0001355	0.0001709	0.00016479			6.3	4.8828e-06	4.8828e-06				6.3	0.00645752	0.00541992	0.0055542
		6.4	0.0126831	0.015686	0.0128662			6.4	0.0017456	0.0026733	-0.00012085			6.4	0.0041	0.002926			6.4	0.00013672	0.00016968	0.00016479			6.4	7.3242e-06	6.1035e-06				6.4	0.00649414	0.00543213	0.00557861
		6.5	0.0127197	0.0156738	0.0129028			6.5	0.00172	0.0026733	-0.00011963			6.5	0.00409	0.0030103			6.5	0.00013672	0.00016846	0.00016479			6.5	4.8828e-06	4.8828e-06				6.5	0.00648193	0.00541992	0.00556641
		6.6	0.0126709	0.0156616	0.0129883			6.6	0.0017371	0.0026624	-0.00012085			6.6	0.00409	0.0031189			6.6	0.0001355	0.00016724	0.00016602			6.6	6.1035e-06	6.1035e-06				6.6	0.00646973	0.00543213	0.0055542
		6.7	0.0126587	0.0156494	0.0128418			6.7	0.0017444	0.0026477	-0.00012085			6.7	0.0041	0.0031567			6.7	0.00013672	0.00016724	0.00016357			6.7	6.1035e-06	3.6621e-06				6.7	0.00644531	0.00546875	0.00554199
		6.8	0.0126587	0.0157227	0.012915			6.8	0.0017444	0.0026599	-0.00012085			6.8	0.00411	0.0031885			6.8	0.00013672	0.00016602	0.00016602			6.8	3.6621e-06	4.8828e-06				6.8	0.0064209	0.00550537	0.00554199
		6.9	0.0127075	0.0157471	0.0129395			6.9	0.0017505	0.0026624	-0.00011963			6.9	0.00411	0.0032349			6.9	0.00013794	0.00016602	0.00016479			6.9	6.1035e-06	2.4414e-06				6.9	0.00644531	0.00548096	0.00552979
		7	0.0126709	0.0157227	0.012915			7	0.0017371	0.0026721	-0.00011963			7	0.00409	0.003302			7	0.00013794	0.00016479	0.00016479			7	3.6621e-06	3.6621e-06				7	0.00643311	0.00548096	0.00552979
		7.1	0.0126831	0.0157837	0.0128906			7.1	0.0017261	0.002677	-0.00012085			7.1	0.00408	0.0033716			7.1	0.00013916	0.00016602	0.00016357			7.1	4.8828e-06	6.1035e-06				7.1	0.00644531	0.00545654	0.00552979
		7.2	0.0126465	0.0158325	0.0129395			7.2	0.001731	0.0026733	-0.00012085			7.2	0.00407	0.0034045			7.2	0.00013794	0.00016724	0.00016235			7.2	4.8828e-06	3.6621e-06				7.2	0.00645752	0.00546875	0.00554199
		7.3	0.0126831	0.0158325	0.0129395			7.3	0.0017468	0.0026526	-0.00012085			7.3	0.00409	0.0034839			7.3	0.00013794	0.00016968	0.00016357			7.3	6.1035e-06	6.1035e-06				7.3	0.00645752	0.00545654	0.00554199
		7.4	0.0126709	0.0157959	0.0129883			7.4	0.0017639	0.002655	-0.00012085			7.4	0.0041	0.0035742			7.4	0.00013794	0.00016846	0.00016357			7.4	6.1035e-06	4.8828e-06				7.4	0.00644531	0.00544434	0.00557861
		7.5	0.0126465	0.0158936	0.0128784			7.5	0.0017822	0.0026733	-0.00011963			7.5	0.0041	0.0036414			7.5	0.0001355	0.00016724	0.00016357			7.5	6.1035e-06	4.8828e-06				7.5	0.00645752	0.00543213	0.00557861
		7.6	0.0126953	0.0158691	0.0129395			7.6	0.001781	0.0026538	-0.00011841			7.6	0.0041	0.0036865			7.6	0.00013672	0.00016846	0.00016235			7.6	6.1035e-06	3.6621e-06				7.6	0.00646973	0.00544434	0.00556641
		7.7	0.0126221	0.0158691	0.0129761			7.7	0.0017896	0.0026636	-0.00011963			7.7	0.00411	0.0037329			7.7	0.00013794	0.00016724	0.00016357			7.7	3.6621e-06	4.8828e-06				7.7	0.00645752	0.00541992	0.00557861
		7.8	0.012561	0.0159058	0.0128418			7.8	0.0017651	0.0026685	-0.00011963			7.8	0.0041	0.0037476			7.8	0.00013794	0.00016968	0.00016235			7.8	4.8828e-06	6.1035e-06				7.8	0.00645752	0.00540771	0.00559082
		7.9	0.0125732	0.015918	0.0130249			7.9	0.0017883	0.0026611	-0.00011963			7.9	0.00411	0.0038184			7.9	0.00013794	0.00016846	0.00016357			7.9	6.1035e-06	7.3242e-06				7.9	0.00648193	0.00539551	0.00557861
		8	0.0125854	0.0158936	0.0129272			8	0.0017932	0.002644	-0.00012085			8	0.00412	0.0038647			8	0.00013794	0.00016724	0.00016479			8	7.3242e-06	3.6621e-06				8	0.00644531	0.00540771	0.00559082
		8.1	0.0126099	0.015979	0.0128784			8.1	0.0017871	0.0026685	-0.00012085			8.1	0.00411	0.0038843			8.1	0.00013916	0.00016602	0.00016602			8.1	6.1035e-06	6.1035e-06				8.1	0.00645752	0.00541992	0.00557861
		8.2	0.0126099	0.0159546	0.0130005			8.2	0.0017981	0.0026685	-0.00012085			8.2	0.0041	0.0039172			8.2	0.00013916	0.00016724	0.00016724			8.2	6.1035e-06	4.8828e-06				8.2	0.00644531	0.00541992	0.00554199
		8.3	0.012561	0.0159424	0.0129395			8.3	0.0017786	0.0026611	-0.00011963			8.3	0.0041	0.0039417			8.3	0.00013916	0.00016602	0.00016357			8.3	6.1035e-06	6.1035e-06				8.3	0.00644531	0.00543213	0.00556641
		8.4	0.0125244	0.0159302	0.0129395			8.4	0.0017456	0.0026624	-0.00011963			8.4	0.00409	0.0039514			8.4	0.00013916	0.00016724	0.00016479			8.4	6.1035e-06	6.1035e-06				8.4	0.00646973	0.00541992	0.00557861
		8.5	0.0126465	0.0159424	0.0129883			8.5	0.0017688	0.0026697	-0.00011963			8.5	0.0041	0.0040088			8.5	0.00013916	0.00016724	0.00016602			8.5	6.1035e-06	4.8828e-06				8.5	0.00644531	0.00540771	0.00559082
		8.6	0.0127197	0.015918	0.0129639			8.6	0.0017883	0.0026563	-0.00012085			8.6	0.00412	0.0040417			8.6	0.00014038	0.00016724	0.00016846			8.6	7.3242e-06	7.3242e-06				8.6	0.0064209	0.00541992	0.00559082
		8.7	0.0127197	0.0159912	0.0130737			8.7	0.0017896	0.0026477	-0.00011963			8.7	0.00411	0.0040808			8.7	0.00013794	0.00016724	0.00016479			8.7	4.8828e-06	6.1035e-06				8.7	0.00645752	0.00543213	0.00560303
		8.8	0.0126953	0.0160034	0.0130493			8.8	0.001792	0.0026636	-0.00012085			8.8	0.00411	0.0040979			8.8	0.00013794	0.00016724	0.00016602			8.8	7.3242e-06	7.3242e-06				8.8	0.00648193	0.00543213	0.00557861
		8.9	0.0126465	0.0160034	0.0130493			8.9	0.0017944	0.0026648	-0.00012085			8.9	0.00412	0.0041199			8.9	0.00013794	0.00016724	0.00016724			8.9	7.3242e-06	7.3242e-06				8.9	0.00648193	0.00541992	0.00560303
		9	0.0125977	0.0160278	0.0130615			9	0.0017847	0.0026599	-0.00011963			9	0.0041	0.0041235			9	0.00013794	0.00016724	0.00021851			9	4.8828e-06	7.3242e-06				9	0.00644531	0.00540771	0.00562744
		9.1	0.0126587	0.0160522	0.0131592			9.1	0.0017664	0.0026611	-0.00012085			9.1	0.00413	0.0041248			9.1	0.00013916	0.00016846	0.00021729			9.1	7.3242e-06	1.0986e-05				9.1	0.00648193	0.00541992	0.00562744
		9.2	0.0126831	0.0160645	0.0131714			9.2	0.0017957	0.0026501	-0.00011963			9.2	0.00411	0.0041577			9.2	0.00013916	0.00016846	0.00018921			9.2	4.8828e-06	7.3242e-06				9.2	0.00648193	0.00541992	0.00562744
		9.3	0.0127075	0.0160034	0.0130981			9.3	0.001781	0.0026489	-0.00012085			9.3	0.00417	0.0041846			9.3	0.00013916	0.00016724	0.00018311			9.3	6.1035e-06	1.0986e-05				9.3	0.00649414	0.00545654	0.00562744
		9.4	0.0127686	0.0160889	0.0130737			9.4	0.0017834	0.0026599	-0.00012085			9.4	0.00432	0.0042102			9.4	0.00013916	0.00016602	0.00017944			9.4	4.8828e-06	9.7656e-06				9.4	0.00646973	0.00545654	0.00560303
		9.5	0.0127319	0.0160889	0.0131226			9.5	0.0017847	0.0026575	-0.00011963			9.5	0.0045	0.0042249			9.5	0.00013916	0.00016724	0.00017578			9.5	7.3242e-06	1.2207e-05				9.5	0.00648193	0.00543213	0.00562744
		9.6	0.0127319	0.0160889	0.0132202			9.6	0.0017786	0.0026563	-0.00011963			9.6	0.00461	0.0042322			9.6	0.00013916	0.00016724	0.00016724			9.6	6.1035e-06	1.5869e-05				9.6	0.00650635	0.00543213	0.00566406
		9.7	0.0126343	0.0160767	0.0133423			9.7	0.0017627	0.002655	-0.00011963			9.7	0.00459	0.0042358			9.7	0.00013794	0.00016602	0.00016479			9.7	7.3242e-06	1.5869e-05				9.7	0.00648193	0.00545654	0.00567627
		9.8	0.0127319	0.0160889	0.0134155			9.8	0.0017908	0.0026563	-0.00011963			9.8	0.00464	0.0042505			9.8	0.00014038	0.00016724	0.00016479			9.8	9.7656e-06	1.4648e-05				9.8	0.00648193	0.00544434	0.00571289
		9.9	0.0127075	0.0160278	0.0134766			9.9	0.0017847	0.0026392	-0.00012085			9.9	0.00469	0.0042725			9.9	0.00013794	0.00016724	0.00016602			9.9	8.5449e-06	1.5869e-05				9.9	0.00646973	0.00544434	0.00574951
		10	0.0127319	0.0161133	0.013501			10	0.0017944	0.0026477	-0.00012085			10	0.00473	0.0042859			10	0.00013794	0.00016846	0.00016602			10	8.5449e-06	1.5869e-05				10	0.00649414	0.00543213	0.0057373
		10.1	0.0127563	0.0161255	0.0135742			10.1	0.0017847	0.0026514	-0.00012085			10.1	0.00477	0.0042981			10.1	0.00013794	0.00016724	0.00016602			10.1	7.3242e-06	1.709e-05				10.1	0.00650635	0.00541992	0.0057251
		10.2	0.0127563	0.0160889	0.0137939			10.2	0.0017847	0.0026453	-0.00011963			10.2	0.00479	0.0043127			10.2	0.00013916	0.00016724	0.00016602			10.2	6.1035e-06	2.0752e-05				10.2	0.00650635	0.00543213	0.00576172
		10.3	0.0128052	0.0161133	0.0137451			10.3	0.0017749	0.0026465	-0.00011963			10.3	0.00482	0.004314			10.3	0.00014038	0.00016846	0.00016724			10.3	6.1035e-06	1.9531e-05				10.3	0.00648193	0.00541992	0.00577393
		10.4	0.0129272	0.0161255	0.0138062			10.4	0.0017834	0.0026563	-0.00011963			10.4	0.00487	0.0043567			10.4	0.00013916	0.00016846	0.00016724			10.4	7.3242e-06	1.9531e-05				10.4	0.00646973	0.00541992	0.00578613
		10.5	0.0129761	0.0161377	0.013916			10.5	0.0017981	0.0026343	-0.00011841			10.5	0.00491	0.0043701			10.5	0.00013916	0.00016846	0.00016602			10.5	7.3242e-06	1.9531e-05				10.5	0.00648193	0.00544434	0.00581055
		10.6	0.0129761	0.0161743	0.013855			10.6	0.0017944	0.002644	-0.00011963			10.6	0.00494	0.0043787			10.6	0.00013916	0.00016846	0.00016724			10.6	7.3242e-06	2.3193e-05				10.6	0.00649414	0.00544434	0.00581055
		10.7	0.0129639	0.0161987	0.013916			10.7	0.0017944	0.0026501	-0.00012085			10.7	0.00499	0.0043848			10.7	0.00013916	0.00016846	0.00016724			10.7	9.7656e-06	2.4414e-05				10.7	0.00649414	0.00545654	0.00578613
		10.8	0.0129395	0.0162231	0.0139282			10.8	0.001792	0.0026489	-0.00012207			10.8	0.00502	0.0043811			10.8	0.00013916	0.00016724	0.00016602			10.8	8.5449e-06	2.4414e-05				10.8	0.00648193	0.00544434	0.00579834
		10.9	0.0128296	0.016272	0.0139404			10.9	0.0017908	0.0026538	-0.00012085			10.9	0.00505	0.0043884			10.9	0.00013916	0.00016724	0.00016724			10.9	1.2207e-05	2.4414e-05				10.9	0.00649414	0.00545654	0.00581055
		11	0.0128784	0.0162354	0.0140381			11	0.0017798	0.0026575	-0.00012085			11	0.00512	0.0044055			11	0.00013794	0.00016602	0.00016846			11	7.3242e-06	2.5635e-05				11	0.00649414	0.00544434	0.00582275
		11.1	0.0128418	0.0161743	0.0140869			11.1	0.0017969	0.002644	-0.00012085			11.1	0.00518	0.0044202			11.1	0.00013794	0.00016602	0.00016724			11.1	7.3242e-06	2.9297e-05				11.1	0.00648193	0.00543213	0.00583496
		11.2	0.0128296	0.0161011	0.0141113			11.2	0.0018213	0.0026306	-0.00012085			11.2	0.00521	0.0044275			11.2	0.00014038	0.00016846	0.00016724			11.2	7.3242e-06	2.9297e-05				11.2	0.00649414	0.00544434	0.00584717
		11.3	0.0128296	0.0162109	0.0141602			11.3	0.0017957	0.0026282	-0.00012085			11.3	0.00525	0.0044336			11.3	0.00013916	0.00016846	0.00016602			11.3	7.3242e-06	3.1738e-05				11.3	0.00650635	0.00544434	0.00582275
		11.4	0.0127808	0.0161987	0.0141724			11.4	0.001792	0.0026355	-0.00011963			11.4	0.00527	0.0044373			11.4	0.00013794	0.00016846	0.00016602			11.4	7.3242e-06	3.2959e-05				11.4	0.00651855	0.00544434	0.00584717
		11.5	0.0127686	0.0161621	0.0141724			11.5	0.0018079	0.0026367	-0.00011963			11.5	0.0053	0.0044324			11.5	0.00013916	0.00016846	0.00016602			11.5	7.3242e-06	3.54e-05				11.5	0.00649414	0.00545654	0.00584717
		11.6	0.0127563	0.0162231	0.0142456			11.6	0.0017822	0.0026392	-0.00011963			11.6	0.00532	0.0044385			11.6	0.00013916	0.00016846	0.00016724			11.6	7.3242e-06	3.54e-05				11.6	0.00649414	0.00544434	0.00588379
		11.7	0.0128296	0.0162598	0.0142822			11.7	0.0017896	0.0026392	-0.00011963			11.7	0.00534	0.004458			11.7	0.00013916	0.00016724	0.00016602			11.7	6.1035e-06	3.9063e-05				11.7	0.00648193	0.00541992	0.0059082
		11.8	0.0128296	0.0162598	0.0143311			11.8	0.0018018	0.0026172	-0.00011963			11.8	0.00537	0.0044763			11.8	0.00013794	0.00016968	0.00016602			11.8	8.5449e-06	3.7842e-05				11.8	0.00648193	0.00545654	0.00595703
		11.9	0.012854	0.016333	0.0143555			11.9	0.0017981	0.0026416	-0.00012085			11.9	0.00539	0.0044873			11.9	0.00013916	0.00016846	0.00016602			11.9	6.1035e-06	4.1504e-05				11.9	0.00649414	0.00546875	0.00595703
		12	0.0128906	0.0163208	0.0143799			12	0.0018079	0.0026392	-0.00012085			12	0.00542	0.0044971			12	0.00013916	0.00016724	0.00016602			12	7.3242e-06	4.0283e-05				12	0.00648193	0.00545654	0.00593262
		12.1	0.0129395	0.0163086	0.0143311			12.1	0.0018164	0.0026392	-0.00011963			12.1	0.00545	0.0045068			12.1	0.00014038	0.00016846	0.00016602			12.1	7.3242e-06	4.2725e-05				12.1	0.00649414	0.00546875	0.00596924
		12.2	0.0129395	0.0162964	0.0143921			12.2	0.0017786	0.0026392	-0.00012085			12.2	0.00545	0.0044922			12.2	0.00013916	0.00016602	0.00016602			12.2	8.5449e-06	4.0283e-05				12.2	0.00650635	0.00545654	0.00595703
		12.3	0.0130615	0.0163208	0.0144531			12.3	0.0017944	0.0026404	-0.00011963			12.3	0.00548	0.0045105			12.3	0.00013916	0.00016724	0.00016602			12.3	8.5449e-06	4.5166e-05				12.3	0.00648193	0.00544434	0.00596924
		12.4	0.0131348	0.0162842	0.0144409			12.4	0.0017981	0.0026257	-0.00012085			12.4	0.0055	0.0045166			12.4	0.00013916	0.00016724	0.00016602			12.4	8.5449e-06	4.5166e-05				12.4	0.00650635	0.00543213	0.00596924
		12.5	0.0131592	0.0162964	0.0145264			12.5	0.0018091	0.0026343	-0.00011963			12.5	0.00551	0.0045178			12.5	0.00014038	0.00016724	0.00016846			12.5	8.5449e-06	4.5166e-05				12.5	0.00649414	0.00545654	0.00596924
		12.6	0.0132446	0.0162964	0.014502			12.6	0.0018127	0.0026294	-0.00011963			12.6	0.00552	0.0045215			12.6	0.00014038	0.00016724	0.00016724			12.6	7.3242e-06	4.6387e-05				12.6	0.00650635	0.00543213	0.00593262
		12.7	0.0133545	0.0162842	0.014502			12.7	0.0018054	0.0026404	-0.00012085			12.7	0.00553	0.0045215			12.7	0.00013916	0.00016846	0.00016724			12.7	7.3242e-06	4.7607e-05				12.7	0.00649414	0.00544434	0.00595703
		12.8	0.0133545	0.0163086	0.0144775			12.8	0.0017944	0.0026306	-0.00011963			12.8	0.00554	0.0045239			12.8	0.00013916	0.00016724	0.00016724			12.8	6.1035e-06	5.127e-05				12.8	0.00648193	0.00544434	0.00596924
		12.9	0.0133911	0.0162964	0.0145142			12.9	0.001803	0.0026331	-0.00011963			12.9	0.00557	0.0045313			12.9	0.00014038	0.00016724	0.00016602			12.9	8.5449e-06	5.127e-05				12.9	0.00644531	0.00543213	0.00596924
		13	0.0134155	0.0162476	0.0144897			13	0.0018298	0.0026245	-0.00011963			13	0.00561	0.0045435			13	0.00014038	0.00016968	0.00016724			13	6.1035e-06	5.127e-05				13	0.00646973	0.00541992	0.00600586
		13.1	0.0134155	0.0162354	0.0145142			13.1	0.0018164	0.0026306	-0.00011963			13.1	0.00562	0.0045459			13.1	0.00013916	0.00016846	0.00016602			13.1	9.7656e-06	5.4932e-05				13.1	0.00649414	0.00545654	0.00600586
		13.2	0.0133545	0.016272	0.014563			13.2	0.0018152	0.0026501	-0.00011963			13.2	0.00564	0.0045508			13.2	0.00014038	0.00016724	0.00016724			13.2	7.3242e-06	5.7373e-05				13.2	0.00646973	0.00544434	0.00598145
		13.3	0.0134644	0.0162598	0.0145508			13.3	0.0018176	0.0026379	-0.00011963			13.3	0.00565	0.0045618			13.3	0.00013916	0.00016968	0.00016724			13.3	7.3242e-06	5.3711e-05				13.3	0.00646973	0.00544434	0.00603027
		13.4	0.0135254	0.0163086	0.0145752			13.4	0.0017993	0.0026343	-0.00012085			13.4	0.00566	0.0045435			13.4	0.00014038	0.00016846	0.00016479			13.4	7.3242e-06	5.4932e-05				13.4	0.00644531	0.00545654	0.00604248
		13.5	0.0135742	0.0163086	0.0146729			13.5	0.0017883	0.0026294	-0.00012085			13.5	0.00566	0.0045459			13.5	0.00013916	0.00016846	0.00016602			13.5	9.7656e-06	5.6152e-05				13.5	0.00644531	0.00546875	0.00605469
		13.6	0.0136597	0.0163086	0.0145996			13.6	0.0018103	0.0026367	-0.00011963			13.6	0.00569	0.0045557			13.6	0.00014038	0.00016724	0.00016479			13.6	8.5449e-06	5.7373e-05				13.6	0.00646973	0.00544434	0.00604248
		13.7	0.0137207	0.0162842	0.0146484			13.7	0.0018152	0.0026086	-0.00011963			13.7	0.0057	0.004563			13.7	0.00013916	0.00016846	0.00016357			13.7	1.0986e-05	5.7373e-05				13.7	0.00646973	0.00544434	0.00605469
		13.8	0.0137817	0.0163818	0.014624			13.8	0.001814	0.0026379	-0.00012207			13.8	0.00571	0.004563			13.8	0.00014038	0.00016968	0.00016357			13.8	9.7656e-06	5.9814e-05				13.8	0.00649414	0.00544434	0.00606689
		13.9	0.0138184	0.016333	0.0146484			13.9	0.0018042	0.0026501	-0.00012085			13.9	0.00572	0.0045679			13.9	0.00014038	0.00016846	0.00016357			13.9	1.3428e-05	5.9814e-05				13.9	0.00651855	0.00545654	0.00605469
		14	0.0138062	0.0163086	0.0146118			14	0.0017908	0.0026489	-0.00011963			14	0.00574	0.0045728			14	0.00014038	0.00016846	0.00016113			14	1.0986e-05	5.8594e-05				14	0.00649414	0.00546875	0.00605469
		14.1	0.0137695	0.0163086	0.014624			14.1	0.0018005	0.0026245	-0.00011963			14.1	0.00573	0.0045569			14.1	0.00013916	0.00016724	0.00016357			14.1	1.3428e-05	6.1035e-05				14.1	0.00655518	0.00545654	0.00605469
		14.2	0.0139282	0.0163208	0.014624			14.2	0.0017908	0.0026294	-0.00012085			14.2	0.00575	0.0045789			14.2	0.00013794	0.00016724	0.00016479			14.2	1.3428e-05	6.2256e-05				14.2	0.00655518	0.00544434	0.00606689
		14.3	0.0138672	0.016394	0.0146729			14.3	0.0017786	0.0026135	-0.00012085			14.3	0.00575	0.0045813			14.3	0.00014038	0.00016846	0.00016479			14.3	1.3428e-05	6.1035e-05				14.3	0.00655518	0.00543213	0.0060791
		14.4	0.0139038	0.0164063	0.0146729			14.4	0.0018054	0.0026355	-0.00012085			14.4	0.00577	0.0045874			14.4	0.00013916	0.00016724	0.00016602			14.4	1.4648e-05	6.4697e-05				14.4	0.00656738	0.00544434	0.0060791
		14.5	0.0139282	0.0163818	0.0146851			14.5	0.0018127	0.0026477	-0.00011963			14.5	0.00578	0.0045862			14.5	0.00013916	0.00016846	0.00016724			14.5	1.8311e-05	6.4697e-05				14.5	0.00654297	0.00544434	0.0060791
		14.6	0.0140015	0.0163574	0.0146851			14.6	0.0017896	0.0026453	-0.00012207			14.6	0.0058	0.0045911			14.6	0.00014038	0.00016846	0.00016602			14.6	1.8311e-05	6.3477e-05				14.6	0.00655518	0.00544434	0.00609131
		14.7	0.0139771	0.0163574	0.0146118			14.7	0.0017786	0.0026343	-0.00012085			14.7	0.00579	0.0045667			14.7	0.00013916	0.00016846	0.00016479			14.7	1.5869e-05	6.4697e-05				14.7	0.00655518	0.00545654	0.00610352
		14.8	0.0139771	0.0163574	0.0147339			14.8	0.0017847	0.002644	-0.00012085			14.8	0.00579	0.0045776			14.8	0.00013916	0.00016968	0.00016724			14.8	1.8311e-05	6.4697e-05				14.8	0.00657959	0.00545654	0.00610352
		14.9	0.0140137	0.016333	0.0147217			14.9	0.0018066	0.0026379	-0.00011963			14.9	0.0058	0.0045947			14.9	0.00013916	0.00016846	0.00016846			14.9	1.5869e-05	6.5918e-05				14.9	0.00662842	0.00544434	0.00612793
		15	0.0140259	0.0163452	0.0148193			15	0.0018018	0.0026282	-0.00012085			15	0.00579	0.0045874			15	0.00013916	0.00016724	0.00016846			15	2.0752e-05	6.7139e-05				15	0.00664063	0.00546875	0.00612793
		15.1	0.0140381	0.016394	0.0147339			15.1	0.0017993	0.0026465	-0.00012085			15.1	0.0058	0.0045874			15.1	0.00014038	0.00016846	0.00016968			15.1	1.9531e-05	6.5918e-05				15.1	0.00666504	0.00548096	0.00612793
		15.2	0.0141357	0.0163452	0.0147339			15.2	0.001759	0.0026599	-0.00011963			15.2	0.00581	0.004585			15.2	0.00014038	0.00016846	0.00016846			15.2	2.0752e-05	6.7139e-05				15.2	0.00667725	0.00546875	0.00614014
		15.3	0.0140625	0.0163086	0.0147827			15.3	0.0017834	0.002644	-0.00011963			15.3	0.0058	0.004585			15.3	0.00014038	0.00016846	0.00016724			15.3	2.0752e-05	6.958e-05				15.3	0.00667725	0.00545654	0.00614014
		15.4	0.0142212	0.016394	0.0147705			15.4	0.0017761	0.0026538	-0.00011963			15.4	0.00578	0.0045898			15.4	0.00013916	0.00016724	0.00016724			15.4	2.0752e-05	7.0801e-05				15.4	0.00665283	0.00546875	0.00612793
		15.5	0.014209	0.0163452	0.0147583			15.5	0.0017981	0.0026465	-0.00011963			15.5	0.00581	0.0045947			15.5	0.00014038	0.00016846	0.00016724			15.5	2.5635e-05	6.958e-05				15.5	0.00672607	0.00544434	0.00610352
		15.6	0.0141846	0.016272	0.0147705			15.6	0.0018066	0.0026245	-0.00011963			15.6	0.00581	0.0046094			15.6	0.00014038	0.00016724	0.00016724			15.6	2.3193e-05	7.2021e-05				15.6	0.00670166	0.00545654	0.00611572
		15.7	0.0143677	0.0163696	0.0147827			15.7	0.0018127	0.0026453	-0.00012085			15.7	0.00584	0.0046265			15.7	0.00014038	0.00016724	0.00016724			15.7	2.0752e-05	7.2021e-05				15.7	0.00670166	0.00543213	0.00614014
		15.8	0.0144775	0.0163574	0.0148193			15.8	0.0018127	0.0026379	-0.00012085			15.8	0.00584	0.0046265			15.8	0.00013916	0.00016846	0.00016724			15.8	2.3193e-05	7.2021e-05				15.8	0.00671387	0.00541992	0.00615234
		15.9	0.0143555	0.0163818	0.0147339			15.9	0.0018018	0.0026514	-0.00011963			15.9	0.00583	0.0046216			15.9	0.00014038	0.00016724	0.00016724			15.9	2.3193e-05	7.4463e-05				15.9	0.00672607	0.00545654	0.00614014
		16	0.0143555	0.0163696	0.0148438			16	0.0017688	0.0026477	-0.00011963			16	0.00582	0.0046118			16	0.00014038	0.00016846	0.00016846			16	2.5635e-05	7.2021e-05				16	0.00671387	0.00545654	0.00616455
		16.1	0.0143921	0.0164063	0.0149536			16.1	0.0017932	0.0026343	-0.00011963			16.1	0.00582	0.0046326			16.1	0.00014038	0.00016968	0.00016846			16.1	2.6855e-05	7.4463e-05				16.1	0.00673828	0.00541992	0.00617676
		16.2	0.0143066	0.0163574	0.0150879			16.2	0.0018005	0.0026099	-0.00011963			16.2	0.00581	0.0046448			16.2	0.00013916	0.00016846	0.00016846			16.2	2.4414e-05	7.3242e-05				16.2	0.0067627	0.00541992	0.00616455
		16.3	0.0143555	0.0163574	0.014917			16.3	0.0017993	0.0026208	-0.00011963			16.3	0.00582	0.0046497			16.3	0.00013916	0.00016846	0.00016724			16.3	2.5635e-05	7.5684e-05				16.3	0.00675049	0.00544434	0.00616455
		16.4	0.0143921	0.0164063	0.0148926			16.4	0.001803	0.002616	-0.00011963			16.4	0.00581	0.0046692			16.4	0.00014038	0.00016724	0.00016846			16.4	2.5635e-05	7.6904e-05				16.4	0.0067749	0.00544434	0.00616455
		16.5	0.0143799	0.0164307	0.0148315			16.5	0.0017957	0.0026184	-0.00011963			16.5	0.00582	0.0046692			16.5	0.0001416	0.00016846	0.00016846			16.5	2.6855e-05	7.8125e-05				16.5	0.00678711	0.00546875	0.00616455
		16.6	0.0142822	0.0164429	0.014856			16.6	0.0018103	0.0026111	-0.00012207			16.6	0.00582	0.0046338			16.6	0.00013916	0.00016846	0.00016846			16.6	2.9297e-05	7.5684e-05				16.6	0.00678711	0.00545654	0.00617676
		16.7	0.0143188	0.0164063	0.0149292			16.7	0.001781	0.0026184	-0.00012085			16.7	0.00582	0.0046301			16.7	0.00014038	0.00016846	0.00016724			16.7	2.6855e-05	7.6904e-05				16.7	0.00679932	0.00544434	0.00617676
		16.8	0.0143066	0.0163696	0.0148804			16.8	0.0017761	0.0026111	-0.00011963			16.8	0.00583	0.004624			16.8	0.00013916	0.00016724	0.00016724			16.8	2.6855e-05	7.5684e-05				16.8	0.00682373	0.00544434	0.00615234
		16.9	0.0143921	0.0164551	0.0148438			16.9	0.0018005	0.0026086	-0.00011963			16.9	0.00582	0.004624			16.9	0.00013916	0.00016846	0.00016846			16.9	2.9297e-05	7.5684e-05				16.9	0.00683594	0.00545654	0.00616455
		17	0.0144165	0.0164185	0.0148926			17	0.0017993	0.0026184	-0.00012085			17	0.00583	0.0046143			17	0.00014038	0.00016846	0.00016724			17	2.8076e-05	7.6904e-05				17	0.00683594	0.00544434	0.00615234
		17.1	0.0144531	0.0163696	0.0148315			17.1	0.0017969	0.0026123	-0.00012085			17.1	0.00582	0.0046265			17.1	0.00013916	0.00016846	0.00016602			17.1	3.1738e-05	7.8125e-05				17.1	0.00687256	0.00543213	0.00618896
		17.2	0.0144531	0.016394	0.0148071			17.2	0.0017908	0.0026086	-0.00012085			17.2	0.00583	0.0046387			17.2	0.00013916	0.00016602	0.00016846			17.2	3.2959e-05	7.9346e-05				17.2	0.00686035	0.00545654	0.00620117
		17.3	0.0145264	0.0164185	0.0148682			17.3	0.0017834	0.0026306	-0.00012085			17.3	0.00583	0.0046301			17.3	0.00013916	0.00016724	0.00016846			17.3	3.2959e-05	7.8125e-05				17.3	0.00688477	0.00544434	0.00621338
		17.4	0.0145508	0.0164307	0.0148193			17.4	0.0018018	0.0026404	-0.00011963			17.4	0.00586	0.004646			17.4	0.00013916	0.00016968	0.00016846			17.4	3.418e-05	7.9346e-05				17.4	0.00687256	0.00544434	0.00622559
		17.5	0.014502	0.0163574	0.014917			17.5	0.0017871	0.0026172	-0.00011963			17.5	0.00589	0.0046497			17.5	0.00014038	0.00016846	0.00016724			17.5	3.54e-05	7.8125e-05				17.5	0.00687256	0.00545654	0.00622559
		17.6	0.0145142	0.0164307	0.0148804			17.6	0.0018054	0.0026428	-0.00012085			17.6	0.00588	0.004657			17.6	0.00013916	0.00016846	0.00016846			17.6	3.7842e-05	8.0566e-05				17.6	0.00688477	0.00545654	0.00620117
		17.7	0.0145386	0.0164063	0.0148315			17.7	0.001792	0.0026318	-0.00011963			17.7	0.00583	0.0046521			17.7	0.00014038	0.00016846	0.00016724			17.7	3.2959e-05	8.0566e-05				17.7	0.00692139	0.00544434	0.00621338
		17.8	0.0145142	0.0163696	0.0148071			17.8	0.0017993	0.0026416	-0.00012085			17.8	0.00584	0.0046521			17.8	0.00013916	0.00016846	0.00016846			17.8	4.0283e-05	8.0566e-05				17.8	0.00689697	0.00544434	0.00622559
		17.9	0.0145508	0.0164307	0.014917			17.9	0.0017664	0.0026294	-0.00012085			17.9	0.00584	0.0046252			17.9	0.00013916	0.00016968	0.00016846			17.9	3.9063e-05	8.1787e-05				17.9	0.00693359	0.00546875	0.00625
		18	0.0145142	0.0164307	0.0148315			18	0.0017761	0.0026294	-0.00012085			18	0.00584	0.0046655			18	0.00013916	0.00016724	0.00016724			18	4.0283e-05	8.3008e-05				18	0.00695801	0.00545654	0.00626221
		18.1	0.0145874	0.0163818	0.0147949			18.1	0.0018091	0.0026245	-0.00011963			18.1	0.00584	0.0046655			18.1	0.00014038	0.00016846	0.00016724			18.1	3.9063e-05	8.5449e-05				18.1	0.00695801	0.00546875	0.00627441
		18.2	0.014624	0.0164429	0.0149536			18.2	0.0017871	0.0026282	-0.00011841			18.2	0.00586	0.0046729			18.2	0.00014038	0.00016968	0.00016968			18.2	4.1504e-05	8.3008e-05				18.2	0.00695801	0.00546875	0.00627441
		18.3	0.0146118	0.0164795	0.014978			18.3	0.0018018	0.0026343	-0.00011963			18.3	0.00586	0.0046814			18.3	0.00014038	0.00016846	0.0001709			18.3	4.2725e-05	8.4229e-05				18.3	0.0069458	0.00545654	0.00628662
		18.4	0.0146118	0.0164795	0.014917			18.4	0.0017834	0.0026355	-0.00011963			18.4	0.00588	0.004679			18.4	0.00014038	0.00016724	0.00016846			18.4	4.3945e-05	8.3008e-05				18.4	0.00692139	0.00545654	0.00632324
		18.5	0.0146362	0.0165039	0.0150146			18.5	0.0017798	0.0026306	-0.00011963			18.5	0.00587	0.0046521			18.5	0.00014038	0.00016724	0.00016846			18.5	4.5166e-05	8.3008e-05				18.5	0.00689697	0.00546875	0.00631104
		18.6	0.0146484	0.0164795	0.0150146			18.6	0.001792	0.0026257	-0.00011963			18.6	0.00587	0.0046643			18.6	0.00013916	0.00016846	0.00016846			18.6	4.6387e-05	8.3008e-05				18.6	0.00693359	0.00544434	0.00628662
		18.7	0.0146118	0.0164673	0.0148682			18.7	0.0017834	0.002616	-0.00011963			18.7	0.00589	0.0046838			18.7	0.00014038	0.00016846	0.00016846			18.7	4.5166e-05	8.4229e-05				18.7	0.00695801	0.00540771	0.00628662
		18.8	0.0146362	0.0164551	0.014917			18.8	0.0018005	0.0026257	-0.00012085			18.8	0.00589	0.004679			18.8	0.0001416	0.00016724	0.00016846			18.8	4.8828e-05	8.3008e-05				18.8	0.0069458	0.00544434	0.00628662
		18.9	0.0146729	0.0164307	0.0149536			18.9	0.001792	0.0026343	-0.00012207			18.9	0.00583	0.0046716			18.9	0.00014038	0.00016846	0.00016968			18.9	4.7607e-05	8.7891e-05				18.9	0.0069458	0.00545654	0.00625
		19	0.0146851	0.0164429	0.014856			19	0.001781	0.0026306	-0.00012207			19	0.00582	0.0046692			19	0.00014038	0.00016846	0.00016846			19	5.127e-05	8.667e-05				19	0.00698242	0.00546875	0.00628662
		19.1	0.0146729	0.0164307	0.014917			19.1	0.0018005	0.0026257	-0.00011963			19.1	0.00583	0.0046692			19.1	0.00014038	0.00016968	0.00016846			19.1	5.127e-05	8.7891e-05				19.1	0.0069458	0.00544434	0.00626221
		19.2	0.0147461	0.0164063	0.0149902			19.2	0.0017676	0.0026245	-0.00011841			19.2	0.00583	0.0046606			19.2	0.00014038	0.00016846	0.00016724			19.2	5.3711e-05	8.667e-05				19.2	0.00698242	0.00544434	0.00629883
		19.3	0.0146973	0.0163696	0.0149902			19.3	0.0017932	0.0026245	-0.00011963			19.3	0.00584	0.0046716			19.3	0.00013916	0.00016846	0.00016846			19.3	5.249e-05	8.9111e-05				19.3	0.00698242	0.00541992	0.00631104
		19.4	0.0146606	0.0163818	0.0147949			19.4	0.001803	0.0026025	-0.00012085			19.4	0.00584	0.0046753			19.4	0.00013916	0.00016846	0.00016724			19.4	5.3711e-05	8.7891e-05				19.4	0.00699463	0.00543213	0.00629883
		19.5	0.0146729	0.0164307	0.0146484			19.5	0.0017737	0.0026147	-0.00012085			19.5	0.00583	0.004679			19.5	0.00013916	0.00016846	0.00016846			19.5	5.4932e-05	8.9111e-05				19.5	0.00700684	0.00543213	0.00627441
		19.6	0.0146484	0.0164063	0.0147217			19.6	0.0017981	0.0026196	-0.00012085			19.6	0.00583	0.0046863			19.6	0.00014038	0.00016846	0.00016846			19.6	5.6152e-05	8.9111e-05				19.6	0.00700684	0.00544434	0.00629883
		19.7	0.014624	0.016394	0.0145874			19.7	0.0017798	0.0026318	-0.00012085			19.7	0.00582	0.0046863			19.7	0.00014038	0.00016724	0.00016724			19.7	5.6152e-05	9.1553e-05				19.7	0.00698242	0.00544434	0.00631104
		19.8	0.0146118	0.0163818	0.0147217			19.8	0.0017786	0.0026294	-0.00012085			19.8	0.00579	0.0046765			19.8	0.00013916	0.00016724	0.00016724			19.8	5.6152e-05	9.0332e-05				19.8	0.00700684	0.00544434	0.00631104
		19.9	0.0146362	0.0163818	0.0149292			19.9	0.0017993	0.0026233	-0.00012085			19.9	0.00581	0.0046716			19.9	0.00014038	0.00016846	0.00016724			19.9	5.8594e-05	9.0332e-05				19.9	0.00703125	0.00544434	0.00632324
		20	0.014624	0.0163086	0.0149292			20	0.0017993	0.0026099	-0.00012085			20	0.0058	0.0046912			20	0.00014038	0.00016846	0.00016846			20	5.9814e-05	9.1553e-05				20	0.00700684	0.00544434	0.00633545
		20.1	0.0147095	0.0164429	0.0147583			20.1	0.0017944	0.0026062	-0.00012085			20.1	0.0058	0.0046899			20.1	0.00014038	0.00016724	0.00016846			20.1	6.1035e-05	9.2773e-05				20.1	0.00701904	0.00544434	0.00632324
		20.2	0.0146362	0.0165039	0.0149658			20.2	0.0017773	0.0026184	-0.00011963			20.2	0.0058	0.0046838			20.2	0.00014038	0.00016724	0.00016968			20.2	5.9814e-05	8.9111e-05				20.2	0.00701904	0.00548096	0.00628662
		20.3	0.0145996	0.0164429	0.0148926			20.3	0.0018042	0.002627	-0.00012085			20.3	0.0058	0.0046826			20.3	0.00014038	0.00016724	0.00016846			20.3	6.2256e-05	9.2773e-05				20.3	0.00701904	0.00548096	0.00631104
		20.4	0.0146973	0.0164551	0.0149902			20.4	0.0017786	0.0026208	-0.00011963			20.4	0.00581	0.0046704			20.4	0.00014038	0.00016846	0.00016846			20.4	6.4697e-05	9.1553e-05				20.4	0.00704346	0.00545654	0.00632324
		20.5	0.0147461	0.0164307	0.0150146			20.5	0.0017798	0.0026135	-0.00011963			20.5	0.00583	0.0046753			20.5	0.0001416	0.00016846	0.00016846			20.5	6.3477e-05	9.2773e-05				20.5	0.00704346	0.00544434	0.00633545
		20.6	0.0146851	0.0163818	0.0150513			20.6	0.0017883	0.0026074	-0.00012085			20.6	0.00584	0.004679			20.6	0.00014038	0.00016846	0.00016968			20.6	6.5918e-05	9.2773e-05				20.6	0.00705566	0.00544434	0.00632324
		20.7	0.0146973	0.0164795	0.014917			20.7	0.0017712	0.0026001	-0.00012085			20.7	0.00583	0.0046729			20.7	0.00014038	0.00016846	0.00016846			20.7	6.3477e-05	9.2773e-05				20.7	0.00705566	0.00544434	0.00637207
		20.8	0.0147339	0.0164795	0.0149048			20.8	0.0018091	0.0026111	-0.00012085			20.8	0.00583	0.0046777			20.8	0.00014038	0.00016846	0.00016968			20.8	6.4697e-05	9.3994e-05				20.8	0.00704346	0.00544434	0.00632324
		20.9	0.0147461	0.0165039	0.0148804			20.9	0.001781	0.0026099	-0.00012085			20.9	0.00584	0.0046631			20.9	0.00014038	0.00016846	0.00016968			20.9	6.3477e-05	9.3994e-05				20.9	0.00704346	0.00544434	0.00637207
		21	0.0147095	0.0164673	0.0149536			21	0.0018127	0.0026074	-0.00012085			21	0.00584	0.0046606			21	0.00014038	0.00016846	0.00016846			21	6.7139e-05	9.6436e-05				21	0.00705566	0.00546875	0.00638428
		21.1	0.0147583	0.0164795	0.0150635			21.1	0.0017566	0.0026123	-0.00012085			21.1	0.00582	0.0046594			21.1	0.00014038	0.00016724	0.00016846			21.1	6.8359e-05	9.5215e-05				21.1	0.00708008	0.00545654	0.00635986
		21.2	0.0147705	0.0165039	0.0150635			21.2	0.0017896	0.0026086	-0.00012085			21.2	0.00583	0.0046631			21.2	0.00014038	0.00016846	0.00016846			21.2	6.5918e-05	9.5215e-05				21.2	0.00706787	0.00544434	0.00635986
		21.3	0.0147705	0.0165894	0.0149902			21.3	0.001792	0.0025916	-0.00011963			21.3	0.00583	0.0046729			21.3	0.00014038	0.00016846	0.00016846			21.3	6.8359e-05	9.6436e-05				21.3	0.00710449	0.00543213	0.00637207
		21.4	0.0147461	0.0165771	0.0149414			21.4	0.0017749	0.0026208	-0.00011963			21.4	0.00585	0.0046814			21.4	0.00014038	0.00016846	0.00016846			21.4	6.958e-05	9.6436e-05				21.4	0.00709229	0.00541992	0.00634766
		21.5	0.0147461	0.0165894	0.0148804			21.5	0.0018201	0.0026233	-0.00011963			21.5	0.00586	0.0046814			21.5	0.00014038	0.00016724	0.00016846			21.5	6.8359e-05	9.6436e-05				21.5	0.00706787	0.00545654	0.00634766
		21.6	0.0146973	0.0165527	0.0149902			21.6	0.0017871	0.0026196	-0.00011963			21.6	0.00585	0.0046899			21.6	0.00013916	0.00016724	0.00016846			21.6	7.0801e-05	9.6436e-05				21.6	0.00706787	0.00545654	0.00634766
		21.7	0.0147461	0.0165161	0.0150269			21.7	0.001792	0.0026172	-0.00011963			21.7	0.00584	0.0046655			21.7	0.00013916	0.00016724	0.00016846			21.7	7.0801e-05	9.8877e-05				21.7	0.00709229	0.00545654	0.00637207
		21.8	0.0147705	0.0165161	0.0150269			21.8	0.0017896	0.0026086	-0.00012085			21.8	0.00585	0.0046863			21.8	0.00014038	0.00016846	0.00016846			21.8	7.3242e-05	9.7656e-05				21.8	0.00710449	0.00543213	0.00638428
		21.9	0.0147583	0.0164551	0.0149658			21.9	0.0017737	0.0026062	-0.00012085			21.9	0.00585	0.0046753			21.9	0.0001416	0.00016846	0.00016846			21.9	7.4463e-05	9.7656e-05				21.9	0.0071167	0.00544434	0.00638428
		22	0.0146851	0.0165283	0.0150146			22	0.0017969	0.002616	-0.00012085			22	0.00585	0.0046704			22	0.00014038	0.00016724	0.00016846			22	7.3242e-05	0.0001001				22	0.00714111	0.00543213	0.00635986
		22.1	0.0147583	0.0164917	0.0149902			22.1	0.0017908	0.0026135	-0.00012207			22.1	0.00585	0.0046619			22.1	0.00014038	0.00016846	0.00016846			22.1	7.4463e-05	9.7656e-05				22.1	0.00712891	0.00543213	0.00635986
		22.2	0.0147705	0.0164673	0.0150024			22.2	0.0017798	0.0026123	-0.00012085			22.2	0.00585	0.0046655			22.2	0.0001416	0.00016846	0.00016968			22.2	7.3242e-05	9.7656e-05				22.2	0.00708008	0.00541992	0.00639648
		22.3	0.0147705	0.0164795	0.0151001			22.3	0.0017896	0.002605	-0.00012085			22.3	0.00584	0.0046448			22.3	0.00014038	0.00016846	0.00016968			22.3	7.4463e-05	9.7656e-05				22.3	0.0071167	0.00541992	0.00637207
		22.4	0.0147217	0.0164429	0.0150391			22.4	0.0017456	0.0026135	-0.00011963			22.4	0.00585	0.0046741			22.4	0.00014038	0.00016846	0.00016846			22.4	7.3242e-05	9.8877e-05				22.4	0.00712891	0.00539551	0.00639648
		22.5	0.0148315	0.0163818	0.0150757			22.5	0.0018164	0.0025977	-0.00012085			22.5	0.00586	0.0046826			22.5	0.00014038	0.00016846	0.00016968			22.5	7.4463e-05	9.8877e-05				22.5	0.00715332	0.00541992	0.0064209
		22.6	0.0148682	0.0164795	0.0150146			22.6	0.0017834	0.0025891	-0.00012207			22.6	0.00585	0.0046936			22.6	0.0001416	0.00016968	0.00016968			22.6	7.5684e-05	0.00010132				22.6	0.00712891	0.00541992	0.00643311
		22.7	0.014856	0.0165039	0.0149658			22.7	0.0018201	0.0026111	-0.00012207			22.7	0.00586	0.0046704			22.7	0.00014038	0.00016846	0.00016968			22.7	7.6904e-05	0.0001001				22.7	0.00712891	0.00543213	0.00640869
		22.8	0.0147949	0.016394	0.0149048			22.8	0.0017883	0.0026062	-0.00012207			22.8	0.00586	0.004668			22.8	0.0001416	0.00016846	0.00016846			22.8	7.8125e-05	9.7656e-05				22.8	0.0071167	0.00541992	0.0064209
		22.9	0.0147461	0.0165039	0.0150269			22.9	0.001781	0.0026221	-0.00012085			22.9	0.00585	0.0046545			22.9	0.00014038	0.00016846	0.00016846			22.9	8.0566e-05	9.8877e-05				22.9	0.00716553	0.00541992	0.00643311
		23	0.0148438	0.0166626	0.0150024			23	0.0017883	0.0026184	-0.00012207			23	0.00585	0.0046521			23	0.00013916	0.00016846	0.00016846			23	7.8125e-05	0.0001001				23	0.00717773	0.00543213	0.00643311
		23.1	0.0148438	0.0166382	0.0149658			23.1	0.001759	0.0026123	-0.00012085			23.1	0.00586	0.0046667			23.1	0.00014038	0.00016846	0.00016846			23.1	7.9346e-05	0.0001001				23.1	0.00716553	0.00543213	0.00644531
		23.2	0.0148193	0.0166626	0.0149658			23.2	0.0018005	0.0025928	-0.00012085			23.2	0.00587	0.0046643			23.2	0.00014038	0.00016724	0.00016846			23.2	7.9346e-05	0.0001001				23.2	0.00717773	0.00544434	0.00643311
		23.3	0.0148438	0.0166992	0.0149902			23.3	0.0017798	0.0026123	-0.00012085			23.3	0.00586	0.0046606			23.3	0.00013916	0.00016846	0.00016724			23.3	8.0566e-05	0.00010254				23.3	0.00715332	0.00544434	0.00643311
		23.4	0.014856	0.0167236	0.0150024			23.4	0.0017688	0.002605	-0.00012207			23.4	0.00587	0.0046558			23.4	0.0001416	0.00016968	0.00016724			23.4	7.9346e-05	0.00010254				23.4	0.00715332	0.00544434	0.00644531
		23.5	0.0148071	0.0167603	0.0151489			23.5	0.001792	0.0026135	-0.00012085			23.5	0.00587	0.0046545			23.5	0.0001416	0.0001709	0.00016846			23.5	8.3008e-05	0.00010254				23.5	0.00716553	0.00544434	0.00644531
		23.6	0.0148193	0.016687	0.0150146			23.6	0.0017822	0.002616	-0.00012085			23.6	0.00585	0.0046509			23.6	0.00014038	0.00016968	0.00016846			23.6	8.3008e-05	0.00010254				23.6	0.00716553	0.00544434	0.00644531
		23.7	0.0148071	0.0166992	0.0151123			23.7	0.0017627	0.0026001	-0.00012085			23.7	0.00587	0.0046655			23.7	0.00013916	0.00016846	0.00016724			23.7	8.1787e-05	0.00010254				23.7	0.00716553	0.00544434	0.00644531
		23.8	0.0148315	0.0166138	0.0151611			23.8	0.0017859	0.0025842	-0.00011963			23.8	0.00588	0.0046716			23.8	0.0001416	0.00016846	0.00016724			23.8	8.4229e-05	0.00010254				23.8	0.00717773	0.00545654	0.00644531
		23.9	0.0147583	0.016748	0.0151489			23.9	0.0017725	0.0025842	-0.00012085			23.9	0.00588	0.0046631			23.9	0.0001416	0.00016846	0.00016846			23.9	8.4229e-05	0.00010376				23.9	0.00717773	0.00545654	0.0064209
		24	0.0147705	0.016748	0.0150757			24	0.0017981	0.0025867	-0.00012085			24	0.00588	0.0046814			24	0.0001416	0.00016724	0.00016846			24	8.4229e-05	0.00010254				24	0.00720215	0.00544434	0.00643311
		24.1	0.0147583	0.0167603	0.0149048			24.1	0.0017847	0.002594	-0.00012085			24.1	0.00587	0.0046765			24.1	0.0001416	0.00016846	0.00016968			24.1	8.5449e-05	0.00010498				24.1	0.00721436	0.00544434	0.00646973
		24.2	0.0148926	0.0168335	0.0148804			24.2	0.001803	0.0025928	-0.00012085			24.2	0.00586	0.0046558			24.2	0.00014038	0.00016968	0.00016846			24.2	8.3008e-05	0.00010376				24.2	0.00723877	0.00543213	0.00646973
		24.3	0.0148193	0.0169312	0.0149536			24.3	0.0017676	0.0026074	-0.00012085			24.3	0.00586	0.0046741			24.3	0.00014038	0.00016846	0.00016968			24.3	8.5449e-05	0.00010254				24.3	0.00722656	0.00541992	0.00645752
		24.4	0.0148682	0.0170044	0.0149048			24.4	0.0017468	0.0025977	-0.00012085			24.4	0.00586	0.0046851			24.4	0.0001416	0.00016846	0.00016968			24.4	8.5449e-05	0.00010498				24.4	0.00721436	0.00544434	0.00645752
		24.5	0.014856	0.0171631	0.0148438			24.5	0.0017383	0.0026282	-0.00012085			24.5	0.00588	0.0046716			24.5	0.00014038	0.00016846	0.00016846			24.5	8.9111e-05	0.00010254				24.5	0.00723877	0.00545654	0.00644531
		24.6	0.014856	0.0171631	0.0149658			24.6	0.0017456	0.0028186	-0.00012085			24.6	0.00587	0.0046741			24.6	0.00014038	0.00016846	0.00016846			24.6	8.7891e-05	0.00010498				24.6	0.00723877	0.00546875	0.00643311
		24.7	0.014856	0.0172485	0.014917			24.7	0.0017737	0.0030359	-0.00012085			24.7	0.00586	0.0046777			24.7	0.0001416	0.00016846	0.00016846			24.7	8.7891e-05	0.00010376				24.7	0.00723877	0.00546875	0.00645752
		24.8	0.014856	0.0173218	0.0150635			24.8	0.0017371	0.0031934	-0.00012085			24.8	0.00585	0.0046667			24.8	0.0001416	0.00016968	0.00016968			24.8	8.9111e-05	0.0001062				24.8	0.00725098	0.00545654	0.00649414
		24.9	0.0148071	0.0173706	0.0150635			24.9	0.0017334	0.0032739	-0.00011963			24.9	0.00583	0.0046777			24.9	0.00013916	0.00016846	0.00016968			24.9	9.0332e-05	0.00010376				24.9	0.00726318	0.00543213	0.00648193
		25	0.014856	0.0174194	0.0151001			25	0.0017407	0.0033411	-0.00012085			25	0.00584	0.0046716			25	0.00014038	0.00016846	0.00016968			25	9.0332e-05	0.00010742				25	0.00725098	0.00543213	0.00649414
		25.1	0.0148804	0.0175171	0.0150635			25.1	0.0017444	0.0035669	-0.00011963			25.1	0.00584	0.0046643			25.1	0.00014038	0.00016846	0.00016724			25.1	8.9111e-05	0.00010498				25.1	0.00727539	0.00544434	0.00650635
		25.2	0.0148804	0.0175415	0.0150879			25.2	0.0017493	0.0038782	-0.00011841			25.2	0.00585	0.0046753			25.2	0.00014038	0.00016968	0.00016846			25.2	9.1553e-05	0.00010742				25.2	0.00725098	0.00541992	0.00648193
		25.3	0.0148315	0.0175537	0.014978			25.3	0.0017358	0.0041345	-0.00012085			25.3	0.00585	0.004668			25.3	0.00014038	0.00016846	0.00016968			25.3	9.2773e-05	0.00010986				25.3	0.00725098	0.00540771	0.00648193
		25.4	0.0147705	0.0175659	0.0150024			25.4	0.0017297	0.0044128	-0.00012085			25.4	0.00584	0.0046643			25.4	0.00014038	0.00016846	0.00016846			25.4	9.3994e-05	0.0001062				25.4	0.0072876	0.00541992	0.00649414
		25.5	0.0148926	0.0176514	0.0149414			25.5	0.0017395	0.004679	-0.00012085			25.5	0.00583	0.0046631			25.5	0.00013916	0.00016846	0.00016724			25.5	9.0332e-05	0.00010864				25.5	0.00727539	0.00543213	0.00651855
		25.6	0.014856	0.0176758	0.0149536			25.6	0.0017236	0.0048596	-0.00011963			25.6	0.00584	0.0046765			25.6	0.00013916	0.00016846	0.00016846			25.6	9.3994e-05	0.00010742				25.6	0.0072876	0.00541992	0.00649414
		25.7	0.0148926	0.0177246	0.014978			25.7	0.0017578	0.0049231	-0.00012085			25.7	0.00585	0.0046704			25.7	0.0001416	0.00016968	0.00016724			25.7	9.2773e-05	0.00010742				25.7	0.00727539	0.00544434	0.00645752
		25.8	0.0148682	0.0177856	0.0149902			25.8	0.0017395	0.0050439	-0.00012085			25.8	0.00585	0.0046631			25.8	0.0001416	0.00016846	0.00016724			25.8	9.6436e-05	0.00010864				25.8	0.0072998	0.00545654	0.00645752
		25.9	0.0148926	0.0178101	0.0150146			25.9	0.001759	0.0052795	-0.00012085			25.9	0.00583	0.0046667			25.9	0.0001416	0.00016846	0.00016846			25.9	9.2773e-05	0.0001062				25.9	0.00725098	0.00543213	0.00648193
		26	0.0148682	0.0178467	0.0149658			26	0.001748	0.0056152	-0.00012085			26	0.00584	0.0046631			26	0.0001416	0.00016724	0.00016846			26	9.3994e-05	0.00010742				26	0.00726318	0.00543213	0.00650635
		26.1	0.014917	0.0178833	0.0150024			26.1	0.0017261	0.0059338	-0.00012085			26.1	0.00583	0.0046326			26.1	0.00014038	0.00016846	0.00016968			26.1	9.5215e-05	0.00010986				26.1	0.00726318	0.00543213	0.00650635
		26.2	0.0149292	0.0179077	0.0150269			26.2	0.0017371	0.0062256	-0.00012085			26.2	0.00584	0.0046631			26.2	0.0001416	0.00016724	0.00016968			26.2	9.5215e-05	0.00010864				26.2	0.00727539	0.00543213	0.00649414
		26.3	0.0149292	0.0178955	0.0149902			26.3	0.0017053	0.0064038	-0.00012085			26.3	0.00585	0.0046716			26.3	0.00014038	0.00016846	0.00016846			26.3	9.6436e-05	0.00010986				26.3	0.0072876	0.00543213	0.00650635
		26.4	0.0149414	0.0179932	0.0149902			26.4	0.001759	0.0065405	-0.00012207			26.4	0.00584	0.0046704			26.4	0.0001416	0.00016846	0.00016968			26.4	9.7656e-05	0.00011108				26.4	0.00727539	0.00545654	0.00651855
		26.5	0.0149536	0.0180054	0.0149902			26.5	0.001748	0.0066028	-0.00012085			26.5	0.00586	0.0046643			26.5	0.0001416	0.00016846	0.00016846			26.5	9.6436e-05	0.0001123				26.5	0.00726318	0.00546875	0.00646973
		26.6	0.0148682	0.0179443	0.0149658			26.6	0.00172	0.0065552	-0.00012085			26.6	0.00587	0.0046692			26.6	0.00014038	0.00016968	0.00016968			26.6	9.8877e-05	0.00010986				26.6	0.00727539	0.00545654	0.00649414
		26.7	0.0149292	0.0178833	0.0149536			26.7	0.0016797	0.0065173	-0.00011963			26.7	0.00586	0.0046631			26.7	0.0001416	0.00016846	0.00016968			26.7	9.7656e-05	0.0001123				26.7	0.00732422	0.00545654	0.00651855
		26.8	0.0149414	0.0178589	0.0148804			26.8	0.0017102	0.0065051	-0.00012085			26.8	0.00586	0.0046716			26.8	0.00014038	0.00016846	0.00016968			26.8	0.0001001	0.0001123				26.8	0.0072998	0.00545654	0.00651855
		26.9	0.0149536	0.0178223	0.0148315			26.9	0.0017004	0.0064685	-0.00012085			26.9	0.00596	0.0046741			26.9	0.0001416	0.00016968	0.00016724			26.9	9.7656e-05	0.00011108				26.9	0.00733643	0.00541992	0.00651855
		27	0.0149414	0.0178467	0.0149414			27	0.0017151	0.0063965	-0.00012085			27	0.00606	0.0046753			27	0.00014038	0.00017212	0.00016846			27	9.8877e-05	0.00010986				27	0.00732422	0.00545654	0.00651855
		27.1	0.0149048	0.0178223	0.0150024			27.1	0.0017151	0.0063806	-0.00011963			27.1	0.00614	0.0046826			27.1	0.00014038	0.0001709	0.00016846			27.1	0.0001001	0.00011108				27.1	0.00731201	0.00541992	0.00650635
		27.2	0.014917	0.0178101	0.0148804			27.2	0.0017114	0.0063708	-0.00012085			27.2	0.0062	0.0046753			27.2	0.00014038	0.00016968	0.00016846			27.2	0.0001001	0.00010986				27.2	0.00732422	0.00543213	0.00651855
		27.3	0.0149658	0.0177856	0.0150391			27.3	0.0017175	0.0063696	-0.00012085			27.3	0.00626	0.0046643			27.3	0.00014038	0.00017212	0.00016724			27.3	0.00010132	0.00011353				27.3	0.00732422	0.00544434	0.00653076
		27.4	0.0149536	0.0178955	0.0150391			27.4	0.0017249	0.0063745	-0.00012085			27.4	0.00633	0.0046533			27.4	0.0001416	0.0001709	0.00016846			27.4	0.0001001	0.00010986				27.4	0.00731201	0.00543213	0.00651855
		27.5	0.0148926	0.0179199	0.0150757			27.5	0.001698	0.0063794	-0.00011963			27.5	0.00643	0.0046655			27.5	0.00014404	0.00017212	0.00016968			27.5	0.0001001	0.0001123				27.5	0.00731201	0.00540771	0.00651855
		27.6	0.014856	0.017981	0.0149902			27.6	0.0017273	0.006366	-0.00011963			27.6	0.00646	0.0046643			27.6	0.00014648	0.00017334	0.00016846			27.6	0.00010132	0.00010986				27.6	0.00732422	0.00544434	0.00650635
		27.7	0.0147827	0.0179688	0.014978			27.7	0.0017188	0.0063928	-0.00012085			27.7	0.00657	0.0046692			27.7	0.00014648	0.00017334	0.00016846			27.7	0.0001001	0.00011353				27.7	0.00733643	0.00543213	0.00650635
		27.8	0.0148804	0.017981	0.0149414			27.8	0.0017188	0.0064075	-0.00012085			27.8	0.00671	0.0046716			27.8	0.00014526	0.00017212	0.00016724			27.8	0.00010132	0.0001123				27.8	0.00731201	0.00541992	0.00651855
		27.9	0.0148926	0.0179443	0.0148804			27.9	0.0017285	0.0063794	-0.00011841			27.9	0.00682	0.0046729			27.9	0.00013794	0.00017212	0.00016968			27.9	0.00010498	0.00011353				27.9	0.00732422	0.00541992	0.00650635
		28	0.0149292	0.0179443	0.0147827			28	0.0017224	0.0062842	-0.00012085			28	0.00687	0.004646			28	0.00013916	0.00017212	0.00016968			28	0.00010254	0.0001123				28	0.00733643	0.00543213	0.00653076
		28.1	0.0148804	0.0179077	0.0148804			28.1	0.001709	0.0062317	-0.00012085			28.1	0.00692	0.004668			28.1	0.00014648	0.0001709	0.00016846			28.1	0.00010376	0.00011475				28.1	0.00733643	0.00544434	0.00653076
		28.2	0.0148926	0.0178345	0.0148315			28.2	0.0017249	0.006228	-0.00012085			28.2	0.00696	0.0046838			28.2	0.00014404	0.00017212	0.00016846			28.2	0.00010254	0.00011475				28.2	0.00734863	0.00540771	0.00655518
		28.3	0.0149048	0.0179077	0.0148071			28.3	0.001731	0.0062512	-0.00012085			28.3	0.00697	0.0046924			28.3	0.0001355	0.00017334	0.00016968			28.3	0.00010254	0.00011353				28.3	0.00734863	0.00544434	0.00653076
		28.4	0.0149048	0.0179199	0.0147583			28.4	0.0017273	0.0062683	-0.00011963			28.4	0.007	0.0046875			28.4	0.00013672	0.00017212	0.00016968			28.4	0.00010498	0.0001123				28.4	0.00733643	0.00543213	0.00655518
		28.5	0.0148315	0.0179199	0.0147949			28.5	0.0017297	0.0062781	-0.00011841			28.5	0.00702	0.0046838			28.5	0.00013916	0.00017212	0.00016968			28.5	0.00010376	0.00011597				28.5	0.00733643	0.00545654	0.00657959
		28.6	0.014917	0.0179321	0.0148804			28.6	0.0017358	0.0062866	-0.00012085			28.6	0.00704	0.0046631			28.6	0.0001416	0.00017212	0.00016968			28.6	0.00010498	0.00011353				28.6	0.00734863	0.00546875	0.00657959
		28.7	0.0148804	0.0178955	0.0148926			28.7	0.0017212	0.0063049	-0.00011963			28.7	0.00703	0.0046729			28.7	0.00014282	0.00017334	0.00016968			28.7	0.00010864	0.00011719				28.7	0.00736084	0.00546875	0.00656738
		28.8	0.0149048	0.0178833	0.014917			28.8	0.0017224	0.0063062	-0.00011963			28.8	0.00702	0.0046692			28.8	0.0001416	0.00017334	0.00016846			28.8	0.00010864	0.00011719				28.8	0.00734863	0.00541992	0.00657959
		28.9	0.0148926	0.017981	0.0148926			28.9	0.0017419	0.0062915	-0.00012085			28.9	0.00701	0.0046582			28.9	0.00014038	0.00017212	0.00016968			28.9	0.00010742	0.00011475				28.9	0.00734863	0.00544434	0.00656738
		29	0.0148804	0.0179199	0.0148193			29	0.0017419	0.0063135	-0.00011963			29	0.00699	0.0046606			29	0.00014038	0.00017212	0.00016846			29	0.0001062	0.00011719				29	0.00732422	0.00544434	0.00654297
		29.1	0.0148438	0.0179321	0.0147705			29.1	0.0017358	0.0062976	-0.00011963			29.1	0.00699	0.0046521			29.1	0.00014038	0.00017212	0.00016968			29.1	0.00010742	0.00011597				29.1	0.00738525	0.00543213	0.00657959
		29.2	0.0148682	0.0179321	0.0149536			29.2	0.0017468	0.006283	-0.00012085			29.2	0.00699	0.0046509			29.2	0.00014038	0.00017212	0.00016846			29.2	0.00011108	0.00011719				29.2	0.00739746	0.00548096	0.00655518
		29.3	0.0148071	0.0179077	0.0149536			29.3	0.0017407	0.0062634	-0.00012085			29.3	0.00698	0.0046497			29.3	0.00014038	0.00017212	0.00016846			29.3	0.00010986	0.00011963				29.3	0.00737305	0.00544434	0.00655518
		29.4	0.0148193	0.0178467	0.014917			29.4	0.0017285	0.0062427	-0.00011963			29.4	0.007	0.0046826			29.4	0.00014038	0.00017212	0.00016846			29.4	0.00010986	0.00011719				29.4	0.00739746	0.00544434	0.00655518
		29.5	0.0148315	0.0179077	0.0148315			29.5	0.0017493	0.0062231	-0.00011963			29.5	0.00699	0.0046802			29.5	0.0001416	0.00017212	0.00016846			29.5	0.00010864	0.00011719				29.5	0.00739746	0.00543213	0.00657959
		29.6	0.0148315	0.0179199	0.0147827			29.6	0.0017505	0.0062268	-0.00012085			29.6	0.00698	0.0046851			29.6	0.00014282	0.00017212	0.00016968			29.6	0.00011108	0.00011719				29.6	0.00737305	0.00543213	0.00655518
		29.7	0.0148315	0.0179321	0.0147705			29.7	0.0017529	0.0062097	-0.00012085			29.7	0.00698	0.0046912			29.7	0.00014038	0.00017334	0.00016968			29.7	0.00010986	0.00011719				29.7	0.00739746	0.00546875	0.00655518
		29.8	0.0148682	0.0179199	0.0149048			29.8	0.0017664	0.0061462	-0.00011963			29.8	0.00697	0.0046851			29.8	0.0001416	0.00017212	0.00016846			29.8	0.00010864	0.00011719				29.8	0.00740967	0.00546875	0.00653076
		29.9	0.0148682	0.0179077	0.0149414			29.9	0.0017676	0.0060767	-0.00011963			29.9	0.00696	0.0046851			29.9	0.0001416	0.00017212	0.00016846			29.9	0.00010986	0.00011719				29.9	0.00740967	0.00545654	0.00656738
		30	0.0148315	0.0179077	0.014917			30	0.001748	0.0060583	-0.00011963			30	0.00696	0.0047107			30	0.00014038	0.00017212	0.00016846			30	0.00010986	0.00011597				30	0.00740967	0.00543213	0.00655518
		30.1	0.014856	0.0178955	0.0150269			30.1	0.0017456	0.0060498	-0.00011963			30.1	0.00696	0.0047034			30.1	0.0001416	0.00017212	0.00016724			30.1	0.0001123	0.00011841				30.1	0.00739746	0.00540771	0.00654297
		30.2	0.0148193	0.0179199	0.0149902			30.2	0.0017566	0.0060352	-0.00012085			30.2	0.00696	0.0047034			30.2	0.0001416	0.00017334	0.00016968			30.2	0.00011108	0.00011963				30.2	0.00738525	0.00543213	0.00656738
		30.3	0.0148193	0.0179077	0.0149414			30.3	0.0017419	0.0060193	-0.00011963			30.3	0.00697	0.0047144			30.3	0.00013916	0.00017334	0.00016846			30.3	0.00011108	0.00011719				30.3	0.00740967	0.00544434	0.00656738
		30.4	0.0148193	0.0178833	0.0149292			30.4	0.0017468	0.0060254	-0.00011963			30.4	0.00697	0.0047327			30.4	0.00014038	0.00017334	0.00016724			30.4	0.00011475	0.00011963				30.4	0.00742188	0.00544434	0.00655518
		30.5	0.0148682	0.0178833	0.014917			30.5	0.0017493	0.0060181	-0.00012085			30.5	0.00698	0.0047437			30.5	0.00014038	0.00017456	0.00016724			30.5	0.00011108	0.00011841				30.5	0.00743408	0.00544434	0.00656738
		30.6	0.0148682	0.0178955	0.0149658			30.6	0.0017468	0.0059998	-0.00012085			30.6	0.00696	0.0047607			30.6	0.00014038	0.00017456	0.00016846			30.6	0.0001123	0.00011963				30.6	0.00744629	0.00545654	0.0065918
		30.7	0.0148682	0.0178345	0.0149536			30.7	0.0017493	0.0059924	-0.00011963			30.7	0.00699	0.0047839			30.7	0.00014038	0.00017456	0.00016724			30.7	0.0001123	0.00011963				30.7	0.00743408	0.00541992	0.00657959
		30.8	0.0149048	0.0179443	0.0149414			30.8	0.0017505	0.0059717	-0.00011963			30.8	0.007	0.0047791			30.8	0.0001416	0.00017456	0.00016724			30.8	0.00011475	0.00011963				30.8	0.00742188	0.00544434	0.00656738
		30.9	0.0148804	0.0179077	0.014856			30.9	0.001759	0.0060693	-0.00011963			30.9	0.00699	0.0047583			30.9	0.00014038	0.00017456	0.00016846			30.9	0.0001123	0.00011963				30.9	0.00743408	0.00544434	0.00654297
		31	0.0148193	0.0178711	0.0148682			31	0.001748	0.0061572	-0.00011963			31	0.00698	0.0047522			31	0.0001416	0.00017456	0.00016846			31	0.00011475	0.00011963				31	0.00742188	0.00541992	0.00655518
		31.1	0.0149048	0.0178711	0.0148682			31.1	0.0017358	0.0062329	-0.00011963			31.1	0.00694	0.0046875			31.1	0.0001416	0.00017456	0.00016968			31.1	0.00011353	0.00011963				31.1	0.00743408	0.00541992	0.00656738
		31.2	0.0148804	0.0178467	0.0149048			31.2	0.0017273	0.0062878	-0.00011963			31.2	0.00693	0.0046375			31.2	0.00014038	0.00017456	0.00016846			31.2	0.00011353	0.00011841				31.2	0.00743408	0.00543213	0.00657959
		31.3	0.0148438	0.017749	0.0149658			31.3	0.0016992	0.0062891	-0.00011963			31.3	0.00696	0.0046545			31.3	0.0001416	0.00017334	0.00016724			31.3	0.00011597	0.00012085				31.3	0.00743408	0.00540771	0.006604
		31.4	0.0148438	0.0177979	0.0149658			31.4	0.0017236	0.006272	-0.00011963			31.4	0.00696	0.0046545			31.4	0.0001416	0.00017334	0.00016846			31.4	0.00011475	0.00012207				31.4	0.00742188	0.00543213	0.006604
		31.5	0.0148682	0.0178589	0.0148926			31.5	0.0017249	0.0062805	-0.00012085			31.5	0.00697	0.0046204			31.5	0.0001416	0.00017334	0.00016968			31.5	0.00011353	0.00012085				31.5	0.00744629	0.00543213	0.006604
		31.6	0.0148804	0.0178955	0.0148193			31.6	0.0017578	0.0062866	-0.00011963			31.6	0.00698	0.004696			31.6	0.00014038	0.00017212	0.00016846			31.6	0.00011597	0.00012085				31.6	0.00744629	0.00543213	0.00661621
		31.7	0.0149536	0.0178833	0.014856			31.7	0.0018506	0.0062854	-0.00012085			31.7	0.00698	0.0049512			31.7	0.0001416	0.00017212	0.00016846			31.7	0.00011597	0.00011963				31.7	0.0074585	0.00540771	0.006604
		31.8	0.0149902	0.0178833	0.0148071			31.8	0.0021082	0.0062878	-0.00011963			31.8	0.00697	0.005105			31.8	0.0001416	0.00017334	0.00016968			31.8	0.00011597	0.00011963				31.8	0.0074707	0.00540771	0.006604
		31.9	0.0149658	0.0178955	0.0148804			31.9	0.0025928	0.0062842	-0.00011963			31.9	0.00696	0.0052905			31.9	0.0001416	0.00017334	0.00016846			31.9	0.00011597	0.00012085				31.9	0.0074585	0.00540771	0.0065918
		32	0.0149536	0.0178467	0.0149292			32	0.0030957	0.006272	-0.00011963			32	0.00698	0.0054944			32	0.0001416	0.00017334	0.00016846			32	0.00011963	0.00012085				32	0.0074707	0.00541992	0.006604
		32.1	0.014978	0.0178223	0.0149048			32.1	0.0036169	0.0062659	-0.00012085			32.1	0.00697	0.0056885			32.1	0.00014038	0.00017334	0.00016846			32.1	0.00011597	0.00012085				32.1	0.0074585	0.00544434	0.00657959
		32.2	0.0149414	0.0178223	0.0148926			32.2	0.0039099	0.0062878	-0.00011963			32.2	0.00697	0.0058435			32.2	0.00014038	0.00017334	0.00016846			32.2	0.00011841	0.00012329				32.2	0.00748291	0.00543213	0.00657959
		32.3	0.0149658	0.0178711	0.0148926			32.3	0.00396	0.0063013	-0.00012085			32.3	0.00696	0.0059717			32.3	0.0001416	0.00017456	0.00016846			32.3	0.00011841	0.00012085				32.3	0.0074707	0.00543213	0.006604
		32.4	0.0149902	0.0179077	0.0148804			32.4	0.0039355	0.0063049	-0.00011963			32.4	0.00697	0.0059814			32.4	0.00014038	0.00017334	0.00016968			32.4	0.00011841	0.00011963				32.4	0.00748291	0.00543213	0.00662842
		32.5	0.0149536	0.0179077	0.014856			32.5	0.0038354	0.0063171	-0.00012085			32.5	0.00694	0.0059277			32.5	0.00014038	0.00017334	0.00016846			32.5	0.00011719	0.00012085				32.5	0.00748291	0.00544434	0.00661621
		32.6	0.0149414	0.0178345	0.0150024			32.6	0.0037061	0.0063147	-0.00012085			32.6	0.00696	0.0058667			32.6	0.00014038	0.00017456	0.00016846			32.6	0.00011719	0.00012207				32.6	0.0074707	0.00544434	0.00661621
		32.7	0.0149536	0.0178589	0.0150391			32.7	0.0037415	0.006261	-0.00012085			32.7	0.00696	0.0057935			32.7	0.0001416	0.00017456	0.00016846			32.7	0.00012085	0.00011963				32.7	0.00743408	0.00545654	0.00661621
		32.8	0.0149414	0.0178711	0.0150391			32.8	0.0039673	0.0062976	-0.00011963			32.8	0.00696	0.0057336			32.8	0.00014038	0.00017334	0.00016968			32.8	0.00011841	0.00012329				32.8	0.00748291	0.00545654	0.0065918
		32.9	0.0149414	0.0178955	0.01521			32.9	0.0041785	0.0063733	-0.00011963			32.9	0.00695	0.0057068			32.9	0.00014038	0.00017334	0.00016968			32.9	0.00011963	0.00012207				32.9	0.0074585	0.00544434	0.00662842
		33	0.0149536		0.015271			33	0.0042566	0.0064465	-0.00011963			33	0.00696	0.0056812			33	0.0001416	0.00017456	0.00016968			33	0.00011841	0.00012207				33	0.0074707	0.00545654	0.00664063
		33.1	0.0150024		0.0153442			33.1	0.004248	0.0064966	-0.00011963			33.1	0.00696	0.0056836			33.1	0.0001416	0.00017456	0.00016968			33.1	0.00012207	0.00012451				33.1	0.0074707	0.00545654	0.00664063
		33.2	0.0150146		0.015332			33.2	0.0041809	0.0065161	-0.00011963			33.2	0.00698	0.0057166			33.2	0.0001416	0.00017456	0.00016968			33.2	0.00011841	0.00012329				33.2	0.0074707	0.00543213	0.00666504
		33.3	0.0150146		0.0153076			33.3	0.0041541	0.0064758	-0.00011963			33.3	0.00693	0.0057178			33.3	0.00014038	0.00017334	0.00016968			33.3	0.00012207	0.00012329				33.3	0.0074585	0.00545654	0.00665283
		33.4	0.0150391		0.0152466			33.4	0.0041309	0.0064734	-0.00011963			33.4	0.00695	0.0057178			33.4	0.00014038	0.00017334	0.0001709			33.4	0.00011841	0.00012207				33.4	0.00748291	0.00544434	0.00664063
		33.5	0.0150024		0.015271			33.5	0.0040881	0.006488	-0.00011963			33.5	0.00696	0.0057227			33.5	0.00014282	0.00017334	0.0001709			33.5	0.00011963	0.00012085				33.5	0.00748291	0.00545654	0.00661621
		33.6	0.0150146		0.0154419			33.6	0.0040552	0.0064783	-0.00011963			33.6	0.00697	0.0057178			33.6	0.0001416	0.00017334	0.00016968			33.6	0.00012085	0.00012085				33.6	0.00750732	0.00546875	0.00662842
		33.7	0.0149902		0.0153931			33.7	0.0040515	0.0064954	-0.00011963			33.7	0.00698	0.00573			33.7	0.00014038	0.00017334	0.00016968			33.7	0.00012085	0.00012085				33.7	0.00751953	0.00546875	0.00664063
		33.8	0.0149536		0.0153931			33.8	0.0040588	0.0065027	-0.00011963			33.8	0.00698	0.0057397			33.8	0.0001416	0.00017212	0.00016846			33.8	0.00012085	0.00012207				33.8	0.00753174	0.00546875	0.00665283
		33.9	0.0149536		0.0154175			33.9	0.0040613	0.0064771	-0.00012085			33.9	0.00698	0.0057251			33.9	0.00014038	0.00017212	0.00016968			33.9	0.00012207	0.00012207				33.9	0.00748291	0.00546875	0.00667725
		34	0.0149658		0.0154785			34	0.0040454	0.0064417	-0.00011963			34	0.00697	0.0057568			34	0.00014038	0.00017456	0.00016846			34	0.00012207	0.00012329				34	0.00749512	0.00546875	0.00667725
		34.1	0.0149536		0.0154541			34.1	0.0040137	0.0064563	-0.00011963			34.1	0.00695	0.005741			34.1	0.00014038	0.00017334	0.00016968			34.1	0.00012085	0.00012207				34.1	0.00750732	0.00546875	0.00667725
		34.2	0.0150635		0.0156494			34.2	0.0039771	0.0064368	-0.00011963			34.2	0.00696	0.0057471			34.2	0.00014038	0.00017334	0.00016968			34.2	0.00012085	0.00012329				34.2	0.00751953	0.00546875	0.00666504
		34.3	0.0150391		0.015686			34.3	0.0039441	0.0064099	-0.00012085			34.3	0.00695	0.0057385			34.3	0.00014038	0.00017212	0.00016968			34.3	0.00012207	0.00012329				34.3	0.00750732	0.00545654	0.00666504
		34.4	0.0150269		0.0158569			34.4	0.003916	0.0064001	-0.00012085			34.4	0.00694	0.0057397			34.4	0.00014038	0.00017334	0.00016968			34.4	0.00012207	0.00012451				34.4	0.00753174	0.00545654	0.00667725
		34.5	0.0150269		0.0159668			34.5	0.0039307	0.0063965	-0.00011963			34.5	0.00697	0.0057446			34.5	0.00014282	0.00017334	0.00016968			34.5	0.00012329	0.00012207				34.5	0.00753174	0.00548096	0.00666504
		34.6	0.0150024		0.0159912			34.6	0.0039954	0.0063831	-0.00011963			34.6	0.00695	0.0057532			34.6	0.00014038	0.00017334	0.00016968			34.6	0.00012329	0.00012451				34.6	0.00751953	0.00548096	0.00667725
		34.7	0.0150146		0.0159668			34.7	0.0040149	0.0063635	-0.00011963			34.7	0.00696	0.0057544			34.7	0.00014038	0.00017334	0.00016846			34.7	0.00012573	0.00012329				34.7	0.00753174	0.00549316	0.00664063
		34.8	0.0150269		0.0161011			34.8	0.0040344	0.0063293	-0.00011963			34.8	0.00696	0.0057593			34.8	0.0001416	0.00017334	0.00016968			34.8	0.00012329	0.00012329				34.8	0.00753174	0.00550537	0.00667725
		34.9	0.0150513		0.01604			34.9	0.0040576	0.0063074	-0.00011841			34.9	0.00694	0.0057532			34.9	0.00014038	0.00017334	0.00016968			34.9	0.00012573	0.00012451				34.9	0.00754395	0.00551758	0.00667725
		35	0.0150513		0.0160645			35	0.0040649	0.0063074	-0.00011963			35	0.00693	0.0057556			35	0.00013916	0.00017334	0.00016968			35	0.00012451	0.00012329				35	0.00753174	0.00551758	0.00666504
		35.1	0.0150513		0.0160156			35.1	0.0040442	0.0063025	-0.00011841			35.1	0.00693	0.005769			35.1	0.00013916	0.00017334	0.00016846			35.1	0.00012451	0.00012329				35.1	0.00755615	0.00549316	0.00667725
		35.2	0.0151001		0.0161011			35.2	0.0040503	0.0062854	-0.00012085			35.2	0.00695	0.0057556			35.2	0.00013794	0.00017334	0.00016846			35.2	0.00012207	0.00012329				35.2	0.00749512	0.00554199	0.00668945
		35.3	0.0150635		0.0160767			35.3	0.004043	0.0062939	-0.00012085			35.3	0.00695	0.0057617			35.3	0.00013916	0.00017334	0.00016968			35.3	0.00012573	0.00012329				35.3	0.00751953	0.00552979	0.00667725
		35.4	0.0150391		0.0161621			35.4	0.0040271	0.0062976	-0.00011963			35.4	0.00697	0.0057593			35.4	0.00013916	0.00017334	0.00016968			35.4	0.00012451	0.00012329				35.4	0.00755615	0.0055542	0.00670166
		35.5	0.0150391		0.0161499			35.5	0.0040295	0.0062927	-0.00011963			35.5	0.00695	0.0057458			35.5	0.00014038	0.00017334	0.0001709			35.5	0.00012451	0.00012573				35.5	0.00751953	0.00554199	0.00667725
		35.6	0.0150024		0.0162354			35.6	0.0040344	0.0063074	-0.00012085			35.6	0.00695	0.0057275			35.6	0.00013916	0.00017334	0.0001709			35.6	0.00012573	0.00012451				35.6	0.00750732	0.00554199	0.00668945
		35.7	0.0150146		0.0162598			35.7	0.0040271	0.0063098	-0.00012085			35.7	0.00694	0.0057654			35.7	0.00014038	0.00017456	0.00016968			35.7	0.00012695	0.00012573				35.7	0.00749512	0.00551758	0.00672607
		35.8	0.0150757		0.016333			35.8	0.0040491	0.0062683	-0.00012085			35.8	0.00696	0.0057751			35.8	0.00013916	0.00017456	0.0001709			35.8	0.00012695	0.00012573				35.8	0.00750732	0.00551758	0.00672607
		35.9	0.0150635		0.0163086			35.9	0.0040686	0.0062524	-0.00011963			35.9	0.00698	0.0057849			35.9	0.00014038	0.00017334	0.00016968			35.9	0.00012573	0.00012329				35.9	0.00754395	0.00549316	0.00672607
		36	0.0150146		0.0162842			36	0.004082	0.0062695	-0.00011963			36	0.00697	0.0057886			36	0.0001416	0.00017334	0.00016968			36	0.00012451	0.00012451				36	0.00753174	0.00546875	0.00670166
		36.1	0.0150513		0.0164307			36.1	0.0040991	0.0062646	-0.00011963			36.1	0.00696	0.0057922			36.1	0.00014038	0.00017334	0.0001709			36.1	0.00012451	0.00012451				36.1	0.00753174	0.00548096	0.00670166
		36.2	0.0150146		0.016394			36.2	0.0041101	0.0062561	-0.00011963			36.2	0.00695	0.0057581			36.2	0.00014282	0.00017212	0.00016968			36.2	0.00012817	0.00012695				36.2	0.00753174	0.00548096	0.00672607
		36.3	0.0150391		0.0164185			36.3	0.0041138	0.0062537	-0.00011841			36.3	0.00691	0.0057861			36.3	0.0001416	0.00017456	0.0001709			36.3	0.00012695	0.00012695				36.3	0.00755615	0.00545654	0.00672607
		36.4	0.0150391		0.0163452			36.4	0.0040991	0.0062305	-0.00011963			36.4	0.00694	0.0057861			36.4	0.00013916	0.00017334	0.00016968			36.4	0.00012817	0.00012573				36.4	0.00753174	0.00544434	0.00673828
		36.5	0.0150513		0.0163208			36.5	0.0041113	0.0061987	-0.00011963			36.5	0.00694	0.0057837			36.5	0.0001416	0.00017212	0.00016968			36.5	0.00012695	0.00012573				36.5	0.00756836	0.00548096	0.00671387
		36.6	0.0150269		0.0162598			36.6	0.0041223	0.0062158	-0.00011963			36.6	0.00696	0.005791			36.6	0.00014038	0.00017334	0.0001709			36.6	0.00012695	0.00012939				36.6	0.00756836	0.00550537	0.00670166
		36.7	0.0150879		0.0162964			36.7	0.0041101	0.0062134	-0.00011963			36.7	0.00699	0.0057788			36.7	0.0001416	0.00017456	0.00016968			36.7	0.00012695	0.00012939				36.7	0.00753174	0.00548096	0.00668945
		36.8	0.0150757		0.0162964			36.8	0.0041187	0.0062122	-0.00012085			36.8	0.00699	0.0057751			36.8	0.00014038	0.00017334	0.00016968			36.8	0.00012817	0.00012573				36.8	0.00754395	0.00545654	0.00667725
		36.9	0.0150391		0.0162842			36.9	0.0040979	0.0062146	-0.00012085			36.9	0.00697	0.00578			36.9	0.00014038	0.00017456	0.00016968			36.9	0.00012817	0.00012817				36.9	0.00755615	0.00544434	0.00668945
		37	0.0150391		0.0162598			37	0.004071	0.0062195	-0.00011963			37	0.00697	0.0057874			37	0.00013916	0.00017334	0.00016846			37	0.00012817	0.00012573				37	0.00751953	0.00539551	0.00670166
		37.1	0.0150391		0.0162964			37.1	0.0040857	0.0062097	-0.00011963			37.1	0.00698	0.0057861			37.1	0.00014038	0.00017334	0.00016968			37.1	0.00012817	0.00012695				37.1	0.00755615	0.00546875	0.00671387
		37.2	0.014978		0.0162842			37.2	0.004082	0.0062146	-0.00012085			37.2	0.00698	0.0057874			37.2	0.00014038	0.00017334	0.00016968			37.2	0.00012939	0.00012695				37.2	0.00755615	0.00552979	0.00668945
		37.3	0.0150513		0.0163208			37.3	0.0040784	0.0062219	-0.00011963			37.3	0.00695	0.0057922			37.3	0.00014038	0.00017334	0.00016968			37.3	0.00012817	0.00012695				37.3	0.00755615	0.0055542	0.00670166
		37.4	0.0150024		0.0162354			37.4	0.0040759	0.0062195	-0.00012085			37.4	0.00694	0.0057751			37.4	0.00014038	0.00017456	0.00016846			37.4	0.00012939	0.00012939				37.4	0.00756836	0.00560303	0.00671387
		37.5	0.0150024		0.0162231			37.5	0.0040698	0.0062158	-0.00011963			37.5	0.00694	0.0057837			37.5	0.0001416	0.00017578	0.00016846			37.5	0.00012817	0.00012817				37.5	0.00756836	0.00562744	0.00672607
		37.6	0.0150146		0.0163086			37.6	0.0040417	0.0062219	-0.00011963			37.6	0.00692	0.0057837			37.6	0.00014038	0.00017456	0.00016968			37.6	0.00013062	0.00012817				37.6	0.00754395	0.00563965	0.00670166
		37.7	0.0150146		0.0163208			37.7	0.0040393	0.0062158	-0.00011963			37.7	0.00692	0.0057813			37.7	0.0001416	0.00017334	0.00016968			37.7	0.00013184	0.00012695				37.7	0.00758057	0.0057251	0.00672607
		37.8	0.0150269		0.0161621			37.8	0.004043	0.0061951	-0.00011963			37.8	0.00695	0.0057825			37.8	0.00014038	0.00017334	0.00016968			37.8	0.00013062	0.00012939				37.8	0.00756836	0.00576172	0.00671387
		37.9	0.0150146		0.0162476			37.9	0.004054	0.0062158	-0.00011841			37.9	0.00695	0.00578			37.9	0.0001416	0.00017456	0.00016846			37.9	0.00013062	0.00012695				37.9	0.00756836	0.00578613	0.00672607
		38	0.0151001		0.0163452			38	0.0040588	0.0062183	-0.00011963			38	0.00695	0.00578			38	0.0001416	0.00017578	0.0001709			38	0.00012939	0.00012695				38	0.00756836	0.00579834	0.00675049
		38.1	0.0150391		0.0163086			38.1	0.0040564	0.0062231	-0.00011963			38.1	0.00696	0.0057593			38.1	0.00014038	0.00017334	0.0001709			38.1	0.00012939	0.00012695				38.1	0.00755615	0.00583496	0.00673828
		38.2	0.0150024		0.0162598			38.2	0.0040527	0.0062122	-0.00012085			38.2	0.00698	0.0057886			38.2	0.0001416	0.00017334	0.0001709			38.2	0.00013184	0.00012817				38.2	0.00756836	0.00584717	0.00673828
		38.3	0.0150269		0.0162231			38.3	0.004054	0.0062073	-0.00011963			38.3	0.00696	0.0057959			38.3	0.0001416	0.00017456	0.00016968			38.3	0.00013062	0.00012939				38.3	0.00755615	0.00584717	0.00675049
		38.4	0.0150757		0.0161499			38.4	0.0040759	0.006189	-0.00011963			38.4	0.00691	0.0058057			38.4	0.00014282	0.00017334	0.0001709			38.4	0.00013062	0.00012939				38.4	0.00756836	0.00583496	0.00673828
		38.5	0.0150024		0.0162231			38.5	0.0040649	0.0062	-0.00011963			38.5	0.00695	0.0058118			38.5	0.00014282	0.00017334	0.00016968			38.5	0.00013062	0.00012695				38.5	0.00758057	0.00582275	0.00672607
		38.6	0.0151001		0.016272			38.6	0.0040515	0.0062073	-0.00012085			38.6	0.00695	0.0057983			38.6	0.00014771	0.00017334	0.00016968			38.6	0.00013062	0.00012695				38.6	0.00758057	0.00582275	0.00675049
		38.7	0.0150513		0.016394			38.7	0.0040576	0.0062109	-0.00011963			38.7	0.00693	0.0057898			38.7	0.00015625	0.00017334	0.00016968			38.7	0.00013184	0.00012817				38.7	0.00756836	0.00585938	0.0067627
		38.8	0.0150146		0.016394			38.8	0.0040491	0.0062109	-0.00011963			38.8	0.00694	0.0057996			38.8	0.00016357	0.00017334	0.00016968			38.8	0.00013184	0.00012695				38.8	0.00755615	0.00587158	0.0067627
		38.9	0.0150146		0.0164185			38.9	0.004032	0.0062109	-0.00011963			38.9	0.00695	0.0057983			38.9	0.00017578	0.00017334	0.00016968			38.9	0.00013062	0.00012817				38.9	0.00758057	0.00584717	0.00673828
		39	0.0150146		0.016394			39	0.0040479	0.0062036	-0.00011841			39	0.00695	0.0057739			39	0.00018188	0.00017456	0.0001709			39	0.00013184	0.00012817				39	0.00758057	0.00588379	0.00673828
		39.1	0.0150024		0.016333			39.1	0.0040454	0.0061963	-0.00012085			39.1	0.00696	0.0058044			39.1	0.00018311	0.00017456	0.00016968			39.1	0.00013184	0.00012695				39.1	0.00758057	0.005896	0.00668945
		39.2	0.0150513		0.0164063			39.2	0.0040381	0.0061963	-0.00012085			39.2	0.00698	0.0057983			39.2	0.00019043	0.00017456	0.0001709			39.2	0.00013306	0.00012939				39.2	0.00756836	0.005896	0.00670166
		39.3	0.0150391		0.0164795			39.3	0.0040393	0.0062	-0.00011963			39.3	0.00694	0.0058032			39.3	0.00020264	0.000177	0.0001709			39.3	0.00013306	0.00013062				39.3	0.00756836	0.005896	0.00672607
		39.4	0.0150757		0.0165283			39.4	0.0040454	0.0062	-0.00011963			39.4	0.00693	0.0057764			39.4	0.0002063	0.00017334	0.0001709			39.4	0.00013184	0.00012817				39.4	0.00758057	0.0059082	0.00673828
		39.5	0.0150635		0.0165039			39.5	0.0040283	0.0062012	-0.00011963			39.5	0.00695	0.005769			39.5	0.00020996	0.00017212	0.00016968			39.5	0.00013428	0.00012817				39.5	0.00758057	0.00588379	0.00673828
		39.6	0.0150513		0.0165527			39.6	0.0040381	0.0062097	-0.00011841			39.6	0.00696	0.0057813			39.6	0.00021484	0.00017456	0.00016846			39.6	0.00013306	0.00012939				39.6	0.00760498	0.0059082	0.00673828
		39.7	0.0150146		0.0165161			39.7	0.0040332	0.0061804	-0.00011841			39.7	0.00693	0.0057751			39.7	0.00021729	0.00017334	0.00016846			39.7	0.00013428	0.00012939				39.7	0.00760498	0.0059082	0.00671387
		39.8	0.014978		0.0165894			39.8	0.0040295	0.0062024	-0.00011963			39.8	0.00695	0.0057715			39.8	0.00021973	0.00017334	0.00016968			39.8	0.00013306	0.00012817				39.8	0.00759277	0.005896	0.00672607
		39.9	0.0150757		0.0165283			39.9	0.0040454	0.0061877	-0.00011963			39.9	0.00693	0.0057727			39.9	0.00021851	0.00017334	0.00016968			39.9	0.00013306	0.00012939				39.9	0.00759277	0.005896	0.00671387
		40	0.0150513		0.0165771			40	0.0040381	0.0062036	-0.00011963			40	0.00696	0.005752			40	0.00021606	0.00017334	0.00016968			40	0.00013306	0.00013062				40	0.00759277	0.0059082	0.00673828
		40.1	0.0150513		0.0164795			40.1	0.0040247	0.0062073	-0.00011841			40.1	0.00694	0.005791			40.1	0.0002124	0.00017212	0.00016968			40.1	0.00013428	0.00013062				40.1	0.00756836	0.005896	0.00673828
		40.2	0.0150146		0.0165649			40.2	0.004021	0.0062012	-0.00011963			40.2	0.00694	0.0058008			40.2	0.0002124	0.00017212	0.00016968			40.2	0.0001355	0.00012939				40.2	0.00759277	0.00588379	0.00672607
		40.3	0.0150391		0.0165283			40.3	0.0040344	0.0061829	-0.00011963			40.3	0.00693	0.0057983			40.3	0.00021118	0.00017212	0.00016968			40.3	0.00013428	0.00012939				40.3	0.00759277	0.0059082	0.00673828
		40.4	0.0150146		0.0164429			40.4	0.0040417	0.006189	-0.00011963			40.4	0.00694	0.0057849			40.4	0.00020996	0.00017334	0.00016968			40.4	0.00013428	0.00012939				40.4	0.00759277	0.005896	0.0067627
		40.5	0.0150635		0.0164551			40.5	0.0040454	0.0061902	-0.00012085			40.5	0.00694	0.00578			40.5	0.00021362	0.00017334	0.00016846			40.5	0.00013428	0.00012939				40.5	0.00761719	0.00588379	0.00678711
		40.6	0.0150513		0.0164795			40.6	0.0040442	0.0061938	-0.00011963					0.00578			40.6	0.00021729	0.00017456	0.0001709			40.6	0.00013306	0.00012939				40.6	0.00759277	0.00592041	0.0067749
		40.7	0.0150635		0.0165283			40.7	0.0040369	0.0061963	-0.00011963					0.0057861			40.7	0.00021973	0.00017334	0.0001709			40.7	0.0001355	0.00012939				40.7	0.00760498	0.00592041	0.0067627
		40.8	0.0150757		0.0164795			40.8	0.0040308	0.0061926	-0.00011841					0.0057837			40.8	0.00022095	0.00017334	0.00016968			40.8	0.00013306	0.00012817				40.8	0.00762939	0.00588379	0.00675049
		40.9	0.0150146		0.0165283			40.9	0.0040405	0.0061914	-0.00011963					0.0057959			40.9	0.00022095	0.00017212	0.00016968			40.9	0.00013306	0.00012817				40.9	0.0076416	0.00594482	0.00673828
		41	0.0150024		0.0165161			41	0.0040271	0.0061694	-0.00011841					0.0057898			41	0.00021973	0.00017334	0.00016968			41	0.00013428	0.00013062				41	0.00761719	0.00593262	0.00672607
		41.1	0.0149902		0.0165161			41.1	0.0040247	0.0061963	-0.00011963					0.0057947			41.1	0.00021973	0.00017456	0.00016968			41.1	0.0001355	0.00012939				41.1	0.00759277	0.00593262	0.00681152
		41.2	0.0150635		0.0165649			41.2	0.0040308	0.0062036	-0.00011841					0.0057886			41.2	0.00021973	0.00017334	0.0001709			41.2	0.00013794	0.00013062				41.2	0.00760498	0.00594482	0.00678711
		41.3	0.0150757		0.0164917			41.3	0.0040308	0.0062061	-0.00011841					0.0057825			41.3	0.00021973	0.00017212	0.00016968			41.3	0.00013428	0.00013062				41.3	0.00759277	0.00594482	0.0067749
		41.4	0.0150513		0.0165283			41.4	0.0040149	0.0062048	-0.00011841					0.0057678			41.4	0.00021973	0.00017334	0.00016968			41.4	0.00013672	0.00012939				41.4	0.00762939	0.00592041	0.00679932
		41.5	0.0150757		0.0165649			41.5	0.004043	0.0061975	-0.00011963					0.0057422			41.5	0.00022095	0.00017334	0.00016968			41.5	0.00013428	0.00012939				41.5	0.00761719	0.00593262	0.00679932
		41.6	0.0150635		0.0165039			41.6	0.0040332	0.0061768	-0.00011963					0.0057239			41.6	0.00021973	0.00017334	0.0001709			41.6	0.00013794	0.00013062				41.6	0.00761719	0.00593262	0.00678711
		41.7	0.0150513		0.0166138			41.7	0.0040393	0.0061975	-0.00011841					0.0057263			41.7	0.00021973	0.00017334	0.00016846			41.7	0.0001355	0.00013062				41.7	0.00760498	0.00593262	0.0067749
		41.8	0.0150635		0.0165283			41.8	0.0040393	0.0061951	-0.00011841					0.0057227			41.8	0.00022217	0.00017212	0.00016968			41.8	0.00013794	0.00013062				41.8	0.00762939	0.00593262	0.00679932
		41.9	0.0150757		0.0164063			41.9	0.0040405	0.0061938	-0.00011841					0.0057007			41.9	0.00022583	0.00017334	0.00016968			41.9	0.00013428	0.00012939				41.9	0.00759277	0.00593262	0.00682373
		42	0.0150635		0.016272			42	0.0040234	0.0061975	-0.00011963					0.0057532			42	0.00022461	0.00017456	0.0001709			42	0.00013672	0.00012939				42	0.00761719	0.00593262	0.00682373
		42.1	0.0150513							0.0061829	-0.00011963					0.0057446			42.1	0.00022583	0.00017334	0.00016968			42.1	0.0001355	0.00013062				42.1	0.00762939	0.00594482	0.00678711
		42.2	0.0150513							0.0061731	-0.00012085					0.0057422			42.2	0.00022583	0.00017334	0.00016846			42.2	0.00013794	0.00013062				42.2	0.00761719	0.00595703	0.00679932
		42.3	0.0150269							0.0061707	-0.00011963					0.0057336			42.3	0.00022705	0.00017334	0.00016968			42.3	0.00013794	0.00013184				42.3	0.00762939	0.00595703	0.00681152
		42.4	0.0151001							0.0061792	-0.00011841					0.0057373			42.4	0.00022583	0.00017456	0.00016968			42.4	0.00013794	0.00013062				42.4	0.00762939	0.00598145	0.00678711
		42.5	0.0150391							0.0061792	-0.00011963					0.0057373			42.5	0.00022461	0.00017334	0.00016968			42.5	0.00013672	0.00013184				42.5	0.00761719	0.00598145	0.00682373
		42.6	0.0150635							0.0061755	-0.00011963					0.0057471			42.6	0.00022461	0.00017334	0.00016968			42.6	0.00013672	0.00013428				42.6	0.0076416	0.00596924	0.00678711
		42.7	0.0150635							0.0061853	-0.00011963					0.0057703			42.7	0.00022705	0.00017334	0.00016968			42.7	0.00013672	0.00013306				42.7	0.00765381	0.00595703	0.0067749
		42.8	0.0150269							0.006178	-0.00011841					0.0057678			42.8	0.00022827	0.00017456	0.00016968			42.8	0.00013794	0.00013184				42.8	0.0076416	0.00596924	0.00678711
		42.9	0.0149902							0.0061646	-0.00011841					0.0057581			42.9	0.00023071	0.00017334	0.0001709			42.9	0.00013672	0.00013184				42.9	0.00765381	0.00596924	0.00673828
		43	0.0150269							0.0061792	-0.00011841					0.0057593			43	0.00023071	0.00017212	0.00016968			43	0.00013916	0.00013184				43	0.00765381	0.00596924	0.0067627
		43.1	0.0149902							0.006178	-0.00011963					0.0057556			43.1	0.00022827	0.00017334	0.0001709			43.1	0.0001355	0.00013306				43.1	0.00762939	0.00596924	0.00675049
		43.2	0.014978							0.0061816	-0.00011841					0.0057422			43.2	0.00022827	0.00017334	0.0001709			43.2	0.00014038	0.00013428				43.2	0.00761719	0.00600586	0.00678711
		43.3	0.0149902							0.0061841	-0.00011841					0.0057483			43.3	0.00021729	0.00017456	0.0001709			43.3	0.00014038	0.00013062				43.3	0.00762939	0.00599365	0.0067749
		43.4	0.014978							0.0061829	-0.00011841					0.0057446			43.4	0.00021973	0.00017334	0.00016968			43.4	0.0001355	0.00013184				43.4	0.00765381	0.00603027	0.00678711
		43.5	0.014978							0.0061719	-0.00012085					0.0057642			43.5	0.00022339	0.00017334	0.00016968			43.5	0.00013916	0.0001355				43.5	0.0076416	0.00603027	0.00678711
		43.6	0.0150513							0.0061792	-0.00011963					0.0057678			43.6	0.00022583	0.00017334	0.00016846			43.6	0.0001355	0.00013306				43.6	0.00762939	0.00603027	0.00681152
		43.7	0.0150757							0.0061816	-0.00011841					0.0057605			43.7	0.00022217	0.00017334	0.00016968			43.7	0.00014038	0.00013428				43.7	0.00762939	0.00601807	0.00679932
		43.8	0.0150146							0.0061768	-0.00011841					0.00573			43.8	0.00022095	0.00017456	0.0001709			43.8	0.00013672	0.00013306				43.8	0.0076416	0.00601807	0.00679932
		43.9	0.0150146							0.0061816	-0.00011963					0.0057471			43.9	0.00022461	0.00017456	0.00016968			43.9	0.00013794	0.00013428				43.9	0.00766602	0.00600586	0.00679932
		44	0.0150391							0.0061841	-0.00012085					0.0057629			44	0.00022705	0.00017212	0.00016968			44	0.00013916	0.00013306				44	0.00766602	0.00601807	0.0067749
		44.1	0.0150391							0.0061707	-0.00011963					0.0057666			44.1	0.00022827	0.00017456	0.0001709			44.1	0.00013916	0.00013428				44.1	0.0076416	0.00601807	0.00678711
		44.2	0.0150024							0.0061755	-0.00011963					0.0057751			44.2	0.00022949	0.00017456	0.0001709			44.2	0.00013672	0.00013428				44.2	0.00765381	0.00603027	0.00679932
		44.3	0.0150757							0.0061804	-0.00011963					0.0057751			44.3	0.00022949	0.00017334	0.00016968			44.3	0.00013916	0.00013184				44.3	0.00762939	0.00603027	0.00679932
		44.4	0.0150757							0.0061829	-0.00011963					0.0057751			44.4	0.00022827	0.00017334	0.00016846			44.4	0.00013916	0.00013428				44.4	0.00761719	0.00601807	0.00682373
		44.5	0.0150513							0.0061853	-0.00011963					0.0057898			44.5	0.00022949	0.00017334	0.00016968			44.5	0.00014038	0.00013428				44.5	0.0076416	0.00600586	0.00681152
		44.6	0.0150391							0.0061938	-0.00011841					0.0057947			44.6	0.00022949	0.00017334	0.00016968			44.6	0.00013916	0.0001355				44.6	0.00762939	0.00598145	0.00681152
		44.7	0.0151001							0.0061804	-0.00011963					0.005802			44.7	0.00022949	0.00017212	0.00016968			44.7	0.00014038	0.00013184				44.7	0.00765381	0.00603027	0.00678711
		44.8	0.0150146							0.0061658	-0.00011841					0.0057983			44.8	0.00022827	0.00017212	0.00016968			44.8	0.00014038	0.00013428				44.8	0.0076416	0.00603027	0.00678711
		44.9	0.0151123							0.0061816	-0.00011841					0.005802			44.9	0.00022827	0.00017212	0.00016968			44.9	0.00014038	0.0001355				44.9	0.0076416	0.00604248	0.00679932
		45	0.0151123							0.0061707	-0.00011841					0.0057935			45	0.00022949	0.00017334	0.00016968			45	0.00014038	0.00013428				45	0.0076416	0.00601807	0.00679932
		45.1	0.0151001							0.0061755	-0.00011841								45.1	0.00022949	0.00017334	0.0001709			45.1	0.0001416	0.00013428				45.1	0.0076416	0.00601807	0.00681152
		45.2	0.0150635							0.0061804	-0.00011963								45.2	0.00022827	0.00017212	0.00016846			45.2	0.0001416	0.0001355				45.2	0.00767822	0.00601807	0.00679932
		45.3	0.0150757							0.0061755	-0.00011963								45.3	0.00022827	0.00017334	0.00016968			45.3	0.0001416	0.00013428				45.3	0.00765381	0.00603027	0.00682373
		45.4	0.0150635							0.0061584	-0.00011963								45.4	0.00022949	0.00017456	0.00016968			45.4	0.0001416	0.00013428				45.4	0.00769043	0.00604248	0.00678711
		45.5	0.0151123							0.006167	-0.00011841								45.5	0.00022949	0.00017578	0.00016968			45.5	0.00014282	0.0001355				45.5	0.00767822	0.00606689	0.00679932
		45.6	0.0151489							0.0061658	-0.00011963								45.6	0.00023071	0.00017334	0.0001709			45.6	0.00013916	0.0001355				45.6	0.00766602	0.00606689	0.00681152
		45.7	0.0151733							0.0061584	-0.00011963								45.7	0.00022827	0.00017334	0.0001709			45.7	0.00014038	0.0001355				45.7	0.00766602	0.00606689	0.00681152
		45.8	0.0152344							0.0061694	-0.00011963								45.8	0.00023071	0.00017456	0.00017212			45.8	0.00013916	0.00013428				45.8	0.00766602	0.00605469	0.00682373
		45.9	0.0152832							0.0061682	-0.00011963								45.9	0.00022827	0.00017334	0.00017212			45.9	0.00014038	0.00013428				45.9	0.00767822	0.00604248	0.00679932
		46	0.0152466							0.0061462	-0.00011963								46	0.00022827	0.00017334	0.0001709			46	0.0001416	0.0001355				46	0.00766602	0.00604248	0.00678711
		46.1	0.015271							0.0061633	-0.00011841								46.1	0.00022583	0.00017334	0.00016968			46.1	0.0001416	0.0001355				46.1	0.00767822	0.0060791	0.00679932
		46.2	0.015271							0.0061743	-0.00011963								46.2	0.00022827	0.00017334	0.00016968			46.2	0.00014404	0.00013306				46.2	0.00769043	0.00606689	0.00682373
		46.3	0.0152344							0.0061768	-0.00011963								46.3	0.00022949	0.00017334	0.00016968			46.3	0.0001416	0.0001355				46.3	0.00766602	0.0060791	0.00681152
		46.4	0.0152954							0.006167	-0.00011963								46.4	0.00022949	0.00017334	0.00016968			46.4	0.0001416	0.0001355				46.4	0.00770264	0.0060791	0.00682373
		46.5	0.015332							0.0061768	-0.00011963								46.5	0.00022705	0.00017212	0.00016968			46.5	0.00013916	0.0001355				46.5	0.00770264	0.00606689	0.00682373
		46.6	0.0153809							0.0061646	-0.00011963								46.6	0.00022827	0.00017334	0.00016968			46.6	0.0001416	0.0001355				46.6	0.00769043	0.00605469	0.00682373
		46.7	0.0153809							0.0061584	-0.00011841								46.7	0.00022827	0.00017334	0.00016968			46.7	0.00014038	0.00013672				46.7	0.00770264	0.0060791	0.00679932
		46.8	0.0154297							0.006178	-0.00011841								46.8	0.00022827	0.00017456	0.00016968			46.8	0.0001416	0.0001355				46.8	0.00767822	0.00609131	0.00681152
		46.9	0.0154175							0.0061694	-0.00011841								46.9	0.00022949	0.00017334	0.00016846			46.9	0.00014282	0.0001355				46.9	0.00767822	0.00610352	0.00679932
		47	0.0154541							0.0061719	-0.00011841								47	0.00022949	0.00017334	0.00016846			47	0.00014282	0.0001355				47	0.00770264	0.0060791	0.00682373
		47.1	0.0155518							0.0061707	-0.00011963								47.1	0.00023071	0.00017456	0.00016846			47.1	0.00014404	0.00013428				47.1	0.00771484	0.0060791	0.00683594
		47.2	0.0155884							0.0061719	-0.00011963								47.2	0.00022827	0.00017456	0.00016968			47.2	0.00014526	0.00013428				47.2	0.00769043	0.00610352	0.00684814
		47.3	0.0155762							0.006145	-0.00012085								47.3	0.00022949	0.00017334	0.00016968			47.3	0.0001416	0.00013672				47.3	0.00770264	0.00609131	0.00682373
		47.4	0.0156738							0.0061633	-0.00011841								47.4	0.00022827	0.00017334	0.00016968			47.4	0.0001416	0.0001355				47.4	0.00770264	0.00610352	0.00684814
		47.5	0.0156128							0.0061658	-0.00011963								47.5	0.00022827	0.00017456	0.00016968			47.5	0.00014282	0.00013672				47.5	0.00765381	0.0060791	0.00686035
		47.6	0.0156128							0.0061707	-0.00011963								47.6	0.00022827	0.00017456	0.00016846			47.6	0.00014282	0.00013672				47.6	0.00766602	0.0060791	0.00687256
		47.7	0.0156616							0.0061682	-0.00011963								47.7	0.00022827	0.00017456	0.0001709			47.7	0.00014038	0.0001355				47.7	0.00767822	0.00610352	0.00684814
		47.8	0.0156982							0.0061658	-0.00011841								47.8	0.00022705	0.00017334	0.00016968			47.8	0.0001416	0.00013672				47.8	0.00767822	0.0060791	0.00686035
		47.9	0.0157349							0.0061572	-0.00011719								47.9	0.00022705	0.00017334	0.00016968			47.9	0.00014404	0.00013794				47.9	0.00769043	0.00610352	0.00683594
		48	0.0158936							0.0061621	-0.00011963								48	0.00022705	0.00017334	0.00016968			48	0.00014404	0.00013794				48	0.00769043	0.00609131	0.00682373
		48.1	0.0159546							0.0061707	-0.00011963								48.1	0.00022827	0.00017456	0.0001709			48.1	0.00014282	0.00013672				48.1	0.00766602	0.00610352	0.00683594
		48.2	0.0161011							0.0061743	-0.00012085								48.2	0.00022827	0.00017456	0.00016968			48.2	0.0001416	0.00013794				48.2	0.00769043	0.00612793	0.00679932
		48.3	0.0161987							0.0061658	-0.00011963								48.3	0.00022827	0.00017334	0.00016968			48.3	0.00014282	0.00013672				48.3	0.00769043	0.00611572	0.00681152
		48.4	0.016333							0.0061658	-0.00011963								48.4	0.00022949	0.00017334	0.00016968			48.4	0.00014282	0.00013794				48.4	0.00767822	0.0060791	0.00683594
		48.5	0.0164063								-0.00011841								48.5	0.00022949	0.00017334	0.00016968			48.5	0.00014404	0.00013672				48.5	0.00767822	0.00611572	0.00682373
		48.6	0.0164063								-0.00011841								48.6	0.00023071	0.00017456	0.00016968			48.6	0.00014282	0.0001355				48.6	0.00769043	0.00610352	0.00679932
		48.7	0.0165405								-0.00011963								48.7	0.00022949	0.00017578	0.00016968			48.7	0.00014404	0.00013672				48.7	0.00769043	0.00614014	0.00683594
		48.8	0.0166382								-0.00011841								48.8	0.00022827	0.00017578	0.00016968			48.8	0.00014526	0.00013672				48.8	0.00772705	0.00614014	0.00683594
		48.9	0.0165771								-0.00011841								48.9	0.00022949	0.000177	0.0001709			48.9	0.00014526	0.00013916				48.9	0.00772705	0.00612793	0.00684814
		49	0.016626								-0.00011841								49	0.00022949	0.00017944	0.00016968			49	0.00014404	0.00013428				49	0.00772705	0.0060791	0.00683594
		49.1	0.0166016								-0.00011963								49.1	0.00022827	0.00017944	0.00016846			49.1	0.00014404	0.00013916				49.1	0.00772705	0.00611572	0.00682373
		49.2	0.0165039								-0.00011963								49.2	0.00022827	0.00017456	0.00016846			49.2	0.00014404	0.00013672				49.2	0.00772705	0.00612793	0.00682373
		49.3	0.0165405								-0.00011841								49.3	0.00022827	0.00017334	0.00016846			49.3	0.00014404	0.00013916				49.3	0.00767822	0.00612793	0.00683594
		49.4	0.0165405								-0.00011963								49.4	0.00022949	0.00016968	0.00016968			49.4	0.00014648	0.00013794				49.4	0.00772705	0.00614014	0.00683594
		49.5	0.0165283								-0.00011963								49.5	0.00022949	0.00016968	0.0001709			49.5	0.00014526	0.00013916				49.5	0.00772705	0.00615234	0.00683594
		49.6	0.0164795								-0.00011841								49.6	0.00022949	0.0001709	0.0001709			49.6	0.00014526	0.00013794				49.6	0.00772705	0.00614014	0.00683594
		49.7	0.0165039								-0.00011963								49.7	0.00022949	0.00017212	0.00016968			49.7	0.00014526	0.00013794				49.7	0.00773926	0.00612793	0.00683594
		49.8	0.0164917								-0.00011841								49.8	0.00022949	0.00017334	0.0001709			49.8	0.00014648	0.00013794				49.8	0.00772705	0.00612793	0.00686035
		49.9	0.0165161								-0.00011841								49.9	0.00022949	0.00017334	0.0001709			49.9	0.00014526	0.00013916				49.9	0.00770264	0.00614014	0.00686035
		50	0.0165283								-0.00011963								50	0.00022949	0.00017334	0.00016968			50	0.00014648	0.00013672				50	0.00770264	0.00616455	0.00684814
		50.1	0.0165161								-0.00011963								50.1	0.00022827	0.00017456	0.0001709			50.1	0.00014526	0.00013794				50.1	0.00771484	0.00614014	0.00686035
		50.2	0.0165039								-0.00011841								50.2	0.00022949	0.00017456	0.00016968			50.2	0.00014648	0.0001355				50.2	0.00771484	0.00615234	0.00687256
		50.3	0.0165527								-0.00011841								50.3	0.00022827	0.00017578	0.0001709			50.3	0.00014526	0.00013916				50.3	0.00771484	0.00615234	0.00688477
		50.4	0.0165161								-0.00011963								50.4	0.00022827	0.00017456	0.0001709			50.4	0.00014526	0.00013794				50.4	0.00771484	0.00616455	0.00686035
		50.5	0.0165161								-0.00011963								50.5	0.00022827	0.00017456	0.00017212			50.5	0.00014648	0.00013916				50.5	0.00771484	0.00615234	0.00684814
		50.6	0.0165894								-0.00011963								50.6	0.00022949	0.00017456	0.00016968			50.6	0.00014771	0.00013794				50.6	0.00772705	0.00616455	0.00684814
		50.7	0.0166016								-0.00012085								50.7	0.00022827	0.00017456	0.0001709			50.7	0.00014771	0.00013794				50.7	0.00773926	0.00616455	0.00684814
		50.8	0.0165649								-0.00011963								50.8	0.00022827	0.00017334	0.0001709			50.8	0.00014648	0.00013794				50.8	0.00775146	0.00618896	0.00684814
		50.9	0.0165771								-0.00011963								50.9	0.00022827	0.00017334	0.0001709			50.9	0.00014648	0.00013916				50.9	0.00773926	0.00616455	0.00684814
		51	0.0165894								-0.00011841								51	0.00022949	0.00017334	0.00016846			51	0.00014771	0.00013794				51	0.00775146	0.00616455	0.00686035
		51.1	0.0165527								-0.00011841								51.1	0.00023071	0.00017334	0.00016846			51.1	0.00014526	0.00013672				51.1	0.00773926	0.00617676	0.00682373
		51.2	0.0166382								-0.00011841								51.2	0.00022949	0.00017456	0.00016968			51.2	0.00014771	0.00013672				51.2	0.00771484	0.00618896	0.00683594
		51.3	0.016626								-0.00011841								51.3	0.00022949	0.00017334	0.0001709			51.3	0.00014526	0.00013672				51.3	0.00772705	0.00618896	0.00684814
		51.4	0.0165894								-0.00011963								51.4	0.00022827	0.00017334	0.00016968			51.4	0.00014771	0.00013794				51.4	0.00772705	0.00620117	0.00684814
		51.5	0.0165283								-0.00011963								51.5	0.00022949	0.00017334	0.00016968			51.5	0.00014771	0.00013916				51.5	0.00775146	0.00618896	0.00684814
		51.6	0.0165161								-0.00011841								51.6	0.00023071	0.00017456	0.00016968			51.6	0.00014771	0.00013794				51.6	0.00777588	0.00617676	0.00683594
		51.7	0.0165039								-0.00011841								51.7	0.00022827	0.00017334	0.0001709			51.7	0.00014893	0.00013916				51.7	0.00773926	0.00620117	0.00682373
		51.8	0.0166138								-0.00011841								51.8	0.00022949	0.00017456	0.00016968			51.8	0.00014648	0.00014038				51.8	0.00773926	0.00618896	0.00682373
		51.9	0.0165894								-0.00011841								51.9	0.00022827	0.00017334	0.00016968			51.9	0.00014893	0.00013916				51.9	0.00773926	0.00620117	0.00686035
		52	0.0165894								-0.00011963								52	0.00022705	0.00017334	0.0001709			52	0.00014648	0.00013794				52	0.00773926	0.00621338	0.00684814
		52.1	0.0166138								-0.00011841								52.1	0.00022949	0.00017456	0.0001709			52.1	0.00014893	0.00014038				52.1	0.00773926	0.00620117	0.00683594
		52.2	0.0165649								-0.00011841								52.2	0.00022827	0.00017334	0.0001709			52.2	0.00014648	0.00013794				52.2	0.00773926	0.00617676	0.00684814
		52.3	0.0165161								-0.00011963								52.3	0.00022949	0.00017456	0.00016968			52.3	0.00014771	0.00014038				52.3	0.00772705	0.00621338	0.00684814
		52.4	0.0166016								-0.00011963								52.4	0.00022827	0.00017334	0.0001709			52.4	0.00014648	0.00013672				52.4	0.00770264	0.00621338	0.00683594
		52.5	0.0166016								-0.00011841								52.5	0.00022949	0.00017456	0.0001709			52.5	0.00014893	0.00013916				52.5	0.00772705	0.00621338	0.00686035
		52.6	0.0165894								-0.00011841								52.6	0.00022827	0.00017334	0.0001709			52.6	0.00015015	0.00013916				52.6	0.00775146	0.00621338	0.00684814
		52.7	0.0165894								-0.00011841								52.7	0.00022827	0.00017212	0.0001709			52.7	0.00014648	0.00013794				52.7	0.00775146	0.00620117	0.00686035
		52.8	0.0165405								-0.00011963								52.8	0.00022827	0.00017456	0.0001709			52.8	0.00014893	0.00013916				52.8	0.00775146	0.00618896	0.00686035
		52.9	0.0165161								-0.00011963								52.9	0.00022949	0.00017212	0.00016968			52.9	0.00015015	0.00013916				52.9	0.00773926	0.00621338	0.00688477
		53	0.0165405								-0.00011963								53	0.00023071	0.00017334	0.0001709			53	0.00014648	0.00013916				53	0.00772705	0.00622559	0.00683594
		53.1	0.0165283								-0.00011841								53.1	0.00022827	0.00017334	0.00016968			53.1	0.00014771	0.00013794				53.1	0.00771484	0.00623779	0.00686035
		53.2	0.0165649								-0.00011963								53.2	0.00022949	0.00017456	0.00016968			53.2	0.00014771	0.00013916				53.2	0.00771484	0.00622559	0.00686035
		53.3	0.0165894								-0.00011963								53.3	0.00022949	0.00017334	0.00016968			53.3	0.00014893	0.00013794				53.3	0.00772705	0.00625	0.00687256
		53.4	0.0165405								-0.00011963								53.4	0.00022949	0.00017456	0.00016968			53.4	0.00014771	0.00014038				53.4	0.00772705	0.00622559	0.00686035
		53.5	0.0165283								-0.00011963								53.5	0.00022827	0.00017334	0.0001709			53.5	0.00014771	0.00014038				53.5	0.00773926	0.00623779	0.00687256
		53.6	0.0165527								-0.00011963								53.6	0.00022827	0.00017456	0.00016968			53.6	0.00015015	0.00013916				53.6	0.00772705	0.00623779	0.00684814
		53.7	0.0165405								-0.00011841								53.7	0.00022827	0.00017334	0.00016968			53.7	0.00015015	0.00013916				53.7	0.00773926	0.00626221	0.00687256
		53.8	0.0165283								-0.00011841								53.8	0.00022827	0.00017456	0.00016968			53.8	0.00014893	0.00013916				53.8	0.00777588	0.00622559	0.00688477
		53.9	0.0165283								-0.00011963								53.9	0.00022827	0.00017334	0.00016968			53.9	0.00014893	0.00013916				53.9	0.00777588	0.00623779	0.00688477
		54	0.0165283								-0.00011841								54	0.00022949	0.00017334	0.00016968			54	0.00014893	0.00013916				54	0.00778809	0.00621338	0.00688477
		54.1	0.0164795								-0.00011841								54.1	0.00022827	0.00017334	0.00016968			54.1	0.00014893	0.00013916				54.1	0.00777588	0.00621338	0.00689697
		54.2	0.0164673								-0.00011841								54.2	0.00022949	0.00017334	0.00016968			54.2	0.00014893	0.00013916				54.2	0.00777588	0.00621338	0.00687256
		54.3	0.0164673								-0.00011963								54.3	0.00022827	0.00017334	0.0001709			54.3	0.00014771	0.00014038				54.3	0.00776367	0.00621338	0.00686035
		54.4	0.0164551								-0.00011719								54.4	0.00022827	0.00017456	0.0001709			54.4	0.00015015	0.0001416				54.4	0.00772705	0.00622559	0.00687256
		54.5	0.0164795								-0.00011719								54.5	0.00022827	0.00017456	0.00016968			54.5	0.00014771	0.00013794				54.5	0.00773926	0.00623779	0.00687256
		54.6	0.0165039								-0.00011963								54.6	0.00022949	0.00017334	0.0001709			54.6	0.00014893	0.00013916				54.6	0.00775146	0.00622559	0.00687256
		54.7	0.0164917								-0.00011841								54.7	0.00022827	0.00017456	0.0001709			54.7	0.00014771	0.00013916				54.7	0.00775146	0.00620117	0.00687256
		54.8	0.0164063								-0.00011841								54.8	0.00022827	0.00017456	0.0001709			54.8	0.00014893	0.00013916				54.8	0.00775146	0.00623779	0.00688477
		54.9	0.0165649								-0.00011963								54.9	0.00023071	0.00017334	0.0001709			54.9	0.00014648	0.00013794				54.9	0.00771484	0.00625	0.00683594
		55	0.0165527								-0.00011963								55	0.00022949	0.00017334	0.00016968			55	0.00014648	0.00013916				55	0.00775146	0.00622559	0.00687256
		55.1	0.0166138								-0.00011841								55.1	0.00022827	0.00017334	0.00016968			55.1	0.00015015	0.00013916				55.1	0.00776367	0.00623779	0.00686035
		55.2	0.016626								-0.00011841								55.2	0.00022949	0.00017334	0.00016968			55.2	0.00014771	0.00013916				55.2	0.00775146	0.00625	0.00686035
		55.3	0.016626								-0.00011841								55.3	0.00022827	0.00017212	0.00016968			55.3	0.00015015	0.00014038				55.3	0.00776367	0.00623779	0.00683594
		55.4	0.0166382								-0.00011963								55.4	0.00022827	0.00017334	0.00016968			55.4	0.00014893	0.0001416				55.4	0.00775146	0.00623779	0.00686035
		55.5	0.0166626								-0.00011963								55.5	0.00022827	0.00017334	0.00016846			55.5	0.00015015	0.00014038				55.5	0.00771484	0.00625	0.00686035
		55.6	0.0166382								-0.00011841								55.6	0.00022827	0.00017334	0.00016968			55.6	0.00015137	0.0001416				55.6	0.00775146	0.00625	0.00687256
		55.7	0.0166748								-0.00011841								55.7	0.00022827	0.00017334	0.00016968			55.7	0.00015137	0.00014038				55.7	0.00777588	0.00623779	0.00687256
		55.8	0.0166138								-0.00011963								55.8	0.00022949	0.00017334	0.00016968			55.8	0.00014893	0.00013916				55.8	0.00776367	0.00625	0.00688477
		55.9	0.0166016								-0.00011963								55.9	0.00022827	0.00017334	0.00016846			55.9	0.00015015	0.00014038				55.9	0.00775146	0.00626221	0.00688477
		56	0.0166016								-0.00011963								56	0.00022827	0.00017456	0.00016846			56	0.00014893	0.00013916				56	0.00776367	0.00625	0.00690918
		56.1	0.0166504								-0.00011841								56.1	0.00022949	0.00017334	0.00016968			56.1	0.00014893	0.00014038				56.1	0.00773926	0.00626221	0.00688477
		56.2	0.0166504								-0.00011841								56.2	0.00022827	0.00017334	0.00016968			56.2	0.00014771	0.0001416				56.2	0.00777588	0.00628662	0.00688477
		56.3	0.0166382								-0.00011963								56.3	0.00022949	0.00017334	0.00016846			56.3	0.00014893	0.0001416				56.3	0.00778809	0.00628662	0.00689697
		56.4	0.016626								-0.00011841								56.4	0.00022827	0.00017334	0.00017212			56.4	0.00014771	0.00013916				56.4	0.00777588	0.00628662	0.00688477
		56.5	0.0166748								-0.00011719								56.5	0.00022949	0.00017212	0.0001709			56.5	0.00015137	0.00014038				56.5	0.00777588	0.00628662	0.00689697
		56.6	0.0166382								-0.00011841								56.6	0.00022827	0.00017334	0.00016968			56.6	0.00014893	0.0001416				56.6	0.00777588	0.00625	0.00688477
		56.7	0.016687								-0.00011963								56.7	0.00022827	0.00017212	0.00016968			56.7	0.00015015	0.00014038				56.7	0.00777588	0.00627441	0.00687256
		56.8	0.0166504								-0.00011963								56.8	0.00022705	0.00017212	0.00016846			56.8	0.00015137	0.00014038				56.8	0.00776367	0.00628662	0.00683594
		56.9	0.016626								-0.00011963								56.9	0.00022827	0.00017334	0.0001709			56.9	0.00014893	0.00014282				56.9	0.0078125	0.00628662	0.00684814
		57	0.016626								-0.00011841								57	0.00022705	0.00017334	0.00016968			57	0.00015015	0.0001416				57	0.00778809	0.00628662	0.00686035
		57.1	0.0166016								-0.00011841								57.1	0.00022827	0.00017456	0.00016968			57.1	0.00014893	0.00014038				57.1	0.00777588	0.00627441	0.00684814
		57.2	0.0165894								-0.00011963								57.2	0.00022827	0.00017456	0.00016968			57.2	0.00015137	0.00014038				57.2	0.00776367	0.00628662	0.00686035
		57.3	0.0165405								-0.00011963								57.3	0.00022827	0.00017456	0.00017212			57.3	0.00014893	0.00014038				57.3	0.00775146	0.00627441	0.00686035
		57.4	0.0166138								-0.00011841								57.4	0.00022827	0.00017456	0.00016968			57.4	0.00015015	0.0001416				57.4	0.00776367	0.00629883	0.00682373
		57.5	0.0166138								-0.00011841								57.5	0.00022827	0.00017212	0.00016968			57.5	0.00015137	0.00014038				57.5	0.00775146	0.00629883	0.00684814
		57.6	0.016626								-0.00011841								57.6	0.00022949	0.00017334	0.00016968			57.6	0.00015015	0.0001416				57.6	0.00777588	0.00628662	0.00687256
		57.7	0.016626								-0.00011963								57.7	0.00023071	0.00017456	0.00016968			57.7	0.00014893	0.0001416				57.7	0.00778809	0.00631104	0.00688477
		57.8	0.0166382								-0.00011841								57.8	0.00022949	0.00017334	0.0001709			57.8	0.00015381	0.00014282				57.8	0.00778809	0.00629883	0.00692139
		57.9	0.0166016								-0.00011841								57.9	0.00022949	0.00017334	0.0001709			57.9	0.00015137	0.0001416				57.9	0.00777588	0.00631104	0.00689697
		58	0.0166626								-0.00011841								58	0.00022949	0.00017212	0.00016968			58	0.00015259	0.0001416				58	0.00777588	0.00632324	0.00690918
											-0.00011841								58.1	0.00022949	0.00017212	0.00016968			58.1	0.00015015	0.00014282				58.1	0.00776367	0.00631104	0.00688477
											-0.00011841								58.2	0.00022949	0.00017334	0.00016968			58.2	0.00015015	0.0001416				58.2	0.00776367	0.00632324	0.00689697
											-0.00011841								58.3	0.00022949	0.00017334	0.00016968			58.3	0.00014893	0.00013916				58.3	0.0078125	0.00631104	0.00689697
											-0.00011841								58.4	0.00022949	0.00017334	0.00016968			58.4	0.00015137	0.0001416				58.4	0.00778809	0.00631104	0.00690918
											-0.00011841								58.5	0.00022949	0.00017334	0.00016968			58.5	0.00015015	0.0001416				58.5	0.00777588	0.00628662	0.00690918
											-0.00011841								58.6	0.00022949	0.00017334	0.0001709			58.6	0.00015137	0.0001416				58.6	0.00780029	0.00632324	0.00687256
											-0.00011719								58.7	0.00022949	0.00017334	0.0001709			58.7	0.00015015	0.00013916				58.7	0.00775146	0.00632324	0.00684814
											-0.00011719								58.8	0.00022827	0.00017334	0.0001709			58.8	0.00015137	0.00014038				58.8	0.00780029	0.00632324	0.00688477
											-0.00011841								58.9	0.00022949	0.00017334	0.00016846			58.9	0.00015137	0.0001416				58.9	0.00776367	0.00631104	0.00689697
											-0.00012085								59	0.00022827	0.00017456	0.00016968			59	0.00015015	0.0001416				59	0.00776367	0.00633545	0.00688477
											-0.00011719								59.1	0.00022827	0.00017334	0.00016968			59.1	0.00015381	0.00014282				59.1	0.00777588	0.00632324	0.00687256
											-0.00011719								59.2	0.00022827	0.00017334	0.0001709			59.2	0.00015015	0.00014038				59.2	0.00772705	0.00632324	0.00688477
											-0.00011841								59.3	0.00022705	0.00017212	0.00016846			59.3	0.00015015	0.00014038				59.3	0.00778809	0.00632324	0.00687256
											-0.00011719								59.4	0.00022827	0.00017334	0.00016968			59.4	0.00015137	0.00014404				59.4	0.00776367	0.00632324	0.00688477
											-0.00011719								59.5	0.00022827	0.00017212	0.0001709			59.5	0.00015137	0.00014038				59.5	0.00777588	0.00632324	0.00688477
											-0.00011963								59.6	0.00022827	0.00017334	0.0001709			59.6	0.00015015	0.0001416				59.6	0.00777588	0.00632324	0.00689697
											-0.00011841								59.7	0.00022949	0.00017334	0.00016968			59.7	0.00015137	0.0001416				59.7	0.00776367	0.00631104	0.00690918
											-0.00011841								59.8	0.00022949	0.00017334	0.00016846			59.8	0.00015137	0.00014404				59.8	0.00775146	0.00631104	0.00690918
											-0.00011841								59.9	0.00022949	0.00017334	0.00016968			59.9	0.00015259	0.0001416				59.9	0.00777588	0.00632324	0.00684814
											-0.00011841								60	0.00022949	0.00017334	0.0001709			60	0.00015381	0.0001416				60	0.00775146	0.00632324	0.00688477
											-0.00011841								60.1	0.00022949	0.00017212	0.00016968			60.1	0.00015259	0.0001416				60.1	0.00776367	0.00633545	0.00690918
											-0.00011719								60.2	0.00023071	0.000177	0.00016846			60.2	0.00015259	0.00014282				60.2	0.00777588	0.00634766	0.00692139
											-0.00011719								60.3	0.00023071	0.00017944	0.00016968			60.3	0.00015259	0.00014282				60.3	0.00777588	0.00634766	0.00692139
											-0.00011841								60.4	0.00022949	0.00018433	0.0001709			60.4	0.00015137	0.00014282				60.4	0.00776367	0.00632324	0.0069458
											-0.00011841								60.5	0.00022827	0.00018921	0.0001709			60.5	0.00015381	0.00014282				60.5	0.00778809	0.00634766	0.00690918
											-0.00011841								60.6	0.00022949	0.00019653	0.00016968			60.6	0.00015259	0.0001416				60.6	0.00780029	0.00634766	0.00687256
											-0.00011841								60.7	0.00022949	0.00020874	0.00016968			60.7	0.00015381	0.00014404				60.7	0.00778809	0.00635986	0.00689697
											-0.00011719								60.8	0.00022949	0.00021973	0.00016968			60.8	0.00015259	0.00014282				60.8	0.00780029	0.00637207	0.00687256
											-0.00011963								60.9	0.00022949	0.00022949	0.0001709			60.9	0.00015381	0.00014404				60.9	0.00776367	0.00637207	0.00690918
											-0.00011841								61	0.00022827	0.00023315	0.0001709			61	0.00015503	0.00014526				61	0.00776367	0.00633545	0.00693359
											-0.00011841								61.1	0.00022827	0.00023437	0.00016968			61.1	0.00015259	0.00014526				61.1	0.00777588	0.00635986	0.00692139
											-0.00011841								61.2	0.00023071	0.00023437	0.0001709			61.2	0.00015381	0.00014404				61.2	0.00778809	0.00635986	0.00689697
											-0.00011841								61.3	0.00022949	0.00022827	0.0001709			61.3	0.00015381	0.00014404				61.3	0.00778809	0.00635986	0.00690918
											-0.00011963								61.4	0.00022949	0.00022583	0.00016968			61.4	0.00015381	0.00014404				61.4	0.00778809	0.00637207	0.00690918
											-0.00011841								61.5	0.00022949	0.00022095	0.00016968			61.5	0.00015381	0.0001416				61.5	0.00777588	0.00637207	0.00690918
											-0.00011841								61.6	0.00023071	0.00021362	0.00016968			61.6	0.00015137	0.00014282				61.6	0.00775146	0.00635986	0.00692139
											-0.00011841								61.7	0.00022949	0.00020874	0.0001709			61.7	0.00015381	0.0001416				61.7	0.00777588	0.00635986	0.00690918
											-0.00011841								61.8	0.00022949	0.00020874	0.0001709			61.8	0.00015137	0.00014282				61.8	0.00777588	0.00637207	0.00686035
											-0.00011719								61.9	0.00022949	0.0002063	0.00016968			61.9	0.00015381	0.00014282				61.9	0.00778809	0.00635986	0.00690918
											-0.00011719								62	0.00022949	0.0002063	0.00016846			62	0.00015381	0.00014526				62	0.00780029	0.00639648	0.00690918
											-0.00011841								62.1	0.00022949	0.0002063	0.0001709			62.1	0.00015503	0.00014282				62.1	0.00778809	0.00638428	0.00689697
											-0.00011841								62.2	0.00022949	0.00020752	0.00016968			62.2	0.00015381	0.00014526				62.2	0.00778809	0.00637207	0.00688477
											-0.00011719								62.3	0.00022949	0.0002063	0.0001709			62.3	0.00015503	0.00014526				62.3	0.00775146	0.00635986	0.00690918
											-0.00011841								62.4	0.00022827	0.0002063	0.0001709			62.4	0.00015381	0.00014526				62.4	0.00778809	0.00640869	0.00693359
											-0.00011719								62.5	0.00022949	0.00020874	0.0001709			62.5	0.00015137	0.00014648				62.5	0.00780029	0.00640869	0.00689697
											-0.00011719								62.6	0.00022949	0.0002124	0.00016968			62.6	0.00015259	0.00014404				62.6	0.00777588	0.00639648	0.00693359
											-0.00011963								62.7	0.00022827	0.00021606	0.00016846			62.7	0.00015259	0.00014282				62.7	0.00777588	0.00638428	0.00690918
											-0.00011841								62.8	0.00022827	0.00021973	0.00016968			62.8	0.00015503	0.00014526				62.8	0.00777588	0.00639648	0.00690918
											-0.00011841								62.9	0.00022827	0.00022583	0.00016968			62.9	0.00015381	0.00014404				62.9	0.00777588	0.00637207	0.00690918
											-0.00011963								63	0.00022949	0.00022583	0.00016968			63	0.00015503	0.00014404				63	0.00780029	0.00638428	0.00690918
											-0.00011841								63.1	0.00022949	0.00022705	0.00016968			63.1	0.00015503	0.00014282				63.1	0.0078125	0.00638428	0.00687256
											-0.00011841								63.2	0.00022827	0.00022827	0.00016968			63.2	0.00015503	0.00014282				63.2	0.00778809	0.00639648	0.00688477
											-0.00011963								63.3	0.00022827	0.00022827	0.00016968			63.3	0.00015381	0.00014038				63.3	0.00780029	0.00638428	0.00687256
											-0.00011841								63.4	0.00022827	0.00022949	0.00016846			63.4	0.00015503	0.00014404				63.4	0.00778809	0.00639648	0.00688477
											-0.00011841								63.5	0.00022827	0.00023071	0.0001709			63.5	0.00015503	0.00014404				63.5	0.00776367	0.00639648	0.00688477
											-0.00011841								63.6	0.00022949	0.00023071	0.00016968			63.6	0.00015503	0.00014648				63.6	0.00778809	0.00637207	0.00689697
											-0.00011841								63.7	0.00022949	0.00023071	0.00016968			63.7	0.00015503	0.00014404				63.7	0.00777588	0.00637207	0.00688477
											-0.00011841								63.8	0.00022949	0.00023193	0.00016968			63.8	0.00015625	0.00014648				63.8	0.00777588	0.00638428	0.00690918
											-0.00011963								63.9	0.00023071	0.00023315	0.00016846			63.9	0.00015503	0.00014648				63.9	0.00777588	0.00639648	0.00692139
											-0.00011841								64	0.00022949	0.00023315	0.00016968			64	0.00015503	0.00014648				64	0.00778809	0.00639648	0.00692139
											-0.00011841								64.1	0.00022949	0.00023315	0.00016968			64.1	0.00015503	0.00014526				64.1	0.00777588	0.00638428	0.00692139
											-0.00011719								64.2	0.00022949	0.00023437	0.00016968			64.2	0.00015503	0.00014526				64.2	0.0078125	0.00637207	0.00692139
											-0.00011841								64.3	0.00022949	0.00023437	0.00016968			64.3	0.00015503	0.00014526				64.3	0.00780029	0.00638428	0.00692139
											-0.00011841								64.4	0.00022949	0.00023315	0.0001709			64.4	0.00015503	0.00014404				64.4	0.00778809	0.00639648	0.00690918
											-0.00011841								64.5		0.00023315	0.00016968			64.5	0.00015381	0.00014526				64.5	0.00780029	0.00638428	0.00690918
											-0.00011963								64.6		0.00023193	0.00017212			64.6	0.00015503	0.00014526				64.6	0.00780029	0.00639648	0.00692139
											-0.00011841								64.7		0.00023193	0.00017456			64.7	0.00015381	0.00014526				64.7	0.00780029	0.00640869	0.00692139
											-0.00011719								64.8		0.00023193	0.000177			64.8	0.00015503	0.00014526				64.8	0.00777588	0.00639648	0.00689697
											-0.00011719								64.9		0.00023193	0.000177			64.9	0.00015625	0.00014648				64.9	0.00777588	0.00640869	0.00689697
											-0.00011719								65		0.00023193	0.00017456			65	0.00015381	0.00014526				65	0.00778809	0.00640869	0.00689697
											-0.00011841								65.1		0.00023193	0.00016479			65.1	0.00015625	0.00014771				65.1	0.00778809	0.00640869	0.00689697
											-0.00011841								65.2		0.00023315	0.00016357			65.2	0.00015503	0.00014526				65.2	0.00780029	0.0064209	0.00689697
											-0.00011963								65.3		0.00023315	0.00016724			65.3	0.00015747	0.00014771				65.3	0.00778809	0.00640869	0.00690918
											-0.00011719								65.4		0.00023193	0.00016846			65.4	0.00015381	0.00014526				65.4	0.00778809	0.00640869	0.00692139
											-0.00011719								65.5		0.00023193	0.0001709			65.5	0.00015747	0.00014526				65.5	0.00780029	0.0064209	0.00689697
											-0.00011841								65.6		0.00023315	0.0001709			65.6	0.00015625	0.00014526				65.6	0.00780029	0.00643311	0.00689697
											-0.00011963								65.7		0.00023437	0.00016968			65.7	0.00015747	0.00014648				65.7	0.00780029	0.00643311	0.00688477
											-0.00011841								65.8		0.00023193	0.00016724			65.8	0.00015381	0.00014771				65.8	0.00782471	0.00643311	0.00689697
											-0.00011963								65.9		0.00023315	0.00016968			65.9	0.00015747	0.00014526				65.9	0.00778809	0.0064209	0.00690918
											-0.00011841								66		0.00023437	0.00016846			66	0.00015625	0.00014526				66	0.00777588	0.00640869	0.00692139
											-0.00011841								66.1		0.00023437	0.00016846			66.1	0.00015747	0.00014526				66.1	0.00780029	0.00640869	0.00690918
											-0.00011841								66.2		0.00023437	0.00016968			66.2	0.00015625	0.00014771				66.2	0.00778809	0.00640869	0.00689697
											-0.00011841								66.3		0.00023315	0.0001709			66.3	0.00015747	0.00014404				66.3	0.0078125	0.0064209	0.00690918
											-0.00011719								66.4		0.00023315	0.00016968			66.4	0.00015747	0.00014282				66.4	0.00780029	0.0064209	0.00693359
											-0.00011841								66.5		0.0002356	0.0001709			66.5	0.00015625	0.00014526				66.5	0.00780029	0.00644531	0.00693359
											-0.00011841								66.6		0.0002356	0.00016968			66.6	0.00015503	0.00014404				66.6	0.00778809	0.00643311	0.00692139
											-0.00011841								66.7		0.0002356	0.00016968			66.7	0.00015625	0.00014526				66.7	0.0078125	0.00644531	0.00693359
											-0.00011841								66.8		0.00023437	0.00016968			66.8	0.00015503	0.00014404				66.8	0.00782471	0.00644531	0.00692139
											-0.00011841								66.9		0.0002356	0.00016846			66.9	0.00015625	0.00014282				66.9	0.00780029	0.00644531	0.00688477
											-0.00011841								67		0.0002356	0.00016846			67	0.00015747	0.00014404				67	0.00782471	0.00643311	0.00690918
											-0.00011841								67.1		0.0002356	0.00016846			67.1	0.00015747	0.00014648				67.1	0.0078125	0.00643311	0.0069458
											-0.00011719								67.2		0.00023437	0.00016968			67.2	0.00015625	0.00014771				67.2	0.00777588	0.00645752	0.00693359
											-0.00011841								67.3		0.0002356	0.00016846			67.3	0.00015625	0.00014526				67.3	0.00782471	0.0064209	0.00693359
											-0.00011963								67.4		0.0002356	0.00016968			67.4	0.00015625	0.00014648				67.4	0.00783691	0.00643311	0.00692139
											-0.00011963								67.5		0.0002356	0.00016968			67.5	0.00015869	0.00014648				67.5	0.00782471	0.00644531	0.00690918
											-0.00011841								67.6		0.00023315	0.00016968			67.6	0.00015747	0.00014526				67.6	0.0078125	0.00645752	0.00692139
											-0.00011841								67.7		0.00023437	0.00016846			67.7	0.00015747	0.00014526				67.7	0.0078125	0.00645752	0.00690918
											-0.00011841								67.8		0.0002356	0.00016968			67.8	0.00015747	0.00014648				67.8	0.00777588	0.00646973	0.00689697
											-0.00011841								67.9		0.00023682	0.00016846			67.9	0.00015625	0.00014648				67.9	0.0078125	0.00644531	0.00689697
											-0.00011841								68		0.0002356	0.00016968			68	0.00015625	0.00014526				68	0.0078125	0.00644531	0.00689697
											-0.00011841								68.1		0.00023682	0.00016968			68.1	0.00015625	0.00014404				68.1	0.00780029	0.00645752	0.00688477
											-0.00011841								68.2		0.0002356	0.00016846			68.2	0.00015747	0.00014648				68.2	0.00782471	0.00646973	0.00688477
											-0.00011841								68.3		0.0002356	0.00016968			68.3	0.00015625	0.00014526				68.3	0.0078125	0.00646973	0.00690918
											-0.00011841								68.4		0.0002356	0.00016846			68.4	0.00015503	0.00014526				68.4	0.00778809	0.00645752	0.00689697
											-0.00011841								68.5		0.0002356	0.00016846			68.5	0.00015869	0.00014526				68.5	0.00778809	0.00645752	0.00690918
											-0.00011841								68.6		0.00023682	0.00016846			68.6	0.00015747	0.00015015				68.6	0.0078125	0.00645752	0.00692139
											-0.00011841								68.7		0.00023682	0.00016968			68.7	0.00015869	0.00014526				68.7	0.0078125	0.00646973	0.00692139
											-0.00011841								68.8		0.0002356	0.00016846			68.8	0.00015747	0.00014526				68.8	0.0078125	0.00645752	0.00692139
											-0.00011841								68.9		0.0002356	0.00016968			68.9	0.00015747	0.00014526				68.9	0.00780029	0.00648193	0.00693359
											-0.00011963								69		0.00023682	0.00016846			69	0.00015747	0.00014648				69	0.00777588	0.00648193	0.00693359
											-0.00011841								69.1		0.00023804	0.00016968			69.1	0.00015625	0.00014526				69.1	0.00780029	0.00646973	0.00692139
											-0.00011841								69.2		0.00023682	0.00016968			69.2	0.00015747	0.00014526				69.2	0.00780029	0.00645752	0.00690918
											-0.00011841								69.3		0.0002356	0.00016968			69.3	0.00015625	0.00014526				69.3	0.00778809	0.00649414	0.00693359
											-0.00011963								69.4		0.00023437	0.00016968			69.4	0.00015869	0.00014526				69.4	0.00780029	0.00646973	0.00689697
											-0.00011719								69.5		0.00023682	0.00016846			69.5	0.00015869	0.00014771				69.5	0.00778809	0.00646973	0.00692139
											-0.00011841								69.6		0.00023682	0.00016846			69.6	0.00015625	0.00014526				69.6	0.00780029	0.00646973	0.00688477
											-0.00011841								69.7		0.0002356	0.00016968			69.7	0.00015747	0.00014648				69.7	0.00777588	0.00646973	0.00687256
											-0.00011841								69.8		0.0002356	0.00016846			69.8	0.00015747	0.00014648				69.8	0.00783691	0.00648193	0.00687256
											-0.00011963								69.9		0.00023682	0.00016724			69.9	0.00015747	0.00014526				69.9	0.00782471	0.00648193	0.00689697
											-0.00011841								70		0.00023682	0.00016846			70	0.00015503	0.00014526				70	0.00782471	0.00649414	0.00692139
											-0.00011841								70.1		0.0002356	0.00016968			70.1	0.00015625	0.00014771				70.1	0.00783691	0.00651855	0.00693359
											-0.00011719								70.2		0.0002356	0.00016846			70.2	0.00015869	0.00014526				70.2	0.00782471	0.00649414	0.00693359
											-0.00011719								70.3		0.00023682	0.00016968			70.3	0.00015747	0.00014404				70.3	0.00780029	0.00649414	0.00695801
											-0.00011841								70.4		0.00023682	0.00016846			70.4	0.00015747	0.00014648				70.4	0.00783691	0.00649414	0.0069458
											-0.00011841								70.5		0.00023682	0.00016846			70.5	0.00015747	0.00014648				70.5	0.00786133	0.00649414	0.00693359
											-0.00011841								70.6		0.0002356	0.00016968			70.6	0.00015747	0.00014648				70.6	0.00784912	0.00649414	0.00692139
											-0.00011719								70.7		0.0002356	0.0001709			70.7	0.00015869	0.00014771				70.7	0.00782471	0.00650635	0.00692139
											-0.00011841								70.8		0.00023682	0.00016846			70.8	0.00015869	0.00014648				70.8	0.00782471	0.00649414	0.00692139
											-0.00011719								70.9		0.00023682	0.00016968			70.9	0.00015747	0.00014771				70.9	0.0078125	0.00649414	0.00693359
											-0.00011719								71		0.0002356	0.00016968			71	0.00015869	0.00014648				71	0.00783691	0.00650635	0.00692139
											-0.00011719								71.1		0.00023437	0.00016846			71.1	0.00015747	0.00014526				71.1	0.00783691	0.00648193	0.00692139
											-0.00011719								71.2		0.0002356	0.00016968			71.2	0.00015625	0.00014648				71.2	0.00782471	0.00650635	0.00692139
											-0.00011841								71.3		0.0002356	0.00016968			71.3	0.00015625	0.00014526				71.3	0.00783691	0.00651855	0.00689697
											-0.00011841								71.4		0.00023804	0.00016968			71.4	0.00015991	0.00014648				71.4	0.00784912	0.00651855	0.00693359
											-0.00011719								71.5		0.00023804	0.00016846			71.5	0.00015747	0.00014526				71.5	0.0078125	0.00650635	0.0069458
											-0.00011719								71.6		0.00023682	0.00016968			71.6	0.00015991	0.00014893				71.6	0.00782471	0.00651855	0.00693359
											-0.00011841								71.7		0.00023804	0.00016968			71.7	0.00015747	0.00014771				71.7	0.00784912	0.00653076	0.00693359
											-0.00011841								71.8		0.00023682	0.00016968			71.8	0.00015747	0.00014771				71.8	0.00786133	0.00651855	0.00693359
											-0.00011841								71.9		0.00023682	0.0001709			71.9	0.00015991	0.00014771				71.9	0.00786133	0.00653076	0.00692139
											-0.00011841								72		0.00023682	0.0001709			72	0.00015869	0.00014648				72	0.00786133	0.00654297	0.00693359
											-0.00011597								72.1		0.00023682	0.00016968			72.1	0.00015747	0.00014771				72.1	0.00783691	0.00654297	0.0069458
											-0.00011719								72.2		0.00023682	0.0001709			72.2	0.00015991	0.00014771				72.2	0.00782471	0.00654297	0.00692139
											-0.00011841								72.3		0.0002356	0.00016968			72.3	0.00016113	0.00014404				72.3	0.00782471	0.00654297	0.00693359
											-0.00011841								72.4		0.00023804	0.0001709			72.4	0.00015991	0.00014771				72.4	0.00784912	0.00653076	0.00693359
											-0.00011841								72.5		0.00023682	0.00016968			72.5	0.00015747	0.00014648				72.5	0.00782471	0.00653076	0.00692139
											-0.00011719								72.6		0.0002356	0.0001709			72.6	0.00015747	0.00014771				72.6	0.00782471	0.00651855	0.00693359
											-0.00011719								72.7		0.00023682	0.0001709			72.7	0.00015869	0.00014648				72.7	0.00782471	0.00653076	0.00692139
											-0.00011841								72.8		0.00023682	0.00016968			72.8	0.00015869	0.00014648				72.8	0.0078125	0.00651855	0.00693359
											-0.00011841								72.9		0.00023682	0.00016968			72.9	0.00015869	0.00014526				72.9	0.00782471	0.00654297	0.00692139
											-0.00011841								73		0.00023682	0.00016968			73	0.00016113	0.00014648				73	0.00782471	0.00653076	0.00692139
											-0.00011841								73.1		0.00023804	0.00016968			73.1	0.00015747	0.00014771				73.1	0.00782471	0.00654297	0.00690918
											-0.00011841								73.2		0.00023682	0.00016968			73.2	0.00015869	0.00014648				73.2	0.00783691	0.00654297	0.00690918
											-0.00011719								73.3		0.0002356	0.00016968			73.3	0.00015869	0.00014893				73.3	0.0078125	0.00653076	0.00693359
											-0.00011719								73.4		0.00023682	0.00016846			73.4	0.00015625	0.00014893				73.4	0.00780029	0.00655518	0.00693359
											-0.00011841								73.5		0.00023804	0.0001709			73.5	0.00015869	0.00014648				73.5	0.00783691	0.00654297	0.00690918
											-0.00011841								73.6		0.00023682	0.00016968			73.6	0.00015869	0.00014771				73.6	0.00782471	0.00651855	0.00692139
											-0.00011719								73.7		0.00023682	0.0001709			73.7	0.00015869	0.00014648				73.7	0.00783691	0.00653076	0.00692139
											-0.00011719								73.8		0.00023926	0.00016968			73.8	0.00015991	0.00014648				73.8	0.00782471	0.00655518	0.00690918
											-0.00011719								73.9		0.00023804	0.00016968			73.9	0.00015747	0.00014526				73.9	0.0078125	0.00654297	0.00695801
											-0.00011841								74		0.00023926	0.0001709			74	0.00015747	0.00014771				74	0.0078125	0.00654297	0.00695801
											-0.00011841								74.1		0.00023804	0.0001709			74.1	0.00016113	0.00014526				74.1	0.00786133	0.00656738	0.00697021
											-0.00011841								74.2		0.00023682	0.0001709			74.2	0.00015869	0.00014771				74.2	0.00783691	0.00656738	0.00697021
											-0.00011719								74.3		0.00023682	0.00016968			74.3	0.00015869	0.00014771				74.3	0.00782471	0.00653076	0.00697021
											-0.00011719								74.4		0.00023804	0.00016846			74.4	0.00015869	0.00014893				74.4	0.00782471	0.00657959	0.00693359
											-0.00011841								74.5		0.00023804	0.0001709			74.5	0.00015747	0.00014648				74.5	0.0078125	0.00656738	0.00693359
											-0.00011841								74.6		0.0002356	0.00017334			74.6	0.00015869	0.00014771				74.6	0.0078125	0.00656738	0.0069458
											-0.00011841								74.7		0.0002356	0.0001709			74.7	0.00015869	0.00014648				74.7	0.00782471	0.00657959	0.00695801
											-0.00011719								74.8		0.00023682	0.0001709			74.8	0.00015625	0.00014771				74.8	0.00783691	0.00657959	0.0069458
											-0.00011963								74.9		0.00023804	0.00017456			74.9	0.00015869	0.00014893				74.9	0.00782471	0.00654297	0.0069458
											-0.00011719								75		0.00023804	0.00017944			75	0.00016113	0.00014648				75	0.00783691	0.0065918	0.00695801
											-0.00011719								75.1		0.00023682	0.00017822			75.1	0.00016113	0.00014893				75.1	0.00783691	0.0065918	0.00695801
											-0.00011841								75.2		0.00023804	0.00017578			75.2	0.00015747	0.00014771				75.2	0.00782471	0.00657959	0.00697021
											-0.00011719								75.3		0.00023804	0.00017334			75.3	0.00015991	0.00014893				75.3	0.00782471	0.0065918	0.00699463
											-0.00011841								75.4		0.00023804	0.00016968			75.4	0.00015991	0.00014648				75.4	0.00782471	0.0065918	0.00697021
											-0.00011841								75.5		0.00023682	0.00015015			75.5	0.00015869	0.00014771				75.5	0.00783691	0.00657959	0.00698242
											-0.00011719								75.6		0.00023804	0.00016357			75.6	0.00015991	0.00014771				75.6	0.00783691	0.00656738	0.00697021
											-0.00011841								75.7		0.00023682	0.0001709			75.7	0.00015869	0.00014771				75.7	0.00784912	0.00656738	0.00695801
											-0.00011841								75.8		0.00023804	0.0001709			75.8	0.00015991	0.00014771				75.8	0.00784912	0.00656738	0.00695801
											-0.00011841								75.9		0.00023804	0.0001709			75.9	0.00015869	0.00014771				75.9	0.00783691	0.00657959	0.0069458
											-0.00011841								76		0.00023682	0.00016968			76	0.00015869	0.00014771				76	0.00784912	0.00657959	0.0069458
											-0.00011841								76.1		0.00023804	0.00016968			76.1	0.00015869	0.00014771				76.1	0.00783691	0.00657959	0.00695801
											-0.00011841								76.2		0.00023926	0.0001709			76.2	0.00015869	0.00014648				76.2	0.00784912	0.00656738	0.0069458
											-0.00011719								76.3		0.00023804	0.00016968			76.3	0.00016235	0.00014648				76.3	0.00786133	0.0065918	0.00693359
											-0.00011841								76.4		0.00023682	0.0001709			76.4	0.00015991	0.00014771				76.4	0.00786133	0.0065918	0.00692139
											-0.00011841								76.5		0.00023682	0.0001709			76.5	0.00015869	0.00014771				76.5	0.00787354	0.00657959	0.00693359
											-0.00011841								76.6		0.00023804	0.00017212			76.6	0.00015625	0.00014771				76.6	0.00788574	0.0065918	0.00695801
											-0.00011597								76.7		0.00023804	0.00016968			76.7	0.00015869	0.00014648				76.7	0.00784912	0.0065918	0.0069458
											-0.00011719								76.8		0.00023804	0.0001709			76.8	0.00015747	0.00014893				76.8	0.00787354	0.00657959	0.0069458
											-0.00011841								76.9		0.00023804	0.0001709			76.9	0.00015991	0.00014648				76.9	0.00787354	0.00657959	0.0069458
											-0.00011719								77		0.00023926	0.0001709			77	0.00015869	0.00014648				77	0.00787354	0.0065918	0.00693359
											-0.00011719								77.1		0.00023804	0.00017212			77.1	0.00015991	0.00014893				77.1	0.00786133	0.00657959	0.00693359
											-0.00011719								77.2		0.00023682	0.00017212			77.2	0.00015991	0.00014526				77.2	0.00784912	0.0065918	0.00693359
											-0.00011597								77.3		0.00023804	0.0001709			77.3	0.00015991	0.00014893				77.3	0.00786133	0.006604	0.00695801
											-0.00011719								77.4		0.00023926	0.0001709			77.4	0.00016113	0.00014771				77.4	0.00787354	0.00657959	0.00693359
											-0.00011841								77.5		0.00023804	0.00017212			77.5	0.00015747	0.00014893				77.5	0.00784912	0.006604	0.0069458
											-0.00011841								77.6		0.00023682	0.00017334			77.6	0.00015991	0.00014648				77.6	0.00784912	0.00661621	0.0069458
											-0.00011841								77.7		0.00023804	0.0001709			77.7	0.00015869	0.00014771				77.7	0.00780029	0.0065918	0.00695801
											-0.00011719								77.8		0.00023804	0.0001709			77.8	0.00015991	0.00014771				77.8	0.00784912	0.00661621	0.0069458
											-0.00011719								77.9		0.00023804	0.00017212			77.9	0.00015869	0.00014771				77.9	0.00786133	0.00661621	0.0069458
											-0.00011719								78		0.00023804	0.00017212			78	0.00015869	0.00014648				78	0.00784912	0.006604	0.00693359
											-0.00011841								78.1		0.00023804	0.00017212			78.1	0.00015991	0.00014893				78.1	0.00788574	0.006604	0.00698242
											-0.00011719								78.2		0.00023804	0.00017212			78.2	0.00015991	0.00014771				78.2	0.00784912	0.00662842	0.00698242
											-0.00011719								78.3		0.00023804	0.0001709			78.3	0.00016113	0.00014648				78.3	0.00782471	0.006604	0.00698242
											-0.00011841								78.4		0.00023804	0.00017212			78.4	0.00015991	0.00014648				78.4	0.00786133	0.006604	0.00699463
											-0.00011719								78.5		0.00023804	0.0001709			78.5	0.00015869	0.00015015				78.5	0.00784912	0.0065918	0.00698242
											-0.00011719								78.6		0.00023804	0.00017212			78.6	0.00015869	0.00014771				78.6	0.00784912	0.006604	0.00695801
											-0.00011719								78.7		0.00023804	0.0001709			78.7	0.00015991	0.00014893				78.7	0.00786133	0.00657959	0.00697021
											-0.00011841								78.8		0.00023804	0.00017212			78.8	0.00015991	0.00014771				78.8	0.00786133	0.0065918	0.0069458
											-0.00011841								78.9		0.00023682	0.0001709			78.9	0.00016113	0.00014893				78.9	0.00783691	0.006604	0.00695801
											-0.00011597								79		0.00023682	0.00017212			79	0.00015869	0.00014771				79	0.00786133	0.006604	0.00698242
											-0.00011719								79.1			0.0001709			79.1	0.00015869	0.00014771				79.1	0.00787354	0.00662842	0.00698242
											-0.00011719								79.2			0.0001709			79.2	0.00015991	0.00014893				79.2	0.00787354	0.00664063	0.00698242
											-0.00011719								79.3			0.0001709			79.3	0.00015991	0.00015015				79.3	0.00787354	0.00662842	0.00697021
											-0.00011719								79.4			0.0001709			79.4	0.00015991	0.00015015				79.4	0.00787354	0.006604	0.00697021
											-0.00011841								79.5			0.00017578			79.5	0.00015991	0.00014771				79.5	0.00783691	0.00664063	0.00697021
											-0.00011719								79.6			0.00017944			79.6	0.00016113	0.00014771				79.6	0.00783691	0.00662842	0.00698242
											-0.00011597								79.7			0.00017944			79.7	0.00015869	0.00014648				79.7	0.00786133	0.00662842	0.00700684
											-0.00011719								79.8			0.00017944			79.8	0.00015991	0.00014771				79.8	0.00786133	0.00662842	0.00695801
											-0.00011719								79.9			0.00018066			79.9	0.00015869	0.00014893				79.9	0.00786133	0.00665283	0.00695801
											-0.00011597								80			0.00018066			80	0.00016113	0.00014648				80	0.00786133	0.00661621	0.00698242
											-0.00011719								80.1			0.00018555			80.1	0.00015991	0.00014771				80.1	0.00784912	0.00664063	0.00698242
											-0.00011719								80.2			0.00019165			80.2	0.00016113	0.00014771				80.2	0.00783691	0.00662842	0.00699463
											-0.00011719								80.3			0.00019409			80.3	0.00016113	0.00014893				80.3	0.00784912	0.00666504	0.00699463
											-0.00011841								80.4			0.00019653			80.4	0.00015991	0.00015015				80.4	0.00784912	0.00665283	0.00697021
											-0.00011719								80.5			0.00019897			80.5	0.00015869	0.00014893				80.5	0.00787354	0.00665283	0.00695801
											-0.00011841								80.6			0.00020142			80.6	0.00015991	0.00014648				80.6	0.00787354	0.00661621	0.00693359
											-0.00011597								80.7			0.00020264			80.7	0.00015991	0.00015015				80.7	0.00787354	0.00664063	0.00693359
											-0.00011719								80.8			0.00020142			80.8	0.00016113	0.00015015				80.8	0.00784912	0.00665283	0.00695801
											-0.00011719								80.9			0.00020264			80.9	0.00015991	0.00014526				80.9	0.00787354	0.00667725	0.00695801
											-0.00011719								81			0.0002063			81	0.00015869	0.00014771				81	0.00788574	0.00666504	0.0069458
											-0.00011597								81.1			0.00020752			81.1	0.00016113	0.00014771				81.1	0.00789795	0.00665283	0.00697021
											-0.00011841								81.2			0.00021118			81.2	0.00015991	0.00014771				81.2	0.00788574	0.00665283	0.0069458
											-0.00011963								81.3			0.00021118			81.3	0.00015869	0.00014771				81.3	0.00787354	0.00665283	0.00695801
											-0.00011841								81.4			0.00021118			81.4	0.00015991	0.00014648				81.4	0.00786133	0.00664063	0.00692139
											-0.00011597								81.5			0.0002124			81.5	0.00015869	0.00014648				81.5	0.00786133	0.00666504	0.0069458
											-0.00011719								81.6			0.00021484			81.6	0.00015991	0.00014771				81.6	0.00787354	0.00666504	0.00695801
											-0.00011719								81.7			0.00021606			81.7	0.00016113	0.00014648				81.7	0.00789795	0.00666504	0.0069458
											-0.00011719								81.8			0.00021851			81.8	0.00016113	0.00014771				81.8	0.00788574	0.00666504	0.00697021
											-0.00011841								81.9			0.00021973			81.9	0.00016113	0.00014771				81.9	0.00789795	0.00666504	0.0069458
											-0.00011719								82			0.00021973			82	0.00015991	0.00014771				82	0.00784912	0.00667725	0.00693359
											-0.00011719								82.1			0.00021973			82.1	0.00016113	0.00014893				82.1	0.00786133	0.00666504	0.00695801
											-0.00011719								82.2			0.00021851			82.2	0.00015747	0.00014771				82.2	0.00788574	0.00667725	0.0069458
											-0.00011719								82.3			0.00021851			82.3	0.00016113	0.00014893				82.3	0.00787354	0.00667725	0.00693359
											-0.00011597								82.4			0.00021973			82.4	0.00016113	0.00014771				82.4	0.00787354	0.00667725	0.00698242
											-0.00011597								82.5			0.00021851			82.5	0.00016113	0.00014648				82.5	0.00787354	0.00665283	0.00697021
											-0.00011719								82.6			0.00021851			82.6	0.00016113	0.00014648				82.6	0.00788574	0.00668945	0.00695801
											-0.00011597								82.7			0.00021851			82.7	0.00016113	0.00014648				82.7	0.00787354	0.00670166	0.00695801
											-0.00011597								82.8			0.00021851			82.8	0.00016113	0.00014771				82.8	0.00786133	0.00670166	0.00699463
											-0.00011597								82.9			0.00021973			82.9	0.00016479	0.00015015				82.9	0.00787354	0.00670166	0.00698242
											-0.00011597								83			0.00021851			83	0.00016724	0.00014771				83	0.00789795	0.00671387	0.00697021
											-0.00011597								83.1			0.00021729			83.1	0.00016968	0.00014893				83.1	0.00788574	0.00668945	0.00698242
											-0.00011597								83.2			0.00021729			83.2	0.00016968	0.00014771				83.2	0.00787354	0.00672607	0.00698242
											-0.00011719								83.3			0.00021851			83.3	0.00016968	0.00015015				83.3	0.00787354	0.00671387	0.00695801
											-0.00011719								83.4			0.00021729			83.4	0.0001709	0.00014893				83.4	0.00789795	0.00670166	0.00698242
											-0.00011719								83.5			0.00021851			83.5	0.00017334	0.00014771				83.5	0.00788574	0.00670166	0.00698242
											-0.00011719								83.6			0.00021851			83.6	0.00017456	0.00014893				83.6	0.00788574	0.00670166	0.00697021
											-0.00011719								83.7			0.00021851			83.7	0.00017334	0.00014771				83.7	0.00789795	0.00670166	0.00697021
											-0.00011597								83.8			0.00021851			83.8	0.00017334	0.00014893				83.8	0.00789795	0.00670166	0.00697021
											-0.00011719								83.9			0.00021851			83.9	0.00017212	0.00014771				83.9	0.00789795	0.00672607	0.0069458
											-0.00011719								84			0.00021851			84	0.0001709	0.00014771				84	0.00789795	0.00673828	0.00697021
											-0.00011597								84.1			0.00021851			84.1	0.00017334	0.00014648				84.1	0.00788574	0.00671387	0.0069458
											-0.00011597								84.2			0.00021851			84.2	0.00017334	0.00014648				84.2	0.00788574	0.00673828	0.0069458
											-0.00011597								84.3			0.00021729			84.3	0.0001709	0.00014648				84.3	0.00788574	0.00672607	0.00695801
											-0.00011719								84.4			0.00021729			84.4	0.00017212	0.00014771				84.4	0.00788574	0.00668945	0.00697021
											-0.00011719								84.5			0.00021851			84.5	0.00016968	0.00015015				84.5	0.00789795	0.00670166	0.00695801
											-0.00011719								84.6			0.00021851			84.6	0.00016968	0.00014771				84.6	0.00792236	0.00670166	0.0069458
											-0.00011719								84.7			0.00021851			84.7	0.0001709	0.00014771				84.7	0.00788574	0.00670166	0.00697021
											-0.00011719								84.8			0.00021729			84.8	0.0001709	0.00014893				84.8	0.00787354	0.00672607	0.00698242
											-0.00011719								84.9			0.00021851			84.9	0.00017212	0.00014771				84.9	0.00787354	0.00672607	0.00697021
											-0.00011719								85			0.00021729			85	0.00017212	0.00014893				85	0.00788574	0.00668945	0.00695801
											-0.00011597								85.1			0.00021484			85.1	0.00017334	0.00014893				85.1	0.00784912	0.00671387	0.00695801
											-0.00011597								85.2			0.00021606			85.2	0.00017334	0.00014771				85.2	0.00788574	0.00673828	0.00695801
											-0.00011597								85.3			0.00021484			85.3	0.00017212	0.00014648				85.3	0.00789795	0.00672607	0.00695801
											-0.00011597								85.4			0.00021606			85.4	0.00017456	0.00014893				85.4	0.00791016	0.00672607	0.00697021
											-0.00011719								85.5			0.00021729			85.5	0.00017456	0.00014893				85.5	0.00791016	0.00672607	0.00697021
											-0.00011597								85.6			0.00021851			85.6	0.00017578	0.00014893				85.6	0.00791016	0.00672607	0.00698242
											-0.00011597								85.7			0.00021973			85.7	0.000177	0.00014893				85.7	0.00789795	0.00670166	0.00697021
											-0.00011597								85.8			0.00022217			85.8	0.00017578	0.00014771				85.8	0.00791016	0.00672607	0.0069458
											-0.00011719								85.9			0.00022217			85.9	0.000177	0.00014648				85.9	0.00791016	0.00673828	0.00697021
											-0.00011597								86			0.00021362			86	0.00017944	0.00014893				86	0.00792236	0.00675049	0.00697021
											-0.00011597								86.1			0.00020996			86.1	0.00017822	0.00015015				86.1	0.00791016	0.00673828	0.00699463
											-0.00011597								86.2			0.00020874			86.2	0.00018066	0.00014771				86.2	0.00791016	0.00673828	0.00700684
											-0.00011597								86.3			0.00021362			86.3	0.00017944	0.00014771				86.3	0.00788574	0.00670166	0.00701904
											-0.00011719								86.4			0.00021606			86.4	0.00017822	0.00014648				86.4	0.00788574	0.00673828	0.00697021
											-0.00011719								86.5			0.00021729			86.5	0.00018066	0.00014893				86.5	0.00789795	0.00673828	0.00699463
											-0.00011597								86.6			0.00021729			86.6	0.00018066	0.00014771				86.6	0.00791016	0.00673828	0.00698242
											-0.00011719								86.7			0.00021851			86.7	0.00018311	0.00015015				86.7	0.00791016	0.00673828	0.00698242
											-0.00011719								86.8			0.00021851			86.8	0.00018066	0.00014893				86.8	0.00791016	0.00675049	0.00698242
											-0.00011719								86.9			0.00021851			86.9	0.00018433	0.00014771				86.9	0.00789795	0.00671387	0.00699463
											-0.00011841								87			0.00021729			87	0.00018433	0.00014771				87	0.00788574	0.00675049	0.00697021
											-0.00011597								87.1			0.00021851			87.1	0.00018188	0.00014771				87.1	0.00788574	0.0067749	0.00698242
											-0.00011597								87.2			0.00021851			87.2	0.00018311	0.00014771				87.2	0.00789795	0.00675049	0.00699463
											-0.00011719								87.3			0.00021851			87.3	0.00018555	0.00014648				87.3	0.00789795	0.0067627	0.00699463
											-0.00011719								87.4			0.00021851			87.4	0.00018555	0.00014893				87.4	0.00791016	0.0067627	0.00701904
											-0.00011719								87.5			0.00021729			87.5	0.00018677	0.00014648				87.5	0.00788574	0.00672607	0.00700684
											-0.00011597								87.6			0.00021851			87.6	0.00018921	0.00015015				87.6	0.00789795	0.00671387	0.00700684
											-0.00011597								87.7			0.00021851			87.7	0.00018799	0.00014893				87.7	0.00788574	0.00675049	0.00695801
											-0.00011597								87.8			0.00021851			87.8	0.00018555	0.00014893				87.8	0.00788574	0.00675049	0.00698242
											-0.00011719								87.9			0.00021729			87.9	0.00018799	0.00015015				87.9	0.00791016	0.0067627	0.00699463
											-0.00011475								88			0.00021851			88	0.00018799	0.00014893				88	0.00791016	0.0067627	0.00699463
											-0.00011719								88.1			0.00021851			88.1	0.00018555	0.00014893				88.1	0.00788574	0.00675049	0.00699463
											-0.00011597								88.2			0.00021973			88.2	0.00018677	0.00015015				88.2	0.00787354	0.00673828	0.00700684
											-0.00011597								88.3			0.00021606			88.3	0.00018799	0.00014893				88.3	0.00789795	0.0067749	0.00699463
											-0.00011597								88.4			0.00021729			88.4	0.00018921	0.00014893				88.4	0.00789795	0.0067627	0.00698242
											-0.00011597								88.5			0.00021851			88.5	0.00019043	0.00015137				88.5	0.00789795	0.00675049	0.00698242
											-0.00011597								88.6			0.00021851			88.6	0.00019043	0.00014771				88.6	0.00788574	0.00675049	0.00699463
											-0.00011597								88.7			0.00021973			88.7	0.00018799	0.00014771				88.7	0.00787354	0.00675049	0.00697021
											-0.00011719								88.8			0.00021606			88.8	0.00018677	0.00014893				88.8	0.00784912	0.00671387	0.00695801
											-0.00011597								88.9			0.00021851			88.9	0.00018677	0.00014893				88.9	0.00787354	0.00672607	0.00695801
											-0.00011597								89			0.00021973			89	0.00018921	0.00014893				89	0.00786133	0.00671387	0.00697021
											-0.00011475								89.1			0.00021851			89.1	0.00018799	0.00015015				89.1	0.00788574	0.00675049	0.00698242
											-0.00011597								89.2			0.00021851			89.2	0.00018555	0.00015015				89.2	0.00784912	0.00673828	0.00698242
											-0.00011597								89.3			0.00021851			89.3	0.00018799	0.00014893				89.3	0.00786133	0.0067627	0.00698242
											-0.00011475								89.4			0.00021729			89.4	0.00019043	0.00014893				89.4	0.00783691	0.00675049	0.00695801
											-0.00011597								89.5			0.00021851			89.5	0.00018677	0.00015259				89.5	0.00784912	0.00675049	0.00695801
											-0.00011597								89.6			0.00021729			89.6	0.00019165	0.00015503				89.6	0.00787354	0.00678711	0.00695801
											-0.00011597								89.7			0.00021729			89.7	0.00018921	0.00015503				89.7	0.00786133	0.0067749	0.00699463
											-0.00011597								89.8			0.00021851			89.8	0.00018921	0.00015747				89.8	0.00786133	0.00679932	0.00699463
											-0.00011475								89.9			0.00021851			89.9	0.00018921	0.00015991				89.9	0.00787354	0.00678711	0.00703125
											-0.00011597								90			0.00021851			90	0.00018921	0.00016235				90	0.00784912	0.0067749	0.00704346
											-0.00011719								90.1			0.00021606			90.1	0.00018921	0.00016357				90.1	0.00786133	0.0067627	0.00704346
											-0.00011719								90.2			0.00021851			90.2	0.00019165	0.00016235				90.2	0.00787354	0.0067749	0.00701904
											-0.00011597								90.3			0.00021729			90.3	0.00019165	0.00016479				90.3	0.00787354	0.0067749	0.00705566
											-0.00011597								90.4			0.00021851			90.4	0.00018799	0.00016846				90.4	0.00787354	0.00679932	0.00703125
											-0.00011475								90.5			0.00021606			90.5	0.00019165	0.00016602				90.5	0.00787354	0.00679932	0.00701904
											-0.00011597								90.6			0.00021606			90.6	0.00019043	0.00016846				90.6	0.00784912	0.00679932	0.00704346
											-0.00011597								90.7			0.00021729			90.7	0.00018921	0.00016968				90.7	0.00787354	0.0067627	0.00703125
											-0.00011597								90.8			0.00021851			90.8	0.00019165	0.00017212				90.8	0.00788574	0.00679932	0.00701904
											-0.00011597								90.9			0.00021729			90.9	0.00019165	0.00017334				90.9	0.00787354	0.00678711	0.00698242
											-0.00011597								91			0.00021729			91	0.00019043	0.00017212				91	0.00788574	0.00679932	0.0069458
											-0.00011719								91.1			0.00021729			91.1	0.00019165	0.00017456				91.1	0.00789795	0.00682373	0.00701904
											-0.00011475								91.2			0.00021729			91.2	0.00019043	0.00017334				91.2	0.00787354	0.00681152	0.00703125
											-0.00011475								91.3			0.00021606			91.3	0.00019165	0.00017456				91.3	0.00787354	0.00679932	0.00703125
											-0.00011597								91.4			0.00021606			91.4	0.00019043	0.00017578				91.4	0.00788574	0.0067749	0.00700684
											-0.00011719								91.5			0.00021606			91.5	0.00019287	0.00017456				91.5	0.00788574	0.00681152	0.00701904
											-0.00011475								91.6			0.00021729			91.6	0.00019409	0.00017578				91.6	0.00789795	0.00679932	0.00703125
											-0.00011475								91.7			0.00021729			91.7	0.00019287	0.00017456				91.7	0.00789795	0.00678711	0.00705566
											-0.00011597								91.8			0.00021729			91.8	0.00019043	0.000177				91.8	0.00789795	0.00681152	0.00705566
											-0.00011475								91.9			0.00021729			91.9	0.00019165	0.00017822				91.9	0.00789795	0.00678711	0.00717773
											-0.00011597								92			0.00021729			92	0.00018921	0.00017944				92	0.00787354	0.0067627	0.00721436
											-0.00011597								92.1			0.00021729			92.1	0.00019165	0.00017822				92.1	0.00787354	0.00678711	0.00718994
											-0.00011475								92.2			0.00021729			92.2	0.00019165	0.00018066				92.2	0.00787354	0.00678711	0.00716553
											-0.00011475								92.3			0.00021729			92.3	0.00019165	0.00018311				92.3	0.00789795	0.00679932	0.00712891
											-0.00011475								92.4			0.00021729			92.4	0.00019287	0.00018188				92.4	0.00789795	0.00679932	0.00712891
											-0.00011475								92.5			0.00021973			92.5	0.00019531	0.00018433				92.5	0.00787354	0.00679932	0.00712891
											-0.00011719								92.6			0.00021729			92.6	0.00019287	0.00018555				92.6	0.00791016	0.00679932	0.00716553
											-0.00011597								92.7			0.00021729			92.7	0.00019409	0.00018555				92.7	0.00791016	0.00678711	0.00717773
											-0.00011597								92.8			0.00021729			92.8	0.00019409	0.00018921				92.8	0.00787354	0.00679932	0.00726318
											-0.00011597								92.9			0.00021729			92.9	0.00019287	0.00018921				92.9	0.00791016	0.00681152	0.00733643
											-0.00011719								93			0.00021973			93	0.00019287	0.00019165				93	0.00789795	0.00682373	0.00739746
											-0.00011597								93.1			0.00021729			93.1	0.00019165	0.00019287				93.1	0.00786133	0.00683594	0.00744629
											-0.00011475								93.2			0.00021851			93.2	0.00019287	0.00019043				93.2	0.00788574	0.00679932	0.00748291
											-0.00011597								93.3			0.00021851			93.3	0.00019409	0.00019531				93.3	0.00789795	0.00681152	0.00748291
											-0.00011475								93.4			0.00021973			93.4	0.00019287	0.00019653				93.4	0.00789795	0.00681152	0.00753174
											-0.00011597								93.5			0.00021606			93.5	0.00019287	0.00019653				93.5	0.00791016	0.00683594	0.00758057
											-0.00011597								93.6			0.00021729			93.6	0.00019409	0.00019409				93.6	0.00791016	0.00683594	0.00762939
											-0.00011597								93.7			0.00021729			93.7	0.00019409	0.00019775				93.7	0.00788574	0.00683594	0.00767822
											-0.00011475								93.8			0.00021973			93.8	0.00019531	0.00019653				93.8	0.00788574	0.00683594	0.00773926
											-0.00011597								93.9			0.00021851			93.9	0.00019165	0.00019409				93.9	0.00791016	0.00681152	0.00777588
											-0.00011597								94			0.00021851			94	0.00019409	0.00019775				94	0.00788574	0.00683594	0.0078125
											-0.00011719								94.1			0.00021729			94.1	0.00019287	0.00019409				94.1	0.00791016	0.00681152	0.0078125
											-0.00011719								94.2			0.00021729			94.2	0.00019043	0.00019409				94.2	0.00792236	0.00681152	0.00780029
											-0.00011597								94.3			0.00021851			94.3	0.00019409	0.00019653				94.3	0.00789795	0.00683594	0.00776367
											-0.00011597								94.4			0.00021851			94.4	0.00019653	0.00019531				94.4	0.00788574	0.00682373	0.00773926
											-0.00011719								94.5			0.00021606			94.5	0.00019165	0.00019287				94.5	0.00788574	0.00682373	0.00773926
											-0.00011597								94.6			0.00021729			94.6	0.00019531	0.00019531				94.6	0.00791016	0.00683594	0.00775146
											-0.00011597								94.7			0.00021851			94.7	0.00019287	0.00019531				94.7	0.00791016	0.00683594	0.00778809
											-0.00011597								94.8			0.00021729			94.8	0.00019531	0.00019775				94.8	0.00788574	0.00683594	0.00778809
											-0.00011597								94.9			0.00021729			94.9	0.00019409	0.00019287				94.9	0.00782471	0.00682373	0.00777588
											-0.00011597								95			0.00021851			95	0.00019287	0.00019653				95	0.00786133	0.00681152	0.00780029
											-0.00011719								95.1			0.00021851			95.1	0.00019531	0.00019165				95.1	0.00794678	0.00683594	0.00778809
											-0.00011597								95.2			0.00021851			95.2	0.00019165	0.00019287				95.2	0.00791016	0.00682373	0.00777588
											-0.00011475								95.3			0.00021851			95.3	0.00019531	0.00019287				95.3	0.00789795	0.00684814	0.00778809
											-0.00011719								95.4			0.00021729			95.4	0.00019409	0.00019409				95.4	0.00793457	0.00683594	0.0078125
											-0.00011597								95.5			0.00021851			95.5	0.00019287	0.00019287				95.5	0.00799561	0.00684814	0.00782471
											-0.00011475								95.6			0.00021851			95.6	0.00019531	0.00019165				95.6	0.00795898	0.00684814	0.00780029
											-0.00011475								95.7			0.00021851			95.7	0.00019409	0.00019165				95.7	0.00806885	0.00683594	0.00777588
											-0.00011475								95.8			0.00021851			95.8	0.00019409	0.00019531				95.8	0.00819092	0.00683594	0.00777588
											-0.00011475								95.9			0.00021851			95.9	0.00019409	0.00019287				95.9	0.00827637	0.00686035	0.00776367
											-0.00011475								96			0.00021851			96	0.00019287	0.00019165				96	0.0083252	0.00686035	0.00780029
											-0.00011597								96.1			0.00021851			96.1	0.00019653	0.00019165				96.1	0.00839844	0.00686035	0.0078125
											-0.00011475								96.2			0.00021729			96.2	0.00019409	0.00019287				96.2	0.00845947	0.00683594	0.00777588
											-0.00011475								96.3			0.00021606			96.3	0.00019409	0.00019287				96.3	0.0085083	0.00684814	0.00777588
											-0.00011597								96.4			0.00021851			96.4	0.00019531	0.00019287				96.4	0.00855713	0.00683594	0.00775146
											-0.00011597								96.5			0.00021851			96.5	0.00019531	0.00019043				96.5	0.00859375	0.00683594	0.00775146
											-0.00011475								96.6			0.00021729			96.6	0.00019531	0.00019165				96.6	0.00859375	0.00686035	0.00780029
											-0.00011597								96.7			0.00021729			96.7	0.00019531	0.00019409				96.7	0.00858154	0.00684814	0.0078125
											-0.00011597								96.8			0.00021729			96.8	0.00019409	0.00019287				96.8	0.00859375	0.00686035	0.0078125
											-0.00011597								96.9			0.00021729			96.9	0.00019409	0.00019165				96.9	0.00869141	0.00686035	0.00783691
											-0.00011719								97			0.00021729			97	0.00019531	0.00019287				97	0.00871582	0.00684814	0.00782471
											-0.00011597								97.1			0.00021606			97.1	0.00019409	0.00019409				97.1	0.00874023	0.00684814	0.00777588
											-0.00011475								97.2			0.00021729			97.2	0.00019531	0.00019531				97.2	0.00877686	0.00686035	0.00778809
											-0.00011475								97.3			0.00021729			97.3	0.00019531	0.00019165				97.3	0.00878906	0.00686035	0.0078125
											-0.00011475								97.4			0.00021851			97.4	0.00019409	0.00019165				97.4	0.00877686	0.00686035	0.00780029
											-0.00011597								97.5			0.00021973			97.5	0.00019409	0.00019043				97.5	0.00881348	0.00684814	0.00783691
											-0.00011475								97.6			0.00021729			97.6	0.00019653	0.00019165				97.6	0.00883789	0.00684814	0.00784912
											-0.00011475								97.7			0.00021729			97.7	0.00019653	0.00019287				97.7	0.00883789	0.00686035	0.00783691
											-0.00011597								97.8			0.00021606			97.8	0.00019287	0.00019165				97.8	0.00882568	0.00687256	0.00783691
											-0.00011597								97.9			0.00021729			97.9	0.00019653	0.00019043				97.9	0.00881348	0.00688477	0.00784912
											-0.00011597								98			0.00021606			98	0.00019287	0.00019165				98	0.00881348	0.00688477	0.00787354
											-0.00011475								98.1			0.00021851			98.1	0.00019409	0.00018921				98.1	0.00878906	0.00687256	0.00788574
											-0.00011597								98.2			0.00021729			98.2	0.00019409	0.00018921				98.2	0.00878906	0.00687256	0.00787354
											-0.00011597								98.3			0.00021729			98.3	0.00019287	0.00018799				98.3	0.00877686	0.00686035	0.00783691
											-0.00011597								98.4			0.00021851			98.4	0.00019409	0.00019165				98.4	0.00877686	0.00688477	0.00784912
											-0.00011475								98.5			0.00021729			98.5	0.00019531	0.00018921				98.5	0.00877686	0.00688477	0.00784912
											-0.00011475								98.6			0.00021729			98.6	0.00019531	0.00019043				98.6	0.00877686	0.00687256	0.00786133
											-0.00011475								98.7			0.00021729			98.7	0.00019409	0.00019043				98.7	0.00877686	0.00687256	0.00788574
											-0.00011597								98.8			0.00021729			98.8	0.00019531	0.00019165				98.8	0.00878906	0.00687256	0.00789795
											-0.00011597								98.9			0.00021729			98.9	0.00019287	0.00019043				98.9	0.00878906	0.00686035	0.00789795
											-0.00011475								99			0.00021729			99	0.00019531	0.00019165				99	0.00880127	0.00686035	0.00789795
											-0.00011353								99.1			0.00021851			99.1	0.00019653	0.00019043				99.1	0.00877686	0.00688477	0.00789795
											-0.00011475								99.2			0.00021851			99.2	0.00019409	0.00019043				99.2	0.00874023	0.00688477	0.00787354
											-0.00011475								99.3			0.00021729			99.3	0.00019409	0.00019043				99.3	0.00874023	0.00689697	0.00786133
											-0.00011475								99.4			0.00021851			99.4	0.00019531	0.00019043				99.4	0.00876465	0.00689697	0.00787354
											-0.00011353								99.5			0.00021851			99.5	0.00019653	0.00019043				99.5	0.00878906	0.00689697	0.00787354
											-0.00011475								99.6			0.00021851			99.6	0.00019653	0.00018677				99.6	0.00877686	0.00686035	0.00788574
											-0.00011475								99.7			0.00021729			99.7	0.00019531	0.00018555				99.7	0.00876465	0.00688477	0.00787354
											-0.00011475								99.8			0.00021851			99.8	0.00019531	0.00019043				99.8	0.00875244	0.00689697	0.00788574
											-0.00011597								99.9			0.00021851			99.9	0.00019653	0.00018921				99.9	0.00875244	0.00689697	0.00788574
											-0.00011475								100			0.00021851			100	0.00019531	0.00018921				100	0.00877686	0.00687256	0.00788574
											-0.00011475								100.1			0.00021729			100.1	0.00019531	0.00018799				100.1	0.00877686	0.00689697	0.00788574
											-0.00011475								100.2			0.00021729			100.2	0.00019409	0.00018799				100.2	0.00877686	0.00687256	0.00787354
											-0.00011475								100.3			0.00021851			100.3	0.00019653	0.00018799				100.3	0.00876465	0.00688477	0.00786133
											-0.00011475								100.4			0.00021729			100.4	0.00019531	0.00018799				100.4	0.00878906	0.00689697	0.00787354
											-0.00011597								100.5			0.00021851			100.5	0.00019653	0.00018799				100.5	0.00876465	0.00687256	0.00787354
											-0.00011475								100.6			0.00021729			100.6	0.00019653	0.00018921				100.6	0.00880127	0.00690918	0.00788574
											-0.00011475								100.7			0.00021606			100.7	0.00019531	0.00018921				100.7	0.00877686	0.00690918	0.00786133
											-0.00011475								100.8			0.00021729			100.8	0.00019287	0.00018921				100.8	0.00877686	0.00688477	0.00787354
											-0.00011475								100.9			0.00021851			100.9	0.00019775	0.00018921				100.9	0.00877686	0.00688477	0.00787354
											-0.00011353								101			0.00021606			101	0.00019653	0.00018799				101	0.00880127	0.00689697	0.00784912
											-0.00011597								101.1			0.00021606			101.1	0.00019531	0.00019043				101.1	0.00878906	0.00690918	0.00788574
											-0.00011475								101.2			0.00021729			101.2	0.00019531	0.00018799				101.2	0.00878906	0.00689697	0.00787354
											-0.00011475								101.3			0.00021729			101.3	0.00019531	0.00018799				101.3	0.00881348	0.00689697	0.00787354
											-0.00011475								101.4			0.00021729			101.4	0.00019653	0.00018921				101.4	0.00880127	0.00690918	0.00787354
											-0.00011597								101.5			0.00021606			101.5	0.00019775	0.00018921				101.5	0.00882568	0.00689697	0.00786133
											-0.00011475								101.6			0.00021729			101.6	0.00019409	0.00018921				101.6	0.00880127	0.00690918	0.00786133
											-0.00011475								101.7			0.00021729			101.7	0.00019653	0.00018921				101.7	0.00878906	0.00690918	0.00787354
											-0.00011475								101.8			0.00021851			101.8	0.00019409	0.00018921				101.8	0.00880127	0.00692139	0.00788574
											-0.00011597								101.9			0.00021851			101.9	0.00019653	0.00018799				101.9	0.00880127	0.00689697	0.00787354
											-0.00011597								102			0.00021729			102	0.00019409	0.00018921				102	0.00880127	0.00689697	0.00788574
											-0.00011597								102.1			0.00021729			102.1	0.00019653	0.00018799				102.1	0.00881348	0.00688477	0.00789795
											-0.00011475								102.2			0.00021729			102.2	0.00019531	0.00018921				102.2	0.00876465	0.00690918	0.00786133
											-0.00011597								102.3			0.00021851			102.3	0.00019653	0.00018921				102.3	0.00875244	0.00690918	0.00788574
											-0.00011475								102.4			0.00021729			102.4	0.00019287	0.00019043				102.4	0.00875244	0.00692139	0.00787354
											-0.00011353								102.5			0.00021729			102.5	0.00019653	0.00018799				102.5	0.00878906	0.00693359	0.00788574
											-0.00011475								102.6			0.00021729			102.6	0.00019775	0.00018799				102.6	0.00878906	0.00693359	0.00791016
											-0.00011475								102.7			0.00021606			102.7	0.00019897	0.00018677				102.7	0.00880127	0.00690918	0.00791016
											-0.00011475								102.8			0.00021606			102.8	0.00019409	0.00019043				102.8	0.00878906	0.00692139	0.00788574
											-0.00011597								102.9			0.00021729			102.9	0.00019653	0.00018799				102.9	0.00880127	0.00692139	0.00789795
											-0.00011475								103			0.00021729			103	0.00019531	0.00019043				103	0.00877686	0.00692139	0.00789795
											-0.00011597								103.1			0.00021729			103.1	0.00019531	0.00018799				103.1	0.00882568	0.00693359	0.00788574
											-0.00011597								103.2			0.00021851			103.2	0.00019653	0.00018799				103.2	0.00881348	0.00693359	0.00789795
											-0.00011353								103.3			0.00021729			103.3	0.00019531	0.00018799				103.3	0.00882568	0.00692139	0.00789795
											-0.00011597								103.4			0.00021729			103.4	0.00019653	0.00018799				103.4	0.0088501	0.00690918	0.00788574
											-0.00011597								103.5			0.00021729			103.5	0.00019531	0.00018921				103.5	0.00882568	0.00693359	0.00788574
											-0.00011597								103.6			0.00021851			103.6	0.00019653	0.00018799				103.6	0.00881348	0.0069458	0.00791016
											-0.00011475								103.7			0.00021606			103.7	0.00019409	0.00018921				103.7	0.00883789	0.0069458	0.00789795
											-0.00011475								103.8			0.00021729			103.8	0.00019531	0.00018799				103.8	0.00881348	0.00693359	0.00792236
											-0.00011475								103.9			0.00021729			103.9	0.00019653	0.00018799				103.9	0.00881348	0.00693359	0.00789795
											-0.00011353								104			0.00021851			104	0.00019531	0.00018799				104	0.00882568	0.00690918	0.00791016
											-0.00011475								104.1			0.00021606			104.1	0.00019653	0.00018921				104.1	0.00881348	0.00695801	0.00789795
											-0.00011353								104.2			0.00021729			104.2	0.00019409	0.00018921				104.2	0.00881348	0.00697021	0.00792236
											-0.00011353								104.3			0.00021729			104.3	0.00019409	0.00019043				104.3	0.00880127	0.00695801	0.00791016
											-0.00011353								104.4			0.00021729			104.4	0.00019531	0.00018921				104.4	0.00881348	0.00695801	0.00791016
											-0.00011475								104.5			0.00021606			104.5	0.00019653	0.00019043				104.5	0.00880127	0.0069458	0.00791016
											-0.00011475								104.6			0.00021484			104.6	0.00019653	0.00018799				104.6	0.00880127	0.00695801	0.00791016
											-0.00011475								104.7			0.00021606			104.7	0.00019409	0.00019043				104.7	0.00877686	0.0069458	0.00788574
											-0.00011475								104.8			0.00021606			104.8	0.00019775	0.00018799				104.8	0.00877686	0.00695801	0.00789795
											-0.00011597								104.9			0.00021606			104.9	0.00019409	0.00019043				104.9	0.00880127	0.0069458	0.00789795
											-0.00011597								105			0.00021729			105	0.00019653	0.00018799				105	0.00881348	0.00695801	0.00789795
											-0.00011475								105.1			0.00021729			105.1	0.00019531	0.00018921				105.1	0.00881348	0.0069458	0.00789795
											-0.00011475								105.2			0.00021606			105.2	0.00019653	0.00019043				105.2	0.00878906	0.0069458	0.00787354
											-0.00011597								105.3			0.00021606			105.3	0.00019653	0.00018799				105.3	0.00878906	0.00693359	0.00787354
											-0.00011597								105.4			0.00021606			105.4	0.00019287	0.00018921				105.4	0.00878906	0.00695801	0.00788574
											-0.00011597								105.5			0.00021606			105.5	0.00019653	0.00018799				105.5	0.00877686	0.00697021	0.00787354
											-0.00011475								105.6			0.00021606			105.6	0.00019653	0.00018921				105.6	0.00878906	0.00697021	0.00788574
											-0.00011353								105.7			0.00021606			105.7	0.00019653	0.00019043				105.7	0.00880127	0.00695801	0.00786133
											-0.00011353								105.8			0.00021606			105.8	0.00019775	0.00018921				105.8	0.00880127	0.00697021	0.00784912
											-0.00011353								105.9			0.00021606			105.9	0.00019653	0.00018921				105.9	0.00881348	0.00695801	0.00782471
											-0.00011353								106			0.00021484			106	0.00019531	0.00018921				106	0.00881348	0.00697021	0.00786133
											-0.0001123								106.1			0.00021606			106.1	0.00019653	0.00018799				106.1	0.00878906	0.00698242	0.00787354
											-0.00011475								106.2			0.00021484			106.2	0.00019531	0.00018799				106.2	0.00881348	0.00698242	0.00787354
											-0.00011475								106.3			0.00021484			106.3	0.00019409	0.00018921				106.3	0.00882568	0.00699463	0.00784912
											-0.00011475								106.4			0.00021606			106.4	0.00019531	0.00018921				106.4	0.00881348	0.00699463	0.00786133
											-0.00011475								106.5			0.00021606			106.5	0.00019653	0.00018799				106.5	0.00882568	0.00697021	0.00786133
											-0.00011475								106.6			0.00021606			106.6	0.00019531	0.00018799				106.6	0.00880127	0.00697021	0.00783691
											-0.00011475								106.7			0.00021729			106.7	0.00019531	0.00019043				106.7	0.00877686	0.00700684	0.00786133
											-0.00011353								106.8			0.00021606			106.8	0.00019653	0.00019043				106.8	0.00882568	0.00699463	0.00787354
											-0.00011353								106.9			0.00021729			106.9	0.00019653	0.00018677				106.9	0.00881348	0.00700684	0.00784912
											-0.00011475								107			0.00021606			107	0.00019409	0.00018799				107	0.00881348	0.00700684	0.00786133
											-0.00011475								107.1			0.00021851			107.1	0.00019409	0.00018677				107.1	0.00880127	0.00700684	0.00786133
											-0.00011475								107.2			0.00021606			107.2	0.00019653	0.00018921				107.2	0.00881348	0.00698242	0.00784912
											-0.00011475								107.3			0.00021729			107.3	0.00019409	0.00019043				107.3	0.00878906	0.00700684	0.00788574
											-0.00011475								107.4			0.00021729			107.4	0.00019653	0.00018799				107.4	0.00882568	0.00701904	0.00787354
											-0.00011353								107.5			0.00021606			107.5	0.00019653	0.00018799				107.5	0.00882568	0.00699463	0.00787354
											-0.00011475								107.6			0.00021606			107.6	0.00019653	0.00018921				107.6	0.00878906	0.00699463	0.00787354
											-0.00011475								107.7			0.00021729			107.7	0.00019409	0.00018921				107.7	0.00877686	0.00699463	0.00786133
											-0.00011475								107.8			0.00021606			107.8	0.00019531	0.00018921				107.8	0.00877686	0.00698242	0.00784912
											-0.00011475								107.9			0.00021484			107.9	0.00019775	0.00018799				107.9	0.00876465	0.00698242	0.00786133
											-0.00011475								108			0.00021606			108	0.00019653	0.00019043				108	0.00878906	0.00700684	0.00786133
											-0.00011475								108.1			0.00021606			108.1	0.00019653	0.00019043				108.1	0.00880127	0.00700684	0.00787354
											-0.00011597								108.2			0.00021606			108.2	0.00019409	0.00018799				108.2	0.00878906	0.00699463	0.00786133
											-0.00011597								108.3			0.00021729			108.3	0.00019531	0.00018921				108.3	0.00878906	0.00699463	0.00784912
											-0.00011597								108.4			0.00021729			108.4	0.00019653	0.00018921				108.4	0.00877686	0.00698242	0.00783691
											-0.00011475								108.5			0.00021606			108.5	0.00019531	0.00018921				108.5	0.00877686	0.00698242	0.00786133
											-0.00011475								108.6			0.00021484			108.6	0.00019531	0.00018677				108.6	0.00876465	0.00700684	0.00786133
											-0.00011475								108.7			0.00021606			108.7	0.00019531	0.00018921				108.7	0.00880127	0.00699463	0.00787354
											-0.00011353								108.8			0.00021606			108.8	0.00019531	0.00018921				108.8	0.00878906	0.00699463	0.00787354
											-0.00011475								108.9			0.00021729			108.9	0.00019409	0.00018799				108.9	0.00877686	0.00700684	0.00786133
											-0.00011475								109			0.00021606			109	0.00019653	0.00019165				109	0.00878906	0.00700684	0.00783691
											-0.00011475								109.1			0.00021729			109.1	0.00019653	0.00018921				109.1	0.00876465	0.00698242	0.00784912
											-0.00011353								109.2			0.00021729			109.2	0.00019409	0.00018799				109.2	0.00876465	0.00701904	0.00784912
											-0.00011597								109.3			0.00021606			109.3	0.00019775	0.00019043				109.3	0.00877686	0.00700684	0.00786133
											-0.00011475								109.4			0.00021606			109.4	0.00019653	0.00018921				109.4	0.00878906	0.00701904	0.00787354
											-0.00011475								109.5			0.00021606			109.5	0.00019653	0.00018799				109.5	0.00876465	0.00703125	0.00788574
											-0.00011353								109.6			0.00021729			109.6	0.00019531	0.00019043				109.6	0.00877686	0.00701904	0.00788574
											-0.00011475								109.7			0.00021729			109.7	0.00019409	0.00019043				109.7	0.00877686	0.00700684	0.00783691
											-0.00011475								109.8			0.00021606			109.8	0.00019653	0.00018799				109.8	0.00875244	0.00701904	0.00783691
											-0.00011475								109.9			0.00021484			109.9	0.00019409	0.00018921				109.9	0.00880127	0.00701904	0.00786133
											-0.00011353								110			0.00021729			110	0.00019653	0.00019043				110	0.00878906	0.00700684	0.00786133
											-0.00011475								110.1			0.00021729			110.1	0.00019775	0.00018799				110.1	0.00877686	0.00701904	0.00784912
											-0.00011475								110.2			0.00021851			110.2	0.00019653	0.00018921				110.2	0.00877686	0.00701904	0.00788574
											-0.00011475								110.3			0.00021729			110.3	0.00019775	0.00018799				110.3	0.00877686	0.00700684	0.00784912
											-0.00011353								110.4			0.00021729			110.4	0.00019653	0.00018799				110.4	0.00877686	0.00701904	0.00783691
											-0.00011353								110.5			0.00021729			110.5	0.00019531	0.00018921				110.5	0.00880127	0.00701904	0.00786133
											-0.00011353								110.6			0.00021851			110.6	0.00019653	0.00018799				110.6	0.00877686	0.00700684	0.00786133
											-0.00011475								110.7			0.00021729			110.7	0.00019531	0.00018921				110.7	0.00878906	0.00701904	0.00784912
											-0.00011475								110.8			0.00021729			110.8	0.00019653	0.00018799				110.8	0.00878906	0.00703125	0.00787354
											-0.00011353								110.9			0.00021729			110.9	0.00019653	0.00018921				110.9	0.00878906	0.00704346	0.00784912
											-0.00011475								111			0.00021851			111	0.00019531	0.00018799				111	0.00877686	0.00703125	0.00783691
											-0.00011353								111.1			0.00021729			111.1	0.00019775	0.00018799				111.1		0.00706787	0.00786133
											-0.00011353								111.2			0.00021606			111.2	0.00019775	0.00018921				111.2		0.00705566	0.00788574
											-0.00011353								111.3			0.00021606			111.3	0.00019531	0.00019043				111.3		0.00704346	0.00787354
											-0.00011475								111.4			0.00021729			111.4	0.00019531	0.00018921				111.4		0.00704346	0.00786133
											-0.00011353								111.5			0.00021606			111.5	0.00019531	0.00019043				111.5		0.00704346	0.00786133
											-0.00011353								111.6			0.00021606			111.6	0.00019897	0.00019043				111.6		0.00701904	0.00783691
											-0.00011353								111.7			0.00021606			111.7	0.00019531	0.00018921				111.7		0.00704346	0.00787354
											-0.00011353								111.8			0.00021606			111.8	0.00019653	0.00018799				111.8		0.00705566	0.00786133
											-0.00011353								111.9			0.00021606			111.9	0.00019775	0.00018921				111.9		0.00703125	0.00786133
											-0.00011475								112			0.00021606			112	0.00019531	0.00019043				112		0.00704346	0.00786133
											-0.00011353								112.1			0.00021606			112.1	0.00019897	0.00018921				112.1		0.00706787	0.00789795
											-0.00011353								112.2			0.00021729			112.2	0.00019653	0.00018677				112.2		0.00705566	0.00784912
											-0.00011353								112.3			0.00021729			112.3	0.00019653	0.00019043				112.3		0.00706787	0.00787354
											-0.00011353								112.4			0.00021606			112.4	0.00019775	0.00018921				112.4		0.00706787	0.00787354
											-0.00011597								112.5			0.00021484			112.5	0.00019409	0.00018921				112.5		0.00706787	0.00788574
											-0.00011475								112.6			0.00021729			112.6	0.00019653	0.00018799				112.6		0.00706787	0.00786133
											-0.00011353								112.7			0.00021729			112.7	0.00019531	0.00018799				112.7		0.00708008	0.00786133
											-0.00011353								112.8			0.00021606			112.8	0.00019653	0.00018799				112.8		0.00705566	0.00784912
											-0.00011353								112.9			0.00021606			112.9	0.00019653	0.00018799				112.9		0.00704346	0.00784912
											-0.00011353								113			0.00021606			113	0.00019775	0.00019043				113		0.00706787	0.00786133
											-0.00011475								113.1			0.00021729			113.1	0.00019409	0.00019043				113.1		0.00705566	0.00786133
											-0.00011353								113.2			0.00021606			113.2	0.00019775	0.00018799				113.2		0.00704346	0.00784912
											-0.00011353								113.3			0.00021729			113.3	0.00019653	0.00018921				113.3		0.00704346	0.00783691
											-0.00011353								113.4			0.00021606			113.4	0.00019653	0.00018921				113.4		0.00708008	0.00783691
											-0.00011353								113.5			0.00021606			113.5	0.00019653	0.00019043				113.5		0.00705566	0.00786133
											-0.0001123								113.6			0.00021729			113.6	0.00019653	0.00018921				113.6		0.00705566	0.00786133
											-0.00011353								113.7			0.00021606			113.7	0.00019775	0.00018799				113.7		0.00705566	0.00784912
											-0.00011353								113.8			0.00021606			113.8	0.00019409	0.00018799				113.8		0.00706787	0.00784912
											-0.00011353								113.9			0.00021606			113.9	0.00019653	0.00018921				113.9		0.00705566	0.00782471
											-0.00011353								114			0.00021606			114	0.00019409	0.00019165				114		0.00705566	0.00786133
											-0.00011475								114.1			0.00021606			114.1	0.00019409	0.00018921				114.1		0.00706787	0.00783691
											-0.00011475								114.2			0.00021484			114.2	0.00019531	0.00018921				114.2		0.00704346	0.00784912
											-0.00011353								114.3			0.00021484			114.3	0.00019775	0.00018921				114.3		0.00708008	0.00787354
											-0.00011475								114.4			0.00021606			114.4	0.00019653	0.00018799				114.4		0.00706787	0.00787354
											-0.00011353								114.5			0.00021606			114.5	0.00019531	0.00018799				114.5		0.00708008	0.00787354
											-0.00011475								114.6			0.00021484			114.6	0.00019775	0.00018799				114.6		0.00709229	0.00787354
											-0.00011475								114.7			0.00021484			114.7	0.00019775	0.00019043				114.7		0.00708008	0.00786133
											-0.00011475								114.8			0.00021606			114.8	0.00019531	0.00018921				114.8		0.00705566	0.00788574
											-0.00011597								114.9			0.00021606			114.9	0.00019531	0.00018921				114.9		0.00710449	0.00786133
											-0.00011597								115			0.00021729			115	0.00019775	0.00019043				115		0.00708008	0.00787354
											-0.00011597								115.1			0.00021484			115.1	0.00019531	0.00018799				115.1		0.00708008	0.00787354
											-0.00011597								115.2			0.00021606			115.2	0.00019653	0.00018799				115.2		0.00709229	0.00788574
											-0.00011597								115.3			0.00021606			115.3	0.00019409	0.00019043				115.3		0.00710449	0.00784912
											-0.00011475								115.4			0.00021606			115.4	0.00019653	0.00018677				115.4		0.00709229	0.00784912
											-0.00011597								115.5			0.00021606			115.5	0.00019653	0.00019043				115.5		0.00708008	0.00784912
											-0.00011597								115.6			0.00021484			115.6	0.00019653	0.00018921				115.6		0.00709229	0.00787354
											-0.00011475								115.7			0.00021606			115.7	0.00019653	0.00019043				115.7		0.00708008	0.00787354
											-0.00011353								115.8			0.00021606			115.8	0.00019531	0.00018799				115.8		0.00709229	0.00786133
											-0.00011353								115.9			0.00021606			115.9	0.00019409	0.00019043				115.9		0.00712891	0.00786133
											-0.0001123								116			0.00021606			116	0.00019653	0.00018921				116		0.00709229	0.00784912
											-0.00010376								116.1			0.00021606			116.1	0.00019531	0.00019043				116.1		0.00710449	0.00787354
											-0.00010376								116.2			0.00021729			116.2	0.00019531	0.00018921				116.2		0.00710449	0.00788574
											-0.00010498								116.3			0.00021606			116.3	0.00019409	0.00018921				116.3		0.0071167	0.00788574
											-0.00010742								116.4			0.00021729			116.4	0.00019531	0.00019043				116.4		0.00712891	0.00788574
											-0.0001123								116.5			0.00021484			116.5	0.00019775	0.00018921				116.5		0.00712891	0.00788574
											-0.00011353								116.6			0.00021606			116.6	0.00019775	0.00019043				116.6		0.0071167	0.00786133
											-0.00011353								116.7			0.00021729			116.7	0.00019531	0.00018921				116.7		0.00708008	0.00787354
											-0.00011108								116.8			0.00021729			116.8	0.00019897	0.00018921				116.8		0.00708008	0.00786133
											-0.0001123								116.9			0.00021606			116.9	0.00019775	0.00018921				116.9		0.00709229	0.00787354
											-0.00011353								117			0.00021606			117	0.00019531	0.00018921				117		0.00710449	0.00787354
											-0.00011353								117.1			0.00021729			117.1	0.00019531	0.00018921				117.1		0.00710449	0.00791016
											-0.0001123								117.2			0.00021606			117.2	0.00019531	0.00018921				117.2		0.0071167	0.00788574
											-0.00011353								117.3			0.00021606			117.3	0.00019409	0.00018799				117.3		0.00709229	0.00789795
											-0.0001123								117.4			0.00021606			117.4	0.00019409	0.00018921				117.4		0.00709229	0.00788574
											-0.00011353								117.5			0.00021606			117.5	0.00019653	0.00018921				117.5		0.00710449	0.00788574
											-0.00011353								117.6			0.00021484			117.6	0.00019409	0.00018921				117.6		0.00710449	0.00789795
											-0.00011108								117.7			0.00021484			117.7	0.00019409	0.00019043				117.7		0.00710449	0.00788574
											-0.00011353								117.8			0.00021484			117.8	0.00019653	0.00019043				117.8		0.00710449	0.00787354
											-0.00011475								117.9			0.00021606			117.9	0.00019531	0.00018921				117.9		0.00709229	0.00786133
											-0.00011353								118			0.00021606			118	0.00019409	0.00018921				118		0.00710449	0.00788574
											-0.0001123								118.1			0.00021606			118.1	0.00019531	0.00019165				118.1		0.00710449	0.00788574
											-0.00011353								118.2			0.00021606			118.2	0.00019409	0.00018921				118.2		0.00709229	0.00789795
											-0.00011475								118.3			0.00021729			118.3	0.00019653	0.00018799				118.3		0.00710449	0.00787354
											-0.0001123											0.00021729					0.00018799				118.4		0.0071167	0.00788574
											-0.00011353											0.00021484					0.00018921				118.5		0.00709229	0.00783691
											-0.00011353											0.00021606					0.00018799				118.6		0.00708008	0.00788574
											-0.00011353											0.00021606									118.7		0.00712891	0.00787354
											-0.00011353											0.00021729									118.8		0.0071167	0.00784912
											-0.0001123											0.00021729									118.9		0.0071167	0.00783691
											-0.00011353											0.00021606									119		0.0071167	0.00786133
											-0.00011353											0.00021606									119.1		0.0071167	0.00786133
											-0.00011353											0.00021729									119.2		0.00709229	0.00788574
											-0.00011353											0.00021973									119.3		0.0071167	0.00787354
											-0.00011353											0.00021484									119.4		0.0071167	0.00786133
											-0.0001123											0.00021606									119.5		0.00710449	0.00787354
											-0.0001123											0.00021606									119.6		0.0071167	0.00787354
											-0.00011353											0.00021729									119.7		0.0071167	0.00786133
											-0.00011353											0.00021729									119.8		0.00710449	0.00788574
											-0.0001123											0.00021606									119.9		0.00710449	0.00788574
											-0.0001123											0.00021729									120		0.0071167	0.00788574
											-0.0001123											0.00021729									120.1		0.0071167	0.00787354
											-0.00011353											0.00021729									120.2		0.0071167	0.00788574
											-0.00011475											0.00021606									120.3		0.0071167	0.00787354
											-0.00011353											0.00021606									120.4		0.00709229	0.00784912
											-0.0001123											0.00021729									120.5		0.00708008	0.00787354
											-0.00011353											0.00021606									120.6		0.0071167	0.00786133
											-0.00011475											0.00021606									120.7		0.0071167	0.00787354
											-0.00011475											0.00021484									120.8		0.00710449	0.00786133
											-0.00011475											0.00021606									120.9		0.0071167	0.00784912
											-0.00011475											0.00021606									121		0.0071167	0.00783691
											-0.00011353											0.00021606									121.1		0.00710449	0.00786133
											-0.00011353											0.00021484									121.2		0.0071167	0.00786133
											-0.00011475											0.00021484									121.3		0.0071167	0.00784912
											-0.00011353											0.00021362									121.4		0.00712891	0.00784912
											-0.00011353											0.00021606									121.5		0.00712891	0.00786133
											-0.0001123											0.00021484									121.6		0.00714111	0.00782471
											-0.00011353											0.00021484									121.7		0.00712891	0.00784912
											-0.00011353											0.00021606									121.8		0.00712891	0.00786133
											-0.00011475											0.00021484									121.9		0.00712891	0.00784912
											-0.00011475											0.00021362									122		0.00714111	0.00784912
											-0.00011353											0.00021606									122.1		0.00714111	0.00788574
											-0.00011353											0.00021606									122.2		0.00714111	0.00787354
											-0.00011475											0.00021606									122.3		0.00714111	0.00786133
											-0.00011475											0.00021484									122.4		0.00712891	0.00788574
											-0.00011353											0.00021484									122.5		0.00715332	0.00788574
											-0.00011475											0.00021484									122.6		0.00715332	0.00792236
											-0.00011475											0.00021729									122.7		0.00715332	0.00788574
											-0.00011475											0.00021729									122.8		0.00715332	0.00787354
											-0.00011353											0.00021606									122.9		0.00716553	0.00782471
											-0.00011475											0.00021606									123		0.00714111	0.00784912
											-0.00011353											0.00021606									123.1		0.00716553	0.00787354
											-0.00011353											0.00021606									123.2		0.00714111	0.00786133
											-0.00011353																				123.3		0.00714111	0.00787354
											-0.0001123																				123.4		0.00715332	0.00789795
											-0.0001123																				123.5		0.00715332	0.00786133
											-0.00011353																				123.6		0.00712891	0.00788574
											-0.00011353																				123.7		0.00715332	0.00788574
											-0.00011353																				123.8		0.00717773	0.00791016
											-0.00011353																				123.9		0.00714111	0.00788574
											-0.0001123																				124		0.00714111	0.00788574
											-0.0001123																				124.1		0.00715332
											-0.0001123																				124.2		0.00714111
											-0.0001123																				124.3		0.00712891
											-0.0001123																				124.4		0.00714111
											-0.0001123																				124.5		0.00714111
											-0.0001123																				124.6		0.00715332
											-0.00011353																				124.7		0.00715332
											-0.00011353																				124.8		0.00715332
											-0.0001123																				124.9		0.00715332
											-0.0001123																				125		0.00715332
											-0.0001123																				125.1		0.00715332
											-0.0001123																				125.2		0.00715332
											-0.0001123																				125.3		0.00715332
											-0.0001123																				125.4		0.00715332
											-0.00011353																				125.5		0.00714111
											-0.0001123																				125.6		0.00715332
											-0.00011353																				125.7		0.00715332
											-0.0001123																				125.8		0.00715332
											-0.0001123																				125.9		0.00714111
											-0.0001123																				126		0.00716553
											-0.00011353																				126.1		0.00715332
											-0.00011475																				126.2		0.00712891
											-0.0001123																				126.3		0.00716553
											-0.0001123																				126.4		0.00716553
											-0.0001123																				126.5		0.00714111
											-0.0001123																				126.6		0.00714111
											-0.0001123																				126.7		0.00714111
											-0.00011108																				126.8		0.00712891
											-0.0001123																				126.9		0.00714111
											-0.00011353																				127		0.00714111
											-0.00011353																				127.1		0.00714111
											-0.0001123																				127.2		0.00716553
											-0.0001123																				127.3		0.00716553
											-0.0001123																				127.4		0.00715332
											-0.0001123																				127.5		0.00712891
											-0.0001123																				127.6		0.00714111
											-0.0001123																				127.7		0.00716553
											-0.00011108																				127.8		0.00715332
											-0.0001123																				127.9		0.00715332
											-0.00011353																				128		0.00727539
											-0.0001123																				128.1		0.00734863
											-0.0001123																				128.2		0.00742188
											-0.0001123																				128.3		0.00744629
											-0.00011108																				128.4		0.00744629
											-0.0001123																				128.5		0.0074585
											-0.0001123																				128.6		0.0074585
											-0.0001123																				128.7		0.00740967
											-0.0001123																				128.8		0.00736084
											-0.00011108																				128.9		0.00732422
											-0.00011353																				129		0.0072998
											-0.00011108																				129.1		0.00732422
											-0.00011108																				129.2		0.0072998
											-0.00010986																				129.3		0.0072876
											-0.00011108																				129.4		0.00727539
											-0.0001123																				129.5		0.0072998
											-0.0001123																				129.6		0.0072876
											-0.0001123																				129.7		0.0072998
											-0.0001123																				129.8		0.0072876
											-0.00011353																				129.9		0.0072876
											-0.0001123																				130		0.00726318
											-0.00011108																				130.1		0.0072998
											-0.00010986																				130.2		0.00731201
											-0.00010986																				130.3		0.0072998
											-0.0001123																				130.4		0.0072998
											-0.00011108																				130.5		0.00732422
											-0.0001123																				130.6		0.0072998
											-0.00011108																				130.7		0.00733643
											-0.00011108																				130.8		0.00733643
											-0.00011108																				130.9		0.00733643
											-0.00011108																				131		0.00733643
											-0.00011108																				131.1		0.00733643
											-0.00010986																				131.2		0.00733643
											-0.00011108																				131.3		0.00736084
											-0.0001123																				131.4		0.00736084
											-0.00011108																				131.5		0.00734863
											-0.00011108																				131.6		0.00736084
											-0.00011108																				131.7		0.00738525
											-0.00011108																				131.8		0.00736084
											-0.00011108																				131.9		0.00734863
											-0.00010986																				132		0.00738525
											-0.00010986																				132.1		0.00737305
											-0.0001123																				132.2		0.00737305
											-0.0001123																				132.3		0.00739746
											-0.0001123																				132.4		0.00738525
											-0.00011108																				132.5		0.00736084
											-0.00011108																				132.6		0.00739746
											-0.00011108																				132.7		0.00737305
											-0.00011108																				132.8		0.00739746
											-0.0001123																				132.9		0.00738525
											-0.00011108																				133		0.00742188
											-0.00011108																				133.1		0.00739746
											-0.00010986																				133.2		0.00739746
											-0.0001123																				133.3		0.00740967
											-0.0001123																				133.4		0.00740967
											-0.00011108																				133.5		0.00740967
											-0.00011108																				133.6		0.00742188
											-0.00011108																				133.7		0.00740967
											-0.00011108																				133.8		0.00739746
											-0.00011108																				133.9		0.00742188
											-0.00011108																				134		0.00742188
											-0.00011108																				134.1		0.00742188
											-0.00011108																				134.2		0.00743408
											-0.00011108																				134.3		0.00742188
											-0.00011108																				134.4		0.00740967
											-0.00010986																				134.5		0.0074585
											-0.00011108																				134.6		0.00744629
											-0.0001123																				134.7		0.00744629
											-0.00011108																				134.8		0.00743408
											-0.00011108																				134.9		0.00744629
											-0.0001123																				135		0.00740967
											-0.00011108																				135.1		0.00744629
											-0.00010986																				135.2		0.00744629
											-0.00011108																				135.3		0.0074707
											-0.00010986																				135.4		0.00748291
											-0.00011108																				135.5		0.00748291
											-0.00011108																				135.6		0.0074707
											-0.00011108																				135.7		0.00748291
											-0.00011108																				135.8		0.00751953
											-0.0001123																				135.9		0.00751953
											-0.00010986																				136		0.00753174
											-0.00010986																				136.1		0.00753174
											-0.00011108																				136.2		0.00751953
											-0.00010986																				136.3		0.00751953
											-0.00010986																				136.4		0.00753174
											-0.00011108																				136.5		0.00751953
											-0.00011108																				136.6		0.00753174
											-0.00011108																				136.7		0.00753174
											-0.00011108																				136.8		0.00754395
											-0.00010986																				136.9		0.00754395
											-0.00011108																				137		0.00754395
											-0.00011108																				137.1		0.00754395
											-0.00011108																				137.2		0.00754395
											-0.00011108																				137.3		0.00755615
											-0.00011108																				137.4		0.00755615
											-0.00011108																				137.5		0.00751953
											-0.00011108																				137.6		0.00751953
											-0.00011108																				137.7		0.00755615
											-0.00011108																				137.8		0.00755615
											-0.00010986																				137.9		0.00754395
											-0.00010986																				138		0.00754395
											-0.00010986																				138.1		0.00755615
											-0.00010986																				138.2		0.00754395
											-0.00010986																				138.3		0.00756836
											-0.00010986																				138.4		0.00758057
											-0.00011108																				138.5		0.00756836
											-0.00011108																				138.6		0.00758057
											-0.00010986																				138.7		0.00758057
											-0.00010986																				138.8		0.00756836
											-0.00011108																				138.9		0.00755615
											-0.00011108																				139		0.00758057
											-0.0001123																				139.1		0.00759277
											-0.00010986																				139.2		0.00758057
											-0.00010864																				139.3		0.00758057
											-0.00010986																				139.4		0.00759277
											-0.00010864																				139.5		0.00756836
											-0.00010864																				139.6		0.00760498
											-0.00010986																				139.7		0.00761719
											-0.00010986																				139.8		0.00760498
											-0.00010864																				139.9		0.00760498
											-0.00010986																				140		0.00760498
											-0.00010986																				140.1		0.00758057
											-0.00010864																				140.2		0.00760498
											-0.00010986																				140.3		0.00760498
											-0.00010864																				140.4		0.00759277
											-0.00010986																				140.5		0.00760498
											-0.00011108																				140.6		0.00759277
											-0.00010986																				140.7		0.00758057
											-0.00010864																				140.8		0.00760498
											-0.00011108																				140.9		0.00760498
											-0.00010986																				141		0.00760498
											-0.00010986																				141.1		0.00761719
											-0.00010986																				141.2		0.00762939
											-0.00010986																				141.3		0.00762939
											-0.00010986																				141.4		0.00758057
											-0.00010864																				141.5		0.00761719
											-0.00010986																				141.6		0.0076416
											-0.00010986																				141.7		0.00760498
											-0.00010986																				141.8		0.00762939
											-0.00010986																				141.9		0.00762939
											-0.00010986																				142		0.00760498
											-0.00010986																				142.1		0.00765381
											-0.00010986																				142.2		0.00762939
											-0.00010986																				142.3		0.00766602
											-0.00010986																				142.4		0.00765381
											-0.00010986																				142.5		0.00765381
											-0.00010986																				142.6		0.00762939
											-0.00010986																				142.7		0.00762939
											-0.00010986																				142.8		0.00761719
											-0.00010986																				142.9		0.00762939
											-0.00010864																				143		0.00765381
											-0.00010986																				143.1		0.00766602
											-0.00010864																				143.2		0.00766602
											-0.00010864																				143.3		0.00762939
											-0.00010986																				143.4		0.00765381
											-0.00010986																				143.5		0.00765381
											-0.00010986																				143.6		0.00765381
											-0.00010986																				143.7		0.00766602
											-0.00010986																				143.8		0.00767822
											-0.00010986																				143.9		0.00765381
											-0.00010864																				144		0.00765381
											-0.00010864																				144.1		0.00767822
											-0.00010986																				144.2		0.00765381
											-0.00010986																				144.3		0.00767822
											-0.00010986																				144.4		0.00767822
											-0.00010986																				144.5		0.00766602
											-0.00010986																				144.6		0.00769043
											-0.00010864																				144.7		0.00770264
											-0.00010864																				144.8		0.00770264
											-0.00010986																				144.9		0.00769043
											-0.00010864																				145		0.00766602
											-0.00010986																				145.1		0.00767822
											-0.00010864																				145.2		0.0076416
											-0.00010864																				145.3		0.00767822
											-0.00010986																				145.4		0.00767822
											-0.00010986																				145.5		0.00767822
											-0.00010986																				145.6		0.00770264
											-0.00010864																				145.7		0.00770264
											-0.00010864																				145.8		0.00769043
											-0.00010864																				145.9		0.00772705
											-0.00010864																				146		0.00772705
											-0.00010986																				146.1		0.00772705
											-0.00010864																				146.2		0.00775146
											-0.00010986																				146.3		0.00773926
											-0.00010986																				146.4		0.00772705
											-0.00010864																				146.5		0.00772705
											-0.00010864																				146.6		0.00775146
											-0.00010986																				146.7		0.00775146
											-0.00010864																				146.8		0.00775146
											-0.00010864																				146.9		0.00773926
											-0.00010864																				147		0.00775146
											-0.00010864																				147.1		0.00770264
											-0.00010986																				147.2		0.00775146
											-0.00010864																				147.3		0.00771484
											-0.00010742																				147.4		0.00770264
											-0.0001062																				147.5		0.00771484
											-0.00010742																				147.6		0.00772705
											-0.00010742																				147.7		0.00770264
											-0.00010864																				147.8		0.00772705
											-0.0001062																				147.9		0.00771484
											-0.00010742																				148		0.00772705
											-0.00010742																				148.1		0.00775146
											-0.0001062																				148.2		0.00775146
											-0.0001062																				148.3		0.00773926
											-0.0001062																				148.4		0.00776367
											-0.0001062																				148.5		0.00777588
											-0.00010742																				148.6		0.00777588
											-0.0001062																				148.7		0.00778809
											-0.0001062																				148.8		0.00776367
											-0.00010742																				148.9		0.00778809
											-0.0001062																				149		0.00780029
											-0.0001062																				149.1		0.00773926
											-0.0001062																				149.2		0.00776367
											-0.00010498																				149.3		0.00775146
											-0.00010498																				149.4		0.00775146
											-0.00010498																				149.5		0.00777588
											-0.00010498																				149.6		0.00773926
											-0.00010498																				149.7		0.00773926
											-0.00010376																				149.8		0.00776367
											-0.00010376																				149.9		0.00777588
											-0.00010376																				150		0.00775146
											-0.00010254																				150.1		0.00775146
											-0.00010254																				150.2		0.00777588
											-0.00010254																				150.3		0.00778809
											-0.0001001																				150.4		0.00776367
											-0.0001001																				150.5		0.00776367
											-0.0001001																				150.6		0.00773926
											-9.7656e-05																				150.7		0.00775146
											-9.6436e-05																				150.8		0.00773926
											-9.6436e-05																				150.9		0.00773926
											-9.6436e-05																				151		0.00777588
											-9.5215e-05																				151.1		0.00780029
											-9.2773e-05																				151.2		0.00777588
											-9.1553e-05																				151.3		0.00778809
											-9.1553e-05																				151.4		0.0078125
											-9.0332e-05																				151.5		0.00778809
											-8.9111e-05																				151.6		0.00778809
											-8.7891e-05																				151.7		0.00775146
											-8.7891e-05																				151.8		0.00777588
											-8.667e-05																				151.9		0.00777588
											-8.667e-05																				152		0.00777588
											-8.5449e-05																				152.1		0.00777588
											-8.5449e-05																				152.2		0.00778809
											-8.5449e-05																				152.3		0.0078125
											-8.4229e-05																				152.4		0.00780029
											-8.4229e-05																				152.5		0.00778809
											-8.5449e-05																				152.6		0.00776367
											-8.3008e-05																				152.7		0.00776367
											-8.3008e-05																				152.8		0.00776367
											-8.3008e-05																				152.9		0.00777588
											-8.1787e-05																				153		0.00780029
											-7.9346e-05																				153.1		0.0078125
											-7.9346e-05																				153.2		0.0078125
											-7.9346e-05																				153.3		0.00780029
											-7.8125e-05																				153.4		0.00776367
											-7.6904e-05																				153.5		0.00782471
											-7.6904e-05																				153.6		0.0078125
											-7.6904e-05																				153.7		0.00782471
											-7.6904e-05																				153.8		0.00780029
											-7.5684e-05																				153.9		0.00780029
											-7.5684e-05																				154		0.00778809
											-7.5684e-05																				154.1		0.00777588
											-7.4463e-05																				154.2		0.0078125
											-7.4463e-05																				154.3		0.00780029
											-7.4463e-05																				154.4		0.0078125
											-7.3242e-05																				154.5		0.00780029
											-7.3242e-05																				154.6		0.0078125
											-7.4463e-05																				154.7		0.00777588
											-7.2021e-05																				154.8		0.00780029
											-6.958e-05																				154.9		0.00777588
											-7.0801e-05																				155		0.00776367
											-7.0801e-05																				155.1		0.0078125
											-6.8359e-05																				155.2		0.00780029
											-6.8359e-05																				155.3		0.00778809
											-6.8359e-05																				155.4		0.00782471
											-6.5918e-05																				155.5		0.0078125
											-6.7139e-05																				155.6		0.0078125
											-6.5918e-05																				155.7		0.00783691
											-6.5918e-05																				155.8		0.00784912
											-6.5918e-05																				155.9		0.00780029
											-6.4697e-05																				156		0.0078125
											-6.4697e-05																				156.1		0.00778809
											-6.3477e-05																				156.2		0.00777588
											-6.2256e-05																				156.3		0.00778809
											-6.2256e-05																				156.4		0.00780029
											-6.2256e-05																				156.5		0.0078125
											-6.2256e-05																				156.6		0.00777588
											-6.1035e-05																				156.7		0.00780029
											-6.2256e-05																				156.8		0.00782471
											-5.9814e-05																				156.9		0.0078125
											-5.8594e-05																				157		0.00782471
											-5.8594e-05																				157.1		0.00783691
											-5.8594e-05																				157.2		0.00782471
											-5.6152e-05																				157.3		0.00783691
											-5.6152e-05																				157.4		0.00782471
											-5.6152e-05																				157.5		0.00783691
											-5.4932e-05																				157.6		0.00783691
											-5.6152e-05																				157.7		0.00782471
											-5.4932e-05																				157.8		0.00778809
											-5.249e-05																				157.9		0.00780029
											-5.3711e-05																				158		0.00783691
											-5.3711e-05																				158.1		0.00782471
											-5.249e-05																				158.2		0.00782471
											-5.249e-05																				158.3		0.00782471
											-5.127e-05																				158.4		0.00783691
											-5.0049e-05																				158.5		0.00782471
											-5.0049e-05																				158.6		0.00783691
											-5.0049e-05																				158.7		0.00783691
											-5.0049e-05																				158.8		0.00784912
											-4.8828e-05																				158.9		0.00783691
											-4.7607e-05																				159		0.00783691
											-4.7607e-05																				159.1		0.00782471
											-4.7607e-05																				159.2		0.00784912
											-4.7607e-05																				159.3		0.00784912
											-4.7607e-05																				159.4		0.00783691
											-4.7607e-05																				159.5		0.00783691
											-4.6387e-05																				159.6		0.00784912
											-4.5166e-05																				159.7		0.00783691
											-4.3945e-05																				159.8		0.00784912
											-4.2725e-05																				159.9		0.00786133
											-4.1504e-05																				160		0.00786133
											-4.1504e-05																				160.1		0.00786133
											-4.0283e-05																				160.2		0.00784912
											-4.0283e-05																				160.3		0.00784912
											-3.9063e-05																				160.4		0.00786133
											-3.9063e-05																				160.5		0.00786133
											-3.9063e-05																				160.6		0.00784912
											-3.7842e-05																				160.7		0.00786133
											-3.54e-05																				160.8		0.00786133
											-3.6621e-05																				160.9		0.00787354
											-3.54e-05																				161		0.00783691
											-3.6621e-05																				161.1		0.00788574
											-3.418e-05																				161.2		0.00787354
											-3.418e-05																				161.3		0.00789795
											-3.2959e-05																				161.4		0.00787354
											-3.2959e-05																				161.5		0.00788574
											-3.1738e-05																				161.6		0.00784912
											-3.1738e-05																				161.7		0.00787354
											-3.0518e-05																				161.8		0.00788574
											-3.0518e-05																				161.9		0.00787354
											-2.9297e-05																				162		0.00786133
											-2.9297e-05																				162.1		0.00788574
											-2.8076e-05																				162.2		0.00788574
											-2.8076e-05																				162.3		0.00788574
											-2.8076e-05																				162.4		0.00787354
											-2.9297e-05																				162.5		0.00788574
											-2.6855e-05																				162.6		0.00786133
											-2.6855e-05																				162.7		0.00787354
											-2.8076e-05																				162.8		0.00789795
											-2.6855e-05																				162.9		0.00787354
											-2.6855e-05																				163		0.00788574
											-2.6855e-05																				163.1		0.00787354
											-2.6855e-05																				163.2		0.00787354
											-2.8076e-05																				163.3		0.00787354
											-2.6855e-05																				163.4		0.00789795
											-2.6855e-05																				163.5		0.00787354
											-2.5635e-05																				163.6		0.00788574
											-2.5635e-05																				163.7		0.00789795
											-2.5635e-05																				163.8		0.00789795
											-2.5635e-05																				163.9		0.00788574
											-2.4414e-05																				164		0.00787354
											-2.3193e-05																				164.1		0.00787354
											-2.3193e-05																				164.2		0.00788574
											-2.3193e-05																				164.3		0.00789795
											-2.4414e-05																				164.4		0.00787354
											-2.3193e-05																				164.5		0.00789795
											-2.1973e-05																				164.6		0.00788574
											-2.1973e-05																				164.7		0.00789795
											-2.3193e-05																				164.8		0.00787354
											-2.1973e-05																				164.9		0.00788574
											-2.0752e-05																				165		0.00791016
											-2.1973e-05																				165.1		0.00791016
											-2.1973e-05																				165.2		0.00788574
											-2.1973e-05																				165.3		0.00788574
											-2.1973e-05																				165.4		0.00787354
											-2.0752e-05																				165.5		0.00789795
											-2.0752e-05																				165.6		0.00789795
											-2.0752e-05																				165.7		0.00789795
											-2.0752e-05																				165.8		0.00791016
											-1.9531e-05																				165.9		0.00789795
											-1.9531e-05																				166		0.00784912
											-1.8311e-05																				166.1		0.00786133
											-1.8311e-05																				166.2		0.00789795
											-1.8311e-05																				166.3		0.00789795
											-1.9531e-05																				166.4		0.00788574
											-1.709e-05																				166.5		0.00789795
											-1.9531e-05																				166.6		0.00791016
											-1.9531e-05																				166.7		0.00789795
											-1.8311e-05																				166.8		0.00793457
											-1.709e-05																				166.9		0.00791016
											-1.709e-05																				167		0.00791016
											-1.8311e-05																				167.1		0.00789795
											-1.709e-05																				167.2		0.00789795
											-1.5869e-05																				167.3		0.00787354
											-1.5869e-05																				167.4		0.00791016
											-1.709e-05																				167.5		0.00791016
											-1.5869e-05																				167.6		0.00791016
											-1.709e-05																				167.7		0.00791016
											-1.5869e-05																				167.8		0.00791016
											-1.4648e-05																				167.9		0.00789795
											-1.3428e-05																				168		0.00788574
											-1.3428e-05																				168.1		0.00791016
											-1.4648e-05																				168.2		0.00791016
											-1.3428e-05																				168.3		0.00791016
											-1.2207e-05																				168.4		0.00791016
											-1.3428e-05																				168.5		0.00789795
											-1.2207e-05																				168.6		0.00787354
											-1.0986e-05																				168.7		0.00789795
											-1.2207e-05																				168.8		0.00792236
											-1.3428e-05																				168.9		0.00791016
											-1.2207e-05																				169		0.00791016
											-1.2207e-05																				169.1		0.00789795
											-1.2207e-05																				169.2		0.00788574
											-9.7656e-06																				169.3		0.00791016
											-1.2207e-05																				169.4		0.00791016
											-1.2207e-05																				169.5		0.00791016
											-1.0986e-05																				169.6		0.00791016
											-1.0986e-05																				169.7		0.00791016
											-1.0986e-05																				169.8		0.00791016
											-1.2207e-05																				169.9		0.00791016
											-1.2207e-05																				170		0.00793457
											-1.0986e-05																				170.1		0.00789795
											-9.7656e-06																				170.2		0.00787354
											-9.7656e-06																				170.3		0.00791016
											-9.7656e-06																				170.4		0.00791016
											-1.0986e-05																				170.5		0.00789795
											-1.0986e-05																				170.6		0.00792236
											-9.7656e-06																				170.7		0.00792236
											-1.0986e-05																				170.8		0.00793457
											-9.7656e-06																				170.9		0.00793457
											-8.5449e-06																				171		0.00792236
											-8.5449e-06																				171.1		0.00791016
											-8.5449e-06																				171.2		0.00792236
											-8.5449e-06																				171.3		0.00793457
											-8.5449e-06																				171.4		0.00792236
											-9.7656e-06																				171.5		0.00793457
											-8.5449e-06																				171.6		0.00793457
											-9.7656e-06																				171.7		0.00793457
											-8.5449e-06																				171.8		0.00791016
											-8.5449e-06																				171.9		0.00794678
											-8.5449e-06																				172		0.00794678
											-8.5449e-06																				172.1		0.00795898
											-7.3242e-06																				172.2		0.00794678
											-8.5449e-06																				172.3		0.00793457
											-8.5449e-06																				172.4		0.00788574
											-9.7656e-06																				172.5		0.00793457
											-8.5449e-06																				172.6		0.00792236
											-8.5449e-06																				172.7		0.00793457
											-8.5449e-06																				172.8		0.00793457
											-8.5449e-06																				172.9		0.00792236
											-8.5449e-06																				173		0.00791016
											-7.3242e-06																				173.1		0.00794678
											-7.3242e-06																				173.2		0.00793457
											-7.3242e-06																				173.3		0.00793457
											-8.5449e-06																				173.4		0.00793457
											-7.3242e-06																				173.5		0.00792236
											-7.3242e-06																				173.6		0.00791016
											-8.5449e-06																				173.7		0.00788574
											-7.3242e-06																				173.8		0.00791016
											-8.5449e-06																				173.9		0.00792236
											-8.5449e-06																				174		0.00792236
											-7.3242e-06																				174.1		0.00793457
											-7.3242e-06																				174.2		0.00792236
											-7.3242e-06																				174.3		0.00792236
											-7.3242e-06																				174.4		0.00793457
											-6.1035e-06																				174.5		0.00795898
											-6.1035e-06																				174.6		0.00794678
											-6.1035e-06																				174.7		0.00792236
											-7.3242e-06																				174.8		0.00792236
											-7.3242e-06																				174.9		0.00788574
											-7.3242e-06																				175		0.00793457
											-7.3242e-06																				175.1		0.00792236
											-6.1035e-06																				175.2		0.00792236
											-6.1035e-06																				175.3		0.00791016
											-6.1035e-06																				175.4		0.00793457
											-4.8828e-06																				175.5		0.00792236
											-4.8828e-06																				175.6		0.00793457
											-6.1035e-06																				175.7		0.00795898
											-4.8828e-06																				175.8		0.00794678
											-4.8828e-06																				175.9		0.00794678
											-6.1035e-06																				176		0.00792236
											-4.8828e-06																				176.1		0.00792236
											-4.8828e-06																				176.2		0.00792236
											-4.8828e-06																				176.3		0.00793457
											-4.8828e-06																				176.4		0.00793457
											-4.8828e-06																				176.5		0.00794678
											-4.8828e-06																				176.6		0.00793457
											-4.8828e-06																				176.7		0.00794678
											-6.1035e-06																				176.8		0.00792236
											-7.3242e-06																				176.9		0.00793457
											-7.3242e-06																				177		0.00792236
											-6.1035e-06																				177.1		0.00791016
											-7.3242e-06																				177.2		0.00794678
											-8.5449e-06																				177.3		0.00794678
											-8.5449e-06																				177.4		0.00792236
											-8.5449e-06																				177.5		0.00793457
											-8.5449e-06																				177.6		0.00792236
											-8.5449e-06																				177.7		0.00793457
											-9.7656e-06																				177.8		0.00792236
											-8.5449e-06																				177.9		0.00793457
											-7.3242e-06																				178		0.00793457
											-7.3242e-06																				178.1		0.00793457
											-8.5449e-06																				178.2		0.00793457
											-9.7656e-06																				178.3		0.00795898
											-9.7656e-06																				178.4		0.00794678
											-8.5449e-06																				178.5		0.00793457
											-8.5449e-06																				178.6		0.00793457
											-8.5449e-06																				178.7		0.00789795
											-8.5449e-06																				178.8		0.00792236
											-9.7656e-06																				178.9		0.00793457
											-8.5449e-06																				179		0.00792236
											-8.5449e-06																				179.1		0.00793457
											-9.7656e-06																				179.2		0.00795898
											-8.5449e-06																				179.3		0.00793457
											-8.5449e-06																				179.4		0.00792236
											-1.0986e-05																				179.5		0.00792236
											-1.0986e-05																				179.6		0.00793457
											-1.0986e-05																				179.7		0.00793457
											-9.7656e-06																				179.8		0.00794678
											-9.7656e-06																				179.9		0.00795898
											-9.7656e-06																				180		0.00795898
											-9.7656e-06																				180.1		0.00794678
											-9.7656e-06																				180.2		0.00794678
											-1.0986e-05																				180.3		0.00795898
											-9.7656e-06																				180.4		0.00794678
											-9.7656e-06																				180.5		0.00795898
											-9.7656e-06																				180.6		0.00793457
											-9.7656e-06																				180.7		0.00794678
											-9.7656e-06																				180.8		0.00797119
											-9.7656e-06																				180.9		0.00797119
											-1.0986e-05																				181		0.00795898
											-1.0986e-05																				181.1		0.00795898
											-1.0986e-05																				181.2		0.00792236
											-9.7656e-06																				181.3		0.00792236
											-8.5449e-06																				181.4		0.00794678
											-9.7656e-06																				181.5		0.00794678
											-9.7656e-06																				181.6		0.00794678
											-1.0986e-05																				181.7		0.00795898
											-1.0986e-05																				181.8		0.00794678
											-9.7656e-06																				181.9		0.00792236
											-9.7656e-06																				182		0.00794678
											-1.2207e-05																				182.1		0.00795898
											-1.0986e-05																				182.2		0.00794678
											-9.7656e-06																				182.3		0.00795898
											-8.5449e-06																				182.4		0.00797119
											-9.7656e-06																				182.5		0.00794678
											-9.7656e-06																				182.6		0.0079834
											-1.0986e-05																				182.7		0.00794678
											-8.5449e-06																				182.8		0.00797119
											-8.5449e-06																				182.9		0.00795898
											-9.7656e-06																				183		0.00794678
											-9.7656e-06																				183.1		0.00794678
											-9.7656e-06																				183.2		0.00794678
											-1.0986e-05																				183.3		0.00797119
											-9.7656e-06																				183.4		0.00797119
											-9.7656e-06																				183.5		0.00795898
											-1.0986e-05																				183.6		0.00794678
											-1.0986e-05																				183.7		0.00794678
											-9.7656e-06																				183.8		0.00794678
											-9.7656e-06																				183.9		0.00793457
											-1.0986e-05																				184		0.00794678
											-9.7656e-06																				184.1		0.00797119
											-8.5449e-06																				184.2		0.00797119
											-8.5449e-06																				184.3		0.00797119
											-1.0986e-05																				184.4		0.00793457
											-1.0986e-05																				184.5		0.00797119
											-1.0986e-05																				184.6		0.00797119
											-9.7656e-06																				184.7		0.00795898
											-9.7656e-06																				184.8		0.00797119
											-9.7656e-06																				184.9		0.00794678
											-1.2207e-05																				185		0.00795898
											-1.0986e-05																				185.1		0.00794678
											-9.7656e-06																				185.2		0.00795898
											-1.0986e-05																				185.3		0.00794678
											-9.7656e-06																				185.4		0.00794678
											-9.7656e-06																				185.5		0.00794678
											-9.7656e-06																				185.6		0.00794678
											-9.7656e-06																				185.7		0.00792236
											-9.7656e-06																				185.8		0.00795898
											-9.7656e-06																				185.9		0.00797119
											-9.7656e-06																				186		0.00797119
											-1.0986e-05																				186.1		0.00795898
											-1.0986e-05																				186.2		0.00795898
											-1.0986e-05																				186.3		0.00793457
											-9.7656e-06																				186.4		0.0079834
											-9.7656e-06																				186.5		0.0079834
											-9.7656e-06																				186.6		0.00797119
											-1.0986e-05																				186.7		0.0079834
											-1.2207e-05																				186.8		0.0079834
											-9.7656e-06																				186.9		0.00795898
											-1.0986e-05																				187		0.00797119
											-1.0986e-05																				187.1		0.00797119
											-9.7656e-06																				187.2		0.00800781
											-1.0986e-05																				187.3		0.00800781
											-1.0986e-05																				187.4		0.00799561
											-1.2207e-05																				187.5		0.0079834
											-9.7656e-06																				187.6		0.00797119
											-9.7656e-06																				187.7		0.00799561
											-1.0986e-05																				187.8		0.0079834
											-1.0986e-05																				187.9		0.00797119
											-1.2207e-05																				188		0.00797119
											-1.0986e-05																				188.1		0.00795898
											-1.2207e-05																				188.2		0.00794678
											-1.0986e-05																				188.3		0.00797119
											-1.0986e-05																				188.4		0.0079834
											-1.0986e-05																				188.5		0.0079834
											-9.7656e-06																				188.6		0.00797119
											-1.0986e-05																				188.7		0.00797119
											-1.0986e-05																				188.8		0.00794678
											-1.0986e-05																				188.9		0.00794678
											-1.0986e-05																				189		0.00794678
											-9.7656e-06																				189.1		0.00797119
											-1.0986e-05																				189.2		0.00795898
											-1.2207e-05																				189.3		0.00795898
											-1.2207e-05																				189.4		0.00794678
											-1.0986e-05																				189.5		0.00795898
											-9.7656e-06																				189.6		0.00797119
											-1.0986e-05																				189.7		0.00797119
											-1.0986e-05																				189.8		0.0079834
											-1.0986e-05																				189.9		0.00799561
											-1.0986e-05																				190		0.0079834
											-9.7656e-06																				190.1		0.00795898
											-1.0986e-05																				190.2		0.00800781
											-1.0986e-05																				190.3		0.00800781
											-1.0986e-05																				190.4		0.00800781
											-9.7656e-06																				190.5		0.00800781
											-1.0986e-05																				190.6		0.00800781
											-1.0986e-05																				190.7		0.00799561
											-1.0986e-05																				190.8		0.00799561
											-1.0986e-05																				190.9		0.00799561
											-1.0986e-05																				191		0.00800781
											-1.0986e-05																				191.1		0.00800781
											-1.0986e-05																				191.2		0.00800781
											-1.0986e-05																				191.3		0.00802002
											-1.0986e-05																				191.4		0.0079834
											-1.0986e-05																				191.5		0.00800781
											-1.0986e-05																				191.6		0.00800781
											-1.0986e-05																				191.7		0.0079834
											-9.7656e-06																				191.8		0.00800781
											-1.0986e-05																				191.9		0.00799561
											-1.0986e-05																				192		0.00799561
											-1.0986e-05																				192.1		0.00800781
											-1.0986e-05																				192.2		0.00802002
											-1.0986e-05																				192.3		0.00800781
											-1.2207e-05																				192.4		0.00802002
											-1.0986e-05																				192.5		0.00800781
											-1.2207e-05																				192.6		0.00800781
											-1.2207e-05																				192.7		0.00800781
											-1.2207e-05																				192.8		0.00800781
											-1.0986e-05																				192.9		0.00799561
											-1.0986e-05																				193		0.00799561
											-1.0986e-05																				193.1		0.00800781
											-1.0986e-05																				193.2		0.00799561
											-9.7656e-06																				193.3		0.0079834
											-1.0986e-05																				193.4		0.00800781
											-1.0986e-05																				193.5		0.00799561
											-1.0986e-05																				193.6		0.0079834
											-1.0986e-05																				193.7		0.0079834
											-1.0986e-05																				193.8		0.0079834
											-1.2207e-05																				193.9		0.00795898
											-1.2207e-05																				194		0.00797119
											-1.2207e-05																				194.1		0.00799561
											-1.2207e-05																				194.2		0.00800781
											-1.2207e-05																				194.3		0.00800781
											-1.2207e-05																				194.4		0.00800781
											-1.2207e-05																				194.5		0.00800781
											-1.0986e-05																				194.6		0.00799561
											-1.2207e-05																				194.7		0.00800781
											-1.0986e-05																				194.8		0.00800781
											-1.0986e-05																				194.9		0.00800781
											-9.7656e-06																				195		0.0079834
											-9.7656e-06																				195.1		0.0079834
											-1.0986e-05																				195.2		0.00797119
											-1.0986e-05																				195.3		0.00799561
											-1.0986e-05																				195.4		0.00800781
											-1.0986e-05																				195.5		0.0079834
											-1.0986e-05																				195.6		0.00799561
											-1.0986e-05																				195.7		0.00799561
											-1.0986e-05																				195.8		0.00795898
											-1.0986e-05																				195.9		0.00799561
											-1.0986e-05																				196		0.00799561
											-1.2207e-05																				196.1		0.00800781
											-1.2207e-05																				196.2		0.00800781
											-1.0986e-05																				196.3		0.00800781
											-1.0986e-05																				196.4		0.00799561
											-1.0986e-05																				196.5		0.00800781
											-1.2207e-05																				196.6		0.00799561
											-1.0986e-05																				196.7		0.00800781
											-1.0986e-05																				196.8		0.00800781
											-1.0986e-05																				196.9		0.00800781
											-1.0986e-05																				197		0.00800781
											-1.0986e-05																				197.1		0.0079834
											-1.0986e-05																				197.2		0.00802002
											-9.7656e-06																				197.3		0.00803223
											-9.7656e-06																				197.4		0.00803223
											-1.0986e-05																				197.5		0.00802002
											-1.2207e-05																				197.6		0.00802002
											-1.0986e-05																				197.7		0.00800781
											-1.0986e-05																				197.8		0.00800781
											-1.2207e-05																				197.9		0.00802002
											-1.2207e-05																				198		0.00803223
											-1.2207e-05																				198.1		0.00802002
											-1.0986e-05																				198.2		0.00800781
											-1.0986e-05																				198.3		0.00800781
											-1.2207e-05																				198.4		0.00800781
											-1.0986e-05																				198.5		0.00800781
											-1.0986e-05																				198.6		0.00800781
											-9.7656e-06																				198.7		0.00800781
											-1.0986e-05																				198.8		0.00800781
											-1.0986e-05																				198.9		0.00800781
											-1.2207e-05																				199		0.00800781
											-1.2207e-05																				199.1		0.00803223
											-1.0986e-05																				199.2		0.00803223
											-1.0986e-05																				199.3		0.00800781
											-1.2207e-05																				199.4		0.00802002
											-1.3428e-05																				199.5		0.00802002
											-1.2207e-05																				199.6		0.00800781
											-1.0986e-05																				199.7		0.00800781
											-1.2207e-05																				199.8		0.00800781
											-1.0986e-05																				199.9		0.00800781
[truncated: 421 more rows]
