# Supplementary material for: The fluoride permeation pathway and anion recognition in Fluc family fluoride channels
Source: eLife. 2021 Jul 12;10:e69482. doi: 10.7554/eLife.69482 (PMC8315801; doi:10.7554/eLife.69482)
Supplement: Figure 2—source data 2. [file elife-69482-fig2-data2.xlsx]

## Sheet: Sheet1
Single channel replicates (S81A):			3.55	pS
			3.35
			4.1
			3.75
			4
			3.35
			3.75
