# Supplementary material for: The fluoride permeation pathway and anion recognition in Fluc family fluoride channels
Source: eLife. 2021 Jul 12;10:e69482. doi: 10.7554/eLife.69482 (PMC8315801; doi:10.7554/eLife.69482)
Supplement: Figure 2—source data 3. [file elife-69482-fig2-data3.xlsx]

## Sheet: Sheet1
			Ec2-S81C							Ec2-WT				Bpe-S83C
pH
7.4	0.19	0.1	0.15	0.17	0.2	0.11			0.9217	0.8924	1.033	1.16		0.09		0.06
5.5	1	1	1	1	1	1	1	1	1	1	1	1	1	1	1	1
7.1	0.27	0.15	0.1	0.05	0.14	0.02	0.95	1	0.9832	0.9569	1.0202	1.02	0.004		0.05	0.145
		Independent preps colored differently
