# Supplementary material for: The fluoride permeation pathway and anion recognition in Fluc family fluoride channels
Source: eLife. 2021 Jul 12;10:e69482. doi: 10.7554/eLife.69482 (PMC8315801; doi:10.7554/eLife.69482)
Supplement: Figure 2—source data 4. [file elife-69482-fig2-data4.xlsx]

## Sheet: Sheet1
Ec2-S81C_A_1	Time (s)	Trace #1 (pA)		Ec2-S81C_A_2	Time (s)	Trace #1 (pA)		Ec2-S81C_A_3	0	-12.207		Ec2-S81C_B_1	Time (s)	Trace #1 (pA)		Ec2-S81C_B_2	Time (s)	Trace #1 (pA)		Ec2-S81C_B_3	Time (s)	Trace #1 (pA)		Bpe-S83C_A_1	Time (s)	Trace #1 (pA)		Bpe-S83C_A_2	Time (s)	Trace #1 (pA)		Bpe-S83C_A_3	Time (s)	Trace #1 (pA)		Ec2-WT_A_1	Time (s)	Trace #1 (pA)		Ec2-WT_A_2	Time (s)	Trace #1 (pA)		Ec2-WT_B_1	Time (s)	Trace #1 (pA)
	0	-3.94665			0	-26.001			0.1	-14.7095			0	-7.75146			0	-12.4512			0	-11.4136			0	-60.1005			0	-25.5127			0	-94.2383			0	-163.818			0	-150.208			0	-150.085
	0.1	-3.86214			0.1	-26.062			0.2	-12.207			0.1	-8.11767			0.1	-11.7187			0.1	-11.1694			0.1	-55.1071			0.1	-19.104			0.1	-92.3462			0.1	-163.239			0.1	-148.865			0.1	-149.719
	0.2	-3.69747			0.2	-25.8789			0.3	-13.855			0.2	-9.09424			0.2	-11.4746			0.2	-12.6343			0.2	-55.1628			0.2	-21.9116			0.2	-95.52			0.2	-162.415			0.2	-150.879			0.2	-146.79
	0.3	-3.774			0.3	-25.9399			0.4	-15.686			0.3	-9.15527			0.3	-13.3057			0.3	-13.4277			0.3	-51.0781			0.3	-19.4092			0.3	-94.8486			0.3	-162.842			0.3	-149.506			0.3	-147.827
	0.4	-3.76521			0.4	-27.0386			0.5	-12.9395			0.4	-8.54492			0.4	-10.9863			0.4	-11.5356			0.4	-57.3968			0.4	-21.5454			0.4	-89.1724			0.4	-164.551			0.4	-150.97			0.4	-149.048
	0.5	-4.06589			0.5	-26.4282			0.6	-11.7187			0.5	-6.53076			0.5	-12.9395			0.5	-12.6953			0.5	-55.6311			0.5	-21.4844			0.5	-98.1445			0.5	-163.635			0.5	-150.543			0.5	-150.33
	0.6	-3.65957			0.6	-27.0386			0.7	-15.3198			0.6	-9.0332			0.6	-11.9629			0.6	-12.207			0.6	-55.0094			0.6	-20.752			0.6	-90.1489			0.6	-163.574			0.6	-150.696			0.6	-147.156
	0.7	-4.03403			0.7	-25.6958			0.8	-15.0146			0.7	-8.66699			0.7	-12.8784			0.7	-12.6953			0.7	-54.3038			0.7	-22.522			0.7	-93.8721			0.7	-162.506			0.7	-151.52			0.7	-149.841
	0.8	-3.59458			0.8	-26.1841			0.9	-14.4043			0.8	-8.30078			0.8	-12.8784			0.8	-12.2681			0.8	-53.3544			0.8	-22.583			0.8	-89.7217			0.8	-161.774			0.8	-151.825			0.8	-149.841
	0.9	-3.97823			0.9	-27.771			1	-14.1602			0.9	-9.15527			0.9	-12.4512			0.9	-11.9019			0.9	-52.8325			0.9	-22.3999			0.9	-92.9565			0.9	-162.659			0.9	-151.184			0.9	-148.804
	1	-3.77733			1	-26.062			1.1	-14.0381			1	-8.60596			1	-11.2305			1	-13.3057			1	-53.737			1	-20.9351			1	-90.3931			1	-162.354			1	-150.208			1	-149.231
	1.1	-4.05615			1.1	-28.0151			1.2	-15.0146			1.1	-7.93457			1.1	-13.5498			1.1	-12.4512			1.1	-56.413			1.1	-16.1133			1.1	-91.7969			1.1	-163.788			1.1	-151.489			1.1	-150.879
	1.2	-3.86202			1.2	-25.2686			1.3	-12.9395			1.2	-9.76562			1.2	-12.5122			1.2	-12.2681			1.2	-56.0128			1.2	-23.7427			1.2	-97.6562			1.2	-163.116			1.2	-151.672			1.2	-147.339
	1.3	-3.83715			1.3	-23.3765			1.4	-16.7236			1.3	-6.53076			1.3	-9.52148			1.3	-13.3057			1.3	-51.0205			1.3	-24.0478			1.3	-96.0083			1.3	-163.452			1.3	-149.75			1.3	-150.94
	1.4	-3.9963			1.4	-25.3906			1.5	-13.3667			1.4	-7.9956			1.4	-11.4136			1.4	-11.5356			1.4	-57.1674			1.4	-20.752			1.4	-96.6186			1.4	-162.659			1.4	-151.123			1.4	-147.522
	1.5	-4.07399			1.5	-28.8696			1.6	-13.5498			1.5	-9.76562			1.5	-12.8174			1.5	-12.0239			1.5	-53.4167			1.5	-27.4658			1.5	-95.6421			1.5	-161.987			1.5	-150.574			1.5	-149.536
	1.6	-3.90502			1.6	-26.9165			1.7	-12.7563			1.6	-7.87353			1.6	-13.2446			1.6	-13.855			1.6	-56.8887			1.6	-23.3765			1.6	-93.9941			1.6	-163.452			1.6	-151.031			1.6	-151.611
	1.7	-4.08901			1.7	-24.9634			1.8	-14.4043			1.7	-8.97217			1.7	-11.3525			1.7	-12.5732			1.7	-54.5159			1.7	-23.1934			1.7	-99.2432			1.7	-162.537			1.7	-148.865			1.7	-149.658
	1.8	-3.73337			1.8	-26.7334			1.9	-15.9912			1.8	-10.1318			1.8	-9.64355			1.8	-12.2681			1.8	-53.6541			1.8	-20.0806			1.8	-92.4683			1.8	-161.987			1.8	-149.139			1.8	-147.156
	1.9	-3.75629			1.9	-27.2827			2	-14.5264			1.9	-7.9956			1.9	-5.37109			1.9	-13.7939			1.9	-53.4162			1.9	-23.8647			1.9	-96.0693			1.9	-162.903			1.9	-149.689			1.9	-149.414
	2	-3.82738			2	-26.7334			2.1	-15.686			2	-9.21631			2	12.7563			2	-13.855			2	-54.464			2	-22.583			2	-97.5342			2	-164.124			2	-151.398			2	-147.461
	2.1	-3.63238			2.1	-28.3203			2.2	-17.5171			2.1	-8.42285			2.1	28.6865			2.1	-12.146			2.1	-53.6955			2.1	-28.9307			2.1	-93.6279			2.1	-163.025			2.1	-151.031			2.1	-152.527
	2.2	-3.8437			2.2	-26.9165			2.3	-16.6626			2.2	-7.9956			2.2	60.1196			2.2	-13.5498			2.2	-53.1746			2.2	-20.813			2.2	-96.6797			2.2	-162.231			2.2	-149.963			2.2	-151.001
	2.3	-3.88223			2.3	-25.8789			2.4	-15.3809			2.3	-9.0332			2.3	85.022			2.3	-11.8408			2.3	-54.682			2.3	-27.2217			2.3	-100.525			2.3	-161.957			2.3	-151.428			2.3	-148.376
	2.4	-3.50526			2.4	-26.3062			2.5	-14.1602			2.4	-6.83594			2.4	105.164			2.4	-12.5732			2.4	-55.6475			2.4	-23.6206			2.4	-91.0034			2.4	-162.659			2.4	-150.024			2.4	-147.339
	2.5	-3.92157			2.5	-26.5503			2.6	-15.686			2.5	-9.21631			2.5	66.5893			2.5	-13.2446			2.5	-55.2026			2.5	-23.9258			2.5	-98.8769			2.5	-163.391			2.5	-149.597			2.5	-153.137
	2.6	-4.00247			2.6	-24.5972			2.7	-14.0381			2.6	-10.2539			2.6	53.2837			2.6	-12.207			2.6	-55.2404			2.6	-23.5596			2.6	-96.6797			2.6	-164.551			2.6	-147.98			2.6	-149.902
	2.7	-4.00205			2.7	-25.9399			2.8	-16.5405			2.7	-7.9956			2.7	7.14111			2.7	-12.3291			2.7	-55.4018			2.7	-21.7895			2.7	-93.6279			2.7	-164.642			2.7	-149.994			2.7	-149.292
	2.8	-4.14121			2.8	-25.4517			2.9	-15.686			2.8	-7.62939			2.8	47.1191			2.8	-13.2446			2.8	-49.9247			2.8	-22.8271			2.8	-95.3369			2.8	-163.849			2.8	-147.797			2.8	-151.489
	2.9	-3.58374			2.9	-25.6348			3	-15.3809			2.9	-8.8501			2.9	181.946			2.9	-12.6343			2.9	-53.3421			2.9	-21.6675			2.9	-93.75			2.9	-163.788			2.9	-146.545			2.9	-152.283
	3	-3.73272			3	-25.5737			3.1	-15.1367			3	-8.91113			3	215.21			3	-12.6953			3	-53.209			3	-26.4893			3	-101.318			3	-164.307			3	-149.811			3	-151.123
	3.1	-3.98994			3.1	-27.6489			3.2	-19.9585			3.1	-7.01904			3.1	3.05176			3.1	-14.8926			3.1	-54.8779			3.1	-24.6582			3.1	-90.3931			3.1	-163.635			3.1	-147.125			3.1	-149.231
	3.2	-4.1381			3.2	-30.2124			3.3	-17.6392			3.2	-8.23975			3.2	-9.27734			3.2	-14.2212			3.2	-54.6977			3.2	-21.8506			3.2	-88.6841			3.2	-163.727			3.2	-148.437			3.2	-152.588
	3.3	-3.42135			3.3	-26.9165			3.4	-14.0381			3.3	-7.8125			3.3	-1.0376			3.3	-14.7095			3.3	-53.9024			3.3	-18.2495			3.3	-103.882			3.3	-164.581			3.3	-146.21			3.3	-151.001
	3.4	-3.57425			3.4	-26.6113			3.5	-15.686			3.4	-7.44629			3.4	524.597			3.4	-14.3433			3.4	-57.498			3.4	-21.9116			3.4	-94.2993			3.4	-165.131			3.4	-141.083			3.4	-148.804
	3.5	-2.99111			3.5	-28.0762			3.6	-15.5029			3.5	-7.69043			3.5	640.564			3.5	-13.7939			3.5	-55.5227			3.5	-22.2778			3.5	-96.6186			3.5	-164.185			3.5	-147.919			3.5	-150.574
	3.6	-3.44024			3.6	-30.2124			3.7	-15.0757			3.6	-8.78906			3.6	-38.3301			3.6	-13.1836			3.6	-50.5483			3.6	-23.8037			3.6	-96.6797			3.6	-164.398			3.6	-145.752			3.6	-145.874
	3.7	-3.28652			3.7	-30.0293			3.8	-15.1367			3.7	-7.69043			3.7	-17.6392			3.7	-12.8174			3.7	-50.4154			3.7	-26.6113			3.7	-91.9189			3.7	-165.009			3.7	-141.998			3.7	-144.165
	3.8	-3.69515			3.8	-27.4658			3.9	-15.7471			3.8	-9.70459			3.8	-737.671			3.8	-13.855			3.8	-56.1898			3.8	-25.5737			3.8	-100.342			3.8	-163.727			3.8	-95.4895			3.8	-147.522
	3.9	-3.73286			3.9	-26.9775			4	-15.686			3.9	-8.36182			3.9	-690.735			3.9	-11.8408			3.9	-56.8309			3.9	-21.7285			3.9	-90.8813			3.9	-162.506			3.9	-117.706			3.9	-150.33
	4	-3.49241			4	-25.0244			4.1	-16.2353			4	-10.2539			4	-149.78			4	-14.7705			4	-50.6761			4	-29.2969			4	-93.5059			4	-163.605			4	-99.1516			4	-147.644
	4.1	-3.77035			4.1	-26.3672			4.2	-18.1885			4.1	-9.70459			4.1	-28.6865			4.1	-16.1743			4.1	-52.2575			4.1	-20.6909			4.1	-98.2666			4.1	-162.872			4.1	-68.3288			4.1	-151.916
	4.2	-3.9988			4.2	-25.2686			4.3	-14.4653			4.2	-8.91113			4.2	-31.4941			4.2	-14.0991			4.2	-54.0411			4.2	-16.7847			4.2	-97.6562			4.2	-164.154			4.2	-146.454			4.2	-151.245
	4.3	-3.25644			4.3	-23.6816			4.4	-16.5405			4.3	-7.32422			4.3	749.145			4.3	-11.9019			4.3	-52.9474			4.3	-23.0713			4.3	-101.562			4.3	-163.391			4.3	-124.298			4.3	-150.757
	4.4	-3.47704			4.4	-24.1089			4.5	-12.6343			4.4	-9.33838			4.4	552.49			4.4	-9.64355			4.4	-53.6706			4.4	-25.7568			4.4	-101.135			4.4	-163.177			4.4	-142.822			4.4	-142.151
	4.5	-3.3067			4.5	-24.6582			4.6	-15.0146			4.5	-10.9863			4.5	-31.8603			4.5	-13.5498			4.5	-57.1546			4.5	-30.7007			4.5	-100.22			4.5	-163.025			4.5	-149.139			4.5	-141.296
	4.6	-3.60898			4.6	-26.6113			4.7	-15.8081			4.6	-5.31006			4.6	-47.2412			4.6	-13.6108			4.6	-56.7842			4.6	-31.7383			4.6	-97.7783			4.6	-164.154			4.6	-145.05			4.6	-144.287
	4.7	-3.44145			4.7	-25.8179			4.8	-12.6953			4.7	-6.53076			4.7	-589.111			4.7	-16.5405			4.7	-53.8692			4.7	-27.5879			4.7	-91.1865			4.7	-162.842			4.7	-144.775			4.7	-145.081
	4.8	-3.57416			4.8	-25.6958			4.9	-14.2822			4.8	-6.5918			4.8	-430.603			4.8	-14.5874			4.8	-54.2588			4.8	-22.0337			4.8	-92.9565			4.8	-162.872			4.8	-145.721			4.8	-144.165
	4.9	-3.61483			4.9	-28.0762			5	-15.1978			4.9	-7.75146			4.9	-471.13			4.9	-15.0146			4.9	-49.3021			4.9	-23.7427			4.9	-116.15			4.9	-164.185			4.9	-147.308			4.9	-147.583
	5	-3.4146			5	-31.6772			5.1	-16.1133			5	-8.42285			5	-53.4668			5	-13.6719			5	-53.5837			5	-23.6206			5	-146.362			5	-164.154			5	-148.041			5	-137.512
	5.1	-3.3233			5.1	-26.4282			5.2	-14.0381			5.1	-6.95801			5.1	-61.8896			5.1	-14.4043			5.1	-53.0049			5.1	-22.522			5.1	-71.9604			5.1	-163.696			5.1	-147.736			5.1	-148.56
	5.2	-3.58038			5.2	-24.0478			5.3	-12.6343			5.2	-7.93457			5.2	406.921			5.2	-11.2915			5.2	-53.4763			5.2	-28.9307			5.2	-76.5991			5.2	-164.825			5.2	-146.179			5.2	-133.789
	5.3	-4.02112			5.3	-24.8413			5.4	-13.916			5.3	-7.08008			5.3	427.063			5.3	-11.4746			5.3	-52.9405			5.3	-19.043			5.3	-91.98			5.3	-163.635			5.3	-148.346			5.3	-106.934
	5.4	-4.08591			5.4	-26.8555			5.5	-13.4277			5.4	-8.11767			5.4	-61.2793			5.4	-13.1226			5.4	-43.8539			5.4	-17.395			5.4	-100.037			5.4	-163.452			5.4	-149.902			5.4	-133.484
	5.5	-3.9164			5.5	-28.5034			5.6	-14.0991			5.5	-8.05664			5.5	-67.1997			5.5	-8.78906			5.5	-21.2689			5.5	-17.6392			5.5	-90.6982			5.5	-162.476			5.5	-151.062			5.5	-151.367
	5.6	-3.71618			5.6	-25.2686			5.7	-12.8784			5.6	-8.66699			5.6	-51.2085			5.6	-6.22559			5.6	-42.461			5.6	-24.292			5.6	-96.5576			5.6	-161.652			5.6	-151.947			5.6	-162.354
	5.7	-3.45301			5.7	-26.3672			5.8	-17.4561			5.7	-8.23975			5.7	-529.114			5.7	-1.15967			5.7	-61.6575			5.7	-21.2402			5.7	-96.2524			5.7	-153.687			5.7	-152.069			5.7	-150.269
	5.8	-3.7867			5.8	-26.001			5.9	-16.9678			5.8	-8.05664			5.8	-300.293			5.8	22.2778			5.8	-50.7775			5.8	-27.8931			5.8	-114.258			5.8	-141.327			5.8	-150.024			5.8	-147.339
	5.9	-4.02194			5.9	-26.123			6	-16.4795			5.9	-6.40869			5.9	-635.315			5.9	28.1982			5.9	-49.2172			5.9	-20.9961			5.9	-128.601			5.9	-146.118			5.9	-149.384			5.9	-144.043
	6	-4.15988			6	-26.3672			6.1	-13.6108			6	-8.17871			6	-53.4058			6	-16.4185			6	-52.1389			6	-20.2026			6	-68.2983			6	-140.9			6	-151.184			6	-138.977
	6.1	-3.70464			6.1	-24.9023			6.2	-14.8926			6.1	-6.95801			6.1	-36.8042			6.1	10.3149			6.1	-52.2935			6.1	-22.7661			6.1	-98.3887			6.1	-151.916			6.1	-153.107			6.1	-158.691
	6.2	-3.9387			6.2	-25.2075			6.3	-13.4888			6.2	-8.23975			6.2	-88.8061			6.2	10.2539			6.2	-48.0337			6.2	-25.2075			6.2	-120.666			6.2	-125.641			6.2	-151.611			6.2	-147.644
	6.3	0.753056			6.3	-25.3296			6.4	-17.0898			6.3	-7.9956			6.3	-113.098			6.3	-1.2207			6.3	-41.2968			6.3	-23.0713			6.3	-119.019			6.3	-120.728			6.3	-153.29			6.3	-149.841
	6.4	-2.84586			6.4	-24.9023			6.5	-16.4795			6.4	-8.48389			6.4	-79.834			6.4	-0.976562			6.4	-64.1577			6.4	-28.4424			6.4	-125.305			6.4	-112.549			6.4	-151.031			6.4	-124.634
	6.5	-3.11342			6.5	-24.292			6.6	-12.085			6.5	-9.0332			6.5	-61.6455			6.5	-4.08935			6.5	-49.4535			6.5	-23.9868			6.5	-117.615			6.5	-9.85718			6.5	-150.696			6.5	-174.927
	6.6	-2.80919			6.6	-26.123			6.7	-17.2729			6.6	-8.91113			6.6	-58.7158			6.6	-14.7095			6.6	-44.8103			6.6	-25.5737			6.6	-123.657			6.6	-130.157			6.6	-152.527			6.6	-160.522
	6.7	-3.62841			6.7	-25.6348			6.8	-13.7939			6.7	-7.08008			6.7	-54.8096			6.7	-11.2305			6.7	-18.8155			6.7	-25.0244			6.7	-121.948			6.7	-153.046			6.7	-151.367			6.7	-131.836
	6.8	-3.87568			6.8	-25.0244			6.9	-15.0757			6.8	-8.05664			6.8	-53.0395			6.8	-13.7329			6.8	-8.52658			6.8	-22.8882			6.8	-121.704			6.8	-147.491			6.8	-150.909			6.8	-121.277
	6.9	-4.35596			6.9	-26.4282			7	-15.0146			6.9	-5.98144			6.9	-54.5654			6.9	-8.54492			6.9	-25.1648			6.9	-24.4141			6.9	-121.521			6.9	42.511			6.9	-147.766			6.9	-128.601
	7	-3.73231			7	-27.71			7.1	-12.5732			7	-5.00488			7	-52.9175			7	2.0752			7	-48.5982			7	-27.71			7	-128.479			7	-20.874			7	-149.841			7	-154.602
	7.1	-3.16945			7.1	-27.6489			7.2	-14.4653			7.1	-4.15039			7.1	-53.5889			7.1	-10.437			7.1	-39.0797			7.1	-25.0854			7.1	-111.084			7.1	-139.374			7.1	-152.405			7.1	-168.457
	7.2	-3.342			7.2	-28.5034			7.3	-11.5967			7.2	-21.6064			7.2	-54.7485			7.2	-14.7095			7.2	-39.2465			7.2	-27.9541			7.2	-110.168			7.2	-175.11			7.2	-150.665			7.2	-151.489
	7.3	-1.24513			7.3	-26.8555			7.4	-15.0757			7.3	-10.376			7.3	-53.0395			7.3	-30.8228			7.3	-48.0244			7.3	-26.3672			7.3	-152.466			7.3	-160.248			7.3	-150.482			7.3	-172.546
	7.4	-0.019779			7.4	-28.0151			7.5	-15.8081			7.4	-11.4136			7.4	-54.4434			7.4	-6.34766			7.4	-38.3774			7.4	-26.9165			7.4	-220.764			7.4	-160.858			7.4	-150.085			7.4	-153.503
	7.5	-5.84382			7.5	-24.4751			7.6	-15.2588			7.5	-8.97217			7.5	-55.2368			7.5	-1.28174			7.5	6.19531			7.5	-14.4043			7.5	-96.1304			7.5	-207.367			7.5	-151.215			7.5	-165.771
	7.6	-4.02105			7.6	-26.123			7.7	-15.686			7.6	-9.27734			7.6	-54.6875			7.6	-2.56348			7.6	-28.4356			7.6	-5.92041			7.6	-95.52			7.6	-210.937			7.6	-151.123			7.6	-144.836
	7.7	-1.79423			7.7	-26.123			7.8	-16.8457			7.7	-10.1929			7.7	-55.2368			7.7	-5.06592			7.7	-52.7463			7.7	3.66211			7.7	-103.516			7.7	-334.564			7.7	-151.245			7.7	-153.87
	7.8	-2.10936			7.8	-26.062			7.9	-14.3433			7.8	-7.44629			7.8	-51.6968			7.8	-10.1318			7.8	-56.647			7.8	13.4277			7.8	-79.956			7.8	-220.581			7.8	-149.536			7.8	-67.688
	7.9	-0.960634			7.9	-25.7568			8	-15.686			7.9	-8.17871			7.9	-54.1382			7.9	-1.77002			7.9	-51.389			7.9	-0.244141			7.9	-29.9683			7.9	-208.069			7.9	-151.947			7.9	-51.3306
	8	3.66326			8	-24.9023			8.1	-14.7705			8	-5.5542			8	-56.0913			8	22.2778			8	-54.8479			8	-3.17383			8	-61.9507			8	-207.703			8	-150.421			8	-86.9751
	8.1	4.04346			8.1	-23.9258			8.2	-18.0664			8.1	-7.50732			8.1	-54.1992			8.1	106.75			8.1	-743.241			8.1	-13.7939			8.1	-100.83			8.1	-73.6999			8.1	-150.055			8.1	-136.963
	8.2	-1.06727			8.2	-26.6724			8.3	-12.7563			8.2	-7.32422			8.2	-54.1382			8.2	128.723			8.2	-48.5714			8.2	-13.3667			8.2	-89.5386			8.2	-176.971			8.2	-151.733			8.2	10.8032
	8.3	-2.49847			8.3	-25.9399			8.4	-15.564			8.3	-5.06592			8.3	-53.3447			8.3	-16.1133			8.3	-54.9647			8.3	-18.6157			8.3	-98.2666			8.3	-165.466			8.3	-151.825			8.3	-147.278
	8.4	-2.48939			8.4	-27.832			8.5	-14.0381			8.4	-3.84521			8.4	-53.772			8.4	-3.96728			8.4	847.832			8.4	9.64355			8.4	-96.0083			8.4	-164.612			8.4	-152.466			8.4	-351.074
	8.5	-1.75709			8.5	-27.71			8.6	-14.0991			8.5	-11.2305			8.5	-53.2837			8.5	-180.298			8.5	-65.097			8.5	327.698			8.5	-96.3745			8.5	-162.292			8.5	-152.405			8.5	-154.114
	8.6	-1.51233			8.6	-26.6113			8.7	-18.5547			8.6	-10.498			8.6	-55.603			8.6	-44.1284			8.6	-1117.69			8.6	347.046			8.6	-95.1538			8.6	-158.569			8.6	-152.405			8.6	-662.17
	8.7	2.24484			8.7	-27.8931			8.8	-20.813			8.7	-9.0332			8.7	-55.603			8.7	-12.6343			8.7	-49.3519			8.7	149.353			8.7	-88.1958			8.7	-157.715			8.7	-152.954			8.7	-154.968
	8.8	8.03703			8.8	-25.5737			8.9	-20.813			8.8	-9.70459			8.8	-54.8096			8.8	-285.706			8.8	1076.96			8.8	-22.0947			8.8	-69.8852			8.8	-156.464			8.8	-152.252			8.8	103.149
	8.9	12.4815			8.9	-25.5737			9	-19.5312			8.9	-8.97217			8.9	-54.3213			8.9	-15.2588			8.9	-33.8923			8.9	-233.52			8.9	-52.6123			8.9	-155.731			8.9	-152.954			8.9	-422.241
	9	13.1615			9	-25.2075			9.1	-23.8037			9	-9.33838			9	-55.9082			9	-12.9395			9	-53.9955			9	-643.188			9	-38.5132			9	-155.64			9	-152.252			9	-150.208
	9.1	7.3026			9.1	-28.0151			9.2	-28.6255			9.1	-9.09424			9.1	-55.603			9.1	424.316			9.1	-1204.48			9.1	-769.409			9.1	-24.1089			9.1	-153.442			9.1	-152.527			9.1	605.591
	9.2	8.8217			9.2	-26.6724			9.3	-39.7339			9.2	-9.39941			9.2	-53.5278			9.2	279.236			9.2	-46.9512			9.2	-45.6543			9.2	-24.9634			9.2	-154.053			9.2	-151.581			9.2	-167.419
	9.3	5.94587			9.3	-27.5269			9.4	-23.6206			9.3	-5.98144			9.3	-54.0161			9.3	-23.4375			9.3	-47.7362			9.3	977.051			9.3	-16.4795			9.3	-154.999			9.3	-153.229			9.3	-162.659
	9.4	-4.94489			9.4	-28.1982			9.5	-10.1318			9.4	-5.67627			9.4	-54.5654			9.4	-574.402			9.4	-54.9204			9.4	604.126			9.4	-9.21631			9.4	-154.816			9.4	-150.757			9.4	226.807
	9.5	-3.02866			9.5	-26.9165			9.6	-14.0381			9.5	-7.44629			9.5	-54.8096			9.5	-6.71387			9.5	-71.2484			9.5	85.3271			9.5	-8.17871			9.5	-153.778			9.5	-150.482			9.5	-150.208
	9.6	-3.54652			9.6	-27.4048			9.7	-14.9536			9.6	-7.32422			9.6	-53.2837			9.6	-8.05664			9.6	-132.953			9.6	-70.4346			9.6	9.46045			9.6	-155.67			9.6	-153.351			9.6	-121.948
	9.7	-3.20561			9.7	-26.2451			9.8	-13.3057			9.7	-7.44629			9.7	-54.3213			9.7	-20.752			9.7	-58.7594			9.7	-298.157			9.7	-23.4985			9.7	-155.67			9.7	-153.168			9.7	518.738
	9.8	-2.70879			9.8	-26.001			9.9	-16.5405			9.8	-7.93457			9.8	-54.1992			9.8	222.961			9.8	-9.57496			9.8	-702.698			9.8	-8.66699			9.8	-156.952			9.8	-154.053			9.8	-257.263
	9.9	-2.08717			9.9	-27.6489			10	-12.4512			9.9	-11.1084			9.9	-54.0771			9.9	0.12207			9.9	-2.13647			9.9	-772.217			9.9	-3.90625			9.9	-156.158			9.9	-153.564			9.9	-149.536
	10	-2.2444			10	-24.5361			10.1	-16.3574			10	-10.376			10	-64.0259			10	-2.2583			10	-0.763157			10	-79.2847			10	-2.44141			10	-156.342			10	-153.625			10	110.901
	10.1	-2.32572			10.1	-24.7192			10.2	-12.8174			10.1	-8.8501			10.1	-56.9458			10.1	-373.23			10.1	-0.147727			10.1	538.208			10.1	-1.83105			10.1	-157.349							10.1	-932.312
	10.2	-4.63933			10.2	-26.7944			10.3	-11.6577			10.2	-9.46045			10.2	-54.3213			10.2	-21.6675			10.2	0.508989			10.2	568.176			10.2	-3.35693			10.2	-157.471							10.2	-177.429
	10.3	-3.44876			10.3	-27.4048			10.4	-14.8926			10.3	-7.62939			10.3	-54.5654			10.3	-23.4985			10.3	1.60334			10.3	-61.2183			10.3	-2.0752			10.3	-157.013							10.3	-137.329
	10.4	-2.7295			10.4	-26.8555			10.5	-14.7705			10.4	-10.3149			10.4	-55.1147			10.4	542.908			10.4	1.67077			10.4	-95.52			10.4	-2.50244			10.4	-157.532							10.4	-672.546
	10.5	-3.35043			10.5	-24.7803			10.6	-15.2588			10.5	-8.72803			10.5	-54.0771			10.5	374.817			10.5	1.59967			10.5	-571.96			10.5	-0.976562			10.5	-156.769							10.5	-91.0034
	10.6	74.0045			10.6	-26.6724			10.7	-18.9819			10.6	-7.20215			10.6	-54.7485			10.6	-32.959			10.6	2.77418			10.6	-970.825			10.6	-1.77002			10.6	-155.426							10.6	-145.874
	10.7	-69.0857			10.7	-26.001			10.8	-18.7988			10.7	-8.11767			10.7	-55.1758			10.7	-9.0332			10.7	1.68613			10.7	-234.863			10.7	0.244141			10.7	-156.433							10.7	-139.648
	10.8	-70.0855			10.8	-25.0244			10.9	-16.2353			10.8	-5.67627			10.8	-54.6265			10.8	-301.941			10.8	-0.503331			10.8	-244.141			10.8	-0.915527			10.8	-156.372							10.8	913.208
	10.9	-22.2469			10.9	-25.0244			11	-17.2729			10.9	-4.5166			10.9	-52.7344			10.9	-17.6392			10.9	0.467764			10.9	-241.821			10.9	-0.915527			10.9	-156.525							10.9	-702.881
	11	-2.33984			11	-26.5503			11.1	-16.9678			11	-0.30518			11	-50.8423			11	841.186			11	2.93592			11	-255.188			11	1.95312			11	-156.647							11	-181.274
	11.1	-3.62295			11.1	-27.6489			11.2	-16.2353			11.1	7.8125			11.1	-52.0019			11.1	205.811			11.1	3.62244			11.1	-375.915			11.1	0.854492											11.1	-180.42
	11.2	238.777			11.2	-27.832			11.3	-16.4795			11.2	29.7241			11.2	-54.6875			11.2	-4.27246			11.2	2.91696			11.2	-354.858			11.2	-0.976562											11.2	-143.127
	11.3	647.43			11.3	-25.0854			11.4	-14.2212			11.3	48.1567			11.3	-54.5654			11.3	-37.9028			11.3	1.89905			11.3	-308.411			11.3	-0.488281											11.3	-110.046
	11.4	552.714			11.4	-28.5034			11.5	-15.7471			11.4	46.936			11.4	-54.9927			11.4	-524.536			11.4	1.36833			11.4	-292.358			11.4	-1.46484											11.4	-124.268
	11.5	-11.5612			11.5	-25.5127			11.6	-13.855			11.5	23.3765			11.5	-53.7109			11.5	-34.0576			11.5	1.32017			11.5	-293.091			11.5	-0.244141											11.5	-133.301
	11.6	0.355704			11.6	-28.3203			11.7	-17.4561			11.6	-1.83105			11.6	-53.4058			11.6	233.887			11.6	0.403986			11.6	-289.124			11.6	-0.671387											11.6	-134.094
	11.7	44.5335			11.7	-26.9775			11.8	-16.3574			11.7	-7.26318			11.7	-55.7861			11.7	173.523			11.7	1.17651			11.7	-287.659			11.7	1.09863											11.7	-137.451
	11.8	22.1291			11.8	-28.0151			11.9	-20.3857			11.8	0.915527			11.8	-53.7109			11.8	-87.2803			11.8	0.912709			11.8	-289.429			11.8	-1.34277											11.8	-138.55
	11.9	-6.31375			11.9	-25.8789			12	-19.4092			11.9	0.427246			11.9	-54.5654			11.9	-246.521			11.9	1.85481			11.9	-295.593			11.9	-3.35693											11.9	-144.348
	12	-12.8356			12	-25.9399			12.1	-24.9634			12	-6.04248			12	-55.1147			12	-539.551			12	-1.60608			12	-294.983			12	-1.28174											12	-140.747
	12.1	-16.8229			12.1	-28.3203			12.2	-28.3203			12.1	5.12695			12.1	-55.7861			12.1	-77.7588			12.1	-0.448724			12.1	-288.208			12.1	-1.58691											12.1	-138.123
	12.2	-15.8525			12.2	-28.1372			12.3	-23.8037			12.2	1.58691			12.2	-53.5278			12.2	-79.4067			12.2	0.096567			12.2	-286.621			12.2	-0.793457											12.2	-136.291
	12.3	-16.5887			12.3	-30.0293			12.4	-21.3623			12.3	55.8472			12.3	-55.0537			12.3	-128.845			12.3	0.660783			12.3	-292.419			12.3	-1.15967											12.3	-138
	12.4	-16.4031			12.4	-26.7334			12.5	-20.4468			12.4	111.938			12.4	-54.7485			12.4	-184.143			12.4	0.341954			12.4	-285.95			12.4	-0.915527											12.4	-137.939
	12.5	-19.126			12.5	-26.9775			12.6	18.4937			12.5	119.263			12.5	-53.7109			12.5	-166.931			12.5	-0.19843			12.5	-287.292			12.5	-0.732422											12.5	-136.963
	12.6	-17.9919			12.6	-27.5879			12.7	-14.0991			12.6	20.5688			12.6	-55.1758			12.6	-104.858			12.6	0.157481			12.6	-286.255			12.6	-0.732422											12.6	-136.719
	12.7	-18.6874			12.7	-28.0762			12.8	-13.0005			12.7	-2.0752			12.7	-54.1992			12.7	-83.5571			12.7	0.344505			12.7	-289.001			12.7	-1.34277											12.7	-137.451
	12.8	-17.9843			12.8	-28.3813			12.9	-14.2212			12.8	1.95312			12.8	-54.9927			12.8	-76.1719			12.8	0.116324			12.8	-291.26															12.8	-160.461
	12.9	-17.9949			12.9	-25.8179			13	-11.2305			12.9	-51.6357			12.9	-53.7109			12.9	-74.646			12.9	0.687644			12.9	-289.978															12.9	-135.681
	13	-17.5527			13	-27.771			13.1	-13.6108			13	-90.8203			13	-56.2134			13	-77.8198			13	0.547266			13	-285.095															13	-137.573
	13.1	-17.8325			13.1	-29.4189			13.2	-16.8457			13.1	87.5244			13.1	-55.4199			13.1	-73.7915			13.1	0.4674			13.1	-287.109															13.1	-140.32
	13.2	-17.3485			13.2	-27.4048			13.3	-18.5547			13.2	-64.27			13.2	-54.3213			13.2	-73.1811			13.2	0.14135			13.2	-285.4															13.2	-138.184
	13.3	-17.4186			13.3	-26.123			13.4	-29.541			13.3	-208.862			13.3	-54.3823			13.3	-75.1343			13.3	0.22954			13.3	-294.373															13.3	-138.977
	13.4	-17.9993			13.4	-28.5034			13.5	-16.8457			13.4	-216.675			13.4	-55.481			13.4	-74.2798			13.4	0.176963			13.4	-290.405															13.4	-137.756
	13.5	-18.5347			13.5	-30.3955			13.6	-16.2964			13.5	-69.0918			13.5	-54.6875			13.5	-73.9746			13.5	0.297605			13.5	-291.26															13.5	-138.977
	13.6	-18.3382			13.6	-28.3203			13.7	-77.3315			13.6	-200.195			13.6	-55.1147			13.6	-74.9512			13.6	0.259596			13.6	-292.664															13.6	-138.123
	13.7	-18.8817			13.7	-26.9165			13.8	-125.122			13.7	-823.791			13.7	-55.7251			13.7	-74.2798			13.7	-0.315105			13.7	-295.959															13.7	-139.221
	13.8	-18.5366			13.8	-32.1045			13.9	-4.27246			13.8	-82.0312			13.8	-56.7627			13.8	-73.6084			13.8	-0.503657			13.8	-287.231															13.8	-139.282
	13.9	-18.8208			13.9	-26.5503			14	-10.8032			13.9	-12.5732			13.9	-55.542			13.9	-72.2656			13.9	-0.423723			13.9	-300.842															13.9	-137.695
	14	-19.1162			14	-30.2734			14.1	-52.1851			14	82.4585			14	-55.9692			14	-73.4863			14	0.0116323			14	-300.598															14	-138.855
	14.1	-19.3446			14.1	-28.5645			14.2	248.962			14.1	346.863			14.1	-54.7485			14.1	-73.2422			14.1	-0.0568141			14.1	-293.701															14.1	-139.404
	14.2	-19.7064			14.2	-29.48			14.3	240.784			14.2	-4.94385			14.2	-54.0161			14.2	-73.3032			14.2	0.18066			14.2	-298.767															14.2	-139.77
	14.3	-19.6956			14.3	-25.8179			14.4	-50.1099			14.3	-1289.37			14.3	-54.5654			14.3	-72.0215			14.3	1.24473			14.3	-295.288															14.3	-139.038
	14.4	-19.0722			14.4	-27.771			14.5	-33.9966			14.4	-6.34766			14.4	-55.2368			14.4	-74.2187			14.4	-1.79458			14.4	-297.302															14.4	-138.977
	14.5	-19.5294			14.5	-31.7383			14.6	-37.5977			14.5	17.395			14.5	-54.9316			14.5	-71.9604			14.5	0.0340232			14.5	-294.556															14.5	-140.259
	14.6	-19.4509			14.6	-28.8086			14.7	-39.7339			14.6	424.377			14.6	-54.1992			14.6	-72.998			14.6	-0.257379			14.6	-296.936															14.6	-139.526
	14.7	-19.3938			14.7	-26.5503			14.8	-46.1426			14.7	-3.54004			14.7	-54.7485			14.7	-74.4018			14.7	-0.140578			14.7	-304.687															14.7	-139.221
	14.8	-19.9522			14.8	-27.9541			14.9	-44.6777			14.8	-618.652			14.8	-54.0771			14.8	-72.3267							14.8	-294.8															14.8	-139.832
	14.9	-20.1676			14.9	-30.1514			15	-50.6592			14.9	-6.65283			14.9	-55.2368			14.9	-71.9604							14.9	-294.25															14.9	-139.465
	15	-19.3853			15	-28.9307			15.1	-50.7202			15	-4.15039			15	-54.3213			15	-72.0825							15	-293.457															15	-141.174
	15.1	-20.4391			15.1	-31.0059			15.2	-50.293			15.1	-87.5244			15.1	-54.2603			15.1	-72.7539							15.1	-294.861															15.1	-137.39
	15.2	-20.6378			15.2	-30.5176			15.3	-48.3398			15.2	-133.667			15.2	-56.1523			15.2	-71.7163							15.2	-292.908															15.2	-138.733
	15.3	-19.6464			15.3	-31.0669			15.4	-50.5371			15.3	-57.9834			15.3	-56.3354			15.3	-71.7773							15.3	-294.495															15.3	-137.756
	15.4	-19.5152			15.4	-31.1279			15.5	-52.063			15.4	-25.2075			15.4	-55.7251			15.4	-74.1577							15.4	-292.847															15.4	-139.465
	15.5	-19.7853			15.5	-26.9775			15.6	-49.6826			15.5	-21.9727			15.5	-56.3965			15.5	-73.3032							15.5	-297.668															15.5	-140.564
	15.6	-19.7956			15.6	-30.2734			15.7	-50.8423			15.6	-17.7612			15.6	-55.481			15.6	-74.585							15.6	-302.673															15.6	-139.282
	15.7	-20.0411			15.7	-28.9917			15.8	-56.5186			15.7	-18.6157			15.7	-56.9458			15.7	-72.6318							15.7	-294.434															15.7	-139.099
	15.8	-19.756			15.8	-31.8603			15.9	-50.8423			15.8	-19.7754			15.8	-54.2603			15.8	-72.937							15.8	-305.359															15.8	-140.625
	15.9	-19.5419			15.9	-31.5552			16	-51.9409			15.9	-18.9819			15.9	-53.6499			15.9	-72.5708							15.9	-306.335															15.9	-140.686
	16	-19.845			16	-27.2217			16.1	-52.6123			16	-18.4326			16	-54.9927			16	-73.0591							16	-305.115															16	-140.442
	16.1	-19.0465			16.1	-29.8462			16.2	-52.5513			16.1	-19.2871			16.1	-56.0303			16.1	-75.0122							16.1	-304.871															16.1	-138.672
	16.2	-19.734			16.2	-27.4048			16.3	-49.3774			16.2	-19.165			16.2	-55.3589			16.2	-75.7446							16.2	-306.213															16.2	-140.503
	16.3	-19.397			16.3	-28.8696			16.4	-52.9175			16.3	-20.0195			16.3	-57.0679			16.3	-74.7681							16.3	-309.936															16.3	-140.808
	16.4	-19.995			16.4	-27.5269			16.5	-49.9878			16.4	-19.165			16.4	-55.2978			16.4	-74.4018							16.4	-309.753															16.4	-140.808
	16.5	-19.8832			16.5	-27.5879			16.6	-50.1709			16.5	-20.0806			16.5	-54.5654			16.5	-74.4629							16.5	-304.565															16.5	-139.954
	16.6	-19.7931			16.6	-28.9917			16.7	-47.3633			16.6	-19.104			16.6	-55.481			16.6	-73.9136							16.6	-306.763															16.6	-140.564
	16.7	-20.2099			16.7	-30.0903			16.8	-48.7061			16.7	-20.1416			16.7	-56.3965			16.7	-73.8525							16.7	-304.382															16.7	-140.137
	16.8	-20.5259			16.8	-24.8413			16.9	-49.0723			16.8	-19.6533			16.8	-56.2134			16.8	-74.707							16.8	-307.007															16.8	-141.479
	16.9	-19.5104			16.9	-24.9023			17	-45.227			16.9	-19.7754			16.9	-54.6875			16.9	-76.6601							16.9	-311.523															16.9	-140.747
	17	-19.4282			17	-24.1699			17.1	-51.6357			17	-22.9492			17	-54.8096			17	-77.2095							17	-305.969															17	-141.174
	17.1	-19.6613			17.1	-25.8179			17.2	-49.0723			17.1	-19.104			17.1	-54.1992			17.1	-76.0498							17.1	-311.768															17.1	-141.846
	17.2	-19.8314			17.2	-21.4233			17.3	-47.3022			17.2	-17.5781			17.2	-56.8237			17.2	-74.707							17.2	-309.814															17.2	-140.198
	17.3	-19.9256			17.3	-26.001			17.4	-49.1333			17.3	-17.7002			17.3	-55.4199			17.3	-75.6226							17.3	-310.303															17.3	-140.93
	17.4	-19.9364			17.4	-18.3716			17.5	-49.2554			17.4	-20.0806			17.4	-56.2744			17.4	-76.477							17.4	-315.674															17.4	-141.541
	17.5	-20.1974			17.5	-18.7378			17.6	-47.3633			17.5	-19.104			17.5	-55.1758			17.5	-76.9043							17.5	-314.026															17.5	-140.076
	17.6	-19.6103			17.6	-14.0991			17.7	-50.9644			17.6	-18.7988			17.6	-55.3589			17.6	-77.5757							17.6	-309.692															17.6	-140.381
	17.7	-19.9889			17.7	-21.2402			17.8	-50.7202			17.7	-19.4092			17.7	-56.2744			17.7	-76.1719							17.7	-310.791															17.7	-140.625
	17.8	-20.2936			17.8	-18.4937			17.9	-41.748			17.8	-18.2495			17.8	-55.0537			17.8	-79.1016							17.8	-308.533															17.8	-140.381
	17.9	-20.0538			17.9	-7.56836			18	-47.7295			17.9	-17.8223			17.9	-54.4434			17.9	-79.5288							17.9	-313.049															17.9	-140.137
	18	-20.4795			18	28.6865			18.1	-47.9126			18	-17.7002			18	-55.7861			18	-77.0264							18	-905.884															18	-140.137
	18.1	-20.5496			18.1	15.5029			18.2	-52.6733			18.1	-16.9067			18.1	-56.0303			18.1	-77.6977							18.1	-1220.76															18.1	-140.137
	18.2	-20.1671			18.2	-27.9541			18.3	-54.9316			18.2	-20.752			18.2	-55.9082			18.2	-78.9795							18.2	-1218.2															18.2	-141.052
	18.3	-20.5554			18.3	-33.7524			18.4	-50.2319			18.3	-20.5688			18.3	-53.1616			18.3	-81.0547							18.3	-313.721															18.3	-142.395
	18.4	-20.8827			18.4	60.73			18.5	-48.8281			18.4	-19.7144			18.4	-54.8096			18.4	-81.1768							18.4	-316.589															18.4	-140.442
	18.5	-20.7278			18.5	-37.9028			18.6	-48.8281			18.5	-21.2402			18.5	-56.9458			18.5	-80.5054							18.5	-313.11															18.5	-139.221
	18.6	-20.9493			18.6	9.09424			18.7	-46.0815			18.6	-21.6064			18.6	-56.4575			18.6	-80.0171							18.6	-320.618															18.6	-139.526
	18.7	-21.1603			18.7	-35.5835			18.8	-48.7671			18.7	-21.6675			18.7	-55.7861			18.7	-81.8481							18.7	-316.162															18.7	-140.747
	18.8	-21.457			18.8	-28.8696			18.9	-50.1099			18.8	-21.0571			18.8	-56.2134			18.8	-80.5664							18.8	-322.937															18.8	-141.357
	18.9	-21.8485			18.9	257.019			19	-50.7202			18.9	-22.0337			18.9	-55.2368			18.9	-80.1392							18.9	-321.411															18.9	-141.724
	19	-21.5383			19	708.374			19.1	-51.5747			19	-21.9116			19	-55.481			19	-78.6743							19	-322.082															19	-141.296
	19.1	-21.7489			19.1	-25.6958			19.2	-52.063			19.1	-21.4844			19.1	-55.2978			19.1	-80.8716							19.1	-319.336															19.1	-141.846
	19.2	-21.8224			19.2	-29.1748			19.3	-50.8423			19.2	-21.3623			19.2	-55.4199			19.2	-84.7168							19.2	-317.749															19.2	-140.503
	19.3	-21.4651			19.3	-598.144			19.4	-54.5654			19.3	-22.522			19.3	-54.1992			19.3	-82.2754							19.3	-331.238															19.3	-141.602
	19.4	-20.2115			19.4	-287.72			19.5	-57.1899			19.4	-21.5454			19.4	-55.9082			19.4	-84.0454							19.4	-320.19															19.4	-141.541
	19.5	-19.4457			19.5	-32.1045			19.6	-50.1709			19.5	-23.4375			19.5	-55.7861			19.5	-81.9702							19.5	-329.224															19.5	-141.418
	19.6	-19.7137			19.6	-48.5229			19.7	-55.4199			19.6	-22.0337			19.6	-56.4575			19.6	-81.8481							19.6	-322.937															19.6	-141.479
	19.7	-19.103			19.7	318.787			19.8	-57.4951			19.7	-23.1323			19.7	-55.2368			19.7	-82.7026							19.7	-326.782															19.7	-142.517
	19.8	-19.541			19.8	542.969			19.9	-54.7485			19.8	-23.3765			19.8	-56.8237			19.8	-89.1724							19.8	-323.12															19.8	-140.747
	19.9	-19.0176			19.9	-80.6885			20	-55.2978			19.9	-24.0478			19.9	-55.1758			19.9	-84.3506							19.9	-322.876															19.9	-140.198
	20	-18.9539			20	-88.3179			20.1	-57.5561			20	-23.0103			20	-54.9316			20	-82.5195							20	-325.5															20	-140.503
	20.1	-19.5835			20.1	-102.173			20.2	-56.7627			20.1	-22.7051			20.1	-55.7251			20.1	-83.1909							20.1	-328.125															20.1	-140.32
	20.2	-20.3918			20.2	-113.586			20.3	-57.251			20.2	-22.8882			20.2	-53.6499			20.2	-83.8013							20.2	-325.073															20.2	-141.479
	20.3	-20.8361			20.3	-130.371			20.4	-58.8989			20.3	-23.6816			20.3	-56.8237			20.3	-84.4726							20.3	-329.895															20.3	-140.503
	20.4	-20.9843			20.4	-156.311			20.5	-60.0586			20.4	-23.2544			20.4	-55.1147			20.4	-86.1816							20.4	-326.477															20.4	-142.09
	20.5	-21.4312			20.5	-166.138			20.6	-56.5186			20.5	-23.1323			20.5	-56.7017			20.5	-87.2803							20.5	-321.96															20.5	-140.747
	20.6	-20.5072			20.6	-173.95			20.7	-57.7393			20.6	-23.2544			20.6	-57.373			20.6	-87.5244							20.6	-322.144															20.6	-141.602
	20.7	-21.6254			20.7	-175.781			20.8	-59.6313			20.7	-22.644			20.7	-56.5186			20.7	-88.4399							20.7	-322.144															20.7	-141.541
	20.8	-20.673			20.8	-182.678			20.9	-60.1807			20.8	-23.8647			20.8	-56.0303			20.8	-88.6841							20.8	-322.754															20.8	-141.052
	20.9	-20.3646			20.9	-185.425			21	-56.1523			20.9	-23.1323			20.9	-55.9692			20.9	-88.1958							20.9	-327.332															20.9	-139.587
	21	-19.735			21	-188.049			21.1	-61.8896			21	-23.9868			21	-56.0303			21	-89.5386							21	-327.576															21	-138.916
	21.1	-20.3164			21.1	-188.354			21.2	-59.3262			21.1	-24.5972			21.1	-57.1899			21.1	-88.0127							21.1	-330.749															21.1	-139.648
	21.2	-20.1403			21.2	-191.223			21.3	-58.3496			21.2	-24.6582			21.2	-57.4341			21.2	-88.9893							21.2	-327.942															21.2	-139.587
	21.3	-20.6899			21.3	-190.979			21.4	-58.8379			21.3	-23.4985			21.3	-54.0771			21.3	-88.0737							21.3	-329.04															21.3	-140.625
	21.4	-21.9636			21.4	-189.453			21.5	-61.4624			21.4	-25.0854			21.4	-58.4717			21.4	-89.8437							21.4	-333.74															21.4	-140.198
	21.5	-23.9313			21.5	-191.895			21.6	-59.6313			21.5	-24.7192			21.5	-56.1523			21.5	-89.7217							21.5	-332.458															21.5	-140.869
	21.6	-28.377			21.6	-191.345			21.7	-59.5093			21.6	-25.3296			21.6	-56.2134			21.6	-89.5386							21.6	-330.017															21.6	-141.479
	21.7	-32.6511			21.7	-191.833			21.8	-62.6221			21.7	-25.5737			21.7	-56.3354			21.7	-91.1865							21.7	-332.947															21.7	-139.648
	21.8	-23.39			21.8	-189.575			21.9	-59.8144			21.8	-27.5269			21.8	-55.1758			21.8	-88.7451							21.8	-332.703															21.8	-140.747
	21.9	-14.014			21.9	-194.031			22	-62.8662			21.9	-26.4893			21.9	-55.1758			21.9	-90.332							21.9	-329.651															21.9	-139.893
	22	-17.6905			22	-195.068			22.1	-61.4014			22	-27.71			22	-57.0679			22	-89.5996							22	-335.144															22	-141.357
	22.1	-19.4119			22.1	-193.054			22.2	-62.3169			22.1	-27.3437			22.1	-58.0444			22.1	-90.6982							22.1	-331.726															22.1	-139.893
	22.2	-21.3271			22.2	-198.242			22.3	-64.27			22.2	-26.5503			22.2	-55.6641			22.2	-91.3696							22.2	-326.599															22.2	-140.93
	22.3	-14.7481			22.3	-199.097			22.4	-68.1763			22.3	-27.4658			22.3	-55.603			22.3	-91.5527							22.3	-337.524															22.3	-138.855
	22.4	-13.7489			22.4	-198.791			22.5	-66.04			22.4	-27.6489			22.4	-54.7485			22.4	-92.8345							22.4	-331.787															22.4	-138.611
	22.5	-24.6281			22.5	-202.942			22.6	-61.9507			22.5	-27.1606			22.5	-55.481			22.5	-91.0644							22.5	-332.397															22.5	-139.343
	22.6	-32.7315			22.6	-200.562			22.7	-61.7676			22.6	-26.9165			22.6	-55.6641			22.6	-91.7358							22.6	-334.534															22.6	-140.32
	22.7	-26.8123			22.7	-200.439			22.8	-64.7583			22.7	-27.771			22.7	-53.5889			22.7	-95.6421							22.7	-334.961															22.7	-139.77
	22.8	-22.2691			22.8	-201.416			22.9	-66.3452			22.8	-27.8931			22.8	-54.8706			22.8	-91.7969							22.8	-332.764															22.8	-140.686
	22.9	-19.3494			22.9	-201.538			23	-64.0869			22.9	-27.4048			22.9	-54.7485			22.9	-94.9097							22.9	-333.069															22.9	-140.32
	23	-1.23024			23	-203.735			23.1	-66.8335			23	-27.2217			23	-54.9927			23	-91.0644							23	-331.97															23	-140.686
	23.1	7.01247			23.1	-203.918			23.2	-67.688			23.1	-28.5034			23.1	-57.251			23.1	-94.9097							23.1	-333.069															23.1	-140.869
	23.2	6.72199			23.2	-203.43			23.3	-62.8662			23.2	-26.9775			23.2	-56.3354			23.2	-96.4355							23.2	-326.477															23.2	-138.855
	23.3	8.4968			23.3	-201.965			23.4	-64.8804			23.3	-27.3437			23.3	-55.542			23.3	-95.3979							23.3	-329.04															23.3	-139.404
	23.4	6.79401			23.4	-205.383			23.5	-64.0869			23.4	-28.0762			23.4	-54.8706			23.4	-95.0928							23.4	-325.989															23.4	-140.198
	23.5	7.92979			23.5	-196.228			23.6	-64.4531			23.5	-29.1138			23.5	-57.8613			23.5	-95.6421							23.5	-327.27															23.5	-140.259
	23.6	37.0252			23.6	-201.965			23.7	-67.0166			23.6	-28.9917			23.6	-53.772			23.6	-97.168							23.6	-331.543															23.6	-139.893
	23.7	-16.0583			23.7	-200.684			23.8	-65.5518			23.7	-28.4424			23.7	-56.7627			23.7	-96.8018							23.7	-319.763															23.7	-139.526
	23.8	126.848			23.8	-201.721			23.9	-64.1479			23.8	-29.2358			23.8	-55.0537			23.8	-97.5342							23.8	-314.331															23.8	-140.503
	23.9	-20.6258			23.9	-203.43			24	-61.8286			23.9	-28.6865			23.9	-56.5186			23.9	-98.2056							23.9	-322.693															23.9	-139.954
	24	-1.99758			24	-199.219			24.1	-61.7676			24	-29.2969			24	-56.8848			24	-98.5107							24	-318.665															24	-141.479
	24.1	-4.13521			24.1	-202.759			24.2	-64.27			24.1	-30.2734			24.1	-56.0913			24.1	-98.8159							24.1	-318.237															24.1	-139.893
	24.2	-25.0972			24.2	-202.942			24.3	-65.4907			24.2	-29.602			24.2	-56.7627			24.2	-98.6328							24.2	-323.181															24.2	-140.503
	24.3	-24.7392			24.3	-201.904			24.4	-65.7349			24.3	-28.9917			24.3	-56.3354			24.3	-98.1445							24.3	-325.012															24.3	-140.442
	24.4	29.1244			24.4	-202.515			24.5	-66.04			24.4	-29.2358			24.4	-55.9692			24.4	-99.2432							24.4	-322.266															24.4	-139.038
	24.5	-13.5008			24.5	-203.918			24.6	-66.4062			24.5	-30.5176			24.5	-57.9224			24.5	-101.074							24.5	-328.735															24.5	-137.451
	24.6	-22.9023			24.6	-207.092			24.7	-67.688			24.6	-29.9072			24.6	-58.1665			24.6	-99.6094							24.6	-327.759															24.6	-140.198
	24.7	-24.9061			24.7	-206.36			24.8	-64.6362			24.7	-30.0903			24.7	-55.6641			24.7	-100.525							24.7	-327.454															24.7	-140.381
	24.8	-24.6266			24.8	-210.083			24.9	-68.0542			24.8	-30.0903			24.8	-56.2744			24.8	-100.647							24.8	-325.684															24.8	-141.418
	24.9	3.34348			24.9	-209.412			25	-66.3452			24.9	-29.1748			24.9	-56.8237			24.9	-102.295							24.9	-326.477															24.9	-139.832
	25	-41.7255			25	-207.825			25.1	-65.918			25	-29.48			25	-56.9458			25	-101.746							25	-327.148															25	-139.832
	25.1	-22.6284			25.1	-207.092			25.2	-69.397			25.1	-30.2734			25.1	-55.481			25.1	-101.807							25.1	-323.547															25.1	-138.733
	25.2	-20.7926			25.2	-211.304			25.3	-67.0776			25.2	-30.7617			25.2	-55.3589			25.2	-101.257							25.2	-328.979															25.2	-138.123
	25.3	-24.0353			25.3	-211.365			25.4	-70.8008			25.3	-29.4189			25.3	-57.9224			25.3	-100.098							25.3	-326.172															25.3	-138.123
	25.4	-137.857			25.4	-212.219			25.5	-68.7256			25.4	-30.2124			25.4	-56.7627			25.4	-99.9145							25.4	-320.679															25.4	-139.954
	25.5	-22.9188			25.5	-212.769			25.6	-66.04			25.5	-31.0669			25.5	-58.3496			25.5	-100.586							25.5	-324.036															25.5	-139.465
	25.6	-49.9508			25.6	-210.449			25.7	-64.8193			25.6	-30.8228			25.6	-55.1147			25.6	-102.478							25.6	-328.064															25.6	-139.587
	25.7	-54.8219			25.7	-210.937			25.8	-61.0962			25.7	-31.6162			25.7	-56.8848			25.7	-103.027							25.7	-323.364															25.7	-140.137
	25.8	-11.8795			25.8	-214.844			25.9	-67.3218			25.8	-32.0435			25.8	-57.9224			25.8	-101.318							25.8	-326.111															25.8	-138.367
	25.9	6.8136			25.9	-215.82			26	-71.228			25.9	-31.4941			25.9	-55.481			25.9	-101.807							25.9	-327.454															25.9	-139.587
	26	-1.73255			26	-209.717			26.1	-73.6694			26	-32.1045			26	-54.3213			26	-101.99							26	-323.669															26	-138.794
	26.1	-12.4714			26.1	-215.454			26.2	-74.0967			26.1	-30.8228			26.1	-56.4575			26.1	-104.431							26.1	-319.153															26.1	-139.099
	26.2	-18.4609			26.2	-213.135			26.3	-74.585			26.2	-32.5317			26.2	-59.021			26.2	-103.271							26.2	-316.711															26.2	-139.465
	26.3	-18.6017			26.3	-217.957			26.4	-75.1343			26.3	-30.5176			26.3	-56.1523			26.3	-103.577							26.3	-315.979															26.3	-140.076
	26.4	-18.6552			26.4	-214.661			26.5	-73.9746			26.4	-31.6162			26.4	-56.8237			26.4	-102.722							26.4	-322.937															26.4	-139.16
	26.5	-19.5213			26.5	-216.675			26.6	-74.3408			26.5	-31.1279			26.5	-57.8003			26.5	-105.103							26.5	-319.214															26.5	-139.587
	26.6	-18.9563			26.6	-213.013			26.7	-76.9653			26.6	-32.959			26.6	-58.5327			26.6	-103.271							26.6	-321.899															26.6	-138.733
	26.7	-19.8321			26.7	-216.187			26.8	-73.6084			26.7	-30.9448			26.7	-57.373			26.7	-105.286							26.7	-321.96															26.7	-139.038
	26.8	-20.7226			26.8	-214.111			26.9	-74.646			26.8	-31.9214			26.8	-56.3965			26.8	-104.797							26.8	-325.439															26.8	-137.878
	26.9	-20.6341			26.9	-216.553			27	-74.646			26.9	-32.2266			26.9	-57.6172			26.9	-106.445							26.9	-323.181															26.9	-138.428
	27	-20.6303			27	-220.764			27.1	-73.5474			27	-31.3721			27	-56.7627			27	-106.75							27	-321.533															27	-138.672
	27.1	-20.3943			27.1	-217.468			27.2	-78.2471			27.1	-32.4707			27.1	-56.4575			27.1	-103.76							27.1	-322.449															27.1	-139.648
	27.2	-19.6952			27.2	-214.722			27.3	-75.5615			27.2	-32.4097			27.2	-56.5186			27.2	-106.018							27.2	-318.542															27.2	-139.404
	27.3	-19.5694			27.3	-218.567			27.4	-74.8291			27.3	-30.7617			27.3	-57.7393			27.3	-105.164							27.3	-324.707															27.3	-137.512
	27.4	-19.9765			27.4	-217.651			27.5	-75.8667			27.4	-32.8979			27.4	-56.3965			27.4	-106.079																							27.4	-138.733
	27.5	-18.6832			27.5	-216.736			27.6	-78.186			27.5	-32.1655			27.5	-57.0068			27.5	-106.873																							27.5	-139.77
	27.6	-18.9696			27.6	-221.619			27.7	-76.5991			27.6	-33.2642			27.6	-56.9458			27.6	-106.628																							27.6	-137.695
	27.7	-18.6224			27.7	-223.816			27.8	-74.585			27.7	-32.8369			27.7	-56.0913			27.7	-106.873																							27.7	-139.77
	27.8	-18.3112			27.8	-224.854			27.9	-77.2705			27.8	-31.9214			27.8	-57.251			27.8	-102.844																							27.8	-139.343
	27.9	-18.8089			27.9	-219.177			28	-78.3691			27.9	-32.1655			27.9	-57.1899			27.9	-106.323																							27.9	-138.916
	28	-18.5891			28	-219.116			28.1	-72.4487			28	-31.311			28	-57.8613			28	-107.3																							28	-137.878
	28.1	-18.4473			28.1	-222.534			28.2	-78.5522			28.1	-31.7383			28.1	-57.251			28.1	-106.689																							28.1	-137.451
	28.2	-17.5097			28.2	-217.041			28.3	-78.5522			28.2	-33.5083			28.2	-56.7017			28.2	-103.821																							28.2	-139.648
	28.3	-18.7017			28.3	-219.543			28.4	-75.5005			28.3	-31.6162			28.3	-56.3354			28.3	-105.774																							28.3	-139.343
	28.4	-18.3603			28.4	-223.938			28.5	-77.3315			28.4	-32.8369			28.4	-56.4575			28.4	-105.957																							28.4	-138.611
	28.5	-18.4994			28.5	-218.933			28.6	-77.6977			28.5	-32.8369			28.5	-57.6172			28.5	-106.14																							28.5	-138.855
	28.6	-18.6014			28.6	-223.999			28.7	-78.064			28.6	-33.9966			28.6	-56.3965			28.6	-107.544																							28.6	-138.672
	28.7	-18.9645			28.7	-219.116			28.8	-75.8057			28.7	-33.3862			28.7	-57.8003			28.7	-105.957																							28.7	-139.099
	28.8	-18.251			28.8	-221.68			28.9	-78.3081			28.8	-34.5459			28.8	-55.2978			28.8	-106.262																							28.8	-138.184
	28.9	-18.1145			28.9	-224.243			29	-73.3643			28.9	-32.4707			28.9	-57.373			28.9	-109.68																							28.9	-137.939
	29	-18.406			29	-225.525			29.1	-77.4536			29	-33.7524			29	-58.3496			29	-108.948																							29	-140.259
	29.1	-17.4037			29.1	-220.093			29.2	-77.6977			29.1	-34.2407			29.1	-57.7393			29.1	-108.643																							29.1	-138.489
	29.2	-18.229			29.2	-221.863			29.3	-76.0498			29.2	-33.8745			29.2	-58.3496			29.2	-109.131																							29.2	-139.16
	29.3	-17.8029			29.3	-224.365			29.4	-81.604			29.3	-32.5928			29.3	-57.8613			29.3	-107.971																							29.3	-138.184
	29.4	-18.5117			29.4	-223.633			29.5	-76.1108			29.4	-32.8369			29.4	-56.4575			29.4	-106.873																							29.4	-137.634
	29.5	-17.9117			29.5	-225.403			29.6	-79.2847			29.5	-34.8511			29.5	-57.251			29.5	-110.168																							29.5	-138.794
	29.6	-18.2548			29.6	-228.333			29.7	-75.0122			29.6	-34.8511			29.6	-58.8379			29.6	-108.704																							29.6	-138.428
	29.7	-18.5007			29.7	-224.609			29.8	-77.8198			29.7	-36.1328			29.7	-58.5327			29.7	-108.337																							29.7	-138.855
	29.8	-18.4891			29.8	-222.656			29.9	-74.2187			29.8	-34.4849			29.8	-58.0444			29.8	-110.718																							29.8	-139.709
	29.9	-18.4559			29.9	-222.412			30	-78.3081			29.9	-33.5083			29.9	-56.2744			29.9	-109.985																							29.9	-140.32
	30	-18.2675			30	-225.891			30.1	-79.895			30	-33.7524			30	-57.5561			30	-109.68																							30	-139.465
	30.1	-18.3025			30.1	-225.891			30.2	-78.6133			30.1	-33.3252			30.1	-59.3872			30.1	-109.863																							30.1	-138.794
	30.2	-17.7336			30.2	-223.755			30.3	-77.2705			30.2	-35.7056			30.2	-56.6406			30.2	-111.023																							30.2	-139.038
	30.3	-17.5838			30.3	-224.426			30.4	-79.956			30.3	-34.9121			30.3	-57.6782			30.3	-108.704																							30.3	-138.733
	30.4	-18.1009			30.4	-226.44			30.5	-78.186			30.4	-35.4614			30.4	-58.6548			30.4	-110.596																							30.4	-139.16
	30.5	-17.634			30.5	-229.126			30.6	-80.2002			30.5	-34.668			30.5	-56.8237			30.5	-110.229																							30.5	-138.672
	30.6	-17.7173			30.6	-221.619			30.7	-82.3364			30.6	-34.729			30.6	-57.373			30.6	-109.985																							30.6	-138.794
	30.7	-17.286			30.7	-226.379			30.8	-82.0923			30.7	-35.2783			30.7	-56.9458			30.7	-113.464																							30.7	-139.221
	30.8	-17.3265			30.8	-227.844			30.9	-82.0923			30.8	-35.7666			30.8	-58.2886			30.8	-109.314																							30.8	-138.184
	30.9	-18.2473			30.9	-229.37			31	-80.5054			30.9	-35.0952			30.9	-57.8003			30.9	-109.253																							30.9	-138.062
	31	-17.2028			31	-227.417			31.1	-79.0405			31	-36.0718			31	-57.0068			31	-111.572																							31	-137.817
	31.1	-16.5614			31.1	-230.591			31.2	-80.0171			31.1	-36.438			31.1	-57.373			31.1	-112.244																							31.1	-139.221
	31.2	-16.8596			31.2	-229.37			31.3	-82.0312			31.2	-37.7197			31.2	-59.021			31.2	-112.244																							31.2	-138.489
	31.3	-16.5987			31.3	-230.591			31.4	-81.2378			31.3	-36.3159			31.3	-57.9224			31.3	-112.976																							31.3	-139.404
	31.4	-16.6557			31.4	-226.562			31.5	-83.6792			31.4	-37.2925			31.4	-59.9976			31.4	-110.657																							31.4	-136.841
	31.5	-16.6434			31.5	-225.647			31.6	-80.7495			31.5	-35.8276			31.5	-57.8003			31.5	-112.061																							31.5	-138
	31.6	-16.5875			31.6	-227.783			31.7	-80.5054			31.6	-37.7808			31.6	-56.5796			31.6	-112.122																							31.6	-137.329
	31.7	-16.7048			31.7	-229.736			31.8	-81.7871			31.7	-35.9497			31.7	-57.9224			31.7	-112.793																							31.7	-138.672
	31.8	-15.835			31.8	-231.689			31.9	-81.8481			31.8	-37.4756			31.8	-56.2134			31.8	-112.61																							31.8	-140.076
	31.9	-15.3872			31.9	-230.835			32	-78.186			31.9	-37.4145			31.9	-58.1055			31.9	-112.122																							31.9	-138.428
	32	-14.8555			32	-229.37			32.1	-80.3223			32	-36.499			32	-56.2744			32	-113.342																							32	-138.306
	32.1	-15.329			32.1	-230.225			32.2	-75.7446			32.1	-37.5366			32.1	-55.2978			32.1	-113.831																							32.1	-137.878
	32.2	-14.7725			32.2	-232.483			32.3	-80.3833			32.2	-35.9497			32.2	-56.7627			32.2	-111.755																							32.2	-138.916
	32.3	-14.6508			32.3	-230.591			32.4	-81.543			32.3	-36.6821			32.3	-56.7627			32.3	-109.07																							32.3	-137.939
	32.4	-15.2674			32.4	-234.009			32.5	-80.9326			32.4	-37.2314			32.4	-55.481			32.4	-113.586																							32.4	-139.832
	32.5	-15.7261			32.5	-233.948			32.6	-79.956			32.5	-37.6587			32.5	-55.4199			32.5	-108.765																							32.5	-138.672
	32.6	-14.0605			32.6	-233.52			32.7	-83.374			32.6	-37.0483			32.6	-57.5561			32.6	-114.136																							32.6	-139.282
	32.7	-14.9798			32.7	-231.506			32.8	-84.2285			32.7	-36.438			32.7	-57.251			32.7	-111.938																							32.7	-137.756
	32.8	-14.4368			32.8	-231.018			32.9	-81.1157			32.8	-38.4521			32.8	-57.312			32.8	-113.647																							32.8	-137.207
	32.9	-13.5438			32.9	-236.999			33	-83.313			32.9	-36.5601			32.9	-57.4341			32.9	-112.793																							32.9	-139.221
	33	-13.1826			33	-230.408			33.1	-81.3599			33	-37.2925			33	-60.0586			33	-114.441																							33	-139.282
	33.1	-13.5607			33.1	-233.276			33.2	-82.0923			33.1	-38.4521			33.1	-57.9224			33.1	-113.342																							33.1	-137.695
	33.2	-13.2717			33.2	-230.469			33.3	-82.0312			33.2	-38.0859			33.2	-58.5937			33.2	-113.037																							33.2	-138
	33.3	-12.8399			33.3	-231.323			33.4	-83.313			33.3	-39.0015			33.3	-57.0068			33.3	-114.38																							33.3	-137.817
	33.4	-12.4761			33.4	-231.934			33.5	-83.4961			33.4	-37.2314			33.4	-59.2041			33.4	-113.647																							33.4	-138.916
	33.5	-12.6905			33.5	-232.788			33.6	-83.2519			33.5	-37.8418			33.5	-59.021			33.5	-112.976																							33.5	-139.404
	33.6	-12.9237			33.6	-235.657			33.7	-82.2143			33.6	-37.8418			33.6	-58.8379			33.6	-111.511																							33.6	-137.817
	33.7	-12.1028			33.7	-234.314			33.8	-83.313			33.7	-37.9639			33.7	-57.5561			33.7	-113.525																							33.7	-136.963
	33.8	-12.2984			33.8	-236.816			33.9	-81.1157			33.8	-37.5977			33.8	-58.2886			33.8	-114.685																							33.8	-138.733
	33.9	-12.4048			33.9	-236.45			34	-80.3833			33.9	-37.0483			33.9	-56.4575			33.9	-112.305																							33.9	-138.062
	34	-12.5007			34	-234.253			34.1	-81.665			34	-36.3769			34	-58.5937			34	-110.596																							34	-137.634
	34.1	-11.5754			34.1	-238.037			34.2	-85.5102			34.1	-37.4756			34.1	-57.7393			34.1	-110.107																							34.1	-138.489
	34.2	-11.7689			34.2	-233.337			34.3	-83.5571			34.2	-37.5366			34.2	-60.791			34.2	-110.657																							34.2	-138.611
	34.3	-11.6347			34.3	-232.727			34.4	-87.1582			34.3	-38.6353			34.3	-57.8613			34.3	-108.643																							34.3	-138.306
	34.4	-11.9485			34.4	-230.591			34.5	-83.313			34.4	-38.147			34.4	-58.6548			34.4	-107.361																							34.4	-138.55
	34.5	-11.583			34.5	-234.619			34.6	-83.8013			34.5	-38.6963			34.5	-60.0586			34.5	-109.436																							34.5	-139.893
	34.6	-11.2621			34.6	-234.985			34.7	-85.2661			34.6	-38.147			34.6	-60.6689			34.6	-108.582																							34.6	-138.733
	34.7	-10.5296			34.7	-234.741			34.8	-81.543			34.7	-37.6587			34.7	-67.0166			34.7	-110.413																							34.7	-136.475
	34.8	-11.3265			34.8	-231.445			34.9	-88.1348			34.8	-38.4521			34.8	-66.5283			34.8	-110.718																							34.8	-135.864
	34.9	-10.6164			34.9	-233.52			35	-85.6934			34.9	-38.3301			34.9	-61.2183			34.9	-110.046																							34.9	-138.367
	35	-10.5992			35	-237.244			35.1	-80.9936			35	-38.4521			35	-54.9927			35	-110.046																							35	-138.062
	35.1	-10.4294			35.1	-233.337			35.2	-86.9141			35.1	-37.6587			35.1	-56.7627			35.1	-109.009																							35.1	-137.756
	35.2	-10.613			35.2	-232.666			35.3	-81.604			35.2	-38.147			35.2	-53.6499			35.2	-108.215																							35.2	-135.071
	35.3	-9.88877			35.3	-238.098			35.4	-86.6089			35.3	-39.0625			35.3	-57.6782			35.3	-111.389																							35.3	-136.597
	35.4	-10.5092			35.4	-233.215			35.5	-91.0644			35.4	-39.6118			35.4	-67.1387			35.4	-109.009																							35.4	-136.963
	35.5	-9.97251			35.5	-237.915			35.6	-84.7778			35.5	-39.3066			35.5	-52.2461			35.5	-110.718																							35.5	-137.939
	35.6	-10.2433			35.6	-238.098			35.7	-83.6792			35.6	-37.5977			35.6	-60.9741			35.6	-112.061																							35.6	-137.39
	35.7	-9.30285			35.7	-238.464			35.8	-84.5947			35.7	-37.8418			35.7	-68.3594			35.7	-110.657																							35.7	-137.085
	35.8	-9.19873			35.8	-237.366			35.9	-84.2895			35.8	-39.3677			35.8	-77.1484			35.8	-111.755																							35.8	-137.634
	35.9	-9.65032			35.9	-237.854			36	-81.2378			35.9	-38.7573			35.9	-77.8809			35.9	-108.948																							35.9	-137.756
	36	-9.21749			36	-243.164			36.1	-91.0034			36	-38.7573			36	-63.9648			36	-110.779																							36	-136.536
	36.1	-9.56842			36.1	-240.173			36.2	-83.5571			36.1	-38.8794			36.1	-66.7725			36.1	-112.244																							36.1	-138.55
	36.2	-9.49408			36.2	-240.601			36.3	-85.144			36.2	-37.4145			36.2	-60.1807			36.2	-113.037																							36.2	-138.55
	36.3	-9.12397			36.3	-242.859			36.4	-85.9985			36.3	-37.4145			36.3	-62.1338			36.3	-110.596																							36.3	-138.245
	36.4	-8.41826			36.4	-239.136			36.5	-86.9141			36.4	-38.6963			36.4	-56.5796			36.4	-113.159																							36.4	-137.756
	36.5	-8.86192			36.5	-244.568			36.6	-87.5854			36.5	-38.8184			36.5	-59.021			36.5	-109.497																							36.5	-137.207
	36.6	-9.08992			36.6	-244.568			36.7	-81.9702			36.6	-36.7432			36.6	-66.5283			36.6	-110.657																							36.6	-137.39
	36.7	-8.47642			36.7	-242.554			36.8	-88.6841			36.7	-38.269			36.7	24.4751			36.7	-111.572																							36.7	-138.123
	36.8	-8.3327			36.8	-242.859			36.9	-89.2334			36.8	-39.3066			36.8	-62.9883			36.8	-110.596																							36.8	-136.658
	36.9	-8.64904			36.9	-239.014			37	-89.2334			36.9	-38.0859			36.9	-71.7773			36.9	-110.474																							36.9	-137.146
	37	-8.5064			37	-240.845			37.1	-85.9985			37	-37.2925			37	-91.8579			37	-110.901																							37	-136.597
	37.1	-8.35322			37.1	-243.958			37.2	-82.6416			37.1	-37.5366			37.1	-145.752			37.1	-106.995																							37.1	-138.428
	37.2	-8.33332			37.2	-241.272			37.3	-86.6089			37.2	-39.0015			37.2	-291.687			37.2	-108.826																							37.2	-137.207
	37.3	-8.4003			37.3	-241.516			37.4	-85.7544			37.3	-37.5366			37.3	-52.5513			37.3	-110.535																							37.3	-137.512
	37.4	-7.90955			37.4	-241.272			37.5	-86.4258			37.4	-37.7808			37.4	51.2085			37.4	-108.948																							37.4	-137.39
	37.5	-8.29163			37.5	-243.164			37.6	-87.7075			37.5	-38.4521			37.5	1.89209			37.5	-110.779																							37.5	-136.414
	37.6	-8.46071			37.6	-247.559			37.7	-88.2568			37.6	-39.6728			37.6	-31.311			37.6	-108.765																							37.6	-135.132
	37.7	-7.65958			37.7	-240.173			37.8	-87.2192			37.7	-38.8794			37.7	-51.4526			37.7	-111.572																							37.7	-136.108
	37.8	-8.32808			37.8	-237.915			37.9	-86.6089			37.8	-38.3911			37.8	-53.9551			37.8	-110.901																							37.8	-136.78
	37.9	-8.15602			37.9	-244.873			38	-89.3555			37.9	-39.1235			37.9	-58.7158			37.9	-107.971																							37.9	-136.169
	38	-7.91921			38	-245.178			38.1	-91.3696			38	-40.4663			38	-58.2275			38	-110.474																							38	-136.963
	38.1	-7.73892			38.1	-247.62			38.2	-90.0879			38.1	-39.4287			38.1	-57.1899			38.1	-111.694																							38.1	-137.451
	38.2	-8.01307			38.2	-245.117			38.3	-92.7124			38.2	-38.5742			38.2	-54.1992			38.2	-109.07																							38.2	-137.329
	38.3	-7.22028			38.3	-251.099			38.4	-93.2007			38.3	-39.2456			38.3	-53.5278			38.3	-109.375																							38.3	-138.367
	38.4	-7.8847			38.4	-246.582			38.5	-94.9707			38.4	-38.9404			38.4	-44.7388			38.4	-108.826																							38.4	-138.489
	38.5	-7.50188			38.5	-240.723			38.6	-91.6138			38.5	-40.7104			38.5	-30.8838			38.5	-106.445																							38.5	-137.39
	38.6	-7.65848			38.6	-249.329			38.7	-92.5903			38.6	-39.1235			38.6	-17.7002			38.6	-109.375																							38.6	-136.963
	38.7	-7.45011			38.7	-246.582			38.8	-89.2944			38.7	-39.4287			38.7	-11.2305			38.7	-108.887																							38.7	-135.986
	38.8	-7.21028			38.8	-248.535			38.9	-90.9424			38.8	-38.4521			38.8	-8.23975			38.8	-110.779																							38.8	-138.123
	38.9	-6.91492			38.9	-245.85			39	-92.8955			38.9	-40.2222			38.9	-7.62939			38.9	-111.389																							38.9	-138.733
	39	-7.60794			39	-248.23			39.1	-93.2007			39	-39.3677			39	-6.40869			39	-110.535																							39	-137.939
	39.1	-6.6686			39.1	-247.131			39.2	-91.8579			39.1	-39.3677			39.1	-6.22559			39.1	-109.863																							39.1	-135.864
	39.2	-7.60636			39.2	-248.779			39.3	-91.4307			39.2	-39.7339			39.2	-5.98144			39.2	-109.68																							39.2	-137.451
	39.3	-7.03634			39.3	-248.84			39.4	-91.0644			39.3	-39.0625			39.3	-6.28662			39.3	-109.009																							39.3	-137.939
	39.4	-6.87914			39.4	-242.554			39.5	-90.5762			39.4	-40.8936			39.4	-6.53076			39.4	-109.375																							39.4	-138.062
	39.5	-7.1275			39.5	-248.352			39.6	-90.1489			39.5	-40.1001			39.5	-5.92041			39.5	-110.84																							39.5	-135.681
	39.6	-7.20387			39.6	-246.765			39.7	-91.3696			39.6	-40.4053			39.6	-7.8125			39.6	-110.291																							39.6	-136.78
	39.7	-6.84479			39.7	-247.009			39.8	-89.3555			39.7	-42.1143			39.7	-5.79834			39.7	-108.398																							39.7	-136.23
	39.8	-7.4248			39.8	-244.385			39.9	-91.4307			39.8	-40.6494			39.8	-6.34766			39.8	-108.276																							39.8	-136.719
	39.9	-6.38858			39.9	-250.183			40	-87.4634			39.9	-38.9404			39.9	-5.61523			39.9	-108.459																							39.9	-137.573
	40	-7.52761			40	-251.221			40.1	-91.1255			40	-40.8936			40	-6.16455			40	-108.398																							40	-137.207
	40.1	-6.84017			40.1	-250.61			40.2	-89.5996			40.1	-40.5273			40.1	-6.16455			40.1	-109.192																							40.1	-136.658
	40.2	-6.86569			40.2	-248.779			40.3	-93.2617			40.2	-41.0156			40.2	-6.40869			40.2	-109.436																							40.2	-137.634
	40.3	-6.48278			40.3	-247.62			40.4	-89.0503			40.3	-40.7715			40.3	-6.89697			40.3	-108.276																							40.3	-137.207
	40.4	-6.38595			40.4	-248.169			40.5	-93.2007			40.4	-41.3818			40.4	-7.14111			40.4	-108.154																							40.4	-135.62
	40.5	-6.26831			40.5	-249.329			40.6	-91.4917			40.5	-40.2832			40.5	-7.26318			40.5	-110.046																							40.5	-135.315
	40.6	-6.70385			40.6	-249.207			40.7	-91.0644			40.6	-40.6494			40.6	-7.32422			40.6	-105.835																							40.6	-136.902
	40.7	-6.52329			40.7	-252.563			40.8	-93.689			40.7	-41.687			40.7	-5.18799			40.7	-109.07																							40.7	-136.475
	40.8	-7.03258			40.8	-252.624			40.9	-91.1865			40.8	-41.9922			40.8	-8.30078			40.8	-107.849																							40.8	-136.963
	40.9	-6.50855			40.9	-249.573			41	-94.0552			40.9	-42.6636			40.9	-7.50732			40.9	-108.643																							40.9	-135.925
	41	-6.60681			41	-246.338			41.1	-92.8345			41	-42.4194			41	-7.62939			41	-108.643																							41	-136.414
	41.1	-6.14536			41.1	-251.892			41.2	-93.5059			41.1	-42.2974			41.1	-8.05664			41.1	-110.168																							41.1	-135.193
	41.2	-6.59654			41.2	-256.165			41.3	-93.75			41.2	-40.8936			41.2	-7.20215			41.2	-110.962																							41.2	-134.949
	41.3	-6.19983			41.3	-252.869			41.4	-90.9424			41.3	-40.6494			41.3	-6.34766			41.3	-108.215																							41.3	-137.268
	41.4	-6.0294			41.4	-253.479			41.5	-94.9707			41.4	-41.5039			41.4	-7.44629			41.4	-107.849																							41.4	-135.437
	41.5	-6.85749			41.5	-252.563			41.6	-90.8813			41.5	-41.9922			41.5	-6.83594			41.5	-110.535																							41.5	-135.559
	41.6	-6.55096			41.6	-248.84			41.7	-92.8345			41.6	-41.2598			41.6	-7.44629			41.6	-110.962																							41.6	-137.207
	41.7	-5.86231			41.7	-248.352			41.8	-89.1113			41.7	-41.3818			41.7	-7.14111			41.7	-110.474																							41.7	-137.085
	41.8	-6.41265			41.8	-255.554			41.9	-91.1255			41.8	-41.9311			41.8	-7.69043			41.8	-110.596																							41.8	-135.01
	41.9	-6.46573			41.9	-249.512			42	-91.7969			41.9	-41.748			41.9	-6.89697			41.9	-110.291																							41.9	-134.827
	42	-5.9101			42	-253.418			42.1	-92.4072			42	-41.1377			42	-7.75146			42	-108.154																							42	-136.963
	42.1	-6.45281			42.1	-254.517			42.2	-91.4307			42.1	-41.626			42.1	-8.36182			42.1	-110.291																							42.1	-138.367
	42.2	-6.14592			42.2	-254.089			42.3	-91.4917			42.2	-41.4429			42.2	-8.36182			42.2	-105.469																							42.2	-136.902
	42.3	-6.18776			42.3	-255.92			42.4	-90.4541			42.3	-43.335			42.3	-8.23975			42.3	-106.75																							42.3	-138.794
	42.4	-5.86533			42.4	-252.563			42.5	-88.8061			42.4	-40.7715			42.4	-6.7749			42.4	-106.75																							42.4	-138.489
	42.5	-6.14992			42.5	-253.296			42.6	-91.5527			42.5	-42.1143			42.5	-7.14111			42.5	-108.948																							42.5	-138.55
	42.6	-5.94344			42.6	-257.69			42.7	-88.2568			42.6	-42.1753			42.6	-7.8125			42.6	-109.741																							42.6	-136.841
	42.7	-5.50722			42.7	-250.916			42.8	-90.1489			42.7	-42.9687			42.7	-7.62939			42.7	-107.971																							42.7	-138.977
	42.8	-6.27436			42.8	-253.357			42.9	-89.9658			42.8	-42.8467			42.8	-7.38525			42.8	-106.873																							42.8	-136.963
	42.9	-5.52672			42.9	-260.071			43	-92.4072			42.9	-42.2974			42.9	-8.60596			42.9	-111.023																							42.9	-137.024
	43	-6.13143			43	-251.343			43.1	-95.459			43	-42.4805			43	-8.78906			43	-110.291																							43	-138.428
	43.1	-6.19889			43.1	-256.226			43.2	-97.29			43.1	-41.8091			43.1	-7.44629			43.1	-109.009																							43.1	-135.986
	43.2	-6.11012			43.2	-256.653			43.3	-91.6748			43.2	-42.1143			43.2	-7.93457			43.2	-109.863																							43.2	-136.78
	43.3	-5.74414			43.3	-252.075			43.4	-94.2383			43.3	-40.9546			43.3	-7.50732			43.3	-107.91																							43.3	-138.428
	43.4	-5.71689			43.4	-256.836			43.5	-92.8345			43.4	-42.5415			43.4	-7.20215			43.4	-108.765																							43.4	-138.062
	43.5	-6.16683			43.5	-258.301			43.6	-95.6421			43.5	-42.6636			43.5	-6.40869			43.5	-109.68																							43.5	-138.184
	43.6	-5.77774			43.6	-259.033			43.7	-98.1445			43.6	-41.626			43.6	-6.95801			43.6	-109.863																							43.6	-138.428
	43.7	-5.88961			43.7	-256.531			43.8	-99.4873			43.7	-41.626			43.7	-6.95801			43.7	-108.826																							43.7	-138.123
	43.8	-5.6252			43.8	-259.216			43.9	-98.3887			43.8	-41.3818			43.8	-6.71387			43.8	-109.07																							43.8	-136.78
	43.9	-5.61613			43.9	-256.165			44	-98.0835			43.9	-40.5884			43.9	-6.71387			43.9	-108.521																							43.9	-137.329
	44	-5.13293			44	-260.437			44.1	-99.3042			44	-41.8701			44	-7.01904			44	-106.628																							44	-138.672
	44.1	-5.14163			44.1	-255.737			44.2	-98.0835			44.1	-42.4194			44.1	-8.17871			44.1	-107.849																							44.1	-139.038
	44.2	-5.74354			44.2	-261.169			44.3	-97.9614			44.2	-41.748			44.2	-8.23975			44.2	-109.009																							44.2	-138.367
	44.3	-5.88884			44.3	-259.094			44.4	-97.29			44.3	-42.0532			44.3	-7.93457			44.3	-109.009																							44.3	-137.939
	44.4	-5.86906			44.4	-256.897			44.5	-99.2432			44.4	-43.8843							44.4	-109.07																							44.4	-139.404
	44.5	-5.65576			44.5	-260.62			44.6	-95.2148			44.5	-43.2129							44.5	-109.192																							44.5	-142.639
	44.6	-5.36577			44.6	-257.385			44.7	-102.356			44.6	-43.0908							44.6	-108.521																							44.6	-138.916
	44.7	-5.36069			44.7	-258.24			44.8	-94.2993			44.7	-42.9687							44.7	-110.718																							44.7	-140.747
	44.8	-5.5422			44.8	-261.78			44.9	-99.7314			44.8	-41.9311							44.8	-109.802																							44.8	-137.207
	44.9	-4.96951			44.9	-254.517			45	-98.2666			44.9	-43.8232							44.9	-109.131																							44.9	-140.564
	45	-5.33851			45	-260.742			45.1	-97.7783			45	-41.9922							45	-108.337																							45	-136.719
	45.1	-5.31971			45.1	-257.385			45.2	-101.074			45.1	-42.6025							45.1	-111.45																							45.1	-133.545
	45.2	-5.3283			45.2	-264.221			45.3	-96.9849			45.2	-43.5791							45.2	-111.633																							45.2	-139.404
	45.3	-5.453			45.3	-262.573			45.4	-101.196			45.3	-44.5557							45.3	-110.046																							45.3	-135.681
					45.4	-267.395			45.5	-98.1445			45.4	-42.7856							45.4	-112																							45.4	-138.733
					45.5	-266.663			45.6	-100.098			45.5	-43.6401							45.5	-113.159																							45.5	-138.855
					45.6	-266.357			45.7	-96.2524			45.6	-42.6636							45.6	-111.45																							45.6	-139.648
					45.7	-264.526			45.8	-99.8535			45.7	-44.3726							45.7	-111.877																							45.7	-142.212
					45.8	-265.442			45.9	-102.783			45.8	-43.9453							45.8	-110.352																							45.8	-141.907
					45.9	-257.507			46	-98.4497			45.9	-43.8843							45.9	-109.68																							45.9	-142.212
					46	-263.489			46.1	-98.8159			46	-44.0674							46	-110.413																							46	-142.517
					46.1	-266.235			46.2	-99.9756			46.1	-44.1894							46.1	-110.535																							46.1	-142.7
					46.2	-266.602			46.3	-96.2524			46.2	-44.7998							46.2	-111.145																							46.2	-141.663
					46.3	-266.479			46.4	-100.586			46.3	-42.8467							46.3	-110.352																							46.3	-141.602
					46.4	-264.465			46.5	-100.159			46.4	-42.4194							46.4	-109.863																							46.4	-142.09
					46.5	-261.78			46.6	-97.4731			46.5	-44.6777							46.5	-109.07																							46.5	-142.639
					46.6	-263.733			46.7	-99.7314			46.6	-44.1284							46.6	-109.924																							46.6	-145.264
					46.7	-266.418			46.8	-97.9614			46.7	-44.4336							46.7	-110.474																							46.7	-141.785
					46.8	-264.038			46.9	-98.6938			46.8	-42.7856							46.8	-110.84																							46.8	-141.113
					46.9	-264.465			47	-96.0693			46.9	-42.8467							46.9	-109.802																							46.9	-142.7
					47	-263.367			47.1	-96.6186			47	-44.5557							47	-110.779																							47	-142.639
					47.1	-264.648			47.2	-101.135			47.1	-44.8608							47.1	-108.704																							47.1	-143.982
					47.2	-255.554			47.3	-99.4263			47.2	-45.2881							47.2	-109.009																							47.2	-143.677
					47.3	-267.517			47.4	-99.0601			47.3	-46.2646							47.3	-110.229																							47.3	-142.395
					47.4	-262.756			47.5	-98.3887			47.4	-45.6543							47.4	-110.84																							47.4	-143.372
					47.5	-268.86			47.6	-94.5434			47.5	-45.3491							47.5	-109.741																							47.5	-143.921
					47.6	-261.353			47.7	-98.5107			47.6	-44.0674							47.6	-111.633																							47.6	-140.93
					47.7	-269.47			47.8	-98.8159			47.7	-47.0581							47.7	-110.596																							47.7	-141.968
					47.8	-265.076			47.9	-98.8159			47.8	-44.4946							47.8	-111.45																							47.8	-143.738
					47.9	-261.963			48	-101.074			47.9	-45.4712							47.9	-109.741																							47.9	-142.578
					48	-260.925			48.1	-96.7407			48	-44.1284							48	-110.413																							48	-144.104
					48.1	-252.93			48.2	-95.8862			48.1	-46.0815							48.1	-110.474																							48.1	-144.226
					48.2	-261.414			48.3	-98.6938			48.2	-44.9219							48.2	-109.619																							48.2	-144.287
					48.3	-260.986			48.4	-98.999			48.3	-43.8843							48.3	-108.826																							48.3	-144.775
					48.4	-263.611			48.5	-93.2617			48.4	-45.6543							48.4	-112.549																							48.4	-145.569
					48.5	-262.451			48.6	-98.3887			48.5	-43.7622							48.5	-110.596																							48.5	-146.851
					48.6	-260.376			48.7	-100.769			48.6	-44.4946							48.6	-109.436																							48.6	-144.714
					48.7	-258.972			48.8	-99.8535			48.7	-46.5698							48.7	-111.084																							48.7	-143.494
					48.8	-263.977			48.9	-100.891			48.8	-43.9453							48.8	-112																							48.8	-146.484
					48.9	-262.207			49	-94.2993			48.9	-44.2505							48.9	-109.68																							48.9	-145.691
					49	-260.498			49.1	-95.9473			49	-46.6309							49	-111.389																							49	-144.897
					49.1	-259.705			49.2	-97.0459			49.1	-45.105							49.1	-109.985																							49.1	-144.226
					49.2	-257.507			49.3	-99.3652			49.2	-45.8374							49.2	-112.061																							49.2	-145.02
					49.3	-260.681			49.4	-99.3042			49.3	-46.936							49.3	-110.901																							49.3	-145.996
					49.4	-261.902			49.5	-98.0835			49.4	-45.8984							49.4	-108.337																							49.4	-146.606
					49.5	-262.268			49.6	-95.52			49.5	-44.6167							49.5	-111.023																							49.5	-144.653
					49.6	-262.024			49.7	-99.9756			49.6	-46.0205							49.6	-109.375																							49.6	-145.02
					49.7	-264.038			49.8	-100.403			49.7	-46.0205							49.7	-111.206																							49.7	-145.874
					49.8	-266.602			49.9	-97.7783			49.8	-44.4336							49.8	-111.694																							49.8	-145.813
					49.9	-266.052			50	-98.938			49.9	-44.3726							49.9	-111.389																							49.9	-146.973
					50	-264.893			50.1	-101.074			50	-45.0439							50	-109.192																							50	-147.034
					50.1	-263.916			50.2	-98.6328			50.1	-45.105							50.1	-112.793																							50.1	-145.691
					50.2	-264.404			50.3	-101.562			50.2	-45.4712							50.2	-112.305																							50.2	-145.996
					50.3	-264.282			50.4	-96.0083			50.3	-46.3257							50.3	-108.826																							50.3	-144.836
					50.4	-265.137			50.5	-96.9849			50.4	-47.4853							50.4	-112.183																							50.4	-145.63
					50.5	-268.311			50.6	-98.1445			50.5	-44.7388							50.5	-108.765																							50.5	-147.766
					50.6	-265.869			50.7	-96.2524			50.6	-44.3726							50.6	-113.098																							50.6	-145.081
					50.7	-265.137			50.8	-97.7173			50.7	-45.5933							50.7	-110.596																							50.7	-145.142
					50.8	-264.648			50.9	-96.0083			50.8	-46.1426							50.8	-111.084																							50.8	-145.874
					50.9	-263.489			51	-99.1821			50.9	-46.3257							50.9	-112.061																							50.9	-146.179
					51	-271.79			51.1	-97.168			51	-46.6309							51	-112.244																							51	-144.714
					51.1	-264.832			51.2	-95.7642			51.1	-45.7153							51.1	-112.183																							51.1	-144.165
					51.2	-263.428			51.3	-96.0693			51.2	-47.0581							51.2	-111.755																							51.2	-145.874
					51.3	-269.165			51.4	-99.1211			51.3	-46.814							51.3	-110.229																							51.3	-145.02
					51.4	-270.996			51.5	-95.0317			51.4	-44.9219							51.4	-111.572																							51.4	-146.667
					51.5	-264.587			51.6	-92.7124			51.5	-46.3257							51.5	-112.793																							51.5	-143.249
					51.6	-263.306			51.7	-92.5293			51.6	-47.1802							51.6	-109.009																							51.6	-145.325
					51.7	-262.024			51.8	-95.7031			51.7	-47.1191							51.7	-111.877																							51.7	-145.386
					51.8	-265.076			51.9	-94.1772			51.8	-44.6777							51.8	-112.793																							51.8	-145.081
					51.9	-265.198			52	-92.4683			51.9	-46.3867							51.9	-108.521																							51.9	-145.508
					52	-264.648			52.1	-94.8486			52	-45.6543							52	-110.779																							52	-145.996
					52.1	-268.188			52.2	-94.8486			52.1	-46.5088							52.1	-110.413																							52.1	-144.348
					52.2	-264.16			52.3	-96.4966			52.2	-45.3491							52.2	-109.68																							52.2	-145.63
					52.3	-267.334			52.4	-98.5718			52.3	-46.875							52.3	-110.107																							52.3	-145.752
					52.4	-264.282			52.5	-94.3603			52.4	-44.0674							52.4	-111.267																							52.4	-145.63
					52.5	-269.958			52.6	-99.6094			52.5	-43.2739							52.5	-110.413																							52.5	-147.522
					52.6	-262.695			52.7	-95.3979			52.6	-46.0205							52.6	-108.826																							52.6	-145.996
					52.7	-264.282			52.8	-97.1069			52.7	-48.0957							52.7	-110.352																							52.7	-146.24
					52.8	-266.296			52.9	-93.2007			52.8	-48.0957							52.8	-111.023																							52.8	-148.254
					52.9	-269.836			53	-93.3838			52.9	-44.7998							52.9	-112.488																							52.9	-147.644
					53	-270.691			53.1	-95.7031			53	-45.6543							53	-112.976																							53	-148.01
					53.1	-275.879			53.2	-96.7407			53.1	-47.7295							53.1	-111.694																							53.1	-146.973
					53.2	-275.024			53.3	-94.1162			53.2	-48.4009							53.2	-111.633																							53.2	-147.095
					53.3	-275.513			53.4	-94.9707			53.3	-46.7529							53.3	-111.389																							53.3	-147.522
					53.4	-268.677			53.5	-98.6938			53.4	-46.5698							53.4	-109.985																							53.4	-145.752
					53.5	-266.602			53.6	-95.581			53.5	-46.0205							53.5	-112.61																							53.5	-147.705
					53.6	-272.217			53.7	-95.9473			53.6	-46.0815							53.6	-109.558																							53.6	-146.179
					53.7	-268.127			53.8	-95.1538			53.7	-46.2036							53.7	-110.291																							53.7	-147.461
					53.8	-271.728			53.9	-98.3887			53.8	-47.0581							53.8	-106.201																							53.8	-146.545
					53.9	-268.921			54	-97.4121			53.9	-46.936							53.9	-110.168																							53.9	-147.705
					54	-271.728			54.1	-95.8862			54	-45.166							54	-107.483																							54	-146.484
					54.1	-272.156			54.2	-95.6421			54.1	-46.1426							54.1	-113.464																							54.1	-147.644
					54.2	-263.489			54.3	-97.229			54.2	-47.6685							54.2	-113.831																							54.2	-147.522
					54.3	-271.851			54.4	-97.6562			54.3	-46.9971							54.3	-109.253																							54.3	-148.254
					54.4	-275.33			54.5	-98.3276			54.4	-47.7905							54.4	-110.901																							54.4	-147.034
					54.5	-274.231			54.6	-90.4541			54.5	-46.0815							54.5	-109.558																							54.5	-147.4
					54.6	-272.766			54.7	-94.0552			54.6	-45.6543							54.6	-112.671																							54.6	-146.057
					54.7	-271.484			54.8	-94.6655			54.7	-46.3257							54.7	-112.122																							54.7	-147.522
					54.8	-275.391			54.9	-99.7314			54.8	-43.5181							54.8	-112.671																							54.8	-146.912
					54.9	-274.658			55	-94.6655			54.9	-47.6685							54.9	-109.802																							54.9	-146.362
					55	-272.522			55.1	-93.6279			55	-46.3257							55	-112.976																							55	-147.095
					55.1	-273.315			55.2	-96.5576			55.1	-46.5698							55.1	-110.718																							55.1	-147.827
					55.2	-270.935			55.3	-89.3555			55.2	-44.6777							55.2	-109.192																							55.2	-147.644
					55.3	-268.921			55.4	-92.9565			55.3	-46.936							55.3	-109.863																							55.3	-147.4
					55.4	-269.714			55.5	-96.6186			55.4	-47.7295							55.4	-112.549																							55.4	-146.301
					55.5	-279.175			55.6	-91.7358			55.5	-48.4009							55.5	-107.727																							55.5	-147.095
					55.6	-274.719			55.7	-91.0644			55.6	-48.5229							55.6	-109.619																							55.6	-147.522
					55.7	-274.963			55.8	-92.2241			55.7	-46.3257							55.7	-112.305																							55.7	-147.156
					55.8	-276.55			55.9	-91.98			55.8	-44.7388							55.8	-113.22																							55.8	-145.325
					55.9	-274.719			56	-90.271			55.9	-46.875							55.9	-112.793																							55.9	-146.667
					56	-271.362			56.1	-91.6748			56	-48.4009							56	-110.901																							56	-149.17
					56.1	-276.794			56.2	-90.7593			56.1	-46.814							56.1	-109.924																							56.1	-148.071
					56.2	-273.987			56.3	-93.6279			56.2	-45.3491							56.2	-110.84																							56.2	-150.33
					56.3	-270.264			56.4	-90.7593			56.3	-47.6074							56.3	-110.046																							56.3	-150.452
					56.4	-270.752			56.5	-88.8061			56.4	-46.3867							56.4	-109.253																							56.4	-148.56
					56.5	-274.048			56.6	-92.102			56.5	-48.5229							56.5	-111.45																							56.5	-149.231
					56.6	-275.024			56.7	-94.1162			56.6	-47.7295							56.6	-111.633																							56.6	-148.376
					56.7	-274.902			56.8	-90.9424			56.7	-47.1191							56.7	-110.901																							56.7	-149.597
					56.8	-271.728			56.9	-90.4541			56.8	-46.6309							56.8	-110.413																							56.8	-150.208
					56.9	-278.076			57	-88.7451			56.9	-47.1802							56.9	-110.84																							56.9	-149.841
					57	-273.743			57.1	-94.1162			57	-46.6309							57	-111.511																							57	-148.56
					57.1	-272.949			57.2	-91.6748			57.1	-47.9126							57.1	-109.619																							57.1	-147.644
					57.2	-272.766			57.3	-95.459			57.2	-46.5698							57.2	-111.389																							57.2	-151.062
					57.3	-274.597			57.4	-95.2148			57.3	-46.3867							57.3	-109.924																							57.3	-150.024
					57.4	-278.259			57.5	-84.7778			57.4	-45.7153							57.4	-109.436																							57.4	-147.827
					57.5	-271.545			57.6	-92.3462			57.5	-46.5088							57.5	-110.779																							57.5	-148.987
					57.6	-277.161			57.7	-94.5434			57.6	-47.4853							57.6	-113.708																							57.6	-147.705
					57.7	-278.015			57.8	-92.9565			57.7	-46.2646							57.7	-111.755																							57.7	-148.804
					57.8	-280.823			57.9	-88.3789			57.8	-45.105							57.8	-110.718																							57.8	-152.954
					57.9	-275.207			58	-88.9893			57.9	-47.6074							57.9	-109.07																							57.9	-151.306
					58	-273.682			58.1	-85.144			58	-46.5088							58	-111.938																							58	-153.381
					58.1	-276.001			58.2	-91.0644			58.1	-45.3491							58.1	-108.948																							58.1	-150.208
					58.2	-268.249			58.3	-85.8765			58.2	-47.8516							58.2	-109.558																							58.2	-150.208
					58.3	-272.644			58.4	-92.8955			58.3	-45.5322							58.3	-108.337																							58.3	-150.146
					58.4	-274.902			58.5	-88.3789			58.4	-46.936							58.4	-110.168																							58.4	-151.367
					58.5	-273.987			58.6	-85.083			58.5	-46.5698							58.5	-110.474																							58.5	-150.391
					58.6	-274.536			58.7	-87.8906			58.6	-46.9971							58.6	-113.77																							58.6	-154.358
					58.7	-274.902			58.8	-93.0176			58.7	-46.5088							58.7	-109.741																							58.7	-153.809
					58.8	-277.832			58.9	-90.21			58.8	-44.9829							58.8	-109.253																							58.8	-152.405
					58.9	-277.344			59	-87.2192			58.9	-46.814							58.9	-113.77																							58.9	-151.306
					59	-280.273			59.1	-90.1489			59	-47.2412							59	-111.755																							59	-151.306
					59.1	-280.212			59.2	-89.9658			59.1	-46.9971							59.1	-109.924																							59.1	-152.283
					59.2	-272.217			59.3	-87.3413			59.2	-46.6309							59.2	-110.413																							59.2	-151.794
					59.3	-277.527			59.4	-89.0503			59.3	-47.7905							59.3	-110.657																							59.3	-151.245
					59.4	-288.513			59.5	-85.6323			59.4	-47.7295							59.4	-112																							59.4	-148.743
					59.5	-281.494			59.6	-90.9424			59.5	-47.6074							59.5	-110.718																							59.5	-149.17
					59.6	-271.423			59.7	-89.9658			59.6	-47.6685							59.6	-111.145																							59.6	-150.085
					59.7	-279.236			59.8	-88.4399			59.7	-48.0347							59.7	-107.666																							59.7	-151.55
					59.8	-279.297			59.9	-85.4492			59.8	-46.3867							59.8	-110.046																							59.8	-150.146
					59.9	-279.297			60	-86.7309			59.9	-45.9595							59.9	-106.934																							59.9	-150.208
					60	-276.916			60.1	-87.0972			60	-46.7529							60	-109.619																							60	-149.109
					60.1	-278.87			60.2	-90.6982			60.1	-44.3115							60.1	-110.84																							60.1	-150.452
					60.2	-276.245			60.3	-86.6089			60.2	-46.0815							60.2	-109.558																							60.2	-151.001
					60.3	-278.503			60.4	-87.0972			60.3	-47.3022							60.3	-109.375																							60.3	-149.902
					60.4	-272.705			60.5	-87.5854			60.4	-48.1567							60.4	-111.877																							60.4	-147.583
					60.5	-278.503			60.6	-84.1675			60.5	-45.105							60.5	-113.037																							60.5	-149.414
					60.6	-274.658			60.7	-85.9375			60.6	-45.5933							60.6	-114.807																							60.6	-148.926
					60.7	-275.024			60.8	-83.6182			60.7	-45.6543							60.7	-112.915																							60.7	-148.499
					60.8	-277.466			60.9	-86.1206			60.8	-47.3633							60.8	-107.544																							60.8	-147.583
					60.9	-273.376			61	-83.5571			60.9	-47.3022							60.9	-111.45																							60.9	-148.621
					61	-280.151			61.1	-82.6416			61	-46.3867							61	-110.168																							61	-148.071
					61.1	-280.029			61.2	-88.3789			61.1	-46.0205							61.1	-109.924																							61.1	-149.292
					61.2	-275.757			61.3	-83.7402			61.2	-45.7764							61.2	-105.347																							61.2	-147.583
					61.3	-279.48			61.4	-84.2895			61.3	-45.6543							61.3	-108.459																							61.3	-147.644
					61.4	-281.555			61.5	-80.7495			61.4	-47.6685							61.4	-109.863																							61.4	-145.874
					61.5	-277.283			61.6	-86.5478			61.5	-45.0439							61.5	-108.093																							61.5	-146.545
					61.6	-279.48			61.7	-86.6699			61.6	-45.9595							61.6	-107.483																							61.6	-148.682
					61.7	-280.09			61.8	-84.8389			61.7	-46.6309							61.7	-111.877																							61.7	-149.109
					61.8	-278.809			61.9	-84.1675			61.8	-46.1426							61.8	-110.779																							61.8	-148.499
					61.9	-276.672			62	-84.8389			61.9	-44.9829							61.9	-105.286																							61.9	-146.729
					62	-282.532			62.1	-83.6182			62	-46.0205							62	-110.901																							62	-146.301
					62.1	-284.546			62.2	-80.7495			62.1	-47.1802							62.1	-107.056																							62.1	-150.757
					62.2	-275.391			62.3	-82.3364			62.2	-44.9829							62.2	-97.6562																							62.2	-148.987
					62.3	-278.381			62.4	-85.5713			62.3	-46.875							62.3	-107.544																							62.3	-146.851
					62.4	-287.781			62.5	-82.9468			62.4	-45.8374							62.4	-105.225																							62.4	-148.499
					62.5	-277.954			62.6	-83.8013			62.5	-48.0957							62.5	-109.131																							62.5	-149.109
					62.6	-283.813			62.7	-85.083			62.6	-46.0205							62.6	-108.032																							62.6	-147.705
					62.7	-280.151			62.8	-82.6416			62.7	-46.2646							62.7	-107.483																							62.7	-147.888
					62.8	-283.997			62.9	-83.5571			62.8	-46.3867							62.8	-108.887																							62.8	-147.766
					62.9	-284.119			63	-84.5337			62.9	-45.166							62.9	-107.056																							62.9	-146.912
					63	-281.86			63.1	-84.7168			63	-44.1894							63	-109.253																							63	-147.949
					63.1	-280.518			63.2	-81.2988			63.1	-46.814							63.1	-107.605																							63.1	-145.386
					63.2	-277.039			63.3	-80.4443			63.2	-46.3867							63.2	-103.394																							63.2	-148.071
					63.3	-279.48			63.4	-80.8716			63.3	-45.5933							63.3	-109.619																							63.3	-148.926
					63.4	-285.278			63.5	-80.9326			63.4	-44.4946							63.4	-106.445																							63.4	-147.583
					63.5	-282.898			63.6	-84.5947			63.5	-46.2646							63.5	-109.07																							63.5	-145.02
					63.6	-282.043			63.7	-84.7778			63.6	-46.3257							63.6	-108.032																							63.6	-147.461
					63.7	-282.959			63.8	-76.9043			63.7	-44.8608							63.7	-108.887																							63.7	-148.621
					63.8	-283.081			63.9	-76.416			63.8	-45.166							63.8	-103.882																							63.8	-148.682
					63.9	-280.701			64	-74.4018			63.9	-46.875							63.9	-103.516																							63.9	-148.254
					64	-280.457			64.1	-78.0029			64	-44.8608							64	-94.4214																							64	-148.376
					64.1	-283.02			64.2	-79.2236			64.1	-44.3726							64.1	-91.3696																							64.1	-150.269
					64.2	-285.522			64.3	-80.3833			64.2	-45.0439							64.2	-93.2617																							64.2	-149.231
					64.3	-286.621			64.4	-79.3457			64.3	-46.6309							64.3	-99.8535																							64.3	-158.63
					64.4	-284.912			64.5	-79.1016			64.4	-46.875							64.4	-98.5107																							64.4	-158.63
					64.5	-283.142			64.6	-80.3223			64.5	-45.227							64.5	-101.746																							64.5	-134.46
					64.6	-283.997			64.7	-77.3926			64.6	-43.8232							64.6	-97.29																							64.6	-141.968
					64.7	-282.898			64.8	-78.125			64.7	-46.936							64.7	-101.257																							64.7	-146.912
					64.8	-285.583			64.9	-76.355			64.8	-45.3491							64.8	-100.22																							64.8	-149.109
					64.9	-285.278			65	-80.5054			64.9	-43.457							64.9	-93.9331																							64.9	-151.062
					65	-282.41			65.1	-81.8481			65	-45.2881							65	-85.2661																							65	-147.888
					65.1	-287.415			65.2	-79.1626			65.1	-44.4336							65.1	-40.4663																							65.1	-148.743
					65.2	-281.677			65.3	-79.5898			65.2	-47.2412							65.2	-58.2886																							65.2	-149.536
					65.3	-288.269			65.4	-77.0264			65.3	-43.8843							65.3	-39.3066																							65.3	-151.001
					65.4	-285.767			65.5	-75.9277			65.4	-44.5557							65.4	-46.9971																							65.4	-149.841
					65.5	-283.569			65.6	-78.8574			65.5	-46.0205							65.5	-587.707																							65.5	-151.428
					65.6	-289.124			65.7	-81.1157			65.6	-41.9922							65.6	-836.975																							65.6	-151.916
					65.7	-287.048			65.8	-79.5898			65.7	-46.814							65.7	-182.739																							65.7	-150.33
					65.8	-285.461			65.9	-81.665			65.8	-46.1426							65.8	-105.286																							65.8	-152.649
					65.9	-282.715			66	-73.7305			65.9	-46.0815							65.9	-127.93																							65.9	-151.733
					66	-278.442			66.1	-72.4487			66	-42.9077							66	-268.188																							66	-146.729
					66.1	-281.494			66.2	-74.1577			66.1	-43.0908							66.1	-211.914																							66.1	-146.851
					66.2	-281.494			66.3	-75.8667			66.2	-44.8608							66.2	-150.33																							66.2	-145.081
					66.3	-289.795			66.4	-76.9043			66.3	-43.5181							66.3	-112.366																							66.3	-143.555
					66.4	-286.621			66.5	-77.3926			66.4	-43.1519							66.4	-111.145																							66.4	-149.414
					66.5	-286.377			66.6	-78.064			66.5	-43.1519							66.5	-107.3																							66.5	-148.315
					66.6	-286.56			66.7	-74.1577			66.6	-46.0205							66.6	-103.699																							66.6	-150.94
					66.7	-283.508			66.8	-76.6601			66.7	-42.4805							66.7	-103.027																							66.7	-150.085
					66.8	-281.738			66.9	-75.8667			66.8	-42.1753							66.8	-99.6704																							66.8	-145.142
					66.9	-282.837			67	-73.9746			66.9	-41.9311							66.9	-97.3511																							66.9	-144.043
					67	-286.072			67.1	-77.2095			67	-43.0908							67	-89.9658																							67	-143.616
					67.1	-283.752			67.2	-86.2427			67.1	-43.335							67.1	-77.3926																							67.1	-146.729
					67.2	-286.133			67.3	-77.8809			67.2	-41.8701							67.2	-66.1011																							67.2	-151.733
					67.3	-286.804			67.4	-77.2705			67.3	-44.8608							67.3	-48.5229																							67.3	-150.146
					67.4	-283.203			67.5	-79.895			67.4	-48.645							67.4	-34.4849																							67.4	-145.691
					67.5	-289.673			67.6	-75.9888			67.5	-44.9219							67.5	-19.165																							67.5	-152.222
					67.6	-285.583			67.7	-78.0029			67.6	-46.2646							67.6	-19.104																							67.6	-153.076
					67.7	-286.072			67.8	-75.3174			67.7	-42.8467							67.7	-13.1836																							67.7	-170.959
					67.8	-288.879			67.9	-72.5098			67.8	-45.5322							67.8	-10.0098																							67.8	-189.697
					67.9	-282.043			68	-72.5098			67.9	-43.335							67.9	-8.05664																							67.9	-200.867
					68	-282.715			68.1	-73.5474			68	-42.8467							68	-7.56836																							68	-199.524
					68.1	-287.109			68.2	-80.0171			68.1	-44.3726							68.1	-6.83594																							68.1	-175.659
					68.2	-285.156			68.3	-78.0029			68.2	-44.2505							68.2	-6.16455																							68.2	-152.466
					68.3	-284.546			68.4	-77.6367			68.3	-41.9922							68.3	-5.00488																							68.3	-159.424
					68.4	-284.729			68.5	-79.895			68.4	-44.0674							68.4	-2.56348																							68.4	-152.283
					68.5	-285.156			68.6	-74.0967			68.5	-41.2598							68.5	-4.57764																							68.5	-180.176
					68.6	-288.208			68.7	-81.2988			68.6	-46.2036							68.6	-4.21143																							68.6	-198.975
					68.7	-280.212			68.8	-78.3081			68.7	-44.0674							68.7	-4.27246																							68.7	-175.781
					68.8	-281.555			68.9	-74.7681			68.8	-42.6025							68.8	-4.69971																							68.8	-83.6792
					68.9	-285.889			69	-76.5991			68.9	-41.8091							68.9	-3.90625																							68.9	-150.146
					69	-287.964			69.1	-78.6133			69	-41.9311							69	-2.92969																							69	-175.293
					69.1	-281.555			69.2	-78.7353			69.1	-42.9077							69.1	-3.78418																							69.1	-141.907
					69.2	-286.56			69.3	-73.7915			69.2	-41.9311							69.2	-3.35693																							69.2	-192.444
					69.3	-286.682			69.4	-71.9604			69.3	-44.6777							69.3	-3.2959																							69.3	-161.438
					69.4	-282.104			69.5	-71.9604			69.4	-42.4194							69.4	-3.2959																							69.4	-148.987
					69.5	-285.278			69.6	-79.1626			69.5	-42.7246							69.5	-3.96728																							69.5	1086.49
					69.6	-283.813			69.7	-71.167			69.6	-45.166							69.6	-2.62451																							69.6	-165.222
					69.7	-282.532			69.8	-77.6977			69.7	-45.0439							69.7	-2.99072																							69.7	-157.41
					69.8	-283.447			69.9	-70.8618			69.8	-43.396							69.8	-2.80762																							69.8	-144.592
					69.9	-283.447			70	-73.3032			69.9	-50.415							69.9	-3.05176																							69.9	-149.109
					70	-289.551			70.1	-77.1484			70	-44.1284							70	-2.68555																							70	501.892
					70.1	-292.114			70.2	-74.707			70.1	-46.0205							70.1	-3.54004																							70.1	-162.354
					70.2	-289.795			70.3	-75.9888			70.2	-33.3252							70.2	-2.68555																							70.2	-146.179
					70.3	-287.415			70.4	-78.4912			70.3	65.0635							70.3	-4.3335																							70.3	-140.259
					70.4	-284.485			70.5	-77.5757			70.4	103.149							70.4	-2.80762																							70.4	-87.3413
					70.5	-288.33			70.6	-71.5332			70.5	-34.5459							70.5	-2.68555																							70.5	-35.3394
					70.6	-285.828			70.7	-73.9746			70.6	-143.555							70.6	-2.74658																							70.6	-164.734
					70.7	-282.898			70.8	-77.8809			70.7	-174.927							70.7	-2.68555																							70.7	-155.395
					70.8	-286.926			70.9	-74.585			70.8	-35.4614							70.8	-3.2959																							70.8	-145.02
					70.9	-288.696			71	-74.585			70.9	26.7334							70.9	-2.0752																							70.9	-151.489
					71	-290.771			71.1	-72.937			71	36.6211							71	-2.99072																							71	1021.18
					71.1	-286.194			71.2	-73.6694			71.1	-15.0757							71.1	-2.50244																							71.1	-514.343
					71.2	-283.691			71.3	-76.416			71.2	-36.7432							71.2	-2.01416																							71.2	-151.611
					71.3	-292.297			71.4	-76.7822			71.3	-38.147							71.3	-2.44141																							71.3	-159.485
					71.4	-287.231			71.5	-73.7305			71.4	-37.4145							71.4	-3.41797																							71.4	-147.766
					71.5	-289.49			71.6	-69.0918			71.5	-29.541							71.5	-2.74658																							71.5	-183.96
					71.6	-286.682			71.7	-72.6318			71.6	-33.4473							71.6	-2.0752																							71.6	-158.936
					71.7	-287.842			71.8	-71.7773			71.7	-27.5879							71.7	-2.56348																							71.7	-165.283
					71.8	-289.001			71.9	-69.9463			71.8	-21.4844							71.8	-2.68555																							71.8	554.81
					71.9	-288.147			72	-74.585			71.9	-15.3809							71.9	-2.38037																							71.9	-604.004
					72	-294.25			72.1	-70.3735			72	-8.8501							72	-2.19727																							72	-147.095
					72.1	-290.894			72.2	-71.5332			72.1	-6.89697							72.1	-2.62451																							72.1	-144.592
					72.2	-286.987			72.3	-74.5239			72.2	-5.06592							72.2	-2.01416																							72.2	-133.85
					72.3	-291.626			72.4	-68.9697			72.3	-4.63867							72.3	-1.95312																							72.3	-149.536
					72.4	-290.955			72.5	-76.9043			72.4	-5.24902							72.4	-2.92969																							72.4	-150.574
					72.5	-288.635			72.6	-73.1201			72.5	-4.5166							72.5	-2.86865																							72.5	-140.137
					72.6	-289.062			72.7	-74.646			72.6	-4.08935							72.6	-2.13623																							72.6	-153.992
					72.7	-290.71			72.8	-76.2939			72.7	-3.84521							72.7	-2.68555																							72.7	-172.852
					72.8	-285.95			72.9	-73.7915			72.8	-3.96728							72.8	-2.68555																							72.8	-122.131
					72.9	-290.527			73	-66.1011			72.9	-4.63867							72.9	-2.01416																							72.9	-191.162
					73	-294.495			73.1	-65.8569			73	-3.2959							73	-1.58691																							73	-94.9707
					73.1	-285.217			73.2	-69.519			73.1	-3.66211							73.1	-2.44141																							73.1	-147.156
					73.2	-286.072			73.3	-70.1294			73.2	-4.15039							73.2	-2.56348																							73.2	-150.94
					73.3	-293.64			73.4	-71.1059			73.3	-3.54004							73.3	-2.13623																							73.3	-205.2
					73.4	-292.297			73.5	-69.0308			73.4	-3.23486							73.4	-2.0752																							73.4	-174.561
					73.5	-287.72			73.6	-69.2139			73.5	-3.41797							73.5	-2.31934																							73.5	-145.996
					73.6	-290.771			73.7	-69.7632			73.6	-3.479							73.6	-1.95312																							73.6	257.263
					73.7	-291.565			73.8	-71.9604			73.7	-2.62451							73.7	-2.2583																							73.7	-154.114
					73.8	-290.527			73.9	-68.9697			73.8	-2.56348							73.8	-2.68555																							73.8	-137.085
					73.9	-291.016			74	-66.7725			73.9	-3.54004							73.9	-2.80762																							73.9	-137.817
					74	-290.344			74.1	-70.6787			74	-2.99072							74	-2.13623																							74	-68.1152
					74.1	-290.161			74.2	-66.2842			74.1	-2.50244							74.1	-2.01416																							74.1	-81.2378
					74.2	-295.166			74.3	-64.8193			74.2	-2.68555							74.2	-1.34277																							74.2	-119.995
					74.3	-292.664			74.4	-69.7632			74.3	-2.74658							74.3	-2.62451																							74.3	-143.555
					74.4	-292.175			74.5	-64.6973			74.4	-2.68555							74.4	-1.46484																							74.4	-145.264
					74.5	-292.725			74.6	-68.7256			74.5	-1.77002							74.5	-3.17383																							74.5	-146.179
					74.6	-298.34			74.7	-67.1997			74.6	-3.11279							74.6	-2.2583																							74.6	-150.024
					74.7	-290.894			74.8	-64.27			74.7	-3.23486							74.7	-1.46484																							74.7	-156.372
					74.8	-295.044			74.9	-65.3076			74.8	-3.2959							74.8	-3.479																							74.8	-151.733
					74.9	-292.419			75	-70.4956			74.9	-2.92969							74.9	-1.83105																							74.9	-151.001
					75	-289.673			75.1	-69.9463			75	-3.2959							75	-2.38037																							75	-147.766
					75.1	-293.091			75.2	-66.6504			75.1	-2.44141																															75.1	-149.719
					75.2	-294.128			75.3	-68.8476			75.2	-2.38037																															75.2	-147.888
					75.3	-291.565			75.4	-71.0449			75.3	-2.74658																															75.3	-148.254
					75.4	-294.25			75.5	-62.439			75.4	-2.74658																															75.4	-148.437
					75.5	-287.781			75.6	-77.1484			75.5	-2.56348																															75.5	-149.536
					75.6	-292.114			75.7	-67.8711			75.6	-2.86865																															75.6	-150.452
					75.7	-301.575			75.8	-71.8384			75.7	-1.95312																															75.7	-147.156
					75.8	-300.842			75.9	-71.6553			75.8	-2.2583																															75.8	-148.315
					75.9	-297.974			76	-69.2749			75.9	-2.56348																															75.9	-148.499
					76	-299.927			76.1	-74.585			76	-2.62451																															76	-150.085
					76.1	-297.607			76.2	-76.1719			76.1	-2.44141																															76.1	-149.78
					76.2	-296.753			76.3	-67.1997			76.2	-2.80762																															76.2	-148.926
					76.3	-299.011			76.4	-64.8804			76.3	-2.68555																															76.3	-148.254
					76.4	-300.354			76.5	-68.6035			76.4	-3.05176																															76.4	-149.048
					76.5	-297.363			76.6	-67.0776			76.5	-2.38037																															76.5	-149.17
					76.6	-297.424			76.7	-61.2793			76.6	-2.92969																															76.6	-148.743
					76.7	-300.232			76.8	-65.2466			76.7	-3.17383																															76.7	-150.757
					76.8	-301.025			76.9	-63.9038			76.8	-2.38037																															76.8	-150.757
					76.9	-300.11			77	-66.1621			76.9	-2.56348																															76.9	-150.024
					77	-293.64			77.1	-65.5518			77	-3.05176																															77	-149.78
					77.1	-301.147			77.2	-63.4155			77.1	-2.80762																															77.1	-147.339
					77.2	-296.997			77.3	-69.397			77.2	-2.56348																															77.2	-148.743
					77.3	-295.044			77.4	-72.6929			77.3	-2.56348																															77.3	-149.475
					77.4	-295.654			77.5	-68.4814			77.4	-2.38037																															77.4	-150.33
					77.5	-295.776			77.6	-65.2466			77.5	-2.80762																															77.5	-145.142
					77.6	-290.955			77.7	-71.228			77.6	-2.50244																															77.6	-149.048
					77.7	-300.415			77.8	-73.5474			77.7	-2.92969																															77.7	-151.123
					77.8	-305.42			77.9	-71.0449			77.8	-2.86865																															77.8	-148.865
					77.9	-318.481			78	-65.6128			77.9	-2.44141																															77.9	-150.085
					78	-325.5			78.1	-64.8804			78	-2.74658																															78	-149.109
					78.1	-312.5			78.2	-64.4531			78.1	-2.56348																															78.1	-149.963
					78.2	-301.697			78.3	-69.6411			78.2	-3.78418																															78.2	-149.658
					78.3	-299.683			78.4	-66.6504			78.3	-1.95312																															78.3	-148.926
					78.4	-301.392			78.5	-65.918			78.4	-2.56348																															78.4	-149.353
					78.5	-308.044			78.6	-70.5566			78.5	-2.38037																															78.5	-148.071
					78.6	-310.913			78.7	-67.5049			78.6	-1.95312																															78.6	-147.461
					78.7	-311.768			78.8	-69.8242			78.7	-2.44141																															78.7	-147.888
					78.8	-320.129			78.9	-65.8569			78.8	-2.74658																															78.8	-148.926
					78.9	-310.608			79	-66.9556			78.9	-2.99072																															78.9	-149.536
					79	-297.852			79.1	-71.5332			79	-2.50244																															79	-149.17
					79.1	-299.133			79.2	-66.4673			79.1	-2.92969																															79.1	-150.024
					79.2	-308.533			79.3	-68.6035			79.2	-2.0752																															79.2	-150.33
					79.3	-312.683			79.4	-65.8569			79.3	-1.77002																															79.3	-149.353
					79.4	-133.118			79.5	-66.7725			79.4	-2.31934																															79.4	-150.452
					79.5	-229.37			79.6	-63.3545			79.5	-2.31934																															79.5	-150.33
					79.6	-312.073			79.7	-68.8476			79.6	-2.56348																															79.6	-149.17
					79.7	-317.566			79.8	-70.3125			79.7	-2.56348																															79.7	-149.231
					79.8	-317.383			79.9	-72.0215			79.8	-2.74658																															79.8	-150.635
					79.9	-290.649			80	-67.8101			79.9	-2.44141																															79.9	-149.658
					80	-319.153			80.1	-67.5049			80	-2.44141																															80	-151.123
					80.1	-315.369			80.2	-66.7725			80.1	-3.11279																															80.1	-149.658
					80.2	-317.993			80.3	-66.5893			80.2	-2.99072																															80.2	-151.245
					80.3	-307.739			80.4	-69.519			80.3	-2.80762																															80.3	-148.621
					80.4	-333.069			80.5	-68.9697			80.4	-3.2959																															80.4	-149.109
					80.5	-286.804			80.6	-67.3218			80.5	-2.56348																															80.5	-149.597
					80.6	-313.904			80.7	-63.5376			80.6	-2.62451																															80.6	-150.574
					80.7	-330.994			80.8	-69.0308			80.7	-2.99072																															80.7	-148.376
					80.8	-330.627			80.9	-68.6645			80.8	-2.31934																															80.8	-149.78
					80.9	-327.27			81	-69.9463			80.9	-2.01416																															80.9	-149.292
					81	-341.431			81.1	-68.1763			81	-2.2583																															81	-148.499
					81.1	-503.784			81.2	-63.5986			81.1	-3.05176																															81.1	-148.254
					81.2	-335.876			81.3	-66.7114			81.2	-1.95312
					81.3	-288.513			81.4	-64.27			81.3	-2.50244
					81.4	-262.329			81.5	-64.8804			81.4	-2.44141
					81.5	-315.43			81.6	-62.8662			81.5	-2.38037
					81.6	-323.364			81.7	-58.6548			81.6	-2.0752
					81.7	-323.975			81.8	-48.0347			81.7	-2.50244
					81.8	-323.425			81.9	-34.6069			81.8	-2.62451
					81.9	-313.354			82	-51.0254			81.9	-2.92969
					82	-329.59			82.1	-47.1802			82	-3.2959
					82.1	-320.984			82.2	-2.92969			82.1	-3.41797
					82.2	-358.887			82.3	-22.0337			82.2	-3.05176
					82.3	-309.753			82.4	64.209
					82.4	-406.555			82.5	-23.3765
					82.5	-302.612			82.6	35.8887
					82.6	-301.941			82.7	3.11279
					82.7	-255.859			82.8	531.311
					82.8	-181.335			82.9	-71.2891
					82.9	-218.567			83	-385.498
					83	-274.963			83.1	-82.0312
					83.1	-293.457			83.2	188.477
					83.2	-292.969			83.3	-281.433
					83.3	-285.95			83.4	-78.8574
					83.4	-291.931			83.5	-68.4814
					83.5	-285.645			83.6	-71.4111
					83.6	-286.011			83.7	68.6035
					83.7	-280.518			83.8	-75.2563
					83.8	-289.429			83.9	-789.734
					83.9	-284.424			84	-89.3555
					84	-292.419			84.1	-724.853
					84.1	-289.429			84.2	-38.3301
					84.2	-281.677			84.3	-63.8428
					84.3	-290.649			84.4	91.1255
					84.4	-286.499			84.5	-61.4624
					84.5	-292.664			84.6	-41.0156
					84.6	-286.011			84.7	-56.5186
					84.7	-289.429			84.8	-37.6587
					84.8	-288.33			84.9	-57.5561
					84.9	-293.64			85	-124.573
					85	-292.847			85.1	-41.9922
					85.1	-296.814			85.2	-34.0576
					85.2	-293.396			85.3	-51.2695
					85.3	-296.875			85.4	-57.251
					85.4	-290.71			85.5	-57.6172
					85.5	-291.687			85.6	-60.3027
					85.6	-292.847			85.7	-60.3638
					85.7	-296.692			85.8	-58.3496
					85.8	-299.377			85.9	-58.2275
					85.9	-296.997			86	-58.6548
					86	-296.326			86.1	-62.2559
					86.1	-298.523			86.2	-59.082
					86.2	-299.683			86.3	-62.8052
					86.3	-299.744			86.4	-59.9365
					86.4	-300.354			86.5	-65.6128
					86.5	-293.701			86.6	-62.6221
					86.6	-294.25			86.7	-60.3027
					86.7	-294.861			86.8	-62.0728
					86.8	-297.668			86.9	-57.5561
					86.9	-297.913			87	-62.7441
					87	-290.71			87.1	-61.5234
					87.1	-299.561			87.2	-57.1289
					87.2	-296.326			87.3	-57.4341
					87.3	-295.898			87.4	-61.7065
					87.4	-297.241			87.5	-58.7158
					87.5	-307.434			87.6	-58.7769
					87.6	-295.227			87.7	-58.7769
					87.7	-303.04			87.8	-59.3262
					87.8	-292.419			87.9	-60.4248
					87.9	-292.664			88	-63.7207
					88	-292.725			88.1	-63.4766
					88.1	-296.448			88.2	-65.4907
					88.2	-295.837			88.3	-62.8662
					88.3	-292.419			88.4	-59.4482
					88.4	-289.856			88.5	-60.852
					88.5	-293.335			88.6	-61.7065
					88.6	-288.574			88.7	-61.4624
					88.7	-291.809			88.8	-65.3686
					88.8	-289.001			88.9	-62.9883
					88.9	-283.386			89	-64.0259
					89	-288.696			89.1	-60.0586
					89.1	-284.668			89.2	-62.561
					89.2	-281.921			89.3	-64.9414
					89.3	-280.395			89.4	-62.8052
					89.4	-273.804			89.5	-60.4858
					89.5	-275.757			89.6	-62.9883
					89.6	-279.663			89.7	-56.8237
					89.7	-273.315			89.8	-61.3403
					89.8	-267.212			89.9	-58.2275
					89.9	-269.531			90	-58.7769
					90	-270.508			90.1	-53.1616
					90.1	-264.587			90.2	-50.7202
					90.2	-268.799			90.3	-57.373
					90.3	-271.912			90.4	-62.9272
					90.4	-267.578			90.5	-51.3306
					90.5	-266.418			90.6	-52.7954
					90.6	-264.343			90.7	-49.6826
					90.7	-266.724			90.8	-46.875
					90.8	-257.324			90.9	-47.1191
					90.9	-262.329			91	-47.3633
					91	-261.169			91.1	-49.5605
					91.1	-267.334			91.2	-48.4009
					91.2	-267.944			91.3	-42.4194
					91.3	-258.911			91.4	-38.6353
					91.4	-255.432			91.5	-41.2598
					91.5	-254.089			91.6	-36.2549
					91.6	-252.014			91.7	-35.0342
					91.7	-247.62			91.8	-36.5601
					91.8	-247.07			91.9	-37.2925
					91.9	-255.066			92	-37.7197
					92	-248.169			92.1	-33.6304
					92.1	-250.183			92.2	-30.3345
					92.2	-246.765			92.3	-34.729
					92.3	-240.967			92.4	-27.771
					92.4	-236.572			92.5	-29.48
					92.5	-237.122			92.6	-29.1138
					92.6	-240.234			92.7	-27.4048
					92.7	-238.708			92.8	-27.5879
					92.8	-236.023			92.9	-26.9775
					92.9	-234.253			93	-25.2686
					93	-235.291			93.1	-23.1934
					93.1	-230.286			93.2	-24.4141
					93.2	-228.394			93.3	-23.4985
					93.3	-228.882			93.4	-22.3999
					93.4	-228.943			93.5	-27.8931
					93.5	-227.905			93.6	-17.0288
					93.6	-223.328			93.7	-17.5781
					93.7	-224.731			93.8	-20.5078
					93.8	-228.027			93.9	-18.9819
					93.9	-222.9			94	-14.3433
					94	-222.9			94.1	-16.4795
					94.1	-222.656			94.2	-16.1743
					94.2	-227.539			94.3	-17.8223
					94.3	-214.783			94.4	-16.6016
					94.4	-219.482			94.5	-17.7612
					94.5	-217.712			94.6	-14.2212
					94.6	-219.91			94.7	-13.6108
					94.7	-220.215			94.8	-14.8926
					94.8	-224.304			94.9	-18.2495
					94.9	-207.581			95	-17.7612
					95	-207.092			95.1	-11.7187
					95.1	-203.43			95.2	-15.9912
					95.2	-206.543			95.3	-13.0005
					95.3	-205.749			95.4	-13.7329
					95.4	-205.994			95.5	-12.3901
					95.5	-210.693			95.6	-12.085
					95.6	-210.999			95.7	-11.2305
					95.7	-205.444			95.8	-12.2681
					95.8	-207.214			95.9	-13.2446
					95.9	-206.177			96	-13.6108
					96	-200.806			96.1	-13.5498
					96.1	-207.092			96.2	-11.2305
					96.2	-203.979			96.3	-11.6577
					96.3	-212.219			96.4	-12.3901
					96.4	-211.426			96.5	-12.4512
					96.5	-199.524			96.6	-13.1226
					96.6	-208.679			96.7	-10.1929
					96.7	-210.388			96.8	-10.0098
					96.8	-206.36			96.9	-10.2539
					96.9	-204.041			97	-13.1836
					97	-205.688			97.1	-12.5732
					97.1	-195.251			97.2	-11.7798
					97.2	-200.073			97.3	-10.0708
					97.3	-193.665			97.4	-11.8408
					97.4	-203.125			97.5	-12.3901
					97.5	-199.89			97.6	-12.8174
					97.6	-200.623			97.7	-14.7095
					97.7	-194.763			97.8	-10.9863
					97.8	-195.618			97.9	-12.4512
					97.9	-196.533			98	-14.4653
					98	-188.782			98.1	-12.3291
					98.1	-185.181			98.2	-11.4746
					98.2	-182.861			98.3	-11.7798
					98.3	-186.401			98.4	-11.2915
					98.4	-183.35			98.5	-10.1929
					98.5	-180.603			98.6	-11.1694
					98.6	-175.232			98.7	-11.2915
					98.7	-173.462			98.8	-11.6577
					98.8	-173.401			98.9	-10.9863
					98.9	-175.537			99	-11.2305
					99	-171.387			99.1	-11.4136
					99.1	-170.41			99.2	-11.5967
					99.2	-173.279			99.3	-12.085
					99.3	-173.401			99.4	-13.7939
					99.4	-175.232			99.5	-13.1226
					99.5	-166.87			99.6	-11.1694
					99.6	-171.509			99.7	-10.9863
					99.7	-173.157			99.8	-11.1084
					99.8	-171.265			99.9	-11.7798
					99.9	-172.241			100	-11.9019
					100	-172.913			100.1	-10.6201
					100.1	-166.016			100.2	-10.437
					100.2	-163.025			100.3	-12.7563
					100.3	-171.265			100.4	-15.686
					100.4	-161.255			100.5	-13.0615
					100.5	-166.321			100.6	-14.2822
					100.6	-161.865			100.7	-13.0615
					100.7	-163.879			100.8	-12.146
					100.8	-168.945			100.9	-13.4277
					100.9	-173.401			101	-11.7187
					101	-161.987			101.1	-13.3057
					101.1	-165.833			101.2	-13.4888
					101.2	-166.016			101.3	-13.5498
					101.3	-164.246			101.4	-11.4136
					101.4	-167.603			101.5	-14.4653
					101.5	-167.908			101.6	-14.7095
					101.6	-167.48			101.7	-11.4136
					101.7	-167.969			101.8	-15.1978
					101.8	-170.532			101.9	-15.686
					101.9	-166.199			102	-13.5498
					102	-165.039			102.1	-13.7939
					102.1	-158.02			102.2	-14.2212
					102.2	-156.677			102.3	-14.0381
					102.3	-158.752			102.4	-13.6108
					102.4	-158.325			102.5	-12.3901
					102.5	-158.569			102.6	-12.3901
					102.6	-161.804			102.7	-11.5356
					102.7	-161.255			102.8	-15.9912
					102.8	-153.137			102.9	-13.1226
					102.9	-148.437			103	-14.4043
					103	-150.452			103.1	-13.1836
					103.1	-148.56			103.2	-13.1836
					103.2	-138			103.3	-11.7798
					103.3	-144.348			103.4	-13.7939
					103.4	-144.775			103.5	-11.9629
					103.5	-137.451
					103.6	-144.104
					103.7	-142.334
					103.8	-136.841
					103.9	-140.625
					104	-137.268
					104.1	-141.418
					104.2	-132.141
					104.3	-131.531
					104.4	-136.658
					104.5	-137.024
					104.6	-138.855
					104.7	-136.047
					104.8	-133.972
					104.9	-133.606
					105	-128.357
					105.1	-131.104
					105.2	-128.54
					105.3	-132.324
					105.4	-134.338
					105.5	-128.418
					105.6	-132.935
					105.7	-125.244
					105.8	-131.897
					105.9	-125.916
					106	-125.916
					106.1	-126.587
					106.2	-125.61
					106.3	-129.517
					106.4	-128.723
					106.5	-124.512
					106.6	-122.559
					106.7	-123.84
					106.8	-122.314
					106.9	-122.375
					107	-123.779
					107.1	-116.699
					107.2	-131.47
					107.3	-122.986
					107.4	-122.681
					107.5	-116.089
					107.6	-115.479
					107.7	-119.934
					107.8	-119.629
					107.9	-113.831
					108	-115.112
					108.1	-116.516
					108.2	-114.624
					108.3	-112.732
					108.4	-116.455
					108.5	-114.319
					108.6	-114.441
					108.7	-114.014
					108.8	-105.896
					108.9	-106.201
					109	-113.892
					109.1	-110.901
					109.2	-108.704
					109.3	-106.323
					109.4	-103.882
					109.5	-107.544
					109.6	-105.286
					109.7	-107.056
					109.8	-104.431
					109.9	-106.812
					110	-105.408
					110.1	-107.361
					110.2	-106.812
					110.3	-100.403
					110.4	-100.647
					110.5	-94.6045
					110.6	-99.1821
					110.7	-94.9707
					110.8	-98.2666
					110.9	-92.2241
					111	-92.041
					111.1	-95.2148
					111.2	-96.4966
					111.3	-94.6655
					111.4	-92.4683
					111.5	-87.5244
					111.6	-95.0928
					111.7	-95.3979
					111.8	-90.1489
					111.9	-87.8296
					112	-86.2427
					112.1	-93.9331
					112.2	-86.9141
					112.3	-84.7778
					112.4	-96.0083
					112.5	-89.0503
					112.6	-87.7075
					112.7	-91.7358
					112.8	-88.1958
					112.9	-84.5947
					113	-93.4448
					113.1	-88.0737
					113.2	-85.8154
					113.3	-87.5854
					113.4	-84.0454
					113.5	-83.1299
					113.6	-88.1348
					113.7	-84.9609
					113.8	-80.9936
					113.9	-81.604
					114	-84.8389
					114.1	-83.4351
					114.2	-82.1533
					114.3	-83.4961
					114.4	-80.8716
					114.5	-80.8105
					114.6	-77.2705
					114.7	-76.9653
					114.8	-77.6977
					114.9	-78.7964
					115	-75.8667
					115.1	-79.1626
					115.2	-81.1768
					115.3	-73.1811
					115.4	-79.5898
					115.5	-73.8525
					115.6	-75.6226
					115.7	-73.2422
					115.8	-76.9653
					115.9	-76.5991
					116	-74.5239
					116.1	-73.3032
					116.2	-74.2187
					116.3	-72.2046
					116.4	-71.7163
					116.5	-70.6787
					116.6	-74.646
					116.7	-70.5566
					116.8	-67.0776
					116.9	-72.937
					117	-69.6411
					117.1	-74.2798
					117.2	-71.4111
					117.3	-70.1294
					117.4	-73.1201
					117.5	-69.397
					117.6	-70.4346
					117.7	-69.458
					117.8	-71.5332
					117.9	-71.8384
					118	-70.1904
					118.1	-70.1294
					118.2	-67.9932
					118.3	-70.0684
					118.4	-68.7256
					118.5	-66.6504
					118.6	-64.0869
					118.7	-63.8428
					118.8	-67.8101
					118.9	-68.9697
					119	-66.9556
					119.1	-67.5659
					119.2	-66.9556
					119.3	-65.0635
					119.4	-66.8335
					119.5	-67.1997
					119.6	-67.3828
					119.7	-62.8052
					119.8	-63.5986
					119.9	-66.5283
					120	-64.27
					120.1	-64.3921
					120.2	-64.0869
					120.3	-62.561
					120.4	-60.0586
					120.5	-64.3921
					120.6	-64.4531
					120.7	-62.1338
					120.8	-61.5234
					120.9	-62.8662
					121	-66.8945
					121.1	-60.791
					121.2	-65.3076
					121.3	-60.9741
					121.4	-62.8052
					121.5	-60.9741
					121.6	-59.3262
					121.7	-65.0024
					121.8	-60.4248
					121.9	-62.9272
					122	-62.1338
					122.1	-59.082
					122.2	-60.791
					122.3	-59.8144
					122.4	-59.2651
					122.5	-61.5234
					122.6	-60.9131
					122.7	-58.96
					122.8	-60.1196
					122.9	-62.8052
					123	-63.4766
					123.1	-58.3496
					123.2	-62.7441
					123.3	-57.5561
					123.4	-59.2041
					123.5	-60.0586
					123.6	-57.5561
					123.7	-54.6265
					123.8	-56.7627
					123.9	-60.791
					124	-58.4717
					124.1	-58.1055
					124.2	-58.6548
					124.3	-58.3496
					124.4	-53.6499
					124.5	-55.4199
					124.6	-57.8003
					124.7	-58.3496
					124.8	-53.4668
					124.9	-56.0303
					125	-62.6221
					125.1	-56.8237
					125.2	-55.0537
					125.3	-57.8613
					125.4	-60.1807
					125.5	-56.2744
					125.6	-56.9458
					125.7	-54.7485
					125.8	-56.0913
					125.9	-50.8423
					126	-57.4951
					126.1	-55.8472
					126.2	-58.6548
					126.3	-54.4434
					126.4	-55.7861
					126.5	-53.4058
					126.6	-50.9644
					126.7	-55.1147
					126.8	-51.7578
					126.9	-54.5654
					127	-51.5747
					127.1	-51.4526
					127.2	-52.063
					127.3	-54.3823
					127.4	-50.1709
					127.5	-56.5186
					127.6	-48.7061
					127.7	-52.3071
					127.8	-52.6123
					127.9	-53.772
					128	-52.2461
					128.1	-53.2227
					128.2	-52.3071
					128.3	-50.354
					128.4	-52.7344
					128.5	-51.1475
					128.6	-53.2227
					128.7	-51.7578
					128.8	-52.7344
					128.9	-51.4526
					129	-52.063
					129.1	-49.7436
					129.2	-51.3916
					129.3	-51.2085
					129.4	-48.1567
					129.5	-54.5654
					129.6	-47.6074
					129.7	-51.5747
					129.8	-50.354
					129.9	-47.4853
					130	-48.9502
					130.1	-50.2319
					130.2	-49.5605
					130.3	-49.6216
					130.4	-54.2603
					130.5	-51.5137
					130.6	-51.5747
					130.7	-53.5278
					130.8	-47.5464
					130.9	-49.3164
					131	-51.4526
					131.1	-52.5513
					131.2	-50.9644
					131.3	-50.9033
					131.4	-50.1709
					131.5	-48.1567
					131.6	-50.7202
					131.7	-51.5137
					131.8	-47.1802
					131.9	-47.7905
					132	-46.814
					132.1	-50.6592
					132.2	-49.7436
					132.3	-48.0957
					132.4	-48.3398
					132.5	-49.5605
					132.6	-48.0957
					132.7	-45.5933
					132.8	-46.875
					132.9	-49.7436
					133	-49.4995
					133.1	-45.4712
					133.2	-48.9502
					133.3	-47.6685
					133.4	-46.3257
					133.5	-47.3633
					133.6	-48.4619
					133.7	-48.0347
					133.8	-45.7153
					133.9	-44.5557
					134	-43.457
					134.1	-45.7153
					134.2	-46.0205
					134.3	-46.9971
					134.4	-45.5933
					134.5	-51.7578
					134.6	-45.7153
					134.7	-44.8608
					134.8	-43.8843
					134.9	-46.2036
					135	-44.7998
					135.1	-45.7153
					135.2	-47.7295
					135.3	-43.0908
					135.4	-42.9687
					135.5	-43.8232
					135.6	-46.5088
					135.7	-43.5791
					135.8	-46.5698
					135.9	-43.0908
					136	-48.8281
					136.1	-47.1802
					136.2	-45.105
					136.3	-44.8608
					136.4	-44.7388
					136.5	-43.396
					136.6	-45.7764
					136.7	-45.3491
					136.8	-46.3867
					136.9	-44.3115
					137	-43.6401
					137.1	-42.0532
					137.2	-46.0205
					137.3	-45.8984
					137.4	-48.3398
					137.5	-46.814
					137.6	-48.0957
					137.7	-43.8232
					137.8	-47.8516
					137.9	-45.4102
					138	-46.0205
					138.1	-47.1802
					138.2	-45.2881
					138.3	-44.2505
					138.4	-46.0205
					138.5	-43.396
					138.6	-44.6167
					138.7	-44.7388
					138.8	-45.105
					138.9	-43.8843
					139	-40.9546
					139.1	-42.7246
					139.2	-45.6543
					139.3	-42.5415
					139.4	-46.3257
					139.5	-47.5464
					139.6	-44.1284
					139.7	-44.3726
					139.8	-42.6636
					139.9	-45.227
					140	-42.5415
					140.1	-45.7764
					140.2	-45.7153
					140.3	-43.2129
					140.4	-45.227
					140.5	-43.396
					140.6	-43.396
					140.7	-45.8374
					140.8	-45.3491
					140.9	-46.3867
					141	-42.7856
					141.1	-44.6777
					141.2	-43.1519
					141.3	-44.2505
