# Supplementary material for: The fluoride permeation pathway and anion recognition in Fluc family fluoride channels
Source: eLife. 2021 Jul 12;10:e69482. doi: 10.7554/eLife.69482 (PMC8315801; doi:10.7554/eLife.69482)
Supplement: Figure 2—source data 5. [file elife-69482-fig2-data5.xlsx]

## Sheet: Sheet1
Fluc		Ec2-S81A/T82A	0	0.00392226	0.0173315			Bpe-S83A/T84A	0	0.00696325	0.00702986
Cl- dump			0.1	0.00836927	0.0173315				0.1	0.00890395	0.00919423
Biological replicates			0.2	0.0105928	0.0173315				0.2	0.0156964	0.00594768
			0.3	0.013928	0.0162899				0.3	0.0098743	0.0102764
			0.4	0.0105928	0.0194146				0.4	0.0127854	0.00702986
			0.5	0.0105928	0.0194146				0.5	0.0108447	0.00811205
			0.6	0.00503401	0.0194146				0.6	0.0137557	0.00919423
			0.7	0.00725751	0.0173315				0.7	0.0137557	0.00811205
			0.8	0.00614576	0.0173315				0.8	0.0147261	0.00811205
			0.9	0.00614576	0.0121237				0.9	0.0098743	0.00811205
			1	0.00725751	0.0121237				1	0.0108447	0.013523
			1.1	0.00725751	0.0121237				1.1	0.0079336	0.00702986
			1.2	0.0105928	0.0162899				1.2	0.0079336	0.0102764
			1.3	0.0105928	0.0173315				1.3	0.0079336	0.0102764
			1.4	0.013928	0.0214977				1.4	0.0098743	0.0102764
			1.5	0.0128163	0.018373				1.5	0.00890395	0.00811205
			1.6	0.013928	0.0173315				1.6	0.00890395	0.00811205
			1.7	0.0150398	0.0194146				1.7	0.011815	0.0124408
			1.8	0.0172633	0.0204562				1.8	0.011815	0.0102764
			1.9	0.00836927	0.0204562				1.9	0.0108447	0.0124408
			2	0.00948102	0.0194146				2	0.0127854	0.00919423
			2.1	0.0105928	0.0131653				2.1	0.0108447	0.00811205
			2.2	0.0117045	0.0110822				2.2	0.0108447	0.00702986
			2.3	0.00836927	0.0142068				2.3	0.0098743	0.00919423
			2.4	0.00836927	0.0152484				2.4	0.0098743	0.00919423
			2.5	0.00725751	0.0152484				2.5	0.0079336	0.00919423
			2.6	0.00614576	0.0142068				2.6	0.0108447	0.00811205
			2.7	0.00725751	0.0173315				2.7	0.00890395	0.00378331
			2.8	0.00614576	0.0110822				2.8	0.00696325	0.00702986
			2.9	0.00836927	0.0162899				2.9	0.00696325	0.00594768
			3	0.00614576	0.0110822				3	0.0079336	0.00702986
			3.1	0.00725751	0.0142068				3.1	0.00890395	0.0048655
			3.2	0.00503401	0.0142068				3.2	0.0108447	0.00811205
			3.3	0.00948102	0.0152484				3.3	0.0098743	0.00702986
			3.4	0.00948102	0.0142068				3.4	0.00696325	0.0113586
			3.5	0.0117045	0.0152484				3.5	0.00308184	0.013523
			3.6	0.0105928	0.0162899				3.6	0.00405219	0.0124408
			3.7	0.0117045	0.0173315				3.7	0.00502254	0.0156873
			3.8	0.00725751	0.0152484				3.8	0.00308184	0.0113586
			3.9	0.0105928	0.0152484				3.9	0.00405219	0.013523
			4	0.0117045	0.0131653				4	0.0059929	0.00811205
			4.1	0.00948102	0.0121237				4.1	0.00502254	0.0113586
			4.2	0.00948102	0.0121237				4.2	0.00696325	0.0102764
			4.3	0.00725751	0.0121237				4.3	0.0079336	0.0113586
			4.4	0.00614576	0.0131653				4.4	0.0098743	0.013523
			4.5	0.00392226	0.0142068				4.5	0.00502254	0.0124408
			4.6	0.00948102	0.0131653				4.6	0.00405219	0.0102764
			4.7	0.00725751	0.0121237				4.7	0.00502254	0.0113586
			4.8	0.00948102	0.0152484				4.8	0.00405219	0.0124408
			4.9	0.00503401	0.0131653				4.9	0.0059929	0.0113586
			5	0.00836927	0.0131653				5	0.00502254	0.013523
			5.1	0.00725751	0.0110822				5.1	0.00308184	0.00919423
			5.2	0.00836927	0.0121237				5.2	0.00502254	0.0102764
			5.3	0.00836927	0.0121237				5.3	0.00696325	0.0102764
			5.4	0.00614576	0.0121237				5.4	0.00502254	0.0113586
			5.5	0.00614576	0.0142068				5.5	0.0059929	0.0124408
			5.6	0.00836927	0.0152484				5.6	0.0059929	0.00919423
			5.7	0.00836927	0.0173315				5.7	0.0079336	0.0124408
			5.8	0.00725751	0.0298302				5.8	0.00696325	0.00919423
			5.9	0.00836927	0.027747				5.9	0.0059929	0.00919423
			6	0.00725751	0.0308717				6	0.00211149	0.00811205
			6.1	0.00836927	0.0287886				6.1	0.00308184	0.00919423
			6.2	0.00836927	0.027747				6.2	0.00308184	0.0102764
			6.3	0.00614576	0.0287886				6.3	0.00502254	0.00811205
			6.4	0.00614576	0.0392042				6.4	0.00405219	0.00919423
			6.5	0.00725751	0.0412873				6.5	0.00308184	0.00378331
			6.6	0.0105928	0.027747				6.6	0.00308184	0.0102764
			6.7	0.00948102	0.0173315				6.7	0.00405219	0.00919423
			6.8	0.0105928	0.0142068				6.8	0.00502254	0.0102764
			6.9	0.00836927	0.0162899				6.9	0.00405219	0.00919423
			7	0.0105928	0.0194146				7	0.00211149	0.0102764
			7.1	0.00948102	0.0194146				7.1	0.00502254	0.00919423
			7.2	0.0117045	0.0173315				7.2	0.00405219	0.00919423
			7.3	0.00725751	0.0204562				7.3	0.00502254	0.0124408
			7.4	0.00725751	0.0204562				7.4	0.00211149	0.00594768
			7.5	0.00614576	0.0214977				7.5	0.00114113	0.00919423
			7.6	0.0194868	0.0204562				7.6	0.00308184	0.013523
			7.7	0.0283808	0.0204562				7.7	0.0059929	0.0146052
			7.8	0.0261573	0.0308717				7.8	0.00405219	0.013523
			7.9	0.0417218	0.0225393				7.9	0.00308184	0.0178517
			8	0.027269	0.0152484				8	0.00405219	0.0210983
			8.1	0.0150398	0.018373				8.1	0.00211149	0.0178517
			8.2	0.00614576	0.0131653				8.2	0.00308184	0.0178517
			8.3	0.000587005	0.0162899				8.3	0.00405219	0.0124408
			8.4	0.000587005	0.0142068				8.4	0.00502254	0.0102764
			8.5	0.000587005	0.0152484				8.5	0.00502254	0.00702986
			8.6	-0.000524747	0.018373				8.6	0.0059929	0.013523
			8.7	-0.00274825	0.018373				8.7	0.00502254	0.013523
			8.8	0.00169876	0.0173315				8.8	0.00696325	0.0156873
			8.9	-0.0016365	0.018373				8.9	0.00308184	0.0167695
			9	0.00169876	0.0204562				9	0.0059929	0.0102764
			9.1	-0.000524747	0.0194146				9.1	0.00502254	0.0124408
			9.2	0.00169876	0.0194146				9.2	0.00502254	0.0146052
			9.3	-0.000524747	0.0194146				9.3	0.00502254	0.0156873
			9.4	-0.000524747	0.0194146				9.4	0.00696325	0.00919423
			9.5	-0.00497175	0.0225393				9.5	0.00696325	0.00702986
			9.6	-0.00386	0.0173315				9.6	0.00890395	0.00594768
			9.7	-0.00830701	0.0152484				9.7	0.00696325	0.00378331
			9.8	-0.0060835	0.0142068				9.8	0.0079336	0.00594768
			9.9	-0.0060835	0.0142068				9.9	0.00696325	0.00594768
			10	-0.00497175	0.0173315				10	0.0108447	0.00378331
			10.1	-0.00497175	0.0152484				10.1	0.00696325	0.00378331
			10.2	-0.00497175	0.0162899				10.2	0.00890395	0.00161895
			10.3	-0.00386	0.0162899				10.3	0.00696325	0.00161895
			10.4	-0.0060835	0.0131653				10.4	0.0059929	0.00378331
			10.5	-0.00719526	0.0131653				10.5	0.00405219	0.00811205
			10.6	-0.00830701	0.0173315				10.6	0.0079336	0.0102764
			10.7	-0.00497175	0.018373				10.7	0.00890395	0.00270113
			10.8	-0.00719526	0.0214977				10.8	0.00696325	0.00378331
			10.9	-0.000524747	0.0204562				10.9	0.00405219	0.00594768
			11	-0.00386	0.0204562				11	0.00405219	0.0102764
			11.1	0.00169876	0.0173315				11.1	0.00308184	0.0113586
			11.2	0.000587005	0.018373				11.2	0.0059929	0.013523
			11.3	-0.000524747	0.0152484				11.3	0.00696325	0.00594768
			11.4	0.000587005	0.0173315				11.4	0.00696325	0.0048655
			11.5	-0.000524747	0.0214977				11.5	0.00696325	0.00811205
			11.6	-0.0016365	0.0194146				11.6	0.00696325	0.000536763
			11.7	-0.00719526	0.0214977				11.7	0.0059929	-0.00595634
			11.8	-0.00941876	0.0256639				11.8	0.00890395	-0.00920289
			11.9	-0.0116423	0.0256639				11.9	0.0059929	-0.0124494
			12	-0.00941876	0.018373				12	0.00405219	-0.015696
			12.1	-0.00941876	0.00899904				12.1	0.00502254	-0.0124494
			12.2	-0.0060835	0.00587437				12.2	0.00696325	-0.015696
			12.3	-0.00830701	0.0131653				12.3	0.0059929	-0.0102851
			12.4	-0.0060835	0.018373				12.4	0.00405219	-0.0124494
			12.5	-0.0060835	0.0121237				12.5	0.00308184	-0.0135316
			12.6	-0.00497175	0.0131653				12.6	0.00211149	-0.015696
			12.7	-0.00941876	0.0131653				12.7	0.00405219	-0.0178604
			12.8	-0.0060835	0.0173315				12.8	0.0059929	-0.0178604
			12.9	-0.00830701	0.0152484				12.9	0.0059929	-0.0200247
			13	-0.0105305	0.0194146				13	0.00502254	-0.0135316
			13.1	-0.00719526	0.0204562				13.1	0.0059929	-0.0135316
			13.2	-0.00830701	0.0194146				13.2	0.00405219	-0.0124494
			13.3	-0.00830701	0.0162899				13.3	0.00405219	-0.0124494
			13.4	-0.0105305	0.0194146				13.4	0.00308184	-0.0113673
			13.5	-0.00830701	0.0162899				13.5	0.00405219	-0.0167782
			13.6	-0.0105305	0.0194146				13.6	0.00308184	-0.0113673
			13.7	-0.00941876	0.018373				13.7	0.00405219	-0.0113673
			13.8	-0.0116423	0.0214977				13.8	0.00502254	-0.00920289
			13.9	-0.0105305	0.018373				13.9	0.00502254	-0.00487416
			14	-0.0105305	0.018373				14	0.00308184	-0.0016276
			14.1	-0.00497175	0.018373				14.1	0.00405219	0.00378331
			14.2	-0.0060835	0.0173315				14.2	0.00405219	0.00594768
			14.3	-0.00497175	0.018373				14.3	0.00502254	0.0113586
			14.4	-0.00719526	0.0204562				14.4	0.00502254	0.0124408
			14.5	-0.00830701	0.018373				14.5	0.00502254	0.0189339
			14.6	-0.0105305	0.018373				14.6	0.00405219	0.013523
			14.7	-0.00941876	0.0173315				14.7	0.0059929	0.0113586
			14.8	-0.0060835	0.0204562				14.8	0.0059929	0.0124408
			14.9	-0.00497175	0.018373				14.9	0.00308184	0.0146052
			15	-0.00497175	0.018373				15	0.00308184	0.0167695
			15.1	-0.00497175	0.0173315				15.1	0.00405219	0.0178517
			15.2	-0.00497175	0.0194146				15.2	0.00405219	0.0210983
			15.3	-0.00719526	0.0173315				15.3	0.00308184	0.0189339
			15.4	-0.00497175	0.018373				15.4	0.00308184	0.0178517
			15.5	-0.00497175	0.0152484				15.5	0.00502254	0.0200161
			15.6	-0.00497175	0.018373				15.6	0.00211149	0.0221804
			15.7	-0.00497175	0.0173315				15.7	0.0059929	0.0200161
			15.8	-0.00386	0.018373				15.8	0.00405219	0.0210983
			15.9	-0.0060835	0.0162899				15.9	0.00502254	0.0210983
			16	-0.00386	0.0194146				16	0.00405219	0.0200161
			16.1	-0.00497175	0.0162899				16.1	0.0059929	0.0232626
			16.2	-0.00274825	0.0225393				16.2	0.00405219	0.0210983
			16.3	-0.00497175	0.0225393				16.3	0.00308184	0.0243448
			16.4	-0.00941876	0.0246224				16.4	0.00211149	0.0232626
			16.5	-0.0138658	0.018373				16.5	0.00308184	0.0200161
			16.6	-0.0138658	0.0194146				16.6	0.00211149	0.0189339
			16.7	-0.0138658	0.018373				16.7	0.00114113	0.0210983
			16.8	-0.012754	0.0214977				16.8	-0.00079957	0.0243448
			16.9	-0.0105305	0.0225393				16.9	0.000170782	0.0232626
			17	-0.0116423	0.0225393				17	0.000170782	0.0243448
			17.1	-0.012754	0.0235808				17.1	0.000170782	0.0189339
			17.2	-0.012754	0.0194146				17.2	0.00114113	0.0189339
			17.3	-0.00941876	0.0194146				17.3	0.00211149	0.0178517
			17.4	-0.0116423	0.0162899				17.4	0.00502254	0.0200161
			17.5	-0.00719526	0.0204562				17.5	0.000170782	0.0189339
			17.6	-0.00719526	0.018373				17.6	0.00405219	0.0221804
			17.7	-0.0105305	0.0173315				17.7	0.00405219	0.0243448
			17.8	-0.0149775	0.0152484				17.8	0.0059929	0.0221804
			17.9	-0.0149775	0.0173315				17.9	0.0079336	0.0243448
			18	-0.012754	0.0162899				18	0.0166668	0.0200161
			18.1	-0.0105305	0.0194146				18.1	0.0147261	0.0221804
			18.2	-0.00830701	0.0162899				18.2	0.0224889	0.0200161
			18.3	-0.00830701	0.0173315				18.3	0.0292813	0.0210983
			18.4	-0.0060835	0.018373				18.4	0.0224889	0.0210983
			18.5	-0.00830701	0.0194146				18.5	0.0147261	0.0232626
			18.6	-0.00386	0.018373				18.6	0.0205482	0.0200161
			18.7	-0.00497175	0.0173315				18.7	0.0292813	0.0232626
			18.8	-0.0016365	0.0246224				18.8	0.0176371	0.0189339
			18.9	-0.00386	0.0214977				18.9	0.0127854	0.0210983
			19	-0.0060835	0.00691593				19	0.0098743	0.0232626
			19.1	-0.000524747	0.00274971				19.1	0.0098743	0.0124408
			19.2	-0.00386	0.0110822				19.2	0.0079336	0.00702986
			19.3	-0.000524747	0.0110822				19.3	0.011815	0.0156873
			19.4	-0.00274825	0.018373				19.4	0.00890395	0.0221804
			19.5	0.000587005	0.0194146				19.5	0.0108447	0.0210983
			19.6	-0.00386	0.0214977				19.6	0.00890395	0.0232626
			19.7	-0.000524747	0.0194146				19.7	0.0098743	0.0221804
			19.8	-0.00386	0.0214977				19.8	0.0098743	0.0178517
			19.9	-0.00274825	0.0214977				19.9	0.00890395	0.0232626
			20	-0.00497175	0.0225393				20	0.0108447	0.0167695
			20.1	-0.00386	0.0225393				20.1	0.0108447	0.0167695
			20.2	-0.00274825	0.0235808				20.2	0.0108447	0.0189339
			20.3	-0.0016365	0.0246224				20.3	0.0098743	0.0221804
			20.4	-0.000524747	0.0225393				20.4	0.0108447	0.0189339
			20.5	-0.00274825	0.0225393				20.5	0.0079336	0.0200161
			20.6	-0.0016365	0.018373				20.6	0.00890395	0.0178517
			20.7	-0.00386	0.0204562				20.7	0.00308184	0.0200161
			20.8	-0.00719526	0.0194146				20.8	0.00308184	0.0221804
			20.9	-0.0116423	0.0225393				20.9	0.000170782	0.0221804
			21	-0.00386	0.0204562				21	0.00308184	0.0210983
			21.1	-0.00274825	0.0225393				21.1	0.00308184	0.0200161
			21.2	-0.0016365	0.0194146				21.2	0.0059929	0.0221804
			21.3	-0.00386	0.0246224				21.3	0.00696325	0.0210983
			21.4	-0.000524747	0.0246224				21.4	0.00696325	0.0243448
			21.5	-0.00497175	0.0267055				21.5	0.00696325	0.0232626
			21.6	-0.00497175	0.0256639				21.6	0.00696325	0.0232626
			21.7	-0.00386	0.027747				21.7	0.00890395	0.0178517
			21.8	-0.00274825	0.0246224				21.8	0.00890395	-0.00270979
			21.9	-0.00497175	0.0225393				21.9	0.0098743	-0.00812071
			22	-0.00719526	0.0214977				22	0.00696325	-0.0124494
			22.1	-0.0105305	0.0204562				22.1	0.0098743	-0.00920289
			22.2	-0.00941876	0.0225393				22.2	0.0079336	0.000536763
			22.3	-0.00497175	0.0225393				22.3	0.00890395	0.0102764
			22.4	-0.00386	0.0308717				22.4	0.0059929	0.0113586
			22.5	-0.000524747	0.0287886				22.5	0.00696325	0.0167695
			22.6	-0.00386	0.0329548				22.6	0.00696325	0.0102764
			22.7	-0.00386	0.0319133				22.7	0.0079336	-0.0016276
			22.8	-0.0105305	0.0329548				22.8	0.0079336	0.00161895
			22.9	-0.00719526	0.0267055				22.9	0.00696325	0.0102764
			23	-0.0060835	0.027747				23	0.00405219	0.0156873
			23.1	-0.0016365	0.0235808				23.1	0.00696325	0.0167695
			23.2	-0.00274825	0.0287886				23.2	0.00696325	0.0167695
			23.3	-0.000524747	0.027747				23.3	0.00405219	0.0200161
			23.4	0.00281051	0.0308717				23.4	0.00890395	0.0221804
			23.5	-0.000524747	0.027747				23.5	0.00696325	0.0221804
			23.6	-0.000524747	0.027747				23.6	0.0079336	0.0232626
			23.7	-0.00274825	0.0235808				23.7	0.0059929	0.0243448
			23.8	-0.0016365	0.0246224				23.8	0.00890395	0.0243448
			23.9	-0.00274825	0.0287886				23.9	0.00502254	0.0200161
			24	-0.0016365	0.027747				24	0.0079336	0.0243448
			24.1	-0.000524747	0.0267055				24.1	0.00502254	0.025427
			24.2	0.00169876	0.0235808				24.2	0.00890395	0.0243448
			24.3	0.00169876	0.0256639				24.3	0.0079336	0.025427
			24.4	0.00169876	0.0214977				24.4	0.00890395	0.025427
			24.5	0.00169876	0.0246224				24.5	0.00502254	0.025427
			24.6	0.00169876	0.0235808				24.6	0.0059929	0.0232626
			24.7	-0.0016365	0.027747				24.7	0.0059929	0.0232626
			24.8	-0.00274825	0.0298302				24.8	0.0059929	0.0221804
			24.9	-0.000524747	0.0308717				24.9	0.0079336	0.025427
			25	-0.000524747	0.0267055				25	0.0079336	0.0200161
			25.1	0.00169876	0.0267055				25.1	0.00696325	0.025427
			25.2	0.000587005	0.027747				25.2	0.00405219	0.025427
			25.3	0.00392226	0.0267055				25.3	0.0079336	0.0232626
			25.4	0.000587005	0.0287886				25.4	0.0079336	-0.000545421
			25.5	0.00281051	0.0256639				25.5	0.0108447	0.000536763
			25.6	0.00392226	0.0298302				25.6	0.0098743	0.0124408
			25.7	0.000587005	0.027747				25.7	0.0098743	0.00811205
			25.8	0.00281051	0.0319133				25.8	0.0059929	0.0113586
			25.9	0.00281051	0.0319133				25.9	0.00696325	0.0210983
			26	0.00169876	0.0339964				26	0.00696325	0.025427
			26.1	0.000587005	0.0350379				26.1	0.0059929	0.0156873
			26.2	0.00281051	0.0350379				26.2	-0.00371063	0.0221804
			26.3	-0.000524747	0.0329548				26.3	0.00211149	0.0221804
			26.4	0.000587005	0.0339964				26.4	0.00405219	0.0286735
			26.5	0.00169876	0.0339964				26.5	0.00696325	0.0265092
			26.6	-0.000524747	0.0308717				26.6	0.0059929	0.025427
			26.7	0.000587005	0.0339964				26.7	0.0098743	0.0232626
			26.8	0.000587005	0.0319133				26.8	0.00502254	0.025427
			26.9	0.00169876	0.0319133				26.9	0.0079336	0.0221804
			27	0.00169876	0.0298302				27	0.00696325	0.0243448
			27.1	0.00169876	0.0350379				27.1	0.00502254	0.0275914
			27.2	0.00281051	0.0350379				27.2	0.00696325	0.025427
			27.3	0.00392226	0.0402457				27.3	0.0098743	0.0275914
			27.4	0.00392226	0.0350379				27.4	0.0079336	0.0243448
			27.5	0.00392226	0.0381626				27.5	0.00696325	0.0265092
			27.6	0.00392226	0.037121				27.6	0.00696325	0.0189339
			27.7	0.00392226	0.0381626				27.7	0.0059929	0.0265092
			27.8	0.00281051	0.037121				27.8	0.00890395	0.025427
			27.9	-0.0016365	0.0392042				27.9	0.00890395	0.0265092
			28	0.00169876	0.0402457				28	0.0079336	0.025427
			28.1	-0.0016365	0.0392042				28.1	0.0059929	0.0275914
			28.2	0.00392226	0.0423288				28.2	0.0098743	0.0243448
			28.3	0.000587005	0.0433704				28.3	0.00696325	0.0265092
			28.4	-0.000524747	0.046495				28.4	0.00696325	0.0286735
			28.5	-0.00386	0.0454535				28.5	0.00696325	0.0265092
			28.6	-0.000524747	0.0454535				28.6	0.0098743	0.0286735
			28.7	0.00281051	0.046495				28.7	0.0098743	0.025427
			28.8	0.00503401	0.0475366				28.8	0.0108447	0.0265092
			28.9	0.00725751	0.0475366				28.9	0.0108447	0.0221804
			29	0.00614576	0.0475366				29	0.0108447	0.0243448
			29.1	0.0117045	0.0485782				29.1	0.0108447	0.0210983
			29.2	0.00836927	0.0485782				29.2	0.00890395	0.0265092
			29.3	0.0128163	0.0496197				29.3	0.00696325	0.0265092
			29.4	0.0117045	0.0506613				29.4	0.00890395	0.0286735
			29.5	0.013928	0.0454535				29.5	0.00890395	0.0275914
			29.6	0.00948102	0.0423288				29.6	0.0108447	0.0275914
			29.7	0.0117045	0.0444119				29.7	0.00890395	0.0308379
			29.8	0.00948102	0.0433704				29.8	0.00890395	0.0275914
			29.9	0.0128163	0.0454535				29.9	0.0098743	0.0275914
			30	0.0117045	0.0444119				30	0.0098743	0.0265092
			30.1	0.0128163	0.0454535				30.1	0.0079336	0.0308379
			30.2	0.0128163	0.0423288				30.2	0.0079336	0.0286735
			30.3	0.0128163	0.0423288				30.3	0.00696325	0.0297557
			30.4	0.0128163	0.0423288				30.4	0.011815	0.0308379
			30.5	0.013928	0.0433704				30.5	0.00696325	0.0319201
			30.6	0.0150398	0.0444119				30.6	0.00890395	0.0319201
			30.7	0.0150398	0.0444119				30.7	0.0079336	0.0308379
			30.8	0.0150398	0.0423288				30.8	0.0098743	0.0330023
			30.9	0.0150398	0.0444119				30.9	0.00502254	0.0319201
			31	0.0172633	0.0496197				31	0.00890395	0.0340845
			31.1	0.0150398	0.0485782				31.1	0.00890395	0.0319201
			31.2	0.0161515	0.0485782				31.2	0.011815	0.0308379
			31.3	0.013928	0.046495				31.3	0.0108447	0.0286735
			31.4	0.0128163	0.0412873				31.4	0.0108447	0.0297557
			31.5	0.00948102	0.0454535				31.5	0.0108447	0.0297557
			31.6	0.0105928	0.0423288				31.6	0.0079336	0.00270113
			31.7	0.00725751	0.0381626				31.7	0.0079336	-0.000545421
			31.8	0.0105928	0.0402457				31.8	-0.00176992	0.013523
			31.9	0.0128163	0.0392042				31.9	-0.00274027	0.025427
			32	0.0150398	0.0433704				32	0.00211149	0.0265092
			32.1	0.0172633	0.0423288				32.1	0.00405219	0.0265092
			32.2	0.0161515	0.0444119				32.2	0.00502254	0.0265092
			32.3	0.0194868	0.0412873				32.3	0.0059929	0.0286735
			32.4	0.0194868	0.0454535				32.4	0.00890395	0.025427
			32.5	0.0205985	0.0475366				32.5	0.0079336	0.0275914
			32.6	0.018375	0.0475366				32.6	0.0108447	0.0297557
			32.7	0.0161515	0.046495				32.7	0.0108447	0.0297557
			32.8	0.0150398	0.0506613				32.8	0.0098743	0.0113586
			32.9	0.0172633	0.0506613				32.9	0.0079336	0.00594768
			33	0.0161515	0.0517028				33	0.0079336	0.0048655
			33.1	0.0161515	0.0517028				33.1	0.0098743	0.00702986
			33.2	0.018375	0.0496197				33.2	0.011815	0.0189339
			33.3	0.018375	0.0433704				33.3	0.0098743	0.0243448
			33.4	0.018375	0.0444119				33.4	0.0098743	0.0275914
			33.5	0.0205985	0.0496197				33.5	0.00890395	0.0286735
			33.6	0.0194868	0.0475366				33.6	0.0098743	0.0319201
			33.7	0.0239338	0.0496197				33.7	0.0108447	0.0297557
			33.8	0.027269	0.046495				33.8	0.0108447	0.0340845
			33.9	0.027269	0.046495				33.9	0.011815	0.0330023
			34	0.0283808	0.0475366				34	0.0108447	0.0340845
			34.1	0.0250455	0.0496197				34.1	0.00890395	0.0286735
			34.2	0.0205985	0.0475366				34.2	0.00890395	0.0167695
			34.3	0.0205985	0.0517028				34.3	0.0098743	0.0102764
			34.4	0.0250455	0.0527444				34.4	0.0098743	0.0167695
			34.5	0.022822	0.0527444				34.5	0.011815	0.0265092
			34.6	0.0261573	0.046495				34.6	0.00890395	0.0286735
			34.7	0.0261573	0.0517028				34.7	0.0079336	0.0308379
			34.8	0.027269	0.0496197				34.8	0.0059929	0.0319201
			34.9	0.0261573	0.0475366				34.9	0.0098743	0.0319201
			35	0.0306043	0.0485782				35	0.00890395	0.0167695
			35.1	0.0283808	0.0475366				35.1	0.0127854	0.0102764
			35.2	0.0294925	0.0475366				35.2	0.0108447	0.0102764
			35.3	0.0261573	0.0485782				35.3	0.0108447	0.0232626
			35.4	0.027269	0.0496197				35.4	0.0098743	0.0265092
			35.5	0.0239338	0.0485782				35.5	0.011815	0.0286735
			35.6	0.0250455	0.0517028				35.6	0.011815	0.0308379
			35.7	0.0261573	0.0496197				35.7	0.00696325	0.0308379
			35.8	0.0250455	0.0485782				35.8	0.011815	0.0297557
			35.9	0.0283808	0.0454535				35.9	0.0108447	0.0297557
			36	0.0283808	0.0485782				36	0.00890395	0.0200161
			36.1	0.027269	0.046495				36.1	0.00308184	0.013523
			36.2	0.0261573	0.0475366				36.2	0.00502254	0.0243448
			36.3	0.027269	0.0475366				36.3	0.00405219	0.025427
			36.4	0.0261573	0.0475366				36.4	0.0059929	0.0286735
			36.5	0.0283808	0.0454535				36.5	0.00308184	0.0297557
			36.6	0.0294925	0.0444119				36.6	0.00308184	0.0319201
			36.7	0.0294925	0.0454535				36.7	0.00114113	0.0330023
			36.8	0.0283808	0.0454535				36.8	0.0059929	0.0319201
			36.9	0.0294925	0.0475366				36.9	0.00405219	0.0340845
			37	0.0294925	0.0475366				37	0.0059929	0.0340845
			37.1	0.0294925	0.0485782				37.1	0.0059929	0.0362488
			37.2	0.0294925	0.0517028				37.2	0.00696325	0.0362488
			37.3	0.031716	0.055869				37.3	0.00211149	0.0384132
			37.4	0.0328278	0.055869				37.4	0.00502254	0.037331
			37.5	0.0306043	0.0569106				37.5	0.0079336	0.0362488
			37.6	0.0339395	0.0537859				37.6	0.0079336	0.0351666
			37.7	0.0306043	0.0527444				37.7	0.0098743	0.0362488
			37.8	0.0328278	0.0517028				37.8	0.00890395	0.0351666
			37.9	0.0328278	0.0548275				37.9	-0.00274027	0.037331
			38	0.0328278	0.0527444				38	0.000170782	0.0394954
			38.1	0.0328278	0.055869				38.1	0.00696325	0.037331
			38.2	0.0328278	0.0517028				38.2	0.00696325	0.037331
			38.3	0.0294925	0.0548275				38.3	0.00890395	0.037331
			38.4	0.031716	0.0537859				38.4	0.00890395	0.0416597
			38.5	0.0339395	0.0579522				38.5	0.0127854	0.0394954
			38.6	0.0350513	0.0600353				38.6	0.0079336	0.0394954
			38.7	0.0350513	0.0548275				38.7	0.0098743	0.037331
			38.8	0.0361631	0.0569106				38.8	0.0059929	0.037331
			38.9	0.0372748	0.0579522				38.9	0.0127854	0.0394954
			39	0.0350513	0.0579522				39	0.0079336	0.0243448
			39.1	0.0383866	0.0579522				39.1	0.0079336	0.0124408
			39.2	0.0361631	0.0621184				39.2	0.0059929	0.013523
			39.3	0.0361631	0.0589937				39.3	0.0079336	0.0275914
			39.4	0.0350513	0.0610768				39.4	0.0108447	0.0297557
			39.5	0.0372748	0.0621184				39.5	0.0108447	0.0362488
			39.6	0.0383866	0.065243				39.6	0.0127854	0.037331
			39.7	0.0361631	0.0610768				39.7	0.0137557	0.0362488
			39.8	0.0394983	0.0610768				39.8	0.0147261	0.0351666
			39.9	0.0350513	0.0600353				39.9	0.011815	0.0394954
			40	0.0372748	0.0589937				40	0.0137557	0.0405776
			40.1	0.0350513	0.0589937				40.1	0.0137557	0.0416597
			40.2	0.0350513	0.0569106				40.2	0.0166668	0.0427419
			40.3	0.0350513	0.055869				40.3	0.0166668	0.0394954
			40.4	0.0372748	0.0569106				40.4	0.0186075	0.0405776
			40.5	0.0328278	0.0610768				40.5	0.0166668	0.0384132
			40.6	0.0339395	0.0589937				40.6	0.0195778	0.0427419
			40.7	0.0372748	0.0621184				40.7	0.0156964	0.0362488
			40.8	0.0361631	0.0600353				40.8	0.0186075	0.0362488
			40.9	0.0383866	0.0610768				40.9	0.0186075	0.0351666
			41	0.0361631	0.0610768				41	0.0186075	0.0362488
			41.1	0.0383866	0.0621184				41.1	0.0186075	0.0362488
			41.2	0.0339395	0.0642015				41.2	0.0195778	0.037331
			41.3	0.0372748	0.065243				41.3	0.0186075	0.0265092
			41.4	0.0361631	0.0662846				41.4	0.0224889	0.013523
			41.5	0.0383866	0.0642015				41.5	0.0195778	0.0156873
			41.6	0.0383866	0.0642015				41.6	0.0195778	0.0265092
			41.7	0.0406101	0.0662846				41.7	0.0195778	0.037331
			41.8	0.0394983	0.0662846				41.8	0.0234592	0.0351666
			41.9	0.0394983	0.065243				41.9	0.0244296	0.0384132
			42	0.0394983	0.0642015				42	0.0215185	0.0340845
			42.1	0.0394983	0.0642015				42.1	0.0224889	0.0384132
			42.2	0.0394983	0.0621184				42.2	0.0195778	0.025427
			42.3	0.0394983	0.0694093				42.3	0.0234592	0.0200161
			42.4	0.0406101	0.0662846				42.4	0.0224889	0.0156873
			42.5	0.0372748	0.0714924				42.5	0.0253999	0.0286735
			42.6	0.0406101	0.0714924				42.6	0.0234592	0.0308379
			42.7	0.0383866	0.074617				42.7	0.0263703	0.0297557
			42.8	0.0406101	0.0714924				42.8	0.0234592	0.0189339
			42.9	0.0417218	0.0714924				42.9	0.0253999	0.0156873
			43	0.0417218	0.0735755				43	0.0224889	0.0200161
			43.1	0.0383866	0.074617				43.1	0.028311	0.025427
			43.2	0.0394983	0.0735755				43.2	0.028311	0.0340845
			43.3	0.0406101	0.0673262				43.3	0.028311	0.0351666
			43.4	0.0394983	0.0673262				43.4	0.0273406	0.0416597
			43.5	0.0417218	0.0694093				43.5	0.028311	0.0405776
			43.6	0.0383866	0.074617				43.6	0.0234592	0.0416597
			43.7	0.0372748	0.0735755				43.7	0.0244296	0.0416597
			43.8	0.0383866	0.0756586				43.8	0.0263703	0.0427419
			43.9	0.0394983	0.0704508				43.9	0.0253999	0.0416597
			44	0.0406101	0.0735755				44	0.0234592	0.0405776
			44.1	0.0417218	0.0704508				44.1	0.0244296	0.0427419
			44.2	0.0439453	0.0683677				44.2	0.0263703	0.0427419
			44.3	0.0417218	0.0673262				44.3	0.0253999	0.0449063
			44.4	0.0394983	0.0662846				44.4	0.0234592	0.0405776
			44.5	0.0383866	0.0704508				44.5	0.0147261	0.0416597
			44.6	0.0406101	0.0694093				44.6	0.0156964	0.0384132
			44.7	0.0383866	0.0735755				44.7	0.0156964	0.0405776
			44.8	0.0450571	0.0725339				44.8	0.0195778	0.0438241
			44.9	0.0417218	0.0735755				44.9	0.0205482	0.0449063
			45	0.0439453	0.0735755				45	0.0244296	0.0470707
			45.1	0.0450571	0.0725339				45.1	0.0253999	0.0449063
			45.2	0.0472806	0.0662846				45.2	0.0292813	0.0470707
			45.3	0.0450571	0.065243				45.3	0.0253999	0.0449063
			45.4	0.0461688	0.0673262				45.4	0.028311	0.049235
			45.5	0.0472806	0.0673262				45.5	0.0273406	0.0481528
			45.6	0.0450571	0.0704508				45.6	0.0321924	0.0503172
			45.7	0.0472806	0.0714924				45.7	0.0292813	0.0470707
			45.8	0.0472806	0.0714924				45.8	0.0321924	0.0481528
			45.9	0.0506158	0.0662846				45.9	0.0331628	0.0470707
			46	0.0483923	0.0662846				46	0.0312221	0.0470707
			46.1	0.0506158	0.074617				46.1	0.0302517	0.0470707
			46.2	0.0495041	0.0767002				46.2	0.0273406	0.0427419
			46.3	0.0461688	0.074617				46.3	0.0302517	0.0449063
			46.4	0.0461688	0.0756586				46.4	0.028311	0.0427419
			46.5	0.0472806	0.0777417				46.5	0.028311	0.0470707
			46.6	0.0495041	0.0735755				46.6	0.028311	0.0427419
			46.7	0.0495041	0.0704508				46.7	0.0302517	0.0427419
			46.8	0.0517276	0.0714924				46.8	0.028311	0.0416597
			46.9	0.0483923	0.0787833				46.9	0.0302517	0.0459885
			47	0.0506158	0.0725339				47	0.0302517	0.0427419
			47.1	0.0517276	0.0714924				47.1	0.0292813	0.0459885
			47.2	0.0550628	0.0673262				47.2	0.0273406	0.0470707
			47.3	0.0517276	0.0642015				47.3	0.0312221	0.049235
			47.4	0.0539511	0.0642015				47.4	0.0292813	0.0470707
			47.5	0.0506158	0.0714924				47.5	0.0302517	0.0427419
			47.6	0.0528393	0.0714924				47.6	0.0312221	0.0449063
			47.7	0.0528393	0.0756586				47.7	0.0331628	0.0427419
			47.8	0.0528393	0.0714924				47.8	0.0312221	0.0481528
			47.9	0.0561746	0.0694093				47.9	0.0351035	0.0470707
			48	0.0539511	0.0662846				48	0.0331628	0.0503172
			48.1	0.0517276	0.065243				48.1	0.0312221	0.0481528
			48.2	0.0506158	0.0683677				48.2	0.0312221	0.0503172
			48.3	0.0495041	0.0725339				48.3	0.0331628	0.0351666
			48.4	0.0495041	0.0704508				48.4	0.0331628	0.0319201
			48.5	0.0506158	0.0714924				48.5	0.0341331	0.0459885
			48.6	0.0483923	0.0756586				48.6	0.0341331	0.0513994
			48.7	0.0483923	0.0725339				48.7	0.0331628	0.049235
			48.8	0.0461688	0.0725339				48.8	0.0331628	0.0503172
			48.9	0.0506158	0.0704508				48.9	0.0351035	0.0535638
			49	0.0506158	0.0704508				49	0.0273406	0.049235
			49.1	0.0495041	0.0683677				49.1	0.0321924	0.0535638
			49.2	0.0506158	0.0683677				49.2	0.0321924	0.0524816
			49.3	0.0495041	0.0694093				49.3	0.0341331	0.0513994
			49.4	0.0506158	0.0694093				49.4	0.0331628	0.0513994
			49.5	0.0495041	0.0683677				49.5	0.0370442	0.0513994
			49.6	0.0495041	0.0694093				49.6	0.0321924	0.0503172
			49.7	0.0483923	0.0725339				49.7	0.0351035	0.049235
			49.8	0.0528393	0.0777417				49.8	0.0321924	0.0481528
			49.9	0.0517276	0.0787833				49.9	0.0360738	0.0524816
			50	0.0528393	0.0735755				50	0.0312221	0.0535638
			50.1	0.0528393	0.0725339				50.1	0.0341331	0.0557281
			50.2	0.0528393	0.0735755				50.2	0.0331628	0.0503172
			50.3	0.0550628	0.0819079				50.3	0.0370442	0.0470707
			50.4	0.0550628	0.0798248				50.4	0.0351035	0.0438241
			50.5	0.0561746	0.0787833				50.5	0.0360738	0.0232626
			50.6	0.0539511	0.0787833				50.6	0.0360738	0.0351666
			50.7	0.0550628	0.0777417				50.7	0.0370442	0.0416597
			50.8	0.0539511	0.0777417				50.8	0.0331628	0.0405776
			50.9	0.0572863	0.0798248				50.9	0.0351035	0.0265092
			51	0.0539511	0.0819079				51	0.0380145	0.025427
			51.1	0.0572863	0.0798248				51.1	0.0389849	0.0265092
			51.2	0.0550628	0.0777417				51.2	0.0360738	0.0384132
			51.3	0.0539511	0.0756586				51.3	0.0351035	0.0427419
			51.4	0.0539511	0.0777417				51.4	0.0341331	0.0438241
			51.5	0.0550628	0.0767002				51.5	0.0380145	0.0319201
			51.6	0.0550628	0.0756586				51.6	0.0341331	0.0297557
			51.7	0.0550628	0.0735755				51.7	0.0380145	0.0362488
			51.8	0.0583981	0.0777417				51.8	0.0389849	0.0427419
			51.9	0.0606216	0.0808664				51.9	0.0380145	0.0449063
			52	0.0639568	0.0787833				52	0.0380145	0.0449063
			52.1	0.0628451	0.0819079				52.1	0.0418959	0.049235
			52.2	0.0595098	0.0787833				52.2	0.0409256	0.0459885
			52.3	0.0617333	0.0798248				52.3	0.0409256	0.049235
			52.4	0.0595098	0.0777417				52.4	0.0380145	0.049235
			52.5	0.0583981	0.0829495				52.5	0.0399552	0.0503172
			52.6	0.0561746	0.0798248				52.6	0.0389849	0.049235
			52.7	0.0583981	0.0798248				52.7	0.0438366	0.0513994
			52.8	0.0583981	0.0798248				52.8	0.0389849	0.0513994
			52.9	0.0606216	0.0798248				52.9	0.0418959	0.0513994
			53	0.0595098	0.0777417				53	0.0418959	0.0503172
			53.1	0.0606216	0.0798248				53.1	0.0428663	0.0481528
			53.2	0.0606216	0.083991				53.2	0.0380145	0.0503172
			53.3	0.0595098	0.083991				53.3	0.0399552	0.0503172
			53.4	0.0617333	0.083991				53.4	0.0409256	0.049235
			53.5	0.0595098	0.0829495				53.5	0.0438366	0.0503172
			53.6	0.0639568	0.0819079				53.6	0.0409256	0.0513994
			53.7	0.0617333	0.0808664				53.7	0.0370442	0.0481528
			53.8	0.0639568	0.0787833				53.8	0.0380145	0.0503172
			53.9	0.0572863	0.0798248				53.9	0.0409256	0.0503172
			54	0.0595098	0.0808664				54	0.0399552	0.0524816
			54.1	0.0606216	0.0902404				54.1	0.0418959	0.0513994
			54.2	0.0595098	0.0902404				54.2	0.0428663	0.0535638
			54.3	0.0628451	0.0902404				54.3	0.0409256	0.0513994
			54.4	0.0617333	0.0850326				54.4	0.0418959	0.0535638
			54.5	0.0617333	0.0891988				54.5	0.0438366	0.0535638
			54.6	0.0617333	0.0860742				54.6	0.0428663	0.0557281
			54.7	0.0639568	0.0850326				54.7	0.0409256	0.0568103
			54.8	0.0639568	0.0850326				54.8	0.0457773	0.0557281
			54.9	0.0661803	0.0829495				54.9	0.0467477	0.0546459
			55	0.0628451	0.0829495				55	0.0457773	0.0535638
			55.1	0.0639568	0.083991				55.1	0.0418959	0.0568103
			55.2	0.0661803	0.0871157				55.2	0.0418959	0.0513994
			55.3	0.0639568	0.0819079				55.3	0.0399552	0.0557281
			55.4	0.0661803	0.083991				55.4	0.0467477	0.0568103
			55.5	0.0639568	0.0850326				55.5	0.0457773	0.0568103
			55.6	0.0650686	0.0891988				55.6	0.0486884	0.0535638
			55.7	0.0639568	0.0881573				55.7	0.0457773	0.0557281
			55.8	0.0661803	0.0871157				55.8	0.047718	0.0546459
			55.9	0.0672921	0.0850326				55.9	0.044807	0.0535638
			56	0.0706273	0.0850326				56	0.0486884	0.0557281
			56.1	0.0717391	0.083991				56.1	0.0496587	0.0578925
			56.2	0.0717391	0.0850326				56.2	0.0515995	0.0568103
			56.3	0.0750744	0.0850326				56.3	0.0457773	0.0557281
			56.4	0.0695156	0.0860742				56.4	0.047718	0.0589747
			56.5	0.0750744	0.0860742				56.5	0.0457773	0.0557281
			56.6	0.0728509	0.0850326				56.6	0.0389849	0.0546459
			56.7	0.0750744	0.0871157				56.7	0.0360738	0.0535638
			56.8	0.0750744	0.0798248				56.8	0.0438366	0.0546459
			56.9	0.0739626	0.083991				56.9	0.0457773	0.0535638
			57	0.0706273	0.0860742				57	0.0486884	0.0546459
			57.1	0.0661803	0.0902404				57.1	0.0467477	0.0578925
			57.2	0.0684038	0.0871157				57.2	0.0496587	0.0557281
			57.3	0.0650686	0.0881573				57.3	0.0496587	0.0557281
			57.4	0.0672921	0.0860742				57.4	0.0496587	0.0578925
			57.5	0.0661803	0.0871157				57.5	0.047718	0.0600569
			57.6	0.0695156	0.0871157				57.6	0.0496587	0.0578925
			57.7	0.0684038	0.0912819				57.7	0.0496587	0.061139
			57.8	0.0672921	0.0891988				57.8	0.0515995	0.0578925
			57.9	0.0684038	0.0912819				57.9	0.0506291	0.0600569
			58	0.0695156	0.0912819				58	0.0525698	0.0546459
			58.1	0.0717391	0.0902404				58.1	0.0506291	0.0589747
			58.2	0.0717391	0.0912819				58.2	0.0496587	0.0589747
			58.3	0.0728509	0.0912819				58.3	0.0438366	0.0600569
			58.4	0.0706273	0.093365				58.4	0.0409256	0.0589747
			58.5	0.0717391	0.093365				58.5	0.047718	0.0622212
			58.6	0.0706273	0.0954482				58.6	0.0496587	0.0600569
			58.7	0.0728509	0.0891988				58.7	0.0535402	0.0578925
			58.8	0.0739626	0.0902404				58.8	0.0496587	0.0589747
			58.9	0.0706273	0.0860742				58.9	0.0506291	0.061139
			59	0.0695156	0.0881573				59	0.0515995	0.061139
			59.1	0.0706273	0.0871157				59.1	0.0545105	0.0578925
			59.2	0.0728509	0.0944066				59.2	0.0506291	0.0589747
			59.3	0.0695156	0.0923235				59.3	0.0525698	0.0568103
			59.4	0.0706273	0.093365				59.4	0.0506291	0.0622212
			59.5	0.0661803	0.0923235				59.5	0.0535402	0.0600569
			59.6	0.0661803	0.0944066				59.6	0.0535402	0.061139
			59.7	0.0706273	0.0912819				59.7	0.0525698	0.0589747
			59.8	0.0728509	0.0923235				59.8	0.0496587	0.061139
			59.9	0.0717391	0.0964897				59.9	0.0506291	0.061139
			60	0.0695156	0.093365				60	0.0515995	0.0622212
			60.1	0.0706273	0.0975313				60.1	0.0496587	0.0600569
			60.2	0.0628451	0.093365				60.2	0.0525698	0.0600569
			60.3	0.0661803	0.0964897				60.3	0.0535402	0.0600569
			60.4	0.0617333	0.0964897				60.4	0.0545105	0.0600569
			60.5	0.0650686	0.101697				60.5	0.0545105	0.0633034
			60.6	0.0672921	0.0996144				60.6	0.0545105	0.0622212
			60.7	0.0717391	0.093365				60.7	0.0545105	0.0622212
			60.8	0.0728509	0.0954482				60.8	0.0525698	0.0622212
			60.9	0.0706273	0.0954482				60.9	0.0535402	0.0622212
			61	0.0739626	0.0996144				61	0.0535402	0.0578925
			61.1	0.0728509	0.0964897				61.1	0.0515995	0.0600569
			61.2	0.0750744	0.100656				61.2	0.0554809	0.061139
			61.3	0.0750744	0.0975313				61.3	0.0545105	0.061139
			61.4	0.0784096	0.100656				61.4	0.0564512	0.0384132
			61.5	0.0717391	0.0985728				61.5	0.0574216	0.0340845
			61.6	0.0739626	0.0985728				61.6	0.0545105	0.0330023
			61.7	0.0750744	0.101697				61.7	0.0389849	0.049235
			61.8	0.0761861	0.0985728				61.8	0.0389849	0.0546459
			61.9	0.0772979	0.0964897				61.9	0.047718	0.0578925
			62	0.0772979	0.0996144				62	0.0525698	0.0449063
			62.1	0.0784096	0.102739				62.1	0.0545105	0.0362488
			62.2	0.0784096	0.103781				62.2	0.0574216	0.0459885
			62.3	0.0784096	0.103781				62.3	0.0554809	0.0503172
			62.4	0.0772979	0.101697				62.4	0.0506291	0.0524816
			62.5	0.0806331	0.103781				62.5	0.0535402	0.0535638
			62.6	0.0795214	0.106905				62.6	0.0554809	0.0600569
			62.7	0.0806331	0.102739				62.7	0.0564512	0.061139
			62.8	0.0784096	0.103781				62.8	0.0574216	0.0633034
			62.9	0.0795214	0.103781				62.9	0.0603326	0.0568103
			63	0.0817449	0.106905				63	0.0574216	0.0438241
			63.1	0.0795214	0.104822				63.1	0.0583919	0.0405776
			63.2	0.0795214	0.104822				63.2	0.0593623	0.0427419
			63.3	0.0817449	0.107947				63.3	0.0593623	0.0449063
			63.4	0.0839684	0.108988				63.4	0.0593623	0.0535638
			63.5	0.0839684	0.106905				63.5	0.061303	0.0557281
			63.6	0.0817449	0.103781				63.6	0.0593623	0.0600569
			63.7	0.0806331	0.105864				63.7	0.0632437	0.0622212
			63.8	0.0795214	0.104822				63.8	0.0603326	0.0633034
			63.9	0.0795214	0.108988				63.9	0.0603326	0.0643856
			64	0.0761861	0.106905				64	0.061303	0.06655
			64.1	0.0761861	0.108988				64.1	0.0632437	0.06655
			64.2	0.0772979	0.106905				64.2	0.061303	0.06655
			64.3	0.0795214	0.103781				64.3	0.061303	0.0697965
			64.4	0.0772979	0.0996144				64.4	0.0583919	0.0643856
			64.5	0.0817449	0.102739				64.5	0.0603326	0.0697965
			64.6	0.0795214	0.103781				64.6	0.0603326	0.0687143
			64.7	0.0817449	0.103781				64.7	0.061303	0.0697965
			64.8	0.0817449	0.107947				64.8	0.061303	0.0676321
			64.9	0.0795214	0.108988				64.9	0.0632437	0.0676321
			65	0.0817449	0.11003				65	0.0632437	0.0697965
			65.1	0.0772979	0.107947				65.1	0.0622733	0.0687143
			65.2	0.0806331	0.108988				65.2	0.0651844	0.0687143
			65.3	0.0806331	0.108988				65.3	0.0622733	0.0708787
			65.4	0.0828566	0.113155				65.4	0.0661547	0.0687143
			65.5	0.0795214	0.112113				65.5	0.0671251	0.0697965
			65.6	0.0784096	0.116279				65.6	0.0680954	0.0730431
			65.7	0.0828566	0.116279				65.7	0.0651844	0.0697965
			65.8	0.0839684	0.118362				65.8	0.0593623	0.0687143
			65.9	0.0850801	0.120445				65.9	0.061303	0.0676321
			66	0.0828566	0.119404				66	0.064214	0.0687143
			66.1	0.0839684	0.118362				66.1	0.0632437	0.06655
			66.2	0.0795214	0.116279				66.2	0.0632437	0.0676321
			66.3	0.0806331	0.114196				66.3	0.061303	0.0687143
			66.4	0.0850801	0.115238				66.4	0.0632437	0.06655
			66.5	0.0839684	0.117321				66.5	0.0661547	0.0708787
			66.6	0.0795214	0.118362				66.6	0.0690658	0.0719609
			66.7	0.0817449	0.118362				66.7	0.064214	0.0708787
			66.8	0.0850801	0.117321				66.8	0.0671251	0.0697965
			66.9	0.0806331	0.117321				66.9	0.0661547	0.0719609
			67	0.0828566	0.118362				67	0.0680954	0.0697965
			67.1	0.0806331	0.118362				67.1	0.0680954	0.0730431
			67.2	0.0839684	0.121487				67.2	0.0680954	0.0719609
			67.3	0.0873036	0.122529				67.3	0.0680954	0.0730431
			67.4	0.0884154	0.122529				67.4	0.0680954	0.0687143
			67.5	0.0884154	0.121487				67.5	0.0690658	0.0719609
			67.6	0.0884154	0.122529				67.6	0.0700361	0.0676321
			67.7	0.0906389	0.12357				67.7	0.0729472	0.0697965
			67.8	0.0861919	0.124612				67.8	0.0700361	0.0687143
			67.9	0.0895271	0.12357				67.9	0.0690658	0.0697965
			68	0.0873036	0.125653				68	0.061303	0.0719609
			68.1	0.0895271	0.122529				68.1	0.0574216	0.0741252
			68.2	0.0850801	0.125653				68.2	0.0632437	0.0708787
			68.3	0.0917506	0.12357				68.3	0.0661547	0.0730431
			68.4	0.0884154	0.124612				68.4	0.0671251	0.0719609
			68.5	0.0884154	0.124612				68.5	0.0671251	0.0719609
			68.6	0.0906389	0.125653				68.6	0.0671251	0.0708787
			68.7	0.0884154	0.125653				68.7	0.0690658	0.0741252
			68.8	0.0884154	0.125653				68.8	0.0583919	0.0719609
			68.9	0.0861919	0.126695				68.9	0.0554809	0.0719609
			69	0.0884154	0.125653				69	0.061303	0.0676321
			69.1	0.0850801	0.126695				69.1	0.0651844	0.0719609
			69.2	0.0895271	0.125653				69.2	0.0671251	0.0708787
			69.3	0.0895271	0.124612				69.3	0.0690658	0.0730431
			69.4	0.0928624	0.121487				69.4	0.0690658	0.0719609
			69.5	0.0917506	0.121487				69.5	0.0710065	0.0708787
			69.6	0.0928624	0.122529				69.6	0.0700361	0.0730431
			69.7	0.0917506	0.12357				69.7	0.0700361	0.0719609
			69.8	0.0928624	0.122529				69.8	0.0719768	0.0730431
			69.9	0.0939741	0.12357				69.9	0.0729472	0.0730431
			70	0.0950859	0.12357				70	0.0729472	0.0752074
			70.1	0.0950859	0.124612				70.1	0.0768286	0.0719609
			70.2	0.0884154	0.12357				70.2	0.077799	0.0730431
			70.3	0.0861919	0.12357				70.3	0.0768286	0.0708787
			70.4	0.0895271	0.127736				70.4	0.0729472	0.0730431
			70.5	0.0861919	0.125653				70.5	0.0739176	0.0708787
			70.6	0.0850801	0.124612				70.6	0.0739176	0.0773718
			70.7	0.0895271	0.125653				70.7	0.0768286	0.0741252
			70.8	0.0917506	0.128778				70.8	0.0748879	0.0773718
			70.9	0.0895271	0.129819				70.9	0.0758583	0.0730431
			71	0.0884154	0.135027				71	0.0719768	0.0762896
			71.1	0.0917506	0.130861				71.1	0.0622733	0.0741252
			71.2	0.0917506	0.126695				71.2	0.0554809	0.0773718
			71.3	0.0884154	0.129819				71.3	0.0554809	0.0741252
			71.4	0.0884154	0.133986				71.4	0.0574216	0.0741252
			71.5	0.0861919	0.129819				71.5	0.0671251	0.0741252
			71.6	0.0873036	0.129819				71.6	0.0680954	0.0741252
			71.7	0.0895271	0.128778				71.7	0.0729472	0.0752074
			71.8	0.0917506	0.127736				71.8	0.0719768	0.0762896
			71.9	0.0939741	0.127736				71.9	0.0739176	0.078454
			72	0.0950859	0.128778				72	0.0739176	0.0762896
			72.1	0.0961976	0.132944				72.1	0.0739176	0.0741252
			72.2	0.0939741	0.129819				72.2	0.0729472	0.0730431
			72.3	0.0928624	0.129819				72.3	0.0758583	0.049235
			72.4	0.0928624	0.130861				72.4	0.0748879	0.0557281
			72.5	0.0939741	0.130861				72.5	0.0768286	0.0697965
			72.6	0.0939741	0.130861				72.6	0.0768286	0.0741252
			72.7	0.0906389	0.125653				72.7	0.0787693	0.0752074
			72.8	0.0928624	0.128778				72.8	0.077799	0.0773718
			72.9	0.0906389	0.125653				72.9	0.0758583	0.0795362
			73	0.0939741	0.128778				73	0.077799	0.0773718
			73.1	0.0917506	0.126695				73.1	0.08071	0.078454
			73.2	0.0906389	0.129819				73.2	0.077799	0.0817005
			73.3	0.0906389	0.125653				73.3	0.08071	0.0817005
			73.4	0.0928624	0.129819				73.4	0.0787693	0.0762896
			73.5	0.0895271	0.13711				73.5	0.08071	0.0795362
			73.6	0.0906389	0.141277				73.6	0.077799	0.0762896
			73.7	0.0917506	0.141277				73.7	0.0797397	0.0795362
			73.8	0.0917506	0.14336				73.8	0.0768286	0.0773718
			73.9	0.0928624	0.141277				73.9	0.0787693	0.078454
			74	0.0895271	0.142318				74	0.077799	0.0762896
			74.1	0.0884154	0.145443				74.1	0.0816804	0.0806184
			74.2	0.0873036	0.141277				74.2	0.08071	0.078454
			74.3	0.0884154	0.135027				74.3	0.0787693	0.0806184
			74.4	0.0906389	0.131903				74.4	0.0797397	0.0817005
			74.5	0.0917506	0.135027				74.5	0.08071	0.0806184
			74.6	0.0950859	0.128778				74.6	0.0836211	0.0795362
			74.7	0.0961976	0.132944				74.7	0.08071	0.0806184
			74.8	0.0973094	0.135027				74.8	0.0816804	0.0806184
			74.9	0.0984211	0.133986				74.9	0.0816804	0.078454
			75	0.0995329	0.135027				75	0.0797397	0.0752074
			75.1	0.0973094	0.135027				75.1	0.0768286	0.0762896
			75.2	0.0973094	0.133986				75.2	0.0816804	0.0773718
			75.3	0.0928624	0.13711				75.3	0.0797397	0.0817005
			75.4	0.0928624	0.140235				75.4	0.08071	0.0827827
			75.5	0.0950859	0.136069				75.5	0.0768286	0.0827827
			75.6	0.0939741	0.140235				75.6	0.0836211	0.0795362
			75.7	0.0917506	0.136069				75.7	0.0826507	0.0806184
			75.8	0.0928624	0.138152				75.8	0.0855618	0.0838649
			75.9	0.0950859	0.136069				75.9	0.0826507	0.0838649
			76	0.0950859	0.138152				76	0.0845914	0.0817005
			76.1	0.0973094	0.139193				76.1	0.0816804	0.0827827
			76.2	0.0928624	0.14336				76.2	0.0855618	0.0849471
			76.3	0.0928624	0.144401				76.3	0.0826507	0.0838649
			76.4	0.0928624	0.142318				76.4	0.08071	0.0817005
			76.5	0.0939741	0.141277				76.5	0.0826507	0.0827827
			76.6	0.0973094	0.138152				76.6	0.0836211	0.0849471
			76.7	0.0950859	0.142318				76.7	0.0855618	0.0838649
			76.8	0.0984211	0.139193				76.8	0.0845914	0.0827827
			76.9	0.0995329	0.141277				76.9	0.0845914	0.0806184
			77	0.100645	0.140235				77	0.0865321	0.0838649
			77.1	0.101756	0.138152				77.1	0.0855618	0.0817005
			77.2	0.10398	0.141277				77.2	0.0816804	0.0860293
			77.3	0.101756	0.142318				77.3	0.0836211	0.0838649
			77.4	0.107315	0.141277				77.4	0.0826507	0.0827827
			77.5	0.106203	0.142318				77.5	0.0680954	0.0838649
			77.6	0.10398	0.14336				77.6	0.0632437	0.0881936
			77.7	0.106203	0.139193				77.7	0.0758583	0.0860293
			77.8	0.10398	0.13711				77.8	0.0768286	0.0849471
			77.9	0.101756	0.135027				77.9	0.0826507	0.078454
			78	0.101756	0.136069				78	0.08071	0.0568103
			78.1	0.10398	0.140235				78.1	0.0865321	0.049235
			78.2	0.102868	0.14336				78.2	0.0836211	0.0546459
			78.3	0.100645	0.142318				78.3	0.0855618	0.0578925
			78.4	0.100645	0.140235				78.4	0.0865321	0.0643856
			78.5	0.0961976	0.138152				78.5	0.0884728	0.0752074
			78.6	0.0973094	0.135027				78.6	0.0875025	0.0773718
			78.7	0.0961976	0.132944				78.7	0.0894432	0.078454
			78.8	0.101756	0.133986				78.8	0.0894432	0.0806184
			78.9	0.101756	0.138152				78.9	0.0894432	0.0817005
			79	0.105092	0.136069				79	0.0884728	0.0806184
			79.1	0.100645	0.13711				79.1	0.0894432	0.0827827
			79.2	0.0961976	0.141277				79.2	0.0894432	0.0817005
			79.3	0.0995329	0.144401				79.3	0.0875025	0.078454
			79.4	0.0984211	0.14336				79.4	0.0894432	0.0773718
			79.5	0.100645	0.14336				79.5	0.0894432	0.0806184
			79.6	0.0995329	0.141277				79.6	0.0923542	0.0806184
			79.7	0.10398	0.140235				79.7	0.0894432	0.0817005
			79.8	0.101756	0.140235				79.8	0.0904135	0.0817005
			79.9	0.105092	0.141277				79.9	0.0884728	0.0827827
			80	0.106203	0.142318				80	0.0913839	0.0817005
			80.1	0.105092	0.14336				80.1	0.0894432	0.0827827
			80.2	0.107315	0.141277				80.2	0.0923542	0.0817005
			80.3	0.107315	0.14336				80.3	0.0923542	0.0838649
			80.4	0.107315	0.145443				80.4	0.0923542	0.0806184
			80.5	0.109539	0.144401				80.5	0.0904135	0.0838649
			80.6	0.111762	0.146484				80.6	0.0894432	0.0827827
			80.7	0.109539	0.144401				80.7	0.0913839	0.0817005
			80.8	0.109539	0.146484				80.8	0.0923542	0.0806184
			80.9	0.106203	0.145443				80.9	0.0933246	0.0838649
			81	0.107315	0.146484				81	0.0913839	0.0817005
			81.1	0.105092	0.145443				81.1	0.0933246	0.0827827
			81.2	0.107315	0.148567				81.2	0.0923542	0.0795362
			81.3	0.109539	0.147526				81.3	0.0952653	0.0849471
			81.4	0.108427	0.147526				81.4	0.0933246	0.0849471
			81.5	0.113986	0.149609				81.5	0.0962357	0.0881936
			81.6	0.111762	0.147526				81.6	0.0962357	0.0827827
			81.7	0.11065	0.148567				81.7	0.0933246	0.0708787
			81.8	0.109539	0.149609				81.8	0.0787693	0.0589747
			81.9	0.108427	0.151692				81.9	0.0845914	0.0633034
			82	0.109539	0.149609				82	0.0942949	0.061139
			82.1	0.11065	0.148567				82.1	0.0942949	0.0708787
			82.2	0.108427	0.146484				82.2	0.0962357	0.0773718
			82.3	0.106203	0.147526				82.3	0.0904135	0.0849471
			82.4	0.108427	0.149609				82.4	0.0855618	0.0838649
			82.5	0.108427	0.150651				82.5	0.0904135	0.0860293
			82.6	0.108427	0.151692				82.6	0.0952653	0.0849471
			82.7	0.105092	0.149609				82.7	0.0942949	0.090358
			82.8	0.108427	0.153775				82.8	0.0981764	0.0881936
			82.9	0.108427	0.151692				82.9	0.097206	0.0871115
			83	0.106203	0.152734				83	0.0952653	0.0871115
			83.1	0.106203	0.151692				83.1	0.0942949	0.0860293
			83.2	0.108427	0.153775				83.2	0.097206	0.0871115
			83.3	0.11065	0.153775				83.3	0.097206	0.0860293
			83.4	0.109539	0.152734				83.4	0.097206	0.0860293
			83.5	0.11065	0.153775				83.5	0.097206	0.0860293
			83.6	0.107315	0.151692				83.6	0.0981764	0.0871115
			83.7	0.108427	0.154817				83.7	0.0962357	0.0881936
			83.8	0.106203	0.153775				83.8	0.0962357	0.0881936
			83.9	0.107315	0.154817				83.9	0.0933246	0.090358
			84	0.105092	0.154817				84	0.0962357	0.090358
			84.1	0.108427	0.157941				84.1	0.097206	0.0860293
			84.2	0.109539	0.152734				84.2	0.0991467	0.0881936
			84.3	0.107315	0.153775				84.3	0.102058	0.0860293
			84.4	0.11065	0.153775				84.4	0.0981764	0.0914402
			84.5	0.11065	0.154817				84.5	0.100117	0.0914402
			84.6	0.115097	0.154817				84.6	0.0981764	0.0914402
			84.7	0.112874	0.154817				84.7	0.101087	0.0881936
			84.8	0.115097	0.153775				84.8	0.100117	0.0925224
			84.9	0.11065	0.153775				84.9	0.101087	0.0936046
			85	0.111762	0.155858				85	0.101087	0.090358
			85.1	0.113986	0.155858				85.1	0.103028	0.0892758
			85.2	0.113986	0.1569				85.2	0.0991467	0.0892758
			85.3	0.112874	0.152734				85.3	0.100117	0.0881936
			85.4	0.112874	0.149609				85.4	0.097206	0.0925224
			85.5	0.112874	0.152734				85.5	0.101087	0.0881936
			85.6	0.111762	0.154817				85.6	0.0991467	0.0687143
			85.7	0.113986	0.155858				85.7	0.0991467	0.078454
			85.8	0.112874	0.154817				85.8	0.100117	0.090358
			85.9	0.116209	0.158983				85.9	0.101087	0.090358
			86	0.118433	0.160025				86	0.097206	0.0925224
			86.1	0.119544	0.1569				86.1	0.100117	0.0892758
			86.2	0.118433	0.152734				86.2	0.100117	0.0892758
			86.3	0.120656	0.153775				86.3	0.101087	0.0881936
			86.4	0.120656	0.152734				86.4	0.102058	0.090358
			86.5	0.116209	0.152734				86.5	0.103998	0.090358
			86.6	0.116209	0.154817				86.6	0.104969	0.0914402
			86.7	0.115097	0.153775				86.7	0.103998	0.0957689
			86.8	0.112874	0.1569				86.8	0.103028	0.090358
			86.9	0.109539	0.154817				86.9	0.104969	0.0741252
			87	0.109539	0.155858				87	0.105939	0.0741252
			87.1	0.115097	0.153775				87.1	0.105939	0.0881936
			87.2	0.112874	0.157941				87.2	0.104969	0.090358
			87.3	0.113986	0.155858				87.3	0.103998	0.0936046
			87.4	0.111762	0.157941				87.4	0.105939	0.0946867
			87.5	0.117321	0.1569				87.5	0.103998	0.0968511
			87.6	0.113986	0.158983				87.6	0.10788	0.0968511
			87.7	0.116209	0.160025				87.7	0.10885	0.0990155
			87.8	0.115097	0.158983				87.8	0.109821	0.0990155
			87.9	0.113986	0.160025				87.9	0.10691	0.10118
			88	0.115097	0.161066				88	0.10885	0.0979333
			88.1	0.111762	0.164191				88.1	0.10691	0.0979333
			88.2	0.113986	0.162108				88.2	0.105939	0.0925224
			88.3	0.112874	0.165232				88.3	0.104969	0.0968511
			88.4	0.115097	0.164191				88.4	0.10885	0.0968511
			88.5	0.113986	0.164191				88.5	0.109821	0.0968511
			88.6	0.116209	0.163149				88.6	0.10788	0.0892758
			88.7	0.115097	0.163149				88.7	0.10691	0.0925224
			88.8	0.113986	0.163149				88.8	0.109821	0.0914402
			88.9	0.117321	0.160025				88.9	0.10691	0.0925224
			89	0.115097	0.162108				89	0.103998	0.0914402
			89.1	0.120656	0.160025				89.1	0.0942949	0.0946867
			89.2	0.120656	0.165232				89.2	0.0962357	0.0925224
			89.3	0.118433	0.165232				89.3	0.104969	0.0925224
			89.4	0.119544	0.164191				89.4	0.103998	0.090358
			89.5	0.120656	0.162108				89.5	0.105939	0.0936046
			89.6	0.119544	0.162108				89.6	0.104969	0.0936046
			89.7	0.121768	0.166274				89.7	0.109821	0.0946867
			89.8	0.120656	0.166274				89.8	0.105939	0.0925224
			89.9	0.120656	0.166274				89.9	0.109821	0.0936046
			90	0.118433	0.165232				90	0.10885	0.0849471
			90.1	0.118433	0.165232				90.1	0.110791	0.0730431
			90.2	0.118433	0.163149				90.2	0.10788	0.0719609
			90.3	0.115097	0.167315				90.3	0.10885	0.0860293
			90.4	0.116209	0.167315				90.4	0.10691	0.0914402
			90.5	0.115097	0.166274				90.5	0.10885	0.0946867
			90.6	0.111762	0.167315				90.6	0.105939	0.0979333
			90.7	0.113986	0.166274				90.7	0.10885	0.0968511
			90.8	0.113986	0.166274				90.8	0.10788	0.0979333
			90.9	0.117321	0.167315				90.9	0.111761	0.0990155
			91	0.117321	0.169399				91	0.111761	0.102262
			91.1	0.119544	0.167315				91.1	0.109821	0.0990155
			91.2	0.116209	0.167315				91.2	0.111761	0.0979333
			91.3	0.118433	0.165232				91.3	0.112732	0.0946867
			91.4	0.117321	0.168357				91.4	0.111761	0.0979333
			91.5	0.121768	0.169399				91.5	0.111761	0.0979333
			91.6	0.121768	0.168357				91.6	0.113702	0.10118
			91.7	0.123991	0.166274				91.7	0.115643	0.100098
			91.8	0.121768	0.166274				91.8	0.112732	0.102262
			91.9	0.123991	0.17044				91.9	0.115643	0.102262
			92	0.125103	0.17044				92	0.114672	0.104426
			92.1	0.125103	0.173565				92.1	0.111761	0.100098
			92.2	0.126215	0.172523				92.2	0.113702	0.0849471
			92.3	0.126215	0.172523				92.3	0.116613	0.0762896
			92.4	0.127327	0.169399				92.4	0.115643	0.0806184
			92.5	0.123991	0.173565				92.5	0.118554	0.0827827
			92.6	0.127327	0.172523				92.6	0.119524	0.0914402
			92.7	0.126215	0.172523				92.7	0.121465	0.0946867
			92.8	0.126215	0.17044				92.8	0.112732	0.0968511
			92.9	0.128438	0.171482				92.9	0.112732	0.0946867
			93	0.126215	0.172523				93	0.10788	0.10118
			93.1	0.12288	0.173565				93.1	0.111761	0.10118
			93.2	0.121768	0.176689				93.2	0.114672	0.102262
			93.3	0.121768	0.175648				93.3	0.118554	0.100098
			93.4	0.119544	0.177731				93.4	0.116613	0.103344
			93.5	0.12288	0.176689				93.5	0.116613	0.105509
			93.6	0.123991	0.178773				93.6	0.114672	0.107673
			93.7	0.127327	0.177731				93.7	0.118554	0.106591
			93.8	0.127327	0.181897				93.8	0.117583	0.105509
			93.9	0.125103	0.180856				93.9	0.118554	0.103344
			94	0.123991	0.185022				94	0.114672	0.104426
			94.1	0.12288	0.18398				94.1	0.118554	0.106591
			94.2	0.127327	0.181897				94.2	0.120494	0.107673
			94.3	0.127327	0.180856				94.3	0.126317	0.108755
			94.4	0.128438	0.181897				94.4	0.123406	0.104426
			94.5	0.126215	0.182939				94.5	0.126317	0.104426
			94.6	0.123991	0.180856				94.6	0.117583	0.104426
			94.7	0.121768	0.18398				94.7	0.120494	0.107673
			94.8	0.119544	0.18398				94.8	0.120494	0.105509
			94.9	0.120656	0.181897				94.9	0.125346	0.105509
			95	0.119544	0.177731				95	0.122435	0.103344
			95.1	0.120656	0.179814				95.1	0.124376	0.103344
			95.2	0.121768	0.179814				95.2	0.122435	0.105509
			95.3	0.125103	0.177731				95.3	0.122435	0.106591
			95.4	0.125103	0.178773				95.4	0.124376	0.107673
			95.5	0.127327	0.179814				95.5	0.124376	0.107673
			95.6	0.12288	0.181897				95.6	0.122435	0.108755
			95.7	0.12288	0.181897				95.7	0.126317	0.105509
			95.8	0.12288	0.185022				95.8	0.123406	0.106591
			95.9	0.126215	0.181897				95.9	0.121465	0.110919
			96	0.123991	0.181897				96	0.122435	0.107673
			96.1	0.125103	0.177731				96.1	0.119524	0.104426
			96.2	0.126215	0.177731				96.2	0.119524	0.103344
			96.3	0.123991	0.178773				96.3	0.121465	0.103344
			96.4	0.128438	0.180856				96.4	0.122435	0.102262
			96.5	0.125103	0.182939				96.5	0.121465	0.106591
			96.6	0.128438	0.187105				96.6	0.122435	0.105509
			96.7	0.128438	0.186063				96.7	0.124376	0.106591
			96.8	0.132885	0.18398				96.8	0.122435	0.106591
			96.9	0.12955	0.188147				96.9	0.125346	0.106591
			97	0.131774	0.18398				97	0.125346	0.106591
			97.1	0.130662	0.188147				97.1	0.127287	0.108755
			97.2	0.128438	0.186063				97.2	0.127287	0.108755
			97.3	0.128438	0.187105				97.3	0.129228	0.108755
			97.4	0.127327	0.18398				97.4	0.126317	0.109837
			97.5	0.127327	0.186063				97.5	0.129228	0.106591
			97.6	0.126215	0.18398				97.6	0.129228	0.0990155
			97.7	0.12955	0.186063				97.7	0.134079	0.0827827
			97.8	0.12955	0.186063				97.8	0.128257	0.0838649
			97.9	0.130662	0.188147				97.9	0.126317	0.0914402
			98	0.132885	0.19023				98	0.123406	0.10118
			98.1	0.130662	0.19023				98.1	0.125346	0.104426
			98.2	0.125103	0.191271				98.2	0.124376	0.107673
			98.3	0.12288	0.193354				98.3	0.125346	0.105509
			98.4	0.12955	0.189188				98.4	0.128257	0.108755
			98.5	0.130662	0.18398				98.5	0.129228	0.107673
			98.6	0.132885	0.18398				98.6	0.131168	0.108755
			98.7	0.131774	0.182939				98.7	0.129228	0.112002
			98.8	0.135109	0.186063				98.8	0.129228	0.112002
			98.9	0.133997	0.18398				98.9	0.132139	0.113084
			99	0.136221	0.188147				99	0.132139	0.110919
			99.1	0.137332	0.187105				99.1	0.133109	0.113084
			99.2	0.133997	0.192313				99.2	0.131168	0.110919
			99.3	0.133997	0.186063				99.3	0.134079	0.113084
			99.4	0.130662	0.189188				99.4	0.134079	0.113084
			99.5	0.132885	0.191271				99.5	0.137961	0.114166
			99.6	0.131774	0.192313				99.6	0.134079	0.112002
			99.7	0.131774	0.19023				99.7	0.13602	0.115248
			99.8	0.12955	0.19023				99.8	0.133109	0.113084
			99.9	0.131774	0.188147				99.9	0.13699	0.114166
			100	0.136221	0.192313				100	0.132139	0.112002
			100.1	0.133997	0.195437				100.1	0.131168	0.110919
			100.2	0.133997	0.194396				100.2	0.133109	0.115248
			100.3	0.132885	0.194396				100.3	0.13602	0.110919
			100.4	0.135109	0.193354				100.4	0.132139	0.113084
			100.5	0.138444	0.196479				100.5	0.13699	0.113084
			100.6	0.141779	0.195437				100.6	0.13505	0.115248
			100.7	0.140668	0.196479				100.7	0.13505	0.113084
			100.8	0.142891	0.192313				100.8	0.13505	0.117413
			100.9	0.142891	0.192313				100.9	0.13699	0.117413
			101	0.142891	0.192313				101	0.133109	0.118495
			101.1	0.145115	0.196479				101.1	0.13505	0.11633
			101.2	0.145115	0.195437				101.2	0.134079	0.113084
			101.3	0.144003	0.195437				101.3	0.137961	0.11633
			101.4	0.139556	0.196479				101.4	0.139902	0.113084
			101.5	0.146226	0.195437				101.5	0.13699	0.11633
			101.6	0.146226	0.197521				101.6	0.137961	0.117413
			101.7	0.144003	0.196479				101.7	0.140872	0.118495
			101.8	0.140668	0.198562				101.8	0.138931	0.114166
			101.9	0.141779	0.193354				101.9	0.13699	0.118495
			102	0.142891	0.199604				102	0.133109	0.117413
			102.1	0.145115	0.197521				102.1	0.139902	0.118495
			102.2	0.146226	0.199604				102.2	0.137961	0.11633
			102.3	0.144003	0.197521				102.3	0.137961	0.11633
			102.4	0.144003	0.199604				102.4	0.132139	0.11633
			102.5	0.144003	0.197521				102.5	0.133109	0.117413
			102.6	0.146226	0.199604				102.6	0.13699	0.117413
			102.7	0.144003	0.199604				102.7	0.138931	0.117413
			102.8	0.147338	0.197521				102.8	0.13602	0.117413
			102.9	0.145115	0.194396				102.9	0.13505	0.117413
			103	0.144003	0.193354				103	0.13505	0.117413
			103.1	0.141779	0.197521				103.1	0.13602	0.118495
			103.2	0.138444	0.198562				103.2	0.137961	0.119577
			103.3	0.142891	0.201687				103.3	0.13505	0.118495
			103.4	0.141779	0.199604				103.4	0.13505	0.119577
			103.5	0.145115	0.201687				103.5	0.13699	0.117413
			103.6	0.144003	0.199604				103.6	0.13602	0.120659
			103.7	0.146226	0.202728				103.7	0.132139	0.115248
			103.8	0.147338	0.200645				103.8	0.13505	0.119577
			103.9	0.145115	0.202728				103.9	0.13602	0.121741
			104	0.14845	0.202728				104	0.13699	0.119577
			104.1	0.14845	0.20377				104.1	0.133109	0.120659
			104.2	0.150673	0.20377				104.2	0.13602	0.120659
			104.3	0.146226	0.204811				104.3	0.137961	0.119577
			104.4	0.146226	0.202728				104.4	0.13699	0.119577
			104.5	0.145115	0.204811				104.5	0.133109	0.122824
			104.6	0.146226	0.204811				104.6	0.134079	0.118495
			104.7	0.14845	0.208978				104.7	0.13505	0.122824
			104.8	0.150673	0.211061				104.8	0.134079	0.121741
			104.9	0.152897	0.238141				104.9	0.13699	0.127152
			105	0.151785	0.246474				105	0.13699	0.121741
			105.1	0.151785	0.246474				105.1	0.140872	0.122824
			105.2	0.149562	0.387084				105.2	0.139902	0.121741
			105.3	0.156232	0.483948				105.3	0.142813	0.122824
			105.4	0.152897	0.579771				105.4	0.138931	0.123906
			105.5	0.152897	0.677678				105.5	0.139902	0.122824
			105.6	0.152897	0.788083				105.6	0.139902	0.123906
			105.7	0.152897	0.888072				105.7	0.139902	0.122824
			105.8	0.156232	0.923485				105.8	0.140872	0.121741
			105.9	0.156232	0.941191				105.9	0.140872	0.120659
			106	0.159567	0.957856				106	0.139902	0.123906
			106.1	0.156232	0.960981				106.1	0.139902	0.121741
			106.2	0.158456	0.964105				106.2	0.138931	0.122824
			106.3	0.158456	0.959939				106.3	0.138931	0.122824
			106.4	0.158456	0.959939				106.4	0.143783	0.123906
			106.5	0.154009	0.962022				106.5	0.138931	0.119577
			106.6	0.154009	0.965147				106.6	0.139902	0.120659
			106.7	0.152897	0.963064				106.7	0.137961	0.121741
			106.8	0.15512	0.966189				106.8	0.138931	0.122824
			106.9	0.152897	0.968272				106.9	0.13699	0.123906
			107	0.152897	0.972438				107	0.140872	0.12607
			107.1	0.154009	0.973479				107.1	0.139902	0.122824
			107.2	0.154009	0.975563				107.2	0.141842	0.123906
			107.3	0.15512	0.975563				107.3	0.140872	0.123906
			107.4	0.151785	0.977646				107.4	0.141842	0.124988
			107.5	0.154009	0.975563				107.5	0.142813	0.127152
			107.6	0.15512	0.973479				107.6	0.141842	0.123906
			107.7	0.154009	0.976604				107.7	0.141842	0.12607
			107.8	0.154009	0.977646				107.8	0.140872	0.123906
			107.9	0.156232	0.984937				107.9	0.142813	0.128234
			108	0.160679	0.984937				108	0.140872	0.127152
			108.1	0.158456	0.988061				108.1	0.143783	0.131481
			108.2	0.159567	0.982853				108.2	0.144753	0.129317
			108.3	0.15512	0.98702				108.3	0.146694	0.132563
			108.4	0.157344	0.981812				108.4	0.182597	0.128234
			108.5	0.15512	0.981812				108.5	0.333002	0.129317
			108.6	0.158456	0.988061				108.6	0.228204	0.122824
			108.7	0.157344	0.995352				108.7	0.177745	0.127152
			108.8	0.159567	0.999518				108.8	0.21753	0.12607
			108.9	0.159567	0.998477				108.9	0.299039	0.127152
			109	0.15512	1.0016				109	0.435859	0.127152
			109.1	0.15512	1.00264				109.1	0.693973	0.12607
			109.2	0.151785	0.998477				109.2	0.819148	0.128234
			109.3	0.154009	0.997435				109.3	0.882221	0.127152
			109.4	0.15512	0.998477				109.4	0.93365	0.130399
			109.5	0.158456	0.996394				109.5	0.937531	0.128234
			109.6	0.15512	1.00056				109.6	0.949175	0.129317
			109.7	0.157344	0.998477				109.7	0.954997	0.127152
			109.8	0.156232	0.996394				109.8	0.96276	0.130399
			109.9	0.158456	0.995352				109.9	0.959849	0.127152
			110	0.159567	0.999518				110	0.964701	0.130399
			110.1	0.159567	0.997435				110.1	0.96179	0.129317
			110.2	0.160679	1.0016				110.2	0.963731	0.130399
			110.3	0.159567	1.00056				110.3	0.966642	0.12607
			110.4	0.161791	1.0016				110.4	0.969553	0.127152
			110.5	0.156232	1.00264				110.5	0.973434	0.12607
			110.6	0.157344	1.01202				110.6	0.971493	0.128234
			110.7	0.157344	1.01202				110.7	0.975375	0.127152
			110.8	0.161791	1.00577				110.8	0.974404	0.128234
			110.9	0.160679	1.00473				110.9	0.981197	0.129317
			111	0.161791	1.00681				111	0.981197	0.128234
			111.1	0.164014	1.01098				111.1	0.983138	0.128234
			111.2	0.161791	1.00993				111.2	0.985078	0.128234
			111.3	0.161791	1.01202				111.3	0.992841	0.131481
			111.4	0.162903	1.00681				111.4	0.991871	0.128234
			111.5	0.165126	1.00889				111.5	0.991871	0.130399
			111.6	0.166238	1.00577				111.6	0.98993	0.130399
			111.7	0.166238	1.00889				111.7	0.993811	0.130399
			111.8	0.16735	1.01098				111.8	0.994782	0.130399
			111.9	0.166238	1.0141				111.9	0.995752	0.132563
			112	0.164014	1.00993				112	0.998663	0.130399
			112.1	0.159567	1.00681				112.1	0.993811	0.131481
			112.2	0.162903	1.00681				112.2	0.995752	0.130399
			112.3	0.165126	1.00889				112.3	0.998663	0.130399
			112.4	0.16735	1.00785				112.4	1.00157	0.131481
			112.5	0.166238	1.00264				112.5	1.00157	0.133645
			112.6	0.16735	1.00264				112.6	1.0006	0.136892
			112.7	0.16735	1.00056				112.7	0.995752	0.13581
			112.8	0.170685	1.00368				112.8	0.996723	0.134728
			112.9	0.16735	1.00681				112.9	0.997693	0.132563
			113	0.169573	1.00473				113	1.00254	0.133645
			113.1	0.16735	1.00368				113.1	0.998663	0.127152
			113.2	0.166238	1.00785				113.2	0.994782	0.105509
			113.3	0.162903	1.00056				113.3	0.994782	0.104426
			113.4	0.161791	1.0016				113.4	1.0006	0.120659
			113.5	0.162903	1.00264				113.5	1.00449	0.121741
			113.6	0.165126	1.0016				113.6	1.0074	0.128234
			113.7	0.165126	0.998477				113.7	1.00546	0.127152
			113.8	0.161791	1.00368				113.8	1.00546	0.131481
			113.9	0.162903	1.00681				113.9	1.00352	0.131481
			114	0.162903	1.00681				114	1.00254	0.133645
			114.1	0.164014	1.00889				114.1	1.00837	0.133645
			114.2	0.162903	1.00681				114.2	1.00837	0.136892
			114.3	0.166238	1.00577				114.3	1.00546	0.13581
			114.4	0.161791	1.00473				114.4	1.00157	0.132563
			114.5	0.165126	1.0016				114.5	1.00352	0.134728
			114.6	0.164014	0.997435				114.6	1.00449	0.132563
			114.7	0.164014	1.0016				114.7	1.00837	0.133645
			114.8	0.164014	1.00264				114.8	1.01128	0.13581
			114.9	0.166238	1.00889				114.9	1.01225	0.136892
			115	0.171797	1.00993				115	1.01225	0.136892
			115.1	0.169573	1.00577				115.1	1.00837	0.137974
			115.2	0.170685	1.0016				115.2	1.00546	0.137974
			115.3	0.166238	1.00473				115.3	1.00643	0.137974
			115.4	0.169573	1.00889				115.4	1.0074	0.136892
			115.5	0.169573	1.00785				115.5	1.00837	0.136892
			115.6	0.170685	1.00993				115.6	1.00643	0.141221
			115.7	0.169573	1.00473				115.7	1.00254	0.137974
			115.8	0.168461	1.00056				115.8	1.00449	0.140138
			115.9	0.16735	0.999518				115.9	1.00157	0.137974
			116	0.16735	1.00056				116	1.00643	0.140138
			116.1	0.172908					116.1	1.00643	0.142303
			116.2	0.171797					116.2	1.0074	0.142303
			116.3	0.17402					116.3	1.00934	0.139056
			116.4	0.172908					116.4	1.01128	0.141221
			116.5	0.171797					116.5	1.00449	0.139056
			116.6	0.170685					116.6	1.00352	0.137974
			116.7	0.17402					116.7	1.00254	0.141221
			116.8	0.175132					116.8	1.00643	0.140138
			116.9	0.175132					116.9	1.00449	0.141221
			117	0.177355					117	1.0074	0.141221
			117.1	0.175132					117.1	1.00643	0.143385
			117.2	0.175132					117.2	1.00254	0.136892
			117.3	0.17402					117.3	1.00352	0.141221
			117.4	0.172908					117.4	1.00546	0.123906
			117.5	0.172908					117.5	1.00643	0.114166
			117.6	0.175132					117.6	1.00449	0.114166
			117.7	0.170685					117.7	1.00546	0.120659
			117.8	0.170685					117.8	1.00546	0.128234
			117.9	0.165126					117.9	1.0074	0.133645
			118	0.166238					118	1.0074	0.134728
			118.1	0.166238					118.1	1.00546	0.140138
			118.2	0.166238					118.2	1.00449	0.140138
			118.3	0.165126					118.3	1.00643	0.139056
			118.4	0.164014					118.4	1.00643	0.141221
			118.5	0.162903					118.5	1.0074	0.136892
			118.6	0.164014					118.6	1.01031	0.142303
			118.7	0.16735					118.7	1.00837	0.141221
			118.8	0.168461					118.8	1.00352	0.144467
			118.9	0.169573					118.9	1.00254	0.143385
			119	0.168461					119	1.00643	0.143385
			119.1	0.168461					119.1	1.0074	0.139056
			119.2	0.16735					119.2	1.00643	0.142303
			119.3	0.172908					119.3	1.00157	0.144467
			119.4	0.172908					119.4	1.00352	0.142303
			119.5	0.168461					119.5	1.00352	0.142303
			119.6	0.165126					119.6	1.00546	0.144467
			119.7	0.168461					119.7	1.00643	0.145549
			119.8	0.168461					119.8	1.00837	0.143385
			119.9	0.170685					119.9	1.00449	0.147714
			120	0.169573					120	1.00352	0.145549
			120.1	0.165126					120.1	1.0006	0.145549
			120.2	0.169573					120.2	1.00157	0.144467
			120.3	0.168461					120.3	1.00546	0.145549
			120.4	0.169573					120.4	1.00352	0.142303
			120.5	0.16735					120.5	1.00546	0.145549
			120.6	0.171797					120.6	1.00546	0.143385
			120.7	0.16735					120.7	1.00837	0.145549
			120.8	0.16735					120.8	1.0074	0.142303
			120.9	0.16735					120.9	1.01031	0.145549
			121	0.166238					121	1.0074	0.140138
			121.1	0.168461					121.1	1.0074	0.144467
			121.2	0.169573					121.2	1.00643	0.128234
			121.3	0.170685					121.3	1.0074	0.119577
			121.4	0.169573					121.4	1.00352	0.11633
			121.5	0.170685					121.5	1.00546	0.120659
			121.6	0.165126					121.6	1.00449	0.129317
			121.7	0.168461					121.7	1.00643	0.137974
			121.8	0.169573					121.8	1.00352	0.139056
			121.9	0.17402					121.9	1.00254	0.140138
			122	0.171797					122	1.0006	0.145549
			122.1	0.17402							0.134728
			122.2	0.172908							0.129317
			122.3	0.170685							0.12607
			122.4	0.170685							0.129317
			122.5	0.171797							0.128234
			122.6	0.17402							0.136892
			122.7	0.175132							0.137974
			122.8	0.177355							0.140138
			122.9	0.175132							0.136892
			123	0.176244							0.143385
			123.1	0.175132							0.132563
			123.2	0.176244							0.129317
			123.3	0.171797							0.131481
			123.4	0.172908							0.131481
			123.5	0.17402							0.136892
			123.6	0.178467							0.141221
			123.7	0.180691							0.134728
			123.8	0.178467							0.127152
			123.9	0.181802							0.129317
			124	0.181802							0.123906
			124.1	0.185138							0.12607
			124.2	0.185138							0.127152
			124.3	0.190697							0.134728
			124.4	0.187361							0.133645
			124.5	0.21182							0.130399
			124.6	0.23739							0.128234
			124.7	0.284084							0.134728
			124.8	0.441952							0.137974
			124.9	0.495316							0.144467
			125	0.606492							0.145549
			125.1	0.804383							0.147714
			125.2	0.91667							0.148796
			125.3	0.956693							0.147714
			125.4	0.962252							0.145549
			125.5	0.964476							0.134728
			125.6	0.971146							0.132563
			125.7	0.975593							0.129317
			125.8	0.977817							0.142303
			125.9	0.975593							0.143385
			126	0.981152							0.146632
			126.1	0.982264							0.144467
			126.2	0.987822							0.145549
			126.3	0.988934							0.147714
			126.4	0.993381							0.148796
			126.5	0.987822							0.147714
			126.6	0.991158							0.149878
			126.7	0.988934							0.147714
			126.8	0.993381							0.15096
			126.9	0.994493							0.154207
			127	0.994493							0.149878
			127.1	1.00116							0.15096
			127.2	1.00116							0.149878
			127.3	1.00561							0.144467
			127.4	1.00339							0.134728
			127.5	1.00339							0.134728
			127.6	1.00228							0.139056
			127.7	1.00561							0.145549
			127.8	1.00672							0.152042
			127.9	1.00895							0.153125
			128	1.00783							0.15096
			128.1	1.01339							0.152042
			128.2	1.01784							0.154207
			128.3	1.01339							0.153125
			128.4	1.01006							0.156371
			128.5	1.01228							0.153125
			128.6	1.01562							0.155289
			128.7	1.0145							0.154207
			128.8	1.01117							0.157453
			128.9	1.00783							0.156371
			129	1.01117							0.1607
			129.1	1.01673							0.159618
			129.2	1.02117							0.159618
			129.3	1.01562							0.158536
			129.4	1.00672							0.157453
			129.5	1.00895							0.158536
			129.6	1.00672							0.159618
			129.7	1.01339							0.153125
			129.8	1.01228							0.140138
			129.9	1.01228							0.141221
			130	1.00895							0.15096
			130.1	1.0145							0.155289
			130.2	1.01228							0.156371
			130.3	1.01895							0.157453
			130.4	1.0234							0.15096
			130.5	1.0234							0.142303
			130.6	1.02117							0.139056
			130.7	1.01673							0.147714
			130.8	1.01784							0.15096
			130.9	1.01673							0.153125
			131	1.02006							0.155289
			131.1	1.02006							0.156371
			131.2	1.02229							0.161782
			131.3	1.02006							0.161782
			131.4	1.02229							0.173686
			131.5	1.02006							0.174768
			131.6	1.02451							0.162864
			131.7	1.02451							0.21048
			131.8	1.02562							0.692052
			131.9	1.02562							0.743997
			132	1.02785							0.672573
			132.1	1.02673							0.636861
			132.2	1.02451							0.713696
			132.3	1.02229							0.791613
			132.4	1.02117							0.886845
			132.5	1.02451							0.925804
			132.6	1.02451							0.934461
			132.7	1.03007							0.944201
			132.8	1.02673							0.949612
			132.9	1.03007							0.955023
			133	1.02451							0.956105
			133.1	1.0234							0.960434
			133.2	1.01895							0.959351
			133.3	1.02229							0.96368
			133.4	1.02117							0.96368
			133.5	1.02896							0.965845
			133.6	1.03229							0.964762
			133.7	1.03563							0.966927
			133.8	1.03118							0.965845
			133.9	1.02785							0.965845
			134	1.0234							0.969091
			134.1	1.02229							0.974502
			134.2	1.02451							0.982077
			134.3	1.02673							0.980995
			134.4	1.0334							0.978831
			134.5	1.03674							0.977749
			134.6	1.03452							0.982077
			134.7	1.03563							0.980995
			134.8	1.03452							0.978831
			134.9	1.03452							0.977749
			135	1.04119							0.978831
			135.1	1.04452							0.975584
			135.2	1.05119							0.979913
			135.3	1.05786							0.983159
			135.4	1.06676							0.98857
			135.5	1.0712							0.985324
			135.6	1.06342							0.980995
			135.7	1.05342							0.980995
			135.8	1.04786							0.979913
			135.9	1.04897							0.982077
			136	1.04786							0.980995
			136.1	1.05342							0.986406
			136.2	1.0523							0.98857
			136.3	1.05564							0.992899
			136.4	1.05453							0.991817
			136.5	1.05564							0.995064
			136.6	1.05119							0.992899
			136.7	1.04897							0.993981
			136.8	1.04341							0.990735
			136.9	1.0423							0.991817
			137	1.04786							0.992899
			137.1	1.04675							0.995064
			137.2	1.04786							0.997228
			137.3	1.03896							0.99831
			137.4	1.03007							0.99831
			137.5	1.02785							1.00156
			137.6	1.03674							0.999392
			137.7	1.03896							0.999392
			137.8	1.04007							1.00047
			137.9	1.03452							0.995064
			138	1.03674							0.997228
			138.1	1.03896							0.997228
			138.2	1.04119							0.999392
			138.3	1.0334							0.99831
			138.4	1.02785							1.00264
			138.5	1.02451							1.00047
			138.6	1.0234							0.999392
			138.7	1.02451							0.99831
			138.8	1.02673							0.995064
			138.9	1.02785							0.996146
			139	1.02229							0.995064
			139.1	1.02562							0.997228
			139.2	1.02229							0.999392
			139.3	1.02229							1.00156
			139.4	1.01895							0.997228
			139.5	1.02673							0.999392
			139.6	1.02896							0.99831
			139.7	1.0234							0.999392
			139.8	1.01895							0.999392
			139.9	1.02229							0.997228
			140	1.02229							0.999392
			140.1	1.02229							0.999392
			140.2	1.0234							0.999392
			140.3	1.02117							0.997228
			140.4	1.0234							1.00264
			140.5	1.02229							1.00156
			140.6	1.02117							1.00047
			140.7	1.02673							0.997228
			140.8	1.02673							0.99831
			140.9	1.02673							0.996146
			141	1.03118							0.997228
			141.1	1.04007							0.995064
			141.2	1.03896							0.993981
			141.3	1.03896							0.996146
			141.4	1.03896							0.996146
			141.5	1.0423							0.996146
			141.6	1.0423							0.99831
			141.7	1.04675							0.996146
			141.8	1.0423							0.996146
			141.9	1.03007							0.996146
			142	1.02229							0.99831
			142.1	1.02117							0.997228
			142.2	1.01784							0.997228
			142.3	1.01784							0.997228
			142.4	1.01784							0.991817
			142.5	1.01562							0.993981
			142.6	1.01673							0.993981
			142.7	1.01673							0.993981
			142.8	1.01562							0.990735
			142.9	1.01562							0.991817
			143	1.01562							0.989653
			143.1	1.01117							0.995064
			143.2	1.01117							0.992899
			143.3	1.00672							0.996146
			143.4	1.00895							0.995064
			143.5	1.00561							0.99831
			143.6	1.01006							0.995064
			143.7	1.00783							0.995064
			143.8	1.00672							0.992899
			143.9	1.00561							0.996146
			144	1.00895							0.993981
			144.1	1.00339							0.995064
			144.2	1.0045							0.992899
			144.3	1.0045							0.993981
			144.4	1.00561							0.99831
			144.5	1.0045							0.997228
			144.6	1.0045							0.997228
			144.7	1.00561							0.996146
			144.8	1.00228							0.999392
			144.9	1.00339							0.996146
			145	1.00228							1.00047
			145.1	1.00116							0.997228
			145.2	1.00116							1.00047
			145.3	1.0045							0.99831
			145.4	1.00672							0.99831
			145.5	1.00895							0.995064
			145.6	1.00672							0.997228
			145.7	1.00783							0.997228
			145.8	1.00672							0.99831
			145.9	1.00561							1.00047
			146	1.00561							0.993981
			146.1	1.0045							0.993981
			146.2	1.00561							0.990735
			146.3	1.0045							0.996146
			146.4	1.00672							0.996146
			146.5	1.00672							1.00372
			146.6	1.00783							1.00047
			146.7	1.00561							0.999392
			146.8	1.00561							0.995064
			146.9	1.00228							0.995064
			147	1.00561							0.996146
			147.1	1.0045							0.996146
			147.2	1.00672							0.996146
			147.3	1.00339							0.991817
			147.4	1.0045							0.993981
			147.5	1.00228							0.997228
			147.6	1.00116							0.996146
			147.7	1.00339							0.991817
			147.8	1.00339							0.995064
			147.9	1.00228							0.991817
			148	1.00005							0.992899
			148.1	1.00005							0.993981
			148.2	0.997828							0.997228
			148.3	1.00116							0.995064
			148.4	0.997828							0.993981
			148.5	1.00005							0.997228
			148.6	1.00005							0.995064
											0.991817
											0.992899
											0.993981
											0.992899
											0.99831
											0.995064
											0.996146
											0.993981
											0.991817
											0.990735
											0.991817
											0.990735
											0.993981
											0.993981
											0.992899
											0.992899
											0.992899
											0.996146
											0.995064
											0.996146
											1.00047
											1.0048
											1.00047
											1.00372
											0.999392
											0.997228
											0.997228
											0.997228
											0.99831
											1.00047
											0.999392
											0.995064
											0.989653
											0.989653
											0.992899
											0.991817
											0.992899
											0.992899
											0.992899
											0.991817
											0.991817
											0.98857
											0.990735
											0.989653
											0.993981
											0.993981
											0.995064
											0.993981
											0.996146
											0.992899
											0.989653
											0.991817
											0.990735
											0.990735
											0.989653
											0.990735
											0.992899
											0.99831
											0.995064
											0.997228
											0.993981
											0.997228
											0.993981
											0.993981
											0.993981
											0.996146
											0.99831
											0.996146
											0.99831
											0.995064
											0.99831
											0.996146
											0.996146
											0.997228
											1.00047
											0.999392
											1.00372
											1.00372
											1.00156
											0.997228
											0.99831
											0.997228
											0.999392
											1.00156
											0.99831
											0.997228
											0.992899
											0.98857
											0.986406
											0.990735
											0.990735
											0.995064
											0.996146
											1.00156
											1.00047
											1.00372
											0.99831
											1.00047
