# Supplementary material for: The fluoride permeation pathway and anion recognition in Fluc family fluoride channels
Source: eLife. 2021 Jul 12;10:e69482. doi: 10.7554/eLife.69482 (PMC8315801; doi:10.7554/eLife.69482)
Supplement: Figure 3—source data 1. [file elife-69482-fig3-data1.xlsx]

## Sheet: Sheet1
single channel conductances (expressed as pA measured at -200 mV)
Y104F	T39S	WT	E88Q	E88D
1.4	1	1.5	0.34	1.5
1.2	1.1	1.5	0.42	1.6
1.25	1.05	1.2	0.74	1.4
1.15	1.04	1.4	0.4	1.5
1.15	1.15	1.4	0.45	1.6
1.58	1	1.4	0.36	1.7
1.2	1.1	1.3	0.47	1.45
1.15	1.25	1.5	0.52	1.4
1.07	1.35	1.6	0.39	1.01
1.27	0.8	1.25	0.41
1.19	0.75	1.35	0.45
	1.4	1.3	0.32
	1.05	1.55
		1.3
		1.5
		1.2
		1.4
	prepA
	prepB
