# Supplementary material for: The fluoride permeation pathway and anion recognition in Fluc family fluoride channels
Source: eLife. 2021 Jul 12;10:e69482. doi: 10.7554/eLife.69482 (PMC8315801; doi:10.7554/eLife.69482)
Supplement: Figure 3—source data 2. [file elife-69482-fig3-data2.xlsx]

## Sheet: Sheet1
			0	-1.36909	Bpe-T39S			599.67	-1.5716	Bpe-Y104F
single channel traces			0.001	-1.3719	inset			599.675	-1.66902	inset
			0.002	-1.37485				599.68	-1.5915
			0.003	-1.37789				599.685	-1.57393
			0.004	-1.38095				599.69	-1.60501
			0.005	-1.384				599.695	-1.43128
			0.006	-1.38697				599.7	-1.51965
			0.007	-1.38983				599.705	-1.69471
			0.008	-1.39254				599.71	-1.55563
			0.009	-1.39507				599.715	-1.60685
			0.01	-1.3974				599.72	-1.5463
			0.011	-1.39952				599.725	-1.4878
			0.012	-1.40143				599.73	-1.67227
			0.013	-1.40312				599.735	-1.58731
			0.014	-1.4046				599.74	-1.51264
			0.015	-1.40588				599.745	-1.5819
			0.016	-1.40699				599.75	-1.5817
			0.017	-1.40796				599.755	-1.63763
			0.018	-1.40882				599.76	-1.57436
			0.019	-1.40962				599.765	-1.47605
			0.02	-1.41037				599.77	-1.51126
			0.021	-1.41113				599.775	-1.48311
			0.022	-1.41193				599.78	-1.53332
			0.023	-1.4128				599.785	-1.44964
			0.024	-1.41379				599.79	-1.42844
			0.025	-1.41492				599.795	-1.56211
			0.026	-1.4162				599.8	-1.56515
			0.027	-1.41765				599.805	-1.54882
			0.028	-1.41928				599.81	-1.5042
			0.029	-1.42108				599.815	-1.51144
			0.03	-1.42304				599.82	-1.43682
			0.031	-1.42514				599.825	-1.515
			0.032	-1.42736				599.83	-1.50272
			0.033	-1.42968				599.835	-1.66966
			0.034	-1.43205				599.84	-1.40774
			0.035	-1.43443				599.845	-1.47723
			0.036	-1.43679				599.85	-1.45319
			0.037	-1.43908				599.855	-1.52081
			0.038	-1.44125				599.86	-1.51043
			0.039	-1.44328				599.865	-1.49014
			0.04	-1.44512				599.87	-1.58893
			0.041	-1.44675				599.875	-1.50308
			0.042	-1.44815				599.88	-1.42359
			0.043	-1.44928				599.885	-1.41107
			0.044	-1.45015				599.89	-1.57441
			0.045	-1.45075				599.895	-1.53046
			0.046	-1.45111				599.9	-1.50406
			0.047	-1.45123				599.905	-1.55319
			0.048	-1.45113				599.91	-1.42198
			0.049	-1.45085				599.915	-1.44074
			0.05	-1.45042				599.92	-1.51039
			0.051	-1.44989				599.925	-1.58926
			0.052	-1.4493				599.93	-1.57779
			0.053	-1.44869				599.935	-1.41242
			0.054	-1.44812				599.94	-1.52922
			0.055	-1.44764				599.945	-1.54539
			0.056	-1.44729				599.95	-1.37166
			0.057	-1.44711				599.955	-1.60961
			0.058	-1.44713				599.96	-1.41282
			0.059	-1.44737				599.965	-1.51626
			0.06	-1.44787				599.97	-1.44279
			0.061	-1.44863				599.975	-1.54036
			0.062	-1.44964				599.98	-1.39458
			0.063	-1.45092				599.985	-1.29257
			0.064	-1.45245				599.99	-1.19866
			0.065	-1.4542				599.995	-0.731115
			0.066	-1.45615				600	-0.914321
			0.067	-1.45826				600.005	-0.997036
			0.068	-1.46052				600.01	-0.948114
			0.069	-1.46287				600.015	-1.5365
			0.07	-1.46528				600.02	-1.5399
			0.071	-1.4677				600.025	-1.2845
			0.072	-1.47009				600.03	-1.41345
			0.073	-1.47242				600.035	-1.27393
			0.074	-1.47467				600.04	-1.53244
			0.075	-1.4768				600.045	-1.67809
			0.076	-1.47878				600.05	-1.59511
			0.077	-1.48062				600.055	-1.53019
			0.078	-1.48229				600.06	-1.48198
			0.079	-1.48381				600.065	-1.49608
			0.08	-1.48519				600.07	-1.51885
			0.081	-1.48643				600.075	-1.60944
			0.082	-1.48757				600.08	-1.53366
			0.083	-1.48863				600.085	-1.61098
			0.084	-1.48964				600.09	-1.58576
			0.085	-1.49065				600.095	-1.35339
			0.086	-1.49169				600.1	-1.64528
			0.087	-1.49281				600.105	-1.39466
			0.088	-1.49404				600.11	-1.44083
			0.089	-1.49543				600.115	-1.6331
			0.09	-1.497				600.12	-1.61619
			0.091	-1.4988				600.125	-1.63484
			0.092	-1.50084				600.13	-1.51141
			0.093	-1.50317				600.135	-1.18292
			0.094	-1.50579				600.14	-0.881429
			0.095	-1.50872				600.145	-0.912827
			0.096	-1.51197				600.15	-0.81201
			0.097	-1.51552				600.155	-0.841488
			0.098	-1.51937				600.16	-0.887956
			0.099	-1.52349				600.165	-0.94317
			0.1	-1.52787				600.17	-0.817454
			0.101	-1.53247				600.175	-0.981757
			0.102	-1.53725				600.18	-0.893628
			0.103	-1.54216				600.185	-0.8138
			0.104	-1.54716				600.19	-1.01702
			0.105	-1.55219				600.195	-0.991318
			0.106	-1.55718				600.2	-0.971554
			0.107	-1.56208				600.205	-1.42883
			0.108	-1.56682				600.21	-1.59042
			0.109	-1.57135				600.215	-1.62231
			0.11	-1.57561				600.22	-1.71024
			0.111	-1.57953				600.225	-1.64484
			0.112	-1.58306				600.23	-1.49753
			0.113	-1.58615				600.235	-1.60167
			0.114	-1.58874				600.24	-1.80047
			0.115	-1.59079				600.245	-1.40972
			0.116	-1.59227				600.25	-1.5434
			0.117	-1.59315				600.255	-1.57142
			0.118	-1.5934				600.26	-1.505
			0.119	-1.59301				600.265	-1.58655
			0.12	-1.59197				600.27	-1.58117
			0.121	-1.59028				600.275	-1.70758
			0.122	-1.58795				600.28	-1.79821
			0.123	-1.58497				600.285	-1.66746
			0.124	-1.58138				600.29	-1.54151
			0.125	-1.57721				600.295	-1.5474
			0.126	-1.57249				600.3	-1.63874
			0.127	-1.56725				600.305	-1.49206
			0.128	-1.56152				600.31	-1.55908
			0.129	-1.55537				600.315	-1.50993
			0.13	-1.54883				600.32	-1.69667
			0.131	-1.54197				600.325	-1.50375
			0.132	-1.53484				600.33	-1.54146
			0.133	-1.5275				600.335	-1.52552
			0.134	-1.52002				600.34	-1.54781
			0.135	-1.51247				600.345	-1.53027
			0.136	-1.5049				600.35	-1.51845
			0.137	-1.49739				600.355	-1.57414
			0.138	-1.48998				600.36	-1.54438
			0.139	-1.48274				600.365	-1.66939
			0.14	-1.47573				600.37	-1.51529
			0.141	-1.469				600.375	-1.62528
			0.142	-1.46259				600.38	-1.48672
			0.143	-1.45657				600.385	-1.57658
			0.144	-1.45097				600.39	-1.54107
			0.145	-1.44581				600.395	-1.61081
			0.146	-1.44112				600.4	-1.56551
			0.147	-1.43692				600.405	-1.64427
			0.148	-1.43322				600.41	-1.52774
			0.149	-1.43003				600.415	-1.66359
			0.15	-1.42733				600.42	-1.55335
			0.151	-1.42512				600.425	-1.57232
			0.152	-1.42336				600.43	-1.67264
			0.153	-1.42203				600.435	-1.58048
			0.154	-1.42111				600.44	-1.62744
			0.155	-1.42055				600.445	-1.68959
			0.156	-1.42031				600.45	-1.63339
			0.157	-1.42033				600.455	-1.5943
			0.158	-1.42058				600.46	-1.54736
			0.159	-1.42098				600.465	-1.56427
			0.16	-1.4215				600.47	-1.56557
			0.161	-1.42209				600.475	-1.4969
			0.162	-1.4227				600.48	-1.54323
			0.163	-1.42328				600.485	-1.54374
			0.164	-1.4238				600.49	-1.5179
			0.165	-1.42421				600.495	-1.55894
			0.166	-1.42447				600.5	-1.60811
			0.167	-1.42456				600.505	-1.59077
			0.168	-1.42445				600.51	-1.61153
			0.169	-1.42412				600.515	-1.65048
			0.17	-1.42355				600.52	-1.51827
			0.171	-1.42272				600.525	-1.50107
			0.172	-1.42161				600.53	-1.5788
			0.173	-1.42023				600.535	-1.60181
			0.174	-1.41857				600.54	-1.64582
			0.175	-1.41662				600.545	-1.45852
			0.176	-1.41441				600.55	-1.64636
			0.177	-1.41193				600.555	-1.7475
			0.178	-1.4092				600.56	-1.70573
			0.179	-1.40621				600.565	-1.61799
			0.18	-1.403				600.57	-1.49928
			0.181	-1.39957				600.575	-1.56399
			0.182	-1.39594				600.58	-1.81638
			0.183	-1.39215				600.585	-1.40285
			0.184	-1.38823				600.59	-1.46152
			0.185	-1.38419				600.595	-1.66802
			0.186	-1.38009				600.6	-1.60988
			0.187	-1.37595				600.605	-1.63258
			0.188	-1.37181				600.61	-1.65284
			0.189	-1.36772				600.615	-1.61
			0.19	-1.36372				600.62	-1.65017
			0.191	-1.35984				600.625	-1.6349
			0.192	-1.35613				600.63	-1.62094
			0.193	-1.35263				600.635	-1.67562
			0.194	-1.34938				600.64	-1.25601
			0.195	-1.34642				600.645	-0.925397
			0.196	-1.34379				600.65	-0.949642
			0.197	-1.34151				600.655	-1.17645
			0.198	-1.33961				600.66	-1.63889
			0.199	-1.33812				600.665	-1.58765
			0.2	-1.33702				600.67	-1.51782
			0.201	-1.33635				600.675	-1.58512
			0.202	-1.33609				600.68	-1.53317
			0.203	-1.33626				600.685	-1.66557
			0.204	-1.33685				600.69	-1.48585
			0.205	-1.33782				600.695	-1.5836
			0.206	-1.33917				600.7	-1.60825
			0.207	-1.34086				600.705	-1.62117
			0.208	-1.34286				600.71	-1.50916
			0.209	-1.34513				600.715	-1.58144
			0.21	-1.34764				600.72	-1.58285
			0.211	-1.35035				600.725	-1.6076
			0.212	-1.35321				600.73	-1.54188
			0.213	-1.35616				600.735	-1.42496
			0.214	-1.35917				600.74	-1.63873
			0.215	-1.36217				600.745	-1.53307
			0.216	-1.36514				600.75	-1.55764
			0.217	-1.36803				600.755	-1.5015
			0.218	-1.37079				600.76	-1.68817
			0.219	-1.37341				600.765	-1.58425
			0.22	-1.37583				600.77	-1.58841
			0.221	-1.37805				600.775	-1.58367
			0.222	-1.38005				600.78	-1.64393
			0.223	-1.38181				600.785	-1.59562
			0.224	-1.38334				600.79	-1.46706
			0.225	-1.38465				600.795	-1.4435
			0.226	-1.38574				600.8	-1.69879
			0.227	-1.38663				600.805	-1.49771
			0.228	-1.38737				600.81	-1.62318
			0.229	-1.38796				600.815	-1.48088
			0.23	-1.38844				600.82	-1.59914
			0.231	-1.38885				600.825	-1.58884
			0.232	-1.38923				600.83	-1.4278
			0.233	-1.38962				600.835	-1.65423
			0.234	-1.39006				600.84	-1.4212
			0.235	-1.39059				600.845	-1.55129
			0.236	-1.39124				600.85	-1.55019
			0.237	-1.39203				600.855	-1.6758
			0.238	-1.39298				600.86	-1.56653
			0.239	-1.39411				600.865	-1.4335
			0.24	-1.39542				600.87	-1.47393
			0.241	-1.39691				600.875	-1.48326
			0.242	-1.39858				600.88	-1.52734
			0.243	-1.40041				600.885	-1.49638
			0.244	-1.40238				600.89	-1.65129
			0.245	-1.40447				600.895	-1.65043
			0.246	-1.40663				600.9	-1.53583
			0.247	-1.40883				600.905	-1.75175
			0.248	-1.41103				600.91	-1.64627
			0.249	-1.41317				600.915	-1.60818
			0.25	-1.41521				600.92	-1.6426
			0.251	-1.41712				600.925	-1.65432
			0.252	-1.41885				600.93	-1.6251
			0.253	-1.42035				600.935	-1.6397
			0.254	-1.42161				600.94	-1.34571
			0.255	-1.42257				600.945	-1.60519
			0.256	-1.42321				600.95	-1.68128
			0.257	-1.42352				600.955	-1.48096
			0.258	-1.42346				600.96	-1.65878
			0.259	-1.42305				600.965	-1.62322
			0.26	-1.42227				600.97	-1.56182
			0.261	-1.42113				600.975	-1.49047
			0.262	-1.41965				600.98	-1.5802
			0.263	-1.41784				600.985	-1.64721
			0.264	-1.41573				600.99	-1.68289
			0.265	-1.41335				600.995	-1.59959
			0.266	-1.41074				601	-1.48245
			0.267	-1.40793				601.005	-1.62791
			0.268	-1.40497				601.01	-1.60881
			0.269	-1.40191				601.015	-1.45112
			0.27	-1.39879				601.02	-1.63053
			0.271	-1.39568				601.025	-1.63116
			0.272	-1.39262				601.03	-1.45295
			0.273	-1.38967				601.035	-1.47508
			0.274	-1.38687				601.04	-1.57788
			0.275	-1.38428				601.045	-1.54093
			0.276	-1.38197				601.05	-1.56464
			0.277	-1.37997				601.055	-1.55707
			0.278	-1.37834				601.06	-1.72607
			0.279	-1.37714				601.065	-1.65435
			0.28	-1.3764				601.07	-1.57785
			0.281	-1.37615				601.075	-1.64415
			0.282	-1.37645				601.08	-1.61628
			0.283	-1.37734				601.085	-1.62759
			0.284	-1.37885				601.09	-1.72022
			0.285	-1.381				601.095	-1.54295
			0.286	-1.38384				601.1	-1.43322
			0.287	-1.38736				601.105	-1.73852
			0.288	-1.39159				601.11	-1.54813
			0.289	-1.39652				601.115	-1.59976
			0.29	-1.40215				601.12	-1.5797
			0.291	-1.40848				601.125	-1.60031
			0.292	-1.41548				601.13	-1.76872
			0.293	-1.42313				601.135	-1.52819
			0.294	-1.43137				601.14	-1.6558
			0.295	-1.44017				601.145	-1.65239
			0.296	-1.44945				601.15	-1.58939
			0.297	-1.45916				601.155	-1.61238
			0.298	-1.46921				601.16	-1.56217
			0.299	-1.47952				601.165	-1.54086
			0.3	-1.48999				601.17	-1.63666
			0.301	-1.50053				601.175	-1.43882
			0.302	-1.51104				601.18	-1.59284
			0.303	-1.5214				601.185	-1.6022
			0.304	-1.53153				601.19	-1.62839
			0.305	-1.54132				601.195	-1.65635
			0.306	-1.55067				601.2	-1.46464
			0.307	-1.55947				601.205	-1.60936
			0.308	-1.56764				601.21	-1.72081
			0.309	-1.57508				601.215	-1.54833
			0.31	-1.58171				601.22	-1.70425
			0.311	-1.58748				601.225	-1.52951
			0.312	-1.59233				601.23	-1.65117
			0.313	-1.59621				601.235	-1.52917
			0.314	-1.5991				601.24	-1.50478
			0.315	-1.60097				601.245	-1.65731
			0.316	-1.6018				601.25	-1.55423
			0.317	-1.60159				601.255	-1.67443
			0.318	-1.60035				601.26	-1.71464
			0.319	-1.59812				601.265	-1.57581
			0.32	-1.59492				601.27	-1.72013
			0.321	-1.59083				601.275	-1.60031
			0.322	-1.58587				601.28	-1.55722
			0.323	-1.58013				601.285	-1.51444
			0.324	-1.57367				601.29	-1.64413
			0.325	-1.56658				601.295	-1.76752
			0.326	-1.55894				601.3	-1.71969
			0.327	-1.55084				601.305	-1.62115
			0.328	-1.54237				601.31	-1.64652
			0.329	-1.53364				601.315	-1.63419
			0.33	-1.52473				601.32	-1.6302
			0.331	-1.51572				601.325	-1.6878
			0.332	-1.50671				601.33	-1.74873
			0.333	-1.49777				601.335	-1.51282
			0.334	-1.48898				601.34	-1.51829
			0.335	-1.4804				601.345	-0.520364
			0.336	-1.4721				601.35	-0.537084
			0.337	-1.46411				601.355	-0.525252
			0.338	-1.45647				601.36	-0.438743
			0.339	-1.4492				601.365	-1.4319
			0.34	-1.44232				601.37	-1.52327
			0.341	-1.43584				601.375	-1.62212
			0.342	-1.42975				601.38	-1.63531
			0.343	-1.42406				601.385	-1.63312
			0.344	-1.41876				601.39	-1.5447
			0.345	-1.41384				601.395	-1.44612
			0.346	-1.40927				601.4	-1.64022
			0.347	-1.40506				601.405	-1.50286
			0.348	-1.40119				601.41	-1.72002
			0.349	-1.39765				601.415	-1.59893
			0.35	-1.39446				601.42	-1.73858
			0.351	-1.39161				601.425	-1.58198
			0.352	-1.38912				601.43	-1.63071
			0.353	-1.387				601.435	-1.48496
			0.354	-1.38529				601.44	-1.62137
			0.355	-1.38401				601.445	-1.61036
			0.356	-1.38319				601.45	-1.60389
			0.357	-1.38285				601.455	-1.6449
			0.358	-1.38302				601.46	-1.59721
			0.359	-1.38373				601.465	-1.44781
			0.36	-1.385				601.47	-1.53189
			0.361	-1.38685				601.475	-1.51482
			0.362	-1.38929				601.48	-1.61518
			0.363	-1.39232				601.485	-0.502539
			0.364	-1.39593				601.49	-0.607482
			0.365	-1.40009				601.495	-0.355135
			0.366	-1.40475				601.5	-0.413096
			0.367	-1.40988				601.505	-0.524942
			0.368	-1.41541				601.51	-0.305736
			0.369	-1.42127				601.515	-0.357797
			0.37	-1.4274				601.52	-0.417879
			0.371	-1.43372				601.525	-0.461063
			0.372	-1.44012				601.53	-0.409351
			0.373	-1.44653				601.535	-0.557981
			0.374	-1.45287				601.54	-0.279218
			0.375	-1.45905				601.545	-0.443533
			0.376	-1.46501				601.55	-0.374056
			0.377	-1.47067				601.555	-0.438525
			0.378	-1.47597				601.56	-0.443996
			0.379	-1.48088				601.565	-0.398951
			0.38	-1.48533				601.57	-0.520944
			0.381	-1.48931				601.575	-1.58758
			0.382	-1.49281				601.58	-1.55717
			0.383	-1.49581				601.585	-1.53567
			0.384	-1.49834				601.59	-1.59941
			0.385	-1.50041				601.595	-1.53036
			0.386	-1.50204				601.6	-1.64895
			0.387	-1.50327				601.605	-1.50125
			0.388	-1.50414				601.61	-1.58561
			0.389	-1.5047				601.615	-1.60146
			0.39	-1.50498				601.62	-1.64347
			0.391	-1.50505				601.625	-1.51982
			0.392	-1.50494				601.63	-1.53086
			0.393	-1.50471				601.635	-1.45723
			0.394	-1.50441				601.64	-1.52262
			0.395	-1.50408				601.645	-1.47894
			0.396	-1.50377				601.65	-1.53624
			0.397	-1.50351				601.655	-1.65264
			0.398	-1.50333				601.66	-1.6307
			0.399	-1.50327				601.665	-1.74695
			0.4	-1.50335				601.67	-1.49951
			0.401	-1.5036				601.675	-1.54367
			0.402	-1.50403				601.68	-1.5718
			0.403	-1.50466				601.685	-1.59472
			0.404	-1.50549				601.69	-1.46148
			0.405	-1.50653				601.695	-1.63218
			0.406	-1.50778				601.7	-1.65829
			0.407	-1.50923				601.705	-1.50256
			0.408	-1.51088				601.71	-1.56734
			0.409	-1.51271				601.715	-1.57066
			0.41	-1.51471				601.72	-1.47597
			0.411	-1.51686				601.725	-1.43936
			0.412	-1.51913				601.73	-1.60474
			0.413	-1.5215				601.735	-1.60179
			0.414	-1.52393				601.74	-1.44719
			0.415	-1.52638				601.745	-1.74116
			0.416	-1.52881				601.75	-1.53293
			0.417	-1.53118				601.755	-1.63807
			0.418	-1.53344				601.76	-1.59214
			0.419	-1.53555				601.765	-1.61167
			0.42	-1.53746				601.77	-1.51061
			0.421	-1.53912				601.775	-1.5349
			0.422	-1.54051				601.78	-1.57211
			0.423	-1.54158				601.785	-1.57353
			0.424	-1.5423				601.79	-1.5732
			0.425	-1.54263				601.795	-1.56551
			0.426	-1.54255				601.8	-1.47991
			0.427	-1.54202				601.805	-1.50371
			0.428	-1.54104				601.81	-1.63408
			0.429	-1.5396				601.815	-1.57728
			0.43	-1.53771				601.82	-1.57968
			0.431	-1.53538				601.825	-0.591381
			0.432	-1.53263				601.83	-0.344341
			0.433	-1.52947				601.835	-0.483696
			0.434	-1.52596				601.84	-0.622889
			0.435	-1.52212				601.845	-1.62948
			0.436	-1.51802				601.85	-1.52916
			0.437	-1.5137				601.855	-1.67759
			0.438	-1.50924				601.86	-1.58589
			0.439	-1.50468				601.865	-1.44811
			0.44	-1.50009				601.87	-1.48462
			0.441	-1.49554				601.875	-1.44236
			0.442	-1.49109				601.88	-1.54894
			0.443	-1.48681				601.885	-1.53235
			0.444	-1.48277				601.89	-1.68746
			0.445	-1.47902				601.895	-1.56612
			0.446	-1.47561				601.9	-1.62107
			0.447	-1.47258				601.905	-1.63572
			0.448	-1.46998				601.91	-1.70082
			0.449	-1.46782				601.915	-1.58784
			0.45	-1.46612				601.92	-1.60546
			0.451	-1.46489				601.925	-1.62774
			0.452	-1.46412				601.93	-1.69033
			0.453	-1.4638				601.935	-1.55869
			0.454	-1.46391				601.94	-1.61506
			0.455	-1.4644				601.945	-1.55817
			0.456	-1.46524				601.95	-1.54185
			0.457	-1.46637				601.955	-1.62028
			0.458	-1.46772				601.96	-1.69553
			0.459	-1.46923				601.965	-1.76836
			0.46	-1.47084				601.97	-1.42135
			0.461	-1.47247				601.975	-1.75399
			0.462	-1.47404				601.98	-1.59739
			0.463	-1.47549				601.985	-1.53343
			0.464	-1.47674				601.99	-1.67113
			0.465	-1.47772				601.995	-1.6118
			0.466	-1.47838				602	-1.70787
			0.467	-1.47865				602.005	-1.47202
			0.468	-1.47849				602.01	-1.57731
			0.469	-1.47786				602.015	-1.67375
			0.47	-1.47672				602.02	-1.4973
			0.471	-1.47506				602.025	-1.58039
			0.472	-1.47289				602.03	-1.6034
			0.473	-1.4702				602.035	-1.6458
			0.474	-1.46702				602.04	-1.66851
			0.475	-1.46337				602.045	-1.59133
			0.476	-1.45931				602.05	-1.49923
			0.477	-1.45488				602.055	-1.64004
			0.478	-1.45014				602.06	-1.5488
			0.479	-1.44516				602.065	-1.62753
			0.48	-1.44001				602.07	-1.601
			0.481	-1.43477				602.075	-1.62162
			0.482	-1.42953				602.08	-1.44382
			0.483	-1.42436				602.085	-1.54927
			0.484	-1.41936				602.09	-1.61517
			0.485	-1.41461				602.095	-1.63656
			0.486	-1.41018				602.1	-1.55677
			0.487	-1.40614				602.105	-1.63127
			0.488	-1.40257				602.11	-1.6172
			0.489	-1.39951				602.115	-1.63774
			0.49	-1.39701				602.12	-1.69514
			0.491	-1.39511				602.125	-1.6148
			0.492	-1.39381				602.13	-1.66397
			0.493	-1.39314				602.135	-1.5982
			0.494	-1.39309				602.14	-1.54119
			0.495	-1.39364				602.145	-1.53203
			0.496	-1.39477				602.15	-1.50466
			0.497	-1.39643				602.155	-1.55642
			0.498	-1.39858				602.16	-1.58823
			0.499	-1.40115				602.165	-1.55046
			0.5	-1.40407				602.17	-1.70387
			0.501	-1.40727				602.175	-1.43354
			0.502	-1.41067				602.18	-1.50953
			0.503	-1.41419				602.185	-1.56663
			0.504	-1.41775				602.19	-1.52422
			0.505	-1.42126				602.195	-1.5322
			0.506	-1.42465				602.2	-1.63305
			0.507	-1.42785				602.205	-1.61021
			0.508	-1.43079				602.21	-1.64186
			0.509	-1.43342				602.215	-1.57589
			0.51	-1.43568				602.22	-1.66888
			0.511	-1.43755				602.225	-1.75908
			0.512	-1.43899				602.23	-1.65756
			0.513	-1.44				602.235	-1.68656
			0.514	-1.44057				602.24	-1.53356
			0.515	-1.44072				602.245	-1.54025
			0.516	-1.44047				602.25	-1.65827
			0.517	-1.43986				602.255	-1.69093
			0.518	-1.43894				602.26	-1.67531
			0.519	-1.43776				602.265	-1.57148
			0.52	-1.43639				602.27	-1.59521
			0.521	-1.43489				602.275	-1.52864
			0.522	-1.43335				602.28	-1.51747
			0.523	-1.43182				602.285	-1.52889
			0.524	-1.43039				602.29	-1.56942
			0.525	-1.42913				602.295	-1.585
			0.526	-1.42809				602.3	-1.65688
			0.527	-1.42735				602.305	-1.68376
			0.528	-1.42695				602.31	-1.46485
			0.529	-1.42693				602.315	-1.57779
			0.53	-1.42732				602.32	-1.50279
			0.531	-1.42816				602.325	-1.70481
			0.532	-1.42944				602.33	-1.45797
			0.533	-1.43117				602.335	-1.52933
			0.534	-1.43333				602.34	-1.5882
			0.535	-1.43589				602.345	-1.61714
			0.536	-1.4388				602.35	-1.43316
			0.537	-1.44201				602.355	-1.41412
			0.538	-1.44548				602.36	-1.74588
			0.539	-1.44915				602.365	-1.64883
			0.54	-1.45293				602.37	-1.43412
			0.541	-1.45677				602.375	-1.77062
			0.542	-1.46059				602.38	-1.47092
			0.543	-1.46431				602.385	-1.51335
			0.544	-1.46788				602.39	-1.56366
			0.545	-1.47122				602.395	-1.54256
			0.546	-1.47428				602.4	-1.49953
			0.547	-1.477				602.405	-1.52523
			0.548	-1.47934				602.41	-1.6416
			0.549	-1.48127				602.415	-1.55685
			0.55	-1.48275				602.42	-1.54359
			0.551	-1.48377				602.425	-1.49027
			0.552	-1.48433				602.43	-1.65061
			0.553	-1.48442				602.435	-1.58474
			0.554	-1.48406				602.44	-1.61857
			0.555	-1.48327				602.445	-1.50524
			0.556	-1.48206				602.45	-1.50062
			0.557	-1.48047				602.455	-1.77733
			0.558	-1.47852				602.46	-1.63522
			0.559	-1.47626				602.465	-1.53671
			0.56	-1.47371				602.47	-1.5724
			0.561	-1.47092				602.475	-1.60332
			0.562	-1.46791				602.48	-1.59511
			0.563	-1.46471				602.485	-1.53745
			0.564	-1.46136				602.49	-1.59907
			0.565	-1.45787				602.495	-1.66204
			0.566	-1.45428				602.5	-1.62664
			0.567	-1.4506				602.505	-1.57222
			0.568	-1.44687				602.51	-1.50989
			0.569	-1.44309				602.515	-1.72748
			0.57	-1.43928				602.52	-1.64337
			0.571	-1.43546				602.525	-1.59391
			0.572	-1.43165				602.53	-1.51587
			0.573	-1.42786				602.535	-1.52229
			0.574	-1.42411				602.54	-1.63252
			0.575	-1.42042				602.545	-1.54775
			0.576	-1.41683				602.55	-1.63584
			0.577	-1.41336				602.555	-1.58798
			0.578	-1.41004				602.56	-1.56427
			0.579	-1.40691				602.565	-1.48126
			0.58	-1.404				602.57	-1.72378
			0.581	-1.40136				602.575	-1.52184
			0.582	-1.39903				602.58	-1.58108
			0.583	-1.39705				602.585	-1.51279
			0.584	-1.39547				602.59	-1.65578
			0.585	-1.39433				602.595	-1.56648
			0.586	-1.39368				602.6	-1.48531
			0.587	-1.39354				602.605	-1.26265
			0.588	-1.39397				602.61	-0.82083
			0.589	-1.39497				602.615	-0.989624
			0.59	-1.39657				602.62	-0.980686
			0.591	-1.39877				602.625	-1.30814
			0.592	-1.40159				602.63	-0.854922
			0.593	-1.40501				602.635	-1.0141
			0.594	-1.40904				602.64	-0.925767
			0.595	-1.41363				602.645	-0.985944
			0.596	-1.41878				602.65	-0.982371
			0.597	-1.42444				602.655	-1.12501
			0.598	-1.43057				602.66	-1.31421
			0.599	-1.43712				602.665	-1.24568
			0.6	-1.44404				602.67	-1.59395
			0.601	-1.45126				602.675	-1.54182
			0.602	-1.45871				602.68	-1.68945
			0.603	-1.46634				602.685	-1.62986
			0.604	-1.47406				602.69	-1.56545
			0.605	-1.48182				602.695	-1.58582
			0.606	-1.48954				602.7	-1.62431
			0.607	-1.49714				602.705	-1.658
			0.608	-1.50457				602.71	-1.62713
			0.609	-1.51176				602.715	-1.49867
			0.61	-1.51865				602.72	-1.6411
			0.611	-1.52518				602.725	-1.60543
			0.612	-1.53131				602.73	-1.55853
			0.613	-1.53697				602.735	-1.61307
			0.614	-1.54215				602.74	-1.69528
			0.615	-1.5468				602.745	-1.65771
			0.616	-1.55091				602.75	-1.58592
			0.617	-1.55446				602.755	-1.55871
			0.618	-1.55744				602.76	-1.60131
			0.619	-1.55986				602.765	-1.5607
			0.62	-1.56172				602.77	-1.46983
			0.621	-1.56304				602.775	-1.55788
			0.622	-1.56385				602.78	-1.59706
			0.623	-1.56416				602.785	-1.61272
			0.624	-1.56403				602.79	-1.58457
			0.625	-1.56349				602.795	-1.83305
			0.626	-1.56258				602.8	-1.62747
			0.627	-1.56135				602.805	-1.60926
			0.628	-1.55984				602.81	-1.67442
			0.629	-1.55811				602.815	-1.58985
			0.63	-1.55619				602.82	-1.52012
			0.631	-1.55415				602.825	-1.54555
			0.632	-1.55201				602.83	-1.48088
			0.633	-1.54983				602.835	-1.57531
			0.634	-1.54763				602.84	-1.55778
			0.635	-1.54544				602.845	-1.67311
			0.636	-1.54327				602.85	-1.55682
			0.637	-1.54114				602.855	-1.58021
			0.638	-1.53907				602.86	-1.46344
			0.639	-1.53705				602.865	-1.55691
			0.64	-1.5351				602.87	-1.55681
			0.641	-1.53319				602.875	-1.68819
			0.642	-1.53132				602.88	-1.55299
			0.643	-1.52948				602.885	-1.46754
			0.644	-1.52764				602.89	-1.51411
			0.645	-1.52578				602.895	-1.58409
			0.646	-1.52389				602.9	-1.59121
			0.647	-1.52194				602.905	-1.58012
			0.648	-1.51992				602.91	-1.64192
			0.649	-1.5178				602.915	-1.51098
			0.65	-1.51558				602.92	-1.55608
			0.651	-1.51326				602.925	-1.53239
			0.652	-1.51081				602.93	-1.58411
			0.653	-1.50825				602.935	-1.53203
			0.654	-1.50557				602.94	-1.60465
			0.655	-1.50278				602.945	-1.57116
			0.656	-1.49989				602.95	-1.5644
			0.657	-1.49693				602.955	-1.6249
			0.658	-1.49393				602.96	-1.69854
			0.659	-1.49091				602.965	-1.59288
			0.66	-1.4879				602.97	-1.58553
			0.661	-1.48492				602.975	-1.48535
			0.662	-1.48202				602.98	-1.67134
			0.663	-1.47923				602.985	-1.59467
			0.664	-1.47658				602.99	-1.69
			0.665	-1.4741				602.995	-1.57217
			0.666	-1.47181				603	-1.59638
			0.667	-1.46975				603.005	-1.45349
			0.668	-1.46794				603.01	-1.52819
			0.669	-1.46638				603.015	-1.69106
			0.67	-1.46509				603.02	-1.71533
			0.671	-1.46407				603.025	-1.34666
			0.672	-1.46331				603.03	-1.48352
			0.673	-1.46281				603.035	-1.56464
			0.674	-1.46254				603.04	-1.63548
			0.675	-1.46248				603.045	-1.55961
			0.676	-1.46261				603.05	-1.54629
			0.677	-1.46291				603.055	-1.48517
			0.678	-1.46336				603.06	-1.45174
			0.679	-1.46391				603.065	-1.57439
			0.68	-1.46455				603.07	-1.5487
			0.681	-1.46522				603.075	-1.62258
			0.682	-1.46593				603.08	-1.55631
			0.683	-1.46663				603.085	-1.54183
			0.684	-1.46732				603.09	-1.68148
			0.685	-1.46798				603.095	-1.63432
			0.686	-1.46861				603.1	-1.64127
			0.687	-1.46921				603.105	-1.50954
			0.688	-1.46977				603.11	-1.52948
			0.689	-1.47031				603.115	-1.53914
			0.69	-1.47084				603.12	-1.54754
			0.691	-1.47138				603.125	-1.53368
			0.692	-1.47193				603.13	-1.70705
			0.693	-1.47253				603.135	-1.72044
			0.694	-1.47319				603.14	-1.62898
			0.695	-1.47393				603.145	-1.5236
			0.696	-1.47479				603.15	-1.71648
			0.697	-1.47578				603.155	-1.55592
			0.698	-1.47693				603.16	-1.59255
			0.699	-1.47823				603.165	-1.42811
			0.7	-1.47971				603.17	-1.59306
			0.701	-1.48136				603.175	-1.53837
			0.702	-1.48318				603.18	-1.63316
			0.703	-1.48517				603.185	-1.62062
			0.704	-1.48732				603.19	-1.63278
			0.705	-1.48963				603.195	-1.51968
			0.706	-1.49206				603.2	-1.55989
			0.707	-1.49461				603.205	-1.58671
			0.708	-1.49724				603.21	-1.59844
			0.709	-1.49994				603.215	-1.43999
			0.71	-1.50266				603.22	-1.64684
			0.711	-1.50538				603.225	-1.58605
			0.712	-1.50807				603.23	-1.74035
			0.713	-1.51068				603.235	-1.54497
			0.714	-1.51318				603.24	-1.659
			0.715	-1.51554				603.245	-1.6595
			0.716	-1.51773				603.25	-1.57617
			0.717	-1.51971				603.255	-1.47687
			0.718	-1.52146				603.26	-1.60548
			0.719	-1.52295				603.265	-1.65539
			0.72	-1.52416				603.27	-1.58909
			0.721	-1.52508				603.275	-1.4424
			0.722	-1.52568				603.28	-1.68473
			0.723	-1.52597				603.285	-1.63118
			0.724	-1.52592				603.29	-1.6251
			0.725	-1.52557				603.295	-1.67146
			0.726	-1.52491				603.3	-1.72169
			0.727	-1.52396				603.305	-1.66573
			0.728	-1.52274				603.31	-1.48371
			0.729	-1.52129				603.315	-1.88982
			0.73	-1.51962				603.32	-1.84088
			0.731	-1.5178				603.325	-1.58931
			0.732	-1.51585				603.33	-1.64785
			0.733	-1.51382				603.335	-1.6278
			0.734	-1.51176				603.34	-1.54274
			0.735	-1.50973				603.345	-1.52432
			0.736	-1.50777				603.35	-1.75248
			0.737	-1.50594				603.355	-1.45839
			0.738	-1.50428				603.36	-1.66607
			0.739	-1.50283				603.365	-1.71297
			0.74	-1.50163				603.37	-1.51232
			0.741	-1.50073				603.375	-1.59077
			0.742	-1.50015				603.38	-1.61402
			0.743	-1.49991				603.385	-1.67103
			0.744	-1.50004				603.39	-1.70906
			0.745	-1.50052				603.395	-1.67367
			0.746	-1.50136				603.4	-1.72709
			0.747	-1.50253				603.405	-1.72928
			0.748	-1.50402				603.41	-1.64532
			0.749	-1.5058				603.415	-1.6389
			0.75	-1.50781				603.42	-1.65795
			0.751	-1.51001				603.425	-1.61078
			0.752	-1.51234				603.43	-1.80238
			0.753	-1.51474				603.435	-1.78479
			0.754	-1.51714				603.44	-1.57989
			0.755	-1.51945				603.445	-1.75085
			0.756	-1.52161				603.45	-1.6026
			0.757	-1.52353				603.455	-1.68577
			0.758	-1.52514				603.46	-1.59354
			0.759	-1.52635				603.465	-1.55618
			0.76	-1.52711				603.47	-1.71902
			0.761	-1.52736				603.475	-1.6775
			0.762	-1.52704				603.48	-1.69499
			0.763	-1.52612				603.485	-1.57061
			0.764	-1.52456				603.49	-1.65206
			0.765	-1.52234				603.495	-1.60121
			0.766	-1.51947				603.5	-1.60471
			0.767	-1.51596				603.505	-1.68292
			0.768	-1.51184				603.51	-1.6956
			0.769	-1.50715				603.515	-1.77441
			0.77	-1.50194				603.52	-1.60049
			0.771	-1.4963				603.525	-1.09606
			0.772	-1.49029				603.53	-1.02298
			0.773	-1.48403				603.535	-0.884405
			0.774	-1.47761				603.54	-0.924329
			0.775	-1.47114				603.545	-1.07409
			0.776	-1.46473				603.55	-1.58572
			0.777	-1.45849				603.555	-1.6365
			0.778	-1.45252				603.56	-1.49303
			0.779	-1.44692				603.565	-1.57717
			0.78	-1.4418				603.57	-1.62403
			0.781	-1.43724				603.575	-1.69409
			0.782	-1.43331				603.58	-1.644
			0.783	-1.43008				603.585	-1.5909
			0.784	-1.42758				603.59	-1.52833
			0.785	-1.42584				603.595	-1.59124
			0.786	-1.42488				603.6	-1.68388
			0.787	-1.4247				603.605	-1.61232
			0.788	-1.42528				603.61	-1.6286
			0.789	-1.42658				603.615	-1.61409
			0.79	-1.42857				603.62	-1.57815
			0.791	-1.43119				603.625	-1.54486
			0.792	-1.43436				603.63	-1.66442
			0.793	-1.43802				603.635	-1.49127
			0.794	-1.44209				603.64	-1.62947
			0.795	-1.44647				603.645	-1.76818
			0.796	-1.4511				603.65	-1.60806
			0.797	-1.45588				603.655	-1.54775
			0.798	-1.46071				603.66	-1.51569
			0.799	-1.46553				603.665	-1.65651
			0.8	-1.47025				603.67	-1.73625
			0.801	-1.47481				603.675	-1.52387
			0.802	-1.47915				603.68	-1.66554
			0.803	-1.48321				603.685	-1.57228
			0.804	-1.48697				603.69	-1.60046
			0.805	-1.49038
			0.806	-1.49345
			0.807	-1.49615
			0.808	-1.49849
			0.809	-1.50048
			0.81	-1.50214
			0.811	-1.5035
			0.812	-1.50459
			0.813	-1.50547
			0.814	-1.50618
			0.815	-1.50677
			0.816	-1.50728
			0.817	-1.50777
			0.818	-1.50828
			0.819	-1.50885
			0.82	-1.50951
			0.821	-1.51029
			0.822	-1.5112
			0.823	-1.51226
			0.824	-1.51344
			0.825	-1.51473
			0.826	-1.5161
			0.827	-1.51751
			0.828	-1.51893
			0.829	-1.52028
			0.83	-1.52153
			0.831	-1.52258
			0.832	-1.52339
			0.833	-1.52387
			0.834	-1.52397
			0.835	-1.52364
			0.836	-1.52282
			0.837	-1.52147
			0.838	-1.51956
			0.839	-1.51707
			0.84	-1.514
			0.841	-1.51035
			0.842	-1.50614
			0.843	-1.50142
			0.844	-1.49622
			0.845	-1.49061
			0.846	-1.48466
			0.847	-1.47843
			0.848	-1.472
			0.849	-1.46546
			0.85	-1.4589
			0.851	-1.45239
			0.852	-1.44603
			0.853	-1.43991
			0.854	-1.4341
			0.855	-1.42867
			0.856	-1.42369
			0.857	-1.4192
			0.858	-1.41527
			0.859	-1.41192
			0.86	-1.40921
			0.861	-1.40714
			0.862	-1.40575
			0.863	-1.40503
			0.864	-1.405
			0.865	-1.40565
			0.866	-1.40698
			0.867	-1.40897
			0.868	-1.41161
			0.869	-1.41488
			0.87	-1.41876
			0.871	-1.42323
			0.872	-1.42825
			0.873	-1.43379
			0.874	-1.43981
			0.875	-1.44628
			0.876	-1.45315
			0.877	-1.46037
			0.878	-1.4679
			0.879	-1.47567
			0.88	-1.48363
			0.881	-1.49171
			0.882	-1.49984
			0.883	-1.50796
			0.884	-1.51599
			0.885	-1.52385
			0.886	-1.53146
			0.887	-1.53874
			0.888	-1.5456
			0.889	-1.55196
			0.89	-1.55775
			0.891	-1.56289
			0.892	-1.56731
			0.893	-1.57096
			0.894	-1.57377
			0.895	-1.5757
			0.896	-1.57671
			0.897	-1.57679
			0.898	-1.57592
			0.899	-1.57412
			0.9	-1.57141
			0.901	-1.56781
			0.902	-1.56337
			0.903	-1.55817
			0.904	-1.55228
			0.905	-1.54579
			0.906	-1.53878
			0.907	-1.53138
			0.908	-1.52368
			0.909	-1.51582
			0.91	-1.5079
			0.911	-1.50005
			0.912	-1.4924
			0.913	-1.48506
			0.914	-1.47815
			0.915	-1.47176
			0.916	-1.46598
			0.917	-1.46089
			0.918	-1.45656
			0.919	-1.45302
			0.92	-1.4503
			0.921	-1.44843
			0.922	-1.44739
			0.923	-1.44718
			0.924	-1.44774
			0.925	-1.44903
			0.926	-1.45099
			0.927	-1.45353
			0.928	-1.45657
			0.929	-1.46
			0.93	-1.46373
			0.931	-1.46765
			0.932	-1.47167
			0.933	-1.47567
			0.934	-1.47958
			0.935	-1.48329
			0.936	-1.48674
			0.937	-1.48985
			0.938	-1.49258
			0.939	-1.49488
			0.94	-1.49672
			0.941	-1.4981
			0.942	-1.499
			0.943	-1.49944
			0.944	-1.49945
			0.945	-1.49904
			0.946	-1.49826
			0.947	-1.49716
			0.948	-1.49577
			0.949	-1.49414
			0.95	-1.49232
			0.951	-1.49036
			0.952	-1.48829
			0.953	-1.48615
			0.954	-1.48397
			0.955	-1.48177
			0.956	-1.47957
			0.957	-1.47738
			0.958	-1.4752
			0.959	-1.47304
			0.96	-1.47089
			0.961	-1.46875
			0.962	-1.46661
			0.963	-1.46446
			0.964	-1.46229
			0.965	-1.46011
			0.966	-1.4579
			0.967	-1.45567
			0.968	-1.45341
			0.969	-1.45112
			0.97	-1.44881
			0.971	-1.4465
			0.972	-1.44419
			0.973	-1.4419
			0.974	-1.43965
			0.975	-1.43746
			0.976	-1.43534
			0.977	-1.4333
			0.978	-1.43137
			0.979	-1.42956
			0.98	-1.42789
			0.981	-1.42637
			0.982	-1.42501
			0.983	-1.42382
			0.984	-1.42279
			0.985	-1.42193
			0.986	-1.42124
			0.987	-1.4207
			0.988	-1.42033
			0.989	-1.4201
			0.99	-1.42001
			0.991	-1.42003
			0.992	-1.42016
			0.993	-1.42036
			0.994	-1.42063
			0.995	-1.42094
			0.996	-1.42128
			0.997	-1.42161
			0.998	-1.42192
			0.999	-1.42218
			1	-1.42239
			1.001	-1.42253
			1.002	-1.42258
			1.003	-1.42253
			1.004	-1.42239
			1.005	-1.42214
			1.006	-1.42178
			1.007	-1.42133
			1.008	-1.42078
			1.009	-1.42014
			1.01	-1.41945
			1.011	-1.4187
			1.012	-1.41793
			1.013	-1.41715
			1.014	-1.41639
			1.015	-1.41567
			1.016	-1.41502
			1.017	-1.41445
			1.018	-1.41399
			1.019	-1.41366
			1.02	-1.41345
			1.021	-1.4134
			1.022	-1.41349
			1.023	-1.41372
			1.024	-1.4141
			1.025	-1.41462
			1.026	-1.41526
			1.027	-1.41599
			1.028	-1.4168
			1.029	-1.41765
			1.03	-1.41851
			1.031	-1.41935
			1.032	-1.42013
			1.033	-1.42082
			1.034	-1.42139
			1.035	-1.42179
			1.036	-1.42201
			1.037	-1.42199
			1.038	-1.42173
			1.039	-1.42119
			1.04	-1.42036
			1.041	-1.41924
			1.042	-1.41781
			1.043	-1.41608
			1.044	-1.41407
			1.045	-1.41179
			1.046	-1.40927
			1.047	-1.40654
			1.048	-1.40364
			1.049	-1.4006
			1.05	-1.39747
			1.051	-1.39432
			1.052	-1.3912
			1.053	-1.38816
			1.054	-1.38526
			1.055	-1.38256
			1.056	-1.38011
			1.057	-1.37796
			1.058	-1.37616
			1.059	-1.37475
			1.06	-1.37376
			1.061	-1.37323
			1.062	-1.37317
			1.063	-1.37358
			1.064	-1.37448
			1.065	-1.37586
			1.066	-1.3777
			1.067	-1.37998
			1.068	-1.38268
			1.069	-1.38575
			1.07	-1.38915
			1.071	-1.39283
			1.072	-1.39675
			1.073	-1.40086
			1.074	-1.40509
			1.075	-1.40942
			1.076	-1.41377
			1.077	-1.41809
			1.078	-1.42235
			1.079	-1.42651
			1.08	-1.43053
			1.081	-1.43438
			1.082	-1.43804
			1.083	-1.4415
			1.084	-1.44473
			1.085	-1.44772
			1.086	-1.45046
			1.087	-1.45296
			1.088	-1.45521
			1.089	-1.45722
			1.09	-1.459
			1.091	-1.46055
			1.092	-1.46188
			1.093	-1.463
			1.094	-1.46391
			1.095	-1.46463
			1.096	-1.46517
			1.097	-1.46554
			1.098	-1.46575
			1.099	-1.46581
			1.1	-1.46573
			1.101	-1.46551
			1.102	-1.46519
			1.103	-1.46476
			1.104	-1.46424
			1.105	-1.46366
			1.106	-1.46301
			1.107	-1.46231
			1.108	-1.46159
			1.109	-1.46084
			1.11	-1.46009
			1.111	-1.45935
			1.112	-1.45862
			1.113	-1.45792
			1.114	-1.45726
			1.115	-1.45663
			1.116	-1.45601
			1.117	-1.4554
			1.118	-1.45479
			1.119	-1.45417
			1.12	-1.45352
			1.121	-1.4528
			1.122	-1.45199
			1.123	-1.45107
			1.124	-1.45002
			1.125	-1.44881
			1.126	-1.44743
			1.127	-1.44584
			1.128	-1.44404
			1.129	-1.44203
			1.13	-1.43979
			1.131	-1.43734
			1.132	-1.4347
			1.133	-1.43188
			1.134	-1.42892
			1.135	-1.42586
			1.136	-1.42273
			1.137	-1.41961
			1.138	-1.41655
			1.139	-1.41359
			1.14	-1.4108
			1.141	-1.40825
			1.142	-1.40598
			1.143	-1.40407
			1.144	-1.40257
			1.145	-1.40152
			1.146	-1.40095
			1.147	-1.4009
			1.148	-1.40137
			1.149	-1.40238
			1.15	-1.40392
			1.151	-1.40597
			1.152	-1.40851
			1.153	-1.4115
			1.154	-1.4149
			1.155	-1.41864
			1.156	-1.42265
			1.157	-1.42687
			1.158	-1.43123
			1.159	-1.43563
			1.16	-1.44002
			1.161	-1.44431
			1.162	-1.44844
			1.163	-1.45232
			1.164	-1.4559
			1.165	-1.4591
			1.166	-1.46188
			1.167	-1.46418
			1.168	-1.46598
			1.169	-1.46726
			1.17	-1.46799
			1.171	-1.46818
			1.172	-1.46781
			1.173	-1.4669
			1.174	-1.46546
			1.175	-1.46353
			1.176	-1.46113
			1.177	-1.4583
			1.178	-1.45508
			1.179	-1.45153
			1.18	-1.44768
			1.181	-1.44357
			1.182	-1.43927
			1.183	-1.4348
			1.184	-1.43022
			1.185	-1.42556
			1.186	-1.42086
			1.187	-1.41616
			1.188	-1.41148
			1.189	-1.40686
			1.19	-1.40232
			1.191	-1.39787
			1.192	-1.39354
			1.193	-1.38935
			1.194	-1.38531
			1.195	-1.38144
			1.196	-1.37774
			1.197	-1.37423
			1.198	-1.37092
			1.199	-1.36783
			1.2	-1.36496
			1.201	-1.36233
			1.202	-1.35994
			1.203	-1.35781
			1.204	-1.35593
			1.205	-1.3543
			1.206	-1.35294
			1.207	-1.35184
			1.208	-1.35099
			1.209	-1.35038
			1.21	-1.34999
			1.211	-1.3498
			1.212	-1.3498
			1.213	-1.34994
			1.214	-1.35022
			1.215	-1.35059
			1.216	-1.35102
			1.217	-1.35147
			1.218	-1.35191
			1.219	-1.35232
			1.22	-1.35267
			1.221	-1.35293
			1.222	-1.3531
			1.223	-1.35317
			1.224	-1.35314
			1.225	-1.353
			1.226	-1.35278
			1.227	-1.3525
			1.228	-1.35218
			1.229	-1.35186
			1.23	-1.35157
			1.231	-1.35136
			1.232	-1.35126
			1.233	-1.35133
			1.234	-1.3516
			1.235	-1.35211
			1.236	-1.3529
			1.237	-1.354
			1.238	-1.35544
			1.239	-1.35725
			1.24	-1.35945
			1.241	-1.36203
			1.242	-1.36498
			1.243	-1.3683
			1.244	-1.37198
			1.245	-1.376
			1.246	-1.38032
			1.247	-1.38493
			1.248	-1.38977
			1.249	-1.39481
			1.25	-1.4
			1.251	-1.40531
			1.252	-1.4107
			1.253	-1.41612
			1.254	-1.42154
			1.255	-1.42691
			1.256	-1.43221
			1.257	-1.43739
			1.258	-1.44244
			1.259	-1.44731
			1.26	-1.45198
			1.261	-1.45642
			1.262	-1.4606
			1.263	-1.46451
			1.264	-1.46812
			1.265	-1.47142
			1.266	-1.47438
			1.267	-1.47698
			1.268	-1.47923
			1.269	-1.48111
			1.27	-1.48261
			1.271	-1.48373
			1.272	-1.48447
			1.273	-1.48483
			1.274	-1.4848
			1.275	-1.48442
			1.276	-1.48368
			1.277	-1.48261
			1.278	-1.48123
			1.279	-1.47957
			1.28	-1.47767
			1.281	-1.47554
			1.282	-1.47323
			1.283	-1.47076
			1.284	-1.46816
			1.285	-1.46547
			1.286	-1.46271
			1.287	-1.45991
			1.288	-1.4571
			1.289	-1.45428
			1.29	-1.45148
			1.291	-1.4487
			1.292	-1.44595
			1.293	-1.44323
			1.294	-1.44054
			1.295	-1.43786
			1.296	-1.4352
			1.297	-1.43254
			1.298	-1.42985
			1.299	-1.42714
			1.3	-1.42438
			1.301	-1.42156
			1.302	-1.41867
			1.303	-1.41571
			1.304	-1.41268
			1.305	-1.40956
			1.306	-1.40638
			1.307	-1.40314
			1.308	-1.39984
			1.309	-1.39652
			1.31	-1.39318
			1.311	-1.38986
			1.312	-1.3866
			1.313	-1.38343
			1.314	-1.38039
			1.315	-1.37751
			1.316	-1.37486
			1.317	-1.37246
			1.318	-1.37036
			1.319	-1.36859
			1.32	-1.36721
			1.321	-1.36623
			1.322	-1.3657
			1.323	-1.36563
			1.324	-1.36604
			1.325	-1.36694
			1.326	-1.36834
			1.327	-1.37022
			1.328	-1.37258
			1.329	-1.3754
			1.33	-1.37865
			1.331	-1.38228
			1.332	-1.38626
			1.333	-1.39051
			1.334	-1.39499
			1.335	-1.39963
			1.336	-1.40436
			1.337	-1.40911
			1.338	-1.41382
			1.339	-1.41842
			1.34	-1.42284
			1.341	-1.42702
			1.342	-1.4309
			1.343	-1.43443
			1.344	-1.43757
			1.345	-1.44031
			1.346	-1.44264
			1.347	-1.44453
			1.348	-1.44601
			1.349	-1.44708
			1.35	-1.44777
			1.351	-1.44812
			1.352	-1.44817
			1.353	-1.44797
			1.354	-1.44757
			1.355	-1.44703
			1.356	-1.44641
			1.357	-1.44577
			1.358	-1.44516
			1.359	-1.44462
			1.36	-1.44419
			1.361	-1.44389
			1.362	-1.44375
			1.363	-1.44377
			1.364	-1.44395
			1.365	-1.44428
			1.366	-1.44475
			1.367	-1.44532
			1.368	-1.44597
			1.369	-1.44666
			1.37	-1.44735
			1.371	-1.44799
			1.372	-1.44855
			1.373	-1.449
			1.374	-1.44932
			1.375	-1.44948
			1.376	-1.44948
			1.377	-1.44933
			1.378	-1.44904
			1.379	-1.44862
			1.38	-1.44812
			1.381	-1.44756
			1.382	-1.447
			1.383	-1.44649
			1.384	-1.4461
			1.385	-1.44587
			1.386	-1.44585
			1.387	-1.4461
			1.388	-1.44666
			1.389	-1.44757
			1.39	-1.44885
			1.391	-1.45053
			1.392	-1.45259
			1.393	-1.45505
			1.394	-1.45788
			1.395	-1.46106
			1.396	-1.46453
			1.397	-1.46826
			1.398	-1.47219
			1.399	-1.47626
			1.4	-1.48039
			1.401	-1.48453
			1.402	-1.4886
			1.403	-1.49255
			1.404	-1.49631
			1.405	-1.49983
			1.406	-1.50305
			1.407	-1.50593
			1.408	-1.50844
			1.409	-1.51057
			1.41	-1.51228
			1.411	-1.51358
			1.412	-1.51447
			1.413	-1.51497
			1.414	-1.51508
			1.415	-1.51485
			1.416	-1.51429
			1.417	-1.51343
			1.418	-1.51232
			1.419	-1.511
			1.42	-1.5095
			1.421	-1.50787
			1.422	-1.50616
			1.423	-1.50441
			1.424	-1.50266
			1.425	-1.50095
			1.426	-1.4993
			1.427	-1.49775
			1.428	-1.49634
			1.429	-1.49508
			1.43	-1.49401
			1.431	-1.49314
			1.432	-1.4925
			1.433	-1.49208
			1.434	-1.4919
			1.435	-1.49197
			1.436	-1.49229
			1.437	-1.49286
			1.438	-1.4937
			1.439	-1.49481
			1.44	-1.49617
			1.441	-1.49778
			1.442	-1.49963
			1.443	-1.50172
			1.444	-1.50404
			1.445	-1.50655
			1.446	-1.50926
			1.447	-1.51213
			1.448	-1.51515
			1.449	-1.5183
			1.45	-1.52154
			1.451	-1.52483
			1.452	-1.52814
			1.453	-1.53143
			1.454	-1.53466
			1.455	-1.5378
			1.456	-1.54079
			1.457	-1.5436
			1.458	-1.54619
			1.459	-1.5485
			1.46	-1.55051
			1.461	-1.55216
			1.462	-1.55343
			1.463	-1.55429
			1.464	-1.55471
			1.465	-1.55469
			1.466	-1.55421
			1.467	-1.55326
			1.468	-1.55185
			1.469	-1.54997
			1.47	-1.54766
			1.471	-1.54491
			1.472	-1.54176
			1.473	-1.53824
			1.474	-1.53438
			1.475	-1.53022
			1.476	-1.52578
			1.477	-1.52112
			1.478	-1.51628
			1.479	-1.51129
			1.48	-1.50619
			1.481	-1.50103
			1.482	-1.49583
			1.483	-1.49063
			1.484	-1.48545
			1.485	-1.48033
			1.486	-1.47528
			1.487	-1.47031
			1.488	-1.46546
			1.489	-1.46072
			1.49	-1.45609
			1.491	-1.45158
			1.492	-1.44718
			1.493	-1.44291
			1.494	-1.43875
			1.495	-1.43471
			1.496	-1.43077
			1.497	-1.42693
			1.498	-1.42319
			1.499	-1.41952
			1.5	-1.41594
			1.501	-1.41245
			1.502	-1.40905
			1.503	-1.40575
			1.504	-1.40256
			1.505	-1.39949
			1.506	-1.39655
			1.507	-1.39377
			1.508	-1.39116
			1.509	-1.38873
			1.51	-1.3865
			1.511	-1.38449
			1.512	-1.38273
			1.513	-1.38123
			1.514	-1.37999
			1.515	-1.37904
			1.516	-1.37837
			1.517	-1.37799
			1.518	-1.3779
			1.519	-1.3781
			1.52	-1.37859
			1.521	-1.37934
			1.522	-1.38034
			1.523	-1.38159
			1.524	-1.38305
			1.525	-1.38471
			1.526	-1.38655
			1.527	-1.38855
			1.528	-1.39068
			1.529	-1.39294
			1.53	-1.3953
			1.531	-1.39775
			1.532	-1.40028
			1.533	-1.40289
			1.534	-1.40556
			1.535	-1.4083
			1.536	-1.4111
			1.537	-1.41396
			1.538	-1.41687
			1.539	-1.41985
			1.54	-1.42289
			1.541	-1.42598
			1.542	-1.42915
			1.543	-1.43238
			1.544	-1.43568
			1.545	-1.43905
			1.546	-1.44246
			1.547	-1.44594
			1.548	-1.44945
			1.549	-1.453
			1.55	-1.45658
			1.551	-1.46017
			1.552	-1.46377
			1.553	-1.46734
			1.554	-1.47089
			1.555	-1.47439
			1.556	-1.47782
			1.557	-1.48116
			1.558	-1.48439
			1.559	-1.48751
			1.56	-1.49049
			1.561	-1.49332
			1.562	-1.49597
			1.563	-1.49843
			1.564	-1.50067
			1.565	-1.50269
			1.566	-1.50447
			1.567	-1.506
			1.568	-1.50728
			1.569	-1.50829
			1.57	-1.50904
			1.571	-1.50951
			1.572	-1.50972
			1.573	-1.50967
			1.574	-1.50938
			1.575	-1.50883
			1.576	-1.50806
			1.577	-1.50706
			1.578	-1.50587
			1.579	-1.50449
			1.58	-1.50295
			1.581	-1.50128
			1.582	-1.49951
			1.583	-1.49765
			1.584	-1.49573
			1.585	-1.49378
			1.586	-1.49183
			1.587	-1.48991
			1.588	-1.48805
			1.589	-1.48627
			1.59	-1.4846
			1.591	-1.48307
			1.592	-1.48169
			1.593	-1.4805
			1.594	-1.47951
			1.595	-1.47874
			1.596	-1.47821
			1.597	-1.47794
			1.598	-1.47794
			1.599	-1.47822
			1.6	-1.47878
			1.601	-1.47961
			1.602	-1.48073
			1.603	-1.48213
			1.604	-1.4838
			1.605	-1.48574
			1.606	-1.48793
			1.607	-1.49036
			1.608	-1.49302
			1.609	-1.49591
			1.61	-1.49902
			1.611	-1.50233
			1.612	-1.50585
			1.613	-1.50955
			1.614	-1.51344
			1.615	-1.51752
			1.616	-1.52178
			1.617	-1.52622
			1.618	-1.53085
			1.619	-1.53566
			1.62	-1.54064
			1.621	-1.54579
			1.622	-1.5511
			1.623	-1.55657
			1.624	-1.56215
			1.625	-1.56784
			1.626	-1.5736
			1.627	-1.5794
			1.628	-1.58519
			1.629	-1.59093
			1.63	-1.59655
			1.631	-1.60199
			1.632	-1.6072
			1.633	-1.61209
			1.634	-1.6166
			1.635	-1.62064
			1.636	-1.62415
			1.637	-1.62706
			1.638	-1.6293
			1.639	-1.6308
			1.64	-1.63151
			1.641	-1.63138
			1.642	-1.63038
			1.643	-1.62849
			1.644	-1.62568
			1.645	-1.62195
			1.646	-1.61732
			1.647	-1.6118
			1.648	-1.60542
			1.649	-1.59822
			1.65	-1.59026
			1.651	-1.5816
			1.652	-1.57231
			1.653	-1.56248
			1.654	-1.55218
			1.655	-1.54149
			1.656	-1.53052
			1.657	-1.51934
			1.658	-1.50806
			1.659	-1.49677
			1.66	-1.48555
			1.661	-1.47449
			1.662	-1.46368
			1.663	-1.45319
			1.664	-1.44309
			1.665	-1.43344
			1.666	-1.4243
			1.667	-1.41571
			1.668	-1.40773
			1.669	-1.4004
			1.67	-1.39373
			1.671	-1.38776
			1.672	-1.3825
			1.673	-1.37796
			1.674	-1.37413
			1.675	-1.37102
			1.676	-1.36861
			1.677	-1.36689
			1.678	-1.36583
			1.679	-1.36541
			1.68	-1.3656
			1.681	-1.36637
			1.682	-1.36768
			1.683	-1.3695
			1.684	-1.37178
			1.685	-1.37448
			1.686	-1.37755
			1.687	-1.38094
			1.688	-1.38461
			1.689	-1.38851
			1.69	-1.3926
			1.691	-1.39685
			1.692	-1.40121
			1.693	-1.40563
			1.694	-1.41009
			1.695	-1.41454
			1.696	-1.41897
			1.697	-1.42333
			1.698	-1.42761
			1.699	-1.43176
			1.7	-1.43576
			1.701	-1.43958
			1.702	-1.44319
			1.703	-1.44657
			1.704	-1.44969
			1.705	-1.45253
			1.706	-1.45505
			1.707	-1.45724
			1.708	-1.45907
			1.709	-1.46051
			1.71	-1.46154
			1.711	-1.46212
			1.712	-1.46224
			1.713	-1.46186
			1.714	-1.46098
			1.715	-1.45957
			1.716	-1.45762
			1.717	-1.45513
			1.718	-1.45211
			1.719	-1.44856
			1.72	-1.44448
			1.721	-1.4399
			1.722	-1.43484
			1.723	-1.42931
			1.724	-1.42336
			1.725	-1.41704
			1.726	-1.41039
			1.727	-1.40346
			1.728	-1.39631
			1.729	-1.38898
			1.73	-1.38152
			1.731	-1.374
			1.732	-1.36646
			1.733	-1.35896
			1.734	-1.35156
			1.735	-1.34429
			1.736	-1.33721
			1.737	-1.33034
			1.738	-1.32373
			1.739	-1.31739
			1.74	-1.31137
			1.741	-1.30568
			1.742	-1.30035
			1.743	-1.29538
			1.744	-1.29079
			1.745	-1.28658
			1.746	-1.28277
			1.747	-1.27937
			1.748	-1.27638
			1.749	-1.2738
			1.75	-1.27165
			1.751	-1.26992
			1.752	-1.26862
			1.753	-1.26775
			1.754	-1.26732
			1.755	-1.26731
			1.756	-1.26773
			1.757	-1.26856
			1.758	-1.26981
			1.759	-1.27145
			1.76	-1.27347
			1.761	-1.27583
			1.762	-1.27851
			1.763	-1.28146
			1.764	-1.28464
			1.765	-1.28803
			1.766	-1.29155
			1.767	-1.29515
			1.768	-1.29878
			1.769	-1.30239
			1.77	-1.30592
			1.771	-1.30933
			1.772	-1.31255
			1.773	-1.31555
			1.774	-1.31828
			1.775	-1.3207
			1.776	-1.32281
			1.777	-1.32458
			1.778	-1.32601
			1.779	-1.32711
			1.78	-1.32791
			1.781	-1.32843
			1.782	-1.32872
			1.783	-1.32881
			1.784	-1.32878
			1.785	-1.32867
			1.786	-1.32855
			1.787	-1.3285
			1.788	-1.32857
			1.789	-1.32884
			1.79	-1.32936
			1.791	-1.33021
			1.792	-1.33143
			1.793	-1.33307
			1.794	-1.33515
			1.795	-1.33769
			1.796	-1.34071
			1.797	-1.34419
			1.798	-1.34812
			1.799	-1.35247
			1.8	-1.3572
			1.801	-1.36225
			1.802	-1.36756
			1.803	-1.37306
			1.804	-1.37868
			1.805	-1.38434
			1.806	-1.38996
			1.807	-1.39546
			1.808	-1.40077
			1.809	-1.4058
			1.81	-1.41049
			1.811	-1.41479
			1.812	-1.41865
			1.813	-1.42204
			1.814	-1.42494
			1.815	-1.42733
			1.816	-1.42923
			1.817	-1.43065
			1.818	-1.43161
			1.819	-1.43217
			1.82	-1.43236
			1.821	-1.43225
			1.822	-1.43189
			1.823	-1.43135
			1.824	-1.43071
			1.825	-1.43001
			1.826	-1.42933
			1.827	-1.42872
			1.828	-1.42824
			1.829	-1.42791
			1.83	-1.42776
			1.831	-1.42782
			1.832	-1.42808
			1.833	-1.42855
			1.834	-1.42921
			1.835	-1.43004
			1.836	-1.43099
			1.837	-1.43204
			1.838	-1.43312
			1.839	-1.43419
			1.84	-1.43518
			1.841	-1.43604
			1.842	-1.43672
			1.843	-1.43717
			1.844	-1.43735
			1.845	-1.43722
			1.846	-1.43675
			1.847	-1.43592
			1.848	-1.43471
			1.849	-1.43312
			1.85	-1.43117
			1.851	-1.42887
			1.852	-1.42624
			1.853	-1.4233
			1.854	-1.4201
			1.855	-1.41668
			1.856	-1.41307
			1.857	-1.40933
			1.858	-1.4055
			1.859	-1.40161
			1.86	-1.39771
			1.861	-1.39384
			1.862	-1.39004
			1.863	-1.38633
			1.864	-1.38273
			1.865	-1.37925
			1.866	-1.37591
			1.867	-1.37272
			1.868	-1.36968
			1.869	-1.36678
			1.87	-1.36402
			1.871	-1.36139
			1.872	-1.35887
			1.873	-1.35646
			1.874	-1.35415
			1.875	-1.35192
			1.876	-1.34977
			1.877	-1.34769
			1.878	-1.34568
			1.879	-1.34375
			1.88	-1.3419
			1.881	-1.34016
			1.882	-1.33854
			1.883	-1.33705
			1.884	-1.33571
			1.885	-1.33454
			1.886	-1.3336
			1.887	-1.33291
			1.888	-1.33249
			1.889	-1.33239
			1.89	-1.33262
			1.891	-1.33323
			1.892	-1.33423
			1.893	-1.33564
			1.894	-1.33749
			1.895	-1.33979
			1.896	-1.34254
			1.897	-1.34574
			1.898	-1.34939
			1.899	-1.35347
			1.9	-1.35797
			1.901	-1.36289
			1.902	-1.36819
			1.903	-1.37385
			1.904	-1.37984
			1.905	-1.38614
			1.906	-1.3927
			1.907	-1.39951
			1.908	-1.40652
			1.909	-1.41371
			1.91	-1.42105
			1.911	-1.4285
			1.912	-1.43605
			1.913	-1.44366
			1.914	-1.45131
			1.915	-1.45896
			1.916	-1.4666
			1.917	-1.4742
			1.918	-1.48172
			1.919	-1.48913
			1.92	-1.4964
			1.921	-1.50348
			1.922	-1.51036
			1.923	-1.51698
			1.924	-1.52333
			1.925	-1.52934
			1.926	-1.53498
			1.927	-1.54021
			1.928	-1.54499
			1.929	-1.54928
			1.93	-1.55305
			1.931	-1.55628
			1.932	-1.55894
			1.933	-1.561
			1.934	-1.56247
			1.935	-1.56334
			1.936	-1.56362
			1.937	-1.56331
			1.938	-1.56245
			1.939	-1.56106
			1.94	-1.55918
			1.941	-1.55685
			1.942	-1.55411
			1.943	-1.55102
			1.944	-1.54763
			1.945	-1.544
			1.946	-1.54018
			1.947	-1.53622
			1.948	-1.53218
			1.949	-1.52811
			1.95	-1.52404
			1.951	-1.52002
			1.952	-1.51608
			1.953	-1.51225
			1.954	-1.50854
			1.955	-1.50496
			1.956	-1.50152
			1.957	-1.49822
			1.958	-1.49504
			1.959	-1.49199
			1.96	-1.48902
			1.961	-1.48613
			1.962	-1.48329
			1.963	-1.48048
			1.964	-1.47768
			1.965	-1.47486
			1.966	-1.47201
			1.967	-1.4691
			1.968	-1.46613
			1.969	-1.46309
			1.97	-1.45997
			1.971	-1.45679
			1.972	-1.45353
			1.973	-1.45023
			1.974	-1.44688
			1.975	-1.44351
			1.976	-1.44012
			1.977	-1.43676
			1.978	-1.43344
			1.979	-1.43018
			1.98	-1.427
			1.981	-1.42393
			1.982	-1.42097
			1.983	-1.41815
			1.984	-1.41548
			1.985	-1.41295
			1.986	-1.41058
			1.987	-1.40836
			1.988	-1.4063
			1.989	-1.4044
			1.99	-1.40267
			1.991	-1.40109
			1.992	-1.39967
			1.993	-1.3984
			1.994	-1.3973
			1.995	-1.39636
			1.996	-1.39561
			1.997	-1.39506
			1.998	-1.39473
			1.999	-1.39465
[truncated: 90,163 more rows]
