# Supplementary material for: The fluoride permeation pathway and anion recognition in Fluc family fluoride channels
Source: eLife. 2021 Jul 12;10:e69482. doi: 10.7554/eLife.69482 (PMC8315801; doi:10.7554/eLife.69482)
Supplement: Figure 3—source data 3. [file elife-69482-fig3-data3.xlsx]

## Sheet: Sheet1
Fluc-Bpe		Y104F	0	6.958e-05	7.6904e-05	6.5918e-05		Y104W	0	0.0113525	0.00914307	0.0108521		Y104S	0	0.000402124	0.00033	-1.3428e-05		Y104H	0	1.22324e-05	0.00441895	-3.0518e-05		Y104I	0	2.6855e-05	4.1504e-05			E88D	0	0.00044678	0.00047363	0.00631104	0.00560303		E88Q	0	0.000294118	0.00350282	0.00235294		E88A	0	0.0031567	0.0035278	0.0011755
F- dump			0.1	7.0801e-05	7.6904e-05	6.4697e-05			0.1	0.0113647	0.00914307	0.0108643			0.1	-0.00886191	0.00033	-1.3428e-05			0.1	-0.00744954	0.00437012	-3.0518e-05			0.1	2.8076e-05	4.0283e-05				0.1	0.000448	0.00047241	0.00629883	0.00559082			0.1	-0.0140588	-0.00338983	-0.00482353			0.1	0.0031506	0.0035229	0.0011646
			0.2	7.0801e-05	7.8125e-05	6.4697e-05			0.2	0.0113281	0.00911865	0.0108643			0.2	-0.00886191	0.00033	-1.4648e-05			0.2	1.22324e-05	0.00435791	-3.1738e-05			0.2	2.5635e-05	4.0283e-05				0.2	0.000448	0.00047241	0.00626221	0.00557861			0.2	-0.00688235	-0.0102825	-0.012			0.2	0.0031494	0.0035559	0.0011438
			0.3	7.0801e-05	7.8125e-05	6.5918e-05			0.3	0.0113525	0.00911865	0.0108032			0.3	-0.00886191	0.00033	-1.3428e-05			0.3	1.22324e-05	0.00437012	-3.0518e-05			0.3	2.1973e-05	4.1504e-05				0.3	0.000448	0.00047241	0.00626221	0.00559082			0.3	-0.0140588	-0.00338983	-0.00482353			0.3	0.0031506	0.0035754	0.0011523
			0.4	7.0801e-05	7.6904e-05	6.5918e-05			0.4	0.0113403	0.00915527	0.0108887			0.4	0.000402124	0.00033	-1.3428e-05			0.4	1.22324e-05	0.00437012	-3.0518e-05			0.4	2.1973e-05	4.1504e-05				0.4	0.00044678	0.00047241	0.00610352	0.00561523			0.4	0.000294118	-0.0171751	-0.00482353			0.4	0.0031702	0.0035767	0.0011438
			0.5	7.0801e-05	7.6904e-05	6.4697e-05			0.5	0.0113525	0.00911865	0.0108643			0.5	-0.00886191	0.00033	-1.3428e-05			0.5	1.22324e-05	0.00439453	-3.1738e-05			0.5	2.3193e-05	3.9063e-05				0.5	0.00044922	0.00047241	0.0060791	0.00562744			0.5	-0.00688235	-0.00338983	-0.00482353			0.5	0.0031726	0.0035706	0.0011536
			0.6	7.2021e-05	7.6904e-05	6.5918e-05			0.6	0.0113647	0.00919189	0.0108887			0.6	-0.00886191	0.000331	-1.3428e-05			0.6	1.22324e-05	0.00445557	-3.1738e-05			0.6	2.3193e-05	4.0283e-05				0.6	0.00044678	0.00047119	0.00614014	0.00561523			0.6	0.000294118	-0.00338983	-0.012			0.6	0.0031665	0.0035803	0.0011584
			0.7	7.0801e-05	7.8125e-05	6.5918e-05			0.7	0.0113159	0.00915527	0.0108887			0.7	-0.00886191	0.00033	-1.3428e-05			0.7	1.22324e-05	0.00447998	-3.1738e-05			0.7	2.4414e-05	4.0283e-05				0.7	0.000448	0.00047119	0.00621338	0.00562744			0.7	-0.0140588	-0.0102825	-0.00482353			0.7	0.0031738	0.0035779	0.0011548
			0.8	6.958e-05	7.8125e-05	6.4697e-05			0.8	0.0113647	0.00916748	0.0108887			0.8	0.000402124	0.000331	-1.3428e-05			0.8	0.00748012	0.00446777	-3.1738e-05			0.8	2.1973e-05	4.1504e-05				0.8	0.00044678	0.00047241	0.00628662	0.00560303			0.8	-0.0212353	0.00350282	-0.012			0.8	0.0031775	0.003562	0.0011548
			0.9	6.958e-05	7.6904e-05	6.4697e-05			0.9	0.0114868	0.00917969	0.0108398			0.9	0.000402124	0.000328	-1.3428e-05			0.9	1.22324e-05	0.00449219	-3.1738e-05			0.9	2.3193e-05	4.1504e-05				0.9	0.00044678	0.00047119	0.00632324	0.00562744			0.9	-0.0140588	-0.0102825	-0.00482353			0.9	0.0031616	0.0035803	0.0011584
			1	7.0801e-05	7.8125e-05	6.4697e-05			1	0.0115723	0.00916748	0.0109009			1	-0.00886191	0.00033	-1.3428e-05			1	-0.00744954	0.00443115	-3.1738e-05			1	2.1973e-05	4.0283e-05				1	0.000448	0.00047119	0.00632324	0.00562744			1	0.000294118	0.00350282	-0.012			1	0.0031702	0.0035681	0.0011682
			1.1	7.0801e-05	7.8125e-05	6.4697e-05			1.1	0.0115723	0.00910645	0.0109009			1.1	-0.0181259	0.000328	-1.3428e-05			1.1	1.22324e-05	0.00443115	-3.1738e-05			1.1	2.0752e-05	4.1504e-05				1.1	0.00044678	0.00046997	0.00632324	0.00562744			1.1	-0.00688235	-0.0102825	-0.00482353			1.1	0.003175	0.003573	0.0011682
			1.2	7.0801e-05	7.8125e-05	6.4697e-05			1.2	0.0115356	0.00917969	0.0109131			1.2	-0.00886191	0.00033	-1.3428e-05			1.2	1.22324e-05	0.00443115	-3.1738e-05			1.2	1.9531e-05	4.1504e-05				1.2	0.000448	0.00047241	0.00631104	0.00562744			1.2	-0.00688235	-0.0102825	-0.012			1.2	0.0031726	0.0035706	0.0011694
			1.3	7.0801e-05	7.8125e-05	6.5918e-05			1.3	0.0115234	0.00916748	0.0108765			1.3	-0.00886191	0.00033	-1.3428e-05			1.3	-0.00744954	0.00445557	-3.1738e-05			1.3	1.8311e-05	4.1504e-05				1.3	0.00044678	0.00047241	0.00631104	0.00562744			1.3	0.000294118	0.00350282	-0.00482353			1.3	0.0031653	0.0035352	0.0011719
			1.4	7.2021e-05	7.6904e-05	6.5918e-05			1.4	0.0115234	0.00916748	0.0108643			1.4	-0.00886191	0.000331	-1.2207e-05			1.4	1.22324e-05	0.00444336	-3.0518e-05			1.4	1.8311e-05	4.0283e-05				1.4	0.00044678	0.00047119	0.00634766	0.00562744			1.4	-0.0140588	0.00350282	0.00235294			1.4	0.0031604	0.0035022	0.0011804
			1.5	7.2021e-05	7.5684e-05	6.5918e-05			1.5	0.0115356	0.00919189	0.0108887			1.5	-0.0181259	0.000332	-1.3428e-05			1.5	-0.00744954	0.00450439	-3.1738e-05			1.5	1.8311e-05	4.0283e-05				1.5	0.000448	0.00047119	0.00637207	0.00561523			1.5	-0.00688235	-0.00338983	-0.00482353			1.5	0.0031592	0.0035046	0.0011584
			1.6	6.958e-05	7.6904e-05	6.4697e-05			1.6	0.0115601	0.00917969	0.0109985			1.6	-0.00886191	0.00033	-1.3428e-05			1.6	1.22324e-05	0.00450439	-3.1738e-05			1.6	1.8311e-05	3.9063e-05				1.6	0.000448	0.00047363	0.00638428	0.00561523			1.6	-0.0140588	-0.00338983	-0.012			1.6	0.0031531	0.0035071	0.0011646
			1.7	6.8359e-05	7.5684e-05	6.5918e-05			1.7	0.0115479	0.00914307	0.0109863			1.7	-0.00886191	0.000331	-1.3428e-05			1.7	-0.00744954	0.00452881	-3.1738e-05			1.7	1.8311e-05	4.1504e-05				1.7	0.00044678	0.00047241	0.00635986	0.00561523			1.7	-0.00688235	-0.0102825	-0.012			1.7	0.0031665	0.0035144	0.0011743
			1.8	7.0801e-05	7.6904e-05	6.7139e-05			1.8	0.0115112	0.00921631	0.0110352			1.8	-0.00886191	0.000332	-1.3428e-05			1.8	1.22324e-05	0.00454102	-3.0518e-05			1.8	1.8311e-05	4.0283e-05				1.8	0.00044556	0.00047363	0.00634766	0.00561523			1.8	-0.00688235	-0.0102825	-0.00482353			1.8	0.0031555	0.0034729	0.0011743
			1.9	7.0801e-05	7.5684e-05	6.5918e-05			1.9	0.0114868	0.00916748	0.0110107			1.9	-0.00886191	0.00033	-1.4648e-05			1.9	-0.00744954	0.00454102	-3.0518e-05			1.9	1.8311e-05	4.0283e-05				1.9	0.000448	0.00047363	0.00626221	0.00561523			1.9	-0.00688235	0.00350282	-0.012			1.9	0.0031604	0.0034705	0.0011707
			2	6.958e-05	7.6904e-05	6.5918e-05			2	0.011499	0.00915527	0.0109253			2	-0.00886191	0.000331	-1.3428e-05			2	-0.00744954	0.00455322	-3.1738e-05			2	1.8311e-05	4.1504e-05				2	0.000448	0.00047241	0.00626221	0.00561523			2	-0.00688235	-0.0102825	-0.012			2	0.0031628	0.0034863	0.001178
			2.1	6.958e-05	7.6904e-05	6.4697e-05			2.1	0.0114868	0.00914307	0.0108643			2.1	-0.00886191	0.00033	-1.3428e-05			2.1	-0.00744954	0.00455322	-3.0518e-05			2.1	1.8311e-05	4.1504e-05				2.1	0.00044678	0.00047241	0.00626221	0.00559082			2.1	-0.00688235	-0.0102825	-0.00482353			2.1	0.0031567	0.0034827	0.0011572
			2.2	6.958e-05	7.8125e-05	6.5918e-05			2.2	0.0115601	0.00915527	0.0109253			2.2	-0.00886191	0.00033	-1.4648e-05			2.2	1.22324e-05	0.00455322	-2.9297e-05			2.2	1.8311e-05	4.2725e-05				2.2	0.000448	0.00047241	0.00629883	0.00559082			2.2	-0.00688235	-0.0171751	0.00235294			2.2	0.0031555	0.0034985	0.0011731
			2.3	7.0801e-05	7.8125e-05	6.7139e-05			2.3	0.0115723	0.00913086	0.0109131			2.3	-0.00886191	0.000328	-1.3428e-05			2.3	-0.00744954	0.00455322	-3.0518e-05			2.3	1.8311e-05	4.0283e-05				2.3	0.000448	0.00047241	0.00637207	0.00560303			2.3	-0.0140588	-0.0171751	-0.00482353			2.3	0.0031689	0.0034741	0.0011792
			2.4	6.958e-05	7.8125e-05	6.4697e-05			2.4	0.0115845	0.00915527	0.0109375			2.4	-0.0181259	0.000331	-1.3428e-05			2.4	1.22324e-05	0.00460205	-3.1738e-05			2.4	1.9531e-05	4.0283e-05				2.4	0.00044678	0.00047119	0.00635986	0.00560303			2.4	-0.00688235	0.00350282	-0.012			2.4	0.0031799	0.0035034	0.0011768
			2.5	6.958e-05	7.8125e-05	6.3477e-05			2.5	0.0116089	0.00915527	0.0109009			2.5	0.000402124	0.00033	-1.4648e-05			2.5	1.22324e-05	0.00460205	-3.0518e-05			2.5	1.9531e-05	4.0283e-05				2.5	0.000448	0.00047241	0.00637207	0.00560303			2.5	-0.00688235	-0.0102825	-0.012			2.5	0.0031726	0.0036658	0.0011755
			2.6	7.0801e-05	7.6904e-05	6.4697e-05			2.6	0.0115845	0.00915527	0.0108887			2.6	0.000402124	0.00033	-1.3428e-05			2.6	1.22324e-05	0.00458984	-3.0518e-05			2.6	1.9531e-05	4.0283e-05				2.6	0.000448	0.00047363	0.0064209	0.00557861			2.6	-0.0212353	-0.00338983	-0.00482353			2.6	0.0031775	0.0038196	0.0011804
			2.7	7.0801e-05	7.6904e-05	6.4697e-05			2.7	0.0115601	0.00919189	0.0108765			2.7	-0.00886191	0.000332	-1.3428e-05			2.7	1.22324e-05	0.00455322	-3.0518e-05			2.7	2.0752e-05	4.0283e-05				2.7	0.000448	0.00047119	0.00645752	0.00557861			2.7	-0.00688235	0.00350282	-0.00482353			2.7	0.0031775	0.0039221	0.0011633
			2.8	7.0801e-05	7.8125e-05	6.5918e-05			2.8	0.0116089	0.00928955	0.0108887			2.8	-0.00886191	0.000331	-1.3428e-05			2.8	-0.00744954	0.00457764	-3.0518e-05			2.8	1.9531e-05	4.0283e-05				2.8	0.000448	0.00047119	0.00639648	0.00563965			2.8	-0.0140588	-0.0171751	-0.012			2.8	0.0031543	0.0039917	0.0011609
			2.9	6.958e-05	7.8125e-05	6.4697e-05			2.9	0.0115356	0.0092041	0.0109497			2.9	0.000402124	0.000331	-1.3428e-05			2.9	-0.00744954	0.00458984	-3.1738e-05			2.9	1.9531e-05	4.0283e-05				2.9	0.00044922	0.00047119	0.00640869	0.00563965			2.9	-0.0212353	-0.00338983	-0.00482353			2.9	0.0031677	0.004032	0.0011938
			3	6.958e-05	7.9346e-05	6.4697e-05			3	0.0115479	0.00916748	0.0109619			3	-0.00886191	0.00033	-1.3428e-05			3	1.22324e-05	0.00462646	-3.1738e-05			3	1.9531e-05	4.2725e-05				3	0.00044678	0.00047363	0.00639648	0.00565186			3	-0.00688235	-0.0102825	-0.00482353			3	0.0031738	0.0040698	0.0011865
			3.1	7.0801e-05	7.8125e-05	6.4697e-05			3.1	0.0115601	0.0092041	0.0109375			3.1	-0.00886191	0.000331	-1.3428e-05			3.1	1.22324e-05	0.00458984	-3.0518e-05			3.1	1.9531e-05	4.0283e-05				3.1	0.000448	0.00047241	0.00635986	0.00561523			3.1	-0.00688235	-0.0102825	0.00235294			3.1	0.0031763	0.0041321	0.0011963
			3.2	7.0801e-05	7.9346e-05	6.7139e-05			3.2	0.0115356	0.00916748	0.0109131			3.2	-0.00886191	0.000331	-1.3428e-05			3.2	-0.00744954	0.00458984	-3.1738e-05			3.2	1.9531e-05	4.0283e-05				3.2	0.00044922	0.00047241	0.00635986	0.00560303			3.2	-0.00688235	-0.0102825	-0.00482353			3.2	0.0031775	0.0042065	0.0011975
			3.3	6.958e-05	7.9346e-05	6.5918e-05			3.3	0.0114868	0.00922852	0.0108887			3.3	-0.0181259	0.00033	-1.3428e-05			3.3	1.22324e-05	0.00460205	-3.0518e-05			3.3	1.9531e-05	4.1504e-05				3.3	0.00044678	0.00047363	0.00635986	0.00559082			3.3	0.000294118	-0.0102825	-0.00482353			3.3	0.0031641	0.0042676	0.0011951
			3.4	7.0801e-05	7.9346e-05	6.5918e-05			3.4	0.0115356	0.00921631	0.0109741			3.4	0.000402124	0.00033	-1.4648e-05			3.4	1.22324e-05	0.00460205	-3.1738e-05			3.4	1.9531e-05	4.1504e-05				3.4	0.00044678	0.00047241	0.00628662	0.00560303			3.4	-0.0140588	-0.0102825	0.00235294			3.4	0.0031592	0.0043677	0.0011804
			3.5	6.958e-05	7.8125e-05	6.5918e-05			3.5	0.011499	0.00921631	0.0109497			3.5	-0.00886191	0.000328	-1.3428e-05			3.5	-0.00744954	0.00458984	-3.1738e-05			3.5	1.9531e-05	4.1504e-05				3.5	0.000448	0.00047363	0.00629883	0.00560303			3.5	-0.0140588	-0.0102825	0.00235294			3.5	0.0031531	0.004425	0.0012012
			3.6	6.8359e-05	7.8125e-05	6.8359e-05			3.6	0.0115356	0.00914307	0.0108887			3.6	-0.00886191	0.000332	-1.3428e-05			3.6	-0.00744954	0.00461426	-3.0518e-05			3.6	1.9531e-05	4.0283e-05				3.6	0.000448	0.00047241	0.00640869	0.00559082			3.6	-0.00688235	-0.0171751	0.00235294			3.6	0.0031616	0.0044751	0.0011926
			3.7	6.958e-05	7.8125e-05	6.7139e-05			3.7	0.0115479	0.00921631	0.0109253			3.7	-0.0181259	0.000331	-1.3428e-05			3.7	-0.00744954	0.00456543	-3.1738e-05			3.7	2.0752e-05	3.9063e-05				3.7	0.00044678	0.00047119	0.00639648	0.00560303			3.7	-0.0140588	-0.0171751	0.00235294			3.7	0.0031555	0.0045215	0.0011523
			3.8	6.958e-05	7.8125e-05	6.5918e-05			3.8	0.011499	0.00917969	0.0109131			3.8	-0.0181259	0.00033	-1.3428e-05			3.8	-0.00744954	0.00456543	-3.1738e-05			3.8	1.9531e-05	4.2725e-05				3.8	0.00044922	0.00047241	0.00646973	0.00557861			3.8	-0.00688235	-0.0240678	0.00235294			3.8	0.0031506	0.0045776	0.001145
			3.9	6.958e-05	7.8125e-05	6.5918e-05			3.9	0.0114868	0.0092041	0.0108765			3.9	-0.00886191	0.00033	-1.3428e-05			3.9	-0.00744954	0.00455322	-3.1738e-05			3.9	2.0752e-05	4.1504e-05				3.9	0.000448	0.00047363	0.0064209	0.00559082			3.9	-0.0212353	-0.0102825	0.00952941			3.9	0.0031384	0.0046533	0.0011353
			4	6.958e-05	7.5684e-05	6.8359e-05			4	0.0115356	0.00917969	0.0108521			4	-0.00886191	0.000331	-1.3428e-05			4	-0.00744954	0.00455322	-3.0518e-05			4	2.0752e-05	4.0283e-05				4	0.00044678	0.00047363	0.0064209	0.00565186			4	0.000294118	-0.00338983	0.00235294			4	0.0031458	0.0047314	0.0011377
			4.1	6.958e-05	7.4463e-05	6.8359e-05			4.1	0.0115234	0.00915527	0.0109253			4.1	-0.0181259	0.000331	-1.3428e-05			4.1	-0.00744954	0.0045166	-3.2959e-05			4.1	2.0752e-05	4.1504e-05				4.1	0.000448	0.00047363	0.00633545	0.00566406			4.1	-0.0140588	-0.0171751	0.00235294			4.1	0.0031384	0.0047925	0.0011902
			4.2	6.958e-05	7.8125e-05	6.7139e-05			4.2	0.011499	0.00911865	0.0109131			4.2	-0.0181259	0.000331	-1.4648e-05			4.2	-0.00744954	0.00456543	-3.1738e-05			4.2	2.0752e-05	3.9063e-05				4.2	0.000448	0.00047363	0.00633545	0.00565186			4.2	-0.0140588	0.00350282	0.00235294			4.2	0.0031616	0.004845	0.0012122
			4.3	6.958e-05	7.6904e-05	6.7139e-05			4.3	0.0115112	0.00915527	0.0109375			4.3	-0.00886191	0.00033	-1.3428e-05			4.3	-0.00744954	0.00454102	-3.1738e-05			4.3	2.0752e-05	4.1504e-05				4.3	0.00044678	0.00047241	0.00633545	0.00565186			4.3	-0.0212353	-0.0171751	0.00952941			4.3	0.003158	0.0048877	0.0012573
			4.4	6.958e-05	7.6904e-05	6.5918e-05			4.4	0.011499	0.00914307	0.0109985			4.4	-0.00886191	0.00033	-1.3428e-05			4.4	1.22324e-05	0.00455322	-3.1738e-05			4.4	1.9531e-05	4.0283e-05				4.4	0.00044922	0.00047241	0.00633545	0.00566406			4.4	-0.0140588	-0.0102825	0.00235294			4.4	0.0031604	0.0049512	0.0013574
			4.5	6.958e-05	7.5684e-05	6.8359e-05			4.5	0.0114868	0.00914307	0.0109497			4.5	-0.00886191	0.00033	-1.3428e-05			4.5	-0.00744954	0.00455322	-3.1738e-05			4.5	1.9531e-05	4.1504e-05				4.5	0.000448	0.00047241	0.00633545	0.00567627			4.5	-0.0140588	-0.00338983	0.00235294			4.5	0.0031592	0.0049463	0.0014832
			4.6	7.0801e-05	7.8125e-05	6.7139e-05			4.6	0.0115601	0.00911865	0.0108765			4.6	-0.00886191	0.000332	-1.5869e-05			4.6	-0.00744954	0.00456543	-3.2959e-05			4.6	1.9531e-05	4.0283e-05				4.6	0.000448	0.00047119	0.00637207	0.00568848			4.6	-0.0140588	-0.0102825	-0.00482353			4.6	0.0031482	0.0049915	0.0015942
			4.7	6.958e-05	7.6904e-05	6.7139e-05			4.7	0.0115723	0.00908203	0.0109375			4.7	-0.00886191	0.000331	-1.4648e-05			4.7	-0.00744954	0.00457764	-3.1738e-05			4.7	1.9531e-05	4.0283e-05				4.7	0.00044922	0.00047241	0.00637207	0.00568848			4.7	-0.00688235	-0.0102825	0.00235294			4.7	0.0031274	0.0050403	0.0017017
			4.8	6.958e-05	7.8125e-05	6.7139e-05			4.8	0.0115356	0.00906982	0.0109253			4.8	0.000402124	0.000328	-1.4648e-05			4.8	1.22324e-05	0.00473633	-3.1738e-05			4.8	1.8311e-05	4.0283e-05				4.8	0.000448	0.00047241	0.00639648	0.00566406			4.8	0.0146471	-0.0102825	0.00235294			4.8	0.0031409	0.0050537	0.0017896
			4.9	6.958e-05	7.5684e-05	6.7139e-05			4.9	0.011499	0.00910645	0.0109741			4.9	-0.00886191	0.000331	-1.3428e-05			4.9	1.22324e-05	0.00469971	-3.1738e-05			4.9	1.9531e-05	4.0283e-05				4.9	0.000448	0.00047119	0.00639648	0.00563965			4.9	0.0505882	-0.0102825	0.00235294			4.9	0.0031458	0.005072	0.0018054
			5	7.3242e-05	7.6904e-05	6.8359e-05			5	0.0115112	0.00910645	0.0109985			5	0.000402124	0.00033	-1.3428e-05			5	-0.00744954	0.00469971	-3.1738e-05			5	2.0752e-05	4.0283e-05				5	0.000448	0.00047241	0.00640869	0.00566406			5	0.0577647	0.00350282	0.00952941			5	0.003147	0.0050879	0.0018127
			5.1	7.2021e-05	7.6904e-05	6.958e-05			5.1	0.0114624	0.00908203	0.0110107			5.1	-0.00886191	0.00033	-1.4648e-05			5.1	1.22324e-05	0.00463867	-3.1738e-05			5.1	2.0752e-05	4.1504e-05				5.1	0.00044922	0.00047241	0.00640869	0.00565186			5.1	0.0721176	0.0310734	0.00235294			5.1	0.0031458	0.0051086	0.0018188
			5.2	7.2021e-05	7.8125e-05	6.7139e-05			5.2	0.0114624	0.00910645	0.0109131			5.2	-0.00886191	0.000331	-1.4648e-05			5.2	0.00748012	0.00462646	-3.1738e-05			5.2	2.0752e-05	4.1504e-05				5.2	0.00044922	0.00047241	0.00638428	0.00565186			5.2	0.0864706	0.0379661	0.00235294			5.2	0.0031604	0.0051062	0.0018201
			5.3	7.2021e-05	7.6904e-05	6.7139e-05			5.3	0.0114746	0.00914307	0.0109619			5.3	0.000402124	0.00033	-1.4648e-05			5.3	1.22324e-05	0.00462646	-3.1738e-05			5.3	2.0752e-05	4.0283e-05				5.3	0.00044922	0.00047363	0.00640869	0.00565186			5.3	0.108	0.0517514	0.0167059			5.3	0.0031592	0.0051709	0.0017932
			5.4	7.3242e-05	7.8125e-05	6.8359e-05			5.4	0.0114868	0.00906982	0.0108765			5.4	-0.00886191	0.000331	-1.3428e-05			5.4	-0.00744954	0.00461426	-3.0518e-05			5.4	2.0752e-05	4.0283e-05				5.4	0.000448	0.00047485	0.00638428	0.00563965			5.4	0.100824	0.0655932	0.0310588			5.4	0.0031433	0.0052136	0.001803
			5.5	7.0801e-05	7.6904e-05	6.7139e-05			5.5	0.0114258	0.00908203	0.0109253			5.5	0.000402124	0.000328	-1.4648e-05			5.5	1.22324e-05	0.00462646	-3.0518e-05			5.5	2.0752e-05	4.0283e-05				5.5	0.000448	0.00047241	0.00639648	0.00563965			5.5	0.115176	0.0793785	0.0885294			5.5	0.0031628	0.0052478	0.001792
			5.6	7.2021e-05	7.8125e-05	6.4697e-05			5.6	0.0114502	0.00906982	0.0109253			5.6	0.000402124	0.000328	-1.4648e-05			5.6	1.22324e-05	0.00461426	-3.0518e-05			5.6	1.9531e-05	4.1504e-05				5.6	0.000448	0.00047241	0.00644531	0.00562744			5.6	0.122353	0.0793785	0.117235			5.6	0.0031665	0.0052698	0.0017603
			5.7	7.3242e-05	7.8125e-05	6.4697e-05			5.7	0.0114624	0.00909424	0.0109375			5.7	0.000402124	0.000328	-1.3428e-05			5.7	1.22324e-05	0.00460205	-3.1738e-05			5.7	2.0752e-05	4.0283e-05				5.7	0.000448	0.00047363	0.00640869	0.00566406			5.7	0.129588	0.106949	0.167529			5.7	0.0031738	0.0053101	0.0017371
			5.8	7.3242e-05	7.6904e-05	6.7139e-05			5.8	0.011438	0.00914307	0.0109497			5.8	0.000402124	0.00033	-1.4648e-05			5.8	1.22324e-05	0.00463867	-3.0518e-05			5.8	2.0752e-05	4.1504e-05				5.8	0.000448	0.00047363	0.00644531	0.00566406			5.8	0.143941	0.113842	0.181882			5.8	0.0031824	0.0053113	0.0017346
			5.9	7.5684e-05	7.6904e-05	6.7139e-05			5.9	0.0114868	0.00911865	0.0109863			5.9	0.000402124	0.000331	-1.4648e-05			5.9	-0.00744954	0.00460205	-3.1738e-05			5.9	2.0752e-05	4.1504e-05				5.9	0.00044922	0.00047363	0.00644531	0.00567627			5.9	0.151118	0.120734	0.203412			5.9	0.0031824	0.0053113	0.0017212
			6	7.5684e-05	7.8125e-05	6.5918e-05			6	0.0114136	0.00909424	0.0109985			6	-0.00886191	0.000328	-1.4648e-05			6	-0.00744954	0.00461426	-3.1738e-05			6	2.0752e-05	4.1504e-05				6	0.00044922	0.00047363	0.00644531	0.00567627			6	0.151118	0.141412	0.217765			6	0.0031775	0.0053308	0.0017273
			6.1	7.6904e-05	7.6904e-05	6.7139e-05			6.1	0.0114136	0.00911865	0.0110107			6.1	0.000402124	0.00033	-1.4648e-05			6.1	1.22324e-05	0.00465088	-3.1738e-05			6.1	1.9531e-05	4.1504e-05				6.1	0.00044922	0.00047485	0.00639648	0.00566406			6.1	0.165471	0.155198	0.246471			6.1	0.0032324	0.005365	0.0017761
			6.2	7.6904e-05	7.6904e-05	6.7139e-05			6.2	0.0114258	0.00910645	0.0110229			6.2	0.000402124	0.00033	-1.4648e-05			6.2	-0.00744954	0.00465088	-3.1738e-05			6.2	2.0752e-05	4.0283e-05				6.2	0.00044922	0.00047485	0.00639648	0.00566406			6.2	0.172647	0.148305	0.253647			6.2	0.0032703	0.0053906	0.0018323
			6.3	7.6904e-05	7.8125e-05	6.958e-05			6.3	0.0114502	0.00913086	0.0110229			6.3	0.000402124	0.00033	-1.4648e-05			6.3	1.22324e-05	0.00463867	-3.0518e-05			6.3	1.9531e-05	4.0283e-05				6.3	0.00045044	0.00047729	0.0064209	0.00566406			6.3	0.172647	0.155198	0.232118			6.3	0.0033313	0.0054211	0.0019031
			6.4	7.8125e-05	7.6904e-05	6.7139e-05			6.4	0.011377	0.00911865	0.0109863			6.4	0.000402124	0.000331	-1.4648e-05			6.4	-0.00744954	0.00462646	-3.1738e-05			6.4	2.0752e-05	4.0283e-05				6.4	0.00044922	0.00047729	0.00643311	0.00563965			6.4	0.179824	0.141412	0.232118			6.4	0.0033447	0.0054419	0.0019775
			6.5	7.6904e-05	7.8125e-05	6.7139e-05			6.5	0.0114746	0.00910645	0.0109985			6.5	0.000402124	0.00033	-1.4648e-05			6.5	-0.00744954	0.00462646	-3.0518e-05			6.5	1.9531e-05	4.1504e-05				6.5	0.00045166	0.00047852	0.00639648	0.00565186			6.5	0.194176	0.141412	0.253647			6.5	0.0033203	0.0054492	0.0020251
			6.6	7.8125e-05	7.8125e-05	6.7139e-05			6.6	0.0114502	0.00910645	0.011084			6.6	0.00965857	0.00033	-1.3428e-05			6.6	1.22324e-05	0.00463867	-3.0518e-05			6.6	1.9531e-05	4.2725e-05				6.6	0.00045044	0.00047729	0.00637207	0.00562744			6.6	0.187	0.162147	0.260882			6.6	0.0032886	0.0054822	0.002063
			6.7	7.8125e-05	7.9346e-05	6.7139e-05			6.7	0.0114258	0.00905762	0.0110229			6.7	0.00965857	0.00033	-1.3428e-05			6.7	-0.00744954	0.00462646	-3.0518e-05			6.7	2.1973e-05	4.1504e-05				6.7	0.00045166	0.00047729	0.00635986	0.00560303			6.7	0.187	0.155198	0.246471			6.7	0.0032727	0.0054883	0.0021228
			6.8	8.0566e-05	8.0566e-05	6.7139e-05			6.8	0.0113892	0.00915527	0.0109741			6.8	0.000402124	0.00033	-1.4648e-05			6.8	-0.00744954	0.00462646	-3.1738e-05			6.8	1.9531e-05	4.2725e-05				6.8	0.00045288	0.00047729	0.00639648	0.00561523			6.8	0.179824	0.16904	0.246471			6.8	0.003291	0.0055054	0.0021887
			6.9	8.0566e-05	8.0566e-05	6.7139e-05			6.9	0.0113525	0.00914307	0.0109863			6.9	0.00965857	0.000328	-1.4648e-05			6.9	-0.00744954	0.00462646	-3.0518e-05			6.9	2.0752e-05	4.3945e-05				6.9	0.0004541	0.00047974	0.00644531	0.00561523			6.9	0.165471	0.175932	0.246471			6.9	0.0033081	0.0055139	0.0022839
			7	8.1787e-05	8.1787e-05	6.7139e-05			7	0.0113403	0.00911865	0.0109619			7	0.00965857	0.00033	-1.4648e-05			7	1.22324e-05	0.00461426	-3.0518e-05			7	2.0752e-05	4.5166e-05				7	0.0004541	0.00048218	0.00650635	0.00561523			7	0.151118	0.175932	0.246471			7	0.0033228	0.0055212	0.0023792
			7.1	8.0566e-05	8.3008e-05	6.7139e-05			7.1	0.0113647	0.00915527	0.0108887			7.1	0.000402124	0.00033	-1.3428e-05			7.1	-0.0149174	0.00460205	-3.0518e-05			7.1	2.0752e-05	4.7607e-05				7.1	0.00045532	0.0004834	0.00655518	0.00570068			7.1	0.136765	0.19661	0.246471			7.1	0.0033459	0.0055078	0.00245
			7.2	8.3008e-05	8.1787e-05	6.5918e-05			7.2	0.0113892	0.00910645	0.0109131			7.2	0.000402124	0.000331	-1.3428e-05			7.2	-0.00744954	0.00457764	-3.0518e-05			7.2	1.9531e-05	4.6387e-05				7.2	0.00045776	0.0004834	0.00664063	0.0057373			7.2	0.158294	0.189718	0.246471			7.2	0.0033875	0.0055505	0.002478
			7.3	8.3008e-05	8.4229e-05	6.4697e-05			7.3	0.011377	0.00904541	0.0109619			7.3	-0.00886191	0.00033	-1.3428e-05			7.3	-0.00744954	0.00460205	-3.0518e-05			7.3	2.0752e-05	4.7607e-05				7.3	0.00045776	0.00048462	0.00672607	0.00577393			7.3	0.143941	0.19661	0.253647			7.3	0.0034204	0.0055713	0.0025073
			7.4	8.3008e-05	8.1787e-05	6.4697e-05			7.4	0.0113403	0.00914307	0.0110107			7.4	0.000402124	0.00033	-1.4648e-05			7.4	-0.00744954	0.00460205	-3.0518e-05			7.4	2.0752e-05	4.8828e-05				7.4	0.00045776	0.00048584	0.00683594	0.0057373			7.4	0.151118	0.203503	0.268059			7.4	0.0034912	0.0055554	0.0025439
			7.5	8.3008e-05	8.3008e-05	6.5918e-05			7.5	0.0113892	0.00910645	0.0109741			7.5	0.000402124	0.000328	-1.3428e-05			7.5	-0.00744954	0.00456543	-2.9297e-05			7.5	2.1973e-05	5.0049e-05				7.5	0.00045776	0.00048706	0.00697021	0.00571289			7.5	0.143941	0.203503	0.253647			7.5	0.003573	0.005553	0.0025708
			7.6	8.4229e-05	8.4229e-05	6.5918e-05			7.6	0.0113892	0.00911865	0.0109619			7.6	-0.00886191	0.000332	-1.2207e-05			7.6	-0.0149174	0.00462646	-2.9297e-05			7.6	2.1973e-05	4.8828e-05				7.6	0.00046021	0.00048828	0.00717773	0.00566406			7.6	0.151118	0.224181	0.260882			7.6	0.0036438	0.0055493	0.0026013
			7.7	8.5449e-05	8.4229e-05	6.5918e-05			7.7	0.0114258	0.00910645	0.0109253			7.7	0.000402124	0.000331	-1.4648e-05			7.7	-0.00744954	0.00454102	-2.9297e-05			7.7	2.1973e-05	4.8828e-05				7.7	0.00046021	0.0004895	0.00722656	0.00567627			7.7	0.151118	0.210395	0.268059			7.7	0.0037256	0.0055444	0.0026294
			7.8	8.5449e-05	8.4229e-05	6.3477e-05			7.8	0.011438	0.00917969	0.0110718			7.8	0.000402124	0.000331	-1.3428e-05			7.8	-0.00744954	0.00455322	-2.8076e-05			7.8	2.0752e-05	4.7607e-05				7.8	0.00046021	0.0004895	0.00732422	0.00567627			7.8	0.143941	0.217288	0.260882			7.8	0.0038074	0.005575	0.002627
			7.9	8.5449e-05	8.5449e-05	6.4697e-05			7.9	0.0114746	0.00915527	0.0109741			7.9	0.00965857	0.00033	-1.4648e-05			7.9	-0.00744954	0.00466309	-2.8076e-05			7.9	2.0752e-05	4.6387e-05				7.9	0.00046021	0.00049194	0.00739746	0.00567627			7.9	0.151118	0.217288	0.253647			7.9	0.0038757	0.005592	0.0026648
			8	8.5449e-05	8.667e-05	6.5918e-05			8	0.0114624	0.00922852	0.0109497			8	0.00965857	0.00033	-1.3428e-05			8	-0.00744954	0.0046875	-2.9297e-05			8	2.0752e-05	4.6387e-05				8	0.00046265	0.00049072	0.00751953	0.00566406			8	0.172647	0.224181	0.260882			8	0.0039893	0.0055957	0.0026978
			8.1	8.667e-05	8.7891e-05	6.4697e-05			8.1	0.011377	0.00921631	0.0109619			8.1	0.00965857	0.000331	-1.3428e-05			8.1	-0.00744954	0.00465088	-2.9297e-05			8.1	2.1973e-05	4.7607e-05				8.1	0.00046143	0.00049194	0.00760498	0.00566406			8.1	0.172647	0.210395	0.268059			8.1	0.0040576	0.0056116	0.0027087
			8.2	8.7891e-05	8.9111e-05	6.5918e-05			8.2	0.011377	0.0092041	0.0110107			8.2	0.00965857	0.00033	-1.3428e-05			8.2	-0.00744954	0.00462646	-2.8076e-05			8.2	2.1973e-05	4.8828e-05				8.2	0.00046387	0.00049194	0.00771484	0.00562744			8.2	0.194176	0.210395	0.260882			8.2	0.0041174	0.0056396	0.0027295
			8.3	8.667e-05	8.7891e-05	6.8359e-05			8.3	0.0114502	0.00919189	0.0110352			8.3	0.00965857	0.000331	-1.2207e-05			8.3	-0.00744954	0.00461426	-2.6855e-05			8.3	2.0752e-05	4.8828e-05				8.3	0.00046387	0.00049316	0.00776367	0.00563965			8.3	0.208529	0.210395	0.268059			8.3	0.0041687	0.0056262	0.0027393
			8.4	8.9111e-05	8.7891e-05	6.7139e-05			8.4	0.0115356	0.00917969	0.0111938			8.4	0.00965857	0.000331	-1.3428e-05			8.4	1.22324e-05	0.00460205	-2.6855e-05			8.4	2.1973e-05	4.7607e-05				8.4	0.00046387	0.00049316	0.00783691	0.00566406			8.4	0.201353	0.210395	0.260882			8.4	0.0042126	0.0056213	0.0027417
			8.5	8.9111e-05	8.9111e-05	6.8359e-05			8.5	0.0115967	0.00913086	0.0111572			8.5	0.00965857	0.00033	-1.2207e-05			8.5	1.22324e-05	0.00467529	-2.6855e-05			8.5	1.9531e-05	4.6387e-05				8.5	0.00046509	0.00049438	0.00800781	0.00568848			8.5	0.215706	0.224181	0.268059			8.5	0.0042468	0.0056714	0.0027307
			8.6	9.0332e-05	8.9111e-05	6.8359e-05			8.6	0.0116455	0.00915527	0.0111938			8.6	0.00965857	0.000331	-1.3428e-05			8.6	1.22324e-05	0.00463867	-2.6855e-05			8.6	2.0752e-05	4.7607e-05				8.6	0.00046509	0.00049316	0.00799561	0.00566406			8.6	0.208529	0.217288	0.268059			8.6	0.0042896	0.0056653	0.0027515
			8.7	8.9111e-05	9.0332e-05	6.7139e-05			8.7	0.0115967	0.00915527	0.0112183			8.7	0.0189226	0.000328	-1.3428e-05			8.7	-0.00744954	0.00465088	-2.8076e-05			8.7	2.0752e-05	4.7607e-05				8.7	0.00046509	0.00049561	0.00800781	0.00567627			8.7	0.201353	0.210395	0.253647			8.7	0.0043298	0.0056641	0.0027612
			8.8	9.0332e-05	8.7891e-05	6.8359e-05			8.8	0.0116089	0.00914307	0.0113037			8.8	0.0189226	0.000331	-1.3428e-05			8.8	1.22324e-05	0.00467529	-2.8076e-05			8.8	1.9531e-05	4.7607e-05				8.8	0.00046509	0.00049561	0.00806885	0.00567627			8.8	0.194176	0.217288	0.260882			8.8	0.0043481	0.0056775	0.0027783
			8.9	9.1553e-05	9.0332e-05	6.8359e-05			8.9	0.0117554	0.00914307	0.0112793			8.9	0.0189226	0.000332	-1.3428e-05			8.9	-0.00744954	0.00466309	-2.8076e-05			8.9	2.0752e-05	4.7607e-05				8.9	0.00046631	0.00049561	0.00812988	0.00567627			8.9	0.201353	0.217288	0.268059			8.9	0.0043774	0.0056763	0.0027979
			9	9.2773e-05	9.1553e-05	6.8359e-05			9	0.0119019	0.00914307	0.0113525			9	0.00965857	0.000331	-1.3428e-05			9	-0.00744954	0.00460205	-2.8076e-05			9	2.0752e-05	4.6387e-05				9	0.00046753	0.00049561	0.00820313	0.00570068			9	0.187	0.203503	0.253647			9	0.0043933	0.0056519	0.002832
			9.1	9.1553e-05	9.0332e-05	6.8359e-05			9.1	0.012085	0.00913086	0.0114136			9.1	0.00965857	0.000331	-1.3428e-05			9.1	-0.00744954	0.0046875	-2.6855e-05			9.1	2.0752e-05	4.7607e-05				9.1	0.00046631	0.00049561	0.00823975	0.00568848			9.1	0.194176	0.217288	0.260882			9.1	0.0044019	0.0056763	0.0028235
			9.2	9.2773e-05	8.9111e-05	6.958e-05			9.2	0.0121338	0.00913086	0.0115234			9.2	0.0189226	0.000331	-1.3428e-05			9.2	-0.00744954	0.00467529	-2.5635e-05			9.2	2.0752e-05	5.0049e-05				9.2	0.00046631	0.00049805	0.00826416	0.00570068			9.2	0.201353	0.217288	0.268059			9.2	0.0044128	0.0057031	0.0028198
			9.3	9.2773e-05	9.2773e-05	6.8359e-05			9.3	0.0122192	0.00915527	0.0115845			9.3	0.0281866	0.000331	-1.2207e-05			9.3	1.22324e-05	0.00463867	-2.6855e-05			9.3	2.0752e-05	4.8828e-05				9.3	0.00046753	0.00049927	0.00838623	0.00568848			9.3	0.194176	0.217288	0.260882			9.3	0.0044604	0.0057263	0.0028418
			9.4	9.2773e-05	9.1553e-05	7.2021e-05			9.4	0.0123169	0.00915527	0.0116333			9.4	0.0281866	0.000331	-1.2207e-05			9.4	-0.00744954	0.00465088	-2.8076e-05			9.4	2.0752e-05	4.7607e-05				9.4	0.00046875	0.00049683	0.00847168	0.0057251			9.4	0.194176	0.210395	0.246471			9.4	0.0044812	0.0057422	0.0028259
			9.5	9.3994e-05	9.1553e-05	7.0801e-05			9.5	0.0122803	0.00917969	0.0116943			9.5	0.0189226	0.000331	-1.3428e-05			9.5	1.22324e-05	0.00466309	-2.6855e-05			9.5	2.0752e-05	5.0049e-05				9.5	0.00046875	0.00049805	0.00861816	0.00568848			9.5	0.201353	0.217288	0.246471			9.5	0.004491	0.0057153	0.0028455
			9.6	9.6436e-05	9.1553e-05	7.0801e-05			9.6	0.0124634	0.00917969	0.0118652			9.6	0.0189226	0.00033	-1.2207e-05			9.6	1.22324e-05	0.00463867	-2.8076e-05			9.6	2.1973e-05	5.0049e-05				9.6	0.00046997	0.00050049	0.00872803	0.00570068			9.6	0.201353	0.210395	0.253647			9.6	0.004519	0.005697	0.0028699
			9.7	9.3994e-05	9.1553e-05	7.2021e-05			9.7	0.012439	0.00915527	0.0119141			9.7	0.0189226	0.000331	-1.2207e-05			9.7	1.22324e-05	0.00466309	-2.5635e-05			9.7	2.0752e-05	5.0049e-05				9.7	0.00046875	0.00050049	0.00876465	0.0057373			9.7	0.201353	0.217288	0.239294			9.7	0.0045337	0.0056995	0.0028931
			9.8	9.5215e-05	9.1553e-05	7.3242e-05			9.8	0.0124878	0.00917969	0.0119751			9.8	0.0189226	0.000331	-1.0986e-05			9.8	-0.00744954	0.0046875	-2.6855e-05			9.8	2.0752e-05	4.8828e-05				9.8	0.00046997	0.00049927	0.00875244	0.00577393			9.8	0.208529	0.217288	0.246471			9.8	0.0045447	0.0057166	0.0029199
			9.9	9.6436e-05	9.3994e-05	7.3242e-05			9.9	0.0125366	0.0092041	0.0118774			9.9	0.0189226	0.00033	-1.2207e-05			9.9	1.22324e-05	0.00461426	-2.5635e-05			9.9	2.1973e-05	5.0049e-05				9.9	0.00047119	0.00049927	0.00887451	0.00587158			9.9	0.194176	0.210395	0.246471			9.9	0.0045813	0.0057214	0.0029297
			10	9.5215e-05	9.5215e-05	7.3242e-05			10	0.0125854	0.0092041	0.0118408			10	0.0281866	0.00033	-1.3428e-05			10	1.22324e-05	0.00466309	-2.4414e-05			10	2.0752e-05	5.0049e-05				10	0.00046997	0.00050049	0.00892334	0.00598145			10	0.194176	0.203503	0.253647			10	0.0046033	0.005708	0.0029333
			10.1	9.5215e-05	9.5215e-05	7.5684e-05			10.1	0.0125488	0.00917969	0.011792			10.1	0.0281866	0.000333	-1.2207e-05			10.1	1.22324e-05	0.00467529	-2.4414e-05			10.1	1.8311e-05	5.127e-05				10.1	0.00047119	0.00050171	0.00897217	0.00600586			10.1	0.194176	0.210395	0.260882			10.1	0.0046143	0.0057349	0.002937
			10.2	9.5215e-05	9.5215e-05	7.5684e-05			10.2	0.012561	0.00917969	0.0118042			10.2	0.0189226	0.000334	-1.2207e-05			10.2	1.22324e-05	0.00465088	-2.6855e-05			10.2	2.0752e-05	5.127e-05				10.2	0.00047363	0.00050415	0.00900879	0.00598145			10.2	0.194176	0.19661	0.253647			10.2	0.0046069	0.0057385	0.0029663
			10.3	9.6436e-05	9.6436e-05	7.6904e-05			10.3	0.012439	0.00914307	0.0118896			10.3	0.0189226	0.000336	-1.2207e-05			10.3	1.22324e-05	0.00467529	-2.4414e-05			10.3	2.0752e-05	5.127e-05				10.3	0.00047363	0.00050049	0.009021	0.00598145			10.3	0.194176	0.203503	0.253647			10.3	0.0046021	0.0057422	0.0029761
			10.4	9.7656e-05	9.6436e-05	7.9346e-05			10.4	0.0123413	0.00908203	0.0119385			10.4	0.0189226	0.000334	-1.2207e-05			10.4	1.22324e-05	0.00469971	-2.4414e-05			10.4	2.1973e-05	5.127e-05				10.4	0.00047363	0.00050049	0.00908203	0.00599365			10.4	0.201353	0.19661	0.246471			10.4	0.004585	0.0057739	0.0029675
			10.5	9.7656e-05	9.6436e-05	7.8125e-05			10.5	0.0122437	0.00916748	0.0118164			10.5	0.0281866	0.000334	-1.2207e-05			10.5	0.00748012	0.00467529	-2.4414e-05			10.5	2.0752e-05	5.127e-05				10.5	0.00047363	0.00050049	0.00913086	0.00603027			10.5	0.194176	0.19661	0.253647			10.5	0.0046118	0.0057544	0.002998
			10.6	9.8877e-05	9.6436e-05	7.8125e-05			10.6	0.0121826	0.00914307	0.0117188			10.6	0.0374507	0.000336	-1.2207e-05			10.6	0.00748012	0.00467529	-2.4414e-05			10.6	2.0752e-05	5.127e-05				10.6	0.00047241	0.00050171	0.00909424	0.00616455			10.6	0.194176	0.19661	0.239294			10.6	0.0046252	0.0057507	0.0029956
			10.7	9.8877e-05	9.7656e-05	7.9346e-05			10.7	0.0121094	0.00914307	0.0118652			10.7	0.0281866	0.000337	-1.0986e-05			10.7	0.00748012	0.00469971	-2.4414e-05			10.7	2.1973e-05	5.127e-05				10.7	0.00047241	0.00050293	0.00915527	0.00626221			10.7	0.194176	0.19661	0.253647			10.7	0.0046313	0.0057837	0.0029797
			10.8	0.00010132	9.7656e-05	7.9346e-05			10.8	0.0122192	0.00914307	0.0119019			10.8	0.0281866	0.000336	-1.3428e-05			10.8	0.014948	0.0046875	-2.5635e-05			10.8	2.1973e-05	5.127e-05				10.8	0.00047363	0.00050293	0.00910645	0.00639648			10.8	0.179824	0.203503	0.253647			10.8	0.0046423	0.0058093	0.0029968
			10.9	0.0001001	9.7656e-05	7.8125e-05			10.9	0.012146	0.00914307	0.012085			10.9	0.0189226	0.000337	-1.2207e-05			10.9	0.014948	0.00467529	-2.4414e-05			10.9	2.0752e-05	5.127e-05				10.9	0.00047363	0.00050293	0.00906982	0.00650635			10.9	0.187	0.210395	0.260882			10.9	0.0046533	0.0057825	0.0030054
			11	0.0001001	9.7656e-05	7.9346e-05			11	0.0121582	0.00911865	0.0121216			11	0.0281866	0.000337	-1.0986e-05			11	0.00748012	0.0046875	-2.4414e-05			11	2.0752e-05	5.249e-05				11	0.00047485	0.00050293	0.00906982	0.0065918			11	0.179824	0.210395	0.260882			11	0.0046558	0.0057458	0.002998
			11.1	0.00010254	9.6436e-05	8.0566e-05			11.1	0.012146	0.00917969	0.0121704			11.1	0.0281866	0.000336	-1.0986e-05			11.1	0.00748012	0.00467529	-2.4414e-05			11.1	2.1973e-05	5.127e-05				11.1	0.00047485	0.00050171	0.00910645	0.00668945			11.1	0.179824	0.224181	0.260882			11.1	0.0046606	0.0057324	0.0030176
			11.2	0.00010254	9.8877e-05	7.9346e-05			11.2	0.0121826	0.00913086	0.0120972			11.2	0.0281866	0.000337	-1.2207e-05			11.2	0.014948	0.00467529	-2.4414e-05			11.2	2.1973e-05	5.249e-05				11.2	0.00047363	0.00050293	0.00916748	0.00673828			11.2	0.187	0.224181	0.253647			11.2	0.0046777	0.0057727	0.0030188
			11.3	0.00010132	9.8877e-05	8.0566e-05			11.3	0.0121826	0.00911865	0.0120483			11.3	0.0281866	0.000337	-1.0986e-05			11.3	0.0224159	0.00467529	-2.1973e-05			11.3	2.1973e-05	5.249e-05				11.3	0.00047363	0.00050415	0.0092041	0.00679932			11.3	0.187	0.224181	0.253647			11.3	0.0047034	0.0057788	0.0030359
			11.4	0.00010132	0.0001001	8.0566e-05			11.4	0.0122559	0.00909424	0.0119385			11.4	0.0281866	0.000334	-1.0986e-05			11.4	0.0224159	0.00471191	-2.1973e-05			11.4	2.1973e-05	5.3711e-05				11.4	0.00047363	0.00050415	0.00921631	0.00689697			11.4	0.179824	0.224181	0.246471			11.4	0.0046997	0.0057922	0.0030347
			11.5	0.00010254	0.0001001	8.1787e-05			11.5	0.0122314	0.00909424	0.0119629			11.5	0.0281866	0.000336	-1.0986e-05			11.5	0.0224159	0.00466309	-2.1973e-05			11.5	2.0752e-05	5.249e-05				11.5	0.00047485	0.00050415	0.0092041	0.00698242			11.5	0.187	0.217288	0.246471			11.5	0.0047253	0.0057703	0.0030444
			11.6	0.00010254	0.00010132	8.1787e-05			11.6	0.0122437	0.00909424	0.0118774			11.6	0.0374507	0.000336	-1.0986e-05			11.6	0.0224159	0.00469971	-2.1973e-05			11.6	2.0752e-05	5.249e-05				11.6	0.00047485	0.00050415	0.00919189	0.00705566			11.6	0.187	0.217288	0.260882			11.6	0.0047339	0.0057629	0.0030444
			11.7	0.00010254	0.00010254	8.3008e-05			11.7	0.0122681	0.00914307	0.0118896			11.7	0.0189226	0.000334	-1.0986e-05			11.7	0.014948	0.00472412	-2.1973e-05			11.7	2.3193e-05	5.249e-05				11.7	0.00047607	0.00050415	0.00914307	0.00710449			11.7	0.179824	0.217288	0.253647			11.7	0.0047168	0.0057324	0.0030408
			11.8	0.00010376	0.00010254	8.1787e-05			11.8	0.012207	0.00919189	0.0119019			11.8	0.0281866	0.000334	-1.0986e-05			11.8	0.014948	0.0046875	-2.1973e-05			11.8	2.0752e-05	5.3711e-05				11.8	0.00047607	0.00050415	0.00919189	0.00712891			11.8	0.179824	0.231073	0.253647			11.8	0.0047583	0.005752	0.0030603
			11.9	0.00010254	0.00010254	8.3008e-05			11.9	0.012207	0.00919189	0.0118774			11.9	0.0281866	0.000336	-9.7656e-06			11.9	0.014948	0.00471191	-2.0752e-05			11.9	2.3193e-05	5.3711e-05				11.9	0.00047607	0.00050293	0.0092041	0.00718994			11.9	0.187	0.224181	0.246471			11.9	0.0047522	0.0057373	0.0030713
			12	0.00010498	0.00010254	8.3008e-05			12	0.0122681	0.00927734	0.0118286			12	0.0281866	0.000337	-9.7656e-06			12	0.014948	0.00467529	-2.1973e-05			12	2.1973e-05	5.249e-05				12	0.00047607	0.00050415	0.00917969	0.00727539			12	0.187	0.224181	0.253647			12	0.0047693	0.0057642	0.0030872
			12.1	0.00010498	0.00010498	8.5449e-05			12.1	0.0122925	0.009375	0.011853			12.1	0.0189226	0.000334	-9.7656e-06			12.1	0.0224159	0.00466309	-2.0752e-05			12.1	2.1973e-05	5.3711e-05				12.1	0.00047607	0.00050293	0.00922852	0.00734863			12.1	0.187	0.231073	0.239294			12.1	0.0047778	0.0057666	0.0030811
			12.2	0.00010498	0.00010376	8.3008e-05			12.2	0.0122925	0.00938721	0.0118164			12.2	0.0189226	0.000336	-9.7656e-06			12.2	0.0298777	0.00466309	-2.0752e-05			12.2	2.0752e-05	5.249e-05				12.2	0.00047729	0.00050537	0.00926514	0.00740967			12.2	0.187	0.217288	0.260882			12.2	0.0047925	0.0057434	0.0030823
			12.3	0.00010376	0.00010376	8.4229e-05			12.3	0.0122681	0.00944824	0.0118286			12.3	0.0189226	0.000334	-1.2207e-05			12.3	0.0224159	0.00467529	-2.0752e-05			12.3	2.0752e-05	5.3711e-05				12.3	0.00047729	0.00050415	0.00925293	0.0074707			12.3	0.187	0.224181	0.246471			12.3	0.0047974	0.0057568	0.0030505
			12.4	0.00010498	0.00010498	8.5449e-05			12.4	0.0122681	0.0095459	0.0119019			12.4	0.0281866	0.000336	-1.0986e-05			12.4	0.014948	0.00467529	-2.0752e-05			12.4	2.0752e-05	5.249e-05				12.4	0.00047729	0.00050293	0.00931396	0.00753174			12.4	0.194176	0.231073	0.246471			12.4	0.0047937	0.0057788	0.003042
			12.5	0.00010498	0.00010498	8.5449e-05			12.5	0.0122314	0.00958252	0.0119385			12.5	0.0281866	0.000337	-1.0986e-05			12.5	0.0224159	0.00466309	-1.9531e-05			12.5	2.0752e-05	5.3711e-05				12.5	0.00047607	0.00050171	0.00936279	0.00760498			12.5	0.194176	0.224181	0.246471			12.5	0.0048169	0.0057971	0.0030457
			12.6	0.0001062	0.0001062	8.7891e-05			12.6	0.0122192	0.00966797	0.0118896			12.6	0.0281866	0.000334	-1.0986e-05			12.6	0.014948	0.00479736	-2.0752e-05			12.6	2.3193e-05	5.4932e-05				12.6	0.00047729	0.00050293	0.009375	0.00765381			12.6	0.187	0.217288	0.246471			12.6	0.0048279	0.0058191	0.0030542
			12.7	0.00010498	0.00010742	8.7891e-05			12.7	0.012207	0.00965576	0.0119873			12.7	0.0374507	0.000336	-1.0986e-05			12.7	0.0298777	0.00467529	-2.0752e-05			12.7	2.1973e-05	5.4932e-05				12.7	0.00047607	0.00050415	0.00931396	0.00772705			12.7	0.187	0.231073	0.246471			12.7	0.004823	0.0058459	0.0030688
			12.8	0.0001062	0.0001062	9.0332e-05			12.8	0.012146	0.00970459	0.0120483			12.8	0.0374507	0.000336	-1.0986e-05			12.8	0.0224159	0.00467529	-2.1973e-05			12.8	2.0752e-05	5.4932e-05				12.8	0.00047607	0.00050415	0.00932617	0.00775146			12.8	0.201353	0.224181	0.260882			12.8	0.0048267	0.0058411	0.003064
			12.9	0.0001062	0.0001062	9.0332e-05			12.9	0.012146	0.00975342	0.0120483			12.9	0.0281866	0.000337	-1.0986e-05			12.9	0.0298777	0.00469971	-2.0752e-05			12.9	2.1973e-05	5.4932e-05				12.9	0.00047607	0.00050415	0.00927734	0.00780029			12.9	0.201353	0.224181	0.246471			12.9	0.004834	0.0058545	0.0030591
			13	0.0001062	0.0001062	9.1553e-05			13	0.012146	0.00979004	0.0119629			13	0.0374507	0.000334	-1.0986e-05			13	0.0373456	0.00469971	-1.9531e-05			13	2.0752e-05	5.7373e-05				13	0.00047729	0.00050415	0.00933838	0.00787354			13	0.187	0.231073	0.253647			13	0.0048328	0.0058728	0.003064
			13.1	0.0001062	0.00010742	9.0332e-05			13.1	0.0121582	0.00994873	0.011853			13.1	0.0652504	0.000334	-9.7656e-06			13.1	0.0373456	0.00465088	-1.9531e-05			13.1	2.0752e-05	5.7373e-05				13.1	0.00047485	0.00050415	0.00926514	0.00788574			13.1	0.187	0.224181	0.253647			13.1	0.0048547	0.0058765	0.0030713
			13.2	0.0001062	0.0001062	8.9111e-05			13.2	0.0121338	0.0101074	0.0117676			13.2	0.0559712	0.000336	-1.0986e-05			13.2	0.0224159	0.00465088	-1.8311e-05			13.2	2.1973e-05	5.4932e-05				13.2	0.00047607	0.00050537	0.00925293	0.00792236			13.2	0.194176	0.224181	0.253647			13.2	0.0048535	0.0058728	0.0030835
			13.3	0.00010742	0.00010742	9.0332e-05			13.3	0.0122192	0.0103027	0.0117188			13.3	0.0374507	0.000336	-9.7656e-06			13.3	0.0373456	0.00466309	-1.9531e-05			13.3	2.1973e-05	5.249e-05				13.3	0.00047729	0.00050293	0.00924072	0.0079834			13.3	0.194176	0.231073	0.239294			13.3	0.0048438	0.0058984	0.0030847
			13.4	0.00010742	0.00010742	9.0332e-05			13.4	0.0121582	0.0103394	0.0116699			13.4	0.0281866	0.000336	-1.0986e-05			13.4	0.0373456	0.00466309	-1.9531e-05			13.4	2.0752e-05	5.249e-05				13.4	0.00047729	0.00050415	0.00926514	0.00800781			13.4	0.187	0.231073	0.253647			13.4	0.0048389	0.0058862	0.0030762
			13.5	0.00010742	0.00011108	8.7891e-05			13.5	0.0121704	0.0101318	0.0116333			13.5	0.0189226	0.000336	-9.7656e-06			13.5	0.0373456	0.00467529	-1.8311e-05			13.5	2.0752e-05	5.249e-05				13.5	0.00047729	0.00050415	0.00927734	0.00803223			13.5	0.187	0.231073	0.246471			13.5	0.004834	0.0058655	0.0030701
			13.6	0.00010864	0.00010986	8.9111e-05			13.6	0.012207	0.0101318	0.0116821			13.6	0.000402124	0.000336	-9.7656e-06			13.6	0.0373456	0.00467529	-1.9531e-05			13.6	2.0752e-05	5.4932e-05				13.6	0.00047729	0.00050537	0.00927734	0.00806885			13.6	0.179824	0.224181	0.246471			13.6	0.0048242	0.0058801	0.0030688
			13.7	0.00010864	0.00010986	9.0332e-05			13.7	0.0122314	0.010144	0.0117188			13.7	0.00965857	0.000337	-9.7656e-06			13.7	0.0373456	0.00471191	-1.9531e-05			13.7	2.0752e-05	5.3711e-05				13.7	0.00047729	0.00050659	0.00932617	0.00810547			13.7	0.194176	0.237966	0.246471			13.7	0.0048511	0.0058679	0.0030933
			13.8	0.00010986	0.00010986	9.0332e-05			13.8	0.012207	0.0101563	0.0116943			13.8	0.0189226	0.000336	-9.7656e-06			13.8	0.0298777	0.00472412	-1.9531e-05			13.8	2.1973e-05	5.3711e-05				13.8	0.00047607	0.00050415	0.00932617	0.00810547			13.8	0.194176	0.237966	0.246471			13.8	0.0048572	0.0058618	0.0030933
			13.9	0.00010864	0.00011108	9.0332e-05			13.9	0.0122925	0.0101318	0.0117188			13.9	0.0189226	0.000337	-1.0986e-05			13.9	0.0373456	0.00474854	-1.9531e-05			13.9	2.1973e-05	5.249e-05				13.9	0.00047729	0.00050537	0.00941162	0.0081665			13.9	0.194176	0.217288	0.253647			13.9	0.0048682	0.0058752	0.0030933
			14	0.00010986	0.00011108	9.0332e-05			14	0.0122925	0.0100464	0.0117432			14	0.0281866	0.000336	-9.7656e-06			14	0.0373456	0.00476074	-1.9531e-05			14	2.0752e-05	5.4932e-05				14	0.00047729	0.00050659	0.00939941	0.00817871			14	0.194176	0.237966	0.246471			14	0.0048755	0.0058716	0.0031018
			14.1	0.00010986	0.00011108	9.1553e-05			14.1	0.0123291	0.00991211	0.0117432			14.1	0.0281866	0.000337	-9.7656e-06			14.1	0.0373456	0.00480957	-1.9531e-05			14.1	2.1973e-05	5.3711e-05				14.1	0.00047729	0.00050537	0.00933838	0.00821533			14.1	0.187	0.231073	0.253647			14.1	0.0048767	0.0058374	0.0030896
			14.2	0.00011108	0.00010986	9.2773e-05			14.2	0.0123535	0.00987549	0.0117188			14.2	0.0281866	0.000336	-9.7656e-06			14.2	0.0373456	0.00479736	-1.9531e-05			14.2	2.1973e-05	5.4932e-05				14.2	0.00047607	0.00050537	0.00928955	0.00821533			14.2	0.187	0.237966	0.246471			14.2	0.0048816	0.005863	0.0030725
			14.3	0.00011108	0.00011108	9.5215e-05			14.3	0.0123291	0.00982666	0.0116943			14.3	0.0281866	0.000336	-9.7656e-06			14.3	0.0522752	0.00484619	-1.9531e-05			14.3	2.1973e-05	5.4932e-05				14.3	0.00047729	0.00050659	0.00927734	0.00823975			14.3	0.187	0.231073	0.253647			14.3	0.0048889	0.0058582	0.0030823
			14.4	0.00011108	0.00011108	9.5215e-05			14.4	0.0122559	0.00974121	0.0116577			14.4	0.0374507	0.000334	-9.7656e-06			14.4	0.0522752	0.00484619	-1.9531e-05			14.4	2.0752e-05	5.3711e-05				14.4	0.00047974	0.00050537	0.00931396	0.00825195			14.4	0.194176	0.231073	0.253647			14.4	0.0049023	0.0058496	0.0030994
			14.5	0.00011108	0.00011108	9.6436e-05			14.5	0.0122803	0.00970459	0.0116821			14.5	0.0374507	0.000336	-1.0986e-05			14.5	0.0522752	0.00488281	-1.9531e-05			14.5	2.0752e-05	5.3711e-05				14.5	0.00047729	0.00050659	0.00927734	0.00823975			14.5	0.187	0.231073	0.246471			14.5	0.0048999	0.0058472	0.003103
			14.6	0.0001123	0.00011108	9.7656e-05			14.6	0.0122925	0.00970459	0.0117676			14.6	0.0374507	0.000337	-8.5449e-06			14.6	0.0522752	0.00491943	-1.8311e-05			14.6	2.0752e-05	5.4932e-05				14.6	0.00047729	0.00050659	0.00931396	0.00827637			14.6	0.194176	0.224181	0.260882			14.6	0.0049072	0.0058459	0.0031067
			14.7	0.00011108	0.00011108	9.6436e-05			14.7	0.0122803	0.00965576	0.0117798			14.7	0.0281866	0.000337	-1.0986e-05			14.7	0.0522752	0.00499268	-1.8311e-05			14.7	2.1973e-05	5.4932e-05				14.7	0.00047729	0.00050537	0.00935059	0.00828857			14.7	0.187	0.231073	0.260882			14.7	0.0048962	0.0058215	0.0031042
			14.8	0.0001123	0.0001123	9.6436e-05			14.8	0.0122803	0.00979004	0.0117188			14.8	0.0189226	0.000336	-9.7656e-06			14.8	0.0522752	0.0050293	-1.8311e-05			14.8	2.1973e-05	5.4932e-05				14.8	0.00047729	0.00050537	0.00931396	0.00831299			14.8	0.194176	0.231073	0.253647			14.8	0.0048962	0.0058325	0.0030896
			14.9	0.0001123	0.00011353	9.3994e-05			14.9	0.0123047	0.00976563	0.0116821			14.9	0.0281866	0.000337	-9.7656e-06			14.9	0.0597431	0.00501709	-1.8311e-05			14.9	2.1973e-05	5.6152e-05				14.9	0.00047852	0.00050537	0.00931396	0.00830078			14.9	0.194176	0.231073	0.253647			14.9	0.004884	0.0058472	0.0030823
			15	0.0001123	0.0001123	9.3994e-05			15	0.0122803	0.0097168	0.0117065			15	0.0374507	0.000337	-1.0986e-05			15	0.0522752	0.00495605	-1.9531e-05			15	2.1973e-05	5.4932e-05				15	0.00047607	0.00050781	0.00933838	0.00830078			15	0.201353	0.231073	0.260882			15	0.0049109	0.0058777	0.0030945
			15.1	0.0001123	0.0001123	9.6436e-05			15.1	0.0123291	0.00963135	0.0117188			15.1	0.0281866	0.000338	-8.5449e-06			15.1	0.0597431	0.00493164	-1.8311e-05			15.1	2.1973e-05	5.4932e-05				15.1	0.00047729	0.00050537	0.00935059	0.0083252			15.1	0.194176	0.224181	0.253647			15.1	0.004906	0.0058679	0.0031165
			15.2	0.0001123	0.00011353	9.5215e-05			15.2	0.0123413	0.00961914	0.0118164			15.2	0.0281866	0.000337	-9.7656e-06			15.2	0.0597431	0.00490723	-1.8311e-05			15.2	2.1973e-05	5.4932e-05				15.2	0.00047729	0.00050537	0.009375	0.00834961			15.2	0.194176	0.231073	0.253647			15.2	0.0049048	0.0058557	0.0031128
			15.3	0.00011353	0.00011353	9.6436e-05			15.3	0.0123047	0.00960693	0.0117432			15.3	0.0374507	0.000337	-1.0986e-05			15.3	0.0597431	0.00493164	-1.8311e-05			15.3	2.1973e-05	5.4932e-05				15.3	0.00047852	0.00050537	0.00938721	0.0083252			15.3	0.194176	0.237966	0.253647			15.3	0.0049023	0.0058325	0.0031152
			15.4	0.0001123	0.00011353	9.6436e-05			15.4	0.0123169	0.00961914	0.0117432			15.4	0.0374507	0.000338	-9.7656e-06			15.4	0.0597431	0.00488281	-1.8311e-05			15.4	1.9531e-05	5.4932e-05				15.4	0.00047729	0.00050415	0.009375	0.0083374			15.4	0.187	0.231073	0.253647			15.4	0.0049048	0.0058313	0.0031018
			15.5	0.0001123	0.0001123	9.6436e-05			15.5	0.0123291	0.00960693	0.0116577			15.5	0.0281866	0.000337	-9.7656e-06			15.5	0.067211	0.00488281	-1.9531e-05			15.5	2.1973e-05	5.3711e-05				15.5	0.00047852	0.00050537	0.00943604	0.0083374			15.5	0.194176	0.237966	0.260882			15.5	0.0048865	0.0058411	0.0030994
			15.6	0.0001123	0.00011353	9.6436e-05			15.6	0.0123047	0.00964355	0.0116821			15.6	0.0281866	0.000336	-9.7656e-06			15.6	0.0597431	0.00489502	-1.8311e-05			15.6	2.3193e-05	5.4932e-05				15.6	0.00047852	0.00050537	0.00948486	0.00837402			15.6	0.179824	0.231073	0.253647			15.6	0.0048975	0.0058508	0.0031165
			15.7	0.0001123	0.00011475	9.6436e-05			15.7	0.0123901	0.00961914	0.0117065			15.7	0.0281866	0.000336	-1.0986e-05			15.7	0.0597431	0.00488281	-1.9531e-05			15.7	2.1973e-05	5.6152e-05				15.7	0.00047852	0.00050537	0.00947266	0.0083374			15.7	0.179824	0.224181	0.246471			15.7	0.0049036	0.0058557	0.0031152
			15.8	0.00011353	0.00011353	9.7656e-05			15.8	0.0124023	0.00963135	0.0117065			15.8	0.0281866	0.000337	-1.0986e-05			15.8	0.0522752	0.00487061	-1.8311e-05			15.8	2.0752e-05	5.4932e-05				15.8	0.00047852	0.00050659	0.00947266	0.0083252			15.8	0.194176	0.244859	0.260882			15.8	0.0049084	0.0058594	0.0031128
			15.9	0.00011353	0.00011353	9.8877e-05			15.9	0.0124023	0.00959473	0.011731			15.9	0.0374507	0.000339	-9.7656e-06			15.9	0.0597431	0.00489502	-1.709e-05			15.9	2.1973e-05	5.3711e-05				15.9	0.00048096	0.00050659	0.00946045	0.0083374			15.9	0.194176	0.237966	0.253647			15.9	0.0049182	0.0058728	0.0031128
			16	0.00011353	0.0001123	9.7656e-05			16	0.0123901	0.00964355	0.0117554			16	0.0281866	0.000338	-9.7656e-06			16	0.067211	0.00490723	-1.8311e-05			16	2.0752e-05	5.4932e-05				16	0.00047852	0.00050415	0.00943604	0.0083252			16	0.201353	0.237966	0.253647			16	0.0049194	0.0058496	0.003114
			16.1	0.00011353	0.00011353	9.8877e-05			16.1	0.0123901	0.00963135	0.0117432			16.1	0.0281866	0.000337	-1.0986e-05			16.1	0.067211	0.00490723	-1.8311e-05			16.1	2.1973e-05	5.4932e-05				16.1	0.00047852	0.00050537	0.00943604	0.0083252			16.1	0.201353	0.237966	0.246471			16.1	0.0049268	0.0058582	0.003092
			16.2	0.00011475	0.00011475	0.0001001			16.2	0.0124268	0.00961914	0.0117798			16.2	0.0374507	0.000339	-9.7656e-06			16.2	0.0746728	0.00490723	-1.8311e-05			16.2	2.0752e-05	5.4932e-05				16.2	0.00047852	0.00050537	0.00933838	0.00830078			16.2	0.194176	0.237966	0.260882			16.2	0.0049231	0.0058508	0.0031079
			16.3	0.0001123	0.00011353	0.0001001			16.3	0.0124634	0.00958252	0.011792			16.3	0.0467071	0.000339	-1.0986e-05			16.3	0.067211	0.00490723	-1.9531e-05			16.3	2.1973e-05	5.4932e-05				16.3	0.00047852	0.00050659	0.00939941	0.00831299			16.3	0.208529	0.244859	0.253647			16.3	0.0049243	0.0058643	0.0031226
			16.4	0.00011353	0.00011353	0.00010132			16.4	0.0125	0.00957031	0.0117798			16.4	0.0467071	0.000338	-9.7656e-06			16.4	0.067211	0.00487061	-1.8311e-05			16.4	2.3193e-05	5.3711e-05				16.4	0.00047852	0.00050537	0.00943604	0.0083374			16.4	0.201353	0.237966	0.260882			16.4	0.0049304	0.0058557	0.0031213
			16.5	0.00011353	0.00011475	0.00010132			16.5	0.012439	0.00955811	0.0118042			16.5	0.0374507	0.000338	-9.7656e-06			16.5	0.0746728	0.00490723	-1.8311e-05			16.5	2.1973e-05	5.4932e-05				16.5	0.00047852	0.00050537	0.00944824	0.00836182			16.5	0.201353	0.231073	0.253647			16.5	0.0049243	0.0058569	0.0031274
			16.6	0.00011475	0.00011597	0.0001001			16.6	0.0124146	0.00959473	0.0117798			16.6	0.0467071	0.000339	-1.0986e-05			16.6	0.067211	0.00489502	-1.709e-05			16.6	2.1973e-05	5.4932e-05				16.6	0.00047729	0.00050537	0.00941162	0.00836182			16.6	0.187	0.237966	0.260882			16.6	0.0049316	0.0058459	0.0031287
			16.7	0.00011475	0.00011475	0.00010132			16.7	0.0123779	0.00959473	0.0118286			16.7	0.0374507	0.000338	-1.0986e-05			16.7	0.067211	0.00489502	-1.8311e-05			16.7	2.1973e-05	5.4932e-05				16.7	0.00047729	0.00050537	0.00942383	0.00837402			16.7	0.201353	0.231073	0.260882			16.7	0.0049402	0.005863	0.0031128
			16.8	0.00011475	0.00011597	0.00010132			16.8	0.0123901	0.00959473	0.0118408			16.8	0.0374507	0.000338	-9.7656e-06			16.8	0.067211	0.00488281	-1.8311e-05			16.8	2.0752e-05	5.4932e-05				16.8	0.00047974	0.00050537	0.00944824	0.00836182			16.8	0.201353	0.224181	0.253647			16.8	0.0049329	0.0058655	0.0031152
			16.9	0.00011475	0.00011475	0.00010376			16.9	0.0123657	0.00960693	0.0118408			16.9	0.0374507	0.000339	-1.0986e-05			16.9	0.067211	0.00489502	-1.8311e-05			16.9	2.0752e-05	5.4932e-05				16.9	0.00047852	0.00050537	0.00943604	0.00834961			16.9	0.187	0.231073	0.260882			16.9	0.0049561	0.0058618	0.0031262
			17	0.00011475	0.00011597	0.00010376			17	0.0125366	0.00960693	0.0118042			17	0.0374507	0.000339	-9.7656e-06			17	0.067211	0.00487061	-1.709e-05			17	2.1973e-05	5.4932e-05				17	0.00047852	0.00050659	0.00946045	0.00836182			17	0.187	0.237966	0.268059			17	0.0049683	0.0058435	0.0031323
			17.1	0.00011475	0.00011597	0.00010254			17.1	0.012561	0.00960693	0.0117798			17.1	0.0374507	0.000339	-9.7656e-06			17.1	0.067211	0.00489502	-1.8311e-05			17.1	2.1973e-05	5.4932e-05				17.1	0.00047729	0.00050659	0.00946045	0.0083252			17.1	0.201353	0.244859	0.268059			17.1	0.0049646	0.0058337	0.0031311
			17.2	0.00011353	0.00011719	0.00010376			17.2	0.012561	0.00964355	0.0118286			17.2	0.0467071	0.000339	-8.5449e-06			17.2	0.067211	0.00489502	-1.8311e-05			17.2	2.1973e-05	5.4932e-05				17.2	0.00047729	0.00050659	0.00941162	0.0083252			17.2	0.187	0.237966	0.268059			17.2	0.0049719	0.0058167	0.0031299
			17.3	0.00011475	0.00011475	0.0001062			17.3	0.0125854	0.0097168	0.0119629			17.3	0.0374507	0.000339	-9.7656e-06			17.3	0.067211	0.00490723	-1.8311e-05			17.3	2.1973e-05	5.7373e-05				17.3	0.00047974	0.00050537	0.00936279	0.00831299			17.3	0.201353	0.224181	0.260882			17.3	0.0049805	0.0058069	0.0031409
			17.4	0.00011475	0.00011719	0.0001062			17.4	0.0125977	0.00970459	0.0119385			17.4	0.0374507	0.000339	-9.7656e-06			17.4	0.067211	0.00491943	-1.8311e-05			17.4	2.1973e-05	5.6152e-05				17.4	0.00047974	0.00050659	0.00941162	0.00830078			17.4	0.194176	0.237966	0.253647			17.4	0.0049536	0.0058264	0.0031287
			17.5	0.00011475	0.00011719	0.0001062			17.5	0.012561	0.00970459	0.0119385			17.5	0.0374507	0.000339	-1.0986e-05			17.5	0.067211	0.00490723	-1.8311e-05			17.5	2.1973e-05	5.6152e-05				17.5	0.00047852	0.00050659	0.00941162	0.0083252			17.5	0.194176	0.237966	0.253647			17.5	0.0049707	0.0058154	0.0031482
			17.6	0.00011597	0.00011719	0.00010498			17.6	0.0126953	0.00970459	0.0118896			17.6	0.0374507	0.000341	-9.7656e-06			17.6	0.0746728	0.00490723	-1.709e-05			17.6	2.1973e-05	5.4932e-05				17.6	0.00047729	0.00050781	0.009375	0.00830078			17.6	0.208529	0.237966	0.260882			17.6	0.004978	0.0058215	0.0031445
			17.7	0.00011353	0.00011597	0.00010498			17.7	0.0127075	0.00975342	0.0119995			17.7	0.0374507	0.000338	-9.7656e-06			17.7	0.0746728	0.00491943	-1.709e-05			17.7	2.0752e-05	5.4932e-05				17.7	0.00047729	0.00050659	0.00942383	0.00831299			17.7	0.201353	0.237966	0.260882			17.7	0.0049805	0.0058105	0.0031458
			17.8	0.00011475	0.00011597	0.0001062			17.8	0.0127197	0.00975342	0.0119751			17.8	0.0374507	0.000341	-7.3242e-06			17.8	0.0746728	0.00493164	-1.8311e-05			17.8	2.1973e-05	5.6152e-05				17.8	0.00047852	0.00050415	0.00944824	0.0083252			17.8	0.201353	0.237966	0.260882			17.8	0.0049902	0.0058008	0.0031458
			17.9	0.00011597	0.00011719	0.0001062			17.9	0.0126587	0.00985107	0.0120239			17.9	0.0374507	0.000338	-8.5449e-06			17.9	0.0746728	0.00489502	-1.709e-05			17.9	2.1973e-05	5.6152e-05				17.9	0.00047852	0.00050659	0.00943604	0.00830078			17.9	0.201353	0.237966	0.260882			17.9	0.0049866	0.0057898	0.0031494
			18	0.00011597	0.00011719	0.00010498			18	0.0126465	0.00985107	0.0120117			18	0.0374507	0.000341	-8.5449e-06			18	0.067211	0.00493164	-1.8311e-05			18	2.1973e-05	5.4932e-05				18	0.00047852	0.00050781	0.00946045	0.00830078			18	0.201353	0.244859	0.260882			18	0.0049792	0.0058032	0.0031348
			18.1	0.00011597	0.00011719	0.00010498			18.1	0.0126099	0.00979004	0.0120117			18.1	0.0374507	0.000341	-8.5449e-06			18.1	0.0746728	0.00493164	-1.709e-05			18.1	2.0752e-05	5.3711e-05				18.1	0.00047852	0.00050781	0.00943604	0.00828857			18.1	0.208529	0.231073	0.246471			18.1	0.0049805	0.0058215	0.0031458
			18.2	0.00011597	0.00011597	0.0001062			18.2	0.0126831	0.00979004	0.0119141			18.2	0.0374507	0.000341	-8.5449e-06			18.2	0.0746728	0.00491943	-1.8311e-05			18.2	2.0752e-05	5.3711e-05				18.2	0.00047852	0.00050659	0.00944824	0.00827637			18.2	0.208529	0.237966	0.268059			18.2	0.0049988	0.0058142	0.0031519
			18.3	0.00011719	0.00011841	0.0001062			18.3	0.0126709	0.00982666	0.0120117			18.3	0.0374507	0.000339	-8.5449e-06			18.3	0.0746728	0.00498047	-1.709e-05			18.3	2.1973e-05	5.3711e-05				18.3	0.00047852	0.00050537	0.00944824	0.00828857			18.3	0.194176	0.244859	0.260882			18.3	0.0050061	0.0058215	0.0031543
			18.4	0.00011719	0.00011963	0.00010864			18.4	0.0126587	0.00979004	0.0120239			18.4	0.0374507	0.000339	-7.3242e-06			18.4	0.0746728	0.00496826	-1.709e-05			18.4	2.1973e-05	5.6152e-05				18.4	0.00047852	0.00050781	0.00942383	0.0083252			18.4	0.201353	0.244859	0.260882			18.4	0.005	0.005835	0.0031445
			18.5	0.00011719	0.00011963	0.00010742			18.5	0.0126709	0.00982666	0.0120605			18.5	0.0467071	0.000339	-7.3242e-06			18.5	0.067211	0.00496826	-1.5869e-05			18.5	2.1973e-05	5.4932e-05				18.5	0.00047852	0.00050659	0.00941162	0.00834961			18.5	0.194176	0.237966	0.260882			18.5	0.0049988	0.0058179	0.003147
			18.6	0.00011841	0.00011841	0.00010986			18.6	0.0126831	0.00979004	0.0120239			18.6	0.0467071	0.000339	-6.1035e-06			18.6	0.0746728	0.00496826	-1.709e-05			18.6	2.3193e-05	5.4932e-05				18.6	0.00047852	0.00050537	0.00938721	0.0083374			18.6	0.201353	0.237966	0.260882			18.6	0.0049939	0.0058447	0.0031421
			18.7	0.00011719	0.00011963	0.0001123			18.7	0.0126221	0.00979004	0.0120239			18.7	0.0374507	0.000339	-6.1035e-06			18.7	0.067211	0.00495605	-1.709e-05			18.7	2.1973e-05	5.6152e-05				18.7	0.00047852	0.00050537	0.00939941	0.00834961			18.7	0.194176	0.231073	0.260882			18.7	0.0049805	0.0058618	0.0031506
			18.8	0.00011841	0.00012085	0.0001123			18.8	0.0127319	0.00979004	0.0120239			18.8	0.0467071	0.000339	-7.3242e-06			18.8	0.0746728	0.00498047	-1.709e-05			18.8	2.1973e-05	5.4932e-05				18.8	0.00047729	0.00050659	0.00942383	0.00836182			18.8	0.201353	0.237966	0.260882			18.8	0.0050024	0.0058691	0.003158
			18.9	0.00011719	0.00012085	0.00011108			18.9	0.0127441	0.00982666	0.0120361			18.9	0.0467071	0.000341	-9.7656e-06			18.9	0.0821407	0.00494385	-1.709e-05			18.9	2.1973e-05	5.4932e-05				18.9	0.00047852	0.00050659	0.00944824	0.00836182			18.9	0.194176	0.231073	0.253647			18.9	0.0050012	0.0058789	0.0031567
			19	0.00011841	0.00012207	0.00010986			19	0.0127441	0.00975342	0.0120117			19	0.0467071	0.000339	-8.5449e-06			19	0.0746728	0.00494385	-1.709e-05			19	2.1973e-05	5.4932e-05				19	0.00047852	0.00050659	0.00941162	0.0083374			19	0.201353	0.244859	0.253647			19	0.004989	0.0058813	0.0031421
			19.1	0.00011841	0.00012085	0.00010986			19.1	0.0127563	0.00983887	0.0120361			19.1	0.0559712	0.000339	-7.3242e-06			19.1	0.0746728	0.00491943	-1.5869e-05			19.1	2.1973e-05	5.4932e-05				19.1	0.00047852	0.00050537	0.00939941	0.00834961			19.1	0.194176	0.244859	0.260882			19.1	0.0050024	0.0058411	0.0031421
			19.2	0.00011841	0.00011963	0.00010986			19.2	0.0127197	0.00977783	0.0120728			19.2	0.0467071	0.000339	-8.5449e-06			19.2	0.0746728	0.00491943	-1.709e-05			19.2	2.0752e-05	5.6152e-05				19.2	0.00047729	0.00050659	0.00942383	0.0083252			19.2	0.187	0.231073	0.260882			19.2	0.0050012	0.0058411	0.0031372
			19.3	0.00011963	0.00012207	0.00010864			19.3	0.0126709	0.00979004	0.012085			19.3	0.0467071	0.000341	-7.3242e-06			19.3	0.067211	0.00495605	-1.5869e-05			19.3	2.0752e-05	5.6152e-05				19.3	0.00047729	0.00050537	0.00941162	0.0083252			19.3	0.194176	0.237966	0.246471			19.3	0.0049805	0.0058374	0.0031287
			19.4	0.00011963	0.00011963	0.00010864			19.4	0.0127319	0.00981445	0.0120605			19.4	0.0467071	0.000339	-7.3242e-06			19.4	0.0746728	0.00494385	-1.709e-05			19.4	2.1973e-05	5.6152e-05				19.4	0.00047852	0.00050537	0.00942383	0.0083374			19.4	0.194176	0.231073	0.253647			19.4	0.0050012	0.0058252	0.0031567
			19.5	0.00011841	0.00012085	0.00010864			19.5	0.0127441	0.00979004	0.012085			19.5	0.0374507	0.000341	-8.5449e-06			19.5	0.0746728	0.00494385	-1.709e-05			19.5	2.1973e-05	5.4932e-05				19.5	0.00047852	0.00050537	0.00941162	0.0083374			19.5	0.201353	0.244859	0.253647			19.5	0.0049988	0.0058032	0.0031641
			19.6	0.00011963	0.00012085	0.00010986			19.6	0.0127197	0.00980225	0.0121094			19.6	0.0374507	0.000339	-8.5449e-06			19.6	0.0821407	0.00494385	-1.709e-05			19.6	2.1973e-05	5.6152e-05				19.6	0.00047729	0.00050659	0.00941162	0.0083374			19.6	0.194176	0.231073	0.253647			19.6	0.0050024	0.0057996	0.0031543
			19.7	0.00011841	0.00012085	0.00010864			19.7	0.0127563	0.00982666	0.012146			19.7	0.0374507	0.000341	-8.5449e-06			19.7	0.0746728	0.00494385	-1.709e-05			19.7	2.1973e-05	5.7373e-05				19.7	0.00047729	0.00050537	0.00942383	0.0083374			19.7	0.194176	0.244859	0.260882			19.7	0.0050012	0.0058154	0.0031604
			19.8	0.00011963	0.00012085	0.00010864			19.8	0.0127319	0.00987549	0.0121094			19.8	0.0374507	0.000341	-9.7656e-06			19.8	0.0746728	0.00494385	-1.5869e-05			19.8	2.0752e-05	5.7373e-05				19.8	0.00047729	0.00050537	0.00944824	0.00834961			19.8	0.201353	0.244859	0.268059			19.8	0.0049976	0.005824	0.0031531
			19.9	0.00011841	0.00011963	0.00010864			19.9	0.0127075	0.00983887	0.0121582			19.9	0.0374507	0.000341	-8.5449e-06			19.9	0.0746728	0.00495605	-1.709e-05			19.9	2.0752e-05	5.7373e-05				19.9	0.00047852	0.00050659	0.00944824	0.0083374			19.9	0.201353	0.237966	0.253647			19.9	0.0049854	0.0058362	0.003136
			20	0.00011963	0.00012085	0.00010986			20	0.0127686	0.0098877	0.0121582			20	0.0374507	0.000341	-9.7656e-06			20	0.0821407	0.00494385	-1.709e-05			20	2.1973e-05	5.6152e-05				20	0.00047729	0.00050659	0.00943604	0.0083374			20	0.201353	0.237966	0.253647			20	0.0049805	0.0058289	0.003158
			20.1	0.00011963	0.00012085	0.00011108			20.1	0.0128174	0.00987549	0.0122314			20.1	0.0374507	0.000341	-9.7656e-06			20.1	0.0746728	0.00495605	-1.5869e-05			20.1	2.3193e-05	5.7373e-05				20.1	0.00047607	0.00050537	0.00946045	0.0083374			20.1	0.194176	0.237966	0.260882			20.1	0.0049976	0.005835	0.0031726
			20.2	0.00011963	0.00012085	0.00011108			20.2	0.0127441	0.00987549	0.012207			20.2	0.0467071	0.000341	-9.7656e-06			20.2	0.0746728	0.00499268	-1.5869e-05			20.2	2.0752e-05	5.7373e-05				20.2	0.00047729	0.00050537	0.00947266	0.0083374			20.2	0.194176	0.231073	0.253647			20.2	0.0050012	0.0058337	0.003175
			20.3	0.00011963	0.00012207	0.00011108			20.3	0.0127075	0.0098999	0.0122314			20.3	0.0467071	0.000341	-7.3242e-06			20.3	0.0746728	0.00496826	-1.709e-05			20.3	2.1973e-05	5.6152e-05				20.3	0.00047729	0.00050781	0.00947266	0.00834961			20.3	0.201353	0.231073	0.253647			20.3	0.0049915	0.0058423	0.0031665
			20.4	0.00011841	0.00012207	0.00011108			20.4	0.0127441	0.00992432	0.0122437			20.4	0.0374507	0.000341	-8.5449e-06			20.4	0.0746728	0.00493164	-1.709e-05			20.4	2.1973e-05	5.6152e-05				20.4	0.00047729	0.00050781	0.00946045	0.0083252			20.4	0.194176	0.231073	0.253647			20.4	0.0049976	0.0058228	0.0031616
			20.5	0.00012085	0.00012207	0.0001123			20.5	0.0128296	0.00992432	0.0122559			20.5	0.0374507	0.000342	-9.7656e-06			20.5	0.0746728	0.00494385	-1.709e-05			20.5	2.1973e-05	5.6152e-05				20.5	0.00047974	0.00050537	0.00943604	0.0083252			20.5	0.208529	0.231073	0.253647			20.5	0.0050073	0.0058533	0.0031531
			20.6	0.00011963	0.00012451	0.0001123			20.6	0.012854	0.00993652	0.0122437			20.6	0.0467071	0.000341	-8.5449e-06			20.6	0.0821407	0.00495605	-1.709e-05			20.6	2.1973e-05	5.6152e-05				20.6	0.00047852	0.00050659	0.00939941	0.0083252			20.6	0.201353	0.231073	0.268059			20.6	0.0049963	0.0058521	0.0031604
			20.7	0.00012085	0.00012329	0.00011108			20.7	0.0129883	0.00996094	0.0122437			20.7	0.0374507	0.000341	-9.7656e-06			20.7	0.0821407	0.00494385	-1.709e-05			20.7	2.0752e-05	5.7373e-05				20.7	0.00047729	0.00050781	0.009375	0.00838623			20.7	0.208529	0.237966	0.253647			20.7	0.0050085	0.0058618	0.0031726
			20.8	0.00012085	0.00012207	0.00011353			20.8	0.0129883	0.00993652	0.0123169			20.8	0.0467071	0.000341	-7.3242e-06			20.8	0.0746728	0.00498047	-1.5869e-05			20.8	2.1973e-05	5.7373e-05				20.8	0.00047729	0.00050659	0.00939941	0.00836182			20.8	0.208529	0.237966	0.246471			20.8	0.0050122	0.0058508	0.003175
			20.9	0.00012085	0.00012207	0.00011108			20.9	0.0130005	0.00993652	0.0123047			20.9	0.0467071	0.000341	-8.5449e-06			20.9	0.0821407	0.00499268	-1.5869e-05			20.9	2.3193e-05	5.6152e-05				20.9	0.00047974	0.00050781	0.00938721	0.00837402			20.9	0.194176	0.237966	0.253647			20.9	0.0050134	0.0058435	0.0031738
			21	0.00012085	0.00012329	0.00011108			21	0.0130127	0.00999756	0.0122681			21	0.0467071	0.000341	-9.7656e-06			21	0.0746728	0.00499268	-1.5869e-05			21	2.1973e-05	5.7373e-05				21	0.00047729	0.00050537	0.00943604	0.00838623			21	0.201353	0.244859	0.253647			21	0.0050281	0.0058289	0.0031836
			21.1	0.00011963	0.00012207	0.00011108			21.1	0.0130249	0.00998535	0.0122681			21.1	0.0467071	0.000341	-8.5449e-06			21.1	0.0821407	0.00499268	-1.5869e-05			21.1	2.1973e-05	5.7373e-05				21.1	0.00047852	0.00050781	0.00942383	0.00834961			21.1	0.201353	0.244859	0.246471			21.1	0.0050415	0.0058508	0.0031873
			21.2	0.00012085	0.00012329	0.0001123			21.2	0.0129517	0.0100342	0.0122803			21.2	0.0467071	0.000342	-9.7656e-06			21.2	0.0746728	0.00501709	-1.5869e-05			21.2	2.1973e-05	5.4932e-05				21.2	0.00047852	0.00050659	0.00938721	0.0083374			21.2	0.201353	0.244859	0.239294			21.2	0.0050171	0.005824	0.0031628
			21.3	0.00012085	0.00012329	0.00011353			21.3	0.0130127	0.0100342	0.0122925			21.3	0.0467071	0.000342	-8.5449e-06			21.3	0.0821407	0.00499268	-1.5869e-05			21.3	2.3193e-05	5.6152e-05				21.3	0.00047852	0.00050659	0.00939941	0.00838623			21.3	0.194176	0.237966	0.253647			21.3	0.0050452	0.0058069	0.0031885
			21.4	0.00012085	0.00012329	0.00011353			21.4	0.0130127	0.010022	0.0124023			21.4	0.0467071	0.000341	-8.5449e-06			21.4	0.0821407	0.00501709	-1.5869e-05			21.4	2.1973e-05	5.6152e-05				21.4	0.00047852	0.00050659	0.00938721	0.00834961			21.4	0.208529	0.244859	0.253647			21.4	0.0050562	0.0058069	0.003186
			21.5	0.00011963	0.00012329	0.00011353			21.5	0.0130127	0.00997314	0.0123291			21.5	0.0467071	0.000341	-8.5449e-06			21.5	0.0896086	0.00500488	-1.5869e-05			21.5	2.1973e-05	5.7373e-05				21.5	0.00047852	0.00050659	0.00939941	0.0083374			21.5	0.215706	0.244859	0.253647			21.5	0.0050537	0.0058118	0.0031824
			21.6	0.00012207	0.00012329	0.0001123			21.6	0.0129639	0.0100464	0.0123413			21.6	0.0467071	0.000341	-9.7656e-06			21.6	0.0821407	0.00498047	-1.709e-05			21.6	2.3193e-05	5.8594e-05				21.6	0.00047852	0.00050659	0.009375	0.00836182			21.6	0.215706	0.244859	0.253647			21.6	0.0050342	0.0058142	0.0031812
			21.7	0.00012085	0.00012451	0.00011353			21.7	0.0129883	0.0100464	0.0123657			21.7	0.0467071	0.000341	-8.5449e-06			21.7	0.0821407	0.00500488	-1.5869e-05			21.7	2.3193e-05	5.6152e-05				21.7	0.00047852	0.00050659	0.00936279	0.00838623			21.7	0.201353	0.258701	0.253647			21.7	0.0050171	0.0057898	0.0031799
			21.8	0.00012207	0.00012329	0.00011353			21.8	0.0129395	0.0100342	0.0123535			21.8	0.0374507	0.000341	-8.5449e-06			21.8	0.0821407	0.0050293	-1.709e-05			21.8	2.4414e-05	5.6152e-05				21.8	0.00047852	0.00050659	0.00938721	0.00836182			21.8	0.215706	0.251751	0.268059			21.8	0.0049988	0.0058459	0.0031641
			21.9	0.00012207	0.00012329	0.0001123			21.9	0.0129883	0.0100708	0.0123291			21.9	0.0374507	0.000342	-9.7656e-06			21.9	0.0821407	0.00501709	-1.5869e-05			21.9	2.4414e-05	5.8594e-05				21.9	0.00047729	0.00050537	0.00943604	0.00837402			21.9	0.215706	0.258701	0.260882			21.9	0.0050024	0.0058447	0.0031738
			22	0.00012207	0.00012329	0.0001123			22	0.0130371	0.010083	0.0124268			22	0.0467071	0.000341	-9.7656e-06			22	0.0821407	0.00499268	-1.5869e-05			22	2.1973e-05	5.6152e-05				22	0.00047974	0.00050659	0.00943604	0.00841064			22	0.222882	0.244859	0.268059			22	0.0050146	0.0058594	0.003186
			22.1	0.00012207	0.00012329	0.0001123			22.1	0.0130249	0.0100342	0.0124146			22.1	0.0467071	0.000341	-7.3242e-06			22.1	0.0896086	0.00499268	-1.5869e-05			22.1	2.3193e-05	5.7373e-05				22.1	0.00047852	0.00050659	0.00944824	0.00841064			22.1	0.230118	0.251751	0.253647			22.1	0.0050098	0.005885	0.0031946
			22.2	0.00012085	0.00012329	0.00011353			22.2	0.0130127	0.010083	0.012439			22.2	0.0467071	0.000341	-8.5449e-06			22.2	0.0821407	0.00500488	-1.5869e-05			22.2	2.3193e-05	5.7373e-05				22.2	0.00047852	0.00050415	0.00942383	0.00839844			22.2	0.237294	0.244859	0.260882			22.2	0.0050208	0.0058936	0.0031995
			22.3	0.00012207	0.00012451	0.00011353			22.3	0.0130371	0.0100464	0.0124512			22.3	0.0467071	0.000339	-8.5449e-06			22.3	0.0896086	0.00501709	-1.5869e-05			22.3	2.4414e-05	5.6152e-05				22.3	0.00047852	0.00050659	0.00943604	0.00839844			22.3	0.244471	0.244859	0.246471			22.3	0.005011	0.0058862	0.0032056
			22.4	0.00012207	0.00012451	0.0001123			22.4	0.0130127	0.0100342	0.0125122			22.4	0.0467071	0.000342	-9.7656e-06			22.4	0.0821407	0.0050293	-1.5869e-05			22.4	2.5635e-05	5.7373e-05				22.4	0.00047852	0.00050659	0.00944824	0.00837402			22.4	0.244471	0.244859	0.246471			22.4	0.0050195	0.0058765	0.0032581
			22.5	0.00012207	0.00012329	0.00011353			22.5	0.0130737	0.010022	0.0125			22.5	0.0467071	0.000341	-8.5449e-06			22.5	0.0821407	0.0050293	-1.5869e-05			22.5	2.5635e-05	5.6152e-05				22.5	0.00047729	0.00050659	0.00948486	0.00836182			22.5	0.266	0.237966	0.246471			22.5	0.0050085	0.0058557	0.0033374
			22.6	0.00012085	0.00012329	0.00011353			22.6	0.0131592	0.0100464	0.0125366			22.6	0.0467071	0.000341	-8.5449e-06			22.6	0.0821407	0.00510254	-1.5869e-05			22.6	2.5635e-05	5.7373e-05				22.6	0.00047852	0.00050537	0.00948486	0.00837402			22.6	0.258824	0.244859	0.239294			22.6	0.0050317	0.0058801	0.0033728
			22.7	0.00012329	0.00012451	0.00011353			22.7	0.0131226	0.0100098	0.0125732			22.7	0.0467071	0.000342	-8.5449e-06			22.7	0.0821407	0.00501709	-1.709e-05			22.7	2.4414e-05	5.7373e-05				22.7	0.00047852	0.00050537	0.00949707	0.00837402			22.7	0.266	0.237966	0.253647			22.7	0.0050317	0.0058862	0.0033948
			22.8	0.00012329	0.00012451	0.00011353			22.8	0.0130371	0.0100464	0.0125366			22.8	0.0467071	0.000343	-8.5449e-06			22.8	0.0896086	0.00499268	-1.709e-05			22.8	2.6855e-05	5.6152e-05				22.8	0.00047729	0.00050537	0.00947266	0.00837402			22.8	0.287529	0.244859	0.253647			22.8	0.0050244	0.005968	0.0034387
			22.9	0.00012329	0.00012451	0.0001123			22.9	0.0130127	0.0100952	0.0125488			22.9	0.0467071	0.000341	-9.7656e-06			22.9	0.0821407	0.0050293	-1.5869e-05			22.9	2.5635e-05	5.6152e-05				22.9	0.00047852	0.00050659	0.00948486	0.00839844			22.9	0.287529	0.251751	0.260882			22.9	0.005011	0.0060742	0.0034595
			23	0.00012329	0.00012451	0.00011353			23	0.0130005	0.0101318	0.0125244			23	0.0374507	0.000342	-9.7656e-06			23	0.0821407	0.0050415	-1.5869e-05			23	2.5635e-05	5.7373e-05				23	0.00047729	0.00050659	0.00943604	0.00841064			23	0.301882	0.258701	0.253647			23	0.0050232	0.0061707	0.0034863
			23.1	0.00012329	0.00012451	0.00011353			23.1	0.0130737	0.0101074	0.0124634			23.1	0.0467071	0.000342	-9.7656e-06			23.1	0.0896086	0.0050415	-1.4648e-05			23.1	2.5635e-05	5.7373e-05				23.1	0.00047852	0.00050659	0.00942383	0.00838623			23.1	0.316235	0.258701	0.260882			23.1	0.0050134	0.0064819	0.0036292
			23.2	0.00012451	0.00012329	0.00011475			23.2	0.0130493	0.0101318	0.0125977			23.2	0.0374507	0.000341	-8.5449e-06			23.2	0.0896086	0.00505371	-1.5869e-05			23.2	2.6855e-05	5.7373e-05				23.2	0.00047852	0.00050781	0.00942383	0.00842285			23.2	0.309059	0.258701	0.260882			23.2	0.0050232	0.0069543	0.0039709
			23.3	0.00012329	0.00012573	0.0001123			23.3	0.0130737	0.0101074	0.012561			23.3	0.0559712	0.000342	-9.7656e-06			23.3	0.0821407	0.0050415	-1.709e-05			23.3	2.5635e-05	5.8594e-05				23.3	0.00047852	0.00050659	0.00944824	0.00844727			23.3	0.337824	0.286271	0.268059			23.3	0.0050244	0.0073755	0.0041809
			23.4	0.00012207	0.00012329	0.00011353			23.4	0.0130981	0.0101807	0.0125977			23.4	0.0559712	0.000341	-8.5449e-06			23.4	0.0821407	0.00500488	-1.4648e-05			23.4	2.6855e-05	5.8594e-05				23.4	0.00047729	0.00050659	0.00943604	0.00844727			23.4	0.316235	0.286271	0.275235			23.4	0.0050293	0.0075989	0.0043201
			23.5	0.00012329	0.00012573	0.00011475			23.5	0.0130981	0.0101685	0.0126099			23.5	0.0559712	0.000341	-8.5449e-06			23.5	0.0821407	0.00500488	-1.4648e-05			23.5	2.5635e-05	5.7373e-05				23.5	0.00047974	0.00050537	0.00943604	0.00843506			23.5	0.345	0.279379	0.275235			23.5	0.0050366	0.0077295	0.0044275
			23.6	0.00012207	0.00012573	0.00011597			23.6	0.0131104	0.0101929	0.0126099			23.6	0.0467071	0.000341	-8.5449e-06			23.6	0.0821407	0.00506592	-1.5869e-05			23.6	2.6855e-05	5.7373e-05				23.6	0.00047852	0.00050781	0.00943604	0.00841064			23.6	0.323412	0.293164	0.289588			23.6	0.0050354	0.0077039	0.0044714
			23.7	0.00012451	0.00012573	0.00011475			23.7	0.0130493	0.0102051	0.0125732			23.7	0.0467071	0.000342	-8.5449e-06			23.7	0.0821407	0.00507813	-1.4648e-05			23.7	2.5635e-05	5.7373e-05				23.7	0.00047852	0.00050659	0.00944824	0.00837402			23.7	0.337824	0.306949	0.289588			23.7	0.0050317	0.0076013	0.0044897
			23.8	0.00012451	0.00012451	0.00011475			23.8	0.0131714	0.0102051	0.0126221			23.8	0.0559712	0.000343	-8.5449e-06			23.8	0.0896086	0.00511475	-1.5869e-05			23.8	2.5635e-05	5.7373e-05				23.8	0.00047852	0.00050781	0.00944824	0.00838623			23.8	0.337824	0.313842	0.296765			23.8	0.0050171	0.0074023	0.0045227
			23.9	0.00012329	0.00012451	0.00011597			23.9	0.0131836	0.0101685	0.0127075			23.9	0.0559712	0.000341	-9.7656e-06			23.9	0.0896086	0.00510254	-1.709e-05			23.9	2.6855e-05	5.8594e-05				23.9	0.00047852	0.00050659	0.00941162	0.00839844			23.9	0.337824	0.327627	0.303941			23.9	0.0050439	0.0072412	0.0045496
			24	0.00012329	0.00012451	0.00011597			24	0.0131714	0.0102051	0.0126343			24	0.0559712	0.000341	-9.7656e-06			24	0.0896086	0.00510254	-1.5869e-05			24	2.8076e-05	5.7373e-05				24	0.00047974	0.00050537	0.009375	0.00839844			24	0.345	0.320734	0.311118			24	0.0050439	0.007196	0.0045752
			24.1	0.00012329	0.00012573	0.00011719			24.1	0.0131592	0.0102295	0.0125854			24.1	0.0467071	0.000344	-8.5449e-06			24.1	0.0896086	0.00510254	-1.4648e-05			24.1	2.6855e-05	5.7373e-05				24.1	0.00047852	0.00050659	0.00942383	0.00839844			24.1	0.337824	0.33452	0.325471			24.1	0.0050439	0.0072034	0.0045959
			24.2	0.00012329	0.00012573	0.00011475			24.2	0.0131714	0.0102295	0.0125732			24.2	0.0467071	0.000342	-8.5449e-06			24.2	0.0896086	0.00515137	-1.5869e-05			24.2	2.6855e-05	5.7373e-05				24.2	0.00047852	0.00050659	0.009375	0.00839844			24.2	0.345	0.341412	0.339824			24.2	0.0050415	0.0072656	0.0046033
			24.3	0.00012451	0.00012573	0.00011597			24.3	0.0130859	0.0102295	0.0126099			24.3	0.0374507	0.000342	-8.5449e-06			24.3	0.0896086	0.00506592	-1.5869e-05			24.3	2.6855e-05	5.6152e-05				24.3	0.00047729	0.00050781	0.00939941	0.00839844			24.3	0.337824	0.348305	0.339824			24.3	0.0050342	0.0073694	0.0045679
			24.4	0.00012207	0.00012573	0.00011719			24.4	0.0131592	0.0102661	0.0126343			24.4	0.0374507	0.000341	-8.5449e-06			24.4	0.0896086	0.00506592	-1.5869e-05			24.4	2.6855e-05	5.7373e-05				24.4	0.00047852	0.00051025	0.00943604	0.00842285			24.4	0.337824	0.362147	0.354176			24.4	0.0050183	0.0074341	0.0045654
			24.5	0.00012451	0.00012573	0.00011719			24.5	0.0131104	0.0102539	0.0127075			24.5	0.0374507	0.000342	-9.7656e-06			24.5	0.0896086	0.00507813	-1.4648e-05			24.5	2.6855e-05	5.8594e-05				24.5	0.00047852	0.00051025	0.00947266	0.00843506			24.5	0.359353	0.36904	0.361412			24.5	0.005033	0.0074939	0.0045679
			24.6	0.00012451	0.00012695	0.00011719			24.6	0.0131592	0.0102539	0.0126343			24.6	0.0467071	0.000341	-9.7656e-06			24.6	0.0821407	0.00510254	-1.4648e-05			24.6	2.8076e-05	5.8594e-05				24.6	0.00047852	0.0005127	0.00942383	0.00843506			24.6	0.359353	0.382825	0.375765			24.6	0.0050427	0.0075623	0.0045496
			24.7	0.00012451	0.00012695	0.00011597			24.7	0.013147	0.0102905	0.0126099			24.7	0.0467071	0.000341	-9.7656e-06			24.7	0.0896086	0.00507813	-1.4648e-05			24.7	2.6855e-05	5.7373e-05				24.7	0.00047852	0.00051147	0.00943604	0.00842285			24.7	0.373706	0.389718	0.375765			24.7	0.0050342	0.0075671	0.0045166
			24.8	0.00012451	0.00012573	0.00011719			24.8	0.013147	0.0103027	0.0125732			24.8	0.0467071	0.000342	-8.5449e-06			24.8	0.0821407	0.00507813	-1.4648e-05			24.8	2.9297e-05	5.7373e-05				24.8	0.00047974	0.0005127	0.00943604	0.00842285			24.8	0.373706	0.389718	0.382941			24.8	0.0050354	0.0075549	0.0044751
			24.9	0.00012573	0.00012573	0.00011841			24.9	0.0131226	0.0102905	0.0126221			24.9	0.0467071	0.000341	-9.7656e-06			24.9	0.0896086	0.00507813	-1.4648e-05			24.9	2.8076e-05	5.7373e-05				24.9	0.00047974	0.0005127	0.00944824	0.00841064			24.9	0.380882	0.417288	0.397294			24.9	0.0050293	0.0075525	0.0044189
			25	0.00012451	0.00012695	0.00011841			25	0.0131836	0.0102905	0.0126221			25	0.0467071	0.000342	-8.5449e-06			25	0.0896086	0.00507813	-1.3428e-05			25	2.8076e-05	5.8594e-05				25	0.00047852	0.00051392	0.00946045	0.00842285			25	0.402412	0.417288	0.411647			25	0.0050269	0.0075671	0.0043359
			25.1	0.00012451	0.00012573	0.00011719			25.1	0.013208	0.0103149	0.0127197			25.1	0.0467071	0.000341	-7.3242e-06			25.1	0.0896086	0.00509033	-1.4648e-05			25.1	2.8076e-05	5.8594e-05				25.1	0.00047852	0.00051514	0.00953369	0.00839844			25.1	0.409588	0.417288	0.418824			25.1	0.0050293	0.0075635	0.0043042
			25.2	0.00012329	0.00012695	0.00011841			25.2	0.0132324	0.0102905	0.0126709			25.2	0.0374507	0.000341	-8.5449e-06			25.2	0.0896086	0.00511475	-1.5869e-05			25.2	2.8076e-05	5.7373e-05				25.2	0.00047852	0.00051392	0.00953369	0.00839844			25.2	0.409588	0.437966	0.426			25.2	0.00505	0.0075513	0.0042371
			25.3	0.00012573	0.00012573	0.00011963			25.3	0.0132324	0.0103638	0.0127075			25.3	0.0374507	0.000341	-7.3242e-06			25.3	0.0896086	0.00509033	-1.5869e-05			25.3	3.0518e-05	5.8594e-05				25.3	0.00047974	0.00051514	0.00957031	0.00842285			25.3	0.416765	0.431073	0.440353			25.3	0.0050439	0.0075647	0.0042249
			25.4	0.00012451	0.00012817	0.00011841			25.4	0.0132202	0.010376	0.0127319			25.4	0.0467071	0.000341	-8.5449e-06			25.4	0.0896086	0.00510254	-1.3428e-05			25.4	3.1738e-05	5.8594e-05				25.4	0.00047852	0.00051636	0.00959473	0.00844727			25.4	0.423941	0.431073	0.440353			25.4	0.0050415	0.0075647	0.00427
			25.5	0.00012451	0.00012695	0.00011841			25.5	0.0131958	0.0103638	0.0127563			25.5	0.0467071	0.000342	-9.7656e-06			25.5	0.0896086	0.00509033	-1.3428e-05			25.5	3.1738e-05	5.9814e-05				25.5	0.00047852	0.00051758	0.00955811	0.00844727			25.5	0.431118	0.444859	0.461941			25.5	0.0050366	0.0075513	0.0042993
			25.6	0.00012451	0.00012695	0.00011963			25.6	0.0132324	0.0103638	0.0127441			25.6	0.0467071	0.000342	-8.5449e-06			25.6	0.0896086	0.00507813	-1.3428e-05			25.6	3.0518e-05	5.8594e-05				25.6	0.00047974	0.00051758	0.00950928	0.00843506			25.6	0.445529	0.444859	0.454706			25.6	0.0050256	0.0076099	0.0043213
			25.7	0.00012451	0.00012451	0.00011841			25.7	0.0132202	0.0104004	0.012793			25.7	0.0467071	0.000341	-7.3242e-06			25.7	0.0821407	0.00510254	-1.4648e-05			25.7	2.9297e-05	5.8594e-05				25.7	0.00047974	0.0005188	0.00949707	0.00844727			25.7	0.459882	0.444859	0.461941			25.7	0.0050244	0.0076086	0.0043591
			25.8	0.00012451	0.00012573	0.00011841			25.8	0.013208	0.0103638	0.0128174			25.8	0.0467071	0.000342	-8.5449e-06			25.8	0.0821407	0.00509033	-1.3428e-05			25.8	2.9297e-05	5.7373e-05				25.8	0.00047974	0.00052124	0.00948486	0.00842285			25.8	0.452706	0.451751	0.476294			25.8	0.0050745	0.0075989	0.0043604
			25.9	0.00012451	0.00012695	0.00011841			25.9	0.0132202	0.0104004	0.0128174			25.9	0.0559712	0.000342	-8.5449e-06			25.9	0.0896086	0.00511475	-1.4648e-05			25.9	2.9297e-05	5.8594e-05				25.9	0.00047974	0.00052246	0.00946045	0.00842285			25.9	0.474235	0.458701	0.483471			25.9	0.0050708	0.0076013	0.0043555
			26	0.00012573	0.00012817	0.00011841			26	0.0132324	0.0104004	0.0128052			26	0.0467071	0.000343	-8.5449e-06			26	0.0896086	0.00513916	-1.5869e-05			26	2.8076e-05	5.9814e-05				26	0.00047974	0.00052368	0.00948486	0.00843506			26	0.481412	0.451751	0.490647			26	0.0050684	0.0076038	0.0043518
			26.1	0.00012573	0.00012695	0.00011963			26.1	0.0131958	0.0104004	0.0128418			26.1	0.0467071	0.000341	-8.5449e-06			26.1	0.0970765	0.00510254	-1.4648e-05			26.1	2.9297e-05	5.8594e-05				26.1	0.00047974	0.0005249	0.00948486	0.00842285			26.1	0.467059	0.465593	0.505			26.1	0.0050598	0.0075879	0.0043652
			26.2	0.00012451	0.00012695	0.00011841			26.2	0.0132202	0.0104004	0.0127563			26.2	0.0374507	0.000341	-8.5449e-06			26.2	0.0896086	0.00511475	-1.4648e-05			26.2	2.8076e-05	5.8594e-05				26.2	0.00047974	0.0005249	0.00948486	0.00839844			26.2	0.481412	0.472486	0.512176			26.2	0.0050525	0.0076025	0.0043713
			26.3	0.00012573	0.00012695	0.00011963			26.3	0.0132446	0.0104004	0.0128296			26.3	0.0467071	0.000342	-8.5449e-06			26.3	0.0821407	0.00512695	-1.3428e-05			26.3	2.9297e-05	5.8594e-05				26.3	0.00047974	0.0005249	0.00949707	0.00841064			26.3	0.488588	0.472486	0.526529			26.3	0.0050452	0.0076099	0.0043958
			26.4	0.00012451	0.00012695	0.00011963			26.4	0.0132568	0.0104004	0.0128296			26.4	0.0467071	0.000342	-8.5449e-06			26.4	0.0970765	0.00510254	-1.3428e-05			26.4	2.8076e-05	5.8594e-05				26.4	0.00047852	0.00052612	0.00949707	0.00842285			26.4	0.488588	0.486271	0.526529			26.4	0.0050317	0.0076172	0.0044128
			26.5	0.00012451	0.00012695	0.00011963			26.5	0.0132935	0.0104248	0.0128174			26.5	0.0559712	0.000342	-8.5449e-06			26.5	0.0970765	0.00512695	-1.3428e-05			26.5	2.9297e-05	5.8594e-05				26.5	0.00047974	0.00052612	0.00946045	0.00842285			26.5	0.502941	0.493164	0.533706			26.5	0.0050366	0.0076013	0.0044116
			26.6	0.00012451	0.00012573	0.00011963			26.6	0.0132935	0.0104126	0.0128784			26.6	0.0467071	0.000341	-8.5449e-06			26.6	0.0896086	0.00510254	-1.4648e-05			26.6	2.9297e-05	5.8594e-05				26.6	0.00047974	0.0005249	0.00948486	0.00844727			26.6	0.495765	0.500056	0.540882			26.6	0.0050403	0.0076172	0.0044019
			26.7	0.00012573	0.00012817	0.00012085			26.7	0.013208	0.0102905	0.0128784			26.7	0.0467071	0.000342	-7.3242e-06			26.7	0.0970765	0.00512695	-1.3428e-05			26.7	2.9297e-05	5.8594e-05				26.7	0.00047852	0.00052612	0.00948486	0.00843506			26.7	0.502941	0.506949	0.548059			26.7	0.0050464	0.007594	0.0043921
			26.8	0.00012573	0.00012695	0.00012085			26.8	0.0132324	0.0102905	0.0128784			26.8	0.0467071	0.000341	-8.5449e-06			26.8	0.0896086	0.00516357	-1.3428e-05			26.8	2.9297e-05	5.8594e-05				26.8	0.00047974	0.0005249	0.00948486	0.00844727			26.8	0.502941	0.513842	0.555235			26.8	0.0050476	0.0075793	0.0043896
			26.9	0.00012573	0.00012817	0.00011963			26.9	0.0133301	0.0103394	0.0129272			26.9	0.0467071	0.000342	-8.5449e-06			26.9	0.0821407	0.00516357	-1.4648e-05			26.9	2.8076e-05	5.8594e-05				26.9	0.00047852	0.00052856	0.00947266	0.00847168			26.9	0.517294	0.513842	0.555235			26.9	0.0050305	0.0075842	0.0043835
			27	0.00012451	0.00012817	0.00012085			27	0.0133423	0.0103271	0.0129761			27	0.0467071	0.000341	-7.3242e-06			27	0.0896086	0.00513916	-1.4648e-05			27	3.0518e-05	5.8594e-05				27	0.00047974	0.00052612	0.00949707	0.00845947			27	0.517294	0.520734	0.555235			27	0.005022	0.007572	0.0044177
			27.1	0.00012695	0.00012817	0.00012207			27.1	0.0132813	0.0103516	0.0130249			27.1	0.0559712	0.000341	-8.5449e-06			27.1	0.0970765	0.00509033	-1.4648e-05			27.1	3.0518e-05	5.8594e-05				27.1	0.00047852	0.00052856	0.00947266	0.00843506			27.1	0.524471	0.527627	0.569647			27.1	0.0050403	0.0075757	0.0044287
			27.2	0.00012695	0.00012939	0.00011963			27.2	0.0133301	0.0103638	0.0130493			27.2	0.0467071	0.000342	-8.5449e-06			27.2	0.0896086	0.00511475	-1.4648e-05			27.2	3.0518e-05	5.8594e-05				27.2	0.00047974	0.00052856	0.00949707	0.00847168			27.2	0.538882	0.53452	0.584			27.2	0.0050415	0.007583	0.0044385
			27.3	0.00012573	0.00012817	0.00012085			27.3	0.0133179	0.0103638	0.0130371			27.3	0.0467071	0.000342	-8.5449e-06			27.3	0.0896086	0.00512695	-1.4648e-05			27.3	2.9297e-05	5.9814e-05				27.3	0.00047974	0.00052979	0.00949707	0.00847168			27.3	0.538882	0.53452	0.591176			27.3	0.0050354	0.0075757	0.0044434
			27.4	0.00012573	0.00012817	0.00012085			27.4	0.0131958	0.010376	0.0129761			27.4	0.0559712	0.000342	-8.5449e-06			27.4	0.0896086	0.00511475	-1.3428e-05			27.4	3.0518e-05	5.8594e-05				27.4	0.00047852	0.00052979	0.00947266	0.00843506			27.4	0.546059	0.53452	0.598353			27.4	0.0050391	0.00755	0.0044714
			27.5	0.00012573	0.00012817	0.00012085			27.5	0.0132324	0.010437	0.0130249			27.5	0.0467071	0.000342	-8.5449e-06			27.5	0.0970765	0.00513916	-1.4648e-05			27.5	3.0518e-05	5.7373e-05				27.5	0.00047974	0.00052856	0.00944824	0.00844727			27.5	0.538882	0.548305	0.591176			27.5	0.005033	0.0075354	0.0044617
			27.6	0.00012573	0.00012817	0.00012085			27.6	0.0132446	0.0104004	0.0130249			27.6	0.0467071	0.000342	-8.5449e-06			27.6	0.0970765	0.00515137	-1.4648e-05			27.6	3.0518e-05	5.8594e-05				27.6	0.00047852	0.00053101	0.00947266	0.00844727			27.6	0.538882	0.562147	0.598353			27.6	0.0050159	0.0075403	0.0044592
			27.7	0.00012573	0.00012939	0.00012085			27.7	0.0132935	0.010376	0.0130127			27.7	0.0467071	0.000343	-8.5449e-06			27.7	0.0970765	0.00512695	-1.3428e-05			27.7	2.9297e-05	5.9814e-05				27.7	0.00047974	0.00052979	0.00946045	0.00845947			27.7	0.560412	0.548305	0.605529			27.7	0.0050378	0.0075452	0.0044373
			27.8	0.00012573	0.00012939	0.00012085			27.8	0.0133545	0.010437	0.0129761			27.8	0.0467071	0.000342	-9.7656e-06			27.8	0.0970765	0.00512695	-1.3428e-05			27.8	3.0518e-05	5.9814e-05				27.8	0.00047974	0.00052979	0.00949707	0.00844727			27.8	0.553235	0.562147	0.598353			27.8	0.0050403	0.0075342	0.0044324
			27.9	0.00012451	0.00012817	0.00012085			27.9	0.0133301	0.0104004	0.0129883			27.9	0.0467071	0.000342	-9.7656e-06			27.9	0.0970765	0.00513916	-1.4648e-05			27.9	3.0518e-05	5.9814e-05				27.9	0.00047974	0.00052856	0.00952148	0.00849609			27.9	0.560412	0.555254	0.612706			27.9	0.0050464	0.007522	0.0044275
			28	0.00012573	0.00012939	0.00012207			28	0.0132813	0.0104126	0.0130127			28	0.0467071	0.000341	-8.5449e-06			28	0.104538	0.00512695	-1.3428e-05			28	3.1738e-05	5.8594e-05				28	0.00047852	0.00053101	0.00948486	0.00847168			28	0.567588	0.562147	0.605529			28	0.0050391	0.0074963	0.0044177
			28.1	0.00012451	0.00012939	0.00012207			28.1	0.0134033	0.010437	0.0130615			28.1	0.0467071	0.000342	-8.5449e-06			28.1	0.0970765	0.00513916	-1.3428e-05			28.1	3.0518e-05	5.8594e-05				28.1	0.00047852	0.00053101	0.00947266	0.00849609			28.1	0.574765	0.56904	0.619882			28.1	0.0050403	0.007522	0.0044031
			28.2	0.00012573	0.00012939	0.00012085			28.2	0.0134033	0.010437	0.0130615			28.2	0.0467071	0.000341	-7.3242e-06			28.2	0.0896086	0.00516357	-1.3428e-05			28.2	3.1738e-05	5.8594e-05				28.2	0.00047852	0.00053223	0.00946045	0.0085083			28.2	0.581941	0.56904	0.627059			28.2	0.0050244	0.007511	0.0044092
			28.3	0.00012573	0.00012939	0.00012085			28.3	0.0134033	0.0104126	0.0130493			28.3	0.0467071	0.000342	-7.3242e-06			28.3	0.0896086	0.00516357	-1.4648e-05			28.3	3.0518e-05	5.8594e-05				28.3	0.00047974	0.00052979	0.00943604	0.00849609			28.3	0.574765	0.575932	0.627059			28.3	0.0050342	0.0075061	0.0044165
			28.4	0.00012451	0.00012817	0.00012329			28.4	0.0133911	0.0104614	0.0130371			28.4	0.0467071	0.000339	-8.5449e-06			28.4	0.104538	0.00516357	-1.2207e-05			28.4	3.1738e-05	5.9814e-05				28.4	0.00047852	0.00052979	0.00946045	0.00847168			28.4	0.574765	0.582825	0.634235			28.4	0.0050378	0.0075085	0.0044092
			28.5	0.00012451	0.00012939	0.00012085			28.5	0.0133789	0.0104858	0.0130615			28.5	0.0374507	0.000342	-7.3242e-06			28.5	0.104538	0.00517578	-1.3428e-05			28.5	3.1738e-05	5.8594e-05				28.5	0.00047974	0.00053223	0.00942383	0.00847168			28.5	0.574765	0.582825	0.634235			28.5	0.005033	0.007511	0.0044226
			28.6	0.00012573	0.00012939	0.00012085			28.6	0.0133545	0.0105347	0.0130737			28.6	0.0467071	0.000343	-8.5449e-06			28.6	0.104538	0.00515137	-1.4648e-05			28.6	3.1738e-05	5.8594e-05				28.6	0.00047852	0.00053223	0.00944824	0.00845947			28.6	0.596294	0.575932	0.648588			28.6	0.0050208	0.0075061	0.004436
			28.7	0.00012573	0.00012817	0.00012207			28.7	0.0134644	0.0105469	0.0130249			28.7	0.0467071	0.000342	-7.3242e-06			28.7	0.0970765	0.00515137	-1.3428e-05			28.7	2.9297e-05	5.9814e-05				28.7	0.00047974	0.00053223	0.00948486	0.00845947			28.7	0.596294	0.582825	0.655765			28.7	0.0050244	0.0075232	0.0044714
			28.8	0.00012451	0.00012817	0.00012451			28.8	0.0134155	0.0105103	0.0131348			28.8	0.0467071	0.000343	-7.3242e-06			28.8	0.104538	0.00517578	-1.4648e-05			28.8	2.9297e-05	6.2256e-05				28.8	0.00047852	0.00053345	0.00950928	0.00848389			28.8	0.596294	0.59661	0.655765			28.8	0.0050232	0.0075366	0.0045068
			28.9	0.00012573	0.00012939	0.00012329			28.9	0.0133911	0.0105103	0.0131104			28.9	0.0467071	0.000342	-7.3242e-06			28.9	0.0970765	0.00517578	-1.3428e-05			28.9	3.0518e-05	6.1035e-05				28.9	0.00048096	0.00053223	0.00950928	0.0085083			28.9	0.603471	0.589718	0.648588			28.9	0.005022	0.0075293	0.0045728
			29	0.00012573	0.00012817	0.00012207			29	0.0134033	0.0105469	0.0131226			29	0.0467071	0.000343	-8.5449e-06			29	0.0896086	0.00518799	-1.2207e-05			29	3.0518e-05	6.2256e-05				29	0.00048096	0.00053345	0.00957031	0.00848389			29	0.603471	0.603503	0.663			29	0.0050403	0.0075366	0.004585
			29.1	0.00012695	0.00013062	0.00012207			29.1	0.0134277	0.0105347	0.0130981			29.1	0.0467071	0.000342	-8.5449e-06			29.1	0.0970765	0.00515137	-1.3428e-05			29.1	2.9297e-05	6.1035e-05				29.1	0.00048096	0.00053345	0.00963135	0.00849609			29.1	0.603471	0.610395	0.663			29.1	0.0050439	0.0075293	0.004613
			29.2	0.00012329	0.00012817	0.00012329			29.2	0.0134277	0.0105347	0.0131348			29.2	0.0467071	0.000342	-8.5449e-06			29.2	0.0970765	0.00511475	-1.3428e-05			29.2	2.9297e-05	5.9814e-05				29.2	0.00048096	0.00053467	0.00974121	0.00844727			29.2	0.610647	0.59661	0.663			29.2	0.0050513	0.0075244	0.004635
			29.3	0.00012451	0.00012817	0.00012329			29.3	0.0134399	0.0105347	0.0131104			29.3	0.0467071	0.000342	-7.3242e-06			29.3	0.104538	0.00513916	-1.3428e-05			29.3	2.9297e-05	5.9814e-05				29.3	0.00048096	0.00053345	0.00981445	0.00845947			29.3	0.603471	0.610395	0.670176			29.3	0.0050476	0.0075195	0.0046436
			29.4	0.00012573	0.00012939	0.00012329			29.4	0.0134399	0.0105469	0.0132324			29.4	0.0467071	0.000342	-8.5449e-06			29.4	0.104538	0.00518799	-1.3428e-05			29.4	3.1738e-05	5.9814e-05				29.4	0.00047974	0.00053223	0.00985107	0.00847168			29.4	0.610647	0.617288	0.677353			29.4	0.0050378	0.0075464	0.004646
			29.5	0.00012695	0.00012939	0.00012207			29.5	0.0134277	0.0105713	0.013208			29.5	0.0467071	0.000342	-8.5449e-06			29.5	0.104538	0.00516357	-1.3428e-05			29.5	3.1738e-05	5.8594e-05				29.5	0.00047852	0.00053345	0.00991211	0.00843506			29.5	0.625	0.610395	0.677353			29.5	0.0050293	0.007533	0.0046802
			29.6	0.00012695	0.00012939	0.00012329			29.6	0.0134521	0.0105713	0.0131836			29.6	0.0467071	0.000342	-8.5449e-06			29.6	0.0970765	0.00516357	-1.3428e-05			29.6	3.0518e-05	6.1035e-05				29.6	0.00047974	0.00053345	0.0100342	0.00849609			29.6	0.610647	0.617288	0.677353			29.6	0.0050659	0.0075244	0.0046924
			29.7	0.00012573	0.00012817	0.00012085			29.7	0.0134399	0.0105835	0.0131592			29.7	0.0467071	0.000341	-8.5449e-06			29.7	0.104538	0.00518799	-1.4648e-05			29.7	3.1738e-05	6.1035e-05				29.7	0.00048096	0.00053467	0.010144	0.00847168			29.7	0.617824	0.610395	0.684529			29.7	0.0050671	0.007533	0.0047034
			29.8	0.00012573	0.00012817	0.00012207			29.8	0.0134277	0.0105591	0.0131714			29.8	0.0467071	0.000343	-8.5449e-06			29.8	0.104538	0.00516357	-1.2207e-05			29.8	3.0518e-05	6.2256e-05				29.8	0.00047974	0.00053467	0.0102417	0.00844727			29.8	0.617824	0.617288	0.691706			29.8	0.005072	0.0075208	0.0047107
			29.9	0.00012573	0.00012939	0.00012329			29.9	0.0134277	0.0105713	0.0131714			29.9	0.0559712	0.000343	-8.5449e-06			29.9	0.0970765	0.0052002	-1.2207e-05			29.9	3.0518e-05	6.1035e-05				29.9	0.00047974	0.00053345	0.0103271	0.00843506			29.9	0.632176	0.617288	0.698882			29.9	0.0050659	0.0075037	0.0047058
			30	0.00012573	0.00012817	0.00012207			30	0.0134521	0.0105957	0.0132568			30	0.0467071	0.000341	-7.3242e-06			30	0.0970765	0.0052002	-1.3428e-05			30	3.0518e-05	6.2256e-05				30	0.00047729	0.00053467	0.0104248	0.00847168			30	0.639412	0.617288	0.698882			30	0.0050696	0.0075134	0.0047058
			30.1	0.00012573	0.00012817	0.00012329			30.1	0.0134644	0.0105957	0.013269			30.1	0.0467071	0.000342	-7.3242e-06			30.1	0.0970765	0.00512695	-1.2207e-05			30.1	3.1738e-05	6.2256e-05				30.1	0.00048096	0.00053467	0.010498	0.00847168			30.1	0.639412	0.617288	0.698882			30.1	0.0050378	0.0075183	0.0046973
			30.2	0.00012695	0.00012939	0.00012329			30.2	0.0134644	0.0105225	0.0132568			30.2	0.0559712	0.000339	-8.5449e-06			30.2	0.0970765	0.00516357	-1.3428e-05			30.2	3.1738e-05	6.1035e-05				30.2	0.00048096	0.00053589	0.0105347	0.00849609			30.2	0.632176	0.624181	0.691706			30.2	0.0050391	0.0075098	0.0047156
			30.3	0.00012695	0.00012939	0.00012329			30.3	0.0134399	0.0106445	0.013269			30.3	0.0559712	0.000342	-7.3242e-06			30.3	0.0970765	0.00515137	-1.2207e-05			30.3	3.2959e-05	6.1035e-05				30.3	0.00048096	0.00053467	0.0105957	0.0085083			30.3	0.639412	0.644859	0.713235			30.3	0.0050391	0.0075122	0.0046973
			30.4	0.00012695	0.00013062	0.00012329			30.4	0.0134766	0.0107056	0.013269			30.4	0.0559712	0.000343	-7.3242e-06			30.4	0.104538	0.00516357	-1.3428e-05			30.4	3.1738e-05	6.2256e-05				30.4	0.00048096	0.00053711	0.0106201	0.0085083			30.4	0.632176	0.631073	0.713235			30.4	0.0050635	0.0075244	0.0046948
			30.5	0.00012573	0.00012939	0.00012329			30.5	0.0134888	0.0107178	0.0131958			30.5	0.0559712	0.000342	-8.5449e-06			30.5	0.0970765	0.00522461	-1.4648e-05			30.5	3.1738e-05	6.1035e-05				30.5	0.00048096	0.00053467	0.0106567	0.00848389			30.5	0.646588	0.644859	0.698882			30.5	0.0050806	0.0075342	0.0047046
			30.6	0.00012695	0.00012817	0.00012451			30.6	0.0135742	0.0107056	0.0132202			30.6	0.0559712	0.000343	-7.3242e-06			30.6	0.0970765	0.00523682	-1.3428e-05			30.6	3.1738e-05	6.2256e-05				30.6	0.00047974	0.00053589	0.0106689	0.00848389			30.6	0.632176	0.644859	0.706059			30.6	0.0050769	0.0075793	0.0046973
			30.7	0.00012695	0.00012939	0.00012329			30.7	0.0135986	0.0106445	0.0132446			30.7	0.0559712	0.000343	-7.3242e-06			30.7	0.104538	0.00522461	-1.3428e-05			30.7	3.1738e-05	6.2256e-05				30.7	0.00048096	0.00053467	0.0106934	0.00844727			30.7	0.653765	0.637966	0.720412			30.7	0.005061	0.0076013	0.0046826
			30.8	0.00012695	0.00013062	0.00012451			30.8	0.0135986	0.0106445	0.0132324			30.8	0.0559712	0.000343	-7.3242e-06			30.8	0.104538	0.00522461	-1.2207e-05			30.8	3.1738e-05	6.3477e-05				30.8	0.00047974	0.00053711	0.0106812	0.00849609			30.8	0.639412	0.651808	0.720412			30.8	0.0050867	0.0076001	0.004707
			30.9	0.00012573	0.00012939	0.00012329			30.9	0.0136108	0.0106934	0.0133057			30.9	0.0559712	0.000341	-7.3242e-06			30.9	0.0970765	0.00522461	-1.2207e-05			30.9	3.1738e-05	6.2256e-05				30.9	0.00048096	0.00053711	0.0107544	0.00849609			30.9	0.639412	0.665593	0.713235			30.9	0.0051575	0.0075989	0.004707
			31	0.00012817	0.00012939	0.00012329			31	0.0135986	0.0106445	0.0132935			31	0.0559712	0.000342	-7.3242e-06			31	0.104538	0.0052002	-1.2207e-05			31	3.1738e-05	6.3477e-05				31	0.00048096	0.00053467	0.0107422	0.0085083			31	0.646588	0.658701	0.720412			31	0.0051929	0.0075903	0.0047058
			31.1	0.00012695	0.00012939	0.00012451			31.1	0.0135498	0.0106934	0.0132446			31.1	0.0467071	0.000342	-7.3242e-06			31.1	0.104538	0.00518799	-1.3428e-05			31.1	3.2959e-05	6.3477e-05				31.1	0.00048096	0.00053711	0.01073	0.00849609			31.1	0.653765	0.672486	0.727588			31.1	0.0052368	0.0075671	0.0047095
			31.2	0.00012695	0.00013062	0.00012451			31.2	0.0136475	0.0106934	0.0133179			31.2	0.0559712	0.000343	-8.5449e-06			31.2	0.104538	0.0052002	-1.2207e-05			31.2	3.2959e-05	6.2256e-05				31.2	0.00047974	0.00053711	0.01073	0.00852051			31.2	0.653765	0.658701	0.727588			31.2	0.0052844	0.0075439	0.0047083
			31.3	0.00012573	0.00012939	0.00012329			31.3	0.0136353	0.0106689	0.0133301			31.3	0.0374507	0.000342	-8.5449e-06			31.3	0.0970765	0.00518799	-1.3428e-05			31.3	3.2959e-05	6.2256e-05				31.3	0.00047852	0.00053711	0.01073	0.0085083			31.3	0.653765	0.651808	0.720412			31.3	0.005354	0.0075684	0.0047009
			31.4	0.00012573	0.00013062	0.00012329			31.4	0.0136353	0.0106445	0.0133423			31.4	0.0467071	0.000342	-7.3242e-06			31.4	0.112006	0.00531006	-1.3428e-05			31.4	3.2959e-05	6.2256e-05				31.4	0.00047974	0.00053955	0.0106689	0.00855713			31.4	0.668118	0.665593	0.727588			31.4	0.0053833	0.007583	0.004707
			31.5	0.00012695	0.00012939	0.00012329			31.5	0.013623	0.0106934	0.0133911			31.5	0.0559712	0.000342	-7.3242e-06			31.5	0.104538	0.00539551	-1.3428e-05			31.5	3.2959e-05	6.2256e-05				31.5	0.00047852	0.00053711	0.0107056	0.00856934			31.5	0.660941	0.665593	0.734765			31.5	0.0053894	0.0075757	0.0047205
			31.6	0.00012695	0.00012939	0.00012695			31.6	0.0135864	0.0106812	0.0134155			31.6	0.0467071	0.000342	-7.3242e-06			31.6	0.0970765	0.00535889	-1.2207e-05			31.6	3.2959e-05	6.2256e-05				31.6	0.00047974	0.00053833	0.01073	0.00852051			31.6	0.675294	0.665593	0.727588			31.6	0.005415	0.0075745	0.0047302
			31.7	0.00012695	0.00013062	0.00012451			31.7	0.0135376	0.0106812	0.0133545			31.7	0.0467071	0.000343	-8.5449e-06			31.7	0.104538	0.00534668	-1.2207e-05			31.7	3.2959e-05	6.2256e-05				31.7	0.00048096	0.00053955	0.0107056	0.00854492			31.7	0.682471	0.672486	0.741941			31.7	0.0055457	0.0075745	0.0047241
			31.8	0.00012695	0.00013062	0.00012451			31.8	0.0136475	0.0107056	0.0133423			31.8	0.0559712	0.000341	-8.5449e-06			31.8	0.0970765	0.00537109	-1.3428e-05			31.8	3.2959e-05	6.2256e-05				31.8	0.00048096	0.00053955	0.0107056	0.00853271			31.8	0.675294	0.665593	0.734765			31.8	0.005719	0.0075403	0.004729
			31.9	0.00012695	0.00012939	0.00012451			31.9	0.0136353	0.0107178	0.0133789			31.9	0.0467071	0.000342	-7.3242e-06			31.9	0.104538	0.00539551	-1.2207e-05			31.9	3.2959e-05	6.2256e-05				31.9	0.0004834	0.00054077	0.01073	0.00854492			31.9	0.675294	0.679379	0.741941			31.9	0.0058301	0.007561	0.0047351
			32	0.00012573	0.00012939	0.00012695			32	0.0136353	0.0106934	0.0133667			32	0.0467071	0.000342	-7.3242e-06			32	0.112006	0.00543213	-1.2207e-05			32	3.418e-05	6.2256e-05				32	0.00048462	0.00053955	0.0107422	0.0085083			32	0.682471	0.672486	0.741941			32	0.0058777	0.00755	0.0047241
			32.1	0.00012695	0.00013062	0.00012451			32.1	0.013623	0.0107544	0.0133545			32.1	0.0559712	0.000342	-8.5449e-06			32.1	0.104538	0.00543213	-1.3428e-05			32.1	3.418e-05	6.2256e-05				32.1	0.00048706	0.00053955	0.0107666	0.00844727			32.1	0.682471	0.672486	0.749118			32.1	0.0059497	0.0075574	0.0047473
			32.2	0.00012695	0.00012939	0.00012451			32.2	0.0136108	0.0108032	0.0133667			32.2	0.0652504	0.000342	-8.5449e-06			32.2	0.104538	0.00528564	-1.2207e-05			32.2	3.418e-05	6.2256e-05				32.2	0.00049072	0.00054077	0.0107666	0.00844727			32.2	0.682471	0.665593	0.749118			32.2	0.0059998	0.0075623	0.0047546
			32.3	0.00012573	0.00013062	0.00012573			32.3	0.0135376	0.0108032	0.0133545			32.3	0.0652504	0.000342	-6.1035e-06			32.3	0.104538	0.00522461	-1.2207e-05			32.3	3.2959e-05	6.2256e-05				32.3	0.00049316	0.00053955	0.01073	0.00853271			32.3	0.675294	0.665593	0.749118			32.3	0.0060034	0.0075549	0.004751
			32.4	0.00012695	0.00012939	0.00012573			32.4	0.0136597	0.0108154	0.0133179			32.4	0.0467071	0.000342	-7.3242e-06			32.4	0.104538	0.00531006	-1.3428e-05			32.4	3.2959e-05	6.2256e-05				32.4	0.00049194	0.00053955	0.0107178	0.00848389			32.4	0.675294	0.672486	0.741941			32.4	0.0059729	0.007522	0.0047449
			32.5	0.00012817	0.00013062	0.00012573			32.5	0.0136108	0.0108032	0.0134033			32.5	0.0559712	0.000343	-7.3242e-06			32.5	0.104538	0.00537109	-1.3428e-05			32.5	3.2959e-05	6.2256e-05				32.5	0.00049194	0.00053955	0.0106934	0.00852051			32.5	0.675294	0.672486	0.756294			32.5	0.0058936	0.0075403	0.0047375
			32.6	0.00012817	0.00013062	0.00012573			32.6	0.0136597	0.0107666	0.0133911			32.6	0.0652504	0.000342	-7.3242e-06			32.6	0.104538	0.00539551	-1.2207e-05			32.6	3.418e-05	6.3477e-05				32.6	0.00049072	0.00054077	0.0106689	0.00856934			32.6	0.682471	0.672486	0.763471			32.6	0.0058093	0.0075732	0.0047034
			32.7	0.00012573	0.00013184	0.00012817			32.7	0.0136719	0.0107788	0.0134033			32.7	0.0559712	0.000342	-7.3242e-06			32.7	0.0970765	0.00543213	-1.3428e-05			32.7	3.2959e-05	6.2256e-05				32.7	0.00049072	0.00054077	0.0107056	0.00859375			32.7	0.682471	0.679379	0.749118			32.7	0.0057629	0.0075867	0.0047156
			32.8	0.00012573	0.00013062	0.00012085			32.8	0.013623	0.0108154	0.0134277			32.8	0.0652504	0.000341	-7.3242e-06			32.8	0.112006	0.00544434	-1.2207e-05			32.8	3.418e-05	6.2256e-05				32.8	0.00048828	0.00053955	0.0106812	0.00866699			32.8	0.689647	0.686271	0.749118			32.8	0.0057544	0.0075635	0.0047241
			32.9	0.00012695	0.00013062	0.00012573			32.9	0.0136108	0.0108276	0.0133301			32.9	0.0652504	0.000342	-7.3242e-06			32.9	0.112006	0.00539551	-1.3428e-05			32.9	3.418e-05	6.1035e-05				32.9	0.0004895	0.00053955	0.0106567	0.00869141			32.9	0.682471	0.693164	0.763471			32.9	0.0057263	0.0075647	0.004729
			33	0.00012573	0.00013184	0.00012451			33	0.0136963	0.0107544	0.0132568			33	0.0652504	0.000342	-8.5449e-06			33	0.104538	0.00535889	-1.2207e-05			33	3.418e-05	6.1035e-05				33	0.00048828	0.00054077	0.0106567	0.00875244			33	0.696824	0.672486	0.763471			33	0.0057202	0.0075635	0.004718
			33.1	0.00012573	0.00013062	0.00012573			33.1	0.0137085	0.0107666	0.0133667			33.1	0.0652504	0.000341	-8.5449e-06			33.1	0.112006	0.00543213	-1.3428e-05			33.1	3.2959e-05	6.3477e-05				33.1	0.00048828	0.00054077	0.0107178	0.00880127			33.1	0.689647	0.686271	0.756294			33.1	0.0057556	0.0075391	0.0047168
			33.2	0.00012573	0.00012939	0.00012695			33.2	0.0137207	0.0108154	0.0133301			33.2	0.0559712	0.000341	-7.3242e-06			33.2	0.104538	0.00544434	-1.3428e-05			33.2	3.418e-05	6.2256e-05				33.2	0.00048828	0.00054199	0.0107422	0.00880127			33.2	0.689647	0.686271	0.763471			33.2	0.0058264	0.007594	0.0046997
			33.3	0.00012573	0.00013062	0.00012695			33.3	0.0137451	0.0108276	0.0132813			33.3	0.0652504	0.000342	-7.3242e-06			33.3	0.112006	0.00543213	-1.2207e-05			33.3	3.418e-05	6.1035e-05				33.3	0.00049072	0.00054077	0.0107544	0.00876465			33.3	0.704	0.693164	0.763471			33.3	0.005896	0.0075842	0.0047009
			33.4	0.00012817	0.00012939	0.00012451			33.4	0.0137573	0.0108521	0.0132935			33.4	0.0652504	0.000342	-7.3242e-06			33.4	0.104538	0.00540771	-1.2207e-05			33.4	3.54e-05	6.2256e-05				33.4	0.00049072	0.00054077	0.0107788	0.00877686			33.4	0.689647	0.700056	0.770706			33.4	0.0059839	0.0075806	0.0047009
			33.5	0.00012817	0.00013062	0.00012451			33.5	0.0137207	0.0108398	0.013269			33.5	0.0559712	0.000341	-7.3242e-06			33.5	0.0970765	0.0053833	-1.2207e-05			33.5	3.2959e-05	6.2256e-05				33.5	0.00049194	0.00054199	0.0107666	0.00877686			33.5	0.696824	0.693164	0.763471			33.5	0.0060583	0.0075781	0.0047009
			33.6	0.00012695	0.00013062	0.00012573			33.6	0.0137085	0.0108398	0.0132446			33.6	0.0559712	0.000341	-7.3242e-06			33.6	0.104538	0.00529785	-1.2207e-05			33.6	3.54e-05	6.1035e-05				33.6	0.00049438	0.00054199	0.0107422	0.00882568			33.6	0.696824	0.700056	0.756294			33.6	0.0061206	0.0075854	0.0046985
			33.7	0.00012695	0.00013062	0.00012573			33.7	0.0137695	0.0108521	0.0133423			33.7	0.0559712	0.000341	-7.3242e-06			33.7	0.104538	0.00539551	-1.3428e-05			33.7	3.418e-05	6.1035e-05				33.7	0.00049561	0.00054321	0.01073	0.00891113			33.7	0.696824	0.700056	0.763471			33.7	0.006167	0.0075659	0.0046851
			33.8	0.00012817	0.00013062	0.00012695			33.8	0.0137329	0.0108398	0.0134766			33.8	0.0559712	0.000343	-7.3242e-06			33.8	0.112006	0.00540771	-1.2207e-05			33.8	3.418e-05	6.2256e-05				33.8	0.00049438	0.00054321	0.0107056	0.00893555			33.8	0.696824	0.706949	0.777882			33.8	0.0061865	0.0075354	0.0046826
			33.9	0.00012695	0.00013184	0.00012573			33.9	0.0137329	0.0107788	0.0135132			33.9	0.0559712	0.000343	-8.5449e-06			33.9	0.112006	0.00541992	-1.2207e-05			33.9	3.54e-05	6.4697e-05				33.9	0.00049438	0.00054321	0.0106812	0.00899658			33.9	0.696824	0.700056	0.756294			33.9	0.006178	0.0075464	0.0046655
			34	0.00012695	0.00013062	0.00012451			34	0.0137085	0.0109131	0.0134644			34	0.0559712	0.000341	-6.1035e-06			34	0.112006	0.00540771	-1.3428e-05			34	3.2959e-05	6.2256e-05				34	0.00049438	0.00054443	0.0106812	0.00908203			34	0.696824	0.700056	0.763471			34	0.0062146	0.0075415	0.0046887
			34.1	0.00012695	0.00013062	0.00012695			34.1	0.0137573	0.0108154	0.0134766			34.1	0.0559712	0.000341	-6.1035e-06			34.1	0.104538	0.00539551	-1.2207e-05			34.1	3.54e-05	6.2256e-05				34.1	0.00049438	0.00054321	0.0107178	0.00915527			34.1	0.696824	0.700056	0.770706			34.1	0.0062341	0.0075476	0.0046875
			34.2	0.00012695	0.00013062	0.00012817			34.2	0.0137329	0.0108154	0.0134766			34.2	0.0559712	0.000342	-7.3242e-06			34.2	0.112006	0.00544434	-1.2207e-05			34.2	3.418e-05	6.2256e-05				34.2	0.00049561	0.00054321	0.01073	0.00917969			34.2	0.704	0.706949	0.770706			34.2	0.0062683	0.0075439	0.0046875
			34.3	0.00012695	0.00013062	0.00012573			34.3	0.0138062	0.0108398	0.0135132			34.3	0.0652504	0.000341	-7.3242e-06			34.3	0.104538	0.00543213	-1.2207e-05			34.3	3.418e-05	6.2256e-05				34.3	0.00049438	0.00054321	0.0107178	0.00927734			34.3	0.711176	0.706949	0.777882			34.3	0.0063013	0.0075415	0.0046765
			34.4	0.00012695	0.00013184	0.00012573			34.4	0.0137817	0.0108276	0.0134521			34.4	0.0652504	0.000342	-7.3242e-06			34.4	0.104538	0.00543213	-1.3428e-05			34.4	3.418e-05	6.2256e-05				34.4	0.00049561	0.00054199	0.0107178	0.00931396			34.4	0.704	0.706949	0.763471			34.4	0.006322	0.0075281	0.0046667
			34.5	0.00012573	0.00013184	0.00012573			34.5	0.0137329	0.0108276	0.0134888			34.5	0.0559712	0.000341	-7.3242e-06			34.5	0.104538	0.00537109	-1.2207e-05			34.5	3.54e-05	6.2256e-05				34.5	0.00049561	0.00054077	0.0107056	0.00938721			34.5	0.711176	0.700056	0.770706			34.5	0.0063293	0.0075598	0.0046521
			34.6	0.00012695	0.00013062	0.00012573			34.6	0.0137329	0.0108521	0.0134888			34.6	0.0559712	0.000342	-7.3242e-06			34.6	0.112006	0.00541992	-1.2207e-05			34.6	3.54e-05	6.2256e-05				34.6	0.00049561	0.00054199	0.0107056	0.00946045			34.6	0.704	0.713842	0.777882			34.6	0.006344	0.0075928	0.0046704
			34.7	0.00012695	0.00013062	0.00012573			34.7	0.0137573	0.0109009	0.0134888			34.7	0.0559712	0.000341	-7.3242e-06			34.7	0.112006	0.00543213	-1.3428e-05			34.7	3.54e-05	6.2256e-05				34.7	0.00049438	0.00054077	0.0106934	0.00947266			34.7	0.711176	0.713842	0.777882			34.7	0.0063855	0.0076025	0.0046753
			34.8	0.00012695	0.00013184	0.00012695			34.8	0.0136841	0.0108521	0.0135254			34.8	0.0559712	0.000342	-8.5449e-06			34.8	0.104538	0.0053833	-1.2207e-05			34.8	3.418e-05	6.3477e-05				34.8	0.00049438	0.00054321	0.0106934	0.00946045			34.8	0.711176	0.713842	0.770706			34.8	0.0064014	0.0076221	0.0046704
			34.9	0.00012695	0.00013062	0.00012573			34.9	0.0137695	0.0108154	0.013562			34.9	0.0559712	0.000342	-7.3242e-06			34.9	0.112006	0.00534668	-1.3428e-05			34.9	3.418e-05	6.3477e-05				34.9	0.00049316	0.00054321	0.0107178	0.00944824			34.9	0.718353	0.713842	0.777882			34.9	0.006427	0.0076074	0.0046802
			35	0.00012573	0.00013062	0.00012573			35	0.0137451	0.0108398	0.0135864			35	0.0374507	0.000341	-7.3242e-06			35	0.112006	0.00533447	-1.2207e-05			35	3.54e-05	6.1035e-05				35	0.00049561	0.00054321	0.01073	0.00946045			35	0.704	0.713842	0.785059			35	0.0064783	0.0075891	0.0046741
			35.1	0.00012573	0.00013062	0.00012573			35.1	0.0137817	0.0108398	0.0135742			35.1	0.0467071	0.000341	-7.3242e-06			35.1	0.104538	0.00535889	-1.3428e-05			35.1	3.418e-05	6.3477e-05				35.1	0.00049438	0.00054443		0.00946045			35.1	0.711176	0.713842	0.777882			35.1	0.0065552	0.0076245	0.0046667
			35.2	0.00012817	0.00013184	0.00012695			35.2	0.0138184	0.0108643	0.0135864			35.2	0.0652504	0.000342	-8.5449e-06			35.2	0.112006	0.00539551	-1.0986e-05			35.2	3.54e-05	6.3477e-05				35.2	0.00049438	0.00054321		0.00947266			35.2	0.711176	0.706949	0.777882			35.2	0.0065894	0.0076428	0.0046619
			35.3	0.00012695	0.00013184	0.00012573			35.3	0.0137695	0.0108032	0.013562			35.3	0.0559712	0.000342	-7.3242e-06			35.3	0.112006	0.00535889	-1.3428e-05			35.3	3.54e-05	6.2256e-05				35.3	0.00049438	0.00054565		0.0095459			35.3	0.711176	0.713842	0.785059			35.3	0.0066479	0.0076245	0.0046802
			35.4	0.00012695	0.00013184	0.00012573			35.4	0.0137329	0.010791	0.0135742			35.4	0.0467071	0.000342	-8.5449e-06			35.4	0.104538	0.00545654	-1.3428e-05			35.4	3.54e-05	6.2256e-05				35.4	0.00049561	0.00054688		0.00957031			35.4	0.718353	0.727627	0.777882			35.4	0.0066919	0.0075977	0.0046777
			35.5	0.00012817	0.00013062	0.00012573			35.5	0.0137939	0.0108032	0.0136108			35.5	0.0559712	0.000343	-6.1035e-06			35.5	0.104538	0.00545654	-1.0986e-05			35.5	3.54e-05	6.3477e-05				35.5	0.00049561	0.0005481		0.00961914			35.5	0.725529	0.713842	0.785059			35.5	0.0067261	0.0076184	0.0046777
			35.6	0.00012695	0.00013062	0.00012695			35.6	0.0138306	0.0108276	0.0136475			35.6	0.0559712	0.000342	-7.3242e-06			35.6	0.112006	0.00545654	-1.2207e-05			35.6	3.418e-05	6.3477e-05				35.6	0.00049683	0.0005481		0.00963135			35.6	0.725529	0.713842	0.777882			35.6	0.0067529	0.0076123	0.0046887
			35.7	0.00012573	0.00013184	0.00012695			35.7	0.0138794	0.0108154	0.0135742			35.7	0.0467071	0.000342	-6.1035e-06			35.7	0.104538	0.00549316	-1.2207e-05			35.7	3.418e-05	6.2256e-05				35.7	0.00049683	0.00054932		0.00970459			35.7	0.725529	0.713842	0.777882			35.7	0.0067493	0.0076318	0.0046826
			35.8	0.00012573	0.00013062	0.00012695			35.8	0.0138672	0.0108276	0.0135864			35.8	0.0467071	0.000341	-6.1035e-06			35.8	0.112006	0.00545654	-1.2207e-05			35.8	3.54e-05	6.2256e-05				35.8	0.00049683	0.0005481		0.00975342			35.8	0.718353	0.720734	0.777882			35.8	0.0067017	0.0076379	0.0046667
			35.9	0.00012695	0.00013062	0.00012695			35.9	0.013855	0.0108887	0.0135254			35.9	0.0467071	0.000342	-7.3242e-06			35.9	0.104538	0.00533447	-1.2207e-05			35.9	3.54e-05	6.2256e-05				35.9	0.00049805	0.00054932		0.00979004			35.9	0.711176	0.706949	0.785059			35.9	0.0066602	0.007627	0.0046765
			36	0.00012695	0.00013184	0.00012695			36	0.0138184	0.0109253	0.0135742			36	0.0467071	0.000343	-6.1035e-06			36	0.112006	0.00540771	-1.0986e-05			36	3.54e-05	6.3477e-05				36	0.00050049	0.00055054		0.00975342			36	0.718353	0.713842	0.785059			36	0.0066406	0.0076343	0.0046826
			36.1	0.00012817	0.00013184	0.00012573			36.1	0.013855	0.0109253	0.0135376			36.1	0.0559712	0.000342	-7.3242e-06			36.1	0.104538	0.00541992	-1.3428e-05			36.1	3.54e-05	6.3477e-05				36.1	0.00050049	0.00055176		0.00987549			36.1	0.711176	0.720734	0.785059			36.1	0.0066516	0.007627	0.0046765
			36.2	0.00012817	0.00013184	0.00012573			36.2	0.0138428	0.0109497	0.0135254			36.2	0.0559712	0.000342	-7.3242e-06			36.2	0.104538	0.00531006	-1.0986e-05			36.2	3.418e-05	6.2256e-05				36.2	0.00050293	0.00055054		0.00985107			36.2	0.725529	0.700056	0.792235			36.2	0.0066602	0.0076172	0.0046802
			36.3	0.00012695	0.00013184	0.00012817			36.3	0.0138672	0.0109863	0.0135498			36.3	0.0467071	0.000342	-6.1035e-06			36.3	0.112006	0.00529785	-1.2207e-05			36.3	3.6621e-05	6.2256e-05				36.3	0.00050537	0.00055054		0.00980225			36.3	0.725529	0.727627	0.785059			36.3	0.006665	0.007644	0.0047021
			36.4	0.00012695	0.00013184	0.00012573			36.4	0.013855	0.0109131	0.0135986			36.4	0.0467071	0.000342	-6.1035e-06			36.4	0.112006	0.00535889	-1.0986e-05			36.4	3.6621e-05	6.3477e-05				36.4	0.00050415	0.00055176		0.00977783			36.4	0.725529	0.720734	0.806588			36.4	0.0066516	0.0076501	0.0046887
			36.5	0.00012817	0.00013184	0.00012695			36.5	0.013855	0.0109497	0.013501			36.5	0.0467071	0.000342	-9.7656e-06			36.5	0.112006	0.00543213	-1.2207e-05			36.5	3.54e-05	6.3477e-05				36.5	0.00050537	0.00055176		0.00974121			36.5	0.732706	0.713842	0.792235			36.5	0.0066589		0.0046802
			36.6	0.00012695	0.00013184	0.00012573			36.6	0.0137817	0.0109619	0.013562			36.6	0.0559712	0.000341	-7.3242e-06			36.6	0.112006	0.00543213	-1.3428e-05			36.6	3.54e-05	6.3477e-05				36.6	0.00050415	0.00054932		0.00970459			36.6	0.725529	0.727627	0.792235			36.6	0.006676		0.0046875
			36.7	0.00012695	0.00013062	0.00012695			36.7	0.0138184	0.0109497	0.0134766			36.7	0.0559712	0.000342	-7.3242e-06			36.7	0.104538	0.00544434	-1.3428e-05			36.7	3.54e-05	6.2256e-05				36.7	0.00050293	0.00055054		0.00969238			36.7	0.725529	0.713842	0.806588			36.7	0.0066687		0.0046899
			36.8	0.00012695	0.00013062	0.00012695			36.8	0.0137573	0.0109497	0.013562			36.8	0.0467071	0.000342	-7.3242e-06			36.8	0.112006	0.00545654	-1.0986e-05			36.8	3.6621e-05	6.2256e-05				36.8	0.00050415	0.00054932		0.00968018			36.8	0.732706	0.73452	0.799412			36.8	0.0066541		0.0046912
			36.9	0.00012817	0.00013062	0.00012695			36.9	0.0137695	0.0109863	0.0135498			36.9	0.0559712	0.000342	-7.3242e-06			36.9	0.112006	0.00546875	-1.0986e-05			36.9	3.6621e-05	6.2256e-05				36.9	0.00050659	0.0005481		0.00966797			36.9	0.725529	0.741412	0.799412			36.9	0.0066357		0.0046912
			37	0.00012695	0.00013184	0.00012573			37	0.0138916	0.0109619	0.0135742			37	0.0559712	0.000341	-8.5449e-06			37	0.104538	0.00545654	-1.2207e-05			37	3.6621e-05	6.3477e-05				37	0.00050537	0.00054932		0.00969238			37	0.732706	0.720734	0.799412			37	0.0066406		0.0046741
			37.1	0.00012817	0.00013184	0.00012573			37.1	0.0139648	0.0109985	0.0136353			37.1	0.0467071	0.000342	-8.5449e-06			37.1	0.112006	0.00543213	-1.2207e-05			37.1	3.6621e-05	6.3477e-05				37.1	0.00050537	0.0005481		0.0097168			37.1	0.725529	0.706949	0.799412			37.1	0.0066272		0.0046704
			37.2	0.00012817	0.00013062	0.00012695			37.2	0.0139526	0.0109741	0.0136841			37.2	0.0374507	0.000342	-7.3242e-06			37.2	0.112006	0.00544434	-1.0986e-05			37.2	3.54e-05	6.2256e-05				37.2	0.00050415	0.00054688		0.009729			37.2	0.725529	0.73452	0.792235			37.2	0.0066504		0.0046851
			37.3	0.00012817	0.00013184	0.00012695			37.3	0.0139526	0.0109863	0.0136475			37.3	0.0467071	0.000342	-8.5449e-06			37.3	0.112006	0.00545654	-1.2207e-05			37.3	3.6621e-05	6.3477e-05				37.3	0.00050415	0.0005481		0.0097168			37.3	0.732706	0.727627	0.806588			37.3	0.0066418		0.004679
			37.4	0.00012695	0.00013184	0.00012695			37.4	0.0139526	0.0109863	0.0137207			37.4	0.0559712	0.000343	-8.5449e-06			37.4	0.104538	0.00543213	-1.2207e-05			37.4	3.54e-05	6.3477e-05				37.4	0.00050293	0.00054565		0.00970459			37.4	0.732706	0.73452	0.806588			37.4	0.0066321		0.0046826
			37.5	0.00012817	0.00013184	0.00012573			37.5	0.0139404	0.0109863	0.0137207			37.5	0.0559712	0.000342	-6.1035e-06			37.5	0.112006	0.00545654	-1.2207e-05			37.5	3.54e-05	6.4697e-05				37.5	0.00050537	0.00054688		0.00969238			37.5	0.725529	0.727627	0.799412			37.5	0.0066321		0.0046802
			37.6	0.00012695	0.00013184	0.00012573			37.6	0.0139282	0.0109375	0.0136719			37.6	0.0467071	0.000342	-8.5449e-06			37.6	0.112006	0.00543213	-1.2207e-05			37.6	3.6621e-05	6.2256e-05				37.6	0.00050537	0.00054565		0.00974121			37.6	0.725529	0.727627	0.799412			37.6	0.0066345		0.0046765
			37.7	0.00012695	0.00013184	0.00012695			37.7	0.013916	0.0109863	0.0136841			37.7	0.0559712	0.000343	-7.3242e-06			37.7	0.104538	0.00540771	-1.2207e-05			37.7	3.7842e-05	6.2256e-05				37.7	0.00050415	0.0005481		0.00977783			37.7	0.725529	0.713842	0.813765			37.7	0.006615		0.0046643
			37.8	0.00012695	0.00013184	0.00012695			37.8	0.0139526	0.0109497	0.0136963			37.8	0.0559712	0.000343	-7.3242e-06			37.8	0.112006	0.00537109	-1.3428e-05			37.8	3.6621e-05	6.3477e-05				37.8	0.00050171	0.00054688		0.00980225			37.8	0.732706	0.727627	0.806588			37.8	0.0066125		0.0046729
			37.9	0.00012817	0.00013306	0.00012573			37.9	0.013916	0.0109741	0.0136719			37.9	0.0652504	0.000341	-7.3242e-06			37.9	0.104538	0.00544434	-1.0986e-05			37.9	3.54e-05	6.3477e-05				37.9	0.00050293	0.00054688		0.00981445			37.9	0.732706	0.727627	0.799412			37.9	0.0066211		0.0046667
			38	0.00012695	0.00013184	0.00012695			38	0.0139404	0.0109741	0.0137573			38	0.0559712	0.000342	-7.3242e-06			38	0.112006	0.00540771	-1.2207e-05			38	3.54e-05	6.3477e-05				38	0.00050293	0.00054688		0.00983887			38	0.725529	0.720734	0.806588			38	0.0066211		0.0046655
			38.1	0.00012573	0.00013184	0.00012817			38.1	0.0138916	0.0109985	0.0137573			38.1	0.0559712	0.000343	-7.3242e-06			38.1	0.104538	0.00543213	-1.2207e-05			38.1	3.6621e-05	6.2256e-05				38.1	0.00050293	0.00054565		0.00985107			38.1	0.739941	0.73452	0.806588			38.1	0.0066174
			38.2	0.00012695	0.00013062	0.00012817			38.2	0.0138794	0.0109619	0.0137695			38.2	0.0559712	0.000342	-7.3242e-06			38.2	0.119474	0.00541992	-1.2207e-05			38.2	3.7842e-05	6.3477e-05				38.2	0.00050293	0.00054688		0.00985107			38.2	0.732706	0.727627	0.813765			38.2	0.0066187
			38.3	0.00012939	0.00013184	0.00012573			38.3	0.0139282	0.0110107	0.0137329			38.3	0.0559712	0.000343	-8.5449e-06			38.3	0.104538	0.00543213	-1.2207e-05			38.3	3.54e-05	6.4697e-05				38.3	0.00050293	0.00054688		0.00985107			38.3	0.732706	0.720734	0.799412			38.3	0.0066138
			38.4	0.00012939	0.00013184	0.00012817			38.4	0.013916	0.0109985	0.0137939			38.4	0.0559712	0.000342	-8.5449e-06			38.4	0.104538	0.00540771	-1.2207e-05			38.4	3.54e-05	6.2256e-05				38.4	0.00050415	0.00054565		0.00991211			38.4	0.739941	0.727627	0.806588			38.4	0.0065894
			38.5	0.00013062	0.00013184	0.00012695			38.5	0.013916	0.0110229	0.0138062			38.5	0.0467071	0.000342	-7.3242e-06			38.5	0.119474	0.0053833	-1.2207e-05			38.5	3.6621e-05	6.3477e-05				38.5	0.00050293	0.00054565		0.0098877			38.5	0.732706	0.73452	0.813765			38.5	0.0066162
			38.6	0.00013184	0.00013062	0.00012817			38.6	0.0139771	0.0110474	0.0137817			38.6	0.0467071	0.000343	-7.3242e-06			38.6	0.112006	0.00550537	-1.0986e-05			38.6	3.6621e-05	6.4697e-05				38.6	0.00050293	0.00054565		0.0098999			38.6	0.739941	0.73452	0.813765			38.6	0.0066199
			38.7	0.00013306	0.00013428	0.00012695			38.7	0.0139771	0.0110596	0.0138672			38.7	0.0559712	0.000342	-8.5449e-06			38.7	0.112006	0.00548096	-1.2207e-05			38.7	3.54e-05	6.4697e-05				38.7	0.00050293	0.00054565		0.00991211			38.7	0.739941	0.73452	0.799412			38.7	0.0066223
			38.8	0.00013428	0.00013306	0.00012817			38.8	0.0139648	0.0110474	0.0138672			38.8	0.0559712	0.000342	-8.5449e-06			38.8	0.112006	0.00544434	-1.0986e-05			38.8	3.54e-05	6.3477e-05				38.8	0.00050049	0.00054565		0.00992432			38.8	0.739941	0.73452	0.799412			38.8	0.0066199
			38.9	0.00013428	0.00013306	0.00012573			38.9	0.0139526	0.0110474	0.0138306			38.9	0.0467071	0.000342	-7.3242e-06			38.9	0.112006	0.00545654	-1.2207e-05			38.9	3.54e-05	6.3477e-05				38.9	0.00050293	0.00054565		0.00987549			38.9	0.747118	0.73452	0.806588			38.9	0.006615
			39	0.0001355	0.00013184	0.00012695			39	0.0139526	0.0110596	0.0138062			39	0.0467071	0.000342	-7.3242e-06			39	0.119474	0.00550537	-1.0986e-05			39	3.7842e-05	6.3477e-05				39	0.00050415	0.00054565		0.00986328			39	0.754294	0.748362	0.806588			39	0.0065796
			39.1	0.00013672	0.00013184	0.00012817			39.1	0.0139404	0.0110474	0.0138062			39.1	0.0467071	0.000342	-8.5449e-06			39.1	0.104538	0.00561523	-1.2207e-05			39.1	3.6621e-05	6.2256e-05				39.1	0.00050293	0.00054688		0.00981445			39.1	0.747118	0.741412	0.813765			39.1	0.0065894
			39.2	0.00013794	0.00013306	0.00012817			39.2	0.0139771	0.0110718	0.0138794			39.2	0.0559712	0.000342	-8.5449e-06			39.2	0.119474	0.0057251	-1.0986e-05			39.2	3.54e-05	6.4697e-05				39.2	0.00050171	0.00054688		0.00982666			39.2	0.747118	0.741412	0.806588			39.2	0.0065857
			39.3	0.00013916	0.00013184	0.00012573			39.3	0.0139526	0.0110718	0.0139526			39.3	0.0559712	0.000343	-8.5449e-06			39.3	0.112006	0.00593262	-1.2207e-05			39.3	3.6621e-05	6.3477e-05				39.3	0.00050415	0.0005481		0.00982666			39.3	0.747118	0.748362	0.799412			39.3	0.0065942
			39.4	0.0001416	0.00013184	0.00012817			39.4	0.0139404	0.0110229	0.013916			39.4	0.0559712	0.000343	-6.1035e-06			39.4	0.119474	0.00611572	-1.2207e-05			39.4	3.6621e-05	6.3477e-05				39.4	0.00050537	0.0005481		0.00983887			39.4	0.739941	0.727627	0.799412			39.4	0.006582
			39.5	0.00014893	0.00013184	0.00012817			39.5	0.0139771	0.0110718	0.0138672			39.5	0.0559712	0.000342	-8.5449e-06			39.5	0.112006	0.00621338	-1.0986e-05			39.5	3.7842e-05	6.3477e-05				39.5	0.00050415	0.0005481		0.00982666			39.5	0.747118	0.73452	0.813765			39.5	0.0065784
			39.6	0.00015869	0.00013306	0.00012695			39.6	0.0139404	0.0111206	0.0138916			39.6	0.0559712	0.000342	-8.5449e-06			39.6	0.104538	0.00637207	-1.0986e-05			39.6	3.6621e-05	6.2256e-05				39.6	0.00050293	0.0005481		0.00982666			39.6	0.739941	0.73452	0.806588			39.6	0.0065735
			39.7	0.00016479	0.00013428	0.00012695			39.7	0.0138916	0.0111084	0.0139282			39.7	0.0559712	0.000342	-8.5449e-06			39.7	0.104538	0.00657959	-1.0986e-05			39.7	3.6621e-05	6.3477e-05				39.7	0.00050415	0.00054688		0.00982666			39.7	0.754294	0.727627	0.813765			39.7	0.0065747
			39.8	0.00016968	0.00013306	0.00012695			39.8	0.0139648	0.0111084	0.0137939			39.8	0.0559712	0.000342	-7.3242e-06			39.8	0.119474	0.00661621	-9.7656e-06			39.8	3.6621e-05	6.4697e-05				39.8	0.00050537	0.00054688		0.00976563			39.8	0.754294	0.73452	0.806588			39.8	0.0065845
			39.9	0.00017334	0.00013306	0.00012695			39.9	0.0139038	0.0111206	0.013916			39.9	0.0467071	0.000342	-7.3242e-06			39.9	0.119474	0.00675049	-9.7656e-06			39.9	3.7842e-05	6.2256e-05				39.9	0.00050537	0.00054688		0.00980225			39.9	0.732706	0.73452	0.820941			39.9	0.0065869
			40	0.00017578	0.00013306	0.00012695			40	0.013916	0.0110962	0.0139404			40	0.0652504	0.000343	-8.5449e-06			40	0.112006	0.00692139	-1.0986e-05			40	3.7842e-05	6.3477e-05				40	0.00050415	0.00054565		0.00981445			40	0.754294	0.727627	0.813765			40	0.0065808
			40.1	0.00017578	0.00013428	0.00012695			40.1	0.0140381	0.011084	0.0139038			40.1	0.0559712	0.000342	-7.3242e-06			40.1	0.112006	0.00709229	-1.0986e-05			40.1	3.6621e-05	6.3477e-05				40.1	0.00050537	0.00054565		0.00982666			40.1	0.747118	0.73452	0.806588			40.1	0.0065833
			40.2	0.00017456	0.00013306	0.00012695			40.2	0.0140625	0.0111572	0.013916			40.2	0.0559712	0.000341	-7.3242e-06			40.2	0.119474	0.00720215	-1.2207e-05			40.2	3.6621e-05	6.2256e-05				40.2	0.00050415	0.00054565		0.00983887			40.2	0.747118	0.741412	0.806588			40.2	0.0065808
			40.3	0.00016968	0.00013306	0.00012817			40.3	0.0140015	0.011145	0.0139526			40.3	0.0559712	0.000343	-7.3242e-06			40.3	0.112006	0.00727539	-1.0986e-05			40.3	3.7842e-05	6.4697e-05				40.3	0.00050415	0.00054565		0.00985107			40.3	0.754294	0.741412	0.820941			40.3	0.0065515
			40.4	0.00016724	0.00013306	0.00012695			40.4	0.0140869	0.0111572	0.0139282			40.4	0.0559712	0.000341	-7.3242e-06			40.4	0.112006	0.00726318	-9.7656e-06			40.4	3.6621e-05	6.3477e-05				40.4	0.00050293	0.00054688		0.00983887			40.4	0.754294	0.73452	0.813765			40.4	0.0065723
			40.5	0.00016602	0.00013184	0.00012817			40.5	0.0140747	0.0111938	0.0139526			40.5	0.0559712	0.000341	-8.5449e-06			40.5	0.112006	0.00722656	-1.0986e-05			40.5	3.6621e-05	6.3477e-05				40.5	0.00050171	0.00054688		0.00985107			40.5	0.754294	0.748362	0.806588			40.5	0.0065833
			40.6	0.00016724	0.00013428	0.00012817			40.6	0.0140747	0.0111206	0.0139771			40.6	0.0652504	0.000341	-7.3242e-06			40.6	0.112006	0.00720215	-1.0986e-05			40.6	3.7842e-05	6.3477e-05				40.6	0.00050415	0.00054688		0.00985107			40.6	0.747118	0.741412	0.806588			40.6	0.0065881
			40.7	0.00016968	0.00013306	0.00012695			40.7	0.0140259	0.0110596	0.0139038			40.7	0.0652504	0.000341	-7.3242e-06			40.7	0.112006	0.00733643	-1.0986e-05			40.7	3.6621e-05	6.3477e-05				40.7	0.00050415	0.00054688		0.00981445			40.7	0.761471	0.741412	0.820941			40.7	0.0065955
			40.8	0.00017334	0.00013306	0.00012939			40.8	0.0140503	0.0111084	0.0138916			40.8	0.0652504	0.000343	-7.3242e-06			40.8	0.104538	0.00748291	-1.0986e-05			40.8	3.9063e-05	6.3477e-05				40.8	0.00050415	0.0005481		0.00980225			40.8	0.754294	0.748362	0.813765			40.8	0.0065833
			40.9	0.000177	0.00013306	0.00012939			40.9	0.0140503	0.0110596	0.0139404			40.9	0.0652504	0.000342	-7.3242e-06			40.9	0.119474	0.00772705	-9.7656e-06			40.9	3.9063e-05	6.4697e-05				40.9	0.00050293	0.00054688		0.00981445			40.9	0.754294	0.741412	0.813765			40.9	0.0065649
			41	0.00017822	0.00013306	0.00012817			41	0.0140991	0.0110596	0.0138794			41	0.0559712	0.000341	-7.3242e-06			41	0.112006	0.00794678	-1.0986e-05			41	3.7842e-05	6.3477e-05				41	0.00050293	0.00054688		0.00980225			41	0.761471	0.73452	0.799412			41	0.006571
			41.1	0.00017944	0.00013306	0.00012817			41.1	0.0140869	0.0111328	0.0139282			41.1	0.0467071	0.000343	-7.3242e-06			41.1	0.112006	0.0081543	-1.0986e-05			41.1	3.7842e-05	6.4697e-05				41.1	0.00050293	0.0005481		0.00983887			41.1	0.754294	0.741412	0.813765			41.1	0.006582
			41.2	0.00018066	0.00013306	0.00012817			41.2	0.0140747	0.0111938	0.013916			41.2	0.0559712	0.000343	-7.3242e-06			41.2	0.112006	0.00841064	-1.0986e-05			41.2	3.7842e-05	6.3477e-05				41.2	0.00050293	0.0005481		0.00982666			41.2	0.747118	0.741412	0.806588			41.2	0.0065723
			41.3	0.00018188	0.00013184	0.00012939			41.3	0.0140381	0.0111816	0.0139526			41.3	0.0467071	0.000344	-6.1035e-06			41.3	0.112006	0.00860596	-9.7656e-06			41.3	3.6621e-05	6.4697e-05				41.3	0.00050415	0.0005481		0.00983887			41.3	0.747118	0.741412	0.806588			41.3	0.0065649
			41.4	0.00018188	0.00013306	0.00012817			41.4	0.0140015	0.0112671	0.0139526			41.4	0.0467071	0.000342	-8.5449e-06			41.4	0.112006	0.00871582	-1.0986e-05			41.4	3.7842e-05	6.5918e-05				41.4	0.00050293	0.00054932		0.00983887			41.4	0.754294	0.741412	0.813765			41.4	0.0065735
			41.5	0.00018066	0.00013306	0.00012817			41.5	0.0139526	0.0112427	0.0139282			41.5	0.0559712	0.000343	-8.5449e-06			41.5	0.112006	0.00887451	-1.0986e-05			41.5	3.7842e-05	6.4697e-05				41.5	0.00050293	0.0005481		0.00983887			41.5	0.754294	0.741412	0.813765			41.5	0.0065649
			41.6	0.00018311	0.00013306	0.00012817			41.6	0.0139893	0.0112549	0.0139038			41.6	0.0559712	0.000343	-6.1035e-06			41.6	0.119474	0.009021	-1.0986e-05			41.6	3.7842e-05	6.3477e-05				41.6	0.00050537	0.0005481		0.00981445			41.6	0.747118	0.748362	0.813765			41.6	0.0065588
			41.7	0.00018433	0.00013306	0.00012939			41.7	0.0140503	0.0113159	0.0139893			41.7	0.0652504	0.000342	-7.3242e-06			41.7	0.112006	0.00914307	-9.7656e-06			41.7	3.7842e-05	6.3477e-05				41.7	0.00050293	0.0005481		0.00983887			41.7	0.754294	0.748362	0.813765			41.7	0.006582
			41.8	0.00018555	0.00013184	0.00012817			41.8	0.0140869	0.0113403	0.0139893			41.8	0.0559712	0.000342	-8.5449e-06			41.8	0.119474	0.0092041	-1.0986e-05			41.8	3.6621e-05	6.4697e-05				41.8	0.00050537	0.0005481		0.00986328			41.8	0.754294	0.748362	0.813765			41.8	0.0065869
			41.9	0.00018677	0.00013306	0.00012817			41.9	0.0141724	0.0113159	0.0139404			41.9	0.0652504	0.000342	-8.5449e-06			41.9	0.112006	0.00927734	-1.2207e-05			41.9	3.6621e-05	6.4697e-05				41.9	0.00050537	0.00054932		0.00981445			41.9	0.754294	0.741412	0.820941			41.9	0.0065674
			42	0.00018921	0.00013306	0.00012695			42	0.0141846	0.0113403	0.0139404			42	0.0652504	0.000341	-7.3242e-06			42	0.119474	0.00941162	-1.0986e-05			42	3.7842e-05	6.4697e-05				42	0.00050415	0.0005481		0.00983887			42	0.739941	0.741412	0.813765			42	0.0065662
			42.1	0.00019043	0.00013306	0.00012817			42.1	0.0141479	0.0113281	0.0139648			42.1	0.0652504	0.000343	-7.3242e-06			42.1	0.112006	0.00955811	-1.0986e-05			42.1	3.7842e-05	6.4697e-05				42.1	0.00050415	0.0005481		0.00983887			42.1	0.761471	0.755254	0.813765			42.1	0.0065747
			42.2	0.00019409	0.00013306	0.00012939			42.2	0.0141235	0.0113281	0.0139893			42.2	0.0652504	0.000342	-8.5449e-06			42.2	0.119474	0.00963135	-1.0986e-05			42.2	3.7842e-05	6.3477e-05				42.2	0.00050415	0.0005481		0.00982666			42.2	0.754294	0.748362	0.820941			42.2	0.0065417
			42.3	0.00019653	0.00013184	0.00012939			42.3	0.0141235	0.0113281	0.0139648			42.3	0.0745068	0.000342	-8.5449e-06			42.3	0.112006	0.00961914	-1.0986e-05			42.3	3.7842e-05	6.4697e-05				42.3	0.00050415	0.00054688		0.00982666			42.3	0.754294	0.73452	0.813765			42.3	0.0065686
			42.4	0.00019531	0.00013062	0.00012939			42.4	0.0141113	0.0113281	0.0140137			42.4	0.0652504	0.000342	-8.5449e-06			42.4	0.112006	0.00963135	-1.0986e-05			42.4	3.7842e-05	6.5918e-05				42.4	0.00050415	0.00054688		0.00983887			42.4	0.761471	0.762147	0.813765			42.4	0.0065686
			42.5	0.00019287	0.00013306	0.00012939			42.5	0.0141479	0.0112915	0.0139771			42.5	0.0652504	0.000343	-8.5449e-06			42.5	0.119474	0.00950928	-9.7656e-06			42.5	3.7842e-05	6.5918e-05				42.5	0.00050415	0.00054688		0.00983887			42.5	0.754294	0.748362	0.813765			42.5	0.0065698
			42.6	0.00019409	0.00013306	0.00012939			42.6	0.0141479	0.0113037	0.0139526			42.6	0.0652504	0.000343	-8.5449e-06			42.6	0.119474	0.00938721	-1.0986e-05			42.6	3.7842e-05	6.5918e-05				42.6	0.00050537	0.00054932		0.00985107			42.6	0.747118	0.748362	0.813765			42.6	0.0065613
			42.7	0.00019409	0.00013306	0.00013062			42.7	0.0141479	0.0113403	0.0138184			42.7	0.0652504	0.000342	-8.5449e-06			42.7	0.119474	0.00933838	-9.7656e-06			42.7	3.7842e-05	6.5918e-05				42.7	0.00050415	0.00054932		0.00982666			42.7	0.761471	0.748362	0.806588			42.7	0.0065625
			42.8	0.00019531	0.00013428	0.00012817			42.8	0.0141113	0.0113403	0.0139038			42.8	0.0745068	0.000341	-8.5449e-06			42.8	0.126938	0.009375	-1.0986e-05			42.8	3.7842e-05	6.5918e-05				42.8	0.00050537	0.0005481		0.00982666			42.8	0.754294	0.762147	0.806588			42.8	0.0065454
			42.9	0.00019653	0.00013306	0.00013062			42.9	0.0141602	0.0113525	0.0138672			42.9	0.0652504	0.000343	-8.5449e-06			42.9	0.126938	0.009375	-9.7656e-06			42.9	3.7842e-05	6.5918e-05				42.9	0.00050537	0.00054932		0.00982666			42.9	0.754294	0.748362	0.813765			42.9	0.0065515
			43	0.00019653	0.00013184	0.00012939			43	0.0141846	0.0113525	0.0139771			43	0.0559712	0.000342	-7.3242e-06			43	0.119474	0.00939941	-9.7656e-06			43	4.0283e-05	6.5918e-05				43	0.00050659	0.00055054		0.00982666			43	0.761471	0.741412	0.799412			43	0.0065686
			43.1	0.00019653	0.00013306	0.00012939			43.1	0.014209	0.0113525	0.0139648			43.1	0.0652504	0.000343	-9.7656e-06			43.1	0.119474	0.00944824	-9.7656e-06			43.1	3.7842e-05	6.5918e-05				43.1	0.00050537	0.00055054		0.00983887			43.1	0.768647	0.748362	0.806588			43.1	0.0065686
			43.2	0.00019897	0.00013428	0.00012817			43.2	0.0142212	0.0113647	0.0138794			43.2	0.0652504	0.000343	-8.5449e-06			43.2	0.112006	0.0095459	-1.0986e-05			43.2	3.9063e-05	6.5918e-05				43.2	0.00050537	0.00055054		0.00983887			43.2	0.761471	0.748362	0.806588			43.2	0.0065723
			43.3	0.00020142	0.00013306	0.00012817			43.3	0.0142212	0.0114014	0.0138672			43.3	0.0559712	0.000342	-8.5449e-06			43.3	0.119474	0.00968018	-9.7656e-06			43.3	4.0283e-05	6.4697e-05				43.3	0.00050415	0.00054932		0.00985107			43.3	0.754294	0.748362	0.813765			43.3	0.0065576
			43.4	0.0002002	0.00013306	0.00012817			43.4	0.0141602	0.0114014	0.0140137			43.4	0.0559712	0.000342	-8.5449e-06			43.4	0.126938	0.00970459	-9.7656e-06			43.4	3.7842e-05	6.4697e-05				43.4	0.00050537	0.0005481		0.00983887			43.4	0.768647	0.748362	0.820941			43.4	0.0065588
			43.5	0.00020142	0.00013306	0.00012939			43.5	0.0141724	0.011377	0.0140381			43.5	0.0559712	0.000347	-7.3242e-06			43.5	0.119474	0.00979004	-9.7656e-06			43.5	3.7842e-05	6.5918e-05				43.5	0.00050415	0.0005481		0.00985107			43.5	0.768647	0.741412	0.806588			43.5	0.006543
			43.6	0.00020264	0.00013184	0.00013062			43.6	0.0141846	0.0113403	0.0141602			43.6	0.0652504	0.000356	-7.3242e-06			43.6	0.119474	0.00994873	-9.7656e-06			43.6	3.9063e-05	6.5918e-05				43.6	0.00050293	0.00054932		0.00986328			43.6	0.768647	0.748362	0.806588			43.6	0.0065674
			43.7	0.00020264	0.00013306	0.00012939			43.7	0.0141357	0.0113647	0.0140991			43.7	0.0559712	0.000361	-7.3242e-06			43.7	0.119474	0.0101318	-1.0986e-05			43.7	3.7842e-05	6.5918e-05				43.7	0.00050415	0.00054932		0.00986328			43.7	0.754294	0.755254	0.820941			43.7	0.0065625
			43.8	0.00020142	0.00013306	0.00012939			43.8	0.0141602	0.0113403	0.0140869			43.8	0.0559712	0.000363	-8.5449e-06			43.8	0.119474	0.0102417	-1.0986e-05			43.8	3.7842e-05	6.4697e-05				43.8	0.00050537	0.0005481		0.00985107			43.8	0.768647	0.741412	0.813765			43.8	0.0065747
			43.9	0.00020142	0.00013306	0.00013062			43.9	0.0141724	0.011377	0.0140381			43.9	0.0652504	0.000359	-7.3242e-06			43.9	0.126938	0.0102905	-9.7656e-06			43.9	4.0283e-05	6.4697e-05				43.9	0.00050415	0.00054932		0.00985107			43.9	0.768647	0.755254	0.813765			43.9	0.0065735
			44	0.00020142	0.00013306	0.00013062			44	0.0141357	0.0113525	0.0141235			44	0.0652504	0.000355	-7.3242e-06			44	0.119474	0.0103516	-1.0986e-05			44	3.9063e-05	6.5918e-05				44	0.00050415	0.00054932		0.00983887			44	0.775824	0.755254	0.806588			44	0.0065649
			44.1	0.00020264	0.00013306	0.00013062			44.1	0.014209	0.0112915	0.0140381			44.1	0.0652504	0.000354	-8.5449e-06			44.1	0.119474	0.0102173	-1.0986e-05			44.1	3.7842e-05	6.5918e-05				44.1	0.00050537	0.00055054		0.00982666			44.1	0.761471	0.748362	0.813765			44.1	0.0065356
			44.2	0.00020386	0.00013184	0.00013062			44.2	0.0141479	0.0112549	0.0141846			44.2	0.0652504	0.000355	-7.3242e-06			44.2	0.119474	0.0102661	-9.7656e-06			44.2	3.9063e-05	6.5918e-05				44.2	0.00050415	0.00055054		0.00985107			44.2	0.761471	0.755254	0.813765			44.2	0.0065442
			44.3	0.00020264	0.00013306	0.00012939			44.3	0.0141724	0.0113525	0.0141357			44.3	0.0652504	0.000353	-7.3242e-06			44.3	0.126938	0.0102905	-9.7656e-06			44.3	4.0283e-05	6.4697e-05				44.3	0.00050415	0.00054932		0.00985107			44.3	0.768647	0.755254	0.820941			44.3	0.0065369
			44.4	0.00020508	0.00013306	0.00013062			44.4	0.0141602	0.0112305	0.0141479			44.4	0.0652504	0.000352	-8.5449e-06			44.4	0.119474	0.0102905	-9.7656e-06			44.4	3.7842e-05	6.5918e-05				44.4	0.00050537	0.00054932		0.00985107			44.4	0.761471	0.755254	0.813765			44.4	0.0065454
			44.5	0.0002063	0.00013428	0.00013062			44.5	0.0141602	0.011499	0.0141846			44.5	0.0652504	0.00035	-8.5449e-06			44.5	0.119474	0.0102539	-1.0986e-05			44.5	3.9063e-05	6.5918e-05				44.5	0.00050293	0.00054932		0.00985107			44.5	0.761471	0.748362	0.799412			44.5	0.0065479
			44.6	0.00020508	0.00013428	0.00012939			44.6	0.0141479	0.0116821	0.0141724			44.6	0.0559712	0.00035	-8.5449e-06			44.6	0.119474	0.0102905	-9.7656e-06			44.6	3.7842e-05	6.5918e-05				44.6	0.00050537	0.0005481		0.00985107			44.6	0.754294	0.755254	0.813765			44.6	0.0065381
			44.7	0.0002063	0.00013428	0.00012939			44.7	0.0141846	0.0118164	0.0141113			44.7	0.0559712	0.00035	-7.3242e-06			44.7	0.126938	0.0102539	-1.0986e-05			44.7	3.7842e-05	6.7139e-05				44.7	0.00050537	0.0005481		0.00982666			44.7	0.768647	0.762147	0.813765			44.7	0.0065259
			44.8	0.0002063	0.00013428	0.00013062			44.8	0.0141724	0.0118774	0.0141968			44.8	0.0745068	0.00035	-8.5449e-06			44.8	0.119474	0.0102173	-9.7656e-06			44.8	3.9063e-05	6.5918e-05				44.8	0.00050415	0.0005481		0.00985107			44.8	0.761471	0.755254	0.813765			44.8	0.0065295
			44.9	0.0002063	0.00013428	0.00012817			44.9	0.0141235	0.0118896	0.0141602			44.9	0.0652504	0.000349	-8.5449e-06			44.9	0.112006	0.0101685	-9.7656e-06			44.9	3.9063e-05	6.7139e-05				44.9	0.00050537	0.00054932		0.00985107			44.9	0.761471	0.748362	0.799412			44.9	0.0065479
			45	0.0002063	0.0001355	0.00012939			45	0.0141602	0.0118652	0.0141479			45	0.0652504	0.000347	-9.7656e-06			45	0.119474	0.0101196	-9.7656e-06			45	3.9063e-05	6.4697e-05				45	0.00050659	0.00055054		0.00983887			45	0.761471	0.748362	0.806588			45	0.0065393
			45.1	0.00020752	0.00013428	0.00012939			45.1	0.0141846	0.011853	0.0141479			45.1	0.0559712	0.000348	-7.3242e-06			45.1	0.119474	0.0100342	-8.5449e-06			45.1	3.9063e-05	6.4697e-05				45.1	0.00050537	0.00055054		0.00983887			45.1	0.768647	0.755254	0.813765			45.1	0.0065381
			45.2	0.00020752	0.00013306	0.00013062			45.2	0.0141602	0.0118286	0.0141357			45.2	0.0467071	0.000348	-8.5449e-06			45.2	0.119474	0.00994873	-8.5449e-06			45.2	3.9063e-05	6.5918e-05				45.2	0.00050659	0.0005481		0.00982666			45.2	0.768647	0.755254	0.813765			45.2	0.0065295
			45.3	0.00020996	0.00013306	0.00013062			45.3	0.0141968	0.0118164	0.0140991			45.3	0.0559712	0.000348	-8.5449e-06			45.3	0.119474	0.00987549	-9.7656e-06			45.3	3.9063e-05	6.7139e-05				45.3	0.00050537	0.00054688		0.00982666			45.3	0.768647	0.748362	0.813765			45.3	0.0065405
			45.4	0.00020874	0.00013306	0.00012939			45.4	0.014209	0.011853	0.0140991			45.4	0.0559712	0.000345	-7.3242e-06			45.4	0.119474	0.00986328	-1.0986e-05			45.4	3.9063e-05	6.5918e-05				45.4	0.00050659	0.00054932		0.00987549			45.4	0.761471	0.755254	0.806588			45.4	0.0065283
			45.5	0.00020874	0.00013428	0.00013184			45.5	0.0141602	0.011853	0.0140991			45.5	0.0559712	0.000347	-8.5449e-06			45.5	0.126938	0.00991211	-9.7656e-06			45.5	3.9063e-05	6.5918e-05				45.5	0.00050659	0.0005481		0.00992432			45.5	0.761471	0.762147	0.806588			45.5	0.0065527
			45.6	0.00020874	0.00013306	0.00013428			45.6	0.0141113	0.0118164	0.0141846			45.6	0.0467071	0.000348	-8.5449e-06			45.6	0.119474	0.00993652	-8.5449e-06			45.6	3.9063e-05	6.5918e-05				45.6	0.00050659	0.0005481		0.00991211			45.6	0.761471	0.748362	0.820941			45.6	0.0065417
			45.7	0.00020996	0.00013428	0.00014038			45.7	0.0141602	0.011853	0.0142456			45.7	0.0559712	0.000347	-7.3242e-06			45.7	0.126938	0.0098877	-9.7656e-06			45.7	3.9063e-05	6.7139e-05				45.7	0.00050415	0.0005481		0.00991211			45.7	0.761471	0.755254	0.806588			45.7	0.0065527
			45.8	0.00020996	0.00013428	0.00014526			45.8	0.0141968	0.0118896	0.0142334			45.8	0.0652504	0.000347	-8.5449e-06			45.8	0.119474	0.00986328	-8.5449e-06			45.8	4.0283e-05	6.7139e-05				45.8	0.00050415	0.0005481		0.0098877			45.8	0.768647	0.748362	0.813765			45.8	0.006543
			45.9	0.00021118	0.00013428	0.00014893			45.9	0.0141968	0.0119629	0.0142334			45.9	0.0652504	0.000347	-8.5449e-06			45.9	0.126938	0.00986328	-9.7656e-06			45.9	3.7842e-05	6.8359e-05				45.9	0.00050537	0.0005481		0.00987549			45.9	0.761471	0.748362	0.820941			45.9	0.0065491
			46	0.00020996	0.00013306	0.00015381			46	0.0142822	0.0120605	0.0142822			46	0.0652504	0.000348	-7.3242e-06			46	0.126938	0.00987549	-1.0986e-05			46	3.9063e-05	6.7139e-05				46	0.00050537	0.00054688		0.0098877			46	0.775824	0.762147	0.813765			46	0.0065405
			46.1	0.00021118	0.00013306	0.00015869			46.1	0.0142822	0.0121582	0.0142944			46.1	0.0559712	0.000347	-7.3242e-06			46.1	0.126938	0.00991211	-9.7656e-06			46.1	3.9063e-05	6.5918e-05				46.1	0.00050659	0.0005481					46.1	0.775824	0.76904	0.806588			46.1	0.0065454
			46.2	0.00020996	0.00013428	0.00016357			46.2	0.0142456	0.0121582	0.014209			46.2	0.0559712	0.000347	-6.1035e-06			46.2	0.119474	0.00992432	-1.2207e-05			46.2	3.9063e-05	6.7139e-05				46.2	0.00050537	0.00054932					46.2	0.768647	0.755254	0.813765			46.2	0.0065454
			46.3	0.00021118	0.00013428	0.00016602			46.3	0.0142456	0.0121704	0.0141968			46.3	0.0559712	0.000345	4.8828e-06			46.3	0.126938	0.00998535	-9.7656e-06			46.3	3.9063e-05	6.7139e-05				46.3	0.00050415	0.00054932					46.3	0.768647	0.762147	0.820941			46.3	0.0065588
			46.4	0.00020874	0.00013306	0.00016479			46.4	0.0142578	0.012146	0.0141602			46.4	0.0559712	0.000347	2.5635e-05			46.4	0.126938	0.0101074	-9.7656e-06			46.4	3.9063e-05	6.5918e-05				46.4	0.00050659	0.0005481					46.4	0.768647	0.76904	0.806588			46.4	0.006554
			46.5	0.00020874	0.00013428	0.00016479			46.5	0.0141968	0.0121704	0.014209			46.5	0.0559712	0.000347	5.127e-05			46.5	0.126938	0.0101074	-9.7656e-06			46.5	4.0283e-05	6.5918e-05				46.5	0.00050659	0.00054688					46.5	0.783	0.755254	0.813765			46.5	0.0065491
			46.6	0.00020874	0.00013428	0.00016724			46.6	0.0142944	0.0122437	0.0141724			46.6	0.0559712	0.000348	8.3008e-05			46.6	0.126938	0.0100098	-9.7656e-06			46.6	4.0283e-05	6.4697e-05				46.6	0.00050537						46.6	0.768647	0.762147	0.813765			46.6	0.0065454
			46.7	0.00020874	0.00013306	0.00017212			46.7	0.0143066	0.0123169	0.01427			46.7	0.0652504	0.000347	0.00010254			46.7	0.119474	0.00999756	-1.0986e-05			46.7	4.0283e-05	6.4697e-05				46.7	0.00050415						46.7	0.768647	0.755254	0.799412			46.7	0.0065308
			46.8	0.0002063	0.00013428	0.00017456			46.8	0.0142822	0.0123901	0.0142456			46.8	0.0559712	0.000347	0.00011108			46.8	0.119474	0.0100464	-9.7656e-06			46.8	3.9063e-05	6.4697e-05				46.8	0.00050537						46.8	0.768647	0.755254	0.806588			46.8	0.0065417
			46.9	0.0002063	0.00013428	0.00017578			46.9	0.0142212	0.0124878	0.01427			46.9	0.0559712	0.000348	0.00011597			46.9	0.126938	0.0100708	-1.0986e-05			46.9	3.9063e-05	6.5918e-05				46.9	0.00050537						46.9	0.775824	0.755254	0.813765			46.9	0.0065393
			47	0.00020752	0.00013428	0.00017578			47	0.014209	0.0125366	0.0142822			47	0.0652504	0.000347	0.00011353			47	0.119474	0.0100708	-9.7656e-06			47	4.0283e-05	6.4697e-05				47	0.00050537						47	0.768647	0.76904	0.806588			47	0.0065479
			47.1	0.00020996	0.0001355	0.00017212			47.1	0.014209	0.0125366	0.0142822			47.1	0.0652504	0.000345	0.00010498			47.1	0.119474	0.0100952	-1.0986e-05			47.1	3.9063e-05	6.7139e-05				47.1	0.00050415						47.1	0.768647	0.755254	0.806588			47.1	0.0065479
			47.2	0.00020874	0.00013428	0.00016846			47.2	0.01427	0.0125488	0.0142334			47.2	0.0652504	0.000347	0.0001001			47.2	0.126938	0.00999756	-1.0986e-05			47.2	3.7842e-05	6.7139e-05				47.2	0.00050659						47.2	0.775824	0.762147	0.813765			47.2	0.0065381
			47.3	0.00020874	0.00013306	0.00016113			47.3	0.0142578	0.0125854	0.0143066			47.3	0.0559712	0.000348	9.6436e-05			47.3	0.126938	0.00994873	-1.0986e-05			47.3	3.9063e-05	6.5918e-05				47.3	0.00050781						47.3	0.783	0.762147	0.813765			47.3	0.0065259
			47.4	0.00020996	0.00013428	0.00016113			47.4	0.0142456	0.0125977	0.01427			47.4	0.0559712	0.000345	9.3994e-05			47.4	0.126938	0.00998535	-9.7656e-06			47.4	3.9063e-05	6.5918e-05				47.4	0.00050659						47.4	0.775824	0.762147	0.813765			47.4	0.0065527
			47.5	0.00021118	0.00013428	0.00015869			47.5	0.01427	0.0126099	0.0142578			47.5	0.0559712	0.000347	9.3994e-05			47.5	0.119474	0.00992432	-1.0986e-05			47.5	4.0283e-05	6.7139e-05				47.5	0.00050537						47.5	0.768647	0.76904	0.820941			47.5	0.0065515
			47.6	0.0002124	0.00013306	0.00015991			47.6	0.0143066	0.0126831	0.0142456			47.6	0.0652504	0.000347	9.0332e-05			47.6	0.126938	0.00996094	-1.0986e-05			47.6	4.0283e-05	6.7139e-05				47.6	0.00050537						47.6	0.775824	0.755254	0.806588			47.6	0.0065637
			47.7	0.00020996	0.0001355	0.00016357			47.7	0.01427	0.0127319	0.0142578			47.7	0.0559712	0.000347	9.3994e-05			47.7	0.119474	0.00994873	-9.7656e-06			47.7	3.9063e-05	6.7139e-05				47.7	0.00050659						47.7	0.768647	0.755254	0.813765			47.7	0.0065637
			47.8	0.00021118	0.00013428	0.00016846			47.8	0.0143188	0.0127563	0.014209			47.8	0.0559712	0.000348	9.2773e-05			47.8	0.126938	0.00992432	-9.7656e-06			47.8	4.0283e-05	6.5918e-05				47.8	0.00050659						47.8	0.768647	0.76904	0.813765			47.8	0.0065576
			47.9	0.00021118	0.00013306	0.00017334			47.9	0.0142944	0.0127563	0.0142822			47.9	0.0467071	0.000348	8.9111e-05			47.9	0.126938	0.00994873	-1.0986e-05			47.9	3.9063e-05	6.5918e-05				47.9	0.00050659						47.9	0.775824	0.762147	0.813765			47.9	0.0065271
			48	0.00021118	0.00013306	0.000177			48	0.0143066	0.0127563	0.0142944			48	0.0559712	0.000347	8.9111e-05			48	0.126938	0.00996094	-9.7656e-06			48	3.9063e-05	6.7139e-05				48	0.00050537						48	0.761471	0.755254	0.799412			48	0.0065344
			48.1	0.00020996	0.0001355	0.00018311			48.1	0.0143066	0.0127441	0.0143066			48.1	0.0559712	0.000348	8.9111e-05			48.1	0.134404	0.00996094	-9.7656e-06			48.1	3.9063e-05	6.5918e-05				48.1	0.00050415						48.1	0.768647	0.76904	0.813765			48.1	0.0065503
			48.2	0.00020874	0.00013428	0.00018677			48.2	0.0143066	0.0128174	0.014209			48.2	0.0559712	0.000348	9.2773e-05			48.2	0.134404	0.00994873	-9.7656e-06			48.2	3.9063e-05	6.5918e-05				48.2	0.00050781						48.2	0.775824	0.775932	0.813765			48.2	0.0065588
			48.3	0.00020996	0.00013428	0.00018799			48.3	0.0142944	0.0128296	0.0141846			48.3	0.0559712	0.000348	9.5215e-05			48.3	0.126938	0.00998535	-1.0986e-05			48.3	3.9063e-05	6.5918e-05				48.3	0.00050781						48.3	0.768647	0.755254	0.813765			48.3	0.0065515
			48.4	0.00020996	0.00013428	0.00018677			48.4	0.0143066	0.0128418	0.0141235			48.4	0.0652504	0.000347	9.2773e-05			48.4	0.119474	0.00999756	-9.7656e-06			48.4	3.9063e-05	6.5918e-05				48.4	0.00050659						48.4	0.768647	0.762147	0.806588			48.4	0.006543
			48.5	0.00021118	0.00013428	0.00018799			48.5	0.0143066	0.0128784	0.0140137			48.5	0.0652504	0.000347	9.2773e-05			48.5	0.126938	0.00997314	-1.0986e-05			48.5	4.0283e-05	6.4697e-05				48.5	0.00050659						48.5	0.775824	0.762147	0.799412			48.5	0.0065466
			48.6	0.00021118	0.0001355	0.00018799			48.6	0.0142334	0.0128784	0.0140747			48.6	0.0652504	0.000347	9.8877e-05			48.6	0.134404	0.00998535	-9.7656e-06			48.6	4.0283e-05	6.4697e-05				48.6	0.00050659						48.6	0.761471	0.755254	0.813765			48.6	0.0065344
			48.7	0.00020996	0.00013428	0.00019043			48.7	0.0142212	0.012854	0.0141968			48.7	0.0559712	0.000347	0.00010254			48.7	0.126938	0.0100098	-9.7656e-06			48.7	4.0283e-05	6.5918e-05				48.7	0.00050781						48.7	0.775824	0.755254	0.813765			48.7	0.006543
			48.8	0.00020996	0.00013428	0.00019287			48.8	0.0142334	0.0129028	0.0144531			48.8	0.0559712	0.000345	0.00010132			48.8	0.134404	0.00996094	-9.7656e-06			48.8	4.0283e-05	6.5918e-05				48.8	0.00050537						48.8	0.768647	0.762147	0.799412			48.8	0.0065381
			48.9	0.00021118	0.0001355	0.00019531			48.9	0.0142334	0.012915	0.0144775			48.9	0.0559712	0.000348	9.6436e-05			48.9	0.126938	0.00996094	-9.7656e-06			48.9	4.0283e-05	6.8359e-05				48.9	0.00050415						48.9	0.783	0.762147	0.799412			48.9	0.0065381
			49	0.00021118	0.0001355	0.00019653			49	0.01427	0.012915	0.0145142			49	0.0745068	0.000348	9.2773e-05			49	0.119474	0.00996094	-9.7656e-06			49	4.0283e-05	8.0566e-05				49	0.00050659						49	0.775824	0.762147	0.813765			49	0.0065442
			49.1	0.00020996	0.00013428	0.00019897			49.1	0.0142944	0.0129272	0.0145264			49.1	0.0559712	0.000348	9.3994e-05			49.1	0.126938	0.00996094	-9.7656e-06			49.1	4.0283e-05	9.8877e-05				49.1	0.00050781						49.1	0.775824	0.755254	0.799412			49.1	0.006532
			49.2	0.0002124	0.00013428	0.00020142			49.2	0.0142944	0.0129395	0.014502			49.2	0.0467071	0.000347	9.3994e-05			49.2	0.112006	0.00997314	-9.7656e-06			49.2	4.1504e-05	0.00011841				49.2	0.00050537						49.2	0.775824	0.76904	0.799412			49.2	0.0065112
			49.3	0.00021118	0.00013428	0.00020508			49.3	0.0143066	0.0129028	0.0144653			49.3	0.0652504	0.000347	9.0332e-05			49.3	0.126938	0.00999756	-9.7656e-06			49.3	4.0283e-05	0.00014404				49.3	0.00050659						49.3	0.790176	0.762147	0.806588			49.3	0.0065344
			49.4	0.0002124	0.0001355	0.00020508			49.4	0.0142822	0.0129639	0.0144287			49.4	0.0652504	0.000347	8.4229e-05			49.4	0.126938	0.00994873	-9.7656e-06			49.4	4.0283e-05	0.000177				49.4	0.00050659						49.4	0.783	0.762147	0.806588			49.4	0.0065271
			49.5	0.00021118	0.00013428	0.00020752			49.5	0.0142944	0.0129639	0.0143799			49.5	0.0652504	0.000347	8.5449e-05			49.5	0.126938	0.00994873	-9.7656e-06			49.5	3.9063e-05	0.00019775				49.5	0.00050659						49.5	0.775824	0.76904	0.813765			49.5	0.0065283
			49.6	0.0002124	0.0001355	0.00020874			49.6	0.0143188	0.0129761	0.0143677			49.6	0.0652504	0.000348	9.3994e-05			49.6	0.126938	0.00994873	-9.7656e-06			49.6	3.9063e-05	0.00020508				49.6	0.00050659						49.6	0.768647	0.762147	0.806588			49.6	0.0065308
			49.7	0.00021362	0.00013428	0.00020874			49.7	0.0143433	0.0129639	0.0144897			49.7	0.0652504	0.000347	0.0001001			49.7	0.119474	0.00996094	-9.7656e-06			49.7	4.0283e-05	0.00020752				49.7	0.00050537						49.7	0.783	0.755254	0.806588			49.7	0.0065247
			49.8	0.0002124	0.0001355	0.00021118			49.8	0.0143066	0.0129883	0.0146484			49.8	0.0652504	0.000345	0.00010254			49.8	0.126938	0.00996094	-1.0986e-05			49.8	4.1504e-05	0.0002063				49.8	0.00050537						49.8	0.775824	0.775932	0.799412			49.8	0.0065149
			49.9	0.00021118	0.00013428	0.00020996			49.9	0.0143066	0.0129761	0.0146729			49.9	0.0652504	0.000348	0.0001001			49.9	0.119474	0.00996094	-9.7656e-06			49.9	4.1504e-05	0.00020264				49.9	0.00050537						49.9	0.775824	0.775932	0.813765			49.9	0.00651
			50	0.0002124	0.0001355	0.00020874			50	0.0142944	0.012915	0.0146973			50	0.0652504	0.000348	9.8877e-05			50	0.126938	0.00996094	-8.5449e-06			50	4.1504e-05	0.0002002				50	0.00050537						50	0.775824	0.762147	0.806588			50	0.006521
			50.1	0.00021362	0.00013306	0.00020752			50.1	0.0143188	0.0129883	0.0147339			50.1	0.0652504	0.000347	0.00010132			50.1	0.119474	0.00992432	-9.7656e-06			50.1	4.1504e-05	0.0002002											50.1	0.775824	0.762147	0.806588			50.1	0.0065198
			50.2	0.00021362	0.0001355	0.0002063			50.2	0.0143555	0.0130005	0.0147705			50.2	0.0745068	0.000348	0.0001001			50.2	0.119474	0.00994873	-9.7656e-06			50.2	4.0283e-05	0.00019775											50.2	0.783	0.76904	0.813765			50.2	0.0065234
			50.3	0.00021362	0.0001355	0.00020508			50.3	0.0144043	0.0129761	0.0147461			50.3	0.0652504	0.000345	0.00010132			50.3	0.119474	0.00994873	-9.7656e-06			50.3	4.0283e-05	0.00019409											50.3	0.775824	0.762147	0.806588			50.3	0.0065137
			50.4	0.0002124	0.0001355	0.00020508			50.4	0.0144043	0.0129761	0.0148926			50.4	0.0652504	0.000348	0.0001001			50.4	0.126938	0.00996094	-9.7656e-06			50.4	3.9063e-05	0.00018677											50.4	0.775824	0.76904	0.806588			50.4	0.0065198
			50.5	0.00021362	0.0001355	0.0002063			50.5	0.0143555	0.0129761	0.0151123			50.5	0.0652504	0.000347	9.7656e-05			50.5	0.119474	0.00992432	-1.0986e-05			50.5	4.1504e-05	0.00018311											50.5	0.775824	0.76904	0.806588			50.5	0.0065002
			50.6	0.00021362	0.00013428	0.00020752			50.6	0.0143799	0.0129272	0.0151733			50.6	0.0652504	0.000345	0.00010132			50.6	0.119474	0.00992432	-9.7656e-06			50.6	4.0283e-05	0.00018311											50.6	0.775824	0.755254	0.799412			50.6	0.0065222
			50.7	0.00021484	0.0001355	0.00020996			50.7	0.0143799	0.0129517	0.0152954			50.7	0.0652504	0.000347	0.00010132			50.7	0.126938	0.00991211	-9.7656e-06			50.7	4.0283e-05	0.00018677											50.7	0.775824	0.762147	0.806588			50.7	0.0065161
			50.8	0.0002124	0.00013428	0.00020752			50.8	0.0143921	0.0129395	0.0154053			50.8	0.0652504	0.000348	0.00010376			50.8	0.126938	0.00993652	-9.7656e-06			50.8	4.0283e-05	0.00019043											50.8	0.783	0.762147	0.792235			50.8	0.0065173
			50.9	0.0002124	0.0001355	0.00020874			50.9	0.014502	0.0129395	0.0154297			50.9	0.0559712	0.000347	0.00010498			50.9	0.119474	0.00991211	-9.7656e-06			50.9	4.0283e-05	0.00019287											50.9	0.783	0.755254	0.799412			50.9	0.0065173
			51	0.0002124	0.0001355	0.00020996			51	0.0144653	0.0129395	0.0156494			51	0.0652504	0.000347	0.00010498			51	0.126938	0.00992432	-8.5449e-06			51	4.1504e-05	0.00019409											51	0.768647	0.762147	0.799412			51	0.0065283
			51.1	0.00021362	0.00013428	0.00020874			51.1	0.0144531	0.0129272	0.0156616			51.1	0.0652504	0.000347	0.00010498			51.1	0.126938	0.00991211	-9.7656e-06			51.1	4.0283e-05	0.00019287											51.1	0.775824	0.755254	0.792235			51.1	0.0065125
			51.2	0.00021362	0.0001355	0.00020874			51.2	0.0144775	0.0128906	0.0157471			51.2	0.0745068	0.000348	0.0001062			51.2	0.126938	0.0098999	-1.0986e-05			51.2	4.0283e-05	0.00019043											51.2	0.783	0.76904	0.806588			51.2	0.0065112
			51.3	0.00021362	0.00013306	0.00020874			51.3	0.0144531	0.0129639	0.0157471			51.3	0.0652504	0.000347	0.0001062			51.3	0.119474	0.00993652	-8.5449e-06			51.3	4.1504e-05	0.00018921											51.3	0.768647	0.762147	0.806588			51.3	0.0065186
			51.4	0.00021362	0.00013306	0.00020996			51.4	0.0143555	0.0129517	0.0158203			51.4	0.0745068	0.000348	0.00010742			51.4	0.126938	0.00994873	-9.7656e-06			51.4	4.0283e-05	0.00018799											51.4	0.783	0.762147	0.806588			51.4	0.0065112
			51.5	0.00021362	0.00013428	0.00021118			51.5	0.0144409	0.0129517	0.0158081			51.5	0.0745068	0.000347	0.00010742			51.5	0.119474	0.00994873	-9.7656e-06			51.5	4.0283e-05	0.00018677											51.5	0.775824	0.762147	0.799412			51.5	0.0065063
			51.6	0.00021362	0.00013428	0.0002124			51.6	0.0144653	0.0129639	0.0158569			51.6	0.0652504	0.000348	0.00010742			51.6	0.126938	0.00996094	-9.7656e-06			51.6	4.0283e-05	0.00018921											51.6	0.783	0.775932	0.799412			51.6	0.0065076
			51.7	0.00021362	0.0001355	0.00021362			51.7	0.014502	0.0129639	0.0159058			51.7	0.0745068	0.000348	0.00010864			51.7	0.126938	0.00994873	-1.0986e-05			51.7	4.1504e-05	0.00019165											51.7	0.783	0.762147	0.806588			51.7	0.0065027
			51.8	0.00021362	0.0001355	0.00021484			51.8	0.014502	0.0129272	0.015979			51.8	0.0652504	0.000348	0.00010864			51.8	0.126938	0.00993652	-9.7656e-06			51.8	4.1504e-05	0.00019531											51.8	0.783	0.762147	0.813765			51.8	0.0064868
			51.9	0.00021362	0.00013428	0.00021606			51.9	0.0144653	0.012915	0.0160278			51.9	0.0652504	0.000348	0.00010864			51.9	0.126938	0.0098999	-9.7656e-06			51.9	4.1504e-05	0.00019775											51.9	0.790176	0.762147	0.806588			51.9	0.0065112
			52	0.00021484	0.00013672	0.00021729			52	0.0144165	0.0129639	0.0160645			52	0.0652504	0.000347	0.0001062			52	0.126938	0.00992432	-9.7656e-06			52	4.0283e-05	0.00020142											52	0.768647	0.76904	0.820941			52	0.0065027
			52.1	0.00021362	0.0001355	0.00021606			52.1	0.0144531	0.0129883	0.0159302			52.1	0.0652504	0.000347	0.0001062			52.1	0.126938	0.0098999	-8.5449e-06			52.1	4.0283e-05	0.00020142											52.1	0.768647	0.762147	0.835294			52.1	0.0064978
			52.2	0.00021362	0.00013428	0.00021729			52.2	0.0144409	0.0129883	0.0160522			52.2	0.0559712	0.000348	0.00010864			52.2	0.126938	0.00992432	-8.5449e-06			52.2	4.1504e-05	0.00019897											52.2	0.783	0.76904	0.842471			52.2	0.0065002
			52.3	0.00021484	0.00013428	0.00021851			52.3	0.0143921	0.0129639	0.0161255			52.3	0.0559712	0.000345	0.00010864			52.3	0.126938	0.00991211	-9.7656e-06			52.3	4.2725e-05	0.00019897											52.3	0.790176	0.762147	0.849647			52.3	0.006499
			52.4	0.00021606	0.00013306	0.00021851			52.4	0.0143921	0.0129517	0.0160889			52.4	0.0652504	0.000347	0.00010742			52.4	0.126938	0.00992432	-9.7656e-06			52.4	4.1504e-05	0.00020142											52.4	0.790176	0.76904	0.849647			52.4	0.006488
			52.5	0.00021362	0.0001355	0.00021729			52.5	0.0143677	0.0129395	0.0161865			52.5	0.0745068	0.000347	0.00010742			52.5	0.126938	0.0098877	-8.5449e-06			52.5	4.1504e-05	0.00020264											52.5	0.783	0.775932	0.864			52.5	0.0065015
			52.6	0.00021362	0.0001355	0.00021851			52.6	0.0143311	0.0130005	0.0162354			52.6	0.0652504	0.000345	0.0001062			52.6	0.126938	0.00993652	-9.7656e-06			52.6	4.1504e-05	0.00020386											52.6	0.790176	0.76904	0.871235			52.6	0.0065125
			52.7	0.00021362	0.0001355	0.00021973			52.7	0.0143433	0.0129883	0.0161865			52.7	0.0745068	0.000347	0.00010742			52.7	0.126938	0.00993652	-9.7656e-06			52.7	4.1504e-05	0.00020508											52.7	0.783	0.775932	0.878412			52.7	0.0065039
			52.8	0.00021484	0.0001355	0.00022095			52.8	0.0143066	0.0129883	0.0162109			52.8	0.0652504	0.000348	0.00010742			52.8	0.119474	0.00994873	-8.5449e-06			52.8	4.1504e-05	0.00020508											52.8	0.775824	0.76904	0.885588			52.8	0.0065088
			52.9	0.00021606	0.00013428	0.00022217			52.9	0.01427	0.0129639	0.0161987			52.9	0.0652504	0.000345	0.00010742			52.9	0.126938	0.00992432	-9.7656e-06			52.9	4.1504e-05	0.00020508											52.9	0.775824	0.76904	0.907118			52.9	0.0065088
			53	0.00021484	0.0001355	0.00022339			53	0.0142944	0.0129639	0.0161377			53	0.0652504	0.000348	0.0001062			53	0.134404	0.00993652	-9.7656e-06			53	4.1504e-05	0.00020386											53	0.783	0.76904	0.928647			53	0.0065039
			53.1	0.00021484	0.0001355	0.00022461			53.1	0.01427	0.0129395	0.0161377			53.1	0.0559712	0.000347	0.0001062			53.1	0.126938	0.0098877	-8.5449e-06			53.1	4.2725e-05	0.00020264											53.1	0.783	0.76904	0.957353			53.1	0.0064856
			53.2	0.00021606	0.00013428	0.00022583			53.2	0.0142578	0.0130127	0.0159058			53.2	0.0652504	0.000347	0.00010742			53.2	0.126938	0.00991211	-8.5449e-06			53.2	4.1504e-05	0.00020508											53.2	0.775824	0.762147	0.993294			53.2	0.0064978
			53.3	0.00021606	0.0001355	0.00022583			53.3	0.0143555	0.0129883	0.0157471			53.3	0.0652504	0.000347	0.0001062			53.3	0.126938	0.0098877	-9.7656e-06			53.3	4.1504e-05	0.00020508											53.3	0.775824	0.762147	1.00765			53.3	0.0065076
			53.4	0.00021606	0.0001355	0.00022461			53.4	0.0144409	0.0130005	0.0158325			53.4	0.0745068	0.000348	0.0001062			53.4	0.126938	0.0098877	-8.5449e-06			53.4	4.0283e-05	0.0002063											53.4	0.768647	0.762147	1.01482			53.4	0.0065002
			53.5	0.00021484	0.0001355	0.00022583			53.5	0.0144653	0.0130005	0.0159668			53.5	0.0652504	0.000347	0.00010742			53.5	0.119474	0.0098999	-8.5449e-06			53.5	4.1504e-05	0.0002063											53.5	0.775824	0.755254	1.03635			53.5	0.00651
			53.6	0.00021484	0.0001355	0.00022583			53.6	0.0143799	0.0130005	0.0160156			53.6	0.0559712	0.000347	0.0001062			53.6	0.126938	0.00993652	-8.5449e-06			53.6	4.1504e-05	0.0002063											53.6	0.783	0.76904	1.03635			53.6	0.0065076
			53.7	0.00021484	0.00013428	0.00022705			53.7	0.0143555	0.0129761	0.015979			53.7	0.0652504	0.000347	0.00010742			53.7	0.126938	0.00991211	-9.7656e-06			53.7	4.1504e-05	0.00020752											53.7	0.783	0.76904	1.04353			53.7	0.0064771
			53.8	0.00021484	0.0001355	0.00022827			53.8	0.0143433	0.0130127	0.0160889			53.8	0.0745068	0.000347	0.0001062			53.8	0.126938	0.00992432	-8.5449e-06			53.8	4.0283e-05	0.00020752											53.8	0.775824	0.762147	1.05788			53.8	0.0065002
			53.9	0.00021484	0.0001355	0.00022705			53.9	0.0142578	0.0129883	0.0161743			53.9	0.0652504	0.000349	0.00010742			53.9	0.126938	0.00992432	-8.5449e-06			53.9	4.0283e-05	0.00020752											53.9	0.783	0.76904	1.04353			53.9	0.0065051
			54	0.00021484	0.0001355	0.00022827			54	0.0143799	0.0129883	0.0161621			54	0.0745068	0.000348	0.00010742			54	0.134404	0.00993652	-8.5449e-06			54	4.1504e-05	0.0002063											54	0.783	0.775932	1.03635			54	0.0064954
			54.1	0.00021484	0.0001355	0.00022583			54.1	0.0142944	0.0129639	0.0162109			54.1	0.0652504	0.000347	0.00010864			54.1	0.126938	0.00993652	-8.5449e-06			54.1	4.2725e-05	0.0002063											54.1	0.783	0.762147	1.05071			54.1	0.0065051
			54.2	0.00021484	0.0001355	0.00022705			54.2	0.0142212	0.0129639	0.0161743			54.2	0.0745068	0.000347	0.00010742			54.2	0.119474	0.00992432	-8.5449e-06			54.2	4.1504e-05	0.00020508											54.2	0.775824	0.775932	1.04353			54.2	0.0065027
			54.3	0.00021484	0.0001355	0.00022583			54.3	0.014209	0.0129272	0.0161499			54.3	0.0652504	0.000349	0.00010742			54.3	0.134404		-8.5449e-06			54.3	4.0283e-05	0.00020386											54.3	0.783	0.775932	1.02918			54.3	0.0064868
			54.4	0.00021484	0.00013428	0.00022583			54.4	0.014209	0.0129883	0.0161499			54.4	0.0652504	0.000348	0.0001062			54.4	0.126938		-7.3242e-06			54.4	4.1504e-05	0.00020386											54.4	0.783	0.762147	1.03635			54.4	0.0064783
			54.5	0.00021362	0.0001355	0.00022461			54.5	0.014209	0.0129883	0.0161255			54.5	0.0652504	0.000348	0.00010742			54.5	0.126938		-9.7656e-06			54.5	4.2725e-05	0.00020386											54.5	0.775824	0.762147	1.03635			54.5	0.0065027
			54.6	0.00021606	0.0001355	0.00022339			54.6	0.0143311	0.0129761	0.0160278			54.6	0.0652504	0.000345	0.00010742			54.6	0.126938		-8.5449e-06			54.6	4.1504e-05	0.00020508											54.6	0.790176	0.76904	1.02918			54.6	0.006499
			54.7	0.00021606	0.00013428	0.00022217			54.7	0.0143066	0.0129761	0.0161133			54.7	0.0652504	0.000348	0.00010742			54.7	0.119474		-7.3242e-06			54.7	4.1504e-05	0.00020264											54.7	0.790176	0.775932	1.03635			54.7	0.0064917
			54.8	0.00021484	0.0001355	0.00022217			54.8	0.0143433	0.0129761	0.0160645			54.8	0.0559712	0.000348	0.00010742			54.8	0.126938		-8.5449e-06			54.8	4.1504e-05	0.00020264											54.8	0.790176	0.775932	1.05071			54.8	0.0064832
			54.9	0.00021606	0.00013306	0.00022339			54.9	0.0143311	0.0129272	0.0160889			54.9	0.0652504	0.000348	0.00010742			54.9	0.126938		-8.5449e-06			54.9	4.1504e-05	0.00020386											54.9	0.775824	0.76904	1.03635			54.9	0.0064807
			55	0.00021484	0.00013428	0.00022339			55	0.0143311	0.0129639	0.0161011			55	0.0745068	0.000347	0.00010864			55	0.126938		-7.3242e-06			55	4.1504e-05	0.00020508											55	0.783	0.762147	1.02918			55	0.0064612
			55.1	0.00021484	0.0001355	0.00022461			55.1	0.0142822	0.0130005	0.0161377			55.1	0.0652504	0.000348	0.00010742			55.1	0.134404		-8.5449e-06			55.1	4.1504e-05	0.00020508											55.1	0.783	0.76904	1.03635			55.1	0.0064807
			55.2	0.00021484	0.0001355	0.00022583			55.2	0.0142944	0.0129761	0.0161011			55.2	0.0745068	0.00035	0.00010742			55.2	0.134404		-7.3242e-06			55.2	4.1504e-05	0.00020508											55.2	0.790176	0.789718	1.04353			55.2	0.0064917
			55.3	0.00021484	0.0001355	0.00022583			55.3	0.0142822	0.0129517	0.0162231			55.3	0.0652504	0.000348	0.00010864			55.3	0.126938		-8.5449e-06			55.3	4.1504e-05	0.0002063											55.3	0.797353	0.775932	1.04353			55.3	0.0064917
			55.4	0.00021484	0.0001355	0.00022705			55.4	0.0143311	0.0129761	0.0161743			55.4	0.0559712	0.000349	0.00010742			55.4	0.126938		-8.5449e-06			55.4	4.1504e-05	0.00020508											55.4	0.790176	0.789718	1.05071			55.4	0.006499
			55.5	0.00021362	0.0001355	0.00022827			55.5	0.0143555	0.0129883	0.0161621			55.5	0.0745068	0.000347	0.0001062			55.5	0.134404		-9.7656e-06			55.5	4.0283e-05	0.0002063											55.5	0.775824	0.79661	1.05788			55.5	0.0064978
			55.6	0.00021484	0.0001355	0.00022827			55.6	0.0143921	0.0129517	0.0161133			55.6	0.0652504	0.000348	0.0001062			55.6	0.126938		-9.7656e-06			55.6	4.2725e-05	0.0002063											55.6	0.761471	0.810395	1.05071			55.6	0.0064844
			55.7	0.00021362	0.00013428	0.00022827			55.7	0.0144287	0.0129761	0.0161255			55.7	0.0559712	0.000348	0.00010742			55.7	0.126938		-8.5449e-06			55.7	4.2725e-05	0.00020752											55.7	0.775824	0.817288	1.05788			55.7	0.0064941
			55.8	0.00021484	0.00013306	0.00022949			55.8	0.0144775	0.0130005	0.0161377			55.8	0.0652504	0.000348	0.00010742			55.8	0.134404		-9.7656e-06			55.8	4.1504e-05	0.00020752											55.8	0.790176	0.837966	1.04353			55.8	0.006499
			55.9	0.00021484	0.00013428	0.00022949			55.9	0.0144653	0.0129883	0.0161743			55.9	0.0652504	0.000347	0.00010742			55.9	0.126938		-8.5449e-06			55.9	4.1504e-05	0.00020752											55.9	0.783	0.851808	1.02918			55.9	0.0064954
			56	0.00021606	0.0001355	0.00023071			56	0.0144653	0.0129639	0.0161011			56	0.0652504	0.000349	0.0001062			56	0.126938		-8.5449e-06			56	4.1504e-05	0.00020874											56	0.783	0.872486	1.02918			56	0.006488
			56.1	0.00021606	0.00013672	0.00023071			56.1	0.0144165	0.0129272	0.0161255			56.1	0.0652504	0.000349	0.0001062			56.1	0.134404		-8.5449e-06			56.1	4.1504e-05	0.00020752											56.1	0.775824	0.879379	1.03635			56.1	0.0064954
			56.2	0.00021606	0.0001355	0.00023071			56.2	0.0143799	0.0128662	0.0160767			56.2	0.0652504	0.000348	0.00010742			56.2	0.134404		-8.5449e-06			56.2	4.2725e-05	0.00020752											56.2	0.790176	0.879379	1.04353			56.2	0.006488
			56.3	0.00021484	0.00013428	0.00022949			56.3	0.0144043	0.0129517	0.0161377			56.3	0.0652504	0.000347	0.00010742			56.3	0.126938		-7.3242e-06			56.3	4.3945e-05	0.00020752											56.3	0.768647	0.886271	1.02918			56.3	0.0064795
			56.4	0.00021484	0.00013428	0.00023071			56.4	0.0144043	0.0129395	0.0161255			56.4	0.0745068	0.000348	0.00010742			56.4	0.134404		-8.5449e-06			56.4	4.2725e-05	0.00020752											56.4	0.783	0.879379	1.03635			56.4	0.0065015
			56.5	0.00021484	0.00013428	0.00023071			56.5	0.0143799	0.0129395	0.0160889			56.5	0.0652504	0.000348	0.00010742			56.5	0.134404		-7.3242e-06			56.5	4.1504e-05	0.0002063											56.5	0.797353	0.893164	1.04353			56.5	0.0065002
			56.6	0.00021484	0.00013306	0.00023071			56.6	0.0144043	0.0129639	0.0161377			56.6	0.0559712	0.000347	0.00010864			56.6	0.134404		-8.5449e-06			56.6	4.1504e-05	0.00020752											56.6	0.783	0.872486	1.05788			56.6	0.0064868
			56.7	0.00021484	0.00013428	0.00023071			56.7	0.0143799	0.0129639	0.0161377			56.7	0.0652504	0.000347	0.00010742			56.7	0.126938		-8.5449e-06			56.7	4.2725e-05	0.0002063											56.7	0.783	0.865593	1.04353			56.7	0.0064941
			56.8	0.00021606	0.00013428	0.00023193			56.8	0.0143433	0.0130005	0.0161133			56.8	0.0745068	0.000345	0.00010864			56.8	0.134404		-8.5449e-06			56.8	4.1504e-05	0.0002063											56.8	0.783	0.872486	1.04353			56.8	0.0064917
			56.9	0.00021606	0.00013428	0.00023071			56.9	0.0144775	0.0130493	0.0161255			56.9	0.0745068	0.000345	0.0001062			56.9	0.134404		-8.5449e-06			56.9	4.1504e-05	0.0002063											56.9	0.783	0.865593	1.04353			56.9	0.0064636
			57	0.00021484	0.0001355	0.00023193			57	0.0144531	0.0130005	0.0161011			57	0.0745068	0.000347	0.00010742			57	0.134404		-8.5449e-06			57	4.1504e-05	0.00020752											57	0.790176	0.858701	1.04353			57	0.0064905
			57.1	0.00021484	0.0001355	0.00023071			57.1	0.0145752	0.0130005	0.0161499			57.1	0.0745068	0.000348	0.00010742			57.1	0.134404		-8.5449e-06			57.1	4.1504e-05	0.0002063											57.1	0.790176	0.851808	1.04353			57.1	0.0064966
			57.2	0.00021606	0.00013428	0.00023193			57.2	0.014624	0.0130005	0.0161987			57.2	0.0745068	0.000348	0.00010742			57.2	0.134404		-7.3242e-06			57.2	4.1504e-05	0.0002063											57.2	0.783	0.851808	1.04353			57.2	0.006488
			57.3	0.00021484	0.00013428	0.00023315			57.3	0.0146606	0.0130249	0.0161743			57.3	0.0745068	0.000348	0.0001062			57.3	0.134404		-7.3242e-06			57.3	4.1504e-05	0.00020752											57.3	0.783	0.858701	1.04353			57.3	0.0064844
			57.4	0.00021484	0.0001355	0.00023315			57.4	0.0146484	0.0129883	0.0161865			57.4	0.0652504	0.000348	0.0001062			57.4	0.14187		-7.3242e-06			57.4	4.1504e-05	0.0002063											57.4	0.783	0.858701	1.04353			57.4	0.0064966
			57.5	0.00021606	0.00013428	0.00023315			57.5	0.0146606	0.0130127	0.0161377			57.5	0.0652504	0.000347	0.00010742			57.5	0.126938		-7.3242e-06			57.5	4.2725e-05	0.00020508											57.5	0.768647	0.858701	1.05071			57.5	0.0064709
			57.6	0.00021606	0.00013428	0.00023193			57.6	0.0146851	0.0130127	0.0161621			57.6	0.0745068	0.000348	0.00010864			57.6	0.134404		-7.3242e-06			57.6	4.3945e-05	0.00020508											57.6	0.775824	0.872486	1.04353			57.6	0.0064771
			57.7	0.00021606	0.00013428	0.00023315			57.7	0.0147949	0.0130005	0.0161377			57.7	0.0745068	0.000345	0.0001062			57.7	0.14187		-8.5449e-06			57.7	4.2725e-05	0.00020508											57.7	0.775824	0.858701	1.04353			57.7	0.006488
			57.8	0.00021484	0.0001355	0.00023071			57.8	0.0147827	0.0129883	0.0161743			57.8	0.0745068	0.000349	0.00010742			57.8	0.134404		-7.3242e-06			57.8	4.1504e-05	0.00020508											57.8	0.775824	0.851808	1.04353			57.8	0.0064722
			57.9	0.00021606	0.00013672	0.00023071			57.9	0.0147705	0.0129883	0.0161499			57.9	0.0652504	0.000348	0.00010864			57.9	0.134404		-7.3242e-06			57.9	4.0283e-05	0.0002063											57.9	0.775824	0.851808	1.04353			57.9	0.0064746
			58	0.00021606	0.00013428	0.00023071			58	0.0147461	0.0129761	0.0161865			58	0.0745068	0.000348	0.00010742			58	0.14187		-7.3242e-06			58	4.0283e-05	0.00020508											58	0.790176	0.858701	1.04353			58	0.0064709
			58.1	0.00021606	0.0001355	0.00023071			58.1	0.0146973	0.0129761	0.0161255			58.1	0.0745068	0.000348	0.00010742			58.1	0.134404		-7.3242e-06			58.1	4.1504e-05	0.00020508											58.1	0.783	0.865593	1.02918			58.1	0.0064746
			58.2	0.00021729	0.00013428	0.00023193			58.2	0.0146484	0.0129883	0.0161499			58.2	0.0745068	0.000348	0.00010742			58.2	0.14187		-8.5449e-06			58.2	4.1504e-05	0.0002063											58.2	0.775824	0.872486	1.03635			58.2	0.0064575
			58.3	0.00021484	0.0001355	0.00023193			58.3	0.0147461	0.0129883	0.0161133			58.3	0.0652504	0.000348	0.0001062			58.3	0.134404		-7.3242e-06			58.3	4.2725e-05	0.0002063											58.3	0.790176	0.893164	1.03635			58.3	0.0064783
			58.4	0.00021606	0.0001355	0.00023315			58.4	0.0146729	0.0130005	0.0161621			58.4	0.0652504	0.000349	0.00010742			58.4	0.134404		-7.3242e-06			58.4	4.1504e-05	0.0002063											58.4	0.775824	0.893164	1.04353			58.4	0.0064844
			58.5	0.00021606	0.00013672	0.00023315			58.5	0.0146973	0.0129883	0.0161011			58.5	0.0745068	0.000348	0.00010742			58.5	0.126938		-8.5449e-06			58.5	4.1504e-05	0.00020508											58.5	0.790176	0.900056	1.03635			58.5	0.0064844
			58.6	0.00021606	0.00013672	0.00023437			58.6	0.0146973	0.0129395	0.0161377			58.6	0.0745068	0.000349	0.00010742			58.6	0.126938		-8.5449e-06			58.6	4.2725e-05	0.0002063											58.6	0.790176	0.913842	1.03635			58.6	0.0064917
			58.7	0.00021729	0.00013672	0.00023315			58.7	0.0147339	0.0128906	0.0161255			58.7	0.0745068	0.000349	0.0001062			58.7	0.134404		-7.3242e-06			58.7	4.1504e-05	0.0002063											58.7	0.790176	0.927627	1.04353			58.7	0.0064954
			58.8	0.00021484	0.00013672	0.0002356			58.8	0.0147827	0.0129395	0.0161377			58.8	0.0652504	0.000349	0.00010864			58.8	0.126938		-7.3242e-06			58.8	4.2725e-05	0.0002063											58.8	0.790176	0.906949	1.04353			58.8	0.0064709
			58.9	0.00021484	0.00013916	0.00023315			58.9	0.0148438	0.0129395	0.0160645			58.9	0.0652504	0.000349	0.0001062			58.9	0.134404		-7.3242e-06			58.9	4.3945e-05	0.0002063											58.9	0.790176	0.906949	1.03635			58.9	0.006488
			59	0.00021484	0.0001416	0.00023437			59	0.0148193	0.0129272	0.0161377			59	0.0745068	0.000348	0.0001062			59	0.134404		-7.3242e-06			59	4.1504e-05	0.0002063											59	0.783	0.920734	1.04353			59	0.0064917
			59.1	0.00021606	0.00014282	0.00023315			59.1	0.014856	0.0129395	0.0161377			59.1	0.0652504	0.000349	0.0001062			59.1	0.134404		-7.3242e-06			59.1	4.0283e-05												59.1	0.783	0.927627	1.03635			59.1	0.0064941
			59.2	0.00021606	0.00014526	0.00023193			59.2	0.0148682	0.0129028	0.0161255			59.2	0.0652504	0.000348	0.0001062			59.2	0.134404		-7.3242e-06			59.2	4.1504e-05												59.2	0.775824	0.93452	1.05071			59.2	0.0064978
			59.3	0.00021606	0.00014893	0.00023193			59.3	0.0148926	0.012854	0.0161621			59.3	0.0745068	0.000349	0.00010742			59.3	0.14187		-8.5449e-06			59.3	4.1504e-05												59.3	0.783	0.920734	1.02918			59.3	0.0064966
			59.4	0.00021606	0.00015259	0.00023315			59.4	0.0148193	0.0129272	0.0161377			59.4	0.0652504	0.000348	0.00010742			59.4	0.134404		-7.3242e-06			59.4	4.1504e-05												59.4	0.775824	0.927627	1.03635			59.4	0.0064807
			59.5	0.00021606	0.00015503	0.00023193			59.5	0.0149048	0.0129272	0.0160767			59.5	0.0745068	0.000349	0.00010742			59.5	0.14187		-7.3242e-06			59.5	4.1504e-05												59.5	0.783	0.920734	1.03635			59.5	0.0064783
			59.6	0.00021729	0.00015503	0.00023315			59.6	0.0148926	0.0129395	0.0161743			59.6	0.0745068	0.000348	0.0001062			59.6	0.134404		-7.3242e-06			59.6	4.1504e-05												59.6	0.783	0.920734	1.03635			59.6	0.0064795
			59.7	0.00021484	0.00015625	0.00023315			59.7	0.0149292	0.012915	0.0161621			59.7	0.0559712	0.000348	0.0001062			59.7	0.134404		-7.3242e-06			59.7	4.2725e-05												59.7	0.783	0.920734	1.03635			59.7	0.0064832
			59.8	0.00021484	0.00015869	0.00023315			59.8	0.0150269	0.0129028	0.0161133			59.8	0.0652504	0.000347	0.00010742			59.8	0.134404		-8.5449e-06			59.8	4.1504e-05												59.8	0.783	0.93452	1.04353			59.8	0.0064771
			59.9	0.00021484	0.00015869	0.00023315			59.9	0.0150513	0.0128296	0.0161377			59.9	0.0652504	0.000349	0.00010742			59.9	0.134404		-7.3242e-06			59.9	4.2725e-05												59.9	0.783	0.93452	1.04353			59.9	0.0064709
			60	0.00021606	0.00016113	0.00023315			60	0.0150635	0.0128784	0.0161377			60	0.0745068	0.000349	0.00010742			60	0.134404		-7.3242e-06			60	4.1504e-05												60	0.783	0.941412	1.04353			60	0.0064709
			60.1	0.00021606	0.00016235				60.1	0.0151855	0.0128418	0.01604			60.1	0.0652504	0.000348	0.00010742			60.1	0.134404		-7.3242e-06			60.1	4.2725e-05												60.1	0.790176	0.948362	1.03635
			60.2	0.00021484	0.00016235				60.2	0.015271	0.0127686	0.0161011			60.2	0.0652504	0.000349	0.00010742			60.2	0.14187		-7.3242e-06			60.2	4.2725e-05												60.2	0.783	0.93452	1.03635
			60.3	0.00021606	0.00016357				60.3	0.0153198	0.0128418	0.0161255			60.3	0.0745068	0.000348	0.00010742			60.3	0.14187		-8.5449e-06			60.3	4.3945e-05												60.3	0.775824	0.948362	1.04353
			60.4	0.00021606	0.00016602				60.4	0.0153687	0.012854	0.0161255			60.4	0.0745068	0.000349	0.00010742			60.4	0.14187		-8.5449e-06			60.4	4.2725e-05												60.4	0.790176	0.948362	1.02918
			60.5	0.00021606	0.00016968				60.5	0.0153442	0.012854	0.0161011			60.5	0.0652504	0.000352	0.00010742			60.5	0.14187		-6.1035e-06			60.5	4.1504e-05												60.5	0.790176	0.948362	1.02918
			60.6	0.00021606	0.00017212				60.6	0.0152832	0.0129272	0.0161133			60.6	0.0652504	0.000349	0.00010742			60.6	0.14187		-7.3242e-06			60.6	4.2725e-05												60.6	0.775824	0.941412	1.02918
			60.7	0.00021484	0.00017456				60.7	0.0153442	0.0129395	0.0160645			60.7	0.0652504	0.000348	0.00010864			60.7	0.134404		-7.3242e-06			60.7	4.1504e-05												60.7	0.783	0.955254	1.03635
			60.8	0.00021729	0.000177				60.8	0.0153931	0.012915	0.0160767			60.8	0.0837633	0.000349	0.00010742			60.8	0.14187		-7.3242e-06			60.8	4.1504e-05												60.8	0.790176	0.955254	1.02918
			60.9	0.00021606	0.00017822				60.9	0.0153809	0.0129028	0.0160645			60.9	0.0745068	0.000349	0.00010742			60.9	0.14187		-6.1035e-06			60.9	4.1504e-05												60.9	0.790176	0.941412	1.03635
			61	0.00021606	0.00017944				61	0.0153809	0.012915	0.0161255			61	0.0652504	0.000349	0.00010742			61	0.14187		-7.3242e-06			61	4.1504e-05												61	0.790176	0.948362	1.02918
			61.1	0.00021484	0.00018066				61.1	0.0153687		0.0161377			61.1	0.0745068	0.000349	0.00010864			61.1	0.14187		-7.3242e-06			61.1	4.2725e-05												61.1	0.790176	0.948362	1.03635
			61.2	0.00021606	0.00018188				61.2	0.0154053		0.0161377			61.2	0.0745068	0.000349	0.00010742			61.2	0.134404		-8.5449e-06			61.2	4.2725e-05												61.2	0.783	0.955254	1.02918
			61.3	0.00021606	0.00018311				61.3	0.0153687		0.0161011			61.3	0.0745068	0.000349	0.00010742			61.3	0.14187		-7.3242e-06			61.3	4.2725e-05												61.3	0.783	0.941412	1.03635
			61.4	0.00021729	0.00018311				61.4	0.0154907		0.0160156			61.4	0.0652504	0.000349	0.0001062			61.4	0.14187		-6.1035e-06			61.4	4.2725e-05												61.4	0.790176	0.941412	1.04353
			61.5	0.00021729	0.00018188				61.5	0.0154785		0.0160156			61.5	0.0652504	0.000349	0.00010742			61.5	0.134404		-8.5449e-06			61.5	4.1504e-05												61.5	0.775824	0.927627	1.02918
			61.6	0.00021606	0.00018555				61.6	0.0155151		0.0161011			61.6	0.0745068	0.000348	0.00010742			61.6	0.134404		-7.3242e-06			61.6	4.2725e-05												61.6	0.775824	0.948362	1.022
			61.7	0.00021484	0.00018799				61.7	0.0155273		0.0161255			61.7	0.0837633	0.000349	0.00010742			61.7	0.14187		-6.1035e-06			61.7	4.2725e-05												61.7	0.775824	0.941412	1.03635
			61.8	0.00021606	0.00019165				61.8	0.0155029		0.0161255			61.8	0.0745068	0.00035	0.00010864			61.8	0.14187		-7.3242e-06			61.8	4.2725e-05												61.8	0.783	0.941412	1.04353
			61.9	0.00021729	0.00019531				61.9	0.0155029		0.0161621			61.9	0.0652504	0.000349	0.00010864			61.9	0.14187		-7.3242e-06			61.9	4.1504e-05												61.9	0.790176	0.93452	1.02918
			62	0.00021606	0.00019409				62	0.0155518		0.0161011			62	0.0652504	0.000348	0.00010864			62	0.14187		-7.3242e-06			62	4.2725e-05												62	0.783	0.948362	1.022
			62.1	0.00021606	0.00019653				62.1	0.0155396		0.0161499			62.1	0.0652504	0.000349	0.00010864			62.1	0.14187		-7.3242e-06			62.1	4.2725e-05												62.1	0.783	0.941412	1.02918
			62.2	0.00021729	0.0002002				62.2	0.0155762		0.0161743			62.2	0.0652504	0.000352	0.00010742			62.2	0.14187		-7.3242e-06			62.2	4.2725e-05												62.2	0.775824	0.93452	1.03635
			62.3	0.00021729	0.0002002				62.3	0.0155273		0.0161743			62.3	0.0652504	0.00035	0.00010742			62.3	0.134404		-7.3242e-06			62.3	4.2725e-05												62.3	0.783	0.948362	1.03635
			62.4	0.00021729	0.00020264				62.4	0.0155273		0.0161621			62.4	0.0652504	0.000349	0.00010742			62.4	0.14187		-8.5449e-06			62.4	4.2725e-05												62.4	0.775824	0.941412	1.02918
			62.5	0.00021729	0.00020142				62.5	0.0154907		0.0161743			62.5	0.0837633	0.00035	0.00010742			62.5	0.14187		-8.5449e-06			62.5	4.2725e-05												62.5	0.790176	0.941412	1.022
			62.6	0.00021606	0.00020386				62.6	0.015564		0.0161499			62.6	0.0745068	0.000349	0.00010742			62.6	0.14187		-7.3242e-06			62.6	4.3945e-05												62.6	0.768647	0.948362	1.022
			62.7	0.00021729	0.00020508				62.7	0.015564		0.0161987			62.7	0.0745068	0.000349	0.00010742			62.7	0.14187		-7.3242e-06			62.7	4.2725e-05												62.7	0.790176	0.948362	1.03635
			62.8	0.00021606	0.00020752				62.8	0.0155029		0.0161499			62.8	0.0745068	0.000349	0.00010742			62.8	0.134404		-7.3242e-06			62.8	4.3945e-05												62.8	0.790176	0.948362	1.03635
			62.9	0.00021606	0.00020142				62.9	0.0154541		0.0161133			62.9	0.0745068	0.000348	0.00010742			62.9	0.14187		-8.5449e-06			62.9	4.3945e-05												62.9	0.783	0.941412	1.03635
			63	0.00021606	0.00020264				63	0.0154907		0.0161743			63	0.0652504	0.000349	0.00010742			63	0.14187		-7.3242e-06			63	4.2725e-05												63	0.783	0.948362	1.02918
			63.1	0.00021729	0.00020386				63.1	0.0155029		0.0161865			63.1	0.0745068	0.000349	0.00010742			63.1	0.14187		-7.3242e-06			63.1	4.1504e-05												63.1	0.775824	0.955254	1.02918
			63.2	0.00021729	0.00020508				63.2	0.015564		0.0161743			63.2	0.0652504	0.000349	0.00010742			63.2	0.14187		-7.3242e-06			63.2	4.2725e-05												63.2	0.797353	0.948362	1.03635
			63.3	0.00021606	0.0002063				63.3	0.0155884		0.0161987			63.3	0.0652504	0.000348	0.00010864			63.3	0.134404		-7.3242e-06			63.3	4.2725e-05												63.3	0.775824	0.955254	1.02918
			63.4	0.00021606	0.00020386				63.4	0.0156128		0.0161865			63.4	0.0745068	0.000349	0.00010864			63.4	0.134404		-7.3242e-06			63.4	4.2725e-05												63.4	0.775824	0.96904	1.02918
			63.5	0.00021729	0.00020508				63.5	0.0155762		0.0161499			63.5	0.0745068	0.000349	0.00010864			63.5	0.149336		-6.1035e-06			63.5	4.3945e-05												63.5	0.775824	0.96904	1.02918
			63.6	0.00021606	0.00020386				63.6	0.0155762		0.0161865			63.6	0.0745068	0.00035	0.0001062			63.6	0.14187		-7.3242e-06			63.6	4.2725e-05												63.6	0.783	0.96904	1.022
			63.7	0.00021729	0.00020386				63.7	0.0155762		0.0161499			63.7	0.0652504	0.000348	0.00010864			63.7	0.14187		-8.5449e-06			63.7	4.2725e-05												63.7	0.775824	0.96904	1.022
			63.8	0.00021606	0.00020264				63.8	0.015625		0.0160522			63.8	0.0652504	0.000349	0.00010742			63.8	0.14187		-7.3242e-06			63.8	4.2725e-05												63.8	0.783	0.96904	1.022
			63.9	0.00021729	0.00020386				63.9	0.0157104		0.0160767			63.9	0.0652504	0.00035	0.00010864			63.9	0.149336		-7.3242e-06			63.9	4.2725e-05												63.9	0.775824	0.982825	1.02918
			64	0.00021606	0.00020386				64	0.0156982		0.0161133			64	0.0652504	0.000352	0.00010742			64	0.14187		-6.1035e-06			64	4.1504e-05												64	0.783	0.982825	1.02918
			64.1	0.00021606	0.0002063				64.1	0.0157104		0.0160767			64.1	0.0652504	0.000352	0.00010742			64.1	0.14187		-7.3242e-06			64.1	4.3945e-05												64.1	0.783	0.982825	1.02918
			64.2	0.00021729	0.0002063				64.2	0.015625		0.0161255			64.2	0.0652504	0.00035	0.00010742			64.2	0.134404		-6.1035e-06			64.2	4.2725e-05												64.2	0.783	0.975932	1.02918
			64.3	0.00021729	0.00020752				64.3	0.0155518		0.0161377			64.3	0.0745068	0.000353	0.0001062			64.3	0.14187		-6.1035e-06			64.3	4.2725e-05												64.3	0.775824	0.989718	1.01482
			64.4	0.00021606	0.00020752				64.4	0.0155518		0.0161133			64.4	0.0652504	0.00035	0.0001062			64.4	0.149336		-6.1035e-06			64.4	4.2725e-05												64.4	0.790176	0.989718	1.00765
			64.5	0.00021606	0.00020752				64.5	0.0156128		0.0161499			64.5	0.0745068	0.00035	0.00010742			64.5	0.134404		-6.1035e-06			64.5	4.3945e-05												64.5	0.797353	0.982825	1.022
			64.6	0.00021729	0.00020996				64.6	0.0156128		0.0161499			64.6	0.0652504	0.00035	0.00010864			64.6	0.14187		-7.3242e-06			64.6	4.3945e-05												64.6	0.790176	0.975932	1.022
			64.7	0.00021729	0.00021118				64.7	0.0155884		0.0161377			64.7	0.0745068	0.000352	0.00010742			64.7	0.149336		-7.3242e-06			64.7	4.2725e-05												64.7	0.775824	0.989718	1.022
			64.8	0.00021729	0.00021362				64.8	0.0155518		0.0161133			64.8	0.0652504	0.00035	0.0001062			64.8	0.14187		-6.1035e-06			64.8	4.1504e-05												64.8	0.790176	0.989718	1.022
			64.9	0.00021729	0.00021362				64.9	0.0155518		0.0161377			64.9	0.0652504	0.00035	0.00010742			64.9	0.14187		-6.1035e-06			64.9	4.2725e-05												64.9	0.790176	0.989718	1.022
			65	0.00021729	0.00021362				65	0.0155151		0.0161499			65	0.0745068	0.000352	0.00010864			65	0.14187		-7.3242e-06			65	4.5166e-05												65	0.797353	0.982825	1.022
			65.1	0.00021606	0.00021362				65.1	0.0155884		0.0161133			65.1	0.0652504	0.000349	0.00010864			65.1	0.14187		-7.3242e-06			65.1	4.3945e-05												65.1	0.790176	0.989718	1.022
			65.2	0.00021729	0.0002124				65.2	0.0155884		0.0161865			65.2	0.0652504	0.000352	0.00010742			65.2	0.14187		-7.3242e-06			65.2	4.2725e-05												65.2	0.790176	0.989718	1.022
			65.3	0.00021606	0.00021484				65.3	0.0156128		0.0161621			65.3	0.0837633	0.000352	0.00010742			65.3	0.14187		-6.1035e-06			65.3	4.2725e-05												65.3	0.790176	0.99661	1.022
			65.4	0.00021729	0.00021606				65.4	0.0156372		0.0161865			65.4	0.0745068	0.00035	0.00010742			65.4	0.134404		-6.1035e-06			65.4	4.2725e-05												65.4	0.797353	0.982825	1.01482
			65.5	0.00021606	0.00021606				65.5	0.0156372		0.0161499			65.5	0.0745068	0.00035	0.00010864			65.5	0.134404		-6.1035e-06			65.5	4.3945e-05												65.5	0.804529	1.0035	1.022
			65.6	0.00021729	0.00021606				65.6	0.0155762		0.0161743			65.6	0.0652504	0.000352	0.00010742			65.6	0.14187		-6.1035e-06			65.6	4.3945e-05												65.6	0.818882	0.99661	1.01482
			65.7	0.00021729	0.00021484				65.7	0.0156372		0.0161133			65.7	0.0745068	0.00035	0.00010742			65.7	0.14187		-6.1035e-06			65.7	4.3945e-05												65.7	0.840471	0.99661	1.022
			65.8	0.00021851	0.00021484				65.8	0.0155762		0.0162476			65.8	0.0745068	0.000352	0.00010742			65.8	0.14187		-6.1035e-06			65.8	4.2725e-05												65.8	0.833235	0.982825	1.022
			65.9	0.00021606	0.00021606				65.9	0.015564		0.0162109			65.9	0.0837633	0.000352	0.00010742			65.9	0.134404		-6.1035e-06			65.9	4.2725e-05												65.9	0.847647	0.982825	1.022
			66	0.00021606	0.00021729				66	0.0155273		0.0161865			66	0.0837633	0.000353	0.00010742			66	0.14187		-6.1035e-06			66	4.3945e-05												66	0.862	0.99661	1.01482
			66.1	0.00021729	0.00021606				66.1	0.015564		0.0161743			66.1	0.0745068	0.000359	0.0001062			66.1	0.14187		-7.3242e-06			66.1	4.3945e-05												66.1	0.912235	0.99661	1.022
			66.2	0.00021729	0.00021729				66.2	0.0155396		0.0161377			66.2	0.0745068	0.000366	0.0001062			66.2	0.14187		-7.3242e-06			66.2	4.2725e-05												66.2	0.940941	0.989718
			66.3	0.00021484	0.00021729				66.3	0.0155762		0.0160645			66.3	0.0745068	0.000377	0.00010742			66.3	0.14187		-7.3242e-06			66.3	4.2725e-05												66.3	0.955353	0.982825
			66.4	0.00021606	0.00021729				66.4	0.0155884		0.0161987			66.4	0.0745068	0.000391	0.00010742			66.4	0.14187		-6.1035e-06			66.4	4.3945e-05												66.4	0.976882	0.99661
			66.5	0.00021606	0.00021606				66.5	0.015625		0.0161255			66.5	0.0837633	0.000399	0.00010742			66.5	0.149336		-6.1035e-06			66.5	4.2725e-05												66.5	1.00559	1.0035
			66.6	0.00021729	0.00021729				66.6	0.0156128		0.0161133			66.6	0.0837633	0.000409	0.00010864			66.6	0.14187		-6.1035e-06			66.6	4.3945e-05												66.6	1.01276	0.99661
			66.7	0.00021729	0.00021729				66.7	0.0156128		0.0161011			66.7	0.0745068	0.000419	0.00010742			66.7	0.134404		-4.8828e-06			66.7	4.3945e-05												66.7	1.01276	1.0035
			66.8	0.00021606	0.00021851				66.8	0.0155273		0.0161499			66.8	0.0745068	0.000428	0.00010864			66.8	0.14187		-6.1035e-06			66.8	4.3945e-05												66.8	1.01994	0.99661
			66.9	0.00021729	0.00021729				66.9	0.0154907		0.0160889			66.9	0.0745068	0.000437	0.00010742			66.9	0.14187		-7.3242e-06			66.9	4.3945e-05												66.9	0.998412	1.0104
			67	0.00021729	0.00021729				67	0.0154907		0.01604			67	0.0745068	0.000438	0.00010742			67	0.149336		-6.1035e-06			67	4.2725e-05												67	0.984059	1.0035
			67.1	0.00021729	0.00021729				67.1	0.0155273		0.0160522			67.1	0.0745068	0.000442	0.00010742			67.1	0.14187		-6.1035e-06			67.1	4.3945e-05												67.1	0.976882	1.0035
			67.2	0.00021729	0.00021851				67.2	0.0155518		0.0161133			67.2	0.0745068	0.000446	0.00010742			67.2	0.149336		-6.1035e-06			67.2	4.2725e-05												67.2	0.955353	1.0104
			67.3	0.00021606	0.00021729				67.3	0.0155518		0.0161743			67.3	0.0745068	0.000448	0.00010742			67.3	0.149336		-7.3242e-06			67.3	4.3945e-05												67.3	0.962529	1.0104
			67.4	0.00021729	0.00021729				67.4	0.0155273		0.0162109			67.4	0.0652504	0.000449	0.0001062			67.4	0.149336		-7.3242e-06			67.4	4.3945e-05												67.4	0.969706	1.01729
			67.5	0.00021851	0.00021851				67.5	0.0155518		0.0161621			67.5	0.0745068	0.000453	0.0001062			67.5	0.149336		-4.8828e-06			67.5	4.2725e-05												67.5	0.962529	1.0104
			67.6		0.00021851				67.6	0.015564		0.0161377			67.6	0.0652504	0.000453	0.0001062			67.6	0.14187		-6.1035e-06			67.6	4.3945e-05												67.6	0.948176	1.0104
			67.7		0.00021851				67.7	0.0155518		0.0161377			67.7	0.0745068	0.000452	0.00010742			67.7	0.14187		-6.1035e-06			67.7	4.3945e-05												67.7	0.933765	1.0104
			67.8		0.00021729				67.8	0.0155396		0.0161377			67.8	0.0745068	0.000454	0.00010742			67.8	0.149336		-7.3242e-06			67.8	4.3945e-05												67.8	0.940941	1.01729
			67.9		0.00021729				67.9	0.0155396		0.0162231			67.9	0.0652504	0.000453	0.0001062			67.9	0.149336		-6.1035e-06			67.9	4.3945e-05												67.9	0.933765	1.0104
			68		0.00021851				68	0.0155273		0.0161865			68	0.0652504	0.00045	0.00010742			68	0.14187		-4.8828e-06			68	4.3945e-05												68	0.962529	1.0104
			68.1		0.00021851				68.1	0.0155396		0.0161865			68.1	0.0745068	0.000449	0.00010742			68.1	0.14187		-6.1035e-06			68.1	4.2725e-05												68.1	0.955353	1.0035
			68.2		0.00021729				68.2	0.0156006		0.0161743			68.2	0.0745068	0.000448	0.00010742			68.2	0.14187		-6.1035e-06			68.2	4.6387e-05												68.2	0.955353	1.0104
			68.3		0.00021851				68.3	0.015564		0.0161987			68.3	0.0652504	0.000447	0.0001062			68.3	0.149336		-6.1035e-06			68.3	4.3945e-05												68.3	0.955353	1.0035
			68.4		0.00021851				68.4	0.0155518		0.0161743			68.4	0.0745068	0.000447	0.00010498			68.4	0.149336		-6.1035e-06			68.4	4.3945e-05												68.4	0.962529	1.0104
			68.5		0.00021973				68.5	0.0155762		0.0161499			68.5	0.0745068	0.000447	0.0001062			68.5	0.149336		-6.1035e-06			68.5	4.3945e-05												68.5	0.969706	1.0035
			68.6		0.00021973				68.6	0.0155396		0.0161377			68.6	0.0745068	0.000447	0.00010742			68.6	0.149336		-6.1035e-06			68.6	4.3945e-05												68.6	0.976882	1.0104
			68.7		0.00021851				68.7	0.0155029		0.0161377			68.7	0.0745068	0.000447	0.00010742			68.7	0.149336		-4.8828e-06			68.7	4.3945e-05												68.7	0.998412	1.0104
			68.8		0.00021851				68.8	0.0155273		0.0162354			68.8	0.0745068	0.000448	0.0001062			68.8	0.149336		-6.1035e-06			68.8	4.3945e-05												68.8	1.00559	1.0035
			68.9		0.00021851				68.9	0.0155273					68.9	0.0837633	0.000448	0.00010742			68.9	0.149336		-4.8828e-06			68.9	4.3945e-05												68.9	0.991235	1.0035
			69		0.00022095				69	0.0155518					69	0.0837633	0.000447	0.00010742			69	0.149336		-7.3242e-06			69	4.3945e-05												69	0.998412	1.0035
			69.1		0.00021973				69.1	0.0155396					69.1	0.0745068	0.000448	0.00010864			69.1	0.14187		-4.8828e-06			69.1	4.6387e-05												69.1	0.998412	0.989718
			69.2		0.00021973				69.2	0.0155151					69.2	0.0745068	0.000449	0.00010742			69.2	0.14187		-6.1035e-06			69.2	4.3945e-05												69.2	0.998412	1.0035
			69.3		0.00021973				69.3	0.0154907					69.3	0.0745068	0.000449	0.00010742			69.3	0.14187		-4.8828e-06			69.3	4.2725e-05												69.3	0.991235	0.99661
			69.4		0.00022095				69.4	0.0155884					69.4	0.0745068	0.000449	0.00010742			69.4	0.149336		-6.1035e-06			69.4	4.3945e-05												69.4	1.00559	0.99661
			69.5		0.00022095				69.5	0.0155518					69.5	0.0745068	0.00045	0.00010742			69.5	0.149336		-7.3242e-06			69.5	4.3945e-05												69.5	0.998412	1.0035
			69.6		0.00021973				69.6	0.0155884					69.6	0.0745068	0.000452	0.00010864			69.6	0.149336		-6.1035e-06			69.6	4.2725e-05												69.6	0.998412	0.99661
			69.7		0.00021973				69.7	0.0156128					69.7	0.0837633	0.00045	0.00010742			69.7	0.156802		-6.1035e-06			69.7	4.3945e-05												69.7	0.998412	1.0104
			69.8		0.00022095				69.8	0.0156006					69.8	0.0745068	0.000453	0.00010742			69.8	0.149336		-6.1035e-06			69.8	4.3945e-05												69.8	0.998412	0.99661
			69.9		0.00022095				69.9	0.0155273					69.9	0.0745068	0.00045	0.00010742			69.9	0.14187		-6.1035e-06			69.9	4.5166e-05												69.9	1.00559	1.0035
			70		0.00022095				70	0.0156128					70	0.0837633	0.000454	0.00010864			70	0.149336		-7.3242e-06			70	4.5166e-05												70	1.00559	0.99661
			70.1		0.00022095										70.1	0.0745068	0.000453	0.00010742			70.1	0.149336		-6.1035e-06			70.1	4.3945e-05												70.1		0.99661
			70.2		0.00022095										70.2	0.0745068	0.000452	0.00010742			70.2	0.149336		-6.1035e-06			70.2	4.2725e-05												70.2		0.99661
			70.3		0.00022217										70.3	0.0745068	0.000452	0.00010742			70.3	0.14187		-4.8828e-06			70.3	4.3945e-05												70.3		1.0104
			70.4		0.00021973										70.4	0.0745068	0.000452	0.0001062			70.4	0.14187		-6.1035e-06			70.4	4.3945e-05												70.4		1.0035
			70.5		0.00021973										70.5	0.0745068	0.000452	0.0001062			70.5	0.156802		-4.8828e-06			70.5	4.5166e-05												70.5		0.989718
			70.6		0.00022217										70.6	0.0745068	0.000453	0.0001062			70.6	0.149336		-4.8828e-06			70.6	4.3945e-05												70.6		1.0035
			70.7		0.00022217										70.7	0.0745068	0.000452	0.0001062			70.7	0.149336		-6.1035e-06			70.7	4.3945e-05												70.7		1.0035
			70.8		0.00022095										70.8	0.0837633	0.000452	0.0001062			70.8	0.14187		-6.1035e-06			70.8	4.5166e-05												70.8		1.01729
			70.9		0.00022095										70.9	0.0837633	0.000452	0.00010742			70.9	0.149336		-4.8828e-06			70.9	4.5166e-05												70.9		1.01729
			71		0.00022095										71	0.0930197	0.000453	0.0001062			71	0.156802		-4.8828e-06			71	4.3945e-05												71		1.02418
			71.1		0.00022217										71.1	0.0745068	0.000452	0.0001062			71.1	0.149336		-6.1035e-06			71.1	4.3945e-05												71.1		1.0104
			71.2		0.00022217										71.2	0.0837633	0.000452	0.00010742			71.2	0.149336		-6.1035e-06			71.2	4.5166e-05												71.2		1.0104
			71.3		0.00022095										71.3	0.0837633	0.000454	0.0001062			71.3	0.149336		-6.1035e-06			71.3	4.5166e-05												71.3		1.0104
			71.4		0.00022217										71.4	0.0930197	0.000453	0.0001062			71.4	0.149336		-6.1035e-06			71.4	4.5166e-05												71.4		1.0035
			71.5		0.00022217										71.5	0.0837633	0.000452	0.00010742			71.5	0.149336		-4.8828e-06			71.5	4.3945e-05												71.5		1.0035
			71.6		0.00022217										71.6	0.0745068	0.000452	0.0001062			71.6	0.149336		-4.8828e-06			71.6	4.5166e-05												71.6		1.0104
			71.7		0.00022217										71.7	0.0745068	0.000453	0.00010742			71.7	0.156802		-6.1035e-06			71.7	4.5166e-05												71.7		1.0035
			71.8		0.00022095										71.8	0.0930197	0.000453	0.00010742			71.8	0.149336		-6.1035e-06			71.8	4.3945e-05												71.8		0.99661
			71.9		0.00022095										71.9	0.0837633	0.000453	0.00010742			71.9	0.156802		-7.3242e-06			71.9	4.5166e-05												71.9		1.0104
			72		0.00022217										72	0.0837633	0.000453	0.0001062			72	0.14187		-4.8828e-06			72	4.5166e-05												72		1.0035
			72.1		0.00022339										72.1	0.0745068	0.00045	0.0001062			72.1	0.156802		-4.8828e-06			72.1	4.5166e-05												72.1		1.0035
			72.2		0.00022217										72.2	0.0837633	0.000452	0.00010742			72.2	0.149336		-4.8828e-06			72.2	4.5166e-05												72.2		0.99661
			72.3		0.00022217										72.3	0.0837633	0.000454	0.0001062			72.3	0.156802		-6.1035e-06			72.3	4.2725e-05												72.3		1.0104
			72.4		0.00022095										72.4	0.0837633	0.000452	0.0001062			72.4	0.149336		-4.8828e-06			72.4	4.3945e-05												72.4		0.99661
			72.5		0.00022095										72.5	0.0745068	0.000452	0.0001062			72.5	0.14187		-4.8828e-06			72.5	4.5166e-05												72.5		1.0035
			72.6		0.00022095										72.6	0.0837633	0.000453	0.00010742			72.6	0.149336		-6.1035e-06			72.6	4.5166e-05												72.6		1.0035
			72.7		0.00022095										72.7	0.0837633	0.000453	0.00010742			72.7	0.149336		-4.8828e-06			72.7	4.5166e-05												72.7		1.01729
			72.8		0.00022217										72.8	0.0837633	0.000452	0.00010742			72.8	0.149336		-4.8828e-06			72.8	4.3945e-05												72.8		1.0104
			72.9		0.00022217										72.9	0.0837633	0.000452	0.0001062			72.9	0.149336		-4.8828e-06			72.9	4.3945e-05												72.9		1.0035
			73		0.00022217										73	0.0837633	0.000453	0.0001062			73	0.14187		-4.8828e-06			73	4.3945e-05												73		1.0035
			73.1		0.00022217										73.1	0.0837633	0.000453	0.00010742			73.1	0.149336		-6.1035e-06			73.1	4.5166e-05												73.1		1.0104
			73.2		0.00022217										73.2	0.0837633	0.000453	0.0001062			73.2	0.149336		-6.1035e-06			73.2	4.5166e-05												73.2		1.0035
			73.3		0.00022217										73.3	0.0745068	0.000452	0.00010498			73.3	0.156802		-6.1035e-06			73.3	4.3945e-05												73.3		0.99661
			73.4		0.00022339										73.4	0.0837633	0.000453	0.0001062			73.4	0.149336		-6.1035e-06			73.4	4.3945e-05												73.4		0.99661
			73.5		0.00022095										73.5	0.0837633	0.000452	0.0001062			73.5	0.156802		-4.8828e-06			73.5	4.3945e-05												73.5		1.0035
			73.6		0.00022217										73.6	0.0837633	0.000453	0.00010742			73.6	0.156802		-7.3242e-06			73.6	4.8828e-05												73.6		1.0035
			73.7		0.00022217										73.7	0.0745068	0.000452	0.0001062			73.7	0.149336		-6.1035e-06			73.7	6.5918e-05												73.7		0.99661
			73.8		0.00022217										73.8	0.0745068	0.000453	0.0001062			73.8	0.149336		-4.8828e-06			73.8	9.1553e-05												73.8		1.0035
			73.9		0.00022217										73.9	0.0745068	0.000453	0.0001062			73.9	0.156802		-4.8828e-06			73.9	0.00010864												73.9		1.0035
			74		0.00022217										74	0.0745068	0.000452	0.0001062			74	0.156802		-6.1035e-06			74	0.00010986												74		1.0104
			74.1		0.00022217										74.1	0.0837633	0.000452	0.0001062			74.1	0.149336		-3.6621e-06			74.1	0.00010864												74.1		1.0104
			74.2		0.00022217										74.2	0.0837633	0.000452	0.0001062			74.2	0.149336		-4.8828e-06			74.2	0.0001062												74.2		0.99661
			74.3		0.00022217										74.3	0.0745068	0.000453	0.0001062			74.3	0.149336		-6.1035e-06			74.3	0.00010864												74.3		1.0104
			74.4		0.00022217										74.4	0.0745068	0.000453	0.00010742			74.4	0.149336		-6.1035e-06			74.4	0.00011353												74.4		1.0035
			74.5		0.00022095										74.5	0.0837633	0.000453	0.0001062			74.5	0.156802		-4.8828e-06			74.5	0.00011963												74.5		0.99661
			74.6		0.00022217										74.6	0.0745068	0.000454	0.0001062			74.6	0.156802		-4.8828e-06			74.6	0.00012085												74.6		1.0035
			74.7		0.00022217										74.7	0.0745068	0.000452	0.00010498			74.7	0.149336		-6.1035e-06			74.7	0.00011719												74.7		1.01729
			74.8		0.00022217										74.8	0.0745068	0.000453	0.0001062			74.8	0.149336		-6.1035e-06			74.8	0.00011597												74.8		1.0104
			74.9		0.00022217										74.9	0.0837633	0.000453	0.0001062			74.9	0.14187		-4.8828e-06			74.9	0.00011719												74.9		1.0035
			75		0.00022339										75	0.0837633	0.000452	0.0001062			75	0.156802		-4.8828e-06			75	0.00011353												75		1.0035
			75.1		0.00022217										75.1	0.0745068	0.000453	0.0001062			75.1	0.156802		-6.1035e-06			75.1	0.00011353
			75.2		0.00022217										75.2	0.0745068	0.000452	0.00010742			75.2	0.156802		-6.1035e-06			75.2	0.00011475
			75.3		0.00022217										75.3	0.0837633	0.000453	0.00010742			75.3	0.149336		-6.1035e-06			75.3	0.00011597
			75.4		0.00022217										75.4	0.0837633	0.000453	0.00010498			75.4	0.156802		-6.1035e-06			75.4	0.00011597
			75.5		0.00022339										75.5	0.0837633	0.000453	0.0001062			75.5	0.156802		-4.8828e-06			75.5	0.00012329
			75.6		0.00022339										75.6	0.0837633	0.000453	0.00010742			75.6	0.149336		-6.1035e-06			75.6	0.00013184
			75.7		0.00022095										75.7	0.0745068	0.000453	0.00010742			75.7	0.156802		-6.1035e-06			75.7	0.00013794
			75.8		0.00022217										75.8	0.0837633	0.000453	0.00010742			75.8	0.156802		-3.6621e-06			75.8	0.00014404
			75.9		0.00022339										75.9	0.0837633	0.000452	0.0001062			75.9	0.156802		-6.1035e-06			75.9	0.00015137
			76		0.00022339										76	0.0837633	0.000452	0.0001062			76	0.156802		-4.8828e-06			76	0.00015869
			76.1		0.00022461										76.1	0.0837633	0.000453	0.0001062			76.1	0.149336		-6.1035e-06			76.1	0.00016235
			76.2		0.00022339										76.2	0.0930197	0.000453	0.00010742			76.2	0.149336		-6.1035e-06			76.2	0.00016479
			76.3		0.00022217										76.3	0.0837633	0.000452	0.0001062			76.3	0.149336		-4.8828e-06			76.3	0.00016357
			76.4		0.00022217										76.4	0.0745068	0.000453	0.0001062			76.4	0.149336		-4.8828e-06			76.4	0.00016113
			76.5		0.00022339										76.5	0.0745068	0.000453	0.00010742			76.5	0.156802		-6.1035e-06			76.5	0.00016357
			76.6		0.00022339										76.6	0.0745068	0.000452				76.6	0.14187		-6.1035e-06			76.6	0.00016235
			76.7		0.00022339										76.7	0.0930197	0.000453				76.7	0.149336		-4.8828e-06			76.7	0.00016357
			76.8		0.00022339										76.8	0.0837633	0.000453				76.8	0.156802		-4.8828e-06			76.8	0.00016357
			76.9		0.00022217										76.9	0.0745068	0.00045				76.9	0.156802		-4.8828e-06			76.9	0.00016602
			77		0.00022461										77	0.0837633	0.000453				77	0.149336		-4.8828e-06			77	0.00016846
			77.1		0.00022339										77.1	0.0837633	0.000453				77.1	0.164269		-4.8828e-06			77.1	0.00016846
			77.2		0.00022095										77.2	0.0745068	0.000452				77.2	0.156802		-3.6621e-06			77.2	0.00016846
			77.3		0.00022217										77.3	0.0745068	0.00045				77.3	0.149336		-3.6621e-06			77.3	0.00016724
			77.4		0.00022217										77.4	0.0837633	0.000454				77.4	0.149336		-4.8828e-06			77.4	0.00016968
			77.5		0.00022217										77.5	0.0930197	0.000455				77.5	0.156802		-6.1035e-06			77.5	0.00016968
			77.6		0.00022217										77.6	0.0745068	0.000454				77.6	0.156802		-4.8828e-06			77.6	0.0001709
			77.7		0.00022461										77.7	0.0837633	0.000453				77.7	0.149336		-4.8828e-06			77.7	0.0001709
			77.8		0.00022583										77.8	0.0837633	0.000454				77.8	0.149336		-4.8828e-06			77.8	0.00017334
			77.9		0.00022339										77.9	0.0745068	0.000455				77.9	0.156802		-6.1035e-06			77.9	0.00017456
			78		0.00022339										78	0.0837633	0.000453				78	0.156802		-4.8828e-06			78	0.00017578
															78.1	0.0745068	0.000453				78.1	0.149336		-3.6621e-06			78.1	0.00017456
															78.2	0.0745068	0.000454				78.2	0.149336		-4.8828e-06			78.2	0.00017578
															78.3	0.0837633	0.000454				78.3	0.149336		-4.8828e-06			78.3	0.00017578
															78.4	0.0837633	0.000455				78.4	0.149336		-6.1035e-06			78.4	0.00017578
															78.5	0.0930197	0.000455				78.5	0.156802		-4.8828e-06			78.5	0.000177
															78.6	0.0837633	0.000454				78.6	0.149336		-4.8828e-06			78.6	0.00017578
															78.7	0.0837633	0.000454				78.7	0.149336		-4.8828e-06			78.7	0.000177
															78.8	0.0930197	0.000454				78.8	0.164269		-4.8828e-06			78.8	0.000177
															78.9	0.0930197	0.000455				78.9	0.149336		-4.8828e-06			78.9	0.00017456
															79	0.0837633	0.000453				79	0.156802		-4.8828e-06			79	0.00017334
															79.1	0.0837633	0.000454				79.1	0.149336		-6.1035e-06			79.1	0.00017334
															79.2	0.0837633	0.000454				79.2	0.149336		-6.1035e-06			79.2	0.00017456
															79.3	0.0837633	0.000455				79.3	0.156802		-4.8828e-06			79.3	0.00017456
															79.4	0.0837633	0.000454				79.4	0.156802		-4.8828e-06			79.4	0.00017456
															79.5	0.0745068	0.000453				79.5	0.149336		-3.6621e-06			79.5	0.00017578
															79.6	0.0745068	0.000454				79.6	0.149336		-4.8828e-06			79.6	0.000177
															79.7	0.0837633	0.000455				79.7	0.156802		-4.8828e-06			79.7	0.000177
															79.8	0.0745068	0.000454				79.8	0.156802		-3.6621e-06			79.8	0.00017578
															79.9	0.0837633	0.000454				79.9	0.156802		-3.6621e-06			79.9	0.000177
															80	0.0837633	0.000455				80	0.156802		-2.4414e-06			80	0.00017822
															80.1	0.0837633	0.000455				80.1	0.156802		-3.6621e-06			80.1	0.00017822
															80.2	0.0837633	0.000455				80.2	0.164269		-4.8828e-06			80.2	0.000177
															80.3	0.0837633	0.000454				80.3	0.164269		-4.8828e-06			80.3	0.00017822
															80.4	0.0837633	0.000454				80.4	0.156802		-4.8828e-06			80.4	0.000177
															80.5	0.0837633	0.000454				80.5	0.149336		-4.8828e-06			80.5	0.00017944
															80.6	0.0837633	0.000454				80.6	0.156802		-3.6621e-06			80.6	0.00017822
															80.7	0.0837633	0.000454				80.7	0.156802		-4.8828e-06			80.7	0.000177
															80.8	0.0837633	0.000454				80.8	0.156802		-4.8828e-06			80.8	0.00017822
															80.9	0.0837633	0.000454				80.9	0.149336		-4.8828e-06			80.9	0.000177
															81	0.0930197	0.000454				81	0.156802		-4.8828e-06			81	0.00017944
															81.1	0.0837633	0.000453				81.1	0.164269		-4.8828e-06			81.1	0.00017822
															81.2	0.0837633	0.000454				81.2	0.156802		-4.8828e-06			81.2	0.00017822
															81.3	0.0837633	0.000454				81.3	0.156802		-6.1035e-06			81.3	0.00017822
															81.4	0.0930197	0.000454				81.4	0.149336		-4.8828e-06			81.4	0.000177
															81.5	0.0837633	0.000454				81.5	0.156802		-4.8828e-06			81.5	0.00017822
															81.6	0.0837633	0.000453				81.6	0.156802		-4.8828e-06			81.6	0.00017578
															81.7	0.0837633	0.000455				81.7	0.156802		-4.8828e-06			81.7	0.00017822
															81.8	0.0837633	0.000457				81.8	0.156802		-4.8828e-06			81.8	0.000177
															81.9	0.0837633	0.000455				81.9	0.156802		-4.8828e-06			81.9	0.00017822
															82	0.0837633	0.000454				82	0.156802		-3.6621e-06			82	0.00017822
															82.1	0.0837633	0.000454				82.1	0.149336		-3.6621e-06			82.1	0.000177
															82.2	0.0745068	0.000455				82.2	0.149336		-2.4414e-06			82.2	0.000177
															82.3	0.0837633	0.000454				82.3	0.156802		-3.6621e-06			82.3	0.00017944
															82.4	0.0837633	0.000457				82.4	0.156802		-3.6621e-06			82.4	0.00017944
															82.5	0.0837633	0.000454				82.5	0.164269		-2.4414e-06			82.5	0.00017944
															82.6	0.0837633	0.000454				82.6	0.156802		-2.4414e-06			82.6	0.00017944
															82.7	0.0837633	0.000455				82.7	0.156802		-3.6621e-06			82.7	0.00017822
															82.8	0.0930197	0.000454				82.8	0.164269		-4.8828e-06			82.8	0.00017822
															82.9	0.0837633					82.9	0.164269		-3.6621e-06			82.9	0.00017822
															83	0.0837633					83	0.171735		-2.4414e-06			83	0.00017822
															83.1	0.0837633					83.1	0.164269		-3.6621e-06			83.1	0.00017822
															83.2	0.0745068					83.2	0.156802		-4.8828e-06			83.2	0.00017944
															83.3	0.0837633					83.3	0.156802		-3.6621e-06			83.3	0.00017944
															83.4	0.0837633					83.4	0.156802		-3.6621e-06			83.4	0.00017944
															83.5	0.0930197					83.5	0.156802		-2.4414e-06			83.5	0.00017822
															83.6	0.0837633					83.6	0.164269		-3.6621e-06			83.6	0.00017944
															83.7	0.0837633					83.7	0.156802		-2.4414e-06			83.7	0.00017944
															83.8	0.0837633					83.8	0.156802		-2.4414e-06			83.8	0.00017822
															83.9	0.0930197					83.9	0.156802		-3.6621e-06			83.9	0.000177
															84	0.0930197					84	0.156802		-3.6621e-06			84	0.00017456
															84.1	0.102276					84.1	0.156802		-4.8828e-06			84.1	0.00017334
															84.2	0.0930197					84.2	0.156802		-2.4414e-06			84.2	0.00017334
															84.3	0.102276					84.3	0.149336		-3.6621e-06			84.3	0.00017456
															84.4	0.102276					84.4	0.156802		-3.6621e-06			84.4	0.00017578
															84.5	0.0837633					84.5	0.156802		-3.6621e-06			84.5	0.000177
															84.6	0.0930197					84.6	0.156802		-4.8828e-06			84.6	0.000177
															84.7	0.0930197					84.7	0.156802		-2.4414e-06			84.7	0.000177
															84.8	0.0837633					84.8	0.156802		-3.6621e-06			84.8	0.00017944
															84.9	0.0837633					84.9	0.156802		-3.6621e-06			84.9	0.00017822
															85	0.0837633					85	0.164269		-3.6621e-06			85	0.00017944
															85.1	0.0837633					85.1	0.164269		-2.4414e-06			85.1	0.00017822
															85.2	0.0930197					85.2	0.171735		-2.4414e-06			85.2	0.00017822
															85.3	0.0930197					85.3	0.164269		-4.8828e-06			85.3	0.00017944
															85.4	0.0930197					85.4	0.164269		-4.8828e-06			85.4	0.00018066
															85.5	0.0930197					85.5	0.171735		-2.4414e-06			85.5	0.00017822
															85.6	0.0930197					85.6	0.171735		-2.4414e-06			85.6	0.000177
															85.7	0.0930197					85.7	0.164269		-3.6621e-06			85.7	0.00017822
															85.8	0.0930197					85.8	0.156802		-3.6621e-06			85.8	0.00017944
															85.9	0.0930197					85.9	0.164269		-2.4414e-06			85.9	0.00018066
															86	0.0930197					86	0.171735		-2.4414e-06			86	0.00017944
															86.1	0.0930197					86.1	0.164269		-3.6621e-06			86.1	0.00018066
															86.2	0.0930197					86.2	0.156802		-3.6621e-06			86.2	0.00017944
															86.3	0.0930197					86.3	0.164269		-3.6621e-06			86.3	0.00017944
															86.4	0.102276					86.4	0.164269		-3.6621e-06			86.4	0.00017944
															86.5	0.102276					86.5	0.171735		-3.6621e-06			86.5	0.00017944
															86.6	0.111533					86.6	0.164269		-3.6621e-06			86.6	0.00017944
															86.7	0.102276					86.7	0.171735		-4.8828e-06			86.7	0.00018066
															86.8	0.102276					86.8	0.171735		-2.4414e-06			86.8	0.00017822
															86.9	0.0930197					86.9	0.164269		-3.6621e-06			86.9	0.00018066
															87	0.102276					87	0.164269		-4.8828e-06			87	0.00017822
															87.1	0.111533					87.1	0.156802		-3.6621e-06			87.1	0.00018066
															87.2	0.102276					87.2	0.171735		-3.6621e-06			87.2	0.00017944
															87.3	0.102276					87.3	0.164269		-2.4414e-06			87.3	0.00017944
															87.4	0.102276					87.4	0.164269		-3.6621e-06			87.4	0.00017944
															87.5	0.102276					87.5	0.164269		-2.4414e-06			87.5	0.00018066
															87.6	0.102276					87.6	0.156802		-2.4414e-06			87.6	0.00017944
															87.7	0.111533					87.7	0.171735		-3.6621e-06			87.7	0.00017944
															87.8	0.111533					87.8	0.164269		-3.6621e-06			87.8	0.00017944
															87.9	0.0930197					87.9	0.164269		-2.4414e-06			87.9	0.00017822
															88	0.102276					88	0.164269		-3.6621e-06			88	0.00017822
															88.1	0.102276					88.1	0.171735		-3.6621e-06			88.1	0.00018066
															88.2	0.102276					88.2	0.171735		-3.6621e-06			88.2	0.00017822
															88.3	0.0930197					88.3	0.156802		-2.4414e-06			88.3	0.00017822
															88.4	0.102276					88.4	0.156802		-4.8828e-06			88.4	0.00017944
															88.5	0.102276					88.5	0.171735		-3.6621e-06			88.5	0.00017944
															88.6	0.102276					88.6	0.171735		-3.6621e-06			88.6	0.00017822
															88.7	0.102276					88.7	0.164269		-2.4414e-06			88.7	0.00017822
															88.8	0.0930197					88.8	0.164269		-3.6621e-06			88.8	0.00017822
															88.9	0.0930197					88.9	0.171735		-3.6621e-06			88.9	0.00018066
															89	0.102276					89	0.171735		-3.6621e-06			89	0.00018066
															89.1	0.102276					89.1	0.164269		-2.4414e-06			89.1	0.00017944
															89.2	0.102276					89.2	0.164269		-3.6621e-06			89.2	0.00017822
															89.3	0.0930197					89.3	0.164269		-3.6621e-06			89.3	0.00017944
															89.4	0.102276					89.4	0.164269		-2.4414e-06			89.4	0.00017944
															89.5	0.0930197					89.5	0.164269		-1.2207e-06			89.5	0.00017822
															89.6	0.102276					89.6	0.164269		-2.4414e-06			89.6	0.00017944
															89.7	0.102276					89.7	0.156802		-2.4414e-06			89.7	0.00017944
															89.8	0.0930197					89.8	0.171735		-2.4414e-06			89.8	0.00018066
															89.9	0.102276					89.9	0.164269		-1.2207e-06			89.9	0.00017944
															90	0.102276					90	0.156802		-1.2207e-06			90	0.00017944
															90.1	0.111533					90.1	0.164269		-2.4414e-06			90.1	0.00017822
															90.2	0.102276					90.2	0.164269		-3.6621e-06			90.2	0.00017944
															90.3	0.102276					90.3	0.171735		-2.4414e-06			90.3	0.00017944
															90.4	0.102276					90.4	0.164269		-3.6621e-06			90.4	0.00017944
															90.5	0.0930197					90.5	0.171735		-3.6621e-06			90.5	0.00017944
															90.6	0.0930197					90.6	0.171735		-2.4414e-06			90.6	0.00017944
															90.7	0.0930197					90.7	0.164269		-3.6621e-06			90.7	0.00017944
															90.8	0.102276					90.8	0.164269		-2.4414e-06			90.8	0.00017944
															90.9	0.102276					90.9	0.171735		-2.4414e-06			90.9	0.00017944
															91	0.102276					91	0.164269		-3.6621e-06			91	0.00017944
															91.1	0.111533					91.1	0.164269		-3.6621e-06			91.1	0.00017944
															91.2	0.102276					91.2	0.164269		-2.4414e-06			91.2	0.00017944
															91.3	0.102276					91.3	0.171735		-3.6621e-06			91.3	0.00017944
															91.4	0.0930197					91.4	0.156802		-2.4414e-06			91.4	0.00017822
															91.5	0.0930197					91.5	0.164269		-2.4414e-06			91.5	0.00017944
															91.6	0.102276					91.6	0.164269		-2.4414e-06			91.6	0.00017944
															91.7	0.111533					91.7	0.171735		-2.4414e-06			91.7	0.00017944
															91.8	0.111533					91.8	0.164269		-2.4414e-06
															91.9	0.0930197					91.9	0.164269		-2.4414e-06
															92	0.0930197					92	0.164269		-1.2207e-06
															92.1	0.102276					92.1	0.171735		-1.2207e-06
															92.2	0.102276					92.2	0.164269		-2.4414e-06
															92.3	0.0930197					92.3	0.164269		-2.4414e-06
															92.4	0.102276					92.4	0.171735		-2.4414e-06
															92.5	0.102276					92.5	0.179201		-1.2207e-06
															92.6	0.111533					92.6	0.171735		-2.4414e-06
															92.7	0.102276					92.7	0.171735		-2.4414e-06
															92.8	0.0930197					92.8	0.171735		-2.4414e-06
															92.9	0.102276					92.9	0.179201		-2.4414e-06
															93	0.102276					93	0.179201		-1.2207e-06
															93.1	0.111533					93.1	0.171735		-2.4414e-06
															93.2	0.102276					93.2	0.164269		-1.2207e-06
															93.3	0.102276					93.3	0.171735		-2.4414e-06
															93.4	0.102276					93.4	0.164269		-2.4414e-06
															93.5	0.102276					93.5	0.164269		-3.6621e-06
															93.6	0.102276					93.6	0.171735		-2.4414e-06
															93.7	0.102276					93.7	0.164269		-2.4414e-06
															93.8	0.102276					93.8	0.171735		-2.4414e-06
															93.9	0.111533					93.9	0.171735		-2.4414e-06
															94	0.111533					94	0.164269		-2.4414e-06
															94.1	0.102276					94.1	0.164269		-1.2207e-06
															94.2	0.111533					94.2	0.171735		-2.4414e-06
															94.3	0.111533					94.3	0.164269		-2.4414e-06
															94.4	0.111533					94.4	0.171735		-1.2207e-06
															94.5	0.102276					94.5	0.171735		-1.2207e-06
															94.6	0.102276					94.6	0.171735		-2.4414e-06
															94.7	0.102276					94.7	0.171735		-2.4414e-06
															94.8	0.111533					94.8	0.171735		-1.2207e-06
															94.9	0.102276					94.9	0.171735		-2.4414e-06
															95	0.102276					95	0.179201		-2.4414e-06
															95.1	0.111533					95.1	0.179201		-1.2207e-06
															95.2	0.0930197					95.2	0.171735		-1.2207e-06
															95.3	0.111533					95.3	0.171735		-1.2207e-06
															95.4	0.102276					95.4	0.171735		-1.2207e-06
															95.5	0.111533					95.5	0.179201		-1.2207e-06
															95.6	0.102276					95.6	0.171735		-1.2207e-06
															95.7	0.111533					95.7	0.171735		-2.4414e-06
															95.8	0.102276					95.8	0.171735		-2.4414e-06
															95.9	0.102276					95.9	0.171735		-2.4414e-06
															96	0.102276					96	0.179201		-1.2207e-06
															96.1	0.102276					96.1	0.171735		-1.2207e-06
															96.2	0.111533					96.2	0.179201		-2.4414e-06
															96.3	0.111533					96.3	0.171735		-1.2207e-06
															96.4	0.102276					96.4	0.171735		0
															96.5	0.111533					96.5	0.164269		-1.2207e-06
															96.6	0.111533					96.6	0.171735		-1.2207e-06
															96.7	0.102276					96.7	0.171735		-1.2207e-06
															96.8	0.111533					96.8	0.171735		-1.2207e-06
															96.9	0.111533					96.9	0.171735		-1.2207e-06
															97	0.102276					97	0.171735		-1.2207e-06
															97.1	0.102276					97.1	0.179201		-2.4414e-06
															97.2	0.102276					97.2	0.171735		-1.2207e-06
															97.3	0.0930197					97.3	0.171735		-1.2207e-06
															97.4	0.102276					97.4	0.179201		-1.2207e-06
															97.5	0.102276					97.5	0.179201		-1.2207e-06
															97.6	0.102276					97.6	0.171735		-2.4414e-06
															97.7	0.102276					97.7	0.171735		-1.2207e-06
															97.8	0.111533					97.8	0.179201		-1.2207e-06
															97.9	0.102276					97.9	0.171735		-1.2207e-06
															98	0.102276					98	0.171735		-1.2207e-06
															98.1	0.102276					98.1	0.179201		-2.4414e-06
															98.2	0.111533					98.2	0.179201		-1.2207e-06
															98.3	0.111533					98.3	0.179201		-1.2207e-06
															98.4	0.111533					98.4	0.179201		-1.2207e-06
															98.5	0.111533					98.5	0.179201		-1.2207e-06
															98.6	0.111533					98.6	0.179201		-1.2207e-06
															98.7	0.120789					98.7	0.171735		-1.2207e-06
															98.8	0.111533					98.8	0.171735		-1.2207e-06
															98.9	0.111533					98.9	0.171735		-1.2207e-06
															99	0.102276					99	0.179201		-1.2207e-06
															99.1	0.111533					99.1	0.179201		-1.2207e-06
															99.2	0.111533					99.2	0.171735		-1.2207e-06
															99.3	0.111533					99.3	0.179201		0
															99.4	0.111533					99.4	0.186667		0
															99.5	0.111533					99.5	0.179201		-1.2207e-06
															99.6	0.111533					99.6	0.179201		-1.2207e-06
															99.7	0.111533					99.7	0.179201		-1.2207e-06
															99.8	0.111533					99.8	0.179201		-1.2207e-06
															99.9	0.111533					99.9	0.179201		-1.2207e-06
															100	0.120789					100	0.179201		0
															100.1	0.120789					100.1	0.171735		0
															100.2	0.120789					100.2	0.179201		-1.2207e-06
															100.3	0.111533					100.3	0.179201		-1.2207e-06
															100.4	0.120789					100.4	0.179201		0
															100.5	0.120789					100.5	0.179201		-1.2207e-06
															100.6	0.120789					100.6	0.171735		-1.2207e-06
															100.7	0.120789					100.7	0.179201		-2.4414e-06
															100.8	0.120789					100.8	0.179201		-1.2207e-06
															100.9	0.111533					100.9	0.179201		-1.2207e-06
															101	0.120789					101	0.179201		-1.2207e-06
															101.1	0.111533					101.1	0.171735		-1.2207e-06
															101.2	0.102276					101.2	0.179201		-1.2207e-06
															101.3	0.102276					101.3	0.179201		-1.2207e-06
															101.4	0.111533					101.4	0.179201		0
															101.5	0.102276					101.5	0.179201		0
															101.6	0.102276					101.6	0.179201		0
															101.7	0.111533					101.7	0.179201		-1.2207e-06
															101.8	0.102276					101.8	0.179201		-1.2207e-06
															101.9	0.111533					101.9	0.179201		-1.2207e-06
															102	0.102276					102	0.179201		0
															102.1	0.111533					102.1	0.179201		-1.2207e-06
															102.2	0.111533					102.2	0.179201		-1.2207e-06
															102.3	0.102276					102.3	0.186667		-1.2207e-06
															102.4	0.111533					102.4	0.186667		-1.2207e-06
															102.5	0.111533					102.5	0.179201		-1.2207e-06
															102.6	0.111533					102.6	0.179201		-1.2207e-06
															102.7	0.111533					102.7	0.179201		0
															102.8	0.111533					102.8	0.179201		-1.2207e-06
															102.9	0.120789					102.9	0.179201		-1.2207e-06
															103	0.111533					103	0.186667		-1.2207e-06
															103.1	0.120789					103.1	0.186667		0
															103.2	0.120789					103.2	0.179201		-1.2207e-06
															103.3	0.111533					103.3	0.179201		-1.2207e-06
															103.4	0.111533					103.4	0.186667		-1.2207e-06
															103.5	0.120789					103.5	0.179201		-1.2207e-06
															103.6	0.120789					103.6	0.179201		-1.2207e-06
															103.7	0.120789					103.7	0.171735		-2.4414e-06
															103.8	0.111533					103.8	0.179201		-2.4414e-06
															103.9	0.111533					103.9	0.179201		-1.2207e-06
															104	0.111533					104	0.179201		-1.2207e-06
															104.1	0.111533					104.1	0.179201		-1.2207e-06
															104.2	0.111533					104.2	0.179201		-2.4414e-06
															104.3	0.102276					104.3	0.179201		-1.2207e-06
															104.4	0.111533					104.4	0.186667		0
															104.5	0.111533					104.5	0.186667		-1.2207e-06
															104.6	0.111533					104.6	0.186667		0
															104.7	0.102276					104.7	0.179201		0
															104.8	0.102276					104.8	0.179201		-1.2207e-06
															104.9	0.111533					104.9	0.179201		0
															105	0.111533					105	0.186667		0
															105.1	0.102276					105.1	0.179201		-1.2207e-06
															105.2	0.102276					105.2	0.179201		-1.2207e-06
															105.3	0.111533					105.3	0.179201		0
															105.4	0.102276					105.4	0.179201		-1.2207e-06
															105.5	0.111533					105.5	0.179201		-2.4414e-06
															105.6	0.111533					105.6	0.179201		-1.2207e-06
															105.7	0.120789					105.7	0.186667		-1.2207e-06
															105.8	0.120789					105.8	0.179201		-2.4414e-06
															105.9	0.111533					105.9	0.179201		-1.2207e-06
															106	0.111533					106	0.179201		0
															106.1	0.111533					106.1	0.186667		-1.2207e-06
															106.2	0.120789					106.2	0.179201		-1.2207e-06
															106.3	0.120789					106.3	0.179201		-1.2207e-06
															106.4	0.111533					106.4	0.179201		-1.2207e-06
															106.5	0.111533					106.5	0.179201		-1.2207e-06
															106.6	0.102276					106.6	0.179201		0
															106.7	0.111533					106.7	0.171735		0
															106.8	0.111533					106.8	0.171735		0
															106.9	0.120789					106.9	0.179201		-1.2207e-06
															107	0.120789					107	0.179201		-1.2207e-06
															107.1	0.120789					107.1	0.179201		0
															107.2	0.111533					107.2	0.171735		-1.2207e-06
															107.3	0.102276					107.3	0.179201		0
															107.4	0.102276					107.4	0.186667		0
															107.5	0.111533					107.5	0.179201		-1.2207e-06
															107.6	0.111533					107.6	0.186667		0
															107.7	0.120789					107.7	0.186667		-1.2207e-06
															107.8	0.111533					107.8	0.179201		0
															107.9	0.111533					107.9	0.186667		0
															108	0.111533					108	0.186667		1.2207e-06
															108.1	0.120789					108.1	0.179201		0
															108.2	0.130046					108.2	0.179201		-1.2207e-06
															108.3	0.167147					108.3	0.186667		-1.2207e-06
															108.4	0.194917					108.4	0.179201		0
															108.5	0.222686					108.5	0.171735		0
															108.6	0.222686					108.6	0.179201		0
															108.7	0.241199					108.7	0.179201		0
															108.8	0.259712					108.8	0.171735		-1.2207e-06
															108.9	0.287481					108.9	0.179201		0
															109	0.296813					109	0.186667		-1.2207e-06
															109.1	0.315326					109.1	0.179201		0
															109.2	0.333839					109.2	0.179201		0
															109.3	0.352352					109.3	0.179201		0
															109.4	0.380121					109.4	0.179201		-1.2207e-06
															109.5	0.380121					109.5	0.179201		-2.4414e-06
															109.6	0.398634					109.6	0.186667		-1.2207e-06
															109.7	0.417147					109.7	0.186667		0
															109.8	0.435736					109.8	0.186667		-1.2207e-06
															109.9	0.463505					109.9	0.179201		-1.2207e-06
															110	0.482018					110	0.179201		-1.2207e-06
															110.1	0.519044					110.1	0.186667		0
															110.2	0.537557					110.2	0.179201		-1.2207e-06
															110.3	0.574659					110.3	0.186667		0
															110.4	0.611684					110.4	0.186667		1.2207e-06
															110.5	0.630197					110.5	0.179201		-1.2207e-06
															110.6	0.64871					110.6	0.186667		0
															110.7	0.667223					110.7	0.179201		0
															110.8	0.704325					110.8	0.186667		0
															110.9	0.750607					110.9	0.186667		1.2207e-06
															111	0.76912					111	0.194133		0
															111.1	0.806146					111.1	0.186667		0
															111.2	0.843247					111.2	0.179201		-1.2207e-06
															111.3	0.871017					111.3	0.179201		0
															111.4	0.898786					111.4	0.186667		0
															111.5	0.926555					111.5	0.186667		0
															111.6	0.935812					111.6	0.186667		0
															111.7	0.926555					111.7	0.186667		-1.2207e-06
															111.8	0.945068					111.8	0.179201		0
															111.9	0.954401					111.9	0.186667		0
															112	0.963657					112	0.179201		-1.2207e-06
															112.1	0.963657					112.1	0.186667		0
															112.2	0.98217					112.2	0.186667		0
															112.3	1.00068					112.3	0.186667		0
															112.4	1.00994					112.4	0.179201		0
															112.5	1.00994					112.5	0.171735		1.2207e-06
															112.6	1.00994					112.6	0.179201		1.2207e-06
															112.7	1.00068					112.7	0.186667		0
															112.8	1.0192					112.8	0.179201		0
															112.9	1.02845					112.9	0.179201		0
															113	1.0192					113	0.179201		0
															113.1	1.02845					113.1	0.186667		1.2207e-06
															113.2	1.0192					113.2	0.179201		1.2207e-06
															113.3	1.0192					113.3	0.186667		0
															113.4	1.02845					113.4	0.194133		1.2207e-06
															113.5	1.02845					113.5	0.179201		-1.2207e-06
															113.6	1.02845					113.6	0.186667		0
															113.7	1.03771					113.7	0.186667		0
															113.8	1.03771					113.8	0.186667		0
															113.9	1.02845					113.9	0.194133		0
															114	1.02845					114	0.186667		0
															114.1	1.02845					114.1	0.186667		1.2207e-06
															114.2	1.02845					114.2	0.179201		-1.2207e-06
															114.3	1.02845					114.3	0.186667		-1.2207e-06
															114.4	1.0192					114.4	0.186667		0
															114.5	1.00994					114.5	0.186667		1.2207e-06
															114.6	1.02845					114.6	0.186667		0
															114.7	1.0192					114.7	0.179201		0
															114.8	1.0192					114.8	0.186667		0
															114.9	1.00068					114.9	0.186667		0
															115	1.00994					115	0.179201		1.2207e-06
															115.1	1.00068					115.1	0.186667		0
															115.2	1.00068					115.2	0.186667		0
															115.3	0.991426					115.3	0.186667		0
															115.4	0.991426					115.4	0.186667		0
															115.5	0.991426					115.5	0.194133		0
															115.6	0.991426					115.6	0.194133		0
															115.7	0.98217					115.7	0.186667		0
															115.8	0.98217					115.8	0.186667		0
															115.9	0.991426					115.9	0.186667		1.2207e-06
															116	0.991426					116	0.186667		-1.2207e-06
															116.1	0.991426					116.1	0.194133		0
															116.2	0.991426					116.2	0.194133		0
															116.3	0.991426					116.3	0.186667		1.2207e-06
															116.4	0.991426					116.4	0.194133		1.2207e-06
															116.5	1.00068					116.5	0.179201		0
															116.6	0.991426					116.6	0.186667		1.2207e-06
															116.7	1.00068					116.7	0.186667		1.2207e-06
															116.8	1.00068					116.8	0.186667		1.2207e-06
															116.9	1.00068					116.9	0.186667		1.2207e-06
															117	0.991426					117	0.186667		1.2207e-06
															117.1	0.991426					117.1	0.194133		1.2207e-06
															117.2	0.98217					117.2	0.179201		0
															117.3	0.98217					117.3	0.179201		0
															117.4	0.98217					117.4	0.186667		1.2207e-06
															117.5	0.98217					117.5	0.194133		1.2207e-06
															117.6	0.991426					117.6	0.186667		1.2207e-06
															117.7	1.00068					117.7	0.186667		0
															117.8	0.991426					117.8	0.186667		1.2207e-06
															117.9	1.00068					117.9	0.186667		1.2207e-06
															118	0.991426					118	0.194133		2.4414e-06
															118.1	0.991426					118.1	0.186667		1.2207e-06
															118.2	0.991426					118.2	0.186667		1.2207e-06
															118.3	0.991426					118.3	0.186667		0
															118.4	1.00068					118.4	0.186667		0
															118.5	1.00068					118.5	0.186667		1.2207e-06
															118.6	1.00068					118.6	0.186667		0
															118.7	1.00068					118.7	0.186667		0
															118.8	1.00068					118.8	0.186667		2.4414e-06
															118.9	1.00068					118.9	0.194133		1.2207e-06
															119	1.00068					119	0.179201		1.2207e-06
															119.1	1.00068					119.1	0.186667		0
															119.2	0.991426					119.2	0.186667		0
															119.3	0.991426					119.3	0.194133		1.2207e-06
															119.4	1.00068					119.4	0.194133		0
															119.5	1.00068					119.5	0.186667		1.2207e-06
															119.6	1.00068					119.6	0.194133		1.2207e-06
															119.7	0.991426					119.7	0.194133		1.2207e-06
															119.8	1.00068					119.8	0.194133		1.2207e-06
															119.9	1.00068					119.9	0.194133		1.2207e-06
															120	1.00994					120	0.194133		1.2207e-06
															120.1	1.00068					120.1	0.194133		1.2207e-06
															120.2	1.00068					120.2	0.186667		1.2207e-06
															120.3	1.00068					120.3	0.186667		0
															120.4	1.00068					120.4	0.194133		1.2207e-06
															120.5	1.00068					120.5	0.194133		1.2207e-06
															120.6	0.98217					120.6	0.194133		1.2207e-06
															120.7	0.991426					120.7	0.186667		1.2207e-06
															120.8	1.00068					120.8	0.194133		1.2207e-06
															120.9	1.00068					120.9	0.194133		1.2207e-06
															121	0.991426					121	0.201599		1.2207e-06
															121.1	1.00068					121.1	0.194133		1.2207e-06
															121.2	1.00068					121.2	0.194133		1.2207e-06
															121.3	1.00068					121.3	0.186667		0
															121.4	1.00068					121.4	0.186667		1.2207e-06
															121.5	1.00068					121.5	0.194133		2.4414e-06
															121.6	1.00994					121.6	0.186667		1.2207e-06
															121.7	1.00068					121.7	0.186667		1.2207e-06
															121.8	1.00068					121.8	0.201599		1.2207e-06
															121.9	1.00068					121.9	0.194133		1.2207e-06
															122	1.00068					122	0.194133		1.2207e-06
															122.1	1.00068					122.1	0.186667		1.2207e-06
															122.2	1.00994					122.2	0.186667		0
															122.3	1.00068					122.3	0.194133		1.2207e-06
															122.4	1.00068					122.4	0.186667		1.2207e-06
															122.5	1.00068					122.5	0.194133		1.2207e-06
															122.6	1.00068					122.6	0.194133		1.2207e-06
															122.7	1.00068					122.7	0.194133		0
															122.8	0.991426					122.8	0.194133		2.4414e-06
															122.9	0.991426					122.9	0.194133		1.2207e-06
															123	1.00068					123	0.194133		1.2207e-06
															123.1	1.00068					123.1	0.194133		1.2207e-06
															123.2	1.00068					123.2	0.194133		2.4414e-06
															123.3	0.991426					123.3	0.186667		3.6621e-06
															123.4	1.00068					123.4	0.194133		2.4414e-06
															123.5	1.00068					123.5	0.194133		1.2207e-06
															123.6	1.00068					123.6	0.194133		1.2207e-06
															123.7	0.991426					123.7	0.194133		1.2207e-06
															123.8	1.00068					123.8	0.194133		2.4414e-06
															123.9	1.00994					123.9	0.194133		2.4414e-06
															124	1.00068					124	0.194133		1.2207e-06
															124.1	1.00068					124.1	0.194133		1.2207e-06
															124.2	1.00068					124.2	0.194133		1.2207e-06
															124.3	1.00994					124.3	0.186667		1.2207e-06
															124.4	1.00068					124.4	0.194133		2.4414e-06
															124.5	1.00068					124.5	0.201599		1.2207e-06
															124.6	1.00068					124.6	0.194133		1.2207e-06
															124.7	1.00068					124.7	0.194133		2.4414e-06
															124.8	1.00068					124.8	0.194133		1.2207e-06
															124.9	1.00994					124.9	0.194133		1.2207e-06
															125	1.00068					125	0.194133		2.4414e-06
															125.1	0.991426					125.1	0.194133		2.4414e-06
															125.2	1.00068					125.2	0.186667		1.2207e-06
															125.3	1.00068					125.3	0.194133		2.4414e-06
															125.4	1.00068					125.4	0.194133		2.4414e-06
															125.5	0.991426					125.5	0.194133		1.2207e-06
															125.6	1.00068					125.6	0.194133		1.2207e-06
															125.7	0.991426					125.7	0.186667		1.2207e-06
															125.8	1.00068					125.8	0.201599		2.4414e-06
															125.9	1.00068					125.9	0.194133		2.4414e-06
															126	1.00068					126	0.194133		2.4414e-06
															126.1	1.00068					126.1	0.194133		2.4414e-06
															126.2	1.00068					126.2	0.201599		1.2207e-06
															126.3	1.00068					126.3	0.209065		2.4414e-06
															126.4	1.00068					126.4	0.201599		2.4414e-06
															126.5	1.00068					126.5	0.194133		1.2207e-06
															126.6	1.00068					126.6	0.194133		1.2207e-06
															126.7	1.00068					126.7	0.194133		2.4414e-06
															126.8	1.00068					126.8	0.201599		2.4414e-06
															126.9	1.00068					126.9	0.201599		1.2207e-06
															127	1.00068					127	0.194133		2.4414e-06
															127.1	1.00068					127.1	0.194133		2.4414e-06
															127.2	1.00068					127.2	0.194133		2.4414e-06
															127.3	1.00068					127.3	0.194133		3.6621e-06
															127.4	1.00994					127.4	0.201599		1.2207e-06
															127.5	1.00994					127.5	0.194133		1.2207e-06
															127.6	1.00068					127.6	0.194133		2.4414e-06
																					127.7	0.201599		2.4414e-06
																					127.8	0.194133		2.4414e-06
																					127.9	0.194133		2.4414e-06
																					128	0.201599		2.4414e-06
																					128.1	0.201599		3.6621e-06
																					128.2	0.194133		3.6621e-06
																					128.3	0.201599		2.4414e-06
																					128.4	0.201599		2.4414e-06
																					128.5	0.194133		2.4414e-06
																					128.6	0.194133		2.4414e-06
																					128.7	0.194133		2.4414e-06
																					128.8	0.201599		1.2207e-06
																					128.9	0.201599		2.4414e-06
																					129	0.201599		2.4414e-06
																					129.1	0.201599		2.4414e-06
																					129.2	0.194133		2.4414e-06
																					129.3	0.201599		3.6621e-06
																					129.4	0.201599		2.4414e-06
																					129.5	0.194133		2.4414e-06
																					129.6	0.194133		2.4414e-06
																					129.7	0.201599		3.6621e-06
																					129.8	0.201599		2.4414e-06
																					129.9	0.194133		3.6621e-06
																					130	0.201599		3.6621e-06
																					130.1	0.201599		2.4414e-06
																					130.2	0.201599		2.4414e-06
																					130.3	0.209065		3.6621e-06
																					130.4	0.194133		3.6621e-06
																					130.5	0.194133		2.4414e-06
																					130.6	0.201599		2.4414e-06
																					130.7	0.201599		2.4414e-06
																					130.8	0.201599		3.6621e-06
																					130.9	0.201599		2.4414e-06
																					131	0.201599		2.4414e-06
																					131.1	0.209065		2.4414e-06
																					131.2	0.209065		2.4414e-06
																					131.3	0.201599		3.6621e-06
																					131.4	0.201599		2.4414e-06
																					131.5	0.201599		2.4414e-06
																					131.6	0.201599		3.6621e-06
																					131.7	0.201599		3.6621e-06
																					131.8	0.194133		3.6621e-06
																					131.9	0.201599		3.6621e-06
																					132	0.201599		2.4414e-06
																					132.1	0.201599		3.6621e-06
																					132.2	0.201599		2.4414e-06
																					132.3	0.209065		4.8828e-06
																					132.4	0.201599		3.6621e-06
																					132.5	0.201599		3.6621e-06
																					132.6	0.201599		3.6621e-06
																					132.7	0.209065		3.6621e-06
																					132.8	0.201599		2.4414e-06
																					132.9	0.209065		3.6621e-06
																					133	0.209065		3.6621e-06
																					133.1	0.201599		2.4414e-06
																					133.2	0.201599		4.8828e-06
																					133.3	0.209065		3.6621e-06
																					133.4	0.209065		3.6621e-06
																					133.5	0.201599		2.4414e-06
																					133.6	0.201599		2.4414e-06
																					133.7	0.201599		3.6621e-06
																					133.8	0.209065		3.6621e-06
																					133.9	0.201599		3.6621e-06
																					134	0.201599		3.6621e-06
																					134.1	0.201599		3.6621e-06
																					134.2	0.201599		3.6621e-06
																					134.3	0.209065		3.6621e-06
																					134.4	0.201599		3.6621e-06
																					134.5	0.201599		3.6621e-06
																					134.6	0.209065		2.4414e-06
																					134.7	0.209065		3.6621e-06
																					134.8	0.209065		3.6621e-06
																					134.9	0.209065		2.4414e-06
																					135	0.201599		3.6621e-06
																					135.1	0.209065		3.6621e-06
																					135.2	0.201599		3.6621e-06
																					135.3	0.216531		3.6621e-06
																					135.4	0.209065		2.4414e-06
																					135.5	0.209065		3.6621e-06
																					135.6	0.209065		3.6621e-06
																					135.7	0.209065		2.4414e-06
																					135.8	0.201599		3.6621e-06
																					135.9	0.209065		2.4414e-06
																					136	0.209065		3.6621e-06
																					136.1	0.201599		3.6621e-06
																					136.2	0.216531		4.8828e-06
																					136.3	0.209065		3.6621e-06
																					136.4	0.209065		3.6621e-06
																					136.5	0.201599		3.6621e-06
																					136.6	0.201599		3.6621e-06
																					136.7	0.209065		2.4414e-06
																					136.8	0.209065		3.6621e-06
																					136.9	0.209065		4.8828e-06
																					137	0.209065		3.6621e-06
																					137.1	0.209065		4.8828e-06
																					137.2	0.209065		3.6621e-06
																					137.3	0.209065		3.6621e-06
																					137.4	0.209065		4.8828e-06
																					137.5	0.209065		3.6621e-06
																					137.6	0.201599		4.8828e-06
																					137.7	0.209065		4.8828e-06
																					137.8	0.209065		4.8828e-06
																					137.9	0.201599		3.6621e-06
																					138	0.209065		3.6621e-06
																					138.1	0.209065		6.1035e-06
																					138.2	0.209065		6.1035e-06
																					138.3	0.209065		4.8828e-06
																					138.4	0.201599		6.1035e-06
																					138.5	0.209065		4.8828e-06
																					138.6	0.209065		3.6621e-06
																					138.7	0.201599		3.6621e-06
																					138.8	0.209065		3.6621e-06
																					138.9	0.201599		3.6621e-06
																					139	0.209065		3.6621e-06
																					139.1	0.209065		3.6621e-06
																					139.2	0.216531		4.8828e-06
																					139.3	0.209065		3.6621e-06
																					139.4	0.209065		4.8828e-06
																					139.5	0.209065		4.8828e-06
																					139.6	0.209065		4.8828e-06
																					139.7	0.201599		4.8828e-06
																					139.8	0.209065		3.6621e-06
																					139.9	0.216531		4.8828e-06
																					140	0.209065		4.8828e-06
																					140.1	0.216531		3.6621e-06
																					140.2	0.209065		3.6621e-06
																					140.3	0.209065		3.6621e-06
																					140.4	0.216531		4.8828e-06
																					140.5	0.209065		3.6621e-06
																					140.6	0.216531		4.8828e-06
																					140.7	0.216531		4.8828e-06
																					140.8	0.216531		4.8828e-06
																					140.9	0.209065		4.8828e-06
																					141	0.209065		4.8828e-06
																					141.1	0.223997		3.6621e-06
																					141.2	0.223997		4.8828e-06
																					141.3	0.216531		6.1035e-06
																					141.4	0.223997		4.8828e-06
																					141.5	0.216531		4.8828e-06
																					141.6	0.209065		4.8828e-06
																					141.7	0.209065		4.8828e-06
																					141.8	0.209065		4.8828e-06
																					141.9	0.209065		4.8828e-06
																					142	0.209065		4.8828e-06
																					142.1	0.209065		3.6621e-06
																					142.2	0.216531		4.8828e-06
																					142.3	0.209065		3.6621e-06
																					142.4	0.216531		4.8828e-06
																					142.5	0.216531		6.1035e-06
																					142.6	0.216531		4.8828e-06
																					142.7	0.216531		4.8828e-06
																					142.8	0.209065		4.8828e-06
																					142.9	0.216531		4.8828e-06
																					143	0.216531		3.6621e-06
																					143.1	0.209065		4.8828e-06
																					143.2	0.209065		4.8828e-06
																					143.3	0.209065		4.8828e-06
																					143.4	0.216531		6.1035e-06
																					143.5	0.209065		6.1035e-06
																					143.6	0.216531		4.8828e-06
																					143.7	0.216531		3.6621e-06
																					143.8	0.216531		4.8828e-06
																					143.9	0.216531		4.8828e-06
																					144	0.216531		4.8828e-06
																					144.1	0.209065		6.1035e-06
																					144.2	0.216531		6.1035e-06
																					144.3	0.223997		6.1035e-06
																					144.4	0.216531		7.3242e-06
																					144.5	0.216531		4.8828e-06
																					144.6	0.216531		4.8828e-06
																					144.7	0.216531		6.1035e-06
																					144.8	0.216531		6.1035e-06
																					144.9	0.216531		4.8828e-06
																					145	0.216531		6.1035e-06
																					145.1	0.209065		7.3242e-06
																					145.2	0.216531		7.3242e-06
																					145.3	0.209065		7.3242e-06
																					145.4	0.216531		7.3242e-06
																					145.5	0.223997		6.1035e-06
																					145.6	0.216531		7.3242e-06
																					145.7	0.216531		8.5449e-06
																					145.8	0.216531		7.3242e-06
																					145.9	0.216531		6.1035e-06
																					146	0.209065		7.3242e-06
																					146.1	0.216531		8.5449e-06
																					146.2	0.216531		7.3242e-06
																					146.3	0.216531		7.3242e-06
																					146.4	0.223997		7.3242e-06
																					146.5	0.223997		7.3242e-06
																					146.6	0.216531		8.5449e-06
																					146.7	0.209065		7.3242e-06
																					146.8	0.216531		6.1035e-06
																					146.9	0.216531		7.3242e-06
																					147	0.216531		6.1035e-06
																					147.1	0.223997		6.1035e-06
																					147.2	0.223997		4.8828e-06
																					147.3	0.223997		6.1035e-06
																					147.4	0.231463		7.3242e-06
																					147.5	0.216531		7.3242e-06
																					147.6	0.216531		7.3242e-06
																					147.7	0.223997		7.3242e-06
																					147.8	0.223997		6.1035e-06
																					147.9	0.216531		6.1035e-06
																					148	0.223997		6.1035e-06
																					148.1	0.231463		6.1035e-06
																					148.2	0.231463		6.1035e-06
																					148.3	0.231463		7.3242e-06
																					148.4	0.231463		7.3242e-06
																					148.5	0.223997		7.3242e-06
																					148.6	0.231463		6.1035e-06
																					148.7	0.238929		6.1035e-06
																					148.8	0.231463		7.3242e-06
																					148.9	0.223997		7.3242e-06
																					149	0.231463		7.3242e-06
																					149.1	0.238929		7.3242e-06
																					149.2	0.231463		7.3242e-06
																					149.3	0.231463		7.3242e-06
																					149.4	0.231463		6.1035e-06
																					149.5	0.231463		6.1035e-06
																					149.6	0.238929		8.5449e-06
																					149.7	0.231463		8.5449e-06
																					149.8	0.223997		7.3242e-06
																					149.9	0.231463		7.3242e-06
																					150	0.223997		7.3242e-06
																					150.1	0.223997		7.3242e-06
																					150.2	0.216531		7.3242e-06
																					150.3	0.223997		6.1035e-06
																					150.4	0.231463		7.3242e-06
																					150.5	0.231463		7.3242e-06
																					150.6	0.231463		7.3242e-06
																					150.7	0.231463		6.1035e-06
																					150.8	0.223997		7.3242e-06
																					150.9	0.223997		7.3242e-06
																					151	0.223997		8.5449e-06
																					151.1	0.223997		7.3242e-06
																					151.2	0.223997		7.3242e-06
																					151.3	0.231463		7.3242e-06
																					151.4	0.231463		8.5449e-06
																					151.5	0.231463		8.5449e-06
																					151.6	0.223997		7.3242e-06
																					151.7	0.223997		7.3242e-06
																					151.8	0.231463		7.3242e-06
																					151.9	0.231463		7.3242e-06
																					152	0.231463		7.3242e-06
																					152.1	0.231463		8.5449e-06
																					152.2	0.231463		8.5449e-06
																					152.3	0.231463		8.5449e-06
																					152.4	0.223997		7.3242e-06
																					152.5	0.223997		7.3242e-06
																					152.6	0.238929		7.3242e-06
																					152.7	0.238929		8.5449e-06
																					152.8	0.231463		8.5449e-06
																					152.9	0.231463		7.3242e-06
																					153	0.231463		7.3242e-06
																					153.1	0.231463		7.3242e-06
																					153.2	0.231463		7.3242e-06
																					153.3	0.223997		7.3242e-06
																					153.4	0.231463		6.1035e-06
																					153.5	0.231463		7.3242e-06
																					153.6	0.231463		7.3242e-06
																					153.7	0.223997		7.3242e-06
																					153.8	0.231463		7.3242e-06
																					153.9	0.231463		7.3242e-06
																					154	0.238929		9.7656e-06
																					154.1	0.231463		8.5449e-06
																					154.2	0.231463		7.3242e-06
																					154.3	0.231463		8.5449e-06
																					154.4	0.238929		8.5449e-06
																					154.5	0.238929		8.5449e-06
																					154.6	0.231463		8.5449e-06
																					154.7	0.231463		7.3242e-06
																					154.8	0.231463		7.3242e-06
																					154.9	0.231463		8.5449e-06
																					155	0.231463		7.3242e-06
																					155.1	0.238929		8.5449e-06
																					155.2	0.238929		7.3242e-06
																					155.3	0.238929		8.5449e-06
																					155.4	0.231463		8.5449e-06
																					155.5	0.231463		7.3242e-06
																					155.6	0.231463		7.3242e-06
																					155.7	0.238929		8.5449e-06
																					155.8	0.238929		9.7656e-06
																					155.9	0.231463		8.5449e-06
																					156	0.231463		7.3242e-06
																					156.1	0.231463		7.3242e-06
																					156.2	0.231463		8.5449e-06
																					156.3	0.231463		8.5449e-06
																					156.4	0.223997		8.5449e-06
																					156.5	0.231463		8.5449e-06
																					156.6	0.231463		8.5449e-06
																					156.7	0.231463		8.5449e-06
																					156.8	0.231463		7.3242e-06
																					156.9	0.231463		7.3242e-06
																					157	0.246395		8.5449e-06
																					157.1	0.238929		8.5449e-06
																					157.2	0.231463		9.7656e-06
																					157.3	0.238929		8.5449e-06
																					157.4	0.238929		8.5449e-06
																					157.5	0.238929		8.5449e-06
																					157.6	0.238929		8.5449e-06
																					157.7	0.231463		8.5449e-06
																					157.8	0.231463		8.5449e-06
																					157.9	0.238929		8.5449e-06
																					158	0.231463		8.5449e-06
																					158.1	0.238929		7.3242e-06
																					158.2	0.231463		8.5449e-06
																					158.3	0.238929		7.3242e-06
																					158.4	0.238929		8.5449e-06
																					158.5	0.231463		7.3242e-06
																					158.6	0.231463		7.3242e-06
																					158.7	0.238929		8.5449e-06
																					158.8	0.246395		8.5449e-06
																					158.9	0.238929		8.5449e-06
																					159	0.231463		8.5449e-06
																					159.1	0.231463		8.5449e-06
																					159.2	0.238929		8.5449e-06
																					159.3	0.238929		9.7656e-06
																					159.4	0.238929		7.3242e-06
																					159.5	0.238929		8.5449e-06
																					159.6	0.238929		8.5449e-06
																					159.7	0.238929		8.5449e-06
																					159.8	0.231463		7.3242e-06
																					159.9	0.231463		7.3242e-06
																					160	0.238929		7.3242e-06
																					160.1	0.238929		7.3242e-06
																					160.2	0.246395		9.7656e-06
																					160.3	0.238929		9.7656e-06
																					160.4	0.238929		8.5449e-06
																					160.5	0.238929		8.5449e-06
																					160.6	0.238929		8.5449e-06
																					160.7	0.238929		9.7656e-06
																					160.8	0.238929		8.5449e-06
																					160.9	0.238929		8.5449e-06
																					161	0.238929		8.5449e-06
																					161.1	0.231463		8.5449e-06
																					161.2	0.238929		7.3242e-06
																					161.3	0.231463		7.3242e-06
																					161.4	0.238929		8.5449e-06
																					161.5	0.231463		9.7656e-06
																					161.6	0.231463		7.3242e-06
																					161.7	0.238929		8.5449e-06
																					161.8	0.238929		7.3242e-06
																					161.9	0.238929		8.5449e-06
																					162	0.238929		1.0986e-05
																					162.1	0.238929		1.709e-05
																					162.2	0.238929		1.8311e-05
																					162.3	0.246395		2.6855e-05
																					162.4	0.231463		3.7842e-05
																					162.5	0.238929		5.249e-05
																					162.6	0.238929		6.4697e-05
																					162.7	0.238929		7.5684e-05
																					162.8	0.231463		8.667e-05
																					162.9	0.231463		9.6436e-05
																					163	0.231463		0.0001062
																					163.1	0.231463		0.00011597
																					163.2	0.246395		0.00012329
																					163.3	0.246395		0.00012939
																					163.4	0.238929		0.00013428
																					163.5	0.238929		0.00013916
																					163.6	0.238929		0.00014404
																					163.7	0.246395		0.00014526
																					163.8	0.238929		0.00014526
																					163.9	0.238929		0.00014282
																					164	0.238929		0.0001355
																					164.1	0.238929		0.00012817
																					164.2	0.231463		0.00012085
																					164.3	0.231463		0.00012085
																					164.4	0.238929		0.00012573
																					164.5	0.246395		0.00012939
																					164.6	0.231463		0.00013062
																					164.7	0.238929		0.00013062
																					164.8	0.231463		0.00012939
																					164.9	0.238929		0.00013062
																					165	0.253859		0.00012939
																					165.1	0.291193		0.00012939
																					165.2	0.298661		0.00012695
																					165.3	0.350917		0.00012817
																					165.4	0.418116		0.00012939
																					165.5	0.507706		0.00013062
																					165.6	0.582367		0.00013062
																					165.7	0.649566		0.00013184
																					165.8	0.716758		0.00013184
																					165.9	0.776489		0.00013428
																					166	0.836208		0.00013672
																					166.1	0.895963		0.00013794
																					166.2	0.940734		0.00013672
																					166.3	0.978043		0.00013794
																					166.4	1.00795		0.00013794
																					166.5	1.0378		0.00013916
																					166.6	1.06765		0.00014038
																					166.7	1.07511		0.00014038
																					166.8	1.07511		0.00014038
																					166.9	1.06018		0.00014038
																					167	1.01541		0.00013916
																					167.1	0.970581		0.00013916
																					167.2	0.92581		0.00013916
																					167.3	0.92581		0.00013916
																					167.4	0.955657		0.00013794
																					167.5	0.978043		0.00013672
																					167.6	0.985566		0.0001355
																					167.7	0.985566		0.00013428
																					167.8	0.978043		0.00013306
																					167.9	0.985566		0.00013428
																					168	0.978043		0.00013428
																					168.1	0.978043		0.00013306
																					168.2	0.963119		0.00013306
																					168.3	0.970581		0.00013306
																					168.4	0.978043		0.00013428
																					168.5	0.985566		0.00013428
																					168.6	0.985566		0.00013306
																					168.7	0.993028		0.00013062
																					168.8	0.993028		0.00013062
																					168.9	1.00795		0.00013062
																					169	1.02287		0.00013062
																					169.1	1.03034		0.00013062
																					169.2	1.02287		0.00013062
																					169.3	1.03034		0.00013184
																					169.4	1.03034		0.00013184
																					169.5	1.0378		0.00013184
																					169.6	1.04526		0.00013184
																					169.7	1.04526		0.00013184
																					169.8	1.04526		0.00013306
																					169.9	1.04526		0.00013306
																					170	1.0378		0.00013306
																					170.1	1.0378		0.00013184
																					170.2	1.0378		0.00013306
																					170.3	1.0378		0.00013306
																					170.4	1.03034		0.00013306
																					170.5	1.02287		0.00013306
																					170.6	1.01541		0.00013306
																					170.7	1.00795		0.00013306
																					170.8	1.00049		0.00013184
																					170.9	1.00795		0.00013184
																					171	1.00795		0.00013306
																					171.1	1.00049		0.00013428
																					171.2	1.00049		0.00013306
																					171.3	1.00049		0.00013306
																					171.4	1.00795		0.00013306
																					171.5	1.00795		0.00013428
																					171.6	1.00049		0.00013428
																					171.7	0.985566		0.00013306
																					171.8	0.985566		0.00013306
																					171.9	0.985566		0.00013428
																					172	0.985566		0.00013428
																					172.1	0.985566		0.00013306
																					172.2	0.985566		0.00013306
																					172.3	0.993028		0.00013306
																					172.4	0.993028		0.00013306
																					172.5	0.993028		0.00013306
																					172.6	0.993028		0.00013306
																					172.7	0.993028		0.00013306
																					172.8	1.00049		0.00013306
																					172.9	1.00049		0.00013428
																					173	1.00049		0.00013306
																					173.1	0.993028		0.00013306
																					173.2	1.00049		0.00013306
																					173.3	1.00049		0.00013306
																					173.4	1.00049		0.00013306
																					173.5	1.00049		0.00013306
																					173.6	1.00049		0.00013184
																					173.7	1.00049		0.00013306
																					173.8	0.993028		0.00013306
																					173.9	0.993028		0.00013306
																					174	1.00049		0.00013428
																					174.1	1.00795		0.00013428
																					174.2	1.00049		0.00013428
																					174.3	1.00049		0.00013306
																					174.4	1.00049		0.00013306
																					174.5	1.00795		0.00013428
																					174.6	1.00795		0.00013306
																					174.7	1.00049		0.00013306
																					174.8	1.00049		0.00013306
																					174.9	1.00795		0.00013306
																					175	1.00795		0.00013306
																					175.1	1.00049		0.00013306
																					175.2	1.00049		0.00013184
																					175.3	1.00049		0.00013062
																					175.4	1.00049		0.00013184
																					175.5	1.00049		0.00013306
																					175.6	1.00049		0.00013428
																					175.7	1.00049		0.00013184
																					175.8	1.00049		0.00013306
																					175.9	1.00795		0.00013306
																					176	1.00049		0.00013306
																					176.1	1.00049		0.00013306
																					176.2	1.00049		0.00013306
																					176.3	1.00049		0.00013428
																					176.4	1.00049		0.00013428
																					176.5	1.00049		0.00013306
																					176.6	0.993028		0.00013306
																					176.7	1.00049		0.00013306
																					176.8	1.00049		0.00013306
																					176.9	1.00049		0.00013306
																					177	1.00795		0.00013306
																					177.1	1.00795		0.00013428
																					177.2	1.00795		0.00013428
																					177.3	1.00049		0.00013428
																					177.4	1.00049		0.00013306
																					177.5	1.00795		0.00013306
																					177.6	1.00049		0.00013428
																					177.7	1.00049		0.0001355
																					177.8	1.00049		0.00013428
																					177.9	1.00049		0.00013428
																					178	1.00049		0.00013306
																					178.1	1.00049		0.0001355
																					178.2	0.993028		0.00013428
																					178.3	0.985566		0.00013306
																					178.4	0.993028		0.00013428
																					178.5	1.00049		0.00013428
																					178.6	1.00795		0.00013306
																					178.7	0.993028		0.00013428
																					178.8	1.00049		0.00013184
																					178.9	1.00049		0.00013306
																					179	1.00049		0.00013306
																					179.1	1.00049		0.00013428
																					179.2	1.00049		0.00013184
																					179.3	1.00795		0.00013306
																					179.4	1.00795		0.00013306
																					179.5	1.00049		0.00013306
																					179.6	1.00049		0.00013306
																					179.7	1.00049		0.00013306
																					179.8	1.00049		0.00013306
																					179.9	1.00049		0.00013428
																					180	1.00049		0.0001355
																					180.1	1.00795		0.00013306
																					180.2	1.00795		0.00013428
																					180.3	1.00795		0.00013428
																					180.4	1.00049		0.00013306
																					180.5	1.00049		0.00013184
																					180.6	1.00795		0.00013306
																					180.7	1.01541		0.00013306
																					180.8	1.00795		0.00013428
																					180.9	1.00795		0.00013428
																					181	1.00049		0.00013428
																					181.1	1.01541		0.00013306
																					181.2	1.00795		0.00013306
																					181.3	1.00049		0.00013428
																					181.4	1.00795		0.00013306
																					181.5	1.00795		0.00013306
																					181.6	1.00049		0.00013306
																					181.7	1.00795		0.00013306
																					181.8	0.993028		0.00013184
																					181.9	1.00049		0.00013306
																					182	1.00049		0.00013306
																					182.1	1.00795		0.00013428
																					182.2	0.993028		0.00013184
																					182.3	1.00049		0.00013306
																					182.4	1.00049		0.00013306
																					182.5	1.00049		0.00013306
																					182.6	1.00049		0.00013306
																					182.7	1.00049		0.00013306
																					182.8	1.00049		0.00013184
																					182.9	1.00795		0.00013428
																					183	1.01541		0.00013306
																					183.1	1.00049		0.00013184
																					183.2	1.00795		0.00013306
																					183.3	1.00795		0.00013306
																					183.4	1.00049		0.00013428
																					183.5	0.993028		0.00013306
																					183.6	1.00049		0.00013306
																								0.00013306
																								0.00013306
																								0.00013306
																								0.00013428
																								0.00013184
																								0.00013306
																								0.00013306
																								0.00013428
																								0.00013306
																								0.00013306
																								0.00013428
																								0.00013428
																								0.00013184
																								0.00013306
																								0.00013184
																								0.00013428
																								0.00013306
																								0.00013306
																								0.00013428
																								0.00013428
																								0.00013428
																								0.00013306
																								0.00013306
																								0.00013306
																								0.00013428
																								0.00013306
																								0.00013428
																								0.00013306
																								0.00013428
																								0.00013306
																								0.00013306
																								0.00013306
																								0.00013306
																								0.00013184
																								0.00013184
																								0.00013306
																								0.00013306
																								0.00013428
																								0.00013184
																								0.00013428
																								0.00013184
																								0.00013428
																								0.00013306
																								0.00013306
																								0.00013306
																								0.00013428
																								0.00013428
																								0.00013428
																								0.00013306
																								0.00013428
																								0.00013428
																								0.00013428
																								0.00013428
																								0.00013306
																								0.0001355
																								0.00013428
																								0.00013306
																								0.00013184
																								0.00013306
																								0.00013428
																								0.00013428
																								0.00013428
																								0.00013428
																								0.00013428
																								0.00013306
																								0.00013428
																								0.00013428
																								0.00013428
																								0.0001355
																								0.00013306
																								0.00013428
																								0.00013306
																								0.00013428
																								0.00013306
																								0.00013428
																								0.00013428
																								0.00013428
																								0.00013428
																								0.00013428
																								0.00013428
																								0.0001355
																								0.00013428
																								0.00013306
																								0.00013428
																								0.00013428
																								0.00013428
																								0.00013428
																								0.00013306
																								0.00013306
																								0.00013428
																								0.00013428
																								0.00013428
																								0.00013306
																								0.00013428
																								0.00013428
																								0.00013306
																								0.00013184
																								0.00013306
																								0.00013306
																								0.00013428
																								0.00013306
																								0.00013306
																								0.00013306
																								0.00013306
																								0.00013428
																								0.00013428
																								0.00013428
																								0.00013428
																								0.00013428
																								0.00013794
																								0.00013672
																								0.00013916
																								0.00014282
																								0.00014282
																								0.00013916
																								0.00013794
																								0.00013184
																								0.00012451
																								0.00012207
																								0.00012695
																								0.00012939
																								0.00013306
																								0.00013184
																								0.00013428
																								0.00013428
																								0.00013428
																								0.00013428
																								0.00013428
																								0.00013428
																								0.00013428
																								0.00013428
																								0.00013428
																								0.00013428
																								0.00013428
																								0.0001355
																								0.00013428
																								0.00013428
																								0.0001355
																								0.0001355
																								0.00013428
																								0.00013306
																								0.00013306
																								0.00013428
																								0.0001355
