# Supplementary material for: The fluoride permeation pathway and anion recognition in Fluc family fluoride channels
Source: eLife. 2021 Jul 12;10:e69482. doi: 10.7554/eLife.69482 (PMC8315801; doi:10.7554/eLife.69482)
Supplement: Figure 3—source data 4. [file elife-69482-fig3-data4.xlsx]

## Sheet: Sheet1
			Time (s)	Trace #1 (pA)	S83C changing pH				Time (s)	Trace #1 (pA)	S83C/E88Q changing pH					E88Q		WT
	pH effect on WT E88Q		0	-333.809					0	-132.084					pH	I/Imax (mean)	SEM	I/Imax (mean)	SEM
			0.1	-331.748					0.1	-134.476					7	1		1
			0.2	-315.727					0.2	-135.115					7.2	0.825	0.015	0.685	0.033
			0.3	-331.601					0.3	-132.159					7.9	0.606	0.043	0.317	0.034
			0.4	-324.935					0.4	-133.496					8.7	0.275	0.057	0.087	0.013
			0.5	-333.351					0.5	-132.938
			0.6	-331.911					0.6	-133.445
			0.7	-327.155					0.7	-132.354
			0.8	-318.853					0.8	-134.992
			0.9	-323.293					0.9	-133.67
			1	-336.479					1	-137.471
			1.1	-325.178					1.1	-133.085
			1.2	-334.135					1.2	-134.103
			1.3	-328.487					1.3	-133.168
			1.4	-333.128					1.4	-136.317
			1.5	-337.291					1.5	-132.896
			1.6	-335.348					1.6	-132.484
			1.7	-332.595					1.7	-132.907
			1.8	-338.481					1.8	-132.436
			1.9	-333.379					1.9	-132.802
			2	-331.285					2	-133.338
			2.1	-334.396					2.1	-135.212
			2.2	-328.639					2.2	-130.673
			2.3	-326.683					2.3	-129.438
			2.4	-325.677					2.4	-133.865
			2.5	-327.824					2.5	-129.83
			2.6	-327.431					2.6	-133.533
			2.7	-329.596					2.7	-131.924
			2.8	-331.509					2.8	-132.507
			2.9	-329.899					2.9	-133.002
			3	-328.713					3	-134.991
			3.1	-329.56					3.1	-135.009
			3.2	-330.993					3.2	-134.828
			3.3	-323.268					3.3	-131.303
			3.4	-329.383					3.4	-133.659
			3.5	-334.091					3.5	-135.17
			3.6	-325.391					3.6	-132.824
			3.7	-327.792					3.7	-131.261
			3.8	-334.484					3.8	-134.151
			3.9	-325.766					3.9	-130.761
			4	-327.864					4	-136.325
			4.1	-328.141					4.1	-136.425
			4.2	-331.453					4.2	-135.932
			4.3	-319.538					4.3	-136.213
			4.4	-329.853					4.4	-136.045
			4.5	-326.877					4.5	-134.607
			4.6	-322.579					4.6	-133.954
			4.7	-330.776					4.7	-133.3
			4.8	-331.054					4.8	-133.371
			4.9	-331.02					4.9	-135.123
			5	-319.809					5	-135.431
			5.1	-329.057					5.1	-132.407
			5.2	-332.403					5.2	-131.85
			5.3	-328.798					5.3	-135.316
			5.4	-323.519					5.4	-135.803
			5.5	-319.823					5.5	-135.354
			5.6	-323.025					5.6	-105.307
			5.7	-326.067					5.7	-134.382
			5.8	-319.154					5.8	-135.309
			5.9	-301.661					5.9	-132.175
			6	-318.368					6	-132.036
			6.1	-302.958					6.1	-130.794
			6.2	-317.103					6.2	-127.436
			6.3	-305.561					6.3	-130.762
			6.4	-308.828					6.4	-130.259
			6.5	-311.857					6.5	-128.184
			6.6	-322.526					6.6	-130.986
			6.7	-325.917					6.7	-135.423
			6.8	-331.404					6.8	-134.973
			6.9	-318.479					6.9	-132.707
			7	-326.121					7	-135.953
			7.1	-317.734					7.1	-130.626
			7.2	-315.436					7.2	-135.161
			7.3	-319.841					7.3	-134.034
			7.4	-324.536					7.4	-72.5204
			7.5	-321.639					7.5	-127.536
			7.6	-323.253					7.6	-94.3901
			7.7	-327.799					7.7	-41.6246
			7.8	-62.9184					7.8	-53.8393
			7.9	-309.837					7.9	-32.1513
			8	-239.855					8	-59.0975
			8.1	-236.027					8.1	-64.696
			8.2	-242.014					8.2	-113.512
			8.3	-230.51					8.3	-124.275
			8.4	-264.655					8.4	-126.386
			8.5	-258.395					8.5	-127.595
			8.6	-261.028					8.6	-120.347
			8.7	-231.5					8.7	-126.562
			8.8	-320.137					8.8	-131.631
			8.9	-319.752					8.9	-131.765
			9	-316.881					9	-134.615
			9.1	-320.338					9.1	-132.743
			9.2	-320.226					9.2	-130.521
			9.3	-330.568					9.3	-131.815
			9.4	-325.515					9.4	-130.963
			9.5	-322.352					9.5	-135.09
			9.6	-321.769					9.6	-133.901
			9.7	-320.4					9.7	-134.093
			9.8	-324.394					9.8	-136.169
			9.9	-331.934					9.9	-132.759
			10	-322.569					10	-136.755
			10.1	-318.865					10.1	-132.904
			10.2	-328.601					10.2	-132.951
			10.3	-322.803					10.3	-134.559
			10.4	-324.651					10.4	-132.66
			10.5	-318.044					10.5	-136.331
			10.6	-320.059					10.6	-135.377
			10.7	-328.09					10.7	-133.709
			10.8	-321.009					10.8	-135.26
			10.9	-322.356					10.9	-132.708
			11	-323.186					11	-137.22
			11.1	-326.104					11.1	-135.403
			11.2	-332.423					11.2	-134.926
			11.3	-330.606					11.3	-135.421
			11.4	-315.865					11.4	-135.494
			11.5	-323.548					11.5	-133.513
			11.6	-327.293					11.6	-135.399
			11.7	-319.654					11.7	-133.594
			11.8	-324.253					11.8	-133.862
			11.9	-330.914					11.9	-134.774
			12	-330.182					12	-136.065
			12.1	-324.311					12.1	-137.786
			12.2	-323.909					12.2	-135.411
			12.3	-322.789					12.3	-135.664
			12.4	-328.917					12.4	-135.725
			12.5	-319.186					12.5	-134.622
			12.6	-327.94					12.6	-136.412
			12.7	-321.824					12.7	-133.421
			12.8	-316.777					12.8	-137.762
			12.9	-322.109					12.9	-136.435
			13	-321.498					13	-137.168
			13.1	-327.054					13.1	-136.757
			13.2	-325.735					13.2	-134.452
			13.3	-319.914					13.3	-135.42
			13.4	-324.422					13.4	-132.724
			13.5	-323.094					13.5	-130.894
			13.6	-318.226					13.6	-132.507
			13.7	-323.482					13.7	-136.273
			13.8	-329.492					13.8	-134.456
			13.9	-322.219					13.9	-132.292
			14	-326.796					14	-136.312
			14.1	-330.99					14.1	-134.698
			14.2	-327.229					14.2	-133.927
			14.3	-330.694					14.3	-135.504
			14.4	-315.07					14.4	-136.208
			14.5	-324.597					14.5	-133.326
			14.6	-331.692					14.6	-135.643
			14.7	-322.15					14.7	-138.128
			14.8	-323.583					14.8	-131.48
			14.9	-321.31					14.9	-134.334
			15	-337.015					15	-133.645
			15.1	-319.791					15.1	-131.654
			15.2	-304.591					15.2	-132.638
			15.3	-316.429					15.3	-129.92
			15.4	-319.971					15.4	-132.716
			15.5	-323.294					15.5	-136.383
			15.6	-319.258					15.6	-134.276
			15.7	-320.083					15.7	-132.646
			15.8	-325.071					15.8	-131.033
			15.9	-317.556					15.9	-136.622
			16	-330.162					16	-137.211
			16.1	-326.1					16.1	-133.845
			16.2	-313.443					16.2	-133.291
			16.3	-317.192					16.3	-133.175
			16.4	-326.061					16.4	-134.727
			16.5	-328.052					16.5	-122.454
			16.6	-472.955					16.6	-126.022
			16.7	-404.385					16.7	-115.134
			16.8	-447.114					16.8	-119.404
			16.9	-502.903					16.9	-130.283
			17	-608.361					17	-133.458
			17.1	-514.593					17.1	-131.521
			17.2	-350.506					17.2	-128.815
			17.3	-328.322					17.3	-133.924
			17.4	-365.352					17.4	-128.932
			17.5	-322.506					17.5	-131.246
			17.6	-324.632					17.6	-128.693
			17.7	-335.556					17.7	-221.086
			17.8	-345.523					17.8	-265.315
			17.9	-351.432					17.9	-275.679
			18	-330.171					18	-233.841
			18.1	-322.352					18.1	-265.176
			18.2	-315.587					18.2	-332.368
			18.3	-320.186					18.3	-354.691
			18.4	-316.287					18.4	-344.367
			18.5	-316.257					18.5	-128.931
			18.6	-321.228					18.6	-118.889
			18.7	-318.14					18.7	-97.9958
			18.8	-310.078					18.8	-92.4065
			18.9	-308.627					18.9	-89.5959
			19	-314.531					19	-92.3236
			19.1	-322.367					19.1	-97.1795
			19.2	-308.504					19.2	-104.169
			19.3	-319.499					19.3	-120.992
			19.4	-314.562					19.4	-149.452
			19.5	-314.669					19.5	-171.82
			19.6	-308.045					19.6	-121.647
			19.7	-310.958					19.7	-109.053
			19.8	-300.362					19.8	-115.639
			19.9	-302.711					19.9	-115.845
			20	-296.816					20	-120.608
			20.1	-297.305					20.1	-118.242
			20.2	-296.159					20.2	-120.48
			20.3	-297.273					20.3	-121.127
			20.4	-293.565					20.4	-118.994
			20.5	-291.144					20.5	-123.244
			20.6	-296.312					20.6	-126.565
			20.7	-300.688					20.7	-119.714
			20.8	-296.298					20.8	-124.192
			20.9	-299.572					20.9	-118.603
			21	-296.509					21	-124.347
			21.1	-288.009					21.1	-121.667
			21.2	-296.242					21.2	-123.961
			21.3	-298.327					21.3	-122.193
			21.4	-287.275					21.4	-125.74
			21.5	-289.299					21.5	-121.124
			21.6	-288.67					21.6	-121.731
			21.7	-286.846					21.7	-125.187
			21.8	-289.706					21.8	-121.647
			21.9	-285.525					21.9	-120.459
			22	-288.585					22	-118.884
			22.1	-289.672					22.1	-120.703
			22.2	-278.724					22.2	-121.081
			22.3	-283.084					22.3	-121.955
			22.4	-293.288					22.4	-120.864
			22.5	-285.782					22.5	-118.934
			22.6	-283.002					22.6	-121.758
			22.7	-289.433					22.7	-121.212
			22.8	-290.546					22.8	-123.585
			22.9	-288.731					22.9	-123.264
			23	-287.131					23	-122.795
			23.1	-291.512					23.1	-123.415
			23.2	-287.619					23.2	-125.493
			23.3	-285.476					23.3	-122.566
			23.4	-289.757					23.4	-125.564
			23.5	-286.838					23.5	-121.847
			23.6	-281.487					23.6	-125.458
			23.7	-288.315					23.7	-122.464
			23.8	-274.883					23.8	-122.832
			23.9	-282.577					23.9	-122.895
			24	-291.276					24	-122.645
			24.1	-279.216					24.1	-123.975
			24.2	-281.452					24.2	-120.83
			24.3	-284.571					24.3	-126.433
			24.4	-281.459					24.4	-119.707
			24.5	-282.552					24.5	-119.693
			24.6	-283.89					24.6	-122.68
			24.7	-276.773					24.7	-122.652
			24.8	-279.602					24.8	-120.222
			24.9	-286.598					24.9	-122.127
			25	-281.781					25	-123.517
			25.1	-275.823					25.1	-123.915
			25.2	-268.114					25.2	-117.935
			25.3	-275.481					25.3	-117.95
			25.4	-286.644					25.4	-118.814
			25.5	-271.576					25.5	-120.081
			25.6	-272.892					25.6	-121.212
			25.7	-272.242					25.7	-119.065
			25.8	-266.267					25.8	-120.927
			25.9	-264.964					25.9	-121.539
			26	-267.415					26	-121.114
			26.1	-271.288					26.1	-121.713
			26.2	-276.976					26.2	-121.318
			26.3	-276.389					26.3	-119.899
			26.4	-266.96					26.4	-117.031
			26.5	-265.254					26.5	-118.883
			26.6	-273.611					26.6	-118.124
			26.7	-270.845					26.7	-117.508
			26.8	-272.097					26.8	-114.914
			26.9	-265.637					26.9	-117.191
			27	-275.905					27	-116.176
			27.1	-267.568					27.1	-118.37
			27.2	-271.771					27.2	-118.066
			27.3	-268.339					27.3	-120.604
			27.4	-275.095					27.4	-116.826
			27.5	-262.781					27.5	-119.505
			27.6	-271.197					27.6	-116.199
			27.7	-270.101					27.7	-117.938
			27.8	-266.887					27.8	-113.109
			27.9	-262.303					27.9	-113.335
			28	-267.308					28	-115.799
			28.1	-256.57					28.1	-115.798
			28.2	-263.665					28.2	-116.217
			28.3	-263.778					28.3	-113.479
			28.4	-259.278					28.4	-114.143
			28.5	-264.347					28.5	-115.514
			28.6	-268.638					28.6	-117.252
			28.7	-262.651					28.7	-116.564
			28.8	-266.916					28.8	-114.093
			28.9	-275.722					28.9	-118.574
			29	-266.567					29	-115.719
			29.1	-259.881					29.1	-115.665
			29.2	-266.774					29.2	-117.119
			29.3	-272.503					29.3	-114.288
			29.4	-271.673					29.4	-115.288
			29.5	-266.533					29.5	-114.765
			29.6	-260.98					29.6	-114.606
			29.7	-266.152					29.7	-115.567
			29.8	-265.971					29.8	-115.147
			29.9	-260.877					29.9	-117.332
			30	-260.701					30	-116.9
			30.1	-269.837					30.1	-115.788
			30.2	-260.873					30.2	-116.517
			30.3	-259.06					30.3	-119.331
			30.4	-263.653					30.4	-113.905
			30.5	-262.107					30.5	-118.02
			30.6	-261.098					30.6	-115.386
			30.7	-263.467					30.7	-114.767
			30.8	-258.657					30.8	-114.634
			30.9	-255.394					30.9	-115.335
			31	-266.574					31	-117.548
			31.1	-255.962					31.1	-114.713
			31.2	-257.791					31.2	-115.912
			31.3	-253.988					31.3	-116.042
			31.4	-256.678					31.4	-115.032
			31.5	-257.866					31.5	-119.961
			31.6	-256.441					31.6	-113.217
			31.7	-257.542					31.7	-115.161
			31.8	-260.216					31.8	-116.656
			31.9	-259.605					31.9	-114.486
			32	-261.389					32	-111.705
			32.1	-263.749					32.1	-114.245
			32.2	-256.598					32.2	-114.359
			32.3	-252.9					32.3	-115.12
			32.4	-264.285					32.4	-113.324
			32.5	-258.276					32.5	-114.644
			32.6	-265.398					32.6	-114.199
			32.7	-255.936					32.7	-114.848
			32.8	-260.086					32.8	-115.175
			32.9	-259.418					32.9	-116.275
			33	-261.239					33	-110.648
			33.1	-253.083					33.1	-113.289
			33.2	-262.212					33.2	-111.864
			33.3	-250.898					33.3	-112.625
			33.4	-257.067					33.4	-113.624
			33.5	-247.906					33.5	-116.004
			33.6	-259.938					33.6	-112.552
			33.7	-250.176					33.7	-114.805
			33.8	-251.205					33.8	-113.733
			33.9	-251.338					33.9	-110.199
			34	-253.877					34	-111.555
			34.1	-256.351					34.1	-113.235
			34.2	-251.808					34.2	-113.587
			34.3	-259.409					34.3	-113.79
			34.4	-253.624					34.4	-114.99
			34.5	-260.48					34.5	-117.547
			34.6	-255.033					34.6	-115.086
			34.7	-256.576					34.7	-110.254
			34.8	-251.434					34.8	-112.857
			34.9	-253.435					34.9	-112.735
			35	-259.382					35	-112.966
			35.1	-247.255					35.1	-110.162
			35.2	-264.668					35.2	-114.288
			35.3	-251.451					35.3	-114.385
			35.4	-260.51					35.4	-114.183
			35.5	-253.124					35.5	-112.628
			35.6	-256.47					35.6	-115.808
			35.7	-253.004					35.7	-110.231
			35.8	-252.007					35.8	-115.271
			35.9	-244.227					35.9	-112.052
			36	-255.11					36	-110.966
			36.1	-245.498					36.1	-117.679
			36.2	-258.332					36.2	-115.83
			36.3	-255.262					36.3	-114.59
			36.4	-250.772					36.4	-115.698
			36.5	-251.688					36.5	-115.033
			36.6	-252.878					36.6	-113.949
			36.7	-250.126					36.7	-113.497
			36.8	-258.354					36.8	-115.392
			36.9	-253.585					36.9	-115.242
			37	-256.454					37	-110.828
			37.1	-256.867					37.1	-114.665
			37.2	-255.728					37.2	-114.361
			37.3	-252					37.3	-111.643
			37.4	-255.116					37.4	-112.182
			37.5	-255.701					37.5	-116.093
			37.6	-195.422					37.6	-114.582
			37.7	-173.085					37.7	-112.942
			37.8	-93.56					37.8	-113.39
			37.9	-159.912					37.9	-111.964
			38	-176.695					38	-113.749
			38.1	-194.851					38.1	-113.331
			38.2	-168.044					38.2	-112.761
			38.3	-225.586					38.3	-114.349
			38.4	-242.133					38.4	-116.355
			38.5	-248.759					38.5	-114.876
			38.6	-264.97					38.6	-113.359
			38.7	-248.482					38.7	-112.454
			38.8	-248.774					38.8	-113.529
			38.9	-260.791					38.9	-114.15
			39	-254.817					39	-114.303
			39.1	-255.941					39.1	-112.884
			39.2	-263.054					39.2	-110.661
			39.3	-250.552					39.3	-108.155
			39.4	-257.579					39.4	-104.368
			39.5	-262.836					39.5	-104.57
			39.6	-257.272					39.6	-112.27
			39.7	-253.981					39.7	-97.4346
			39.8	-259.695					39.8	-105.713
			39.9	-260.95					39.9	-107.623
			40	-259.464					40	-109.458
			40.1	-254.846					40.1	-104.223
			40.2	-260.995					40.2	-108.948
			40.3	-267.204					40.3	-110.205
			40.4	-266.679					40.4	-104.943
			40.5	-259.826					40.5	-105.271
			40.6	-259.007					40.6	-113.746
			40.7	-252.355					40.7	-15.2807
			40.8	-260.617					40.8	-20.2307
			40.9	-259.33					40.9	-8.51959
			41	-256.87					41	-96.2585
			41.1	-251.325					41.1	0.641472
			41.2	-249.219					41.2	1.64717
			41.3	-258.733					41.3	87.8882
			41.4	-251.101					41.4	-89.0916
			41.5	-253.741					41.5	-97.0012
			41.6	-249.014					41.6	-98.1328
			41.7	-249.916					41.7	-104.231
			41.8	-250.036					41.8	-101.222
			41.9	-261.075					41.9	-111.382
			42	-251.414					42	-90.8657
			42.1	-262.229					42.1	-98.255
			42.2	-259.473					42.2	-106.932
			42.3	-256.622					42.3	-107.448
			42.4	-251.928					42.4	-110.25
			42.5	-252.821					42.5	-107.641
			42.6	-255.571					42.6	-108.71
			42.7	-243.804					42.7	-110.673
			42.8	-257.047					42.8	-111.082
			42.9	-245.104					42.9	-110.517
			43	-255.288					43	-112.522
			43.1	-261.091					43.1	-112.825
			43.2	-248.199					43.2	-109.385
			43.3	-256.636					43.3	-106.67
			43.4	-250.394					43.4	-111.59
			43.5	-243.548					43.5	-110.107
			43.6	-256.872					43.6	-111.774
			43.7	-245.429					43.7	-112.427
			43.8	-250.926					43.8	-111.061
			43.9	-242.451					43.9	-110.111
			44	-249.754					44	-111.771
			44.1	-249.159					44.1	-115.286
			44.2	-246.133					44.2	-113.066
			44.3	-255.945					44.3	-112.184
			44.4	-254.024					44.4	-113.482
			44.5	-247.616					44.5	-113.434
			44.6	-241.13					44.6	-109.962
			44.7	-249.84					44.7	-112.491
			44.8	-249.766					44.8	-113.12
			44.9	-248.864					44.9	-113.861
			45	-247.837					45	-109.766
			45.1	-258.136					45.1	-110.695
			45.2	-243.628					45.2	-111.55
			45.3	-246.331					45.3	-109.578
			45.4	-240.512					45.4	-113.371
			45.5	-236.744					45.5	-113.433
			45.6	-239.647					45.6	-111.626
			45.7	-236.703					45.7	-114.252
			45.8	-233.262					45.8	-113.961
			45.9	-244.086					45.9	-111.053
			46	-244.27					46	-116.068
			46.1	-239.075					46.1	-110.784
			46.2	-245.562					46.2	-114.905
			46.3	-248.766					46.3	-113.118
			46.4	-249.076					46.4	-112.89
			46.5	-242.221					46.5	-111.97
			46.6	-237.462					46.6	-114.732
			46.7	-243.358					46.7	-113.995
			46.8	-243.56					46.8	-113.464
			46.9	-334.05					46.9	-113.376
			47	-289.167					47	-110.737
			47.1	-300.108					47.1	-113.475
			47.2	-311.473					47.2	-115.472
			47.3	-326.081					47.3	-110.887
			47.4	-383.913					47.4	-112.706
			47.5	-618.449					47.5	-114.008
			47.6	-238.588					47.6	-114.003
			47.7	-238.965					47.7	-117.006
			47.8	-242.599					47.8	-116.332
			47.9	-241.868					47.9	-111.987
			48	-255.942					48	-110.601
			48.1	-263.757					48.1	-112.644
			48.2	-268.899					48.2	-114.338
			48.3	-270.338					48.3	-115.622
			48.4	-264.799					48.4	-113.091
			48.5	-253.096					48.5	-116.899
			48.6	-256.594					48.6	-112.079
			48.7	-253.548					48.7	-108.533
			48.8	-260.701					48.8	-106.878
			48.9	-256.607					48.9	-105.31
			49	-253.107					49	-104.723
			49.1	-243.185					49.1	-108.59
			49.2	-255.312					49.2	-98.0281
			49.3	-250.819					49.3	-106.496
			49.4	-247.717					49.4	-108.691
			49.5	-234.888					49.5	-98.977
			49.6	-248.656					49.6	-109.248
			49.7	-242.583					49.7	-110.429
			49.8	-233.528					49.8	-110.761
			49.9	-230.588					49.9	-114.217
			50	-229.591					50	-94.1823
			50.1	-233.798					50.1	-213.876
			50.2	-229.797					50.2	-229.3
			50.3	-233.748					50.3	-255.52
			50.4	-226.053					50.4	-242.076
			50.5	-230.75					50.5	-198.898
			50.6	-223.917					50.6	-136.914
			50.7	-218.983					50.7	-121.95
			50.8	-220.785					50.8	-146.887
			50.9	-215.37					50.9	-114.398
			51	-222.692					51	-114.372
			51.1	-220.21					51.1	-111.046
			51.2	-218.509					51.2	-115.018
			51.3	-216.437					51.3	-109.211
			51.4	-210.642					51.4	-110.024
			51.5	-208.912					51.5	-110.948
			51.6	-209.486					51.6	-109.881
			51.7	-208.556					51.7	-114.811
			51.8	-209.249					51.8	-112.642
			51.9	-208.603					51.9	-110.065
			52	-209.43					52	-110.132
			52.1	-206.924					52.1	-108.701
			52.2	-212.458					52.2	-106.675
			52.3	-198.193					52.3	-108.393
			52.4	-200.334					52.4	-108.48
			52.5	-204.261					52.5	-104.495
			52.6	-197.447					52.6	-107.654
			52.7	-203.698					52.7	-104.896
			52.8	-191.643					52.8	-102.052
			52.9	-195.809					52.9	-104.23
			53	-192.254					53	-106.409
			53.1	-193					53.1	-103.628
			53.2	-194.662					53.2	-106.742
			53.3	-189.365					53.3	-103.624
			53.4	-189.672					53.4	-104.721
			53.5	-191.978					53.5	-100.349
			53.6	-192.788					53.6	-101.312
			53.7	-180.56					53.7	-102.521
			53.8	-186.926					53.8	-100.122
			53.9	-185.293					53.9	-102.217
			54	-187.471					54	-104.762
			54.1	-187.739					54.1	-101.341
			54.2	-182.894					54.2	-102.475
			54.3	-190.508					54.3	-102.118
			54.4	-184.668					54.4	-98.9309
			54.5	-177.559					54.5	-98.2027
			54.6	-187.561					54.6	-96.0027
			54.7	-174.844					54.7	-99.0606
			54.8	-179.719					54.8	-99.4129
			54.9	-175.991					54.9	-96.9722
			55	-181.093					55	-99.6004
			55.1	-177.559					55.1	-98.986
			55.2	-181.201					55.2	-99.0073
			55.3	-178.941					55.3	-98.2346
			55.4	-171.757					55.4	-99.9627
			55.5	-182.24					55.5	-102.394
			55.6	-176.333					55.6	-98.4377
			55.7	-176.595					55.7	-94.5136
			55.8	-176.463					55.8	-97.2194
			55.9	-169.923					55.9	-95.0984
			56	-177.164					56	-97.0609
			56.1	-171.605					56.1	-97.9358
			56.2	-176.417					56.2	-94.7334
			56.3	-163.215					56.3	-93.9587
			56.4	-171.901					56.4	-96.3123
			56.5	-169.414					56.5	-96.305
			56.6	-166.102					56.6	-91.5564
			56.7	-170.285					56.7	-90.6336
			56.8	-170.967					56.8	-94.8854
			56.9	-171.034					56.9	-96.1972
			57	-170.156					57	-95.1388
			57.1	-171.377					57.1	-93.8181
			57.2	-166.926					57.2	-94.8903
			57.3	-160.647					57.3	-96.591
			57.4	-166.052					57.4	-95.7891
			57.5	-165.362					57.5	-93.2409
			57.6	-163.759					57.6	-90.7478
			57.7	-165.323					57.7	-91.6164
			57.8	-158.389					57.8	-92.2457
			57.9	-155.82					57.9	-92.06
			58	-162.179					58	-92.8177
			58.1	-168.197					58.1	-91.1255
			58.2	-161.881					58.2	-91.6806
			58.3	-159.999					58.3	-89.6408
			58.4	-163.025					58.4	-92.5442
			58.5	-165.866					58.5	-92.8873
			58.6	-156.498					58.6	-88.6222
			58.7	-148.444					58.7	-90.0965
			58.8	-153.778					58.8	-92.0819
			58.9	-157.548					58.9	-88.7452
			59	-151.881					59	-90.7574
			59.1	-157.73					59.1	-89.1832
			59.2	-157.594					59.2	-89.8273
			59.3	-155.49					59.3	-90.2781
			59.4	-156.48					59.4	-89.83
			59.5	-158.466					59.5	-87.3122
			59.6	-153.905					59.6	-88.927
			59.7	-154.433					59.7	-86.0805
			59.8	-149.552					59.8	-88.1193
			59.9	-153.812					59.9	-88.8071
			60	-151.049					60	-87.903
			60.1	-160.531					60.1	-86.401
			60.2	-158.691					60.2	-88.1245
			60.3	-147.289					60.3	-88.5089
			60.4	-152.181					60.4	-86.4796
			60.5	-156.413					60.5	-88.0098
			60.6	-149.911					60.6	-89.4095
			60.7	-147.042					60.7	-87.6668
			60.8	-150.192					60.8	-90.2639
			60.9	-148.851					60.9	-87.252
			61	-156.771					61	-85.8253
			61.1	-149.486					61.1	-87.5781
			61.2	-147.464					61.2	-87.7875
			61.3	-152.092					61.3	-88.9616
			61.4	-147.848					61.4	-86.7831
			61.5	-143.382					61.5	-86.9125
			61.6	-152.539					61.6	-84.6826
			61.7	-153.74					61.7	-86.3548
			61.8	-145.565					61.8	-88.277
			61.9	-149.706					61.9	-85.5719
			62	-143.993					62	-84.3063
			62.1	-146.621					62.1	-86.6679
			62.2	-145.438					62.2	-84.7828
			62.3	-143.764					62.3	-84.8727
			62.4	-145.548					62.4	-82.8099
			62.5	-139.233					62.5	-83.5116
			62.6	-142.885					62.6	-84.3319
			62.7	-140.516					62.7	-84.6322
			62.8	-148.271					62.8	-82.5048
			62.9	-143.789					62.9	-84.3962
			63	-140.009					63	-81.2555
			63.1	-140.847					63.1	-84.7108
			63.2	-146.468					63.2	-83.6733
			63.3	-140.119					63.3	-85.5927
			63.4	-134.765					63.4	-82.656
			63.5	-137.936					63.5	-84.3837
			63.6	-138.624					63.6	-82.6906
			63.7	-138.763					63.7	-83.0962
			63.8	-141.705					63.8	-81.1515
			63.9	-138.765					63.9	-82.3584
			64	-142.398					64	-82.9114
			64.1	-134.888					64.1	-80.66
			64.2	-141.101					64.2	-81.4964
			64.3	-137.313					64.3	-82.7407
			64.4	-136.081					64.4	-83.1991
			64.5	-142.214					64.5	-83.0958
			64.6	-138.25					64.6	-78.7113
			64.7	-137.394					64.7	-81.5479
			64.8	-138.227					64.8	-80.7399
			64.9	-139.854					64.9	-82.0934
			65	-140.146					65	-81.5371
			65.1	-132.386					65.1	-82.0693
			65.2	-140.912					65.2	-81.5504
			65.3	-132.934					65.3	-82.0895
			65.4	-135.045					65.4	-80.6021
			65.5	-135.342					65.5	-80.6105
			65.6	-140.409					65.6	-83.3783
			65.7	-135.058					65.7	-82.0281
			65.8	-137.96					65.8	-81.4191
			65.9	-141.44					65.9	-79.6679
			66	-137.609					66	-81.0256
			66.1	-128.937					66.1	-79.0586
			66.2	-131.771					66.2	-83.2971
			66.3	-128.494					66.3	-79.5937
			66.4	-130.732					66.4	-80.9338
			66.5	-130.015					66.5	-81.4
			66.6	-134.498					66.6	-81.1432
			66.7	-132.913					66.7	-81.3807
			66.8	-140.534					66.8	-80.0401
			66.9	-128.894					66.9	-80.9595
			67	-127.832					67	-83.5216
			67.1	-133.383					67.1	-81.6651
			67.2	-126.829					67.2	-84.0971
			67.3	-127.486					67.3	-81.2735
			67.4	-130.774					67.4	-80.2607
			67.5	-130.541					67.5	-81.7216
			67.6	-132.14					67.6	-81.8442
			67.7	-130.101					67.7	-82.18
			67.8	-132.707					67.8	-78.8796
			67.9	-126.869					67.9	-82.1105
			68	-135.291					68	-81.0816
			68.1	-130.923					68.1	-81.2145
			68.2	-130.144					68.2	-81.3133
			68.3	-129.603					68.3	-80.298
			68.4	-132.087					68.4	-81.9894
			68.5	-131.635					68.5	-80.681
			68.6	-127.588					68.6	-80.0194
			68.7	-123.585					68.7	-79.734
			68.8	-124.075					68.8	-80.7608
			68.9	-130.671					68.9	-79.7371
			69	-124.152					69	-79.6474
			69.1	-131.203					69.1	-79.3533
			69.2	-126.247					69.2	-80.4075
			69.3	-127.757					69.3	-77.9158
			69.4	-125.939					69.4	-80.8509
			69.5	-130.807					69.5	-80.1118
			69.6	-125.679					69.6	-78.9603
			69.7	-125.236					69.7	-79.1079
			69.8	-128.549					69.8	-82.0494
			69.9	-124.446					69.9	-82.2106
			70	-128.996					70	-81.844
			70.1	-125.552					70.1	-80.4114
			70.2	-129.886					70.2	-80.3632
			70.3	-131.444					70.3	-82.7173
			70.4	-125.033					70.4	-81.1239
			70.5	-123.408					70.5	-81.0219
			70.6	-122.07					70.6	-82.2708
			70.7	-122.947					70.7	-80.4558
			70.8	-114.73					70.8	-79.7777
			70.9	-115.721					70.9	-83.4222
			71	-118.433					71	-79.7555
			71.1	-119.179					71.1	-81.3737
			71.2	-122.087					71.2	-81.7078
			71.3	-118.257					71.3	-79.5041
			71.4	-127.338					71.4	-80.241
			71.5	-119.377					71.5	-80.2947
			71.6	-124.533					71.6	-81.9889
			71.7	-120.101					71.7	-82.6703
			71.8	-120.133					71.8	-83.1439
			71.9	-119.714					71.9	-81.3766
			72	-121.387					72	-82.6707
			72.1	-1.88321					72.1	-78.9021
			72.2	-23.8698					72.2	-82.573
			72.3	-76.0883					72.3	-79.592
			72.4	-99.1733					72.4	-81.9257
			72.5	-44.2852					72.5	-81.8196
			72.6	-47.1478					72.6	-81.096
			72.7	-32.2205					72.7	-82.8398
			72.8	-57.8693					72.8	-81.2949
			72.9	-86.2656					72.9	-79.6342
			73	-115.236					73	-80.2998
			73.1	-128.988					73.1	-83.4457
			73.2	-129.172					73.2	-80.9209
			73.3	-116.466					73.3	-83.8908
			73.4	-123.484					73.4	-80.3067
			73.5	-131.384					73.5	-79.6279
			73.6	-126.891					73.6	-79.6651
			73.7	-125.447					73.7	-80.6469
			73.8	-126.734					73.8	-79.5392
			73.9	-123.987					73.9	-80.4055
			74	-129.639					74	-80.4889
			74.1	-130.589					74.1	-81.0793
			74.2	-124.579					74.2	-81.7793
			74.3	-133.32					74.3	-78.6481
			74.4	-130.598					74.4	-80.1672
			74.5	-132.033					74.5	-79.0505
			74.6	-128.15					74.6	-82.1386
			74.7	-122.898					74.7	-79.4135
			74.8	-128.011					74.8	-79.5529
			74.9	-126.391					74.9	-82.1357
			75	-130.644					75	-80.7565
			75.1	-130.59					75.1	-78.7293
			75.2	-132.119					75.2	-84.0769
			75.3	-131.133					75.3	-79.5678
			75.4	-130.899					75.4	-84.9625
			75.5	-131.268					75.5	-85.1426
			75.6	-127.583					75.6	-88.4198
			75.7	-123.792					75.7	-84.342
			75.8	-129.265					75.8	-83.132
			75.9	-125.848					75.9	-86.2373
			76	-127.29					76	-82.1698
			76.1	-127.722					76.1	-81.8534
			76.2	-129.369					76.2	-79.191
			76.3	-126.109					76.3	-83.4282
			76.4	-126.897					76.4	-77.5334
			76.5	-124.874					76.5	-81.919
			76.6	-128.832					76.6	-80.0922
			76.7	-129.362					76.7	-78.9366
			76.8	-123.61					76.8	-83.1058
			76.9	-124.833					76.9	-81.1827
			77	-120.689					77	-80.8907
			77.1	-131.338					77.1	-83.9737
			77.2	-124.5					77.2	-82.0191
			77.3	-124.453					77.3	-82.581
			77.4	-117.152					77.4	-82.7068
			77.5	-125.841					77.5	-85.177
			77.6	-118.308					77.6	-84.7589
			77.7	-123.012					77.7	-84.8225
			77.8	-123.695					77.8	-84.7514
			77.9	-120.771					77.9	-83.1502
			78	-128.436					78	-80.3861
			78.1	-125.032					78.1	-85.1949
			78.2	-121.476					78.2	-83.4868
			78.3	-124.538					78.3	-82.8868
			78.4	-121.481					78.4	-80.7101
			78.5	-121.679					78.5	-88.0555
			78.6	-138.037					78.6	-84.4077
			78.7	-127.982					78.7	-83.0222
			78.8	-120.998					78.8	-84.3859
			78.9	-122.655					78.9	-82.6182
			79	-123.216					79	-80.16
			79.1	-116.622					79.1	-85.0261
			79.2	-111.287					79.2	-82.7164
			79.3	-115.759					79.3	-81.8183
			79.4	-110.239					79.4	-81.3926
			79.5	-113.418					79.5	-83.1669
			79.6	-106.928					79.6	-81.1477
			79.7	-111.558					79.7	-82.6266
			79.8	-122.744					79.8	-82.5607
			79.9	-117.1					79.9	-82.7821
			80	-118.475					80	-82.6896
			80.1	-124.789					80.1	-80.3295
			80.2	-116.524					80.2	-81.882
			80.3	-111.456					80.3	-82.6028
			80.4	-214.227					80.4	-80.5792
			80.5	-173.001					80.5	-79.1988
			80.6	-161.07					80.6	-79.1137
			80.7	-192.089					80.7	-79.7974
			80.8	-235.113					80.8	-79.9845
			80.9	-299.82					80.9	-80.9623
			81	-197.899					81	-83.033
			81.1	-162.904					81.1	-82.2359
			81.2	-114.794					81.2	-85.1154
			81.3	-107.325					81.3	-80.5765
			81.4	-115.633					81.4	-82.4911
			81.5	-112.756					81.5	-84.0694
			81.6	-107.578					81.6	-82.9154
			81.7	-103.301					81.7	-85.3597
			81.8	-116.532					81.8	-84.3512
			81.9	-115.745					81.9	-80.2259
			82	-107.606					82	-84.504
			82.1	-99.144					82.1	-80.5739
			82.2	-100.613					82.2	-83.172
			82.3	-92.4229					82.3	-79.4371
			82.4	-90.1845					82.4	-82.2999
			82.5	-96.2507					82.5	-84.6983
			82.6	-91.5165					82.6	-81.7651
			82.7	-90.289					82.7	-82.614
			82.8	-87.5966					82.8	-82.7032
			82.9	-85.8034					82.9	-83.5832
			83	-84.1685					83	-82.8405
			83.1	-85.1156					83.1	-82.9026
			83.2	-78.8982					83.2	-82.4748
			83.3	-82.2039					83.3	-85.0466
			83.4	-76.32					83.4	-81.3826
			83.5	-79.2671					83.5	-81.1777
			83.6	-77.4442					83.6	-82.6028
			83.7	-72.9448					83.7	-79.2332
			83.8	-71.7806					83.8	-80.4155
			83.9	-70.7246					83.9	-82.778
			84	-68.078					84	-80.1731
			84.1	-71.5167					84.1	-78.2048
			84.2	-70.2762					84.2	-80.3544
			84.3	-65.9047					84.3	-82.4907
			84.4	-63.6634					84.4	-79.2698
			84.5	-61.8386					84.5	-82.0251
			84.6	-62.9125					84.6	-84.4668
			84.7	-59.6912					84.7	-79.2231
			84.8	-60.5721					84.8	-84.1955
			84.9	-59.2827					84.9	-82.6335
			85	-58.0636					85	-77.2197
			85.1	-59.5027					85.1	-84.7457
			85.2	-56.9851					85.2	-84.1652
			85.3	-54.639					85.3	-83.4227
			85.4	-54.1234					85.4	-52.8498
			85.5	-53.7191					85.5	-52.5021
			85.6	-53.2098					85.6	-32.503
			85.7	-51.6398					85.7	-63.8114
			85.8	-49.6507					85.8	-27.6521
			85.9	-50.0703					85.9	-42.3826
			86	-49.8142					86	-19.1806
			86.1	-45.7137					86.1	3.88954
			86.2	-47.721					86.2	-67.9798
			86.3	-45.9538					86.3	-26.5483
			86.4	-44.7444					86.4	15.8387
			86.5	-43.8058					86.5	-74.1629
			86.6	-44.3559					86.6	-73.5895
			86.7	-44.586					86.7	-75.9852
			86.8	-42.9925					86.8	-66.1182
			86.9	-42.6644					86.9	-60.9558
			87	-42.0218					87	-72.1253
			87.1	-42.3135					87.1	-78.4757
			87.2	-43.2297					87.2	-77.0444
			87.3	-40.1457					87.3	-78.8612
			87.4	-40.069					87.4	-80.578
			87.5	-40.1687					87.5	-77.0816
			87.6	-35.7515					87.6	-78.4067
			87.7	-38.1421					87.7	-76.7309
			87.8	-35.2952					87.8	-79.1308
			87.9	-38.0398					87.9	-75.6783
			88	-35.5162					88	-76.576
			88.1	-36.3598					88.1	-77.5015
			88.2	-35.337					88.2	-75.8097
			88.3	-34.4827					88.3	-76.4878
			88.4	-35.6359					88.4	-77.4497
			88.5	-35.0881					88.5	-75.7922
			88.6	-34.4099					88.6	-76.602
			88.7	-34.1341					88.7	-74.9172
			88.8	-33.7056					88.8	-76.064
			88.9	-34.4643					88.9	-77.2918
			89	-35.6279					89	-76.2858
			89.1	-32.0588					89.1	-79.4937
			89.2	-32.793					89.2	-77.0743
			89.3	-33.5493					89.3	-78.3551
			89.4	-34.3629					89.4	-76.9353
			89.5	-32.1932					89.5	-75.6784
			89.6	-33.1461					89.6	-76.1022
			89.7	-33.2241					89.7	-76.3095
			89.8	-31.9103					89.8	-74.9688
			89.9	-30.8495					89.9	-74.1928
			90	-30.6973					90	-76.2158
			90.1	-30.7193					90.1	-74.3865
			90.2	-31.0407					90.2	-72.4059
			90.3	-31.2922					90.3	-74.9332
			90.4	-29.642					90.4	-73.7927
			90.5	-28.6031					90.5	-74.5527
			90.6	-29.6086					90.6	-72.3342
			90.7	-28.0113					90.7	-73.1796
			90.8	-28.0807					90.8	-73.1748
			90.9	-26.9821					90.9	-72.9174
			91	-26.3909					91	-74.0624
			91.1	-28.1374					91.1	-73.8704
			91.2	-27.4283					91.2	-72.3594
			91.3	-28.9818					91.3	-73.04
			91.4	-27.3601					91.4	-72.0278
			91.5	-28.4735					91.5	-73.5844
			91.6	-29.2436					91.6	-73.35
			91.7	-27.6224					91.7	-74.0709
			91.8	-29.4791					91.8	-71.3181
			91.9	-27.5368					91.9	-72.3001
			92	-26.2649					92	-72.0236
			92.1	-28.0965					92.1	-72.2995
			92.2	-26.3892					92.2	-72.8439
			92.3	-27.4638					92.3	-71.9404
			92.4	-26.8768					92.4	-71.4054
			92.5	-26.576					92.5	-71.1534
			92.6	-27.2493					92.6	-72.4665
			92.7	-25.585					92.7	-71.9196
			92.8	-27.2915					92.8	-69.0479
			92.9	-26.5547					92.9	-69.4889
			93	-25.9744					93	-66.543
			93.1	-27.8783					93.1	-55.2209
			93.2	-26.2088					93.2	-46.9406
			93.3	-35.8973					93.3	-61.5893
			93.4	-27.3867					93.4	-27.3929
			93.5	-27.8721					93.5	-36.5587
			93.6	-26.4344					93.6	-32.6987
			93.7	-25.8819					93.7	-29.7335
			93.8	-26.4379					93.8	-41.4208
			93.9	-26.1411					93.9	-36.5397
			94	-27.4172					94	-50.2207
			94.1	-32.0686					94.1	-63.713
			94.2	-26.6292					94.2	-105.667
			94.3	-26.2575					94.3	-67.3619
			94.4	-28.8633					94.4	-150.666
			94.5	-24.3973					94.5	-170.895
			94.6	-25.6734					94.6	-224.794
			94.7	-25.5608					94.7	-190.245
			94.8	-27.401					94.8	-258.911
			94.9	-33.5276					94.9	-235.5
			95	-24.8372					95	-105.418
			95.1	-26.6402					95.1	-91.4571
			95.2	-25.5471					95.2	-66.4691
			95.3	-24.7304					95.3	-62.5378
			95.4	-25.5045					95.4	-62.9834
			95.5	-24.1438					95.5	-64.6051
			95.6	-25.2718					95.6	-61.8675
			95.7	-26.9415					95.7	-63.9684
			95.8	-25.0996					95.8	-64.3843
			95.9	-26.5957					95.9	-64.286
			96	-25.3372					96	-66.1103
			96.1	-24.1921					96.1	-63.3856
			96.2	-24.9061					96.2	-76.8655
			96.3	-24.809					96.3	-78.1501
			96.4	-23.2555					96.4	-69.0672
			96.5	-25.1559					96.5	-67.1113
			96.6	-24.636					96.6	-64.5376
			96.7	-24.1271					96.7	-64.7718
			96.8	-24.2323					96.8	-65.463
			96.9	-23.8213					96.9	-64.0279
			97	-24.6845					97	-64.9626
			97.1	-22.9719					97.1	-66.6261
			97.2	-26.2979					97.2	-66.0254
			97.3	-24.8329					97.3	-65.4991
			97.4	-22.9889					97.4	-63.6888
			97.5	-26.3385					97.5	-66.0952
			97.6	-25.2261					97.6	-64.9684
			97.7	-25.0186					97.7	-65.9114
			97.8	-24.8013					97.8	-64.2346
			97.9	-25.1971					97.9	-63.4149
			98	-26.0853					98	-61.7353
			98.1	-24.4325					98.1	-61.4683
			98.2	-23.1226					98.2	-63.3231
			98.3	-24.8828					98.3	-61.9841
			98.4	-23.6975					98.4	-61.784
			98.5	-25.1298					98.5	-60.1297
			98.6	-22.9684					98.6	-64.0261
			98.7	-24.5941					98.7	-59.8219
			98.8	-24.2159					98.8	-59.9328
			98.9	-24.1955					98.9	-60.0976
			99	-23.9924					99	-59.2275
			99.1	-23.0296					99.1	-59.8736
			99.2	-24.3094					99.2	-59.4257
			99.3	-21.0794					99.3	-58.4398
			99.4	-22.9914					99.4	-59.0337
			99.5	-22.4714					99.5	-57.7573
			99.6	-23.7506					99.6	-57.5312
			99.7	-23.7287					99.7	-58.8586
			99.8	-22.924					99.8	-57.6223
			99.9	-24.0361					99.9	-58.3359
			100	-23.6681					100	-55.5103
			100.1	-23.3746					100.1	-57.1116
			100.2	-24.5004					100.2	-54.7853
			100.3	-23.5551					100.3	-56.9685
			100.4	-25.6936					100.4	-55.3565
			100.5	-24.7537					100.5	-53.513
			100.6	-24.1818					100.6	-56.6474
			100.7	-23.0879					100.7	-54.4196
			100.8	-22.5763					100.8	-53.7215
			100.9	-23.609					100.9	-54.249
			101	-23.1864					101	-52.0478
			101.1	-22.5344					101.1	-52.0977
			101.2	-24.9893					101.2	-54.0979
			101.3	-24.1408					101.3	-53.0161
			101.4	-21.4945					101.4	-52.0618
			101.5	-20.8925					101.5	-53.2455
			101.6	-22.8175					101.6	-50.784
			101.7	-28.9245					101.7	-52.3566
			101.8	-19.4452					101.8	-52.3538
			101.9	-28.1835					101.9	-51.7028
			102	-23.1605					102	-50.9682
			102.1	-23.267					102.1	-50.4469
			102.2	-20.797					102.2	-49.6838
			102.3	-22.3419					102.3	-50.6533
			102.4	-23.7231					102.4	-51.2218
			102.5	-22.7348					102.5	-50.1503
			102.6	-22.4259					102.6	-50.3999
			102.7	-22.0145					102.7	-49.1266
			102.8	-22.5756					102.8	-48.1221
			102.9	-20.5729					102.9	-47.7855
			103	-22.8464					103	-49.2666
			103.1	-23.4172					103.1	-48.4912
			103.2	-23.846					103.2	-48.2998
			103.3	-9.10691					103.3	-48.1813
			103.4	-23.2825					103.4	-48.5854
			103.5	11.6584					103.5	-47.2318
			103.6	7.03231					103.6	-47.3553
			103.7	-19.1697					103.7	-47.04
			103.8	66.4023					103.8	-45.7406
			103.9	48.1266					103.9	-46.2996
			104	16.8961					104	-47.0809
			104.1	3.36363					104.1	-46.1225
			104.2	7.0265					104.2	-47.0885
			104.3	17.0811					104.3	-45.899
			104.4	65.2351					104.4	-44.9061
			104.5	-17.3639					104.5	-45.6949
			104.6	-19.7811					104.6	-45.5642
			104.7	-28.7162					104.7	-44.2718
			104.8	-8.356					104.8	-46.6319
			104.9	-8.79379					104.9	-44.7591
			105	-18.884					105	-44.0652
			105.1	-18.4493					105.1	-45.2943
			105.2	-19.7667					105.2	-45.071
			105.3	-21.9087					105.3	-43.3895
			105.4	-20.6282					105.4	-42.6994
			105.5	-20.512					105.5	-44.8993
			105.6	-19.2916					105.6	-44.3824
			105.7	-20.7769					105.7	-45.0307
			105.8	-20.6113					105.8	-42.0039
			105.9	-23.4254					105.9	-42.3492
			106	-26.1108					106	-42.3808
			106.1	-20.2252					106.1	-39.8264
			106.2	-17.9156					106.2	-43.7196
			106.3	-19.664					106.3	-41.8333
			106.4	-18.3677					106.4	-41.3567
			106.5	-17.102					106.5	-43.407
			106.6	-21.3697					106.6	-41.1825
			106.7	-19.1745					106.7	-42.4177
			106.8	-19.7962					106.8	-41.6293
			106.9	-19.1713					106.9	-41.8402
			107	-19.4466					107	-40.4307
			107.1	-18.7395					107.1	-43.1746
			107.2	-19.9581					107.2	-40.4826
			107.3	-19.2877					107.3	-40.8837
			107.4	-17.7988					107.4	-40.7518
			107.5	-19.8081					107.5	-41.2046
			107.6	-19.1962					107.6	-40.9602
			107.7	-21.2687					107.7	-40.2191
			107.8	-20.676					107.8	-40.0106
			107.9	-20.0005					107.9	-39.1562
			108	-19.7588					108	-39.3264
			108.1	-19.3866					108.1	-38.8167
			108.2	-19.5273					108.2	-38.8448
			108.3	-19.778					108.3	-40.1716
			108.4	-18.9354					108.4	-39.3003
			108.5	-20.4031					108.5	-38.0372
			108.6	-19.937					108.6	-38.5399
			108.7	-21.1754					108.7	-38.2962
			108.8	-20.2024					108.8	-39.4351
			108.9	-19.6091					108.9	-39.1144
			109	-19.2496					109	-39.0401
			109.1	-19.2898					109.1	-38.374
			109.2	-18.2687					109.2	-38.9643
			109.3	-24.9423					109.3	-37.0306
			109.4	-19.972					109.4	-37.9361
			109.5	-19.8871					109.5	-37.8031
			109.6	-19.2111					109.6	-36.3722
			109.7	-21.5101					109.7	-37.2123
			109.8	-22.3609					109.8	-37.5281
			109.9	-21.6113					109.9	-36.8953
			110	-26.2931					110	-36.7719
			110.1	-20.8636					110.1	-37.4962
			110.2	-47.1847					110.2	-37.4654
			110.3	-21.1826					110.3	-37.5999
			110.4	-20.5749					110.4	-37.5724
			110.5	-21.3813					110.5	-37.9052
			110.6	-21.5616					110.6	-36.5707
			110.7	-22.3908					110.7	-36.4706
			110.8	-21.9084					110.8	-36.6347
			110.9	-22.434					110.9	-37.8273
			111	-23.9973					111	-36.4157
			111.1	-27.2368					111.1	-36.1995
			111.2	-27.6999					111.2	-37.4206
			111.3	-33.1974					111.3	-36.673
			111.4	-26.9083					111.4	-36.2168
			111.5	-22.991					111.5	-36.5706
			111.6	-24.8253					111.6	-35.98
			111.7	-24.5966					111.7	-36.502
			111.8	-22.9092					111.8	-36.3567
			111.9	-27.5905					111.9	-35.3411
			112	-26.897					112	-36.6287
			112.1	-30.721					112.1	-34.6799
			112.2	-19.4639					112.2	-37.4421
			112.3	-17.617					112.3	-36.5994
			112.4	-17.2653					112.4	-36.5453
			112.5	-124.548					112.5	-34.9671
			112.6	-64.779					112.6	-35.2634
			112.7	-81.2387					112.7	-35.8423
			112.8	-120.555					112.8	-34.808
			112.9	-136.066					112.9	-35.7048
			113	-234.835					113	-36.0941
			113.1	-145.172					113.1	-35.1493
			113.2	-171.296					113.2	-33.7302
			113.3	-221.215					113.3	-34.8416
			113.4	-239.699					113.4	-34.4609
			113.5	-255.154					113.5	-33.6017
			113.6	-269.645					113.6	-34.5342
			113.7	-277.61					113.7	-35.7254
			113.8	-283.341					113.8	-34.6935
			113.9	-282.092					113.9	-34.0144
			114	-253.763					114	-34.3696
			114.1	-243.235					114.1	-34.8597
			114.2	-224.379					114.2	-33.1772
			114.3	-222.599					114.3	-36.0273
			114.4	-217.994					114.4	-34.6
			114.5	-211.486					114.5	-33.9165
			114.6	-202.757					114.6	-35.2319
			114.7	-199.56					114.7	-34.066
			114.8	-186.809					114.8	-34.155
			114.9	-187.94					114.9	-33.7137
			115	-174.465					115	-33.9395
			115.1	-174.692					115.1	-35.4289
			115.2	-177.656					115.2	-34.4956
			115.3	-171.742					115.3	-34.6802
			115.4	-179.788					115.4	-34.3546
			115.5	-175.519					115.5	-34.4567
			115.6	-176.647					115.6	-34.1006
			115.7	-172.392					115.7	-33.1014
			115.8	-167.219					115.8	-33.3428
			115.9	-169.554					115.9	-34.2091
			116	-167.475					116	-34.0616
			116.1	-164.087					116.1	-33.7878
			116.2	-165.871					116.2	-33.0659
			116.3	-166.954					116.3	-33.7846
			116.4	-165.503					116.4	-33.8864
			116.5	-165.801					116.5	-34.5061
			116.6	-168.595					116.6	-34.3647
			116.7	-165.131					116.7	-33.3136
			116.8	-165.688					116.8	-32.8691
			116.9	-168.319					116.9	-32.5015
			117	-166.04					117	-31.9447
			117.1	-163.512					117.1	-32.9319
			117.2	-176.151					117.2	-32.5006
			117.3	-165.64					117.3	-31.609
			117.4	-168.065					117.4	-31.609
			117.5	-174.052					117.5	-32.298
			117.6	-167.486					117.6	-32.7179
			117.7	-173.435					117.7	-33.6567
			117.8	-166.828					117.8	-32.3261
			117.9	-164.942					117.9	-33.1861
			118	-166.361					118	-36.5396
			118.1	-169.058					118.1	-33.3848
			118.2	-170.982					118.2	-32.8238
			118.3	-175.222					118.3	-43.5572
			118.4	-170.411					118.4	-33.4093
			118.5	-173.597					118.5	-32.1653
			118.6	-169.27					118.6	-33.0854
			118.7	-172.552					118.7	-32.7371
			118.8	-168.961					118.8	-31.4578
			118.9	-175.292					118.9	-34.9397
			119	-170.911
			119.1	-179.61
			119.2	-174.577
			119.3	-177.515
			119.4	-176.962
			119.5	-168.886
			119.6	-180.187
			119.7	-176.084
			119.8	-179.986
			119.9	-176.42
			120	-172.707
			120.1	-174.87
			120.2	-185.515
			120.3	-176.684
			120.4	-169.85
			120.5	-175.876
			120.6	-180.289
			120.7	-182.993
			120.8	-180.911
			120.9	-177.04
			121	-178.161
			121.1	-181.225
			121.2	-177.293
			121.3	-184.601
			121.4	-183.664
			121.5	-178.824
			121.6	-184.188
			121.7	-188.525
			121.8	-188.35
			121.9	-185.986
			122	-192.734
			122.1	-185.711
			122.2	-187.606
			122.3	-182.552
			122.4	-194.093
			122.5	-189.138
			122.6	-187.127
			122.7	-183.837
			122.8	-186.131
			122.9	-182.134
			123	-185.786
			123.1	-185.181
			123.2	-186.255
			123.3	-194.256
			123.4	-196.224
			123.5	-188.58
			123.6	-192.381
			123.7	-189.326
			123.8	-184.041
			123.9	-188.445
			124	-189.624
			124.1	-188.722
			124.2	-190.996
			124.3	-186.736
			124.4	-195.377
			124.5	-196.244
			124.6	-195.984
			124.7	-197.705
			124.8	-186.267
			124.9	-193.058
			125	-200.729
			125.1	-193.245
			125.2	-191.177
			125.3	-195.98
			125.4	-193.548
			125.5	-188.673
			125.6	-199.244
			125.7	-187.221
			125.8	-194.3
			125.9	-191.889
			126	-203.745
			126.1	-199.585
			126.2	-197.489
			126.3	-193.072
			126.4	-202.912
			126.5	-198.405
			126.6	-198.176
			126.7	-200.865
			126.8	-197.219
			126.9	-199.293
			127	-186.97
			127.1	-197.901
			127.2	-201.115
			127.3	-193.609
			127.4	-202.05
			127.5	-206.761
			127.6	-194.895
			127.7	-196.861
			127.8	-198.642
			127.9	-206.879
			128	-196.528
			128.1	-195.158
			128.2	-199.89
			128.3	-198.355
			128.4	-191.41
			128.5	-189.4
			128.6	-192.513
			128.7	-198.798
			128.8	-201.146
			128.9	-203.833
			129	-206.779
			129.1	-206.396
			129.2	-210.262
			129.3	-198.699
			129.4	-207.032
			129.5	-202.768
			129.6	-206.993
			129.7	-209.912
			129.8	-199.989
			129.9	-198.006
			130	-216.779
			130.1	-205.246
			130.2	-199.422
			130.3	-212.612
			130.4	-212.812
			130.5	-200.365
			130.6	-204.841
			130.7	-205.551
			130.8	-207.472
			130.9	-205.879
			131	-200.655
			131.1	-206.826
			131.2	-200.942
			131.3	-206.363
			131.4	-212.405
			131.5	-208.463
			131.6	-204.418
			131.7	-203.344
			131.8	-204.129
			131.9	-196.519
			132	-204.649
			132.1	-205.51
			132.2	-205.846
			132.3	-206.739
			132.4	-220.382
			132.5	-210.662
			132.6	-161.924
			132.7	-155.082
			132.8	-137.362
			132.9	-127.756
			133	-146.209
			133.1	-165.086
			133.2	-134.867
			133.3	-147.715
			133.4	-164.391
			133.5	-207.665
			133.6	-210.002
			133.7	-207.454
			133.8	-196.474
			133.9	-217.497
			134	-215.099
			134.1	-209.315
			134.2	-200.453
			134.3	-216.988
			134.4	-211.979
			134.5	-204.329
			134.6	-212.215
			134.7	-213.364
			134.8	-208.681
			134.9	-215.206
			135	-206.731
			135.1	-203.85
			135.2	-204.755
			135.3	-207.942
			135.4	-205.398
			135.5	-214.885
			135.6	-208.027
			135.7	-215.626
			135.8	-213.431
			135.9	-211.093
			136	-210.822
			136.1	-209.68
			136.2	-213.111
			136.3	-212.45
			136.4	-212.797
			136.5	-211.998
			136.6	-208.946
			136.7	-215.459
			136.8	-211.563
			136.9	-214.525
			137	-210.896
			137.1	-215.416
			137.2	-221.912
			137.3	-210.33
			137.4	-210.764
			137.5	-228.043
			137.6	-213.975
			137.7	-214.23
			137.8	-212.801
			137.9	-220.279
			138	-222.759
			138.1	-226.172
			138.2	-221.437
			138.3	-210.14
			138.4	-211.463
			138.5	-221.366
			138.6	-224.869
			138.7	-219.828
			138.8	-216.988
			138.9	-218.771
			139	-225.381
			139.1	-220.266
			139.2	-222.316
			139.3	-223.276
			139.4	-228.815
			139.5	-220.052
			139.6	-225.436
			139.7	-215.335
			139.8	-223.396
			139.9	-219.535
			140	-221.739
			140.1	-230.275
			140.2	-225.601
			140.3	-227.236
			140.4	-226.067
			140.5	-220.047
			140.6	-221.322
			140.7	-223.807
			140.8	-218.124
			140.9	-217.44
			141	-229.752
			141.1	-221.664
			141.2	-219.982
			141.3	-225.879
			141.4	-224.712
			141.5	-222.365
			141.6	-220.428
			141.7	-225.483
			141.8	-225.67
			141.9	-220.908
			142	-225.557
			142.1	-233.196
			142.2	-220.859
			142.3	-220.775
			142.4	-226.507
			142.5	-221.75
			142.6	-236.47
			142.7	-236.347
			142.8	-242.773
			142.9	-246.967
			143	-242.848
			143.1	-247.684
			143.2	-243.843
			143.3	-251.61
			143.4	-249.24
			143.5	-254.891
			143.6	-232.788
			143.7	-232.32
			143.8	-232.497
			143.9	-293.456
			144	-280.709
			144.1	-290.658
			144.2	-355.995
			144.3	-438.257
			144.4	-603.912
			144.5	-306.09
			144.6	-322.569
			144.7	-324.756
			144.8	-349.341
			144.9	-349
			145	-326.77
			145.1	-311.653
			145.2	-312.519
			145.3	-303.538
			145.4	-296.056
			145.5	-295.225
			145.6	-298.361
			145.7	-287.837
			145.8	-289.662
			145.9	-285.175
			146	-290.6
			146.1	-289.374
			146.2	-296.105
			146.3	-278.899
			146.4	-288.622
			146.5	-286.022
			146.6	-281.714
			146.7	-287.128
			146.8	-284.652
			146.9	-292.581
			147	-288.047
			147.1	-286.925
			147.2	-284.054
			147.3	-294.028
			147.4	-287.488
			147.5	-293.072
			147.6	-295.435
			147.7	-286.446
			147.8	-289.234
			147.9	-294.44
			148	-288.056
			148.1	-296.05
			148.2	-281.705
			148.3	-292.138
			148.4	-291.617
			148.5	-286.566
			148.6	-290.958
			148.7	-289.299
			148.8	-291.683
			148.9	-288.618
			149	-291.088
			149.1	-289.154
			149.2	-291.308
			149.3	-292.078
			149.4	-289.72
			149.5	-294.054
			149.6	-288.632
			149.7	-301.139
			149.8	-280.149
			149.9	-288.876
			150	-296.699
			150.1	-291.64
			150.2	-292.566
			150.3	-286.119
			150.4	-292.572
			150.5	-286.713
			150.6	-299.938
			150.7	-292.348
			150.8	-288.676
			150.9	-293.857
			151	-296.216
			151.1	-290.454
			151.2	-300.937
			151.3	-292.578
			151.4	-287.197
			151.5	-295.396
			151.6	-295.499
			151.7	-295.635
			151.8	-294.688
			151.9	-299.858
			152	-295.469
			152.1	-298.404
			152.2	-290.565
			152.3	-297.021
			152.4	-292.951
			152.5	-294.667
			152.6	-295.093
			152.7	-297.612
			152.8	-286.854
			152.9	-298.139
			153	-292.705
			153.1	-297.008
			153.2	-294.101
			153.3	-302.559
			153.4	-304.584
			153.5	-295.342
			153.6	-293.427
			153.7	-297.906
			153.8	-305.466
			153.9	-297.306
			154	-300.647
			154.1	-298.613
			154.2	-287.43
			154.3	-297.796
			154.4	-302.297
			154.5	-300.921
			154.6	-294.647
			154.7	-295.021
			154.8	-302.683
			154.9	-297.108
			155	-299.949
			155.1	-301.254
			155.2	-304.113
			155.3	-291.223
			155.4	-302.279
			155.5	-297.35
			155.6	-299.298
			155.7	-300.444
			155.8	-297.366
			155.9	-299.705
			156	-293.621
			156.1	-299.673
			156.2	-301.034
			156.3	-305.882
			156.4	-310.377
			156.5	-293.107
			156.6	-296.811
			156.7	-306.368
			156.8	-301.346
			156.9	-306.288
			157	-300.84
			157.1	-293.434
			157.2	-302.542
			157.3	-306.547
			157.4	-304.032
			157.5	-303.695
			157.6	-301.719
			157.7	-303.398
			157.8	-302.289
			157.9	-300.06
			158	-305.666
			158.1	-303.576
			158.2	-309.102
			158.3	-304.659
			158.4	-305.31
			158.5	-307.745
			158.6	-303.598
			158.7	-298.992
			158.8	-298.159
			158.9	-299.906
			159	-300.118
			159.1	-296.529
			159.2	-295.213
			159.3	-308.448
			159.4	-308.047
			159.5	-300.398
			159.6	-298.732
			159.7	-304.182
			159.8	-306.834
			159.9	-305.73
			160	-305.958
			160.1	-305.093
			160.2	-306.922
			160.3	-310.785
			160.4	-301.645
			160.5	-307.868
			160.6	-291.871
			160.7	-291.422
			160.8	-281.016
			160.9	-294.974
			161	-297.022
			161.1	-302.56
			161.2	-306.316
			161.3	-299.908
			161.4	-298.545
			161.5	-300.149
			161.6	-297.696
			161.7	-308.182
			161.8	-298.352
			161.9	-117.57
			162	-212.425
			162.1	-215.194
			162.2	-261.081
			162.3	-243.95
			162.4	-272.7
			162.5	-198.135
			162.6	-304.019
			162.7	-295.09
			162.8	-317.509
			162.9	-304.237
			163	-276.792
			163.1	-299.281
			163.2	-299.861
			163.3	-297.31
			163.4	-301.171
			163.5	-294.116
			163.6	-295.04
			163.7	-303.161
			163.8	-294.024
			163.9	-304.999
			164	-302.442
			164.1	-304.35
			164.2	-304.246
			164.3	-299.855
			164.4	-298.807
			164.5	-312.371
			164.6	-296.452
			164.7	-300.192
			164.8	-304.194
			164.9	-297.302
			165	-302.406
			165.1	-309.492
			165.2	-307.048
			165.3	-300.104
			165.4	-307.48
			165.5	-306.435
			165.6	-315.191
			165.7	-311.159
			165.8	-299.176
			165.9	-309.855
			166	-308.894
			166.1	-303.786
			166.2	-301.656
			166.3	-304.102
			166.4	-301.696
			166.5	-305.562
			166.6	-304.521
			166.7	-304.34
			166.8	-309.746
			166.9	-307.405
			167	-297.933
			167.1	-303.445
			167.2	-305.002
			167.3	-310.257
			167.4	-310.42
			167.5	-304.312
			167.6	-313.785
			167.7	-310.014
			167.8	-294.365
			167.9	-302.113
			168	-307.64
			168.1	-317.675
			168.2	-310.825
			168.3	-312.576
			168.4	-322.135
			168.5	-316.991
			168.6	-324.102
			168.7	-320.335
			168.8	-328.826
			168.9	-301.63
			169	-325.508
			169.1	-304.991
			169.2	-307.81
			169.3	-466.521
			169.4	-351.121
			169.5	-323.531
			169.6	-312.861
			169.7	-322.966
			169.8	-318.919
			169.9	-323.633
			170	-317.531
			170.1	-319.814
			170.2	-328.962
			170.3	-328.385
			170.4	-321.757
			170.5	-324.251
			170.6	-326.294
			170.7	-322.436
			170.8	-325.303
			170.9	-317.768
			171	-316.977
			171.1	-320.344
			171.2	-319.594
			171.3	-310.909
			171.4	-319.922
			171.5	-306.173
			171.6	-320.06
			171.7	-308.323
			171.8	-315.762
			171.9	-312.209
			172	-314.097
			172.1	-311.378
			172.2	-312.676
			172.3	-313.65
			172.4	-320.826
			172.5	-317.587
			172.6	-323.597
			172.7	-317.529
			172.8	-308.084
			172.9	-322.83
			173	-317.359
			173.1	-323.038
			173.2	-309.773
			173.3	-313.373
			173.4	-324.312
			173.5	-320.317
			173.6	-316.093
			173.7	-324.143
			173.8	-318.295
			173.9	-320.097
			174	-323.412
			174.1	-323.696
			174.2	-326.684
			174.3	-324.651
			174.4	-310.254
			174.5	-326.989
			174.6	-314.904
			174.7	-323.448
			174.8	-325.984
			174.9	-330.913
			175	-329.135
			175.1	-323.19
			175.2	-325.376
			175.3	-314.992
			175.4	-333.024
			175.5	-324.958
			175.6	-328.564
			175.7	-315.842
			175.8	-319.961
			175.9	-322.587
			176	-330.984
			176.1	-317.048
			176.2	-324.731
			176.3	-326.725
			176.4	-325.101
			176.5	-317.545
			176.6	-316.218
			176.7	-322.539
			176.8	-317.428
			176.9	-322.446
			177	-328.141
			177.1	-319.069
			177.2	-319.069
			177.3	-319.155
			177.4	-320.581
			177.5	-324.385
			177.6	-333.801
			177.7	-326.567
			177.8	-325.353
			177.9	-319.664
			178	-328.671
			178.1	-316.023
			178.2	-324.564
			178.3	-322.798
			178.4	-320.21
			178.5	-322.748
			178.6	-326.594
			178.7	-325.094
			178.8	-330.59
			178.9	-329.71
			179	-324.967
			179.1	-330.469
