# Supplementary material for: The fluoride permeation pathway and anion recognition in Fluc family fluoride channels
Source: eLife. 2021 Jul 12;10:e69482. doi: 10.7554/eLife.69482 (PMC8315801; doi:10.7554/eLife.69482)
Supplement: Figure 3—source data 5. [file elife-69482-fig3-data5.xlsx]

## Sheet: Sheet1
	Monobody block, reported as percent block
[Mb], nM
	T39S						[Mb], nM		Y104F
0	0	0	0				0	0	0	0	0	0
33	0	0	0				100	8	9	7	2	6
100	5	4	0				300	14	22	12	11	10
300	49	37	46				1000	30		20	32	21
1000	91	84	69				3000	36		26	44	24
3000	91	84	84
