# Supplementary material for: The fluoride permeation pathway and anion recognition in Fluc family fluoride channels
Source: eLife. 2021 Jul 12;10:e69482. doi: 10.7554/eLife.69482 (PMC8315801; doi:10.7554/eLife.69482)
Supplement: Figure 4—source data 1. [file elife-69482-fig4-data1.xlsx]

## Sheet: Sheet1
[OCN], mM	Bilayer 1	Bilayer 2	Bilayer 3	[NO3], mM	Bilayer 1	Bilayer 2	Bilayer 3	[Cl-] mM	Bilayer 1	Bilayer 2	Bilayer 3	[SCN-], mM	Bilayer 1	Bilayer 2
0	0	0	0	0	0	0	0	0	0	0	0	0	0	0
3	0.2			10	0.15	0.08	0.12	30	0.09			30	0.43	0.48
5				30	0.33	0.14	0.36	57		0.2	0.2	100	0.58	0.67
5				100	0.41	0.26	0.37	70	0.22			300	0.76	0.81
5.75	0.22			300	0.625	0.53	0.7	114		0.24	0.28	500		0.88
10		0.4	0.4	500	0.7	0.66	0.77	143	0.3
17	0.42			700	0.75	0.76	0.81	171		0.38	0.3
20	0.45							345			0.45
30		0.52	0.51					515			0.56
50	0.66							685			0.63
54	0.64							860			0.6
100		0.67
170			0.78
		Anion block of WT Bpe channels
