# Supplementary material for: The fluoride permeation pathway and anion recognition in Fluc family fluoride channels
Source: eLife. 2021 Jul 12;10:e69482. doi: 10.7554/eLife.69482 (PMC8315801; doi:10.7554/eLife.69482)
Supplement: Figure 4—source data 2. [file elife-69482-fig4-data2.xlsx]

## Sheet: Sheet1
	OCN WT		Cl WT		OCN E88Q		Cl E88Q					Representative trace:
[anion], mM	PB (mean)	St. dev.	PB (mean)	St. dev.	PB (mean)	St. dev.	PB (mean)	St. dev.
0	0	0										Bpe-S83C oriented, OCN titration
1	0.045	0.005
3	0.19	0.00408248
10	0.515	0.0466369										0		-60.3981
30	0.931	0.012										0.1		-62.2963
60	0.9895	0.0025										0.2		-57.4
0			0	0	0	0	0	0				0.3		-60.8529
10			0.05	0.0147196	0.286667	0.107134	0.095	0.00957427				0.4		-60.4833
30			0.105	0.045	0.416667	0.0949269	0.188	0.0182757				0.5		-61.9897
100			0.1825	0.0344903	0.543333	0.111704	0.353333	0.0122927				0.6		-59.8171
300			0.365	0.0567891	0.885714	0.0499932	0.5175	0.0197379				0.7		-59.9625
												0.8		-62.3848
												0.9		-60.8517
												1		-64.6866
												1.1		-62.4877
												1.2		-61.7322
												1.3		-55.925
												1.4		-61.4681
												1.5		-63.5043
E88Q (reported as percent blocked)												1.6		-62.1434
Cl, mM	Bilayer 1	Bilayer 2	Bilayer 3	Bilayer 4	Bilayer 5	Bilayer 6						1.7		-64.546
10	10	8	8	12								1.8		-65.4237
30	20	19	23	12	20							1.9		-62.2132
100	36	31	33	38	35	39						2		-62.0531
300	55	55	50	47								2.1		-60.2645
												2.2		-58.4707
												2.3		-59.3883
												2.4		-63.3687
WT (reported as percent blocked)												2.5		-63.8909
OCN, mM	Bilayer 1	Bilayer 2	Bilayer 3	Bilayer 4								2.6		-61.705
0	0	0	0	0								2.7		-62.5725
1	4	4	6	4								2.8		-60.735
3	18	19	20	19								2.9		-60.6319
10	62	40	49	55								3		-62.8803
30	95	94.5	93	90								3.1		-59.7615
60	99.2	98.7										3.2		-58.9881
												3.3		-62.9197
												3.4		-58.2946
WT (reported as percent blocked)												3.5		-60.7944
Cl, mM	Bilayer 1	Bilayer 2	Bilayer 3	Bilayer 4								3.6		-62.5813
10	3	7	2	8								3.7		-62.0899
30	6	15										3.8		-63.8824
100	23	21	8	21								3.9		-61.0409
300	21	45	45	35								4		-62.8643
												4.1		-64.2883
												4.2		-61.4898
E88Q (reported as percent blocked)												4.3		-58.9331
OCN, mM	Bilayer 1	Bilayer 2	Bilayer 3	Bilayer 4	Bilayer 5	Bilayer 6	Bilayer 7					4.4		-57.4845
10	48	11	27									4.5		-56.6351
30	54	23	48									4.6		-63.3435
100	66	32	65									4.7		-62.1711
300	95	60	85	96	92	97	95					4.8		-62.4884
												4.9		-60.3804
												5		-59.3878
												5.1		-65.9564
												5.2		-62.8949
												5.3		-62.9111
												5.4		-63.1151
												5.5		-66.6882
												5.6		-60.7687
												5.7		-62.0594
												5.8		-57.8736
												5.9		-62.4875
												6		-58.9667
												6.1		-61.4484
												6.2		-64.3249
												6.3		-63.1142
												6.4		-59.5527
												6.5		-61.6429
												6.6		-62.297
												6.7		-59.4969
												6.8		-59.8639
												6.9		-62.4795
												7		-62.8897
												7.1		-62.0142
												7.2		-59.8745
												7.3		-61.9364
												7.4		-59.7727
												7.5		-63.4099
												7.6		-60.0662
												7.7		-57.0369
												7.8		-61.4523
												7.9		-60.1435
												8		-59.0272
												8.1		-67.6205
												8.2		-61.9546
												8.3		-62.7404
												8.4		-59.2639
												8.5		-63.0485
												8.6		-61.5468
												8.7		-59.3719
												8.8		-61.1609
												8.9		-61.2882
												9		-61.7532
												9.1		-61.7456
												9.2		-63.292
												9.3		-63.2551
												9.4		-62.8961
												9.5		-60.4233
												9.6		-58.9558
												9.7		-61.488
												9.8		-61.7539
												9.9		-64.4006
												10		-59.1612
												10.1		-64.5093
												10.2		-58.7683
												10.3		-58.9909
												10.4		-60.2633
												10.5		-56.2887
												10.6		-57.6239
												10.7		-62.7022
												10.8		-63.5809
												10.9		-61.8364
												11		-59.8453
												11.1		-62.313
												11.2		-63.6434
												11.3		-58.661
												11.4		-63.3036
												11.5		-61.6424
												11.6		-59.7985
												11.7		-63.1333
												11.8		-59.7179
												11.9		-60.5507
												12		-59.5852
												12.1		-61.4633
												12.2		-62.6086
												12.3		-61.5414
												12.4		-62.7123
												12.5		-59.1673
												12.6		-59.0062
												12.7		-60.7951
												12.8		-62.3391
												12.9		-58.8893
												13		-63.6046
												13.1		-56.4385
												13.2		-64.9057
												13.3		-58.3388
												13.4		-65.4543
												13.5		-58.5363
												13.6		-67.3171
												13.7		-57.0147
												13.8		-55.2502
												13.9		-59.3734
												14		-62.2862
												14.1		-60.0979
												14.2		-60.552
												14.3		-56.9256
												14.4		-62.3371
												14.5		-58.9347
												14.6		-55.5999
												14.7		-53.1651
												14.8		-46.6816
												14.9		-49.5339
												15		-43.9386
												15.1		-41.8111
												15.2		-38.9641
												15.3		-36.0523
												15.4		-43.2728
												15.5		-37.006
												15.6		-54.995
												15.7		-46.2483
												15.8		-60.0531
												15.9		-54.8957
												16		-54.12
												16.1		-57.4401
												16.2		-55.8654
												16.3		-61.555
												16.4		-71.6416
												16.5		-125.702
												16.6		-104.68
												16.7		-65.8982
												16.8		-65.3984
												16.9		-62.2085
												17		-60.5821
												17.1		-56.3432
												17.2		-61.2049
												17.3		-61.4755
												17.4		-58.5149
												17.5		-59.4508
												17.6		-56.5044
												17.7		-64.0083
												17.8		-65.0826
												17.9		-59.9444
												18		-60.4014
												18.1		-62.5777
												18.2		-62.9932
												18.3		-58.0655
												18.4		-59.1272
												18.5		-62.6618
												18.6		-61.5365
												18.7		-59.158
												18.8		-59.9563
												18.9		-61.2078
												19		-61.4568
												19.1		-61.7949
												19.2		-61.5316
												19.3		-56.114
												19.4		-44.0359
												19.5		-18.4063
												19.6		-1.33559
												19.7		20.57
												19.8		-49.7705
												19.9		-43.335
												20		-36.131
												20.1		-49.5704
												20.2		-45.5323
												20.3		-61.2387
												20.4		132.867
												20.5		497.307
												20.6		839.002
												20.7		-64.1087
												20.8		-1155.25
												20.9		-548.578
												21		-31.4407
												21.1		1062.41
												21.2		607.862
												21.3		-53.0099
												21.4		-1397.91
												21.5		-60.3775
												21.6		83.569
												21.7		924.064
												21.8		-50.3813
												21.9		-1402.01
												22		-92.3767
												22.1		157.132
												22.2		1290.57
												22.3		-54.8501
												22.4		-1260.01
												22.5		-186.328
												22.6		-34.1592
												22.7		1283.85
												22.8		-22.8521
												22.9		-933.038
												23		-1354.09
												23.1		-53.0696
												23.2		-58.7318
												23.3		-71.4971
												23.4		-129.954
												23.5		-157.953
												23.6		-116.138
												23.7		-71.5332
												23.8		-59.0226
												23.9		-53.0682
												24		-52.2534
												24.1		-55.7493
												24.2		-52.8788
												24.3		-54.1045
												24.4		-55.8389
												24.5		-55.8926
												24.6		-56.1702
												24.7		-52.3622
												24.8		-57.1649
												24.9		-52.9504
												25		-53.5459
												25.1		-58.1297
												25.2		-58.4146
												25.3		-53.5684
												25.4		-54.6557
												25.5		-59.8419
												25.6		-56.9116
												25.7		-57.477
												25.8		-58.8987
												25.9		-56.7647
												26		-58.4676
												26.1		-52.782
												26.2		-53.1331
												26.3		-58.1804
												26.4		-54.9391
												26.5		-52.9268
												26.6		-58.0308
												26.7		-59.3443
												26.8		-52.3456
												26.9		-58.5221
												27		-54.1055
												27.1		-56.0135
												27.2		-56.1341
												27.3		-53.8701
												27.4		-58.9644
												27.5		-56.0836
												27.6		-57.0087
												27.7		-57.5812
												27.8		-55.81
												27.9		-57.9809
												28		-54.3138
												28.1		-57.2417
												28.2		-56.4338
												28.3		-56.2088
												28.4		-58.1062
												28.5		-57.2554
												28.6		-56.9146
												28.7		-56.6614
												28.8		-58.1581
												28.9		-55.3271
												29		-58.8332
												29.1		-55.3736
												29.2		-56.8216
												29.3		-54.7175
												29.4		-57.2513
												29.5		-57.5782
												29.6		-55.5042
												29.7		-56.0257
												29.8		-54.1474
												29.9		-58.0271
												30		-58.5886
												30.1		-55.0844
												30.2		-56.9264
												30.3		-55.1805
												30.4		-55.3705
												30.5		-57.3093
												30.6		-56.1681
												30.7		-53.6047
												30.8		-55.724
												30.9		-58.4437
												31		-58.5584
												31.1		-54.8292
												31.2		-57.8198
												31.3		-57.4169
												31.4		-55.9276
												31.5		-56.1169
												31.6		-55.7356
												31.7		-64.2885
												31.8		-59.06
												31.9		-57.2379
												32		-58.0867
												32.1		-60.0883
												32.2		-58.0568
												32.3		-60.9679
												32.4		-55.4148
												32.5		-57.194
												32.6		-58.7961
												32.7		-58.8614
												32.8		-59.523
												32.9		-56.8963
												33		-56.8525
												33.1		-56.6295
												33.2		-54.3767
												33.3		-55.7818
												33.4		-54.3826
												33.5		-53.8103
												33.6		-58.2544
												33.7		-53.1561
												33.8		-54.9473
												33.9		-58.2728
												34		-55.7134
												34.1		-55.2798
												34.2		-53.0077
												34.3		-60.5807
												34.4		-56.234
												34.5		-56.8689
												34.6		-55.7507
												34.7		-58.2978
												34.8		-56.6378
												34.9		-55.6915
												35		-57.3865
												35.1		-59.0018
												35.2		-58.6533
												35.3		-61.0801
												35.4		-56.449
												35.5		-55.8042
												35.6		-56.7694
												35.7		-55.1395
												35.8		-56.7721
												35.9		-60.8362
												36		-57.1285
												36.1		-55.4191
												36.2		-57.66
												36.3		-58.0308
												36.4		-55.9287
												36.5		-57.1174
												36.6		-54.5496
												36.7		-58.3193
												36.8		-55.3411
												36.9		-55.6354
												37		-54.2952
												37.1		-58.2565
												37.2		-55.2889
												37.3		-57.99
												37.4		-56.3421
												37.5		-56.7208
												37.6		-53.6945
												37.7		-58.0087
												37.8		-56.158
												37.9		-53.567
												38		-54.1343
												38.1		-61.5251
												38.2		-57.8381
												38.3		-59.0374
												38.4		-56.3548
												38.5		-59.4232
												38.6		-52.8103
												38.7		-57.4591
												38.8		-60.4206
												38.9		-60.2895
												39		-57.7057
												39.1		-55.8048
												39.2		-59.0255
												39.3		-52.8283
												39.4		-61.0956
												39.5		-60.9678
												39.6		-58.6575
												39.7		-59.7439
												39.8		-55.7597
												39.9		-54.9177
												40		-60.0243
												40.1		-61.8118
												40.2		-54.4161
												40.3		-57.0406
												40.4		-59.9605
												40.5		-59.0887
												40.6		-59.216
												40.7		-47.5393
												40.8		-50.6221
												40.9		-43.7067
												41		-26.1847
												41.1		-34.8212
												41.2		-18.9787
												41.3		-13.645
												41.4		-19.9498
												41.5		-11.4382
												41.6		-63.6828
												41.7		-60.958
												41.8		-55.6013
												41.9		-74.3304
												42		-58.747
												42.1		-76.9239
												42.2		-139.968
												42.3		-168.705
												42.4		-88.123
												42.5		-59.8515
												42.6		-58.2385
												42.7		-56.4038
												42.8		-59.1864
												42.9		-55.7317
												43		-58.142
												43.1		-52.465
												43.2		-61.5297
												43.3		-56.3605
												43.4		-61.7718
												43.5		-63.1011
												43.6		-60.6965
												43.7		-59.5495
												43.8		-58.2748
												43.9		-56.4489
												44		-57.9801
												44.1		-60.9597
												44.2		-57.9007
												44.3		-59.5659
												44.4		-57.7725
												44.5		-45.9313
												44.6		-37.6957
												44.7		-9.5505
												44.8		25.5617
												44.9		28.8231
												45		-29.2258
												45.1		-3.98216
												45.2		-39.508
												45.3		-49.6894
												45.4		-55.4574
												45.5		1461.78
												45.6		227.622
												45.7		-49.8231
												45.8		-1266.16
												45.9		-86.2999
												46		-0.02668
												46.1		980.1
												46.2		850.559
												46.3		5.6974
												46.4		-1204.14
												46.5		-236.39
												46.6		-38.2468
												46.7		1351.09
												46.8		909.151
												46.9		-41.6035
												47		-1364.66
												47.1		-132.767
												47.2		61.3399
												47.3		1317.19
												47.4		-36.1183
												47.5		-217.807
												47.6		-1709.51
												47.7		-53.6751
												47.8		-54.3838
												47.9		-67.3738
												48		-172.545
												48.1		-136.998
												48.2		-66.9275
												48.3		-49.8029
												48.4		-47.384
												48.5		-44.7651
												48.6		-45.7033
												48.7		-44.4335
												48.8		-46.7846
												48.9		-47.1283
												49		-47.1665
												49.1		-46.848
												49.2		-45.5733
												49.3		-48.7597
												49.4		-43.5222
												49.5		-44.0394
												49.6		-46.3587
												49.7		-51.754
												49.8		-48.4987
												49.9		-45.4193
												50		-49.7212
												50.1		-51.6166
												50.2		-50.3089
												50.3		-46.3096
												50.4		-49.7595
												50.5		-48.141
												50.6		-49.2403
												50.7		-50.8498
												50.8		-48.8473
												50.9		-49.177
												51		-49.0003
												51.1		-49.3144
												51.2		-53.1248
												51.3		-48.7494
												51.4		-47.7304
												51.5		-48.631
												51.6		-46.9842
												51.7		-49.5835
												51.8		-49.8807
												51.9		-50.8778
												52		-52.0286
												52.1		-49.5348
												52.2		-48.4592
												52.3		-47.3127
												52.4		-47.2987
												52.5		-45.5708
												52.6		-49.082
												52.7		-50.134
												52.8		-47.1346
												52.9		-48.2748
												53		-50.5535
												53.1		-49.9467
												53.2		-51.1193
												53.3		-51.0878
												53.4		-48.431
												53.5		-49.6026
												53.6		-50.5444
												53.7		-55.302
												53.8		-50.0798
												53.9		-49.6605
												54		-48.3089
												54.1		-53.2281
												54.2		-47.7571
												54.3		-48.8836
												54.4		-49.3109
												54.5		-48.3605
												54.6		-50.6821
												54.7		-50.7734
												54.8		-50.0001
												54.9		-50.7081
												55		-50.0359
												55.1		-46.8938
												55.2		-49.8263
												55.3		-49.0955
												55.4		-51.398
												55.5		-50.5174
												55.6		-50.1
												55.7		-49.9288
												55.8		-50.3806
												55.9		-51.5224
												56		-46.4849
												56.1		-49.1028
												56.2		-48.205
												56.3		-49.2122
												56.4		-52.4004
												56.5		-49.3848
												56.6		-52.5604
												56.7		-51.1867
												56.8		-47.8424
												56.9		-46.4668
												57		-51.464
												57.1		-51.7411
												57.2		-48.784
												57.3		-49.7882
												57.4		-48.4903
												57.5		-53.0942
												57.6		-50.8453
												57.7		-51.9011
												57.8		-46.7407
												57.9		-49.9768
												58		-50.2557
												58.1		-52.2487
												58.2		-51.7087
												58.3		-48.4631
												58.4		-50.2669
												58.5		-50.1279
												58.6		-50.338
												58.7		-50.7957
												58.8		-46.4135
												58.9		-52.5165
												59		-49.9603
												59.1		-48.3229
												59.2		-47.4116
												59.3		-50.1201
												59.4		-48.6692
												59.5		-50.0242
												59.6		-53.1478
												59.7		-50.0338
												59.8		-46.9167
												59.9		-49.6781
												60		-48.117
												60.1		-49.2934
												60.2		-51.429
												60.3		-48.1188
												60.4		-51.4952
												60.5		-48.4625
												60.6		-50.532
												60.7		-51.3276
												60.8		-51.9542
												60.9		-49.2634
												61		-51.8696
												61.1		-48.2282
												61.2		-51.3203
												61.3		-54.1492
												61.4		-48.0715
												61.5		-48.1659
												61.6		-51.1064
												61.7		-51.3474
												61.8		-50.4949
												61.9		-47.1555
												62		-43.4039
												62.1		-50.1812
												62.2		-61.2573
												62.3		-56.1615
												62.4		-49.1911
												62.5		-45.5189
												62.6		-48.4339
												62.7		-50.2143
												62.8		-52.7613
												62.9		-48.6293
												63		-49.3217
												63.1		-51.3765
												63.2		-50.6757
												63.3		-49.6808
												63.4		-42.7551
												63.5		-42.8247
												63.6		-38.8487
												63.7		-42.7883
												63.8		-16.6197
												63.9		-16.6391
												64		-12.839
												64.1		-34.7431
												64.2		-21.6606
												64.3		-24.6663
												64.4		31.1139
												64.5		-41.4314
												64.6		-45.072
												64.7		-138.833
												64.8		-38.8123
												64.9		-50.7781
												65		-50.3188
												65.1		-61.3058
												65.2		-94.2066
												65.3		-116.262
												65.4		-79.8349
												65.5		-56.8515
												65.6		-53.7057
												65.7		-53.7583
												65.8		-50.8927
												65.9		-50.7264
												66		-50.281
												66.1		-51.2603
												66.2		-53.5932
												66.3		-48.3374
												66.4		-50.9301
												66.5		-50.9402
												66.6		-51.6944
												66.7		-53.1865
												66.8		-52.0842
												66.9		-50.9652
												67		-53.7426
												67.1		-33.3344
												67.2		-53.2187
												67.3		-47.8067
												67.4		-50.5397
												67.5		-50.0775
												67.6		-51.8516
												67.7		-52.0126
												67.8		-54.7466
												67.9		-52.4295
												68		-47.2293
												68.1		-45.2833
												68.2		-44.858
												68.3		-50.5699
												68.4		-20.3972
												68.5		12.1132
												68.6		-14.0065
												68.7		21.1923
												68.8		-31.7602
												68.9		-23.178
												69		-24.9139
												69.1		-51.9408
												69.2		54.4382
												69.3		675.206
												69.4		876.014
												69.5		-45.7466
												69.6		-988.857
												69.7		-1230.76
												69.8		2.22992
												69.9		140.429
												70		1112.5
												70.1		38.2367
												70.2		-11.6826
												70.3		-1340.1
												70.4		-18.6115
												70.5		71.9979
												70.6		1071.75
												70.7		67.888
												70.8		-6.14668
												70.9		-1283.36
												71		-63.056
												71.1		124.358
												71.2		1105.71
												71.3		-13.4405
												71.4		-13.5223
												71.5		-1272.16
												71.6		-77.4349
												71.7		-20.8535
												71.8		-18.9766
												71.9		-50.4036
												72		-145.109
												72.1		-98.0593
												72.2		-28.7988
												72.3		-22.6515
												72.4		-17.655
												72.5		-17.8832
												72.6		-19.9958
												72.7		-21.5085
												72.8		-18.5605
												72.9		-19.9044
												73		-21.9857
												73.1		-20.1805
												73.2		-21.7636
												73.3		-22.6577
												73.4		-21.9077
												73.5		-20.7941
												73.6		-15.8842
												73.7		-23.1554
												73.8		-24.5802
												73.9		-24.3437
												74		-22.9379
												74.1		-21.8649
												74.2		-22.4073
												74.3		-22.2216
												74.4		-22.6629
												74.5		-22.6197
												74.6		-22.2232
												74.7		-24.7037
												74.8		-23.8816
												74.9		-21.9917
												75		-24.4093
												75.1		-25.3541
												75.2		-22.8024
												75.3		-22.9541
												75.4		-21.7535
												75.5		-22.9622
												75.6		-22.9513
												75.7		-23.0532
												75.8		-24.4806
												75.9		-25.2834
												76		-25.295
												76.1		-24.2865
												76.2		-23.426
												76.3		-24.154
												76.4		-27.8933
												76.5		-24.111
												76.6		-26.1326
												76.7		-24.8837
												76.8		-26.8806
												76.9		-26.5276
												77		-25.8696
												77.1		-25.3775
												77.2		-26.2596
												77.3		-25.4326
												77.4		-23.2338
												77.5		-28.0272
												77.6		-26.8155
												77.7		-26.5258
												77.8		-24.449
												77.9		-23.2349
												78		-26.5246
												78.1		-27.404
												78.2		-24.9806
												78.3		-28.3293
												78.4		-27.3964
												78.5		-27.5078
												78.6		-26.3271
												78.7		-27.6302
												78.8		-28.1649
												78.9		-28.2741
												79		-25.8412
												79.1		-27.1929
												79.2		-26.6337
												79.3		-26.5544
												79.4		-26.1189
												79.5		-27.0244
												79.6		-27.2928
												79.7		-26.9542
												79.8		-25.1696
												79.9		-26.1379
												80		-27.6374
												80.1		-26.5099
												80.2		-29.1025
												80.3		-28.1165
												80.4		-29.7991
												80.5		-27.0336
												80.6		-26.1311
												80.7		-29.7071
												80.8		-28.1338
												80.9		-29.2102
												81		-27.1696
												81.1		-28.4803
												81.2		-26.6247
												81.3		-26.2155
												81.4		-21.9084
												81.5		-23.0489
												81.6		-23.2905
												81.7		-31.6236
												81.8		-31.0194
												81.9		-30.7842
												82		-33.5223
												82.1		-29.6281
												82.2		-28.2646
												82.3		-28.1397
												82.4		-29.6081
												82.5		-31.1549
												82.6		-30.2579
												82.7		-27.9866
												82.8		-29.7771
												82.9		-28.4986
												83		-31.1136
												83.1		-33.3385
												83.2		-30.25
												83.3		-30.2331
												83.4		-30.158
												83.5		-29.2993
												83.6		-30.0011
												83.7		-31.5093
												83.8		-29.574
												83.9		-28.3627
												84		-31.9678
												84.1		-30.5602
												84.2		-30.402
												84.3		-28.9984
												84.4		-30.6495
												84.5		-29.3924
												84.6		-29.4236
												84.7		-29.773
												84.8		-29.9974
												84.9		-29.9269
												85		-29.4751
												85.1		-29.6601
												85.2		-31.9257
												85.3		-33.7777
												85.4		-30.2
												85.5		-30.0577
												85.6		-28.9394
												85.7		-27.6338
												85.8		-30.476
												85.9		-30.0649
												86		-29.7996
												86.1		-28.9253
												86.2		-30.3334
												86.3		-28.2768
												86.4		-28.3892
												86.5		-32.3779
												86.6		-29.7924
												86.7		-31.6826
												86.8		-31.6047
												86.9		-29.288
												87		-27.8679
												87.1		-29.2505
												87.2		-29.8683
												87.3		-30.894
												87.4		-32.2242
												87.5		-27.8579
												87.6		-28.8427
												87.7		-31.2065
												87.8		-32.4989
												87.9		-29.1849
												88		-31.1219
												88.1		-30.4693
												88.2		-28.8991
												88.3		-28.2119
												88.4		-29.1781
												88.5		-32.3512
												88.6		-31.6892
												88.7		-32.9103
												88.8		-32.1065
												88.9		-33.5772
												89		-28.8195
												89.1		-30.0303
												89.2		-31.7857
												89.3		-31.9479
												89.4		-31.1595
												89.5		-30.2977
												89.6		-21.4322
												89.7		-29.9737
												89.8		-35.0792
												89.9		-30.947
												90		-31.385
												90.1		-33.6818
												90.2		-31.6964
												90.3		-32.7288
												90.4		-31.6014
												90.5		-33.3065
												90.6		-32.2601
												90.7		-31.2019
												90.8		-30.1496
												90.9		-29.1398
												91		-31.9748
												91.1		-34.3966
												91.2		-30.9613
												91.3		-30.4469
												91.4		-31.5126
												91.5		-32.0908
												91.6		-32.0736
												91.7		-33.0545
												91.8		-31.4215
												91.9		-33.5685
												92		-34.9807
												92.1		-18.5263
												92.2		-27.496
												92.3		-18.5487
												92.4		-23.1026
												92.5		-19.7368
												92.6		-15.9492
												92.7		-35.9899
												92.8		-32.0322
												92.9		-63.7098
												93		-81.6341
												93.1		-23.6379
												93.2		-32.2103
												93.3		-25.4486
												93.4		-22.8003
												93.5		-23.7774
												93.6		-31.5873
												93.7		-29.5876
												93.8		-31.5095
												93.9		-31.2189
												94		-31.1851
												94.1		-32.3242
												94.2		-31.38
												94.3		-31.1077
												94.4		-33.0503
												94.5		-32.3267
												94.6		-30.4872
												94.7		-28.603
												94.8		-18.9148
												94.9		-12.468
												95		-8.89948
												95.1		-6.35927
												95.2		-5.83415
												95.3		-4.70201
												95.4		-3.63142
												95.5		-2.31295
												95.6		-2.74065
												95.7		-1.03957
												95.8		-2.67419
												95.9		-1.442
												96		-3.14234
												96.1		-3.60593
												96.2		-2.90216
												96.3		0.087962
												96.4		4.41745
												96.5		6.84555
												96.6		24.6606
												96.7		41.4475
												96.8		40.8199
												96.9		70.5725
												97		39.9194
												97.1		44.5485
												97.2		38.5428
												97.3		-0.44844
												97.4		-0.00554
												97.5		915.24
												97.6		1024.98
												97.7		-7.00056
												97.8		-27.5979
												97.9		-1156.97
												98		-71.7928
												98.1		8.28387
												98.2		1074.49
												98.3		1033.48
												98.4		-4.88616
												98.5		-342.423
												98.6		-1139.22
												98.7		-82.4083
												98.8		-0.07097
												98.9		312.595
												99		1147.25
												99.1		-4.6089
												99.2		-1243.23
												99.3		-91.7733
												99.4		-3.00116
												99.5		1727.39
												99.6		285.084
												99.7		-0.05238
												99.8		-1142.22
												99.9		-453.005
												100		-2.80163
												100.1		-1.56968
												100.2		-94.3685
												100.3		-107.313
												100.4		-55.6015
												100.5		-16.4349
												100.6		-9.07796
												100.7		-4.92979
												100.8		-4.57259
												100.9		-2.38046
												101		-0.55347
												101.1		-4.68517
												101.2		-4.13356
												101.3		-1.76318
												101.4		-1.77379
												101.5		-2.14227
												101.6		-1.55627
												101.7		-3.45882
												101.8		-3.83163
												101.9		-4.83539
												102		-3.474
												102.1		-3.09704
												102.2		-3.49924
												102.3		-2.98471
												102.4		-2.82832
												102.5		-2.78183
												102.6		-2.57151
												102.7		-3.55131
												102.8		-3.76389
												102.9		-3.06563
												103		-2.9422
												103.1		-2.96674
												103.2		-3.12612
												103.3		-2.93062
												103.4		-3.00748
												103.5		-3.15069
												103.6		-3.63727
												103.7		-3.561
												103.8		-3.61887
												103.9		-3.09274
												104		-3.54115
												104.1		-3.69438
												104.2		-3.32789
												104.3		-3.62273
												104.4		-2.51944
												104.5		-3.79412
												104.6		-3.801
												104.7		-3.71519
												104.8		-5.24552
												104.9		-2.3185
												105		-3.76236
												105.1		-4.46134
												105.2		-4.18953
												105.3		-2.51946
												105.4		-4.0758
												105.5		-4.4515
												105.6		-4.45916
												105.7		-4.18755
												105.8		-4.38469
												105.9		-4.12911
												106		-4.72558
												106.1		-4.37868
												106.2		-4.08841
												106.3		-3.57264
												106.4		-4.45186
												106.5		-3.58613
												106.6		-4.45188
												106.7		-3.9096
												106.8		-3.8332
												106.9		-4.45116
												107		-4.94432
												107.1		-4.51754
												107.2		-4.70794
												107.3		-4.75215
												107.4		-5.11782
												107.5		-4.49458
												107.6		-4.84089
												107.7		-4.70652
												107.8		-4.75622
												107.9		-4.53324
												108		-4.87586
												108.1		-4.63473
												108.2		-5.26732
												108.3		-5.42246
												108.4		-5.00354
												108.5		-4.72789
												108.6		-4.65603
												108.7		-5.37686
												108.8		-4.96476
												108.9		-5.09473
												109		-4.98401
												109.1		-5.06878
												109.2		-5.00155
												109.3		-4.57268
												109.4		-4.98497
												109.5		-4.58161
												109.6		-5.15391
												109.7		-5.56798
												109.8		-4.75853
												109.9		-4.85546
												110		-4.9687
												110.1		-4.86423
												110.2		-5.18213
												110.3		-4.26846
												110.4		-5.03353
												110.5		-5.72202
												110.6		-5.10767
												110.7		-5.69002
												110.8		-5.61198
												110.9		-5.13596
												111		-5.65573
												111.1		-5.44529
												111.2		-5.43355
												111.3		-5.80346
												111.4		-5.14622
												111.5		-5.24654
												111.6		-5.01626
												111.7		-4.98926
												111.8		-5.95303
												111.9		-5.22707
												112		-4.54171
												112.1		-4.63566
												112.2		-5.50415
												112.3		-5.56674
												112.4		-5.19975
												112.5		-2.65077
												112.6		-4.92094
												112.7		-5.65841
												112.8		-5.07509
												112.9		-5.27774
												113		-4.85725
												113.1		-5.03354
												113.2		-4.9116
												113.3		-5.64349
												113.4		-5.21047
												113.5		-5.73451
												113.6		-5.38423
												113.7		-5.5084
												113.8		-5.41563
												113.9		-5.8913
												114		-5.95146
												114.1		-5.71842
												114.2		-5.3281
												114.3		-5.79932
												114.4		-5.68518
												114.5		-5.60834
												114.6		-6.17667
												114.7		-5.9333
												114.8		-5.71178
												114.9		-6.15474
												115		-5.99794
												115.1		-5.99993
												115.2		-6.17055
												115.3		-5.99653
												115.4		-5.75587
												115.5		-5.55815
												115.6		-5.84024
												115.7		-5.76829
												115.8		-6.11348
												115.9		-5.70692
												116		-6.40331
												116.1		-5.90774
												116.2		-5.84408
												116.3		-5.84408
												116.4		-5.66048
												116.5		-6.52589
												116.6		-5.94731
												116.7		-5.77643
												116.8		-6.16351
												116.9		-5.46711
												117		-6.05749
												117.1		-6.08681
												117.2		-6.04072
												117.3		-5.83227
												117.4		-5.79042
												117.5		-6.00339
												117.6		-5.92148
												117.7		-6.02152
												117.8		-5.78313
												117.9		-6.00855
												118		-6.1075
												118.1		-5.67713
												118.2		-5.79426
												118.3		-5.48954
												118.4		-5.7562
												118.5		-6.05662
												118.6		-5.54141
												118.7		-5.72441
												118.8		-5.55368
												118.9		-6.17662
												119		-5.58935
