# Supplementary material for: The fluoride permeation pathway and anion recognition in Fluc family fluoride channels
Source: eLife. 2021 Jul 12;10:e69482. doi: 10.7554/eLife.69482 (PMC8315801; doi:10.7554/eLife.69482)
Supplement: Figure 4—source data 3. [file elife-69482-fig4-data3.xlsx]

## Sheet: Sheet1
		percentage of currents blocked, 300NaF							percentage of currents blocked, 100NaF						percentage of currents blocked, 30 NaF
OCN, mM	Bilayer 1	Bilayer 2	Bilayer 3	Bilayer 4		OCN, mM	Bilayer 1	Bilayer 2	Bilayer 3	Bilayer 4	Bilayer 5	Bilayer 6		OCN, mM	Bilayer 1	Bilayer 2	Bilayer 3	Bilayer 4
0	0	0	0	0		0	0	0	0	0	0	0		0	0	0
1	4	4	6	4		1	5	15	20	8	12	12		1	18	18	18
3	18	19	20	19		3	19	24	35	21	35	22		3	43	42	34	38
10	62	40	49	55		10	76	71	75	70	78	85
