# Supplementary material for: The fluoride permeation pathway and anion recognition in Fluc family fluoride channels
Source: eLife. 2021 Jul 12;10:e69482. doi: 10.7554/eLife.69482 (PMC8315801; doi:10.7554/eLife.69482)
Supplement: Figure 4—source data 4. [file elife-69482-fig4-data4.xlsx]

## Sheet: Sheet1
Fluc-Bpe 'triad' mutants		Y104F	0	0.00376461	0.0105993	0.00013184	0.00013916		E88Q	0	0.00986491	0.00608896	2.8076e-05	6.1035e-05		E88A	0	-1.41531e-06	-0.000150709		E88D	0	0.00054	0.000605		T39S	0	0.0111675	0.0357154	2.06801e-05		T39A	0	0.0085059	0.00202196			WT	0	0.0011742	0.000114907	0.00458015			Fluc-Ec2-WT	0	0.00428298	0.00769152
Cl- dump			0.1	0.00376461	0.0105993	0.00013306	0.00014038			0.1	0.012534	0.0040094	2.8076e-05	6.1035e-05			0.1	-0.00177055	-0.188537			0.1	0.000542	0.000605			0.1	0.00819742	0.050482	0.00181583			0.1	0.00571891	-0.000129061				0.1	0.0024731	0.00563928	0.00170317			Cl- dump	0.1	0.0055984	0.00769152
			0.2	0.00376461	0.0157347	0.00013428	0.00014038			0.2	0.00986491	0.00192983	2.8076e-05	5.9814e-05			0.2	-0.00530882	-0.565309			0.2	0.000542	0.000605			0.2	0.0111675	0.0554042	-0.00177447			0.2	0.00711241	-0.00228008				0.2	0.0011742	0.000114907	0.00314166				0.2	0.00691381	0.0109506
			0.3	-0.00133557	0.0157347	0.00013306	0.00013916			0.3	0.00452676	0.00608896	2.6855e-05	5.9814e-05			0.3	-0.00353969	-0.376923			0.3	0.000542	0.000607			0.3	0.0141376	0.025871	2.06801e-05			0.3	0.0098994	-0.00120457				0.3	0.003772	0.00195637	-0.00405079				0.3	0.00954464	0.00932108
			0.4	0.00376461	0.0157347	0.00013306	0.00014038			0.4	0.00719584	0.00816852	2.6855e-05	6.1035e-05			0.4	-0.00619339	-0.659502			0.4	0.000541	0.000605			0.4	0.0111675	0.0307932	0.00181583			0.4	0.0140799	-0.00120457				0.4	0.003772	0.00379782	-0.00117381				0.4	0.01086	0.00932108
			0.5	0.00546468	0.0140229	0.00013428	0.00014038			0.5	0.012534	0.00608896	2.6855e-05	5.9814e-05			0.5	-0.00442425	-0.471116			0.5	0.000542	0.000607			0.5	0.0141376	0.0357154	0.00361098			0.5	0.0168669	0.00202196				0.5	0.0011742	0.00379782	0.00745714				0.5	0.01086	0.0125802
			0.6	0.00716474	0.0157347	0.00013428	0.00013916			0.6	0.0165376	0.0123276	2.6855e-05	5.9814e-05			0.6	-0.00442425	-0.471116			0.6	0.000542	0.000605			0.6	0.0200777	0.0455598	2.06801e-05			0.6	0.0140799	0.00524849				0.6	0.0024731	0.000114907	0.0175266				0.6	0.01086	0.00769152
			0.7	0.00546468	0.02087	0.00013428	0.00014038			0.7	0.012534	0.00816852	2.5635e-05	6.2256e-05			0.7	-0.00530882	-0.565309			0.7	0.000542	0.000605			0.7	0.0141376	0.0701707	0.00181583			0.7	0.0154734	0.00309747				0.7	0.00507089	0.00195637	0.00314166				0.7	0.00822922	0.0109506
			0.8	0.00546468	0.02087	0.00013428	0.00014038			0.8	0.0111995	0.00608896	2.8076e-05	6.1035e-05			0.8	-0.00707796	-0.753696			0.8	0.000542	0.000607			0.8	0.00522734	0.0800151	-0.00356962			0.8	0.0140799	0.00524849				0.8	0.0024731	0.00748074	-0.0026123				0.8	0.0121755	0.0125802
			0.9	0.00376461	0.0191582	0.0001355	0.00014038			0.9	0.00853038	0.00192983	2.8076e-05	6.1035e-05			0.9	-0.00442425	-0.471116			0.9	0.000541	0.000607			0.9	0.00819742	0.0603264	-0.00177447			0.9	0.0126864	0.00417298				0.9	0.00636979	0.00748074	-0.00405079				0.9	0.01086	0.00932108
			1	0.00206455	0.0191582	0.0001355	0.0001416			1	0.0138685	0.0123276	2.6855e-05	6.1035e-05			1	-0.00177055	-0.188537			1	0.000542	0.000605			1	0.0141376	0.0406376	-0.00536477			1	0.0085059	0.00309747				1	0.00896758	0.00379782	-0.0026123				1	0.01086	0.00932108
			1.1	0.00376461	0.0157347	0.00013428	0.00014038			1.1	0.0152031	0.0123276	2.6855e-05	6.1035e-05			1.1	-0.00177055	-0.188537			1.1	0.000542	0.000608			1.1	0.00522734	0.0406376	2.06801e-05			1.1	0.0126864	0.000946448				1.1	0.00766869	0.00195637	0.00601864				1.1	0.01086	0.00932108
			1.2	0.00546468	0.0191582	0.00013428	0.00014038			1.2	0.00986491	0.00192983	2.6855e-05	6.1035e-05			1.2	-0.00265512	-0.28273			1.2	0.000542	0.000607			1.2	0.00225726	0.0455598	0.00361098			1.2	0.0154734	0.00202196				1.2	0.0115654	0.00195637	-0.00405079				1.2	0.00822922	0.00932108
			1.3	0.00716474	0.0174464	0.00013428	0.00013916			1.3	0.00986491	0.00192983	2.8076e-05	6.2256e-05			1.3	-0.00177055	-0.188537			1.3	0.000542	0.000605			1.3	0.00819742	0.0750929	-0.00177447			1.3	0.0126864	-0.000129061				1.3	0.0115654	0.00195637	-0.00117381				1.3	0.00822922	0.00769152
			1.4	0.00376461	0.0157347	0.0001355	0.0001416			1.4	0.0152031	0.00192983	2.6855e-05	6.1035e-05			1.4	-0.00177055	-0.188537			1.4	0.000542	0.000607			1.4	0.00225726	0.0750929	0.00181583			1.4	0.0098994	0.000946448				1.4	0.0102665	0.00379782	-0.00836626				1.4	0.01086	0.0125802
			1.5	0.00546468	0.0140229	0.0001355	0.00014038			1.5	0.00986491	-0.000149728	2.6855e-05	6.1035e-05			1.5	-0.00265512	-0.28273			1.5	0.000542	0.000605			1.5	-0.000712819	0.0554042	0.00361098			1.5	0.00293192	0.00202196				1.5	0.0102665	0.00195637	0.000264682				1.5	0.01086	0.0109506
			1.6	0.00716474	0.0157347	0.00013428	0.00014038			1.6	0.012534	-0.00222929	2.6855e-05	6.2256e-05			1.6	-0.00265512	-0.28273			1.6	0.000542	0.000607			1.6	0.00819742	0.050482	2.06801e-05			1.6	0.00293192	0.000946448				1.6	0.0102665	0.00379782	-0.00692777				1.6	0.00954464	0.0142098
			1.7	0.00716474	0.0123111	0.00013428	0.00014038			1.7	0.0138685	0.00192983	2.5635e-05	6.1035e-05			1.7	-1.41531e-06	-0.000150709			1.7	0.000542	0.000607			1.7	0.00522734	0.0357154	-0.00356962			1.7	0.00432541	0.0073995				1.7	0.00766869	0.000114907	-0.00692777				1.7	0.00954464	0.0109506
			1.8	0.00716474	0.0123111	0.00013306	0.00013916			1.8	0.012534	0.00608896	2.5635e-05	6.1035e-05			1.8	-0.00353969	-0.376923			1.8	0.000542	0.000607			1.8	-0.0036829	0.0554042	-0.00177447			1.8	0.00711241	0.00417298				1.8	0.00896758	0.00379782	-0.00405079				1.8	0.01086	0.0109506
			1.9	0.00716474	0.0140229	0.00013428	0.0001416			1.9	0.0152031	0.00816852	2.6855e-05	6.1035e-05			1.9	-0.0106162	-1.13047			1.9	0.000543	0.000605			1.9	-0.0125931	0.0701707	-0.00536477			1.9	0.0112929	0.000946448				1.9	0.00766869	0.000114907	-0.0026123				1.9	0.00691381	0.0142098
			2	0.00546468	0.0105993	0.00013428	0.00014038			2	0.012534	0.0102481	2.8076e-05	6.1035e-05			2	-0.00619339	-0.659502			2	0.000544	0.000608			2	-0.000712819	0.0603264	2.06801e-05			2	0.0140799	-0.00228008				2	0.00896758	0.00195637	-0.00405079				2	0.0121755	0.0109506
			2.1	0.00716474	0.0123111	0.00013306	0.00014038			2.1	0.00853038	0.00608896	2.6855e-05	6.1035e-05			2.1	-0.00353969	-0.376923			2.1	0.000543	0.000608			2.1	-0.00665298	0.0307932	2.06801e-05			2.1	0.0112929	-0.00120457				2.1	0.0128643	0.00195637	-0.00548928				2.1	0.00954464	0.00932108
			2.2	0.00546468	0.0123111	0.00013428	0.00014038			2.2	0.0152031	0.00816852	2.8076e-05	6.1035e-05			2.2	-0.00177055	-0.188537			2.2	0.000543	0.000607			2.2	-0.0125931	0.0406376	0.00181583			2.2	0.00153842	-0.00228008				2.2	0.0128643	0.00195637	-0.00548928				2.2	0.00954464	0.0125802
			2.3	0.00716474	0.0123111	0.0001355	0.00014038			2.3	0.0205412	0.00608896	2.8076e-05	6.1035e-05			2.3	-0.000885983	-0.0943438			2.3	0.000544	0.000607			2.3	-0.00962306	0.0455598	-0.00356962			2.3	0.00571891	-0.00228008				2.3	0.0128643	0.00195637	-0.00836626				2.3	0.00691381	0.00932108
			2.4	0.00716474	0.0140229	0.00013428	0.00014038			2.4	0.0111995	0.0040094	2.6855e-05	6.1035e-05			2.4	-0.00530882	-0.565309			2.4	0.000543	0.000607			2.4	0.00225726	0.0701707	0.00540614			2.4	0.00571891	-0.000129061				2.4	0.00896758	0.00195637	-0.00548928				2.4	0.00954464	0.0142098
			2.5	0.00716474	0.0140229	0.00013428	0.0001416			2.5	0.0058613	0.00608896	2.6855e-05	6.2256e-05			2.5	-0.00796252	-0.847889			2.5	0.000542	0.000605			2.5	-0.00665298	0.0701707	2.06801e-05			2.5	0.00432541	0.00309747				2.5	0.00766869	0.00379782	-0.00980475				2.5	0.0055984	0.0142098
			2.6	0.00716474	0.0157347	0.00013306	0.00014038			2.6	0.00853038	0.0102481	2.6855e-05	6.2256e-05			2.6	-0.00530882	-0.565309			2.6	0.000542	0.000607			2.6	-0.00665298	0.0455598	0.00181583			2.6	0.00711241	0.00524849				2.6	0.00896758	-0.00172655	-0.00980475				2.6	0.00691381	0.0109506
			2.7	0.00546468	0.02087	0.0001355	0.0001416			2.7	0.0111995	0.0040094	2.6855e-05	6.2256e-05			2.7	-0.00530882	-0.565309			2.7	0.000542	0.000607			2.7	-0.0036829	0.0455598	2.06801e-05			2.7	0.0168669	-0.00228008				2.7	0.00896758	0.00195637	-0.00836626				2.7	0.00822922	0.0142098
			2.8	0.00546468	0.0191582	0.00013672	0.00014038			2.8	0.0111995	0.00192983	2.6855e-05	6.1035e-05			2.8	-0.00265512	-0.28273			2.8	0.000542	0.000605			2.8	0.00522734	0.025871	2.06801e-05			2.8	0.0154734	-0.000129061				2.8	0.00766869	0.00195637	-0.00836626				2.8	0.00691381	0.0142098
			2.9	0.00716474	0.0140229	0.00013428	0.00014038			2.9	0.00986491	0.00816852	2.8076e-05	6.3477e-05			2.9	-0.00353969	-0.376923			2.9	0.000542	0.000608			2.9	-0.000712819	0.0554042	-0.00356962			2.9	0.0140799	-0.000129061				2.9	0.0102665	0.00195637	0.00889563				2.9	0.00954464	0.00932108
			3	0.00376461	0.0123111	0.00013428	0.00014038			3	0.012534	0.0144072	2.6855e-05	6.1035e-05			3	-0.00530882	-0.565309			3	0.000543	0.000607			3	-0.0036829	0.0947817	-0.00177447			3	0.0154734	0.000946448				3	0.00896758	0.00195637	-0.0112432				3	0.0055984	0.0125802
			3.1	0.00546468	0.0123111	0.0001355	0.00014038			3.1	0.0192067	0.0164868	2.6855e-05	6.2256e-05			3.1	-0.00530882	-0.565309			3.1	0.000543	0.000607			3.1	0.0111675	0.0603264	2.06801e-05			3.1	0.0168669	0.00309747				3.1	0.0141632	0.00195637	-0.00980475				3.1	0.00428298	0.0109506
			3.2	0.00716474	0.0105993	0.0001355	0.00014038			3.2	0.0192067	0.0144072	2.6855e-05	6.2256e-05			3.2	-0.00619339	-0.659502			3.2	0.000542	0.000607			3.2	0.00522734	0.050482	0.00181583			3.2	0.0126864	0.00309747				3.2	0.0128643	0.00195637	-0.00980475				3.2	0.00296757	0.00932108
			3.3	0.00376461	0.00717577	0.0001355	0.00014038			3.3	0.012534	0.0144072	2.8076e-05	6.1035e-05			3.3	-0.00619339	-0.659502			3.3	0.000542	0.000607			3.3	-0.000712819	0.0455598	0.00361098			3.3	0.0140799	-0.00120457				3.3	0.0128643	0.00195637	-0.00980475				3.3	0.00691381	0.0125802
			3.4	0.00546468	0.0123111	0.00013306	0.00014038			3.4	0.0058613	0.00816852	2.5635e-05	6.1035e-05			3.4	-0.00530882	-0.565309			3.4	0.000543	0.000607			3.4	0.00522734	0.0406376	0.00361098			3.4	0.0154734	-0.00120457				3.4	0.0141632	0.000114907	-0.00836626				3.4	0.00691381	0.0109506
			3.5	0.0088648	0.00888755	0.0001355	0.00014038			3.5	0.00853038	0.0123276	2.6855e-05	6.2256e-05			3.5	-0.00884709	-0.942082			3.5	0.000542	0.000608			3.5	0.00819742	0.0800151	0.00181583			3.5	0.0182604	-0.00120457				3.5	0.0141632	0.00563928	-0.00836626				3.5	0.00691381	0.00769152
			3.6	0.0088648	0.00717577	0.0001355	0.00014038			3.6	0.00853038	0.00816852	2.8076e-05	6.2256e-05			3.6	-0.00530882	-0.565309			3.6	0.000543	0.000605			3.6	0.00819742	0.0849373	0.00181583			3.6	0.0210474	-0.00335559				3.6	0.0154621	0.00195637	-0.00980475				3.6	0.00822922	0.0125802
			3.7	0.00716474	0.0105993	0.00013672	0.00013916			3.7	0.0111995	0.0102481	2.5635e-05	6.3477e-05			3.7	-0.00796252	-0.847889			3.7	0.000543	0.000607			3.7	0.00225726	0.050482	2.06801e-05			3.7	0.0168669	-0.000129061				3.7	0.0154621	0.00195637	-0.00548928				3.7	0.00691381	0.0109506
			3.8	0.0088648	0.0105993	0.00013672	0.00013916			3.8	0.00986491	0.00608896	2.6855e-05	6.2256e-05			3.8	-0.00619339	-0.659502			3.8	0.000544	0.000608			3.8	0.0141376	0.0357154	2.06801e-05			3.8	0.0168669	0.000946448				3.8	0.0154621	0.000114907	-0.00117381				3.8	0.00822922	0.00932108
			3.9	0.00546468	0.0123111	0.00013428	0.00014038			3.9	0.0111995	0.00608896	2.8076e-05	6.1035e-05			3.9	-1.41531e-06	-0.000150709			3.9	0.000542	0.000608			3.9	0.0111675	0.0406376	-0.00177447			3.9	0.0182604	-0.000129061				3.9	0.016761	0.000114907	-0.00405079				3.9	0.00822922	0.0125802
			4	0.00546468	0.0157347	0.00013428	0.00014038			4	0.00986491	0.0123276	2.8076e-05	6.1035e-05			4	-0.00177055	-0.188537			4	0.000544	0.000609			4	0.00522734	0.050482	2.06801e-05			4	0.0182604	0.00309747				4	0.0180599	0.00195637	-0.00405079				4	0.00954464	0.00932108
			4.1	0.00716474	0.0191582	0.00013428	0.0001416			4.1	0.0165376	0.0123276	2.8076e-05	6.2256e-05			4.1	-0.00530882	-0.565309			4.1	0.000542	0.000608			4.1	0.00522734	0.0603264	2.06801e-05			4.1	0.0154734	0.00309747				4.1	0.0180599	0.00195637	-0.00692777				4.1	0.00822922	0.00606196
			4.2	0.0088648	0.0123111	0.00013428	0.0001416			4.2	0.0111995	0.0123276	2.6855e-05	6.2256e-05			4.2	-0.00796252	-0.847889			4.2	0.000543	0.000609			4.2	0.0111675	0.0307932	0.00361098			4.2	0.0182604	0.000946448				4.2	0.0193588	0.00195637	-0.00980475				4.2	0.00691381	0.0125802
			4.3	0.00716474	0.0174464	0.00013428	0.00013916			4.3	0.012534	0.0102481	2.6855e-05	6.1035e-05			4.3	-0.0106162	-1.13047			4.3	0.000542	0.000608			4.3	-0.0036829	0.0307932	0.00540614			4.3	0.0154734	-0.00120457				4.3	0.0206577	0.000114907	-0.00980475				4.3	0.00954464	0.00932108
			4.4	0.00546468	0.0157347	0.0001355	0.00014038			4.4	0.0138685	0.0164868	2.8076e-05	6.2256e-05			4.4	-0.0132699	-1.41305			4.4	0.000542	0.000609			4.4	-0.000712819	0.025871	0.00540614			4.4	0.0126864	0.000946448				4.4	0.0219565	0.000114907	-0.00980475				4.4	0.00428298	0.00606196
			4.5	0.00376461	0.0123111	0.0001355	0.00014038			4.5	0.0165376	0.0144072	2.8076e-05	6.1035e-05			4.5	-0.00530882	-0.565309			4.5	0.000542	0.000609			4.5	0.00522734	0.0307932	0.00540614			4.5	0.0126864	0.00309747				4.5	0.0232554	-0.00172655	-0.00836626				4.5	0.00822922	0.0109506
			4.6	0.00206455	0.0123111	0.00013672	0.00014038			4.6	0.0111995	0.0123276	2.6855e-05	6.2256e-05			4.6	-0.00707796	-0.753696			4.6	0.000543	0.000609			4.6	0.00522734	0.0701707	0.00181583			4.6	0.0126864	-0.00120457				4.6	0.0232554	0.00195637	-0.0126817				4.6	0.0055984	0.00606196
			4.7	0.00206455	0.0105993	0.00013428	0.00014038			4.7	0.0111995	0.0164868	2.6855e-05	6.1035e-05			4.7	-0.0123854	-1.31885			4.7	0.000543	0.00061			4.7	0.00819742	0.050482	0.00540614			4.7	0.0112929	-0.00120457				4.7	0.0245543	-0.00540947	-0.00980475				4.7	0.00691381	0.00769152
			4.8	0.000364493	0.0105993	0.0001355	0.00014038			4.8	0.012534	0.0144072	2.6855e-05	6.1035e-05			4.8	-0.00973166	-1.03627			4.8	0.000542	0.00061			4.8	0.0141376	0.0455598	-0.00177447			4.8	0.0140799	0.00202196				4.8	0.0245543	-0.00172655	-0.0155587				4.8	0.00691381	0.00932108
			4.9	0.00206455	0.0140229	0.0001355	0.00014038			4.9	0.0111995	0.0123276	2.6855e-05	6.2256e-05			4.9	-0.00707796	-0.753696			4.9	0.000542	0.000609			4.9	0.0200777	0.0455598	0.00181583			4.9	0.0196539	0.0073995				4.9	0.0258532	-0.00540947	-0.0141202				4.9	0.00691381	0.00769152
			5	0.00376461	0.0140229	0.0001355	0.0001416			5	0.0111995	0.0102481	2.8076e-05	6.2256e-05			5	-0.0106162	-1.13047			5	0.000543	0.000609			5	0.0111675	0.025871	2.06801e-05			5	0.0168669	0.00524849				5	0.028451	-0.00356801	-0.0169972				5	0.00691381	0.00769152
			5.1	0.00376461	0.0123111	0.0001355	0.0001416			5.1	0.0111995	0.0123276	2.6855e-05	5.9814e-05			5.1	-0.00973166	-1.03627			5.1	0.000543	0.000609			5.1	0.0111675	0.0603264	2.06801e-05			5.1	0.0168669	0.00417298				5.1	0.0271521	-0.00356801	-0.00980475				5.1	0.0055984	0.0109506
			5.2	0.00206455	0.0157347	0.00013428	0.00014038			5.2	0.00853038	0.00816852	2.6855e-05	6.2256e-05			5.2	-0.00530882	-0.565309			5.2	0.000543	0.00061			5.2	0.0111675	0.0455598	0.00181583			5.2	0.0210474	0.000946448				5.2	0.0258532	-0.00172655	-0.0141202				5.2	0.00954464	0.00606196
			5.3	0.00206455	0.0123111	0.0001355	0.0001416			5.3	0.0111995	0.00816852	2.8076e-05	6.1035e-05			5.3	-0.00884709	-0.942082			5.3	0.000542	0.000609			5.3	0.0200777	0.0307932	0.00540614			5.3	0.0210474	0.000946448				5.3	0.0245543	-0.00540947	-0.00980475				5.3	0.00691381	0.00769152
			5.4	0.00206455	0.0191582	0.0001355	0.0001416			5.4	0.0138685	0.0102481	2.8076e-05	6.2256e-05			5.4	-0.0132699	-1.41305			5.4	0.000542	0.000609			5.4	0.0141376	0.0160267	0.0107916			5.4	0.0196539	-0.00120457				5.4	0.0258532	-0.00172655	-0.0126817				5.4	0.00691381	0.0125802
			5.5	0.00546468	0.0157347	0.0001355	0.00014282			5.5	0.0138685	0.0102481	2.8076e-05	6.2256e-05			5.5	-0.00973166	-1.03627			5.5	0.000543	0.00061			5.5	0.00819742	0.0209488	0.00720129			5.5	0.0210474	-0.000129061				5.5	0.0232554	-0.00725093	-0.0126817				5.5	0.00691381	0.00769152
			5.6	0.000364493	0.02087	0.0001355	0.00014648			5.6	0.00986491	0.0102481	2.8076e-05	6.2256e-05			5.6	-0.0123854	-1.31885			5.6	0.000542	0.000608			5.6	0.0111675	0.025871	2.06801e-05			5.6	0.0210474	-0.000129061				5.6	0.0232554	-0.00356801	-0.00836626				5.6	0.00428298	0.0109506
			5.7	0.000364493	0.0140229	0.00013428	0.00014404			5.7	0.00986491	0.0144072	2.8076e-05	6.2256e-05			5.7	-0.0159236	-1.69563			5.7	0.000542	0.000609			5.7	0.0141376	0.0652486	0.00181583			5.7	0.0168669	0.00417298				5.7	0.0258532	-0.00172655	-0.0126817				5.7	0.0121755	0.0125802
			5.8	0.000364493	0.0157347	0.0001355	0.00014404			5.8	0.0138685	0.0123276	3.0518e-05	6.3477e-05			5.8	-0.0132699	-1.41305			5.8	0.000542	0.000609			5.8	-0.000712819	0.0603264	-0.00356962			5.8	0.0168669	0.00309747				5.8	0.0258532	-0.00540947	-0.00836626				5.8	0.00954464	0.00769152
			5.9	-0.00133557	0.0157347	0.0001355	0.00014282			5.9	0.0152031	0.0123276	2.9297e-05	6.3477e-05			5.9	-0.00884709	-0.942082			5.9	0.000543	0.000609			5.9	-0.0036829	0.0307932	0.0107916			5.9	0.0140799	-0.000129061				5.9	0.0245543	-0.00725093	-0.0126817				5.9	0.01086	0.00932108
			6	0.000364493	0.0123111	0.00013428	0.00014282			6	0.0138685	0.0144072	2.8076e-05	6.3477e-05			6	-0.0106162	-1.13047			6	0.000543	0.000609			6	0.00522734	0.0307932	0.016177			6	0.0126864	-0.00228008				6	0.0245543	-0.00172655	-0.00980475				6	0.00691381	0.0109506
			6.1	0.00376461	0.0140229	0.00013306	0.0001416			6.1	0.012534	0.00816852	2.8076e-05	6.2256e-05			6.1	-0.00530882	-0.565309			6.1	0.000543	0.00061			6.1	0.0111675	0.0357154	0.0484898			6.1	0.0196539	-0.00228008				6.1	0.0232554	-0.00540947	-0.0126817				6.1	0.00954464	0.0109506
			6.2	0.00376461	0.0123111	0.00013428	0.00014282			6.2	0.0111995	0.00816852	2.8076e-05	6.2256e-05			6.2	-0.00707796	-0.753696			6.2	0.000542	0.000609			6.2	0.0111675	0.0406376	0.0287431			6.2	0.0224409	-0.000129061				6.2	0.0258532	-0.00540947	-0.00836626				6.2	0.0055984	0.0125802
			6.3	0.00206455	0.0123111	0.00013428	0.0001416			6.3	0.012534	0.00192983	2.8076e-05	6.2256e-05			6.3	-0.00973166	-1.03627			6.3	0.000543	0.00061			6.3	0.0378982	0.0701707	0.0287431			6.3	0.0182604	0.00202196				6.3	0.0271521	-0.00540947	-0.0112432				6.3	0.00691381	0.0125802
			6.4	0.00206455	0.0123111	0.00013428	0.00014282			6.4	0.012534	0.00192983	2.8076e-05	6.2256e-05			6.4	-0.0106162	-1.13047			6.4	0.000544	0.00061			6.4	0.0586888	0.0406376	0.0215625			6.4	0.0182604	0.00309747				6.4	0.0271521	-0.00725093	-0.0112432				6.4	0.0055984	0.00769152
			6.5	0.000364493	0.0105993	0.00013428	0.0001416			6.5	0.00719584	0.0040094	2.8076e-05	6.2256e-05			6.5	-0.00796252	-0.847889			6.5	0.000543	0.000612			6.5	-0.000712819	0.0307932	0.0197673			6.5	0.0154734	0.00309747				6.5	0.028451	-0.00172655	-0.00980475				6.5	0.00428298	0.00932108
			6.6	0.00206455	0.0105993	0.00013428	0.0001416			6.6	0.00853038	0.0040094	2.8076e-05	6.2256e-05			6.6	-0.00530882	-0.565309			6.6	0.000544	0.00061			6.6	0.00225726	0.0455598	0.0143819			6.6	0.0154734	0.00202196				6.6	0.028451	-0.00356801	-0.0112432				6.6	0.00296757	0.00932108
			6.7	-0.00133557	0.0123111	0.00013306	0.0001416			6.7	0.00853038	0.00192983	2.9297e-05	6.2256e-05			6.7	0.00265229	0.282429			6.7	0.000544	0.00061			6.7	0.00225726	0.050482	0.0125867			6.7	0.0168669	-0.000129061				6.7	0.028451	-0.00356801	-0.00548928				6.7	0.00428298	0.00932108
			6.8	0.000364493	0.0157347	0.00013428	0.00014404			6.8	0.0138685	0.0040094	2.8076e-05	6.2256e-05			6.8	-1.41531e-06	-0.000150709			6.8	0.000544	0.000609			6.8	0.0111675	0.0652486	0.016177			6.8	0.0140799	0.006324				6.8	0.0297499	-0.00725093	-0.0112432				6.8	0.00428298	0.0125802
			6.9	0.00376461	0.0157347	0.00013306	0.00014282			6.9	0.012534	0.00608896	2.8076e-05	6.2256e-05			6.9	-0.00353969	-0.376923			6.9	0.000543	0.000612			6.9	0.0230478	0.0800151	0.0125867			6.9	0.00571891	0.006324				6.9	0.0310488	-0.00725093	-0.00980475				6.9	0.00165216	0.00932108
			7	0.00376461	0.0157347	0.00013428	0.00014404			7	0.0111995	0.0040094	2.8076e-05	6.2256e-05			7	-0.00353969	-0.376923			7	0.000543	0.000612			7	0.0141376	0.050482	0.0179722			7	0.0098994	0.00309747				7	0.0323477	-0.00909239	-0.0141202				7	0.00428298	0.00606196
			7.1	-0.00133557	0.0174464	0.00013428	0.00014404			7.1	0.0111995	0.00608896	2.8076e-05	6.2256e-05			7.1	-0.00177055	-0.188537			7.1	0.000544	0.00061			7.1	0.0111675	0.0455598	0.0143819			7.1	0.00432541	-0.000129061				7.1	0.0310488	-0.00356801	-0.00692777				7.1	0.00822922	0.0109506
			7.2	0.000364493	0.0174464	0.00013184	0.00014404			7.2	0.012534	0.00608896	2.9297e-05	6.3477e-05			7.2	0.000883152	0.0940424			7.2	0.000544	0.000609			7.2	0.0230478	0.0406376	0.0125867			7.2	0.00432541	0.00417298				7.2	0.0297499	-0.00540947	-0.0112432				7.2	0.00691381	0.00769152
			7.3	0.000364493	0.0140229	0.00013306	0.00014404			7.3	0.0138685	0.00608896	3.1738e-05	6.1035e-05			7.3	0.000883152	0.0940424			7.3	0.000543	0.00061			7.3	0.0171077	0.0357154	0.00899644			7.3	0.0085059	0.00417298				7.3	0.0323477	-0.00540947	-0.00548928				7.3	0.00822922	0.00769152
			7.4	-0.00133557	0.0174464	0.00013428	0.00014282			7.4	0.00853038	0.0040094	3.418e-05	6.2256e-05			7.4	-0.000885983	-0.0943438			7.4	0.000544	0.00061			7.4	0.0141376	0.0455598	0.0143819			7.4	0.0098994	0.00309747				7.4	0.0336466	-0.00725093	-0.0112432				7.4	0.00428298	0.0125802
			7.5	-0.00133557	0.0140229	0.00013428	0.00014404			7.5	0.00986491	0.00192983	3.54e-05	6.2256e-05			7.5	-0.00265512	-0.28273			7.5	0.000543	0.000609			7.5	0.0141376	0.0800151	0.016177			7.5	0.0112929	0.00309747				7.5	0.0336466	-0.00356801	-0.00836626				7.5	0.00428298	0.0142098
			7.6	0.00376461	0.0123111	0.0001355	0.00014404			7.6	0.00986491	-0.000149728	3.418e-05	6.1035e-05			7.6	-0.00177055	-0.188537			7.6	0.000543	0.000608			7.6	0.0230478	0.0652486	0.016177			7.6	0.0112929	0.00202196				7.6	0.0336466	-0.00725093	-0.00548928				7.6	0.00296757	0.0125802
			7.7	0.00546468	0.0123111	0.00013428	0.00014526			7.7	0.012534	-0.000149728	3.2959e-05	6.1035e-05			7.7	-0.00707796	-0.753696			7.7	0.000544	0.000609			7.7	0.0141376	0.0603264	0.0143819			7.7	0.0085059	-0.00120457				7.7	0.0336466	-0.00540947	-0.00980475				7.7	0.00428298	0.0142098
			7.8	0.0088648	0.0123111	0.0001355	0.00014404			7.8	0.012534	0.00192983	3.0518e-05	6.1035e-05			7.8	-0.00530882	-0.565309			7.8	0.000546	0.000608			7.8	0.0200777	0.0209488	0.0107916			7.8	0.0126864	-0.00228008				7.8	0.0310488	-0.00725093	-0.0112432				7.8	0.000336746	0.0109506
			7.9	0.00376461	0.00717577	0.0001355	0.00014404			7.9	0.00986491	0.0040094	2.9297e-05	6.1035e-05			7.9	-0.00353969	-0.376923			7.9	0.000544	0.000609			7.9	0.0200777	0.0160267	0.00899644			7.9	0.00432541	0.00309747				7.9	0.0310488	-0.00172655	-0.0112432				7.9	0.000336746	0.00932108
			8	0.000364493	0.0123111	0.00013672	0.00014526			8	0.00986491	0.00816852	2.8076e-05	6.2256e-05			8	-0.00530882	-0.565309			8	0.000544	0.000608			8	0.0260179	0.050482	0.0107916			8	0.00571891	0.00524849				8	0.028451	-0.00909239	-0.00980475				8	0.00296757	0.0125802
			8.1	-0.00133557	0.0123111	0.0001355	0.00014526			8.1	0.00986491	0.00816852	2.8076e-05	6.2256e-05			8.1	-0.00530882	-0.565309			8.1	0.000546	0.000609			8.1	0.0200777	0.0849373	0.0107916			8.1	0.00571891	0.00417298				8.1	0.028451	-0.00540947	-0.00548928				8.1	0.00165216	0.0125802
			8.2	0.00716474	0.0123111	0.00013428	0.00014526			8.2	0.012534	0.00608896	2.8076e-05	6.1035e-05			8.2	-0.00442425	-0.471116			8.2	0.000544	0.00061			8.2	0.0171077	0.0406376	0.00899644			8.2	0.00711241	0.000946448				8.2	0.0297499	-0.00540947	0.000264682				8.2	0.00296757	0.0109506
			8.3	0.0122649	0.0140229	0.0001355	0.00014404			8.3	0.0111995	0.0040094	2.8076e-05	6.1035e-05			8.3	-0.00353969	-0.376923			8.3	0.000544	0.00061			8.3	0.0200777	0.0455598	0.0125867			8.3	0.0085059	-0.00335559				8.3	0.0310488	-0.00172655	0.00889563				8.3	0.000336746	0.00769152
			8.4	0.0224653	0.0157347	0.00013672	0.00014648			8.4	0.012534	-0.00222929	2.6855e-05	6.1035e-05			8.4	-0.00707796	-0.753696			8.4	0.000544	0.000612			8.4	0.0319581	0.0406376	0.0143819			8.4	0.0098994	-0.00120457				8.4	0.0323477	-0.00356801	0.021842				8.4	-0.000978667	0.00932108
			8.5	0.041166	0.0105993	0.00013672	0.00014526			8.5	0.012534	-0.000149728	2.8076e-05	6.2256e-05			8.5	-0.0123854	-1.31885			8.5	0.000544	0.00061			8.5	0.0260179	0.050482	0.0215625			8.5	0.0098994	-0.00120457				8.5	0.0297499	-0.00540947	0.021842				8.5	0.00165216	0.00769152
			8.6	0.013965	0.0123111	0.00013672	0.00014404			8.6	0.0152031	-0.00430885	2.9297e-05	6.1035e-05			8.6	-0.0106162	-1.13047			8.6	0.000544	0.00061			8.6	0.0171077	0.0701707	0.016177			8.6	0.0126864	0.00202196				8.6	0.0297499	-0.00725093	0.0160881				8.6	0.000336746	0.00932108
			8.7	0.015665	0.00888755	0.00013672	0.00014404			8.7	0.0178722	-0.000149728	2.9297e-05	6.1035e-05			8.7	-0.00973166	-1.03627			8.7	0.000543	0.000612			8.7	0.028988	0.0701707	0.016177			8.7	0.00432541	0.00202196				8.7	0.0310488	-0.00725093	0.000264682				8.7	0.00165216	0.0109506
			8.8	0.013965	0.0105993	0.00013672	0.00014648			8.8	0.0111995	-0.00222929	2.9297e-05	6.1035e-05			8.8	-0.00796252	-0.847889			8.8	0.000544	0.000612			8.8	0.0230478	0.0455598	0.016177			8.8	0.00153842	0.006324				8.8	0.0336466	-0.00356801	0.000264682				8.8	0.000336746	0.00769152
			8.9	0.0173651	0.00717577	0.00013672	0.00014526			8.9	0.0111995	-0.00430885	2.9297e-05	6.1035e-05			8.9	-0.00619339	-0.659502			8.9	0.000543	0.00061			8.9	0.0200777	0.0455598	0.0125867			8.9	0.00571891	0.00417298				8.9	0.0323477	-0.00725093	-0.00405079				8.9	0.00165216	0.00769152
			9	0.0224653	0.00888755	0.00013672	0.00014648			9	0.0111995	-0.00430885	2.9297e-05	6.1035e-05			9	-0.00884709	-0.942082			9	0.000543	0.000612			9	0.00225726	0.0357154	0.0143819			9	0.0085059	0.00202196				9	0.0349455	0.000114907	-0.00117381				9	0.00428298	0.00932108
			9.1	0.0207652	0.00717577	0.00013794	0.00014648			9.1	0.0138685	0.0040094	2.8076e-05	6.1035e-05			9.1	-0.0123854	-1.31885			9.1	0.000546	0.000612			9.1	0.0230478	0.050482	0.0125867			9.1	0.00571891	-0.000129061				9.1	0.0336466	0.00379782	-0.00836626				9.1	0.00165216	0.00769152
			9.2	0.0190652	0.0123111	0.00013794	0.00014526			9.2	0.0152031	0.0040094	2.9297e-05	6.1035e-05			9.2	-0.0106162	-1.13047			9.2	0.000546	0.000612			9.2	0.0230478	0.050482	0.0125867			9.2	0.0112929	0.000946448				9.2	0.0323477	0.0148466	-0.00836626				9.2	0.00428298	0.0109506
			9.3	0.0173651	0.0174464	0.00013672	0.00014648			9.3	0.0111995	0.00816852	2.8076e-05	5.9814e-05			9.3	-0.00973166	-1.03627			9.3	0.000546	0.00061			9.3	0.0200777	0.0849373	0.0179722			9.3	0.0098994	0.000946448				9.3	0.0349455	0.0295782	-0.00692777				9.3	-0.000978667	0.0142098
			9.4	0.0190652	0.0191582	0.00013916	0.00014648			9.4	0.0111995	0.0040094	2.9297e-05	5.9814e-05			9.4	-0.00884709	-0.942082			9.4	0.000546	0.000609			9.4	0.0200777	0.0800151	0.016177			9.4	0.0098994	0.000946448				9.4	0.0375433	0.0240539	-0.00836626				9.4	0.00296757	0.00932108
			9.5	0.0122649	0.0191582	0.00013916	0.00014526			9.5	0.0138685	-0.000149728	2.9297e-05	5.8594e-05			9.5	-0.00884709	-0.942082			9.5	0.000546	0.000612			9.5	0.028988	0.0554042	0.0197673			9.5	0.0085059	0.006324				9.5	0.0401411	0.0111637	-0.00692777				9.5	0.00165216	0.0109506
			9.6	0.0088648	0.0260053	0.00013794	0.00014526			9.6	0.0138685	-0.000149728	2.9297e-05	5.9814e-05			9.6	-0.00973166	-1.03627			9.6	0.000546	0.000612			9.6	0.0171077	0.0357154	0.016177			9.6	0.0085059	0.0073995				9.6	0.04144	0.0130051	-0.00836626				9.6	0.00296757	0.00932108
			9.7	0.0105649	0.067088	0.00013916	0.00014648			9.7	0.0111995	-0.00430885	2.9297e-05	6.1035e-05			9.7	-0.00973166	-1.03627			9.7	0.000544	0.000612			9.7	0.0141376	0.0307932	0.0143819			9.7	0.0126864	0.00309747				9.7	0.0388422	0.00379782	-0.0112432				9.7	0.00428298	0.0174689
			9.8	0.0105649	0.109882	0.00013916	0.00014648			9.8	0.0111995	-0.000149728	2.8076e-05	6.1035e-05			9.8	-0.0115008	-1.22466			9.8	0.000546	0.000612			9.8	0.0141376	0.0406376	0.0107916			9.8	0.0112929	0.000946448				9.8	0.0375433	0.00195637	-0.00692777				9.8	0.00296757	0.0288758
			9.9	0.0088648	0.0807822	0.00013916	0.00014404			9.9	0.0111995	0.0144072	2.8076e-05	5.9814e-05			9.9	-0.0132699	-1.41305			9.9	0.000547	0.000612			9.9	0.0260179	0.0603264	0.0125867			9.9	0.0126864	-0.0044311				9.9	0.0388422	0.00379782	-0.00980475				9.9	0.00165216	0.0386532
			10	0.00546468	0.067088	0.00013916	0.00014648			10	0.012534	0.0102481	2.8076e-05	5.9814e-05			10	-0.0141545	-1.50724			10	0.000547	0.000613			10	0.0230478	0.0701707	0.0125867			10	0.0112929	0.000946448				10	0.0388422	0.00748074	-0.00836626				10	0.000336746	0.0370236
			10.1	0.00716474	0.0636644	0.00014038	0.00014526			10.1	0.012534	0.0123276	2.9297e-05	6.1035e-05			10.1	-0.0185773	-1.97821			10.1	0.000546	0.000612			10.1	0.0171077	0.0554042	0.016177			10.1	0.00711241	-0.00550661				10.1	0.0401411	0.00379782	-0.00548928				10.1	0.00428298	0.035394
			10.2	0.00376461	0.0482584	0.00014282	0.00014526			10.2	0.0111995	0.0518393	2.8076e-05	6.2256e-05			10.2	-0.0185773	-1.97821			10.2	0.000547	0.000612			10.2	0.0171077	0.025871	0.0125867			10.2	0.00711241	-0.00550661				10.2	0.04144	0.00195637	-0.00980475				10.2	0.00691381	0.0190984
			10.3	0.00716474	0.0396996	0.0001416	0.00014648			10.3	0.0138685	0.0435211	2.9297e-05	6.2256e-05			10.3	-0.0141545	-1.50724			10.3	0.000547	0.000612			10.3	0.0260179	0.0209488	0.0143819			10.3	0.00293192	-0.0044311				10.3	0.0388422	0.00195637	-0.00836626				10.3	0.00954464	0.0190984
			10.4	0.00716474	0.0396996	0.00014038	0.00014526			10.4	0.012534	0.0268846	2.9297e-05	6.1035e-05			10.4	-0.0106162	-1.13047			10.4	0.000547	0.000612			10.4	0.0171077	0.0357154	0.0125867			10.4	0.000144924	-0.00228008				10.4	0.0375433	0.00195637	-0.00980475				10.4	0.0161217	0.0223576
			10.5	0.00716474	0.0277171	0.00014038	0.00014771			10.5	0.0245448	0.024805	2.9297e-05	5.9814e-05			10.5	-0.00707796	-0.753696			10.5	0.000547	0.000612			10.5	0.0200777	0.0455598	0.0197673			10.5	0.0085059	-0.00550661				10.5	0.0388422	0.00379782	-0.00548928				10.5	0.0187525	0.0158393
			10.6	0.00716474	0.0225818	0.00014038	0.00014648			10.6	0.0111995	0.0227255	2.9297e-05	6.1035e-05			10.6	-0.00973166	-1.03627			10.6	0.000546	0.000613			10.6	0.028988	0.0701707	0.0179722			10.6	0.0098994	-0.0044311				10.6	0.04144	0.00195637	-0.00692777				10.6	0.0200679	0.0190984
			10.7	0.00546468	0.02087	0.00014038	0.00014648			10.7	0.00719584	0.0164868	3.0518e-05	6.1035e-05			10.7	-0.0106162	-1.13047			10.7	0.000546	0.00061			10.7	0.0230478	0.0652486	0.016177			10.7	0.0098994	-0.00765763				10.7	0.04144	0.00563928	-0.00548928				10.7	0.0174371	0.0190984
			10.8	0.00206455	0.02087	0.0001416	0.00014526			10.8	0.00986491	0.0164868	3.0518e-05	6.2256e-05			10.8	-0.00884709	-0.942082			10.8	0.000547	0.000613			10.8	0.0141376	0.0406376	0.016177			10.8	0.0085059	-0.00658212				10.8	0.0427389	0.00195637	-0.00692777				10.8	0.0148063	0.0125802
			10.9	0.00206455	0.0225818	0.00014038	0.00014648			10.9	0.0152031	0.0102481	3.0518e-05	6.2256e-05			10.9	-0.0106162	-1.13047			10.9	0.000546	0.000612			10.9	0.0200777	0.025871	0.0143819			10.9	0.0112929	-0.00658212				10.9	0.0388422	0.00748074	-0.00405079				10.9	0.0121755	0.0158393
			11	0.00546468	0.02087	0.0001416	0.00014648			11	0.0192067	0.00816852	2.9297e-05	6.2256e-05			11	-0.00973166	-1.03627			11	0.000546	0.000612			11	0.0349281	0.0406376	0.0125867			11	0.00571891	-0.00228008				11	0.0375433	0.00379782	-0.0112432				11	0.00822922	0.0142098
			11.1	0.0088648	0.0191582	0.00014038	0.00014648			11.1	0.0165376	0.00192983	2.9297e-05	6.1035e-05			11.1	-0.00973166	-1.03627			11.1	0.000546	0.000612			11.1	0.028988	0.0357154	0.0143819			11.1	0.0126864	-0.000129061				11.1	0.0401411	0.00379782	-0.00692777				11.1	0.00954464	0.0142098
			11.2	0.0088648	0.0242936	0.00014038	0.00014648			11.2	0.0152031	0.00608896	3.1738e-05	6.1035e-05			11.2	-0.0132699	-1.41305			11.2	0.000544	0.000613			11.2	0.028988	0.0800151	0.0143819			11.2	0.0126864	0.000946448				11.2	0.04144	0.00379782	-0.00836626				11.2	0.00691381	0.020728
			11.3	0.0122649	0.0260053	0.00013916	0.00014771			11.3	0.0152031	0.00192983	3.1738e-05	6.1035e-05			11.3	-0.0115008	-1.22466			11.3	0.000546	0.000613			11.3	0.0260179	0.0800151	0.0179722			11.3	0.0126864	0.000946448				11.3	0.0427389	0.00563928	-0.00548928				11.3	0.01086	0.0158393
			11.4	0.0088648	0.0260053	0.00014038	0.00014771			11.4	0.0152031	0.00816852	3.0518e-05	5.9814e-05			11.4	-0.00973166	-1.03627			11.4	0.000546	0.000614			11.4	0.0200777	0.0603264	0.0215625			11.4	0.0085059	-0.00120457				11.4	0.0453367	0.00379782	-0.00692777				11.4	0.00954464	0.0174689
			11.5	0.0122649	0.02087	0.0001416	0.00014771			11.5	0.0192067	0.0102481	3.0518e-05	5.9814e-05			11.5	-0.00884709	-0.942082			11.5	0.000546	0.000613			11.5	0.0230478	0.0406376	0.0179722			11.5	0.0098994	-0.0044311				11.5	0.0440378	0.00563928	-0.00692777				11.5	0.00822922	0.0158393
			11.6	0.0088648	0.0174464	0.0001416	0.00014648			11.6	0.0152031	0.0144072	3.0518e-05	5.9814e-05			11.6	-0.0106162	-1.13047			11.6	0.000546	0.000612			11.6	0.0200777	0.0357154	0.0143819			11.6	0.0085059	-0.00120457				11.6	0.0440378	0.00563928	-0.00692777				11.6	0.00954464	0.0158393
			11.7	0.0105649	0.0225818	0.0001416	0.00014648			11.7	0.0152031	0.0185663	3.0518e-05	5.7373e-05			11.7	-0.0115008	-1.22466			11.7	0.000546	0.000612			11.7	0.0349281	0.0209488	0.0143819			11.7	0.0140799	-0.00120457				11.7	0.0440378	0.00379782	-0.00980475				11.7	0.0055984	0.0158393
			11.8	0.00716474	0.0174464	0.00014282	0.00014648			11.8	0.0165376	0.0164868	2.9297e-05	5.8594e-05			11.8	-0.0141545	-1.50724			11.8	0.000546	0.000613			11.8	0.0260179	0.0455598	0.0143819			11.8	0.0126864	0.000946448				11.8	0.0453367	0.00563928	-0.00692777				11.8	0.01086	0.0142098
			11.9	0.0122649	0.0174464	0.00014282	0.00014648			11.9	0.0192067	0.0102481	3.0518e-05	5.9814e-05			11.9	-0.0123854	-1.31885			11.9	0.000546	0.000613			11.9	0.0260179	0.0997039	0.016177			11.9	0.0098994	-0.000129061				11.9	0.0453367	0.00379782	-0.00836626				11.9	0.00954464	0.0125802
			12	0.0105649	0.0191582	0.0001416	0.00014526			12	0.0165376	0.0102481	3.1738e-05	5.9814e-05			12	-0.0123854	-1.31885			12	0.000546	0.000613			12	0.028988	0.0849373	0.016177			12	0.0126864	0.00202196				12	0.0479345	0.00379782	-0.0112432				12	0.0121755	0.0142098
			12.1	0.0122649	0.02087	0.0001416	0.00014648			12.1	0.0165376	0.0102481	3.1738e-05	5.9814e-05			12.1	-0.0150391	-1.60143			12.1	0.000546	0.000613			12.1	0.028988	0.050482	0.0179722			12.1	0.0098994	0.000946448				12.1	0.0466356	0.0111637	-0.0126817				12.1	0.00954464	0.00769152
			12.2	0.015665	0.0174464	0.0001416	0.00014526			12.2	0.0245448	0.0102481	3.0518e-05	5.9814e-05			12.2	-0.0150391	-1.60143			12.2	0.000546	0.000613			12.2	0.0230478	0.0406376	0.0179722			12.2	0.0112929	-0.00120457				12.2	0.0440378	0.0111637	-0.00692777				12.2	0.01086	0.0109506
			12.3	0.015665	0.0191582	0.0001416	0.00014526			12.3	0.0218758	0.0040094	3.1738e-05	5.9814e-05			12.3	-0.0150391	-1.60143			12.3	0.000546	0.000613			12.3	0.0230478	0.0357154	0.016177			12.3	0.0085059	-0.0044311				12.3	0.0453367	0.00748074	-0.0026123				12.3	0.01086	0.0142098
			12.4	0.0173651	0.0191582	0.00014282	0.00014648			12.4	0.0205412	0.00608896	3.1738e-05	5.9814e-05			12.4	-0.0123854	-1.31885			12.4	0.000546	0.000613			12.4	0.0260179	0.0652486	0.0197673			12.4	0.0085059	-0.00980865				12.4	0.0466356	0.0111637	-0.00117381				12.4	0.00822922	0.0109506
			12.5	0.015665	0.02087	0.0001416	0.00014771			12.5	0.0192067	0.00608896	3.1738e-05	6.1035e-05			12.5	-0.00973166	-1.03627			12.5	0.000546	0.000613			12.5	0.0260179	0.0849373	0.0233577			12.5	0.00711241	-0.0119597				12.5	0.0453367	0.0111637	-0.00405079				12.5	0.0148063	0.0158393
			12.6	0.013965	0.0225818	0.00014038	0.00014648			12.6	0.0165376	-0.000149728	3.1738e-05	5.9814e-05			12.6	-0.00884709	-0.942082			12.6	0.000546	0.000613			12.6	0.0260179	0.0750929	0.0197673			12.6	0.0098994	-0.00980865				12.6	0.0479345	0.0130051	-0.0026123				12.6	0.01086	0.0158393
			12.7	0.013965	0.0242936	0.0001416	0.00014526			12.7	0.0205412	0.00608896	3.1738e-05	5.9814e-05			12.7	-0.00796252	-0.847889			12.7	0.000547	0.000613			12.7	0.0260179	0.0554042	0.016177			12.7	0.00711241	-0.0130352				12.7	0.0492334	0.0093222	-0.00692777				12.7	0.0121755	0.0109506
			12.8	0.0122649	0.0225818	0.00014282	0.00014648			12.8	0.0205412	0.00192983	3.1738e-05	5.9814e-05			12.8	-0.00884709	-0.942082			12.8	0.000546	0.000615			12.8	0.0349281	0.0406376	0.0179722			12.8	0.0098994	-0.00658212				12.8	0.0492334	0.0148466	-0.00405079				12.8	0.0121755	0.0174689
			12.9	0.0122649	0.0191582	0.0001416	0.00014771			12.9	0.0178722	0.00816852	3.1738e-05	6.1035e-05			12.9	-0.0106162	-1.13047			12.9	0.000546	0.000614			12.9	0.0319581	0.0455598	0.0143819			12.9	0.00571891	-0.00228008				12.9	0.0479345	0.0093222	-0.00548928				12.9	0.0134909	0.0142098
			13	0.0105649	0.0191582	0.0001416	0.00014648			13	0.0165376	0.0102481	3.2959e-05	6.1035e-05			13	-0.0106162	-1.13047			13	0.000547	0.000613			13	0.028988	0.0603264	0.0179722			13	0.0085059	-0.00550661				13	0.0466356	0.0130051	-0.00117381				13	0.00954464	0.0142098
			13.1	0.0105649	0.0191582	0.00014282	0.00014648			13.1	0.0192067	0.0102481	3.0518e-05	5.9814e-05			13.1	-0.00973166	-1.03627			13.1	0.000546	0.000614			13.1	0.0260179	0.0898595	0.0179722			13.1	0.0126864	-0.00873314				13.1	0.0466356	0.0111637	-0.00548928				13.1	0.00822922	0.0174689
			13.2	0.00716474	0.0174464	0.00014282	0.00014648			13.2	0.0245448	0.0040094	3.1738e-05	6.1035e-05			13.2	-0.0106162	-1.13047			13.2	0.000546	0.000615			13.2	0.0260179	0.0554042	0.0197673			13.2	0.0126864	-0.00550661				13.2	0.0466356	0.0130051	-0.00405079				13.2	0.0134909	0.0142098
			13.3	0.0088648	0.0191582	0.00014404	0.00014771			13.3	0.0192067	0.00608896	3.1738e-05	5.9814e-05			13.3	-0.0123854	-1.31885			13.3	0.000544	0.000613			13.3	0.0171077	0.0652486	0.0233577			13.3	0.0112929	-0.00550661				13.3	0.0440378	0.0093222	-0.00548928				13.3	0.01086	0.0142098
			13.4	0.0088648	0.0174464	0.00014282	0.00014771			13.4	0.0192067	0.0040094	3.0518e-05	6.1035e-05			13.4	-0.0150391	-1.60143			13.4	0.000546	0.000614			13.4	0.0141376	0.0603264	0.0233577			13.4	0.0112929	-0.00765763				13.4	0.0440378	0.0130051	-0.00836626				13.4	0.0134909	0.0142098
			13.5	0.013965	0.0157347	0.00014404	0.00014648			13.5	0.0205412	0.00608896	3.1738e-05	6.1035e-05			13.5	-0.0141545	-1.50724			13.5	0.000547	0.000614			13.5	0.028988	0.0849373	0.0197673			13.5	0.0140799	-0.00873314				13.5	0.0440378	0.0111637	-0.00548928				13.5	0.0134909	0.0142098
			13.6	0.0122649	0.0174464	0.00014282	0.00014771			13.6	0.0245448	0.00816852	3.1738e-05	5.9814e-05			13.6	-0.0132699	-1.41305			13.6	0.000547	0.000612			13.6	0.0260179	0.0750929	0.016177			13.6	0.0098994	-0.00765763				13.6	0.0440378	0.0111637	-0.00117381				13.6	0.0134909	0.0174689
			13.7	0.0122649	0.0191582	0.00014282	0.00014648			13.7	0.0245448	0.00608896	3.0518e-05	5.9814e-05			13.7	-0.0115008	-1.22466			13.7	0.000547	0.000615			13.7	0.0200777	0.0947817	0.016177			13.7	0.0112929	-0.0044311				13.7	0.0453367	0.0130051	-0.0026123				13.7	0.0134909	0.0142098
			13.8	0.00716474	0.02087	0.00014404	0.00014771			13.8	0.0205412	0.00608896	3.0518e-05	6.1035e-05			13.8	-0.0123854	-1.31885			13.8	0.000547	0.000614			13.8	0.0200777	0.0997039	0.016177			13.8	0.0140799	-0.000129061				13.8	0.0453367	0.0093222	0.00170317				13.8	0.0134909	0.0142098
			13.9	0.00546468	0.0225818	0.00014282	0.00014648			13.9	0.0205412	0.0123276	3.1738e-05	6.1035e-05			13.9	-0.0141545	-1.50724			13.9	0.000547	0.000613			13.9	0.028988	0.0849373	0.0197673			13.9	0.0154734	0.000946448				13.9	0.0453367	0.0093222	0.000264682				13.9	0.0161217	0.0174689
			14	0.0088648	0.0191582	0.00014404	0.00014771			14	0.0218758	0.00816852	3.1738e-05	6.1035e-05			14	-0.0141545	-1.50724			14	0.000548	0.000613			14	0.0200777	0.0455598	0.0197673			14	0.0182604	-0.00550661				14	0.0479345	0.00748074	-0.00117381				14	0.0161217	0.0174689
			14.1	0.0088648	0.0191582	0.00014282	0.00014893			14.1	0.0218758	0.0144072	2.9297e-05	6.1035e-05			14.1	-0.0123854	-1.31885			14.1	0.000547	0.000615			14.1	0.0200777	0.0455598	0.0215625			14.1	0.0182604	-0.0119597				14.1	0.0453367	0.00748074	-0.00117381				14.1	0.0174371	0.0190984
			14.2	0.0105649	0.0242936	0.00014404	0.00014893			14.2	0.0192067	0.0123276	3.1738e-05	6.1035e-05			14.2	-0.0106162	-1.13047			14.2	0.000548	0.000613			14.2	0.0260179	0.0849373	0.0197673			14.2	0.0154734	-0.00765763				14.2	0.0466356	0.0093222	-0.0026123				14.2	0.0121755	0.0223576
			14.3	0.0122649	0.0225818	0.00014282	0.00014893			14.3	0.0192067	0.00816852	3.0518e-05	6.2256e-05			14.3	-0.00973166	-1.03627			14.3	0.000547	0.000613			14.3	0.0260179	0.0997039	0.0215625			14.3	0.0154734	-0.00873314				14.3	0.0492334	0.0093222	0.000264682				14.3	0.0161217	0.0174689
			14.4	0.0122649	0.02087	0.00014404	0.00014893			14.4	0.0192067	0.0040094	3.0518e-05	6.2256e-05			14.4	-0.0132699	-1.41305			14.4	0.000547	0.000613			14.4	0.0200777	0.0849373	0.026948			14.4	0.0140799	-0.00550661				14.4	0.0505323	0.0148466	-0.00117381				14.4	0.0148063	0.020728
			14.5	0.013965	0.0191582	0.00014404	0.00014771			14.5	0.0205412	0.0102481	3.0518e-05	6.2256e-05			14.5	-0.0141545	-1.50724			14.5	0.000548	0.000614			14.5	0.0171077	0.0603264	0.0251528			14.5	0.0140799	-0.00658212				14.5	0.0518312	0.0130051	0.00458015				14.5	0.0161217	0.0174689
			14.6	0.0122649	0.0174464	0.00014404	0.00014893			14.6	0.0205412	0.0102481	2.9297e-05	6.2256e-05			14.6	-0.0141545	-1.50724			14.6	0.000547	0.000614			14.6	0.0200777	0.0455598	0.0215625			14.6	0.0154734	-0.00550661				14.6	0.0531301	0.0111637	-0.00117381				14.6	0.0161217	0.0174689
			14.7	0.015665	0.0140229	0.00014404	0.00014771			14.7	0.0152031	0.00816852	2.9297e-05	6.1035e-05			14.7	-0.0132699	-1.41305			14.7	0.000547	0.000614			14.7	0.0200777	0.0603264	0.0215625			14.7	0.0182604	-0.00873314				14.7	0.0505323	0.016688	0.00314166				14.7	0.0161217	0.0223576
			14.8	0.0173651	0.0157347	0.00014404	0.00014771			14.8	0.0152031	0.00192983	2.8076e-05	6.1035e-05			14.8	-0.0150391	-1.60143			14.8	0.000547	0.000615			14.8	0.0171077	0.0898595	0.0143819			14.8	0.0182604	-0.00765763				14.8	0.0518312	0.00748074	0.00170317				14.8	0.0161217	0.020728
			14.9	0.0173651	0.0191582	0.00014404	0.00014771			14.9	0.0192067	0.00608896	2.8076e-05	6.1035e-05			14.9	-0.0132699	-1.41305			14.9	0.000547	0.000613			14.9	0.0230478	0.0997039	0.0179722			14.9	0.0210474	-0.00980865				14.9	0.0531301	0.0130051	0.00889563				14.9	0.0134909	0.020728
			15	0.0173651	0.0174464	0.00014526	0.00014771			15	0.0218758	0.00608896	2.8076e-05	6.2256e-05			15	-0.0168082	-1.78982			15	0.000546	0.000615			15	0.0200777	0.0603264	0.0215625			15	0.0224409	-0.00765763				15	0.0557279	0.0111637	0.000264682				15	0.0174371	0.0223576
			15.1	0.015665	0.0174464	0.00014526	0.00014771			15.1	0.0178722	0.0040094	2.9297e-05	6.2256e-05			15.1	-0.0168082	-1.78982			15.1	0.000546	0.000614			15.1	0.0171077	0.0603264	0.0179722			15.1	0.0210474	-0.00658212				15.1	0.054429	0.0130051	0.00601864				15.1	0.0174371	0.0190984
			15.2	0.0190652	0.0242936	0.00014526	0.00014648			15.2	0.0192067	0.0144072	3.418e-05	6.1035e-05			15.2	-0.0141545	-1.50724			15.2	0.000547	0.000614			15.2	0.0171077	0.0455598	0.0233577			15.2	0.0224409	-0.00120457				15.2	0.0557279	0.0130051	0.00458015				15.2	0.0161217	0.0190984
			15.3	0.0190652	0.0225818	0.00014526	0.00014771			15.3	0.0232103	0.0123276	3.6621e-05	6.2256e-05			15.3	-0.0106162	-1.13047			15.3	0.000547	0.000615			15.3	0.0260179	0.0603264	0.0233577			15.3	0.0252279	-0.00228008				15.3	0.0557279	0.0111637	0.00314166				15.3	0.0187525	0.0239871
			15.4	0.013965	0.0260053	0.00014526	0.00014771			15.4	0.0218758	0.0144072	3.6621e-05	6.2256e-05			15.4	-0.00707796	-0.753696			15.4	0.000547	0.000614			15.4	0.0230478	0.0947817	0.0233577			15.4	0.0224409	-0.00550661				15.4	0.054429	0.0093222	0.00889563				15.4	0.0134909	0.0223576
			15.5	0.015665	0.0277171	0.00014526	0.00014893			15.5	0.0272139	0.0164868	3.54e-05	6.2256e-05			15.5	-0.0132699	-1.41305			15.5	0.000547	0.000614			15.5	0.0171077	0.0947817	0.0215625			15.5	0.0154734	-0.0044311				15.5	0.0570268	0.0148466	0.00314166				15.5	0.0161217	0.0256167
			15.6	0.0173651	0.0277171	0.00014526	0.00014648			15.6	0.0232103	0.00816852	3.418e-05	6.3477e-05			15.6	-0.0159236	-1.69563			15.6	0.000546	0.000615			15.6	0.0230478	0.0750929	0.0215625			15.6	0.0196539	-0.00765763				15.6	0.0531301	0.0130051	0.00889563				15.6	0.0148063	0.0239871
			15.7	0.015665	0.0294289	0.00014526	0.00014771			15.7	0.0218758	0.00608896	3.2959e-05	6.3477e-05			15.7	-0.0221156	-2.35498			15.7	0.000547	0.000615			15.7	0.028988	0.0554042	0.0215625			15.7	0.0224409	-0.00765763				15.7	0.0518312	0.0130051	0.00745714				15.7	0.0200679	0.0190984
			15.8	0.0173651	0.0328524	0.00014526	0.00014771			15.8	0.0245448	0.00816852	3.0518e-05	6.2256e-05			15.8	-0.021231	-2.26079			15.8	0.000547	0.000614			15.8	0.0200777	0.0652486	0.0197673			15.8	0.0210474	-0.00765763				15.8	0.054429	0.0111637	0.0103341				15.8	0.0174371	0.0256167
			15.9	0.015665	0.0311407	0.00014526	0.00014771			15.9	0.0258794	0.0102481	3.0518e-05	6.2256e-05			15.9	-0.0203465	-2.16659			15.9	0.000547	0.000615			15.9	0.0171077	0.0750929	0.0215625			15.9	0.0238344	-0.00658212				15.9	0.0505323	0.0130051	0.00314166				15.9	0.0174371	0.020728
			16	0.0173651	0.0328524	0.00014648	0.00014771			16	0.0232103	0.00608896	2.9297e-05	6.2256e-05			16	-0.0115008	-1.22466			16	0.000546	0.000614			16	0.0260179	0.0800151	0.0233577			16	0.0210474	-0.00335559				16	0.0518312	0.0093222	0.0103341				16	0.0174371	0.0223576
			16.1	0.0190652	0.0311407	0.00014648	0.00014771			16.1	0.0258794	0.00816852	2.9297e-05	6.1035e-05			16.1	-0.0106162	-1.13047			16.1	0.000546	0.000614			16.1	0.0260179	0.0997039	0.0197673			16.1	0.0154734	-0.00765763				16.1	0.0557279	0.0130051	0.00601864				16.1	0.0161217	0.0239871
			16.2	0.0173651	0.0311407	0.00014648	0.00014771			16.2	0.0258794	0.00192983	2.8076e-05	6.2256e-05			16.2	-0.0115008	-1.22466			16.2	0.000547	0.000615			16.2	0.0171077	0.0898595	0.0251528			16.2	0.0154734	-0.00980865				16.2	0.0557279	0.0130051	0.00889563				16.2	0.0174371	0.0239871
			16.3	0.015665	0.0294289	0.00014526	0.00014771			16.3	0.0272139	0.0040094	2.9297e-05	6.2256e-05			16.3	-0.0115008	-1.22466			16.3	0.000546	0.000615			16.3	0.0230478	0.0701707	0.0251528			16.3	0.0154734	-0.00980865				16.3	0.0583257	0.0130051	0.00889563				16.3	0.0200679	0.0256167
			16.4	0.015665	0.0294289	0.00014526	0.00014771			16.4	0.0338866	0.0040094	3.0518e-05	6.3477e-05			16.4	-0.00884709	-0.942082			16.4	0.000546	0.000614			16.4	0.028988	0.0701707	0.026948			16.4	0.0140799	-0.00980865				16.4	0.0596246	0.016688	0.00458015				16.4	0.0187525	0.0223576
			16.5	0.0190652	0.0277171	0.00014648	0.00014771			16.5	0.029883	0.00816852	2.9297e-05	6.4697e-05			16.5	-0.000885983	-0.0943438			16.5	0.000546	0.000614			16.5	0.0230478	0.0750929	0.026948			16.5	0.0154734	-0.00765763				16.5	0.0583257	0.0148466	0.00745714				16.5	0.0200679	0.0272462
			16.6	0.0173651	0.0277171	0.00014404	0.00014771			16.6	0.0312175	0.0123276	2.8076e-05	6.3477e-05			16.6	0.00265229	0.282429			16.6	0.000546	0.000613			16.6	0.0200777	0.0947817	0.0287431			16.6	0.0154734	-0.00765763				16.6	0.0557279	0.0130051	0.00601864				16.6	0.0174371	0.0288758
			16.7	0.015665	0.0277171	0.00014526	0.00014771			16.7	0.0338866	0.0123276	2.9297e-05	6.2256e-05			16.7	-1.41531e-06	-0.000150709			16.7	0.000546	0.000614			16.7	0.0171077	0.0997039	0.0233577			16.7	0.0182604	-0.00980865				16.7	0.0557279	0.0130051	0.00745714				16.7	0.0200679	0.0256167
			16.8	0.0190652	0.0311407	0.00014404	0.00014771			16.8	0.0338866	0.0102481	2.9297e-05	6.3477e-05			16.8	-1.41531e-06	-0.000150709			16.8	0.000546	0.000615			16.8	0.0260179	0.0800151	0.0215625			16.8	0.0140799	-0.00765763				16.8	0.0557279	0.0148466	0.00889563				16.8	0.0200679	0.0272462
			16.9	0.013965	0.0294289	0.00014526	0.00014893			16.9	0.0338866	0.0144072	2.9297e-05	6.2256e-05			16.9	-1.41531e-06	-0.000150709			16.9	0.000547	0.000614			16.9	0.0171077	0.0701707	0.0215625			16.9	0.0210474	-0.00765763				16.9	0.0596246	0.0148466	0.00745714				16.9	0.0213834	0.0321349
			17	0.013965	0.0294289	0.00014404	0.00014648			17	0.0312175	0.0144072	2.8076e-05	6.2256e-05			17	0.00442142	0.470815			17	0.000547	0.000615			17	0.0200777	0.0652486	0.0233577			17	0.0210474	-0.0108842				17	0.0583257	0.016688	0.00889563				17	0.0213834	0.0272462
			17.1	0.015665	0.0311407	0.00014404	0.00014771			17.1	0.0338866	0.0102481	2.8076e-05	6.2256e-05			17.1	0.00442142	0.470815			17.1	0.000547	0.000614			17.1	0.0230478	0.0849373	0.0251528			17.1	0.0182604	-0.0108842				17.1	0.0622223	0.016688	0.00601864				17.1	0.0213834	0.0288758
			17.2	0.015665	0.0328524	0.00014648	0.00014771			17.2	0.0352212	0.0144072	2.9297e-05	6.1035e-05			17.2	0.00619056	0.659201			17.2	0.000548	0.000615			17.2	0.0260179	0.0898595	0.0251528			17.2	0.0168669	-0.00980865				17.2	0.0596246	0.0148466	0.0103341				17.2	0.0187525	0.0272462
			17.3	0.013965	0.0328524	0.00014526	0.00014893			17.3	0.0445629	0.0102481	2.9297e-05	6.2256e-05			17.3	-1.41531e-06	-0.000150709			17.3	0.000549	0.000614			17.3	0.0141376	0.0997039	0.0251528			17.3	0.0182604	-0.00873314				17.3	0.0648201	0.0130051	0.00745714				17.3	0.0174371	0.0305054
			17.4	0.0190652	0.0311407	0.00014526	0.00014893			17.4	0.0405593	0.0123276	2.9297e-05	6.1035e-05			17.4	-0.00442425	-0.471116			17.4	0.000548	0.000613			17.4	0.0200777	0.0849373	0.026948			17.4	0.0168669	-0.00765763				17.4	0.0648201	0.0185295	0.0103341				17.4	0.0226988	0.0321349
			17.5	0.013965	0.0345642	0.00014648	0.00014771			17.5	0.0378902	0.00608896	2.8076e-05	6.2256e-05			17.5	-0.00442425	-0.471116			17.5	0.000548	0.000613			17.5	0.0260179	0.0652486	0.0305383			17.5	0.0196539	-0.00873314				17.5	0.066119	0.016688	0.0103341				17.5	0.0213834	0.0288758
			17.6	0.015665	0.036276	0.00014648	0.00014771			17.6	0.0378902	0.0102481	2.8076e-05	6.1035e-05			17.6	-0.00707796	-0.753696			17.6	0.000548	0.000614			17.6	0.0171077	0.0750929	0.0341286			17.6	0.0224409	-0.00658212				17.6	0.0674179	0.0148466	0.0160881				17.6	0.0253296	0.0272462
			17.7	0.0173651	0.036276	0.00014648	0.00015015			17.7	0.0445629	0.0144072	2.9297e-05	6.1035e-05			17.7	-0.000885983	-0.0943438			17.7	0.000548	0.000614			17.7	0.0141376	0.0652486	0.0305383			17.7	0.0238344	-0.00228008				17.7	0.0635212	0.0148466	0.0103341				17.7	0.0240142	0.0305054
			17.8	0.015665	0.0345642	0.00014526	0.00014893			17.8	0.0432284	0.0144072	2.9297e-05	6.1035e-05			17.8	-0.00265512	-0.28273			17.8	0.000547	0.000613			17.8	0.0200777	0.0800151	0.0305383			17.8	0.0266214	-0.00658212				17.8	0.0609235	0.0148466	0.0117726				17.8	0.026645	0.0288758
			17.9	0.0122649	0.0328524	0.00014648	0.00014893			17.9	0.047232	0.0164868	3.0518e-05	6.1035e-05			17.9	-0.00442425	-0.471116			17.9	0.000547	0.000613			17.9	0.028988	0.109548	0.0305383			17.9	0.0252279	-0.0184127				17.9	0.0622223	0.016688	0.0132111				17.9	0.0226988	0.0305054
			18	0.0105649	0.0311407	0.00014648	0.00014771			18	0.0418939	0.0123276	2.9297e-05	6.1035e-05			18	-1.41531e-06	-0.000150709			18	0.000546	0.000614			18	0.0200777	0.104626	0.026948			18	0.0252279	-0.0194882				18	0.0609235	0.0148466	0.0117726				18	0.026645	0.0288758
			18.1	0.015665	0.0311407	0.00014648	0.00014893			18.1	0.0405593	0.00816852	3.0518e-05	6.2256e-05			18.1	0.00530599	0.565008			18.1	0.000547	0.000614			18.1	0.0200777	0.0849373	0.0287431			18.1	0.0321953	-0.0205637				18.1	0.0609235	0.0148466	0.0189651				18.1	0.0253296	0.0337645
			18.2	0.015665	0.0311407	0.00014648	0.00014893			18.2	0.0352212	0.0206459	3.0518e-05	6.2256e-05			18.2	0.00442142	0.470815			18.2	0.000548	0.000613			18.2	0.0230478	0.0652486	0.026948			18.2	0.0321953	-0.0162617				18.2	0.0622223	0.016688	0.0146496				18.2	0.0253296	0.0337645
			18.3	0.0122649	0.0260053	0.00014648	0.00014771			18.3	0.0325521	0.0227255	2.9297e-05	6.2256e-05			18.3	0.00619056	0.659201			18.3	0.000549	0.000614			18.3	0.0230478	0.0701707	0.0287431			18.3	0.0349823	-0.0162617				18.3	0.0622223	0.0185295	0.0175266				18.3	0.0279604	0.0305054
			18.4	0.013965	0.0260053	0.00014526	0.00014771			18.4	0.0418939	0.0206459	3.0518e-05	6.1035e-05			18.4	0.00619056	0.659201			18.4	0.000549	0.000614			18.4	0.0230478	0.0849373	0.026948			18.4	0.0363758	-0.0141107				18.4	0.0596246	0.0130051	0.0132111				18.4	0.0240142	0.035394
			18.5	0.015665	0.0277171	0.00014526	0.00014893			18.5	0.0445629	0.0144072	3.0518e-05	6.1035e-05			18.5	0.00442142	0.470815			18.5	0.000549	0.000614			18.5	0.0260179	0.0997039	0.0305383			18.5	0.0349823	-0.0108842				18.5	0.0622223	0.0148466	0.0132111				18.5	0.0279604	0.035394
			18.6	0.015665	0.0294289	0.00014526	0.00014893			18.6	0.0445629	0.0144072	3.0518e-05	5.9814e-05			18.6	0.00353685	0.376622			18.6	0.000548	0.000614			18.6	0.0319581	0.0898595	0.0305383			18.6	0.0335888	-0.0130352				18.6	0.0648201	0.0148466	0.0146496				18.6	0.0253296	0.0337645
			18.7	0.015665	0.0294289	0.00014526	0.00014893			18.7	0.0432284	0.0102481	3.0518e-05	6.1035e-05			18.7	0.00353685	0.376622			18.7	0.000548	0.000614			18.7	0.028988	0.0800151	0.0323334			18.7	0.0308019	-0.0130352				18.7	0.066119	0.0185295	0.0132111				18.7	0.026645	0.0337645
			18.8	0.0105649	0.0311407	0.00014526	0.00014893			18.8	0.0405593	0.0144072	3.1738e-05	6.2256e-05			18.8	0.00442142	0.470815			18.8	0.000549	0.000614			18.8	0.0200777	0.0800151	0.0323334			18.8	0.0349823	-0.00980865				18.8	0.0648201	0.0148466	0.0175266				18.8	0.0253296	0.0321349
			18.9	0.013965	0.0345642	0.00014648	0.00014893			18.9	0.0392248	0.0185663	3.0518e-05	6.2256e-05			18.9	0.00265229	0.282429			18.9	0.000548	0.000615			18.9	0.0319581	0.0849373	0.0305383			18.9	0.0335888	-0.0130352				18.9	0.066119	0.0185295	0.0117726				18.9	0.0279604	0.0337645
			19	0.015665	0.0311407	0.00014648	0.00014893			19	0.0432284	0.0164868	3.2959e-05	6.3477e-05			19	0.000883152	0.0940424			19	0.000548	0.000615			19	0.0319581	0.0947817	0.026948			19	0.0335888	-0.0162617				19	0.0635212	0.016688	0.0175266				19	0.026645	0.0370236
			19.1	0.013965	0.0379878	0.00014526	0.00014893			19.1	0.0432284	0.0123276	3.1738e-05	6.3477e-05			19.1	-0.00177055	-0.188537			19.1	0.000548	0.000615			19.1	0.028988	0.0997039	0.0287431			19.1	0.0363758	-0.0184127				19.1	0.0635212	0.0148466	0.0132111				19.1	0.0253296	0.0321349
			19.2	0.015665	0.036276	0.00014648	0.00014771			19.2	0.0325521	0.0144072	3.0518e-05	6.2256e-05			19.2	0.00353685	0.376622			19.2	0.000548	0.000615			19.2	0.0230478	0.0997039	0.0323334			19.2	0.0349823	-0.0119597				19.2	0.0648201	0.0148466	0.0160881				19.2	0.0279604	0.0370236
			19.3	0.015665	0.036276	0.00014526	0.00014893			19.3	0.0365557	0.0123276	3.0518e-05	6.2256e-05			19.3	-0.00177055	-0.188537			19.3	0.000549	0.000614			19.3	0.0349281	0.0652486	0.0305383			19.3	0.0280149	-0.0119597				19.3	0.0700157	0.016688	0.0146496				19.3	0.0279604	0.035394
			19.4	0.013965	0.0345642	0.00014648	0.00015015			19.4	0.0378902	0.0164868	3.0518e-05	6.2256e-05			19.4	-0.00265512	-0.28273			19.4	0.000549	0.000615			19.4	0.0319581	0.0603264	0.0305383			19.4	0.0349823	-0.0141107				19.4	0.0700157	0.0148466	0.0146496				19.4	0.0305912	0.0337645
			19.5	0.0173651	0.0328524	0.00014648	0.00014893			19.5	0.0418939	0.0206459	3.0518e-05	6.2256e-05			19.5	-0.00619339	-0.659502			19.5	0.000548	0.000615			19.5	0.0260179	0.0849373	0.0323334			19.5	0.0349823	-0.0108842				19.5	0.0674179	0.0148466	0.0189651				19.5	0.0279604	0.0370236
			19.6	0.0173651	0.0294289	0.00014648	0.00015015			19.6	0.0392248	0.0206459	3.0518e-05	6.3477e-05			19.6	-0.00796252	-0.847889			19.6	0.000547	0.000616			19.6	0.0319581	0.0997039	0.0323334			19.6	0.0363758	-0.0141107				19.6	0.0674179	0.0148466	0.0175266				19.6	0.0319067	0.0337645
			19.7	0.0190652	0.0294289	0.00014526	0.00015015			19.7	0.0378902	0.0268846	3.0518e-05	6.3477e-05			19.7	-0.00707796	-0.753696			19.7	0.000548	0.000614			19.7	0.0319581	0.119393	0.0341286			19.7	0.0419498	-0.0162617				19.7	0.0648201	0.0111637	0.0189651				19.7	0.026645	0.0370236
			19.8	0.0173651	0.0345642	0.00014771	0.00015137			19.8	0.0418939	0.0164868	3.1738e-05	6.3477e-05			19.8	-0.00442425	-0.471116			19.8	0.000549	0.000615			19.8	0.0260179	0.104626	0.0341286			19.8	0.0433433	-0.0173372				19.8	0.0713146	0.016688	0.0175266				19.8	0.0292758	0.0386532
			19.9	0.015665	0.0345642	0.00014771	0.00015137			19.9	0.0418939	0.0102481	3.1738e-05	6.3477e-05			19.9	-0.00177055	-0.188537			19.9	0.000548	0.000615			19.9	0.0319581	0.0947817	0.0359237			19.9	0.0349823	-0.0130352				19.9	0.0713146	0.016688	0.0189651				19.9	0.0305912	0.035394
			20	0.0173651	0.036276	0.00014648	0.00015015			20	0.0418939	0.0144072	3.1738e-05	6.3477e-05			20	-0.00265512	-0.28273			20	0.000549	0.000614			20	0.0408683	0.0800151	0.0377189			20	0.0349823	-0.0130352				20	0.0713146	0.016688	0.0204036				20	0.0305912	0.0402827
			20.1	0.0173651	0.0345642	0.00014526	0.00014893			20.1	0.0378902	0.0164868	3.1738e-05	6.3477e-05			20.1	-0.00619339	-0.659502			20.1	0.000549	0.000614			20.1	0.0319581	0.0898595	0.0359237			20.1	0.0349823	-0.0151862				20.1	0.0700157	0.0130051	0.0204036				20.1	0.0332221	0.0370236
			20.2	0.0190652	0.0328524	0.00014526	0.00015015			20.2	0.0378902	0.0123276	3.0518e-05	6.3477e-05			20.2	-0.00530882	-0.565309			20.2	0.000549	0.000615			20.2	0.0230478	0.0997039	0.0341286			20.2	0.0363758	-0.0141107				20.2	0.0713146	0.0185295	0.0204036				20.2	0.0292758	0.035394
			20.3	0.0224653	0.036276	0.00014648	0.00014893			20.3	0.0405593	0.0164868	3.0518e-05	6.3477e-05			20.3	-0.00442425	-0.471116			20.3	0.000549	0.000615			20.3	0.0349281	0.129237	0.0323334			20.3	0.0419498	-0.0108842				20.3	0.0700157	0.0148466	0.0189651				20.3	0.0319067	0.0402827
			20.4	0.0207652	0.036276	0.00014771	0.00015015			20.4	0.0418939	0.0206459	3.1738e-05	6.4697e-05			20.4	-0.00442425	-0.471116			20.4	0.000549	0.000614			20.4	0.0349281	0.144004	0.0305383			20.4	0.0419498	-0.0162617				20.4	0.0713146	0.0185295	0.024719				20.4	0.026645	0.0386532
			20.5	0.0224653	0.0414113	0.00014648	0.00014893			20.5	0.0378902	0.0185663	3.1738e-05	6.3477e-05			20.5	-0.00353969	-0.376923			20.5	0.000548	0.000615			20.5	0.0260179	0.129237	0.0287431			20.5	0.0391628	-0.0151862				20.5	0.0739124	0.016688	0.0204036				20.5	0.0319067	0.0402827
			20.6	0.0207652	0.0396996	0.00014771	0.00015015			20.6	0.0365557	0.0206459	3.0518e-05	6.3477e-05			20.6	-0.00265512	-0.28273			20.6	0.000548	0.000613			20.6	0.0349281	0.109548	0.0323334			20.6	0.0252279	-0.0151862				20.6	0.0739124	0.0185295	0.021842				20.6	0.0305912	0.0402827
			20.7	0.0224653	0.0431231	0.00014648	0.00015015			20.7	0.0378902	0.0227255	3.1738e-05	6.3477e-05			20.7	-0.00530882	-0.565309			20.7	0.000549	0.000614			20.7	0.0408683	0.0898595	0.0341286			20.7	0.0308019	-0.0173372				20.7	0.0765102	0.0185295	0.0204036				20.7	0.0305912	0.0370236
			20.8	0.0275655	0.0414113	0.00014771	0.00015015			20.8	0.0418939	0.024805	3.2959e-05	6.3477e-05			20.8	-0.00530882	-0.565309			20.8	0.000549	0.000615			20.8	0.028988	0.0947817	0.0359237			20.8	0.0349823	-0.0141107				20.8	0.0778091	0.0185295	0.0204036				20.8	0.0319067	0.0451714
			20.9	0.0258654	0.0414113	0.00014771	0.00015015			20.9	0.0352212	0.0268846	3.2959e-05	6.3477e-05			20.9	-0.00530882	-0.565309			20.9	0.000549	0.000614			20.9	0.028988	0.11447	0.0359237			20.9	0.0363758	-0.0141107				20.9	0.0752113	0.016688	0.021842				20.9	0.0305912	0.0386532
			21	0.0275655	0.0465467	0.00014893	0.00014893			21	0.0378902	0.024805	3.2959e-05	6.4697e-05			21	-0.00707796	-0.753696			21	0.000551	0.000614			21	0.0438384	0.11447	0.0377189			21	0.0377693	-0.0119597				21	0.0778091	0.0148466	0.021842				21	0.0305912	0.0419123
			21.1	0.0241653	0.0431231	0.00014893	0.00015137			21.1	0.0418939	0.0185663	3.2959e-05	6.3477e-05			21.1	-0.00619339	-0.659502			21.1	0.000549	0.000614			21.1	0.0349281	0.139081	0.0359237			21.1	0.0294084	-0.00980865				21.1	0.0804069	0.0185295	0.024719				21.1	0.0279604	0.0451714
			21.2	0.0258654	0.0431231	0.00014893	0.00015137			21.2	0.0432284	0.0185663	3.2959e-05	6.3477e-05			21.2	-0.00707796	-0.753696			21.2	0.000548	0.000613			21.2	0.0319581	0.11447	0.0323334			21.2	0.0308019	-0.00765763				21.2	0.0804069	0.0185295	0.0189651				21.2	0.0319067	0.0419123
			21.3	0.0224653	0.0414113	0.00014771	0.00015015			21.3	0.0392248	0.0164868	3.2959e-05	6.3477e-05			21.3	-0.00884709	-0.942082			21.3	0.000548	0.000613			21.3	0.0349281	0.11447	0.0341286			21.3	0.0280149	-0.00980865				21.3	0.079108	0.0222124	0.024719				21.3	0.0305912	0.0419123
			21.4	0.0258654	0.0379878	0.00014893	0.00015015			21.4	0.0405593	0.0185663	3.2959e-05	6.3477e-05			21.4	-0.00884709	-0.942082			21.4	0.000549	0.000614			21.4	0.0378982	0.119393	0.0323334			21.4	0.0294084	-0.0130352				21.4	0.0778091	0.020371	0.021842				21.4	0.0292758	0.0435418
			21.5	0.0241653	0.0379878	0.00014771	0.00015015			21.5	0.0392248	0.0164868	3.2959e-05	6.4697e-05			21.5	-0.00973166	-1.03627			21.5	0.000549	0.000613			21.5	0.0319581	0.104626	0.0341286			21.5	0.0335888	-0.0141107				21.5	0.0804069	0.0222124	0.021842				21.5	0.0319067	0.0419123
			21.6	0.0224653	0.0414113	0.00015015	0.00015137			21.6	0.0432284	0.0185663	3.418e-05	6.4697e-05			21.6	-0.00707796	-0.753696			21.6	0.000551	0.000613			21.6	0.028988	0.0997039	0.0359237			21.6	0.0349823	-0.0173372				21.6	0.0830047	0.016688	0.0232805				21.6	0.0279604	0.0435418
			21.7	0.0224653	0.0431231	0.00015015	0.00015015			21.7	0.0392248	0.0206459	3.2959e-05	6.5918e-05			21.7	-0.00442425	-0.471116			21.7	0.000551	0.000614			21.7	0.0438384	0.11447	0.039514			21.7	0.0433433	-0.0130352				21.7	0.079108	0.0222124	0.0189651				21.7	0.0332221	0.0419123
			21.8	0.0224653	0.0448349	0.00014893	0.00014893			21.8	0.0365557	0.0310437	3.418e-05	6.4697e-05			21.8	-0.00619339	-0.659502			21.8	0.000552	0.000613			21.8	0.0408683	0.148926	0.0377189			21.8	0.0419498	-0.0130352				21.8	0.079108	0.0185295	0.024719				21.8	0.0319067	0.046801
			21.9	0.0190652	0.0448349	0.00014893	0.00014771			21.9	0.0392248	0.0268846	3.418e-05	6.4697e-05			21.9	-0.00619339	-0.659502			21.9	0.000551	0.000614			21.9	0.0319581	0.153848	0.039514			21.9	0.0489173	-0.0119597				21.9	0.0817058	0.0222124	0.0189651				21.9	0.0371683	0.046801
			22	0.0190652	0.0448349	0.00014893	0.00015015			22	0.0418939	0.0310437	3.2959e-05	6.3477e-05			22	-0.00796252	-0.847889			22	0.000552	0.000615			22	0.0438384	0.124315	0.0431043			22	0.0419498	-0.00980865				22	0.0804069	0.020371	0.0232805				22	0.0332221	0.0419123
			22.1	0.0190652	0.0465467	0.00015137	0.00015015			22.1	0.0445629	0.0310437	3.2959e-05	6.3477e-05			22.1	-0.0106162	-1.13047			22.1	0.000552	0.000614			22.1	0.0378982	0.119393	0.0448995			22.1	0.0419498	-0.0108842				22.1	0.0817058	0.0185295	0.0189651				22.1	0.0345375	0.046801
			22.2	0.0190652	0.051682	0.00015015	0.00015015			22.2	0.0418939	0.0331233	3.418e-05	6.4697e-05			22.2	-0.00973166	-1.03627			22.2	0.000551	0.000613			22.2	0.0378982	0.0898595	0.0431043			22.2	0.0419498	-0.0130352				22.2	0.079108	0.020371	0.021842				22.2	0.0345375	0.046801
			22.3	0.0173651	0.0499702	0.00014893	0.00015015			22.3	0.0458975	0.0268846	3.2959e-05	6.4697e-05			22.3	-0.00707796	-0.753696			22.3	0.000551	0.000613			22.3	0.0408683	0.0997039	0.0359237			22.3	0.0419498	-0.0162617				22.3	0.0765102	0.020371	0.0232805				22.3	0.0319067	0.0451714
			22.4	0.015665	0.0499702	0.00015015	0.00015015			22.4	0.0458975	0.0268846	3.2959e-05	6.4697e-05			22.4	-0.00796252	-0.847889			22.4	0.000549	0.000614			22.4	0.0438384	0.129237	0.0359237			22.4	0.0377693	-0.0184127				22.4	0.0778091	0.0222124	0.021842				22.4	0.0358529	0.0484305
			22.5	0.015665	0.0482584	0.00015015	0.00015015			22.5	0.047232	0.0289641	3.1738e-05	6.4697e-05			22.5	-0.0106162	-1.13047			22.5	0.000551	0.000615			22.5	0.0319581	0.139081	0.039514			22.5	0.0419498	-0.0173372				22.5	0.079108	0.016688	0.024719				22.5	0.0345375	0.0435418
			22.6	0.0190652	0.0465467	0.00015137	0.00015137			22.6	0.0445629	0.0289641	3.2959e-05	6.4697e-05			22.6	-0.00973166	-1.03627			22.6	0.000551	0.000615			22.6	0.0349281	0.134159	0.0377189			22.6	0.0461303	-0.0184127				22.6	0.079108	0.0240539	0.021842				22.6	0.0358529	0.046801
			22.7	0.0241653	0.0448349	0.00015015	0.00015137			22.7	0.0445629	0.0268846	3.418e-05	6.3477e-05			22.7	-0.0115008	-1.22466			22.7	0.000549	0.000616			22.7	0.0378982	0.129237	0.0413092			22.7	0.0461303	-0.0151862				22.7	0.0804069	0.0185295	0.0261575				22.7	0.0371683	0.0516896
			22.8	0.0224653	0.0448349	0.00015137	0.00015137			22.8	0.0485666	0.0289641	3.1738e-05	6.4697e-05			22.8	-0.00973166	-1.03627			22.8	0.000549	0.000614			22.8	0.0408683	0.119393	0.0377189			22.8	0.0461303	-0.0184127				22.8	0.0804069	0.0240539	0.027596				22.8	0.0345375	0.046801
			22.9	0.0241653	0.0448349	0.00015137	0.00015015			22.9	0.047232	0.0268846	3.2959e-05	6.4697e-05			22.9	-0.0115008	-1.22466			22.9	0.000551	0.000615			22.9	0.0438384	0.0997039	0.0413092			22.9	0.0475238	-0.0216392				22.9	0.079108	0.0222124	0.0290345				22.9	0.0358529	0.0500601
			23	0.0258654	0.0465467	0.00015137	0.00015015			23	0.0445629	0.0352028	3.2959e-05	6.4697e-05			23	-0.0123854	-1.31885			23	0.000551	0.000615			23	0.0438384	0.119393	0.0377189			23	0.0461303	-0.0194882				23	0.0804069	0.0258953	0.030473				23	0.0345375	0.0484305
			23.1	0.0190652	0.0448349	0.00015015	0.00015015			23.1	0.0405593	0.039362	3.2959e-05	6.3477e-05			23.1	-0.0132699	-1.41305			23.1	0.000552	0.000615			23.1	0.0468085	0.144004	0.0448995			23.1	0.0391628	-0.0173372				23.1	0.0830047	0.0240539	0.027596				23.1	0.0371683	0.0451714
			23.2	0.0224653	0.0482584	0.00015137	0.00015015			23.2	0.0525702	0.0435211	3.418e-05	6.3477e-05			23.2	-0.00973166	-1.03627			23.2	0.000551	0.000615			23.2	0.0438384	0.129237	0.0448995			23.2	0.0475238	-0.0173372				23.2	0.079108	0.0258953	0.0290345				23.2	0.0371683	0.0500601
			23.3	0.0207652	0.0431231	0.00015259	0.00015137			23.3	0.0552393	0.039362	3.2959e-05	6.3477e-05			23.3	-0.0115008	-1.22466			23.3	0.000552	0.000615			23.3	0.0378982	0.119393	0.0448995			23.3	0.0489173	-0.0162617				23.3	0.0817058	0.0240539	0.0261575				23.3	0.0384837	0.046801
			23.4	0.0207652	0.0482584	0.00015137	0.00015015			23.4	0.0539047	0.0372824	3.6621e-05	6.4697e-05			23.4	-0.00707796	-0.753696			23.4	0.000551	0.000615			23.4	0.0438384	0.119393	0.0431043			23.4	0.0447368	-0.0130352				23.4	0.0817058	0.0240539	0.027596				23.4	0.0384837	0.046801
			23.5	0.0275655	0.0499702	0.00015137	0.00015015			23.5	0.0579083	0.0310437	4.0283e-05	6.5918e-05			23.5	-0.00796252	-0.847889			23.5	0.000552	0.000616			23.5	0.0468085	0.11447	0.039514			23.5	0.0475238	-0.0130352				23.5	0.0817058	0.0222124	0.030473				23.5	0.0358529	0.0500601
			23.6	0.0292655	0.0499702	0.00015137	0.00014893			23.6	0.0565738	0.0289641	4.0283e-05	6.4697e-05			23.6	-0.00884709	-0.942082			23.6	0.000552	0.000618			23.6	0.0408683	0.139081	0.039514			23.6	0.0475238	-0.0151862				23.6	0.0843036	0.0277368	0.027596				23.6	0.0397991	0.0484305
			23.7	0.0275655	0.0568173	0.00015137	0.00015259			23.7	0.0592429	0.0372824	3.9063e-05	6.5918e-05			23.7	-0.0106162	-1.13047			23.7	0.000552	0.000615			23.7	0.0408683	0.148926	0.039514			23.7	0.0475238	-0.0151862				23.7	0.0817058	0.0240539	0.030473				23.7	0.0358529	0.0516896
			23.8	0.0258654	0.0568173	0.00015137	0.00015137			23.8	0.0592429	0.039362	3.9063e-05	6.5918e-05			23.8	-0.00973166	-1.03627			23.8	0.000553	0.000616			23.8	0.0468085	0.124315	0.0413092			23.8	0.0489173	-0.0141107				23.8	0.0843036	0.0277368	0.027596				23.8	0.0411145	0.0484305
			23.9	0.0275655	0.0499702	0.00015137	0.00015137			23.9	0.0632465	0.0352028	4.0283e-05	6.5918e-05			23.9	-0.00796252	-0.847889			23.9	0.000553	0.000618			23.9	0.0408683	0.119393	0.0431043			23.9	0.0517043	-0.00873314				23.9	0.0856025	0.0240539	0.0290345				23.9	0.0384837	0.0451714
			24	0.0275655	0.0533938	0.00015259	0.00015015			24	0.0659156	0.0331233	3.54e-05	6.7139e-05			24	-0.00796252	-0.847889			24	0.000553	0.000615			24	0.0378982	0.119393	0.0431043			24	0.0558848	-0.0141107				24	0.0830047	0.0240539	0.03335				24	0.0397991	0.0500601
			24.1	0.0292655	0.0482584	0.00015137	0.00015259			24.1	0.0579083	0.0289641	3.418e-05	6.5918e-05			24.1	-0.00796252	-0.847889			24.1	0.000553	0.000615			24.1	0.0438384	0.124315	0.0448995			24.1	0.0558848	-0.0151862				24.1	0.0869014	0.0240539	0.0319115				24.1	0.0371683	0.0500601
			24.2	0.0275655	0.0499702	0.00015259	0.00015137			24.2	0.0512356	0.0289641	3.418e-05	6.4697e-05			24.2	-0.0115008	-1.22466			24.2	0.000554	0.000616			24.2	0.0557187	0.134159	0.0502849			24.2	0.0489173	-0.0130352				24.2	0.0869014	0.0277368	0.03335				24.2	0.0397991	0.0500601
			24.3	0.0241653	0.0482584	0.00015259	0.00015259			24.3	0.0525702	0.0331233	3.2959e-05	6.4697e-05			24.3	-0.00884709	-0.942082			24.3	0.000553	0.000618			24.3	0.0468085	0.153848	0.0448995			24.3	0.0489173	-0.0119597				24.3	0.0882003	0.0258953	0.0319115				24.3	0.0411145	0.0549488
			24.4	0.0224653	0.0499702	0.00015259	0.00015137			24.4	0.0552393	0.0331233	3.418e-05	6.7139e-05			24.4	-0.00796252	-0.847889			24.4	0.000552	0.000616			24.4	0.0438384	0.134159	0.0431043			24.4	0.0530978	-0.0130352				24.4	0.0882003	0.0240539	0.0362269				24.4	0.0371683	0.046801
			24.5	0.0258654	0.0465467	0.00015137	0.00015259			24.5	0.0565738	0.0352028	3.2959e-05	6.7139e-05			24.5	-0.0106162	-1.13047			24.5	0.000552	0.000618			24.5	0.0497786	0.129237	0.0431043			24.5	0.0558848	-0.0141107				24.5	0.0843036	0.0277368	0.0319115				24.5	0.0411145	0.0516896
			24.6	0.0207652	0.0499702	0.00015259	0.00015137			24.6	0.064581	0.0372824	3.418e-05	6.5918e-05			24.6	-0.00619339	-0.659502			24.6	0.000553	0.000616			24.6	0.0468085	0.104626	0.0413092			24.6	0.0530978	-0.0194882				24.6	0.0817058	0.0240539	0.0347885				24.6	0.0384837	0.0533192
			24.7	0.0241653	0.051682	0.00015381	0.00015259			24.7	0.0605774	0.0372824	3.54e-05	6.5918e-05			24.7	-0.00796252	-0.847889			24.7	0.000553	0.000615			24.7	0.0468085	0.109548	0.0431043			24.7	0.0503108	-0.0205637				24.7	0.0856025	0.0258953	0.0347885				24.7	0.0358529	0.0500601
			24.8	0.0258654	0.051682	0.00015259	0.00015259			24.8	0.0552393	0.0352028	3.54e-05	6.5918e-05			24.8	-0.00884709	-0.942082			24.8	0.000551	0.000616			24.8	0.0468085	0.144004	0.0466946			24.8	0.0475238	-0.0237903				24.8	0.0882003	0.0295782	0.03335				24.8	0.0411145	0.0549488
			24.9	0.0224653	0.0533938	0.00015259	0.00015259			24.9	0.0592429	0.0414415	3.54e-05	6.7139e-05			24.9	-0.00707796	-0.753696			24.9	0.000552	0.000618			24.9	0.0527486	0.153848	0.0466946			24.9	0.0503108	-0.0205637				24.9	0.0869014	0.0295782	0.0347885				24.9	0.0397991	0.0549488
			25	0.0275655	0.0568173	0.00015259	0.00015137			25	0.0592429	0.0435211	3.418e-05	6.7139e-05			25	-0.00707796	-0.753696			25	0.000552	0.000616			25	0.0468085	0.124315	0.0484898			25	0.0447368	-0.0194882				25	0.0869014	0.0295782	0.03335				25	0.0411145	0.0516896
			25.1	0.0258654	0.0551056	0.00015381	0.00015137			25.1	0.0592429	0.0414415	3.418e-05	6.5918e-05			25.1	-0.00619339	-0.659502			25.1	0.000552	0.000618			25.1	0.0497786	0.124315	0.0538752			25.1	0.0461303	-0.0151862				25.1	0.092097	0.0314197	0.0347885				25.1	0.0397991	0.0549488
			25.2	0.0241653	0.0551056	0.00015381	0.00015137			25.2	0.0565738	0.0414415	3.418e-05	6.7139e-05			25.2	-0.00884709	-0.942082			25.2	0.000552	0.000619			25.2	0.0527486	0.119393	0.0520801			25.2	0.0489173	-0.0184127				25.2	0.0869014	0.0258953	0.030473				25.2	0.04243	0.0565783
			25.3	0.0241653	0.0551056	0.00015259	0.00015137			25.3	0.0579083	0.039362	3.54e-05	6.7139e-05			25.3	-0.00796252	-0.847889			25.3	0.000552	0.000616			25.3	0.0586888	0.129237	0.0484898			25.3	0.0503108	-0.0205637				25.3	0.0869014	0.0277368	0.030473				25.3	0.0397991	0.0549488
			25.4	0.0241653	0.0568173	0.00015137	0.00015137			25.4	0.0579083	0.0331233	3.54e-05	6.7139e-05			25.4	-0.00884709	-0.942082			25.4	0.000551	0.000619			25.4	0.0527486	0.129237	0.0484898			25.4	0.0419498	-0.0237903				25.4	0.0882003	0.0277368	0.0319115				25.4	0.0411145	0.0598374
			25.5	0.0241653	0.051682	0.00015381	0.00015381			25.5	0.0592429	0.039362	3.54e-05	6.7139e-05			25.5	-0.00707796	-0.753696			25.5	0.000552	0.000616			25.5	0.0497786	0.163692	0.0448995			25.5	0.0419498	-0.0216392				25.5	0.0869014	0.0314197	0.0319115				25.5	0.04243	0.0549488
			25.6	0.0241653	0.0482584	0.00015259	0.00015259			25.6	0.0525702	0.0352028	3.54e-05	6.7139e-05			25.6	-0.00707796	-0.753696			25.6	0.000552	0.000618			25.6	0.0557187	0.148926	0.0448995			25.6	0.0377693	-0.0184127				25.6	0.0894992	0.0295782	0.0347885				25.6	0.0437454	0.0565783
			25.7	0.0258654	0.0499702	0.00015259	0.00015381			25.7	0.0525702	0.0372824	3.418e-05	6.7139e-05			25.7	-0.00530882	-0.565309			25.7	0.000553	0.000616			25.7	0.0557187	0.134159	0.0448995			25.7	0.0377693	-0.0184127				25.7	0.0907981	0.0314197	0.0290345				25.7	0.0411145	0.0598374
			25.8	0.0224653	0.0482584	0.00015259	0.00015503			25.8	0.0525702	0.0414415	3.6621e-05	6.7139e-05			25.8	-0.00884709	-0.942082			25.8	0.000552	0.000616			25.8	0.0468085	0.124315	0.0466946			25.8	0.0433433	-0.0141107				25.8	0.0869014	0.0277368	0.0319115				25.8	0.04243	0.0582079
			25.9	0.0241653	0.0499702	0.00015381	0.00015381			25.9	0.0539047	0.0435211	3.54e-05	6.7139e-05			25.9	-0.00973166	-1.03627			25.9	0.000552	0.000616			25.9	0.0497786	0.134159	0.0502849			25.9	0.0461303	-0.0141107				25.9	0.0894992	0.0277368	0.0319115				25.9	0.0411145	0.0549488
			26	0.0275655	0.0533938	0.00015259	0.00015503			26	0.0539047	0.0372824	3.6621e-05	6.8359e-05			26	-0.00884709	-0.942082			26	0.000552	0.000618			26	0.0527486	0.134159	0.0502849			26	0.0475238	-0.0205637				26	0.0907981	0.0258953	0.030473				26	0.0384837	0.0598374
			26.1	0.0258654	0.0533938	0.00015381	0.00015503			26.1	0.0525702	0.0372824	3.6621e-05	6.8359e-05			26.1	-0.00796252	-0.847889			26.1	0.000552	0.000618			26.1	0.0468085	0.15877	0.0502849			26.1	0.0419498	-0.0227148				26.1	0.0946948	0.0314197	0.03335				26.1	0.0411145	0.0582079
			26.2	0.0241653	0.0533938	0.00015259	0.00015503			26.2	0.0565738	0.0352028	3.54e-05	6.7139e-05			26.2	-0.00442425	-0.471116			26.2	0.000551	0.000616			26.2	0.0497786	0.148926	0.0538752			26.2	0.0405563	-0.0237903				26.2	0.0933959	0.0332612	0.03335				26.2	0.0411145	0.0582079
			26.3	0.0258654	0.0551056	0.00015381	0.00015381			26.3	0.0699192	0.0352028	3.7842e-05	6.7139e-05			26.3	-0.00707796	-0.753696			26.3	0.000552	0.000616			26.3	0.0557187	0.124315	0.0520801			26.3	0.0391628	-0.0205637				26.3	0.0946948	0.0332612	0.0347885				26.3	0.04243	0.0598374
			26.4	0.0241653	0.0568173	0.00015381	0.00015503			26.4	0.0672501	0.039362	3.6621e-05	6.5918e-05			26.4	-0.00796252	-0.847889			26.4	0.000552	0.000616			26.4	0.0557187	0.134159	0.0538752			26.4	0.0405563	-0.0216392				26.4	0.092097	0.0332612	0.030473				26.4	0.0384837	0.0582079
			26.5	0.0258654	0.0619527	0.00015381	0.00015503			26.5	0.0659156	0.0372824	3.6621e-05	6.7139e-05			26.5	-0.00619339	-0.659502			26.5	0.000552	0.000616			26.5	0.0408683	0.124315	0.0538752			26.5	0.0391628	-0.0194882				26.5	0.0882003	0.0314197	0.0376654				26.5	0.0411145	0.0582079
			26.6	0.0275655	0.0619527	0.00015381	0.00015381			26.6	0.0605774	0.0372824	3.7842e-05	6.958e-05			26.6	-0.00530882	-0.565309			26.6	0.000552	0.000616			26.6	0.0557187	0.148926	0.0484898			26.6	0.0461303	-0.0162617				26.6	0.0882003	0.0332612	0.0391039				26.6	0.0437454	0.0598374
			26.7	0.0258654	0.0636644	0.00015503	0.00015381			26.7	0.0632465	0.0352028	3.6621e-05	6.8359e-05			26.7	-0.00442425	-0.471116			26.7	0.000551	0.000616			26.7	0.0586888	0.173537	0.0484898			26.7	0.0517043	-0.0173372				26.7	0.0882003	0.0295782	0.0347885				26.7	0.0437454	0.0582079
			26.8	0.0292655	0.0568173	0.00015503	0.00015381			26.8	0.064581	0.0331233	3.6621e-05	6.7139e-05			26.8	-0.00353969	-0.376923			26.8	0.000552	0.000615			26.8	0.0527486	0.148926	0.0520801			26.8	0.0433433	-0.0184127				26.8	0.0894992	0.0332612	0.0391039				26.8	0.0476916	0.061467
			26.9	0.0292655	0.0585291	0.00015503	0.00015503			26.9	0.0659156	0.0331233	3.6621e-05	6.8359e-05			26.9	-0.00442425	-0.471116			26.9	0.000553	0.000618			26.9	0.0438384	0.134159	0.0502849			26.9	0.0433433	-0.0184127				26.9	0.0933959	0.0332612	0.03335				26.9	0.0463762	0.0565783
			27	0.0326656	0.0568173	0.00015381	0.00015503			27	0.0619119	0.0289641	3.7842e-05	6.8359e-05			27	-0.00707796	-0.753696			27	0.000553	0.000618			27	0.0497786	0.129237	0.0502849			27	0.0419498	-0.0173372				27	0.092097	0.0351026	0.03335				27	0.0476916	0.0598374
			27.1	0.0326656	0.0551056	0.00015503	0.00015381			27.1	0.0565738	0.0268846	3.6621e-05	6.8359e-05			27.1	-0.00796252	-0.847889			27.1	0.000551	0.000618			27.1	0.0408683	0.134159	0.0538752			27.1	0.0447368	-0.0184127				27.1	0.0907981	0.0332612	0.0319115				27.1	0.0450608	0.061467
			27.2	0.0360658	0.0568173	0.00015503	0.00015381			27.2	0.0565738	0.0227255	3.54e-05	6.8359e-05			27.2	-0.00619339	-0.659502			27.2	0.000551	0.000618			27.2	0.0349281	0.148926	0.0538752			27.2	0.0433433	-0.0184127				27.2	0.092097	0.0387855	0.0347885				27.2	0.0437454	0.0598374
			27.3	0.0360658	0.0568173	0.00015381	0.00015503			27.3	0.0619119	0.0227255	3.6621e-05	6.7139e-05			27.3	-0.00353969	-0.376923			27.3	0.000552	0.000616			27.3	0.0527486	0.15877	0.0520801			27.3	0.0489173	-0.0205637				27.3	0.092097	0.0351026	0.03335				27.3	0.0463762	0.061467
			27.4	0.0292655	0.0568173	0.00015503	0.00015381			27.4	0.0565738	0.0268846	3.6621e-05	6.7139e-05			27.4	-0.00353969	-0.376923			27.4	0.000553	0.000618			27.4	0.0468085	0.129237	0.0538752			27.4	0.0475238	-0.0151862				27.4	0.0907981	0.0369441	0.03335				27.4	0.0437454	0.0630965
			27.5	0.0360658	0.0568173	0.00015381	0.00015381			27.5	0.0565738	0.0268846	3.6621e-05	6.5918e-05			27.5	-0.00619339	-0.659502			27.5	0.000552	0.000618			27.5	0.0468085	0.129237	0.0502849			27.5	0.0433433	-0.0119597				27.5	0.092097	0.0332612	0.0376654				27.5	0.0463762	0.0582079
			27.6	0.0326656	0.0568173	0.00015381	0.00015381			27.6	0.0565738	0.0289641	3.54e-05	6.7139e-05			27.6	-0.00796252	-0.847889			27.6	0.000552	0.000615			27.6	0.0497786	0.124315	0.0520801			27.6	0.0447368	-0.00873314				27.6	0.0894992	0.0387855	0.0319115				27.6	0.0437454	0.0663557
			27.7	0.0360658	0.0568173	0.00015381	0.00015381			27.7	0.0632465	0.0289641	3.54e-05	6.7139e-05			27.7	-0.00619339	-0.659502			27.7	0.000552	0.000616			27.7	0.0527486	0.129237	0.0520801			27.7	0.0419498	-0.0130352				27.7	0.0894992	0.0332612	0.0376654				27.7	0.0450608	0.0663557
			27.8	0.0326656	0.0602409	0.00015503	0.00015503			27.8	0.064581	0.0310437	3.54e-05	6.8359e-05			27.8	-0.00442425	-0.471116			27.8	0.000552	0.000618			27.8	0.0497786	0.148926	0.0502849			27.8	0.0447368	-0.0151862				27.8	0.0907981	0.0369441	0.0362269				27.8	0.0450608	0.061467
			27.9	0.0309656	0.0619527	0.00015625	0.00015503			27.9	0.0579083	0.0289641	3.6621e-05	6.7139e-05			27.9	-0.000885983	-0.0943438			27.9	0.000552	0.000616			27.9	0.0497786	0.139081	0.0538752			27.9	0.0461303	-0.0119597				27.9	0.0933959	0.0369441	0.0347885				27.9	0.0463762	0.0663557
			28	0.0292655	0.0602409	0.00015381	0.00015259			28	0.0579083	0.0310437	3.6621e-05	6.958e-05			28	-0.00353969	-0.376923			28	0.000553	0.000616			28	0.0557187	0.129237	0.0538752			28	0.0503108	-0.0119597				28	0.0933959	0.040627	0.0376654				28	0.049007	0.0647261
			28.1	0.0292655	0.0602409	0.00015503	0.00015381			28.1	0.0579083	0.0268846	3.6621e-05	6.8359e-05			28.1	-0.00442425	-0.471116			28.1	0.000552	0.000615			28.1	0.0557187	0.124315	0.0502849			28.1	0.0489173	-0.0119597				28.1	0.0946948	0.0387855	0.0362269				28.1	0.0463762	0.0598374
			28.2	0.0309656	0.0619527	0.00015503	0.00015381			28.2	0.0659156	0.0227255	3.418e-05	6.8359e-05			28.2	-0.00442425	-0.471116			28.2	0.000553	0.000616			28.2	0.0468085	0.124315	0.0538752			28.2	0.0475238	-0.0130352				28.2	0.0946948	0.040627	0.0362269				28.2	0.0476916	0.0696148
			28.3	0.0309656	0.0619527	0.00015503	0.00015503			28.3	0.0685846	0.0289641	3.54e-05	7.0801e-05			28.3	-0.00265512	-0.28273			28.3	0.000553	0.000616			28.3	0.0468085	0.129237	0.0538752			28.3	0.0475238	-0.0108842				28.3	0.092097	0.0332612	0.03335				28.3	0.0476916	0.0630965
			28.4	0.0292655	0.067088	0.00015381	0.00015381			28.4	0.064581	0.024805	3.6621e-05	7.0801e-05			28.4	-0.00353969	-0.376923			28.4	0.000552	0.000615			28.4	0.0557187	0.153848	0.0556704			28.4	0.0475238	-0.00658212				28.4	0.0946948	0.040627	0.0376654				28.4	0.0450608	0.0647261
			28.5	0.0292655	0.067088	0.00015503	0.00015381			28.5	0.064581	0.0310437	3.54e-05	6.8359e-05			28.5	-0.00265512	-0.28273			28.5	0.000553	0.000616			28.5	0.0497786	0.153848	0.0610558			28.5	0.0517043	0.0170791				28.5	0.0972926	0.0387855	0.0362269				28.5	0.0476916	0.0696148
			28.6	0.0326656	0.0653762	0.00015625	0.00015503			28.6	0.0605774	0.0352028	3.54e-05	6.8359e-05			28.6	-0.00530882	-0.565309			28.6	0.000553	0.000616			28.6	0.0497786	0.163692	0.0592607			28.6	0.0503108	0.0203056				28.6	0.0972926	0.0443099	0.0376654				28.6	0.049007	0.0647261
			28.7	0.0309656	0.0602409	0.00015503	0.00015503			28.7	0.0619119	0.039362	3.54e-05	6.8359e-05			28.7	-0.00530882	-0.565309			28.7	0.000553	0.000618			28.7	0.0557187	0.134159	0.0610558			28.7	0.0517043	0.0127771				28.7	0.0972926	0.0369441	0.0391039				28.7	0.0516378	0.0630965
			28.8	0.0343657	0.0585291	0.00015503	0.00015503			28.8	0.0632465	0.0331233	3.54e-05	6.8359e-05			28.8	-0.00707796	-0.753696			28.8	0.000552	0.000616			28.8	0.0586888	0.148926	0.0610558			28.8	0.0503108	0.0073995				28.8	0.0959937	0.040627	0.0347885				28.8	0.0503224	0.0679852
			28.9	0.0326656	0.0568173	0.00015381	0.00015503			28.9	0.0632465	0.039362	3.6621e-05	6.8359e-05			28.9	-0.0123854	-1.31885			28.9	0.000553	0.000616			28.9	0.0497786	0.153848	0.0574655			28.9	0.0461303	0.00202196				28.9	0.0946948	0.0369441	0.0376654				28.9	0.0516378	0.0663557
			29	0.0343657	0.0602409	0.00015503	0.00015503			29	0.0619119	0.0414415	3.6621e-05	6.958e-05			29	-0.00442425	-0.471116			29	0.000554	0.000616			29	0.0527486	0.153848	0.0592607			29	0.0433433	-0.00550661				29	0.0946948	0.040627	0.0362269				29	0.049007	0.0696148
			29.1	0.0326656	0.0619527	0.00015503	0.00015625			29.1	0.0672501	0.0414415	3.6621e-05	6.8359e-05			29.1	-0.00442425	-0.471116			29.1	0.000553	0.000616			29.1	0.0527486	0.168615	0.0556704			29.1	0.0475238	-0.00550661				29.1	0.0946948	0.040627	0.0362269				29.1	0.0503224	0.0679852
			29.2	0.0326656	0.0619527	0.00015503	0.00015503			29.2	0.0659156	0.0456006	3.6621e-05	6.958e-05			29.2	-0.00619339	-0.659502			29.2	0.000554	0.000618			29.2	0.0468085	0.173537	0.0538752			29.2	0.0489173	-0.00873314				29.2	0.0959937	0.0443099	0.0376654				29.2	0.0542687	0.0679852
			29.3	0.0326656	0.0636644	0.00015381	0.00015625			29.3	0.0632465	0.0476802	3.6621e-05	6.958e-05			29.3	-0.00442425	-0.471116			29.3	0.000554	0.000615			29.3	0.0468085	0.148926	0.0610558			29.3	0.0544913	-0.0151862				29.3	0.0985915	0.0443099	0.0376654				29.3	0.0516378	0.0696148
			29.4	0.0360658	0.0636644	0.00015503	0.00015503			29.4	0.0659156	0.0476802	3.7842e-05	7.0801e-05			29.4	-0.00619339	-0.659502			29.4	0.000553	0.000616			29.4	0.0616589	0.148926	0.0574655			29.4	0.0517043	-0.0119597				29.4	0.101189	0.040627	0.0391039				29.4	0.0555841	0.0663557
			29.5	0.0343657	0.0585291	0.00015503	0.00015503			29.5	0.0699192	0.0518393	3.6621e-05	6.958e-05			29.5	-0.00353969	-0.376923			29.5	0.000553	0.000616			29.5	0.0557187	0.139081	0.0610558			29.5	0.0517043	-0.0141107				29.5	0.0985915	0.0443099	0.0391039				29.5	0.0555841	0.0696148
			29.6	0.0326656	0.0602409	0.00015503	0.00015625			29.6	0.0699192	0.0476802	3.7842e-05	6.958e-05			29.6	-0.00619339	-0.659502			29.6	0.000554	0.000616			29.6	0.0438384	0.148926	0.0664413			29.6	0.0489173	-0.0119597				29.6	0.0998904	0.040627	0.0419809				29.6	0.0529533	0.0712443
			29.7	0.0309656	0.0619527	0.00015503	0.00015503			29.7	0.0739228	0.0414415	3.7842e-05	7.0801e-05			29.7	-0.00530882	-0.565309			29.7	0.000554	0.000616			29.7	0.0557187	0.173537	0.0646461			29.7	0.0475238	-0.0108842				29.7	0.103787	0.0461514	0.0419809				29.7	0.0542687	0.0679852
			29.8	0.0360658	0.0619527	0.00015503	0.00015625			29.8	0.0699192	0.0456006	3.54e-05	7.0801e-05			29.8	-0.00265512	-0.28273			29.8	0.000554	0.000616			29.8	0.0497786	0.178459	0.0646461			29.8	0.0517043	-0.0108842				29.8	0.103787	0.0443099	0.0434194				29.8	0.0516378	0.0712443
			29.9	0.0343657	0.0619527	0.00015625	0.00015869			29.9	0.0685846	0.0414415	3.7842e-05	6.958e-05			29.9	-0.00177055	-0.188537			29.9	0.000554	0.000618			29.9	0.0408683	0.168615	0.0664413			29.9	0.0572783	-0.0130352				29.9	0.0972926	0.0461514	0.0448579				29.9	0.0542687	0.0712443
			30	0.0377658	0.0636644	0.00015625	0.00015747			30	0.0699192	0.0414415	3.6621e-05	6.958e-05			30	-0.00265512	-0.28273			30	0.000553	0.000618			30	0.0468085	0.144004	0.0592607			30	0.0572783	-0.0141107				30	0.0933959	0.0369441	0.0419809				30	0.0516378	0.0663557
			30.1	0.041166	0.0636644	0.00015503	0.00015747			30.1	0.0699192	0.0414415	3.54e-05	6.958e-05			30.1	-0.000885983	-0.0943438			30.1	0.000554	0.000618			30.1	0.0557187	0.153848	0.0574655			30.1	0.0544913	-0.0162617				30.1	0.0959937	0.0461514	0.0434194				30.1	0.0555841	0.0728739
			30.2	0.0445661	0.0619527	0.00015503	0.00015503			30.2	0.0725883	0.0414415	3.7842e-05	6.958e-05			30.2	-0.00353969	-0.376923			30.2	0.000554	0.000616			30.2	0.0438384	0.168615	0.0610558			30.2	0.0544913	-0.0162617				30.2	0.0959937	0.0369441	0.0434194				30.2	0.0542687	0.0712443
			30.3	0.042866	0.0636644	0.00015625	0.00015625			30.3	0.0725883	0.039362	3.6621e-05	6.958e-05			30.3	-0.00530882	-0.565309			30.3	0.000555	0.000616			30.3	0.0378982	0.178459	0.0574655			30.3	0.0544913	-0.0108842				30.3	0.0972926	0.0443099	0.0448579				30.3	0.0529533	0.0712443
			30.4	0.0445661	0.0653762	0.00015747	0.00015747			30.4	0.0712537	0.0414415	3.7842e-05	6.958e-05			30.4	-0.00442425	-0.471116			30.4	0.000554	0.000616			30.4	0.0497786	0.188303	0.0592607			30.4	0.0558848	-0.00980865				30.4	0.0959937	0.0443099	0.0434194				30.4	0.0542687	0.0745035
			30.5	0.0445661	0.0653762	0.00015625	0.00015625			30.5	0.0659156	0.0414415	3.7842e-05	6.958e-05			30.5	-0.00442425	-0.471116			30.5	0.000555	0.000616			30.5	0.0557187	0.168615	0.0610558			30.5	0.0572783	-0.00765763				30.5	0.092097	0.0479928	0.0434194				30.5	0.0503224	0.0696148
			30.6	0.0445661	0.067088	0.00015625	0.00015625			30.6	0.0672501	0.0414415	3.7842e-05	6.958e-05			30.6	-0.00265512	-0.28273			30.6	0.000554	0.000618			30.6	0.0527486	0.153848	0.0592607			30.6	0.0600653	-0.00980865				30.6	0.0933959	0.040627	0.0419809				30.6	0.0568995	0.0712443
			30.7	0.0445661	0.0653762	0.00015747	0.00015625			30.7	0.0699192	0.0352028	3.9063e-05	6.958e-05			30.7	-0.00353969	-0.376923			30.7	0.000554	0.000619			30.7	0.0527486	0.148926	0.0646461			30.7	0.0558848	-0.0119597				30.7	0.092097	0.0461514	0.0405424				30.7	0.0542687	0.076133
			30.8	0.042866	0.0687998	0.00015747	0.00015625			30.8	0.0779264	0.0372824	3.7842e-05	7.0801e-05			30.8	-0.00442425	-0.471116			30.8	0.000554	0.000616			30.8	0.064629	0.153848	0.0664413			30.8	0.0586718	-0.00873314				30.8	0.0946948	0.040627	0.0434194				30.8	0.0542687	0.0696148
			30.9	0.0445661	0.0653762	0.00015747	0.00015747			30.9	0.0765919	0.0372824	3.9063e-05	7.0801e-05			30.9	-0.00353969	-0.376923			30.9	0.000553	0.000618			30.9	0.0527486	0.178459	0.0682364			30.9	0.0586718	-0.0044311				30.9	0.0959937	0.0461514	0.0419809				30.9	0.0529533	0.0745035
			31	0.042866	0.0636644	0.00015625	0.00015625			31	0.0752573	0.0372824	3.9063e-05	7.0801e-05			31	-0.00530882	-0.565309			31	0.000553	0.000618			31	0.0527486	0.198148	0.0664413			31	0.0614588	-0.00335559				31	0.0972926	0.0424685	0.0462964				31	0.0582149	0.0712443
			31.1	0.041166	0.067088	0.00015625	0.00015503			31.1	0.079261	0.039362	3.9063e-05	6.958e-05			31.1	-0.00265512	-0.28273			31.1	0.000555	0.000618			31.1	0.0586888	0.163692	0.0664413			31.1	0.0642458	-0.00335559				31.1	0.0946948	0.0443099	0.0419809				31.1	0.0529533	0.0712443
			31.2	0.0445661	0.0653762	0.00015625	0.00015625			31.2	0.079261	0.0476802	3.7842e-05	6.958e-05			31.2	-0.000885983	-0.0943438			31.2	0.000552	0.000619			31.2	0.067599	0.144004	0.0646461			31.2	0.0670328	-0.000129061				31.2	0.0972926	0.0424685	0.0462964				31.2	0.0582149	0.076133
			31.3	0.0445661	0.0585291	0.00015747	0.00015747			31.3	0.0725883	0.0497598	3.9063e-05	6.958e-05			31.3	-0.000885983	-0.0943438			31.3	0.000553	0.000616			31.3	0.0616589	0.139081	0.062851			31.3	0.0656393	-0.00335559				31.3	0.0972926	0.0461514	0.0434194				31.3	0.0568995	0.0728739
			31.4	0.041166	0.0619527	0.00015747	0.00015625			31.4	0.0685846	0.0497598	3.7842e-05	7.0801e-05			31.4	-0.00353969	-0.376923			31.4	0.000557	0.000619			31.4	0.0527486	0.183381	0.0664413			31.4	0.0656393	-0.0044311				31.4	0.0946948	0.0424685	0.0434194				31.4	0.0555841	0.0777626
			31.5	0.041166	0.0636644	0.00015747	0.00015625			31.5	0.0685846	0.0456006	3.9063e-05	7.0801e-05			31.5	-0.00177055	-0.188537			31.5	0.000554	0.000618			31.5	0.0557187	0.193225	0.0664413			31.5	0.0628523	-0.00550661				31.5	0.0972926	0.0479928	0.0491734				31.5	0.0542687	0.0777626
			31.6	0.0445661	0.0653762	0.00015869	0.00015625			31.6	0.0685846	0.0435211	3.7842e-05	7.0801e-05			31.6	-0.00177055	-0.188537			31.6	0.000554	0.000618			31.6	0.0586888	0.173537	0.0682364			31.6	0.0656393	-0.00658212				31.6	0.0985915	0.0461514	0.0462964				31.6	0.0555841	0.0777626
			31.7	0.042866	0.0653762	0.00015991	0.00015625			31.7	0.0739228	0.0497598	3.7842e-05	7.0801e-05			31.7	-0.000885983	-0.0943438			31.7	0.000553	0.000616			31.7	0.0616589	0.134159	0.0664413			31.7	0.0656393	-0.00980865				31.7	0.0972926	0.0479928	0.0491734				31.7	0.0595303	0.0810217
			31.8	0.042866	0.0636644	0.00015869	0.00015625			31.8	0.0712537	0.0518393	3.7842e-05	7.0801e-05			31.8	-1.41531e-06	-0.000150709			31.8	0.000554	0.000618			31.8	0.0616589	0.148926	0.0682364			31.8	0.0670328	-0.00765763				31.8	0.0998904	0.0498343	0.0506119				31.8	0.0582149	0.076133
			31.9	0.0394659	0.0653762	0.00015747	0.00015625			31.9	0.0752573	0.0476802	4.0283e-05	7.0801e-05			31.9	-0.00177055	-0.188537			31.9	0.000553	0.000618			31.9	0.067599	0.15877	0.0682364			31.9	0.0684263	-0.00335559				31.9	0.0998904	0.0498343	0.0434194				31.9	0.0568995	0.0793921
			32	0.0394659	0.067088	0.00015625	0.00015503			32	0.0725883	0.0435211	3.9063e-05	7.0801e-05			32	-0.00265512	-0.28273			32	0.000554	0.000616			32	0.0616589	0.188303	0.0736219			32	0.0670328	-0.0044311				32	0.101189	0.0461514	0.0477349				32	0.0595303	0.0826513
			32.1	0.0394659	0.0687998	0.00015625	0.00015625			32.1	0.0685846	0.0435211	3.7842e-05	7.0801e-05			32.1	-0.00265512	-0.28273			32.1	0.000554	0.000618			32.1	0.0586888	0.198148	0.0736219			32.1	0.0642458	-0.00228008				32.1	0.101189	0.0479928	0.0477349				32.1	0.0568995	0.0777626
			32.2	0.041166	0.0722233	0.00015869	0.00015625			32.2	0.0672501	0.0414415	3.7842e-05	7.0801e-05			32.2	-0.00177055	-0.188537			32.2	0.000554	0.000618			32.2	0.0705691	0.183381	0.0736219			32.2	0.0628523	-0.000129061				32.2	0.0985915	0.0479928	0.0506119				32.2	0.0608457	0.0826513
			32.3	0.041166	0.0739351	0.00015869	0.00015625			32.3	0.0712537	0.0435211	3.7842e-05	7.0801e-05			32.3	-1.41531e-06	-0.000150709			32.3	0.000554	0.000619			32.3	0.0586888	0.153848	0.0736219			32.3	0.0642458	-0.000129061				32.3	0.0998904	0.0498343	0.0477349				32.3	0.0582149	0.0793921
			32.4	0.042866	0.0705116	0.00015747	0.00015625			32.4	0.0699192	0.0435211	3.9063e-05	7.0801e-05			32.4	-1.41531e-06	-0.000150709			32.4	0.000552	0.000618			32.4	0.0586888	0.148926	0.0646461			32.4	0.0656393	-0.000129061				32.4	0.0998904	0.0516758	0.0462964				32.4	0.0608457	0.076133
			32.5	0.0377658	0.0722233	0.00015625	0.00015625			32.5	0.0752573	0.0456006	4.0283e-05	7.0801e-05			32.5	-0.000885983	-0.0943438			32.5	0.000553	0.000618			32.5	0.067599	0.173537	0.0664413			32.5	0.0670328	-0.00335559				32.5	0.0998904	0.0479928	0.0477349				32.5	0.0595303	0.0793921
			32.6	0.0394659	0.0687998	0.00015625	0.00015625			32.6	0.0752573	0.0518393	4.2725e-05	7.0801e-05			32.6	-1.41531e-06	-0.000150709			32.6	0.000554	0.000618			32.6	0.0586888	0.173537	0.0664413			32.6	0.0628523	-0.00873314				32.6	0.0946948	0.0498343	0.0462964				32.6	0.0608457	0.0793921
			32.7	0.042866	0.0705116	0.00015625	0.00015747			32.7	0.0712537	0.058078	4.3945e-05	7.0801e-05			32.7	0.000883152	0.0940424			32.7	0.000558	0.000619			32.7	0.0586888	0.20307	0.0664413			32.7	0.0628523	-0.0119597				32.7	0.0972926	0.0535172	0.0506119				32.7	0.0595303	0.0793921
			32.8	0.0462661	0.067088	0.00015747	0.00015625			32.8	0.0712537	0.0539189	4.3945e-05	7.2021e-05			32.8	0.00265229	0.282429			32.8	0.000555	0.000618			32.8	0.0616589	0.178459	0.0682364			32.8	0.0600653	-0.0141107				32.8	0.0998904	0.0590416	0.0491734				32.8	0.0595303	0.0810217
			32.9	0.0445661	0.0687998	0.00015747	0.00015625			32.9	0.0739228	0.0539189	4.3945e-05	7.0801e-05			32.9	0.00619056	0.659201			32.9	0.000554	0.000618			32.9	0.0735392	0.173537	0.0718267			32.9	0.0600653	-0.0119597				32.9	0.0985915	0.0553587	0.0520503				32.9	0.0621611	0.0810217
			33	0.0462661	0.0687998	0.00015747	0.00015625			33	0.0779264	0.0539189	4.2725e-05	7.2021e-05			33	0.00619056	0.659201			33	0.000554	0.000618			33	0.064629	0.153848	0.0718267			33	0.0600653	-0.0130352				33	0.0972926	0.0535172	0.0520503				33	0.0608457	0.0793921
			33.1	0.0479662	0.0705116	0.00015747	0.00015747			33.1	0.0752573	0.0539189	3.9063e-05	7.2021e-05			33.1	0.00353685	0.376622			33.1	0.000555	0.000619			33.1	0.064629	0.153848	0.0718267			33.1	0.0614588	-0.0044311				33.1	0.0972926	0.0572001	0.0491734				33.1	0.0621611	0.0793921
			33.2	0.0445661	0.0705116	0.00015747	0.00015625			33.2	0.0739228	0.0518393	3.9063e-05	7.0801e-05			33.2	0.00265229	0.282429			33.2	0.000553	0.000618			33.2	0.0735392	0.178459	0.0718267			33.2	0.0600653	-0.00228008				33.2	0.0946948	0.0553587	0.0491734				33.2	0.0634766	0.0826513
			33.3	0.0513663	0.0705116	0.00015747	0.00015503			33.3	0.0712537	0.0518393	3.7842e-05	6.958e-05			33.3	0.00265229	0.282429			33.3	0.000553	0.000618			33.3	0.064629	0.183381	0.0736219			33.3	0.0600653	-0.0044311				33.3	0.0946948	0.0498343	0.0477349				33.3	0.0608457	0.0810217
			33.4	0.0462661	0.0739351	0.00015747	0.00015625			33.4	0.0739228	0.0476802	3.7842e-05	6.958e-05			33.4	0.00619056	0.659201			33.4	0.000555	0.000618			33.4	0.0586888	0.193225	0.0718267			33.4	0.0614588	-0.0141107				33.4	0.0972926	0.0553587	0.0477349				33.4	0.0634766	0.0810217
			33.5	0.0547664	0.0756469	0.00015747	0.00015747			33.5	0.0752573	0.0497598	3.9063e-05	7.0801e-05			33.5	0.00707512	0.753394			33.5	0.000553	0.000618			33.5	0.067599	0.153848	0.075417			33.5	0.0600653	-0.0162617				33.5	0.0972926	0.0535172	0.0520503				33.5	0.0621611	0.0826513
			33.6	0.0496663	0.0773587	0.00015625	0.00015625			33.6	0.0725883	0.0539189	4.0283e-05	7.2021e-05			33.6	0.00530599	0.565008			33.6	0.000554	0.00062			33.6	0.067599	0.15877	0.075417			33.6	0.0628523	-0.00873314				33.6	0.0959937	0.0516758	0.0506119				33.6	0.0608457	0.0777626
			33.7	0.0530664	0.0739351	0.00015747	0.00015625			33.7	0.0712537	0.0518393	4.0283e-05	7.2021e-05			33.7	0.00442142	0.470815			33.7	0.000555	0.000619			33.7	0.0616589	0.148926	0.0736219			33.7	0.0656393	-0.00873314				33.7	0.0972926	0.0553587	0.0534888				33.7	0.0634766	0.0810217
			33.8	0.0564665	0.0739351	0.00015747	0.00015747			33.8	0.0805955	0.0539189	4.0283e-05	7.3242e-05			33.8	0.00176772	0.188236			33.8	0.000555	0.000618			33.8	0.0586888	0.15877	0.0700316			33.8	0.0670328	-0.0044311				33.8	0.0959937	0.0516758	0.0462964				33.8	0.0621611	0.0826513
			33.9	0.0530664	0.0773587	0.00015869	0.00015747			33.9	0.0872682	0.0622371	3.9063e-05	7.2021e-05			33.9	0.00619056	0.659201			33.9	0.000555	0.000618			33.9	0.0616589	0.178459	0.0700316			33.9	0.0628523	-0.000129061				33.9	0.0959937	0.0498343	0.0520503				33.9	0.0634766	0.0842808
			34	0.0547664	0.0773587	0.00015747	0.00015747			34	0.0832646	0.0684758	3.9063e-05	7.2021e-05			34	0.00795969	0.847587			34	0.000557	0.000618			34	0.0586888	0.188303	0.0736219			34	0.0656393	-0.00335559				34	0.0985915	0.0553587	0.0506119				34	0.0621611	0.0842808
			34.1	0.0513663	0.0756469	0.00015747	0.00015625			34.1	0.079261	0.072635	3.9063e-05	7.3242e-05			34.1	0.00884426	0.94178			34.1	0.000554	0.000618			34.1	0.0586888	0.178459	0.075417			34.1	0.0656393	-0.0044311				34.1	0.0959937	0.0572001	0.0549273				34.1	0.0674228	0.0826513
			34.2	0.0496663	0.0739351	0.00015869	0.00015625			34.2	0.0752573	0.0747145	3.9063e-05	7.2021e-05			34.2	0.00707512	0.753394			34.2	0.000554	0.000618			34.2	0.067599	0.178459	0.0772122			34.2	0.0628523	-0.0044311				34.2	0.0998904	0.0572001	0.0563658				34.2	0.064792	0.0842808
			34.3	0.0496663	0.0705116	0.00015747	0.00015747			34.3	0.0779264	0.0705554	3.9063e-05	7.0801e-05			34.3	0.00442142	0.470815			34.3	0.000555	0.000619			34.3	0.0735392	0.163692	0.0772122			34.3	0.0642458	-0.00335559				34.3	0.0959937	0.0572001	0.0520503				34.3	0.0634766	0.0826513
			34.4	0.0496663	0.0653762	0.00015747	0.00015747			34.4	0.079261	0.0684758	3.7842e-05	7.0801e-05			34.4	0.00353685	0.376622			34.4	0.000555	0.000618			34.4	0.0616589	0.148926	0.075417			34.4	0.0670328	-0.00228008				34.4	0.0972926	0.0553587	0.0520503				34.4	0.0687382	0.0826513
			34.5	0.0513663	0.0705116	0.00015747	0.00015625			34.5	0.0805955	0.0663963	3.9063e-05	7.2021e-05			34.5	0.00619056	0.659201			34.5	0.000554	0.000618			34.5	0.067599	0.193225	0.0825977			34.5	0.0628523	-0.00335559				34.5	0.0985915	0.0535172	0.0534888				34.5	0.064792	0.0859104
			34.6	0.0496663	0.0687998	0.00015747	0.00015625			34.6	0.0805955	0.0663963	4.0283e-05	7.2021e-05			34.6	0.00795969	0.847587			34.6	0.000555	0.000619			34.6	0.067599	0.198148	0.0808025			34.6	0.0656393	-0.00120457				34.6	0.0998904	0.0572001	0.0563658				34.6	0.064792	0.0826513
			34.7	0.0479662	0.0705116	0.00015747	0.00015625			34.7	0.079261	0.0663963	4.0283e-05	7.2021e-05			34.7	0.00795969	0.847587			34.7	0.000554	0.000618			34.7	0.067599	0.183381	0.0790074			34.7	0.0628523	-0.000129061				34.7	0.0998904	0.0608831	0.0534888				34.7	0.064792	0.0842808
			34.8	0.0479662	0.0739351	0.00015869	0.00015625			34.8	0.079261	0.0643167	4.0283e-05	7.2021e-05			34.8	0.00795969	0.847587			34.8	0.000554	0.000618			34.8	0.064629	0.148926	0.0790074			34.8	0.0656393	0.00309747				34.8	0.101189	0.0590416	0.0534888				34.8	0.0661074	0.0810217
			34.9	0.0496663	0.0705116	0.00015747	0.00015625			34.9	0.0739228	0.0622371	4.0283e-05	7.2021e-05			34.9	0.00530599	0.565008			34.9	0.000555	0.000619			34.9	0.0616589	0.15877	0.075417			34.9	0.0628523	-0.00335559				34.9	0.106385	0.064566	0.0592428				34.9	0.0700536	0.0842808
			35	0.0479662	0.0687998	0.00015747	0.00015625			35	0.0765919	0.0601576	4.1504e-05	7.3242e-05			35	0.00619056	0.659201			35	0.000554	0.000619			35	0.0705691	0.193225	0.0808025			35	0.0614588	-0.00120457				35	0.102488	0.0608831	0.0534888				35	0.0634766	0.0875399
			35.1	0.0496663	0.0739351	0.00015747	0.00015625			35.1	0.079261	0.0643167	4.0283e-05	7.3242e-05			35.1	0.00442142	0.470815			35.1	0.000555	0.000618			35.1	0.0705691	0.207992	0.0772122			35.1	0.0642458	-0.00228008				35.1	0.102488	0.0590416	0.0578043				35.1	0.0687382	0.0826513
			35.2	0.0496663	0.0756469	0.00015869	0.00015747			35.2	0.0832646	0.0663963	3.9063e-05	7.3242e-05			35.2	0.00707512	0.753394			35.2	0.000554	0.000618			35.2	0.064629	0.168615	0.0772122			35.2	0.0614588	-0.00228008				35.2	0.103787	0.0553587	0.0549273				35.2	0.0661074	0.0875399
			35.3	0.0513663	0.0773587	0.00015991	0.00015625			35.3	0.0832646	0.0622371	3.6621e-05	7.2021e-05			35.3	0.00353685	0.376622			35.3	0.000553	0.000619			35.3	0.0735392	0.144004	0.0772122			35.3	0.0642458	-0.000129061				35.3	0.105086	0.0608831	0.0592428				35.3	0.0674228	0.0842808
			35.4	0.0513663	0.0790704	0.00015869	0.00015625			35.4	0.0805955	0.0705554	3.7842e-05	7.2021e-05			35.4	0.00176772	0.188236			35.4	0.000554	0.00062			35.4	0.0735392	0.144004	0.0825977			35.4	0.0642458	-0.00228008				35.4	0.102488	0.0590416	0.0578043				35.4	0.0674228	0.0859104
			35.5	0.0530664	0.0790704	0.00015625	0.00015503			35.5	0.079261	0.0684758	3.9063e-05	7.2021e-05			35.5	0.00176772	0.188236			35.5	0.000555	0.000619			35.5	0.067599	0.153848	0.0825977			35.5	0.0670328	0.00202196				35.5	0.105086	0.0608831	0.0578043				35.5	0.0661074	0.0875399
			35.6	0.0530664	0.0773587	0.00015869	0.00015625			35.6	0.0832646	0.0684758	3.7842e-05	7.2021e-05			35.6	0.00176772	0.188236			35.6	0.000554	0.000619			35.6	0.0616589	0.188303	0.086188			35.6	0.0656393	-0.00120457				35.6	0.103787	0.0590416	0.0592428				35.6	0.0687382	0.0875399
			35.7	0.0513663	0.0807822	0.00015869	0.00015747			35.7	0.0832646	0.0684758	3.7842e-05	7.2021e-05			35.7	0.00353685	0.376622			35.7	0.000555	0.00062			35.7	0.0765093	0.20307	0.0808025			35.7	0.0684263	0.00202196				35.7	0.102488	0.0627245	0.0592428				35.7	0.0661074	0.0891695
			35.8	0.0530664	0.0790704	0.00015747	0.00015747			35.8	0.0779264	0.0643167	4.0283e-05	7.2021e-05			35.8	0.00530599	0.565008			35.8	0.000555	0.00062			35.8	0.067599	0.207992	0.0808025			35.8	0.0726068	-0.000129061				35.8	0.103787	0.0627245	0.0606813				35.8	0.0661074	0.0859104
			35.9	0.0530664	0.0807822	0.00015747	0.00015625			35.9	0.0832646	0.0622371	4.0283e-05	7.4463e-05			35.9	0.00353685	0.376622			35.9	0.000554	0.00062			35.9	0.064629	0.207992	0.0825977			35.9	0.0740002	-0.00120457				35.9	0.102488	0.0664074	0.0578043				35.9	0.0687382	0.0875399
			36	0.0513663	0.0773587	0.00015747	0.00015625			36	0.0845991	0.058078	3.9063e-05	7.3242e-05			36	0.00176772	0.188236			36	0.000554	0.000619			36	0.0735392	0.193225	0.0808025			36	0.0684263	0.00202196				36	0.102488	0.0590416	0.0592428				36	0.0674228	0.0924286
			36.1	0.0530664	0.0756469	0.00015747	0.00015747			36.1	0.0859337	0.0643167	3.9063e-05	7.3242e-05			36.1	0.00265229	0.282429			36.1	0.000554	0.000619			36.1	0.0705691	0.188303	0.0790074			36.1	0.0656393	-0.0044311				36.1	0.105086	0.064566	0.0606813				36.1	0.0700536	0.0875399
			36.2	0.0530664	0.0756469	0.00015869	0.00015747			36.2	0.0845991	0.058078	3.9063e-05	7.3242e-05			36.2	0.00530599	0.565008			36.2	0.000555	0.00062			36.2	0.064629	0.198148	0.0790074			36.2	0.0684263	-0.00550661				36.2	0.106385	0.0627245	0.0578043				36.2	0.0700536	0.0907991
			36.3	0.0598666	0.0739351	0.00015747	0.00015625			36.3	0.0859337	0.0643167	4.0283e-05	7.2021e-05			36.3	0.00442142	0.470815			36.3	0.000555	0.000619			36.3	0.067599	0.198148	0.0790074			36.3	0.0684263	-0.00335559				36.3	0.102488	0.0627245	0.0606813				36.3	0.0700536	0.0907991
			36.4	0.0632667	0.0790704	0.00015747	0.00015747			36.4	0.0859337	0.0622371	3.9063e-05	7.3242e-05			36.4	0.00265229	0.282429			36.4	0.000555	0.000618			36.4	0.0705691	0.188303	0.0772122			36.4	0.0712133	-0.00550661				36.4	0.105086	0.0627245	0.0592428				36.4	0.0687382	0.0907991
			36.5	0.0632667	0.0756469	0.00015747	0.00015869			36.5	0.0899373	0.0622371	3.7842e-05	7.2021e-05			36.5	0.00265229	0.282429			36.5	0.000553	0.00062			36.5	0.0616589	0.163692	0.0843928			36.5	0.0740002	-0.0044311				36.5	0.105086	0.0608831	0.0606813				36.5	0.0687382	0.0940582
			36.6	0.0598666	0.0790704	0.00015747	0.00015747			36.6	0.0845991	0.0643167	3.9063e-05	7.2021e-05			36.6	0.00265229	0.282429			36.6	0.000555	0.000619			36.6	0.067599	0.193225	0.0843928			36.6	0.0726068	-0.0044311				36.6	0.106385	0.0627245	0.0592428				36.6	0.0700536	0.0875399
			36.7	0.0649668	0.0773587	0.00015747	0.00015625			36.7	0.0859337	0.0663963	3.9063e-05	7.3242e-05			36.7	0.00353685	0.376622			36.7	0.000554	0.00062			36.7	0.0705691	0.217836	0.0897783			36.7	0.0698198	-0.00765763				36.7	0.108983	0.0682489	0.0649968				36.7	0.0687382	0.0924286
			36.8	0.0666669	0.0739351	0.00015747	0.00015747			36.8	0.0859337	0.0747145	4.0283e-05	7.3242e-05			36.8	0.00530599	0.565008			36.8	0.000557	0.00062			36.8	0.064629	0.237525	0.0897783			36.8	0.0712133	-0.00980865				36.8	0.106385	0.0627245	0.0621198				36.8	0.0700536	0.0907991
			36.9	0.0615667	0.0756469	0.00015991	0.00015747			36.9	0.0872682	0.0747145	3.9063e-05	7.2021e-05			36.9	0.00353685	0.376622			36.9	0.000554	0.00062			36.9	0.0616589	0.198148	0.086188			36.9	0.0753937	-0.00658212				36.9	0.105086	0.0608831	0.0621198				36.9	0.071369	0.0907991
			37	0.0632667	0.082494	0.00015869	0.00015747			37	0.0832646	0.072635	3.9063e-05	7.2021e-05			37	0.00353685	0.376622			37	0.000554	0.000618			37	0.0705691	0.168615	0.086188			37	0.0726068	-0.00550661				37	0.103787	0.0627245	0.0649968				37	0.0674228	0.0940582
			37.1	0.0649668	0.082494	0.00015869	0.00015747			37.1	0.08193	0.0684758	4.0283e-05	7.3242e-05			37.1	0.00265229	0.282429			37.1	0.000554	0.00062			37.1	0.064629	0.173537	0.086188			37.1	0.0767872	-0.000129061				37.1	0.105086	0.064566	0.0635583				37.1	0.0726845	0.0907991
			37.2	0.0581666	0.0807822	0.00015869	0.00015503			37.2	0.0872682	0.0684758	3.9063e-05	7.4463e-05			37.2	0.00442142	0.470815			37.2	0.000554	0.00062			37.2	0.0557187	0.193225	0.0825977			37.2	0.0753937	0.00524849				37.2	0.105086	0.064566	0.0678737				37.2	0.071369	0.0956877
			37.3	0.0564665	0.0790704	0.00015747	0.00015503			37.3	0.0886027	0.0643167	4.0283e-05	7.4463e-05			37.3	0.00619056	0.659201			37.3	0.000555	0.00062			37.3	0.064629	0.217836	0.086188			37.3	0.0726068	0.006324				37.3	0.105086	0.064566	0.0664352				37.3	0.071369	0.0940582
			37.4	0.0615667	0.0756469	0.00015869	0.00015503			37.4	0.0886027	0.0684758	4.0283e-05	7.3242e-05			37.4	0.00619056	0.659201			37.4	0.000558	0.000619			37.4	0.0705691	0.232603	0.0843928			37.4	0.0712133	0.00847501				37.4	0.107684	0.0664074	0.0721892				37.4	0.0753153	0.0924286
			37.5	0.0598666	0.0722233	0.00015869	0.00015747			37.5	0.0899373	0.0684758	3.9063e-05	7.3242e-05			37.5	0.00353685	0.376622			37.5	0.000557	0.00062			37.5	0.0705691	0.222759	0.0879831			37.5	0.0698198	0.0073995				37.5	0.102488	0.0627245	0.0649968				37.5	0.071369	0.0973173
			37.6	0.0598666	0.0756469	0.00015747	0.00015625			37.6	0.0886027	0.0705554	4.0283e-05	7.3242e-05			37.6	0.00353685	0.376622			37.6	0.000558	0.000619			37.6	0.064629	0.193225	0.0879831			37.6	0.0712133	0.00417298				37.6	0.102488	0.064566	0.0664352				37.6	0.0726845	0.0940582
			37.7	0.0615667	0.0739351	0.00015869	0.00015869			37.7	0.0912718	0.0663963	4.1504e-05	7.3242e-05			37.7	0.00265229	0.282429			37.7	0.000564	0.00062			37.7	0.0735392	0.198148	0.0897783			37.7	0.0781807	0.006324				37.7	0.101189	0.0664074	0.0707507				37.7	0.071369	0.0973173
			37.8	0.0581666	0.0773587	0.00015869	0.00015747			37.8	0.0886027	0.0705554	4.0283e-05	7.2021e-05			37.8	0.00530599	0.565008			37.8	0.000575	0.00062			37.8	0.0705691	0.207992	0.0933686			37.8	0.0781807	0.00847501				37.8	0.101189	0.0664074	0.0649968				37.8	0.0726845	0.0956877
			37.9	0.0581666	0.0756469	0.00015991	0.00015747			37.9	0.0886027	0.0747145	4.1504e-05	7.3242e-05			37.9	0.00530599	0.565008			37.9	0.000566	0.000619			37.9	0.067599	0.227681	0.0933686			37.9	0.0753937	0.0073995				37.9	0.102488	0.0682489	0.0693122				37.9	0.0779461	0.0973173
			38	0.0615667	0.0773587	0.00015747	0.00015747			38	0.0899373	0.0767941	4.2725e-05	7.2021e-05			38	0.00707512	0.753394			38	0.000559	0.00062			38	0.067599	0.198148	0.0897783			38	0.0767872	0.00847501				38	0.102488	0.0700903	0.0678737				38	0.071369	0.0956877
			38.1	0.0649668	0.0756469	0.00015747	0.00015747			38.1	0.0939409	0.0747145	4.2725e-05	7.3242e-05			38.1	0.00442142	0.470815			38.1	0.000557	0.00062			38.1	0.0735392	0.217836	0.0915734			38.1	0.0795742	0.010626				38.1	0.0985915	0.0682489	0.0693122				38.1	0.0753153	0.0973173
			38.2	0.0632667	0.0773587	0.00015991	0.00015869			38.2	0.0859337	0.0747145	4.2725e-05	7.3242e-05			38.2	0.00530599	0.565008			38.2	0.000548	0.000619			38.2	0.0705691	0.212914	0.0879831			38.2	0.0809677	0.00847501				38.2	0.0998904	0.0682489	0.0693122				38.2	0.0739999	0.105465
			38.3	0.0615667	0.0773587	0.00015991	0.00015747			38.3	0.0805955	0.0684758	4.1504e-05	7.3242e-05			38.3	0.00619056	0.659201			38.3	0.000537	0.00062			38.3	0.067599	0.212914	0.0897783			38.3	0.0809677	0.006324				38.3	0.101189	0.0700903	0.0693122				38.3	0.0739999	0.0989469
			38.4	0.0615667	0.0790704	0.00015869	0.00015747			38.4	0.08193	0.0684758	4.2725e-05	7.3242e-05			38.4	0.00707512	0.753394			38.4	0.000549	0.000621			38.4	0.0735392	0.227681	0.0879831			38.4	0.0851482	0.00309747				38.4	0.102488	0.0719318	0.0721892				38.4	0.0753153	0.0989469
			38.5	0.0598666	0.0807822	0.00015869	0.00015747			38.5	0.0859337	0.072635	4.2725e-05	7.4463e-05			38.5	0.00707512	0.753394			38.5	0.000557	0.00062			38.5	0.0705691	0.237525	0.0879831			38.5	0.0823612	0.000946448				38.5	0.101189	0.0719318	0.0664352				38.5	0.0753153	0.102206
			38.6	0.0615667	0.0807822	0.00015869	0.00015625			38.6	0.0832646	0.072635	4.1504e-05	7.4463e-05			38.6	0.0106134	1.13017			38.6	0.000555	0.00062			38.6	0.0735392	0.20307	0.0915734			38.6	0.0767872	0.00417298				38.6	0.102488	0.0719318	0.0736277				38.6	0.0753153	0.0956877
			38.7	0.0598666	0.0807822	0.00015991	0.00015747			38.7	0.0805955	0.072635	4.1504e-05	7.3242e-05			38.7	0.00795969	0.847587			38.7	0.000555	0.000618			38.7	0.0765093	0.212914	0.0915734			38.7	0.0795742	0.00417298				38.7	0.103787	0.0682489	0.0678737				38.7	0.0766307	0.103836
			38.8	0.0615667	0.082494	0.00015991	0.00015747			38.8	0.0832646	0.0747145	4.0283e-05	7.2021e-05			38.8	0.00530599	0.565008			38.8	0.000555	0.00062			38.8	0.0824494	0.212914	0.0933686			38.8	0.0809677	0.00524849				38.8	0.105086	0.0700903	0.0721892				38.8	0.0766307	0.0989469
			38.9	0.0632667	0.0842058	0.00015991	0.00015747			38.9	0.0832646	0.0788736	4.1504e-05	7.2021e-05			38.9	0.00619056	0.659201			38.9	0.000555	0.000619			38.9	0.0735392	0.212914	0.0951637			38.9	0.0753937	0.010626				38.9	0.103787	0.0719318	0.0707507				38.9	0.0805769	0.100576
			39	0.0649668	0.0842058	0.00015991	0.00015869			39	0.0859337	0.0747145	4.1504e-05	7.3242e-05			39	0.00530599	0.565008			39	0.000555	0.00062			39	0.0705691	0.222759	0.0951637			39	0.0823612	0.00847501				39	0.105086	0.0737733	0.0721892				39	0.0753153	0.105465
			39.1	0.0615667	0.0842058	0.00015869	0.00015747			39.1	0.0845991	0.0767941	4.1504e-05	7.2021e-05			39.1	0.00795969	0.847587			39.1	0.000555	0.00062			39.1	0.0824494	0.24737	0.0951637			39.1	0.0781807	0.00955052				39.1	0.102488	0.0719318	0.0736277				39.1	0.0792615	0.100576
			39.2	0.0598666	0.082494	0.00016113	0.00015625			39.2	0.079261	0.0809532	3.9063e-05	7.3242e-05			39.2	0.0106134	1.13017			39.2	0.000557	0.00062			39.2	0.0735392	0.20307	0.0951637			39.2	0.0767872	0.00847501				39.2	0.105086	0.0774562	0.0721892				39.2	0.0779461	0.103836
			39.3	0.0632667	0.0790704	0.00015991	0.00015625			39.3	0.0845991	0.0788736	4.0283e-05	7.4463e-05			39.3	0.00795969	0.847587			39.3	0.000557	0.000619			39.3	0.0735392	0.20307	0.0951637			39.3	0.0726068	0.00524849				39.3	0.103787	0.0719318	0.0750662				39.3	0.0792615	0.100576
			39.4	0.0632667	0.0807822	0.00015991	0.00015503			39.4	0.0912718	0.0747145	4.1504e-05	7.5684e-05			39.4	0.00530599	0.565008			39.4	0.000557	0.00062			39.4	0.0794794	0.198148	0.0933686			39.4	0.0726068	0.00847501				39.4	0.101189	0.0737733	0.0750662				39.4	0.0818923	0.100576
			39.5	0.0649668	0.0790704	0.00016113	0.00015747			39.5	0.101948	0.0705554	4.0283e-05	7.4463e-05			39.5	0.00707512	0.753394			39.5	0.000557	0.000619			39.5	0.0794794	0.212914	0.0915734			39.5	0.0753937	0.0117015				39.5	0.103787	0.0737733	0.0750662				39.5	0.0753153	0.105465
			39.6	0.0666669	0.0807822	0.00015991	0.00015747			39.6	0.103283	0.072635	4.0283e-05	7.4463e-05			39.6	0.00795969	0.847587			39.6	0.000555	0.00062			39.6	0.0735392	0.24737	0.0897783			39.6	0.0726068	0.00847501				39.6	0.103787	0.0737733	0.0750662				39.6	0.0805769	0.0989469
			39.7	0.0649668	0.082494	0.00015991	0.00015869			39.7	0.103283	0.072635	4.0283e-05	7.4463e-05			39.7	0.00972883	1.03597			39.7	0.000555	0.00062			39.7	0.0765093	0.242447	0.0951637			39.7	0.0767872	0.00955052				39.7	0.105086	0.0737733	0.0736277				39.7	0.0792615	0.105465
			39.8	0.0632667	0.0842058	0.00015991	0.00015625			39.8	0.104617	0.072635	3.9063e-05	7.4463e-05			39.8	0.0123825	1.31855			39.8	0.000557	0.000619			39.8	0.0794794	0.207992	0.0933686			39.8	0.0809677	0.0117015				39.8	0.106385	0.0774562	0.0736277				39.8	0.0805769	0.102206
			39.9	0.0683669	0.0842058	0.00016113	0.00015747			39.9	0.104617	0.072635	4.0283e-05	7.4463e-05			39.9	0.00884426	0.94178			39.9	0.000557	0.00062			39.9	0.0616589	0.188303	0.0969589			39.9	0.0781807	0.0149281				39.9	0.108983	0.0756147	0.0678737				39.9	0.0832078	0.102206
			40	0.070067	0.082494	0.00015991	0.00015747			40	0.101948	0.0747145	4.1504e-05	7.3242e-05			40	0.00619056	0.659201			40	0.000555	0.000619			40	0.0557187	0.198148	0.0969589			40	0.0767872	0.0149281				40	0.106385	0.0774562	0.0750662				40	0.0792615	0.105465
			40.1	0.0649668	0.0859176	0.00015991	0.00015869			40.1	0.099279	0.0767941	4.1504e-05	7.3242e-05			40.1	0.00795969	0.847587			40.1	0.000555	0.00062			40.1	0.0616589	0.227681	0.0933686			40.1	0.0767872	0.00309747				40.1	0.106385	0.0774562	0.0750662				40.1	0.0818923	0.102206
			40.2	0.071767	0.0859176	0.00015991	0.00015747			40.2	0.100614	0.0747145	4.2725e-05	7.3242e-05			40.2	0.00884426	0.94178			40.2	0.000555	0.000621			40.2	0.0586888	0.24737	0.0969589			40.2	0.0740002	0.00955052				40.2	0.108983	0.0774562	0.0750662				40.2	0.0805769	0.103836
			40.3	0.070067	0.0876293	0.00015991	0.00015747			40.3	0.104617	0.0788736	4.1504e-05	7.4463e-05			40.3	0.0106134	1.13017			40.3	0.000555	0.00062			40.3	0.0586888	0.222759	0.098754			40.3	0.0753937	0.0138526				40.3	0.105086	0.0756147	0.0736277				40.3	0.0832078	0.107095
			40.4	0.070067	0.0910529	0.00016113	0.00015747			40.4	0.100614	0.0809532	4.1504e-05	7.5684e-05			40.4	0.011498	1.22436			40.4	0.000557	0.000621			40.4	0.067599	0.193225	0.100549			40.4	0.0781807	0.0127771				40.4	0.103787	0.0774562	0.0750662				40.4	0.0832078	0.103836
			40.5	0.070067	0.0893411	0.00016113	0.00015869			40.5	0.0952754	0.0830328	4.0283e-05	7.4463e-05			40.5	0.00972883	1.03597			40.5	0.000557	0.00062			40.5	0.064629	0.183381	0.102344			40.5	0.0767872	0.0117015				40.5	0.103787	0.0774562	0.0750662				40.5	0.0805769	0.105465
			40.6	0.070067	0.0859176	0.00015991	0.00015747			40.6	0.0979445	0.0830328	4.0283e-05	7.3242e-05			40.6	0.00707512	0.753394			40.6	0.000557	0.000621			40.6	0.064629	0.217836	0.098754			40.6	0.0767872	0.0117015				40.6	0.0998904	0.0792976	0.0750662				40.6	0.0845232	0.107095
			40.7	0.071767	0.0893411	0.00015991	0.00015747			40.7	0.100614	0.0809532	4.0283e-05	7.3242e-05			40.7	0.00707512	0.753394			40.7	0.000557	0.000621			40.7	0.0586888	0.232603	0.0969589			40.7	0.0726068	0.010626				40.7	0.102488	0.0774562	0.0793817				40.7	0.0805769	0.103836
			40.8	0.0734671	0.0893411	0.00015991	0.00015747			40.8	0.099279	0.0747145	3.9063e-05	7.4463e-05			40.8	0.00884426	0.94178			40.8	0.000557	0.000623			40.8	0.067599	0.232603	0.0933686			40.8	0.0684263	0.0149281				40.8	0.102488	0.0811391	0.0779432				40.8	0.0818923	0.107095
			40.9	0.070067	0.0876293	0.00016113	0.00015747			40.9	0.101948	0.0788736	4.0283e-05	7.4463e-05			40.9	0.0106134	1.13017			40.9	0.000557	0.000621			40.9	0.0586888	0.212914	0.0969589			40.9	0.0698198	0.0138526				40.9	0.101189	0.0792976	0.0765047				40.9	0.0818923	0.107095
			41	0.071767	0.0876293	0.00016113	0.00015747			41	0.100614	0.0788736	4.1504e-05	7.4463e-05			41	0.0123825	1.31855			41	0.000557	0.000621			41	0.0557187	0.198148	0.102344			41	0.0753937	0.0127771				41	0.101189	0.0774562	0.0822586				41	0.0845232	0.105465
			41.1	0.0734671	0.0876293	0.00015869	0.00015747			41.1	0.0979445	0.0767941	4.1504e-05	7.4463e-05			41.1	0.0106134	1.13017			41.1	0.000557	0.000621			41.1	0.0557187	0.217836	0.100549			41.1	0.0809677	0.00955052				41.1	0.102488	0.0774562	0.0750662				41.1	0.087154	0.108724
			41.2	0.070067	0.0859176	0.00015991	0.00015869			41.2	0.103283	0.0788736	4.2725e-05	7.5684e-05			41.2	0.00619056	0.659201			41.2	0.000558	0.000621			41.2	0.064629	0.20307	0.100549			41.2	0.0809677	0.00847501				41.2	0.102488	0.0811391	0.0779432				41.2	0.0858386	0.108724
			41.3	0.0734671	0.0876293	0.00016113	0.00015869			41.3	0.103283	0.0809532	4.1504e-05	7.5684e-05			41.3	0.00707512	0.753394			41.3	0.000557	0.000621			41.3	0.067599	0.227681	0.102344			41.3	0.0809677	0.0117015				41.3	0.102488	0.0774562	0.0779432				41.3	0.0858386	0.108724
			41.4	0.071767	0.0859176	0.00016113	0.00015869			41.4	0.100614	0.0767941	4.0283e-05	7.3242e-05			41.4	0.00972883	1.03597			41.4	0.000558	0.000621			41.4	0.064629	0.252292	0.100549			41.4	0.0767872	0.010626				41.4	0.101189	0.0829806	0.0779432				41.4	0.0832078	0.110354
			41.5	0.0734671	0.0910529	0.00016113	0.00015747			41.5	0.103283	0.0788736	4.1504e-05	7.4463e-05			41.5	0.011498	1.22436			41.5	0.000557	0.000621			41.5	0.0735392	0.227681	0.10773			41.5	0.0753937	0.00955052				41.5	0.101189	0.0811391	0.0822586				41.5	0.087154	0.108724
			41.6	0.0768672	0.0927647	0.00015991	0.00015747			41.6	0.105952	0.0788736	4.1504e-05	7.5684e-05			41.6	0.0123825	1.31855			41.6	0.000559	0.000621			41.6	0.0854195	0.207992	0.10773			41.6	0.0795742	0.0127771				41.6	0.105086	0.0829806	0.0808202				41.6	0.087154	0.111983
			41.7	0.0768672	0.0944765	0.00015991	0.00015747			41.7	0.103283	0.0788736	4.0283e-05	7.5684e-05			41.7	0.00972883	1.03597			41.7	0.000557	0.000621			41.7	0.0854195	0.20307	0.105935			41.7	0.0823612	0.00955052				41.7	0.103787	0.0811391	0.0836971				41.7	0.0818923	0.107095
			41.8	0.0768672	0.0944765	0.00015991	0.00015869			41.8	0.100614	0.0830328	4.0283e-05	7.5684e-05			41.8	0.00795969	0.847587			41.8	0.000557	0.000621			41.8	0.0824494	0.217836	0.105935			41.8	0.0823612	0.00955052				41.8	0.102488	0.0811391	0.0793817				41.8	0.0884694	0.110354
			41.9	0.0734671	0.0927647	0.00016113	0.00015869			41.9	0.100614	0.0851123	4.0283e-05	7.3242e-05			41.9	0.00795969	0.847587			41.9	0.000557	0.000619			41.9	0.0883896	0.252292	0.102344			41.9	0.0795742	0.0149281				41.9	0.102488	0.0811391	0.0836971				41.9	0.0845232	0.111983
			42	0.0768672	0.0927647	0.00016113	0.00015869			42	0.101948	0.0788736	4.0283e-05	7.4463e-05			42	0.0106134	1.13017			42	0.000559	0.00062			42	0.0883896	0.24737	0.100549			42	0.0767872	0.0224566				42	0.103787	0.0811391	0.0808202				42	0.0858386	0.108724
			42.1	0.0785673	0.0944765	0.00015991	0.00015747			42.1	0.107286	0.0809532	4.1504e-05	7.5684e-05			42.1	0.011498	1.22436			42.1	0.000557	0.000621			42.1	0.0854195	0.222759	0.104139			42.1	0.0795742	0.0246077				42.1	0.103787	0.0866635	0.0808202				42.1	0.087154	0.110354
			42.2	0.0768672	0.0893411	0.00015991	0.00015747			42.2	0.103283	0.0767941	4.1504e-05	7.4463e-05			42.2	0.0132671	1.41275			42.2	0.000557	0.00062			42.2	0.0913597	0.227681	0.105935			42.2	0.0837547	0.0224566				42.2	0.103787	0.084822	0.0836971				42.2	0.0858386	0.107095
			42.3	0.0768672	0.0910529	0.00015991	0.00015747			42.3	0.100614	0.0809532	4.1504e-05	7.4463e-05			42.3	0.0106134	1.13017			42.3	0.000557	0.00062			42.3	0.0913597	0.227681	0.105935			42.3	0.0823612	0.0203056				42.3	0.105086	0.084822	0.0822586				42.3	0.0884694	0.105465
			42.4	0.0785673	0.0876293	0.00016113	0.00015747			42.4	0.0926064	0.0767941	4.1504e-05	7.4463e-05			42.4	0.00795969	0.847587			42.4	0.000557	0.000621			42.4	0.0883896	0.222759	0.10773			42.4	0.0809677	0.0170791				42.4	0.105086	0.084822	0.0851356				42.4	0.0858386	0.111983
			42.5	0.0802673	0.0893411	0.00015991	0.00015869			42.5	0.101948	0.0809532	4.1504e-05	7.4463e-05			42.5	0.0150362	1.60113			42.5	0.000557	0.00062			42.5	0.0913597	0.237525	0.105935			42.5	0.0795742	0.0160036				42.5	0.106385	0.0829806	0.0836971				42.5	0.0911002	0.107095
			42.6	0.0785673	0.0927647	0.00016113	0.00015991			42.6	0.104617	0.0809532	4.1504e-05	7.5684e-05			42.6	0.0176899	1.88371			42.6	0.000557	0.000623			42.6	0.0943298	0.24737	0.104139			42.6	0.0795742	0.0192301				42.6	0.107684	0.0829806	0.0851356				42.6	0.0884694	0.113613
			42.7	0.0785673	0.0910529	0.00016113	0.00015747			42.7	0.101948	0.0830328	4.1504e-05	7.4463e-05			42.7	0.0185745	1.9779			42.7	0.000557	0.00062			42.7	0.0854195	0.222759	0.100549			42.7	0.0767872	0.0170791				42.7	0.108983	0.0903464	0.0822586				42.7	0.0884694	0.110354
			42.8	0.0751672	0.0961882	0.00016113	0.00015747			42.8	0.100614	0.0830328	4.2725e-05	7.4463e-05			42.8	0.0203436	2.16629			42.8	0.000558	0.000621			42.8	0.0854195	0.217836	0.105935			42.8	0.0823612	0.0181546				42.8	0.107684	0.0885049	0.0808202				42.8	0.0897848	0.110354
			42.9	0.0768672	0.0979	0.00015991	0.00015747			42.9	0.100614	0.0871919	4.1504e-05	7.4463e-05			42.9	0.0203436	2.16629			42.9	0.000559	0.000621			42.9	0.0854195	0.20307	0.105935			42.9	0.0823612	0.0181546				42.9	0.108983	0.0885049	0.0880126				42.9	0.087154	0.110354
			43	0.0751672	0.101324	0.00016113	0.00015869			43	0.101948	0.0871919	4.2725e-05	7.5684e-05			43	0.0194591	2.0721			43	0.000557	0.000623			43	0.0943298	0.232603	0.10773			43	0.0865417	0.0149281				43	0.108983	0.0866635	0.0822586				43	0.0884694	0.110354
			43.1	0.071767	0.0979	0.00016113	0.00015869			43.1	0.103283	0.0871919	4.2725e-05	7.5684e-05			43.1	0.0185745	1.9779			43.1	0.000557	0.000621			43.1	0.0883896	0.252292	0.102344			43.1	0.0837547	0.00955052				43.1	0.105086	0.0866635	0.0836971				43.1	0.0884694	0.113613
			43.2	0.0734671	0.0996118	0.00016113	0.00015869			43.2	0.100614	0.091351	4.2725e-05	7.4463e-05			43.2	0.0176899	1.88371			43.2	0.000557	0.000621			43.2	0.0854195	0.257214	0.104139			43.2	0.0795742	0.010626				43.2	0.108983	0.0866635	0.0836971				43.2	0.0897848	0.113613
			43.3	0.0785673	0.0961882	0.00015991	0.00015991			43.3	0.099279	0.0892715	4.2725e-05	7.5684e-05			43.3	0.0123825	1.31855			43.3	0.000557	0.000621			43.3	0.0943298	0.242447	0.104139			43.3	0.0809677	0.00847501				43.3	0.106385	0.0921879	0.0822586				43.3	0.0924156	0.111983
			43.4	0.0768672	0.0944765	0.00016113	0.00015869			43.4	0.0979445	0.0871919	4.2725e-05	7.4463e-05			43.4	0.0132671	1.41275			43.4	0.000558	0.000623			43.4	0.0913597	0.237525	0.105935			43.4	0.0823612	0.00847501				43.4	0.106385	0.0866635	0.0851356				43.4	0.0911002	0.115242
			43.5	0.0768672	0.0944765	0.00016235	0.00015869			43.5	0.103283	0.0871919	4.1504e-05	7.5684e-05			43.5	0.0141517	1.50694			43.5	0.000558	0.000623			43.5	0.0883896	0.232603	0.10773			43.5	0.0893287	0.0073995				43.5	0.107684	0.0940293	0.0822586				43.5	0.0937311	0.111983
			43.6	0.0768672	0.0944765	0.00016113	0.00015991			43.6	0.101948	0.0830328	4.2725e-05	7.5684e-05			43.6	0.0132671	1.41275			43.6	0.000557	0.000623			43.6	0.0972998	0.237525	0.105935			43.6	0.0865417	0.0073995				43.6	0.11158	0.0885049	0.0836971				43.6	0.0911002	0.111983
			43.7	0.0768672	0.0944765	0.00016113	0.00015747			43.7	0.101948	0.0830328	4.7607e-05	7.5684e-05			43.7	0.011498	1.22436			43.7	0.000558	0.000621			43.7	0.10324	0.301514	0.109525			43.7	0.0851482	0.0073995				43.7	0.107684	0.0921879	0.0836971				43.7	0.0924156	0.115242
			43.8	0.0768672	0.0961882	0.00016235	0.00015991			43.8	0.101948	0.0851123	4.7607e-05	7.6904e-05			43.8	0.0123825	1.31855			43.8	0.000559	0.00062			43.8	0.0913597	0.281825	0.10773			43.8	0.0851482	0.006324				43.8	0.108983	0.0885049	0.0808202				43.8	0.0897848	0.113613
			43.9	0.0768672	0.0961882	0.00016235	0.00015869			43.9	0.103283	0.0851123	4.7607e-05	7.5684e-05			43.9	0.0159208	1.69533			43.9	0.000557	0.000623			43.9	0.0854195	0.267058	0.10773			43.9	0.0865417	0.00417298				43.9	0.11158	0.0940293	0.0865741				43.9	0.0884694	0.118502
			44	0.0768672	0.0996118	0.00016235	0.00015991			44	0.103283	0.0830328	4.7607e-05	7.5684e-05			44	0.0176899	1.88371			44	0.000557	0.000621			44	0.0913597	0.252292	0.113115			44	0.0865417	0.006324				44	0.108983	0.0903464	0.0865741				44	0.0950465	0.116872
			44.1	0.0785673	0.101324	0.00016113	0.00015869			44.1	0.109955	0.0871919	4.6387e-05	7.6904e-05			44.1	0.0176899	1.88371			44.1	0.000558	0.000621			44.1	0.0972998	0.252292	0.113115			44.1	0.0893287	0.00417298				44.1	0.108983	0.0940293	0.0908896				44.1	0.0911002	0.111983
			44.2	0.0785673	0.101324	0.00016113	0.00015991			44.2	0.100614	0.0892715	4.2725e-05	7.6904e-05			44.2	0.0159208	1.69533			44.2	0.000558	0.000623			44.2	0.0913597	0.276903	0.11132			44.2	0.0921157	0.00417298				44.2	0.108983	0.0903464	0.0880126				44.2	0.0937311	0.118502
			44.3	0.0785673	0.103035	0.00016113	0.00015869			44.3	0.099279	0.0892715	4.2725e-05	7.5684e-05			44.3	0.0132671	1.41275			44.3	0.000557	0.000623			44.3	0.0943298	0.276903	0.10773			44.3	0.0949027	0.000946448				44.3	0.105086	0.0940293	0.0908896				44.3	0.0950465	0.115242
			44.4	0.0802673	0.103035	0.00016113	0.00015991			44.4	0.101948	0.0934306	4.1504e-05	7.5684e-05			44.4	0.0141517	1.50694			44.4	0.000559	0.000623			44.4	0.10324	0.262136	0.104139			44.4	0.0893287	0.00309747				44.4	0.106385	0.0903464	0.0908896				44.4	0.0937311	0.118502
			44.5	0.0802673	0.101324	0.00016113	0.00015991			44.5	0.109955	0.091351	4.0283e-05	7.5684e-05			44.5	0.0176899	1.88371			44.5	0.000558	0.000623			44.5	0.10027	0.267058	0.105935			44.5	0.0893287	0.00847501				44.5	0.107684	0.0995537	0.0880126				44.5	0.0950465	0.118502
			44.6	0.0785673	0.0996118	0.00016113	0.00015991			44.6	0.113959	0.0934306	4.1504e-05	7.6904e-05			44.6	0.0159208	1.69533			44.6	0.000558	0.000623			44.6	0.0913597	0.24737	0.10773			44.6	0.0865417	0.0073995				44.6	0.108983	0.0977122	0.0923281				44.6	0.0924156	0.116872
			44.7	0.0768672	0.0996118	0.00016113	0.00015747			44.7	0.113959	0.0955101	4.1504e-05	7.6904e-05			44.7	0.0176899	1.88371			44.7	0.000558	0.000623			44.7	0.10027	0.24737	0.10773			44.7	0.0865417	0.00955052				44.7	0.108983	0.0995537	0.0894511				44.7	0.0950465	0.118502
			44.8	0.0802673	0.0979	0.00016113	0.00015991			44.8	0.107286	0.0955101	4.1504e-05	7.5684e-05			44.8	0.0176899	1.88371			44.8	0.000558	0.000623			44.8	0.10027	0.262136	0.11491			44.8	0.0879352	0.0073995				44.8	0.106385	0.0977122	0.0908896				44.8	0.0924156	0.116872
			44.9	0.0785673	0.0944765	0.00016235	0.00015869			44.9	0.105952	0.0955101	4.1504e-05	7.6904e-05			44.9	0.0159208	1.69533			44.9	0.000557	0.000623			44.9	0.0972998	0.281825	0.113115			44.9	0.0893287	0.006324				44.9	0.106385	0.0977122	0.0894511				44.9	0.0937311	0.116872
			45	0.0785673	0.0996118	0.00016235	0.00015991			45	0.109955	0.0892715	4.1504e-05	7.6904e-05			45	0.0159208	1.69533			45	0.000557	0.000623			45	0.10324	0.276903	0.11491			45	0.0893287	0.006324				45	0.107684	0.0958708	0.0880126				45	0.0924156	0.120131
			45.1	0.0802673	0.0996118	0.00016113	0.00015869			45.1	0.107286	0.0892715	4.2725e-05	7.6904e-05			45.1	0.0185745	1.9779			45.1	0.000558	0.000625			45.1	0.10324	0.257214	0.113115			45.1	0.0935092	0.0117015				45.1	0.106385	0.101395	0.0908896				45.1	0.0950465	0.115242
			45.2	0.0802673	0.0996118	0.00016113	0.00015869			45.2	0.105952	0.0955101	4.1504e-05	7.6904e-05			45.2	0.0194591	2.0721			45.2	0.000557	0.000624			45.2	0.0972998	0.242447	0.11491			45.2	0.0935092	0.0127771				45.2	0.107684	0.0958708	0.0894511				45.2	0.0937311	0.118502
			45.3	0.0768672	0.0996118	0.00015991	0.00015991			45.3	0.103283	0.0955101	4.1504e-05	7.6904e-05			45.3	0.0176899	1.88371			45.3	0.000558	0.000624			45.3	0.0972998	0.257214	0.11132			45.3	0.0921157	0.00847501				45.3	0.108983	0.0995537	0.0966436				45.3	0.0924156	0.118502
			45.4	0.0819674	0.103035	0.00016113	0.00015991			45.4	0.105952	0.091351	4.1504e-05	7.5684e-05			45.4	0.0176899	1.88371			45.4	0.000557	0.000624			45.4	0.11215	0.242447	0.109525			45.4	0.0893287	0.00955052				45.4	0.107684	0.0977122	0.0923281				45.4	0.0976773	0.116872
			45.5	0.0836675	0.103035	0.00016113	0.00015991			45.5	0.107286	0.0934306	4.2725e-05	7.6904e-05			45.5	0.0159208	1.69533			45.5	0.000558	0.000625			45.5	0.10324	0.262136	0.113115			45.5	0.0907222	0.00847501				45.5	0.106385	0.0977122	0.0937666				45.5	0.0950465	0.121761
			45.6	0.0836675	0.106459	0.00016235	0.00015869			45.6	0.108621	0.0934306	4.2725e-05	7.6904e-05			45.6	0.0159208	1.69533			45.6	0.000558	0.000624			45.6	0.0972998	0.271981	0.113115			45.6	0.0921157	0.00309747				45.6	0.107684	0.0977122	0.0952051				45.6	0.0976773	0.121761
			45.7	0.0870676	0.104747	0.00015991	0.00016113			45.7	0.108621	0.101749	4.2725e-05	7.6904e-05			45.7	0.0185745	1.9779			45.7	0.000558	0.000623			45.7	0.10027	0.281825	0.11491			45.7	0.0990832	0.00417298				45.7	0.11158	0.101395	0.0923281				45.7	0.0937311	0.120131
			45.8	0.0870676	0.104747	0.00016235	0.00015991			45.8	0.105952	0.0975897	4.1504e-05	7.5684e-05			45.8	0.0194591	2.0721			45.8	0.000557	0.000625			45.8	0.10027	0.271981	0.113115			45.8	0.100477	0.0073995				45.8	0.108983	0.103237	0.0966436				45.8	0.0976773	0.12502
			45.9	0.0819674	0.104747	0.00015991	0.00015869			45.9	0.109955	0.0955101	4.1504e-05	7.6904e-05			45.9	0.0194591	2.0721			45.9	0.000557	0.000624			45.9	0.0854195	0.24737	0.113115			45.9	0.0935092	0.0073995				45.9	0.107684	0.101395	0.0923281				45.9	0.0989927	0.118502
			46	0.0870676	0.101324	0.00016113	0.00015869			46	0.120632	0.0934306	4.1504e-05	7.6904e-05			46	0.0194591	2.0721			46	0.000557	0.000625			46	0.0943298	0.257214	0.11491			46	0.0935092	0.00955052				46	0.107684	0.103237	0.0937666				46	0.0950465	0.118502
			46.1	0.0836675	0.0996118	0.00016357	0.00015991			46.1	0.117963	0.0934306	4.0283e-05	7.8125e-05			46.1	0.0176899	1.88371			46.1	0.000558	0.000624			46.1	0.10027	0.237525	0.120296			46.1	0.0921157	0.010626				46.1	0.110282	0.0977122	0.0880126				46.1	0.0976773	0.12339
			46.2	0.0819674	0.103035	0.00016235	0.00015869			46.2	0.112624	0.091351	4.1504e-05	7.6904e-05			46.2	0.0203436	2.16629			46.2	0.000557	0.000625			46.2	0.10027	0.257214	0.118501			46.2	0.0921157	0.00955052				46.2	0.107684	0.101395	0.0880126				46.2	0.0950465	0.120131
			46.3	0.0853675	0.106459	0.00016235	0.00016113			46.3	0.113959	0.091351	4.2725e-05	7.6904e-05			46.3	0.0203436	2.16629			46.3	0.000558	0.000625			46.3	0.0943298	0.276903	0.116706			46.3	0.0921157	0.0073995				46.3	0.107684	0.0995537	0.0908896				46.3	0.0989927	0.126649
			46.4	0.0853675	0.106459	0.00016235	0.00015991			46.4	0.115294	0.091351	4.2725e-05	7.6904e-05			46.4	0.0203436	2.16629			46.4	0.000557	0.000624			46.4	0.10027	0.24737	0.11132			46.4	0.0949027	0.00847501				46.4	0.106385	0.103237	0.0880126				46.4	0.0989927	0.12502
			46.5	0.0853675	0.106459	0.00016357	0.00015869			46.5	0.115294	0.0955101	4.2725e-05	7.6904e-05			46.5	0.0185745	1.9779			46.5	0.000558	0.000625			46.5	0.10324	0.227681	0.113115			46.5	0.0976897	0.00955052				46.5	0.110282	0.101395	0.0937666				46.5	0.0989927	0.12339
			46.6	0.0853675	0.104747	0.00016235	0.00015991			46.6	0.113959	0.0996693	4.2725e-05	7.8125e-05			46.6	0.0150362	1.60113			46.6	0.000558	0.000625			46.6	0.10027	0.222759	0.116706			46.6	0.100477	0.0073995				46.6	0.108983	0.105078	0.0894511				46.6	0.101624	0.12339
			46.7	0.0870676	0.108171	0.00016357	0.00015991			46.7	0.109955	0.0975897	4.2725e-05	7.6904e-05			46.7	0.0159208	1.69533			46.7	0.000558	0.000624			46.7	0.10027	0.232603	0.11491			46.7	0.0976897	0.0073995				46.7	0.108983	0.101395	0.0966436				46.7	0.101624	0.121761
			46.8	0.0853675	0.111594	0.00016235	0.00016113			46.8	0.113959	0.0996693	4.1504e-05	7.5684e-05			46.8	0.0159208	1.69533			46.8	0.000558	0.000624			46.8	0.10621	0.252292	0.118501			46.8	0.0962962	0.0117015				46.8	0.106385	0.103237	0.0937666				46.8	0.100308	0.129908
			46.9	0.0870676	0.113306	0.00016235	0.00016113			46.9	0.113959	0.101749	4.0283e-05	7.6904e-05			46.9	0.0176899	1.88371			46.9	0.000558	0.000625			46.9	0.10621	0.257214	0.118501			46.9	0.0949027	0.00955052				46.9	0.108983	0.101395	0.098082				46.9	0.0963619	0.128279
			47	0.0870676	0.11673	0.00016235	0.00016113			47	0.124635	0.103828	4.1504e-05	7.8125e-05			47	0.0194591	2.0721			47	0.000557	0.000625			47	0.10324	0.252292	0.120296			47	0.0935092	0.0127771				47	0.107684	0.105078	0.098082				47	0.0989927	0.126649
			47.1	0.0853675	0.109882	0.00016357	0.00015991			47.1	0.119297	0.0975897	3.9063e-05	7.6904e-05			47.1	0.0212282	2.26048			47.1	0.000557	0.000624			47.1	0.10324	0.242447	0.116706			47.1	0.0893287	0.0117015				47.1	0.107684	0.101395	0.0966436				47.1	0.100308	0.128279
			47.2	0.0904677	0.111594	0.00016357	0.00016113			47.2	0.115294	0.103828	4.1504e-05	7.6904e-05			47.2	0.0194591	2.0721			47.2	0.000558	0.000624			47.2	0.10918	0.237525	0.120296			47.2	0.0921157	0.0127771				47.2	0.106385	0.105078	0.0966436				47.2	0.0989927	0.12502
			47.3	0.0887677	0.111594	0.00016235	0.00015991			47.3	0.108621	0.103828	4.1504e-05	7.6904e-05			47.3	0.0203436	2.16629			47.3	0.000558	0.000624			47.3	0.11215	0.257214	0.118501			47.3	0.0962962	0.010626				47.3	0.110282	0.0977122	0.0908896				47.3	0.101624	0.131538
			47.4	0.0904677	0.111594	0.00016357	0.00015991			47.4	0.109955	0.101749	4.1504e-05	7.8125e-05			47.4	0.0176899	1.88371			47.4	0.000559	0.000625			47.4	0.10918	0.271981	0.120296			47.4	0.0935092	0.0127771				47.4	0.106385	0.101395	0.0952051				47.4	0.100308	0.131538
			47.5	0.0921678	0.113306	0.00016357	0.00016113			47.5	0.117963	0.0975897	4.1504e-05	7.6904e-05			47.5	0.0194591	2.0721			47.5	0.000558	0.000625			47.5	0.11512	0.252292	0.116706			47.5	0.107444	0.0127771				47.5	0.107684	0.0995537	0.0937666				47.5	0.100308	0.129908
			47.6	0.0904677	0.113306	0.00016357	0.00015991			47.6	0.116628	0.0996693	4.1504e-05	7.6904e-05			47.6	0.0212282	2.26048			47.6	0.000558	0.000625			47.6	0.11809	0.267058	0.118501			47.6	0.106051	0.0138526				47.6	0.108983	0.103237	0.0966436				47.6	0.102939	0.133168
			47.7	0.0921678	0.115018	0.00016357	0.00015869			47.7	0.113959	0.0975897	4.1504e-05	7.6904e-05			47.7	0.0212282	2.26048			47.7	0.000559	0.000624			47.7	0.10918	0.262136	0.11491			47.7	0.113018	0.0170791				47.7	0.108983	0.103237	0.0952051				47.7	0.101624	0.129908
			47.8	0.0904677	0.115018	0.00016235	0.00016357			47.8	0.113959	0.0996693	4.2725e-05	7.6904e-05			47.8	0.0185745	1.9779			47.8	0.00056	0.000624			47.8	0.10621	0.257214	0.120296			47.8	0.110231	0.0160036				47.8	0.110282	0.103237	0.098082				47.8	0.104254	0.129908
			47.9	0.0904677	0.118441	0.00016357	0.00016357			47.9	0.117963	0.105908	4.2725e-05	7.6904e-05			47.9	0.0176899	1.88371			47.9	0.000557	0.000625			47.9	0.11809	0.286747	0.120296			47.9	0.111625	0.0138526				47.9	0.110282	0.101395	0.0937666				47.9	0.102939	0.133168
			48	0.0921678	0.113306	0.00016235	0.00016479			48	0.124635	0.105908	4.0283e-05	7.8125e-05			48	0.0168054	1.78952			48	0.000557	0.000625			48	0.11215	0.281825	0.122091			48	0.103264	0.0181546				48	0.110282	0.105078	0.0966436				48	0.10557	0.131538
			48.1	0.0904677	0.118441	0.00016235	0.00016357			48.1	0.121966	0.0975897	4.1504e-05	7.6904e-05			48.1	0.0141517	1.50694			48.1	0.000557	0.000623			48.1	0.10918	0.257214	0.122091			48.1	0.103264	0.0224566				48.1	0.112879	0.0995537	0.0995205				48.1	0.101624	0.136427
			48.2	0.0904677	0.118441	0.00016235	0.00016357			48.2	0.115294	0.0996693	4.1504e-05	7.8125e-05			48.2	0.011498	1.22436			48.2	0.000558	0.000624			48.2	0.12106	0.242447	0.123886			48.2	0.103264	0.0181546				48.2	0.112879	0.105078	0.098082				48.2	0.104254	0.131538
			48.3	0.0904677	0.121865	0.00016357	0.00016357			48.3	0.119297	0.101749	4.1504e-05	7.6904e-05			48.3	0.011498	1.22436			48.3	0.000559	0.000625			48.3	0.11512	0.227681	0.120296			48.3	0.106051	0.0170791				48.3	0.114178	0.101395	0.100959				48.3	0.10557	0.134797
			48.4	0.0887677	0.123577	0.00016235	0.00016479			48.4	0.121966	0.0996693	4.1504e-05	7.8125e-05			48.4	0.011498	1.22436			48.4	0.000559	0.000625			48.4	0.11512	0.237525	0.120296			48.4	0.10187	0.0181546				48.4	0.114178	0.101395	0.098082				48.4	0.104254	0.133168
			48.5	0.0921678	0.120153	0.00016235	0.00016357			48.5	0.120632	0.101749	4.0283e-05	7.6904e-05			48.5	0.00884426	0.94178			48.5	0.000559	0.000625			48.5	0.11809	0.281825	0.122091			48.5	0.104657	0.0192301				48.5	0.115477	0.105078	0.0995205				48.5	0.106885	0.134797
			48.6	0.0887677	0.11673	0.00016235	0.00016113			48.6	0.124635	0.101749	4.1504e-05	7.6904e-05			48.6	0.00972883	1.03597			48.6	0.00056	0.000624			48.6	0.127001	0.286747	0.122091			48.6	0.0976897	0.0203056				48.6	0.115477	0.105078	0.098082				48.6	0.10557	0.138056
			48.7	0.0921678	0.118441	0.00016235	0.00015991			48.7	0.123301	0.0955101	4.1504e-05	7.8125e-05			48.7	0.00884426	0.94178			48.7	0.00056	0.000624			48.7	0.12106	0.267058	0.116706			48.7	0.0935092	0.0192301				48.7	0.115477	0.10692	0.100959				48.7	0.108201	0.138056
			48.8	0.0955679	0.115018	0.00016357	0.00016235			48.8	0.12597	0.101749	4.3945e-05	7.6904e-05			48.8	0.0176899	1.88371			48.8	0.00056	0.000623			48.8	0.11512	0.262136	0.120296			48.8	0.0990832	0.0149281				48.8	0.118075	0.108761	0.098082				48.8	0.108201	0.136427
			48.9	0.0938678	0.11673	0.00016357	0.00016235			48.9	0.129973	0.110067	4.2725e-05	7.8125e-05			48.9	0.0221128	2.35468			48.9	0.00056	0.000623			48.9	0.12106	0.237525	0.123886			48.9	0.100477	0.0192301				48.9	0.116776	0.10692	0.098082				48.9	0.106885	0.141315
			49	0.0904677	0.118441	0.00016235	0.00016235			49	0.124635	0.101749	4.1504e-05	7.6904e-05			49	0.0229973	2.44887			49	0.000562	0.000623			49	0.12106	0.242447	0.120296			49	0.100477	0.0181546				49	0.115477	0.110602	0.103836				49	0.110831	0.136427
			49.1	0.0955679	0.120153	0.00016235	0.00016113			49.1	0.119297	0.101749	4.2725e-05	7.8125e-05			49.1	0.0212282	2.26048			49.1	0.000564	0.000623			49.1	0.11512	0.281825	0.123886			49.1	0.104657	0.0192301				49.1	0.114178	0.108761	0.0995205				49.1	0.108201	0.139686
			49.2	0.0955679	0.118441	0.00016357	0.00016113			49.2	0.121966	0.103828	4.2725e-05	7.6904e-05			49.2	0.0212282	2.26048			49.2	0.000565	0.000624			49.2	0.11809	0.281825	0.131067			49.2	0.106051	0.0224566				49.2	0.115477	0.108761	0.102398				49.2	0.110831	0.138056
			49.3	0.0955679	0.118441	0.00016479	0.00016113			49.3	0.124635	0.105908	4.1504e-05	7.8125e-05			49.3	0.0221128	2.35468			49.3	0.000565	0.000623			49.3	0.12106	0.267058	0.127476			49.3	0.103264	0.0224566				49.3	0.114178	0.10692	0.0995205				49.3	0.10557	0.139686
			49.4	0.098968	0.118441	0.00016235	0.00016113			49.4	0.129973	0.107988	4.0283e-05	7.6904e-05			49.4	0.0221128	2.35468			49.4	0.000566	0.000621			49.4	0.11809	0.257214	0.127476			49.4	0.104657	0.0203056				49.4	0.112879	0.110602	0.103836				49.4	0.106885	0.142945
			49.5	0.098968	0.11673	0.00016357	0.00016113			49.5	0.128639	0.107988	4.0283e-05	7.6904e-05			49.5	0.0247665	2.63726			49.5	0.000568	0.000623			49.5	0.11809	0.242447	0.127476			49.5	0.108838	0.0160036				49.5	0.114178	0.110602	0.105274				49.5	0.108201	0.138056
			49.6	0.098968	0.120153	0.00016357	0.00015991			49.6	0.12597	0.101749	4.2725e-05	7.8125e-05			49.6	0.0238819	2.54306			49.6	0.000571	0.000623			49.6	0.12106	0.257214	0.123886			49.6	0.103264	0.0149281				49.6	0.112879	0.110602	0.103836				49.6	0.110831	0.141315
			49.7	0.097268	0.125288	0.00016357	0.00015991			49.7	0.129973	0.103828	4.2725e-05	7.6904e-05			49.7	0.0229973	2.44887			49.7	0.000573	0.000623			49.7	0.12106	0.262136	0.123886			49.7	0.103264	0.0181546				49.7	0.114178	0.105078	0.106713				49.7	0.109516	0.144575
			49.8	0.097268	0.121865	0.00016357	0.00016113			49.8	0.129973	0.101749	4.2725e-05	7.6904e-05			49.8	0.0176899	1.88371			49.8	0.000575	0.000621			49.8	0.12106	0.286747	0.123886			49.8	0.106051	0.0181546				49.8	0.112879	0.110602	0.100959				49.8	0.108201	0.144575
			49.9	0.100668	0.125288	0.00016479	0.00016113			49.9	0.127304	0.0996693	4.2725e-05	7.8125e-05			49.9	0.0159208	1.69533			49.9	0.000575	0.000623			49.9	0.124031	0.257214	0.127476			49.9	0.103264	0.0213811				49.9	0.112879	0.105078	0.106713				49.9	0.110831	0.147834
			50	0.098968	0.125288	0.00016235	0.00015991			50	0.129973	0.101749	4.2725e-05	7.8125e-05			50	0.0185745	1.9779			50	0.000579	0.000623			50	0.129971	0.242447	0.127476			50	0.104657	0.0203056				50	0.116776	0.110602	0.103836				50	0.108201	0.142945
			50.1	0.097268	0.125288	0.00016357	0.00015869			50.1	0.129973	0.107988	4.2725e-05	7.8125e-05			50.1	0.0203436	2.16629			50.1	0.000579	0.000621			50.1	0.12106	0.252292	0.125681			50.1	0.106051	0.0192301				50.1	0.115477	0.108761	0.105274				50.1	0.110831	0.146204
			50.2	0.097268	0.121865	0.00016479	0.00016113			50.2	0.128639	0.110067	4.2725e-05	7.9346e-05			50.2	0.0203436	2.16629			50.2	0.000582	0.000623			50.2	0.11809	0.24737	0.127476			50.2	0.107444	0.0213811				50.2	0.116776	0.110602	0.100959				50.2	0.112147	0.147834
			50.3	0.097268	0.121865	0.00016357	0.00016113			50.3	0.133977	0.107988	4.3945e-05	7.8125e-05			50.3	0.0203436	2.16629			50.3	0.000585	0.000623			50.3	0.12106	0.257214	0.129272			50.3	0.107444	0.0203056				50.3	0.112879	0.110602	0.103836				50.3	0.109516	0.142945
			50.4	0.098968	0.120153	0.00016357	0.00016113			50.4	0.132643	0.110067	4.1504e-05	7.9346e-05			50.4	0.0212282	2.26048			50.4	0.000586	0.000623			50.4	0.124031	0.267058	0.132862			50.4	0.108838	0.0192301				50.4	0.115477	0.114285	0.103836				50.4	0.110831	0.147834
			50.5	0.0955679	0.121865	0.00016479	0.00016235			50.5	0.129973	0.124624	4.2725e-05	7.9346e-05			50.5	0.0212282	2.26048			50.5	0.00059	0.000623			50.5	0.11809	0.237525	0.131067			50.5	0.106051	0.0138526				50.5	0.112879	0.116127	0.103836				50.5	0.106885	0.144575
			50.6	0.098968	0.121865	0.00016479	0.00016235			50.6	0.128639	0.132942	4.3945e-05	7.8125e-05			50.6	0.0238819	2.54306			50.6	0.00059	0.000623			50.6	0.10918	0.252292	0.129272			50.6	0.108838	0.0149281				50.6	0.114178	0.116127	0.10959				50.6	0.109516	0.147834
			50.7	0.100668	0.123577	0.00016357	0.00016113			50.7	0.133977	0.139181	4.3945e-05	7.9346e-05			50.7	0.0238819	2.54306			50.7	0.000591	0.000624			50.7	0.11215	0.237525	0.125681			50.7	0.111625	0.0160036				50.7	0.114178	0.116127	0.105274				50.7	0.110831	0.151093
			50.8	0.098968	0.125288	0.00016479	0.00016235			50.8	0.133977	0.110067	4.2725e-05	7.8125e-05			50.8	0.0221128	2.35468			50.8	0.000593	0.000623			50.8	0.10621	0.271981	0.131067			50.8	0.113018	0.0192301				50.8	0.116776	0.114285	0.10959				50.8	0.110831	0.144575
			50.9	0.0955679	0.127	0.00016602	0.00016357			50.9	0.128639	0.107988	4.3945e-05	7.8125e-05			50.9	0.0221128	2.35468			50.9	0.000593	0.000623			50.9	0.11512	0.267058	0.127476			50.9	0.110231	0.0203056				50.9	0.118075	0.11981	0.106713				50.9	0.113462	0.149463
			51	0.102368	0.125288	0.00016479	0.00016235			51	0.12597	0.110067	4.3945e-05	7.8125e-05			51	0.0229973	2.44887			51	0.000596	0.000625			51	0.138881	0.262136	0.131067			51	0.110231	0.0203056				51	0.114178	0.121651	0.106713				51	0.109516	0.147834
			51.1	0.102368	0.128712	0.00016479	0.00016235			51.1	0.128639	0.105908	4.2725e-05	7.8125e-05			51.1	0.0229973	2.44887			51.1	0.000598	0.000624			51.1	0.132941	0.267058	0.132862			51.1	0.114412	0.0203056				51.1	0.11158	0.117968	0.10959				51.1	0.116093	0.147834
			51.2	0.102368	0.130424	0.00016602	0.00016235			51.2	0.132643	0.101749	4.2725e-05	7.8125e-05			51.2	0.0238819	2.54306			51.2	0.000599	0.000624			51.2	0.132941	0.252292	0.136452			51.2	0.108838	0.0160036				51.2	0.116776	0.116127	0.10959				51.2	0.112147	0.154352
			51.3	0.105768	0.125288	0.00016357	0.00016479			51.3	0.132643	0.107988	4.2725e-05	7.9346e-05			51.3	0.0212282	2.26048			51.3	0.000602	0.000625			51.3	0.141851	0.257214	0.132862			51.3	0.108838	0.00847501				51.3	0.118075	0.121651	0.111028				51.3	0.112147	0.149463
			51.4	0.107468	0.123577	0.00016479	0.00016357			51.4	0.129973	0.112147	4.3945e-05	8.0566e-05			51.4	0.0194591	2.0721			51.4	0.000605	0.000626			51.4	0.147791	0.267058	0.132862			51.4	0.110231	0.00309747				51.4	0.116776	0.114285	0.108151				51.4	0.116093	0.151093
			51.5	0.104068	0.123577	0.00016602	0.00016357			51.5	0.120632	0.122544	4.3945e-05	7.9346e-05			51.5	0.0194591	2.0721			51.5	0.000605	0.000626			51.5	0.138881	0.271981	0.127476			51.5	0.111625	0.00417298				51.5	0.115477	0.123493	0.111028				51.5	0.113462	0.149463
			51.6	0.105768	0.121865	0.00016602	0.00016235			51.6	0.117963	0.122544	4.1504e-05	7.9346e-05			51.6	0.0247665	2.63726			51.6	0.000607	0.000625			51.6	0.138881	0.262136	0.127476			51.6	0.114412	0.0138526				51.6	0.118075	0.117968	0.111028				51.6	0.113462	0.151093
			51.7	0.104068	0.127	0.00016479	0.00015991			51.7	0.123301	0.120465	4.2725e-05	7.9346e-05			51.7	0.0229973	2.44887			51.7	0.000608	0.000624			51.7	0.135911	0.262136	0.129272			51.7	0.113018	0.0149281				51.7	0.115477	0.121651	0.115344				51.7	0.113462	0.155981
			51.8	0.105768	0.127	0.00016479	0.00015991			51.8	0.127304	0.124624	4.2725e-05	7.9346e-05			51.8	0.0238819	2.54306			51.8	0.00061	0.000626			51.8	0.127001	0.257214	0.131067			51.8	0.108838	0.0127771				51.8	0.118075	0.117968	0.112467				51.8	0.116093	0.152722
			51.9	0.107468	0.123577	0.00016602	0.00016235			51.9	0.124635	0.128783	4.2725e-05	7.9346e-05			51.9	0.0300739	3.20241			51.9	0.000612	0.000625			51.9	0.127001	0.257214	0.132862			51.9	0.107444	0.00955052				51.9	0.119374	0.123493	0.113905				51.9	0.114778	0.152722
			52	0.104068	0.127	0.00016479	0.00016479			52	0.123301	0.126704	4.2725e-05	7.9346e-05			52	0.0327276	3.48499			52	0.000613	0.000625			52	0.129971	0.291669	0.132862			52	0.107444	0.006324				52	0.116776	0.121651	0.113905				52	0.116093	0.155981
			52.1	0.104068	0.128712	0.00016479	0.00016357			52.1	0.124635	0.122544	4.1504e-05	7.9346e-05			52.1	0.0327276	3.48499			52.1	0.000613	0.000626			52.1	0.135911	0.281825	0.132862			52.1	0.111625	0.0117015				52.1	0.119374	0.125334	0.112467				52.1	0.116093	0.147834
			52.2	0.100668	0.127	0.00016479	0.00016113			52.2	0.124635	0.120465	4.2725e-05	7.9346e-05			52.2	0.0336121	3.57919			52.2	0.000614	0.000625			52.2	0.124031	0.252292	0.136452			52.2	0.115805	0.0138526				52.2	0.116776	0.11981	0.113905				52.2	0.116093	0.152722
			52.3	0.102368	0.128712	0.00016602	0.00016235			52.3	0.124635	0.114226	4.2725e-05	7.9346e-05			52.3	0.0309584	3.29661			52.3	0.000615	0.000627			52.3	0.12106	0.232603	0.136452			52.3	0.114412	0.0117015				52.3	0.116776	0.125334	0.112467				52.3	0.118724	0.155981
			52.4	0.102368	0.133847	0.00016602	0.00016235			52.4	0.124635	0.116306	4.2725e-05	7.9346e-05			52.4	0.0221128	2.35468			52.4	0.000618	0.000626			52.4	0.132941	0.237525	0.132862			52.4	0.111625	0.0138526				52.4	0.118075	0.121651	0.116782				52.4	0.116093	0.154352
			52.5	0.100668	0.132136	0.00016602	0.00016113			52.5	0.12597	0.116306	4.2725e-05	7.9346e-05			52.5	0.0203436	2.16629			52.5	0.000618	0.000624			52.5	0.127001	0.252292	0.132862			52.5	0.110231	0.0160036				52.5	0.116776	0.127176	0.118221				52.5	0.116093	0.155981
			52.6	0.098968	0.132136	0.00016479	0.00015991			52.6	0.12597	0.122544	4.2725e-05	7.9346e-05			52.6	0.0212282	2.26048			52.6	0.000619	0.000624			52.6	0.132941	0.271981	0.132862			52.6	0.111625	0.010626				52.6	0.114178	0.121651	0.116782				52.6	0.118724	0.152722
			52.7	0.098968	0.132136	0.00016479	0.00016113			52.7	0.124635	0.120465	4.3945e-05	7.9346e-05			52.7	0.025651	2.73145			52.7	0.000619	0.000625			52.7	0.138881	0.262136	0.131067			52.7	0.111625	0.0138526				52.7	0.115477	0.127176	0.116782				52.7	0.117408	0.152722
			52.8	0.102368	0.128712	0.00016602	0.00016235			52.8	0.128639	0.116306	4.1504e-05	7.8125e-05			52.8	0.025651	2.73145			52.8	0.000621	0.000626			52.8	0.141851	0.271981	0.131067			52.8	0.111625	0.0160036				52.8	0.115477	0.123493	0.115344				52.8	0.121355	0.155981
			52.9	0.104068	0.128712	0.00016602	0.00016235			52.9	0.129973	0.116306	4.2725e-05	7.8125e-05			52.9	0.0238819	2.54306			52.9	0.000621	0.000625			52.9	0.141851	0.271981	0.136452			52.9	0.113018	0.0117015				52.9	0.116776	0.125334	0.116782				52.9	0.121355	0.152722
			53	0.102368	0.125288	0.00016602	0.00016113			53	0.128639	0.116306	4.2725e-05	7.8125e-05			53	0.025651	2.73145			53	0.000624	0.000624			53	0.144821	0.267058	0.136452			53	0.110231	0.0127771				53	0.115477	0.11981	0.115344				53	0.118724	0.155981
			53.1	0.100668	0.128712	0.00016724	0.00016235			53.1	0.12597	0.124624	4.2725e-05	7.9346e-05			53.1	0.0283047	3.01403			53.1	0.000624	0.000624			53.1	0.150761	0.262136	0.136452			53.1	0.111625	0.010626				53.1	0.119374	0.129017	0.118221				53.1	0.120039	0.154352
			53.2	0.100668	0.127	0.00016602	0.00016357			53.2	0.12597	0.126704	4.2725e-05	7.9346e-05			53.2	0.0309584	3.29661			53.2	0.000625	0.000626			53.2	0.147791	0.286747	0.138247			53.2	0.113018	0.0138526				53.2	0.120673	0.125334	0.119659				53.2	0.118724	0.157611
			53.3	0.097268	0.133847	0.00016479	0.00016357			53.3	0.128639	0.124624	4.2725e-05	8.0566e-05			53.3	0.0300739	3.20241			53.3	0.000629	0.000626			53.3	0.144821	0.267058	0.136452			53.3	0.115805	0.0149281				53.3	0.120673	0.127176	0.115344				53.3	0.121355	0.16087
			53.4	0.098968	0.130424	0.00016357	0.00016235			53.4	0.131308	0.120465	4.2725e-05	7.8125e-05			53.4	0.0283047	3.01403			53.4	0.00063	0.000626			53.4	0.144821	0.267058	0.132862			53.4	0.113018	0.0138526				53.4	0.120673	0.129017	0.118221				53.4	0.120039	0.155981
			53.5	0.100668	0.132136	0.00016479	0.00016235			53.5	0.128639	0.120465	4.3945e-05	7.9346e-05			53.5	0.0274202	2.91984			53.5	0.000629	0.000624			53.5	0.138881	0.262136	0.134657			53.5	0.117199	0.0138526				53.5	0.120673	0.129017	0.116782				53.5	0.123986	0.16087
			53.6	0.104068	0.133847	0.00016479	0.00016113			53.6	0.128639	0.122544	4.2725e-05	7.9346e-05			53.6	0.0274202	2.91984			53.6	0.000632	0.000624			53.6	0.135911	0.276903	0.138247			53.6	0.114412	0.0127771				53.6	0.118075	0.123493	0.119659				53.6	0.120039	0.1625
			53.7	0.104068	0.132136	0.00016479	0.00016357			53.7	0.12597	0.126704	4.2725e-05	7.9346e-05			53.7	0.0327276	3.48499			53.7	0.000632	0.000625			53.7	0.141851	0.291669	0.134657			53.7	0.115805	0.0138526				53.7	0.120673	0.127176	0.118221				53.7	0.121355	0.16087
			53.8	0.104068	0.132136	0.00016479	0.00016235			53.8	0.127304	0.126704	4.1504e-05	7.9346e-05			53.8	0.0327276	3.48499			53.8	0.000631	0.000624			53.8	0.144821	0.296591	0.136452			53.8	0.114412	0.0127771				53.8	0.118075	0.1327	0.119659				53.8	0.125301	0.16087
			53.9	0.102368	0.133847	0.00016479	0.00016235			53.9	0.132643	0.126704	4.1504e-05	8.0566e-05			53.9	0.0300739	3.20241			53.9	0.000634	0.000625			53.9	0.144821	0.281825	0.138247			53.9	0.115805	0.0127771				53.9	0.120673	0.130858	0.115344				53.9	0.120039	0.16087
			54	0.105768	0.132136	0.00016479	0.00016235			54	0.132643	0.130863	4.2725e-05	8.0566e-05			54	0.0300739	3.20241			54	0.000634	0.000625			54	0.138881	0.267058	0.138247			54	0.117199	0.0192301				54	0.119374	0.130858	0.122536				54	0.125301	0.157611
			54.1	0.105768	0.128712	0.00016602	0.00016357			54.1	0.128639	0.135022	4.3945e-05	8.1787e-05			54.1	0.0283047	3.01403			54.1	0.000635	0.000626			54.1	0.153731	0.262136	0.141838			54.1	0.117199	0.0203056				54.1	0.119374	0.130858	0.119659				54.1	0.12267	0.164129
			54.2	0.105768	0.130424	0.00016479	0.00016357			54.2	0.131308	0.130863	4.7607e-05	7.9346e-05			54.2	0.0300739	3.20241			54.2	0.000635	0.000625			54.2	0.153731	0.281825	0.141838			54.2	0.122773	0.0160036				54.2	0.116776	0.1327	0.122536				54.2	0.12267	0.157611
			54.3	0.105768	0.132136	0.00016602	0.00016235			54.3	0.132643	0.135022	4.7607e-05	8.0566e-05			54.3	0.0309584	3.29661			54.3	0.000636	0.000625			54.3	0.150761	0.291669	0.138247			54.3	0.122773	0.0170791				54.3	0.118075	0.129017	0.123975				54.3	0.125301	0.16087
			54.4	0.104068	0.132136	0.00016479	0.00016235			54.4	0.132643	0.128783	4.8828e-05	8.1787e-05			54.4	0.0300739	3.20241			54.4	0.000636	0.000624			54.4	0.153731	0.296591	0.138247			54.4	0.12556	0.0170791				54.4	0.118075	0.130858	0.123975				54.4	0.125301	0.1625
			54.5	0.102368	0.130424	0.00016602	0.00016357			54.5	0.135312	0.122544	4.8828e-05	8.0566e-05			54.5	0.0291893	3.10822			54.5	0.000638	0.000625			54.5	0.153731	0.276903	0.140043			54.5	0.12556	0.0170791				54.5	0.119374	0.127176	0.12829				54.5	0.126616	0.159241
			54.6	0.100668	0.132136	0.00016602	0.00016235			54.6	0.132643	0.118385	4.8828e-05	8.0566e-05			54.6	0.0291893	3.10822			54.6	0.000638	0.000627			54.6	0.150761	0.267058	0.140043			54.6	0.126953	0.0203056				54.6	0.119374	0.1327	0.122536				54.6	0.123986	0.1625
			54.7	0.107468	0.130424	0.00016479	0.00016113			54.7	0.132643	0.120465	4.7607e-05	8.0566e-05			54.7	0.0291893	3.10822			54.7	0.000638	0.000624			54.7	0.147791	0.276903	0.145428			54.7	0.132527	0.0181546				54.7	0.120673	0.129017	0.119659				54.7	0.126616	0.1625
			54.8	0.105768	0.135559	0.00016602	0.00016235			54.8	0.131308	0.120465	4.3945e-05	8.0566e-05			54.8	0.0291893	3.10822			54.8	0.00064	0.000625			54.8	0.156701	0.291669	0.145428			54.8	0.136708	0.0170791				54.8	0.116776	0.130858	0.115344				54.8	0.123986	0.164129
			54.9	0.107468	0.135559	0.00016602	0.00016235			54.9	0.131308	0.120465	4.2725e-05	8.0566e-05			54.9	0.0309584	3.29661			54.9	0.000641	0.000625			54.9	0.156701	0.306436	0.143633			54.9	0.139495	0.0160036				54.9	0.120673	0.130858	0.122536				54.9	0.12267	0.169018
			55	0.105768	0.135559	0.00016602	0.00016357			55	0.136646	0.126704	4.2725e-05	8.0566e-05			55	0.0300739	3.20241			55	0.000641	0.000625			55	0.153731	0.286747	0.145428			55	0.136708	0.0181546				55	0.118075	0.134541	0.121098				55	0.127932	0.164129
			55.1	0.105768	0.135559	0.00016479	0.00016235			55.1	0.135312	0.124624	4.3945e-05	8.0566e-05			55.1	0.0300739	3.20241			55.1	0.000641	0.000625			55.1	0.156701	0.257214	0.147223			55.1	0.12974	0.0160036				55.1	0.118075	0.130858	0.118221				55.1	0.123986	0.1625
			55.2	0.107468	0.135559	0.00016602	0.00016357			55.2	0.133977	0.130863	4.1504e-05	8.0566e-05			55.2	0.0309584	3.29661			55.2	0.000642	0.000625			55.2	0.162642	0.242447	0.149018			55.2	0.12556	0.0181546				55.2	0.116776	0.1327	0.122536				55.2	0.127932	0.165759
			55.3	0.107468	0.132136	0.00016602	0.00016357			55.3	0.133977	0.135022	4.2725e-05	8.0566e-05			55.3	0.0309584	3.29661			55.3	0.000641	0.000626			55.3	0.150761	0.257214	0.149018			55.3	0.126953	0.0213811				55.3	0.118075	0.130858	0.118221				55.3	0.123986	0.16087
			55.4	0.107468	0.128712	0.00016724	0.00016357			55.4	0.135312	0.132942	4.2725e-05	8.1787e-05			55.4	0.0336121	3.57919			55.4	0.000642	0.000626			55.4	0.147791	0.286747	0.150813			55.4	0.12974	0.0235321				55.4	0.116776	0.134541	0.123975				55.4	0.126616	0.165759
			55.5	0.107468	0.128712	0.00016602	0.00016357			55.5	0.139315	0.128783	4.2725e-05	8.0566e-05			55.5	0.031843	3.3908			55.5	0.000642	0.000626			55.5	0.159672	0.296591	0.150813			55.5	0.133921	0.0192301				55.5	0.116776	0.134541	0.121098				55.5	0.125301	0.165759
			55.6	0.112569	0.128712	0.00016602	0.00016113			55.6	0.137981	0.126704	4.1504e-05	8.0566e-05			55.6	0.0309584	3.29661			55.6	0.000642	0.000625			55.6	0.141851	0.276903	0.147223			55.6	0.12974	0.0160036				55.6	0.115477	0.138224	0.119659				55.6	0.126616	0.164129
			55.7	0.112569	0.132136	0.00016602	0.00016357			55.7	0.144653	0.130863	4.1504e-05	8.1787e-05			55.7	0.0274202	2.91984			55.7	0.000643	0.000625			55.7	0.141851	0.262136	0.149018			55.7	0.12974	0.0170791				55.7	0.115477	0.130858	0.122536				55.7	0.130563	0.167388
			55.8	0.110868	0.133847	0.00016602	0.00016479			55.8	0.137981	0.132942	4.2725e-05	8.0566e-05			55.8	0.0265356	2.82564			55.8	0.000645	0.000625			55.8	0.144821	0.267058	0.147223			55.8	0.12974	0.0181546				55.8	0.116776	0.134541	0.121098				55.8	0.125301	0.16087
			55.9	0.110868	0.133847	0.00016724	0.00016357			55.9	0.132643	0.135022	4.1504e-05	8.1787e-05			55.9	0.0283047	3.01403			55.9	0.000645	0.000626			55.9	0.147791	0.267058	0.143633			55.9	0.12974	0.0235321				55.9	0.119374	0.136383	0.118221				55.9	0.129247	0.165759
			56	0.114269	0.138983	0.00016602	0.00016357			56	0.131308	0.132942	4.1504e-05	8.1787e-05			56	0.0265356	2.82564			56	0.000647	0.000625			56	0.132941	0.281825	0.147223			56	0.131134	0.0224566				56	0.115477	0.1327	0.119659				56	0.129247	0.170647
			56.1	0.112569	0.138983	0.00016602	0.00016235			56.1	0.131308	0.132942	4.2725e-05	8.1787e-05			56.1	0.025651	2.73145			56.1	0.000646	0.000626			56.1	0.144821	0.276903	0.147223			56.1	0.135314	0.0256832				56.1	0.116776	0.134541	0.119659				56.1	0.129247	0.165759
			56.2	0.112569	0.138983	0.00016602	0.00016479			56.2	0.137981	0.135022	4.2725e-05	8.1787e-05			56.2	0.0291893	3.10822			56.2	0.000646	0.000626			56.2	0.150761	0.276903	0.150813			56.2	0.135314	0.0246077				56.2	0.118075	0.138224	0.116782				56.2	0.129247	0.170647
			56.3	0.110868	0.137271	0.00016602	0.00016479			56.3	0.135312	0.135022	4.2725e-05	8.1787e-05			56.3	0.0291893	3.10822			56.3	0.000647	0.000626			56.3	0.147791	0.286747	0.150813			56.3	0.131134	0.0235321				56.3	0.120673	0.134541	0.123975				56.3	0.130563	0.170647
			56.4	0.109168	0.138983	0.00016602	0.00016235			56.4	0.137981	0.141261	4.1504e-05	8.0566e-05			56.4	0.0291893	3.10822			56.4	0.000648	0.000626			56.4	0.147791	0.267058	0.154404			56.4	0.132527	0.0192301				56.4	0.120673	0.136383	0.122536				56.4	0.133193	0.165759
			56.5	0.115969	0.137271	0.00016724	0.00016357			56.5	0.132643	0.141261	4.1504e-05	8.1787e-05			56.5	0.0229973	2.44887			56.5	0.000648	0.000627			56.5	0.153731	0.252292	0.156199			56.5	0.133921	0.0192301				56.5	0.120673	0.138224	0.121098				56.5	0.130563	0.167388
			56.6	0.114269	0.132136	0.00016602	0.00016235			56.6	0.135312	0.135022	4.2725e-05	8.0566e-05			56.6	0.0194591	2.0721			56.6	0.000651	0.000626			56.6	0.141851	0.257214	0.152609			56.6	0.132527	0.0203056				56.6	0.120673	0.136383	0.121098				56.6	0.133193	0.167388
			56.7	0.117669	0.133847	0.00016724	0.00016357			56.7	0.133977	0.132942	4.2725e-05	8.1787e-05			56.7	0.0185745	1.9779			56.7	0.000649	0.000625			56.7	0.144821	0.276903	0.152609			56.7	0.136708	0.0203056				56.7	0.119374	0.136383	0.122536				56.7	0.130563	0.169018
			56.8	0.117669	0.137271	0.00016724	0.00016479			56.8	0.141984	0.135022	4.1504e-05	8.1787e-05			56.8	0.0194591	2.0721			56.8	0.000649	0.000627			56.8	0.150761	0.306436	0.150813			56.8	0.133921	0.0224566				56.8	0.119374	0.138224	0.126852				56.8	0.130563	0.167388
			56.9	0.117669	0.137271	0.00016602	0.00016235			56.9	0.14065	0.135022	4.1504e-05	8.1787e-05			56.9	0.0203436	2.16629			56.9	0.000649	0.000626			56.9	0.150761	0.267058	0.152609			56.9	0.132527	0.0246077				56.9	0.120673	0.140066	0.123975				56.9	0.133193	0.170647
			57	0.117669	0.135559	0.00016724	0.00016235			57	0.136646	0.132942	4.1504e-05	8.1787e-05			57	0.0221128	2.35468			57	0.000652	0.000626			57	0.147791	0.252292	0.152609			57	0.12974	0.0235321				57	0.119374	0.141907	0.12829				57	0.130563	0.173907
			57.1	0.119369	0.137271	0.00016846	0.00016479			57.1	0.136646	0.135022	4.2725e-05	8.0566e-05			57.1	0.0203436	2.16629			57.1	0.000652	0.000626			57.1	0.150761	0.267058	0.150813			57.1	0.132527	0.0213811				57.1	0.120673	0.140066	0.123975				57.1	0.133193	0.167388
			57.2	0.115969	0.137271	0.00016602	0.00016235			57.2	0.136646	0.132942	4.2725e-05	8.0566e-05			57.2	0.0185745	1.9779			57.2	0.000653	0.000626			57.2	0.147791	0.257214	0.152609			57.2	0.132527	0.0213811				57.2	0.120673	0.136383	0.12829				57.2	0.131878	0.172277
			57.3	0.119369	0.138983	0.00016602	0.00016235			57.3	0.141984	0.135022	4.2725e-05	7.9346e-05			57.3	0.0185745	1.9779			57.3	0.000654	0.000625			57.3	0.144821	0.276903	0.156199			57.3	0.139495	0.0203056				57.3	0.115477	0.140066	0.132606				57.3	0.133193	0.172277
			57.4	0.119369	0.140694	0.00016479	0.00016357			57.4	0.141984	0.135022	4.1504e-05	7.9346e-05			57.4	0.0238819	2.54306			57.4	0.000653	0.000626			57.4	0.144821	0.291669	0.156199			57.4	0.143675	0.0224566				57.4	0.118075	0.138224	0.134044				57.4	0.133193	0.169018
			57.5	0.119369	0.137271	0.00016724	0.00016235			57.5	0.139315	0.135022	4.1504e-05	8.0566e-05			57.5	0.025651	2.73145			57.5	0.000656	0.000626			57.5	0.153731	0.267058	0.156199			57.5	0.139495	0.0213811				57.5	0.116776	0.141907	0.13836				57.5	0.131878	0.170647
			57.6	0.119369	0.140694	0.00016724	0.00016357			57.6	0.139315	0.135022	4.2725e-05	8.0566e-05			57.6	0.0229973	2.44887			57.6	0.000656	0.000626			57.6	0.147791	0.262136	0.156199			57.6	0.135314	0.0213811				57.6	0.128466	0.140066	0.134044				57.6	0.135824	0.169018
			57.7	0.119369	0.142406	0.00016724	0.00016357			57.7	0.14065	0.141261	4.1504e-05	8.0566e-05			57.7	0.0229973	2.44887			57.7	0.000656	0.000626			57.7	0.138881	0.257214	0.154404			57.7	0.133921	0.0224566				57.7	0.128466	0.143749	0.134044				57.7	0.133193	0.169018
			57.8	0.117669	0.137271	0.00016602	0.00016479			57.8	0.141984	0.137101	4.2725e-05	8.0566e-05			57.8	0.0238819	2.54306			57.8	0.000656	0.000626			57.8	0.141851	0.271981	0.150813			57.8	0.133921	0.0235321				57.8	0.124569	0.140066	0.129729				57.8	0.135824	0.175536
			57.9	0.121069	0.137271	0.00016602	0.00016479			57.9	0.14065	0.132942	4.2725e-05	8.0566e-05			57.9	0.0274202	2.91984			57.9	0.000656	0.000626			57.9	0.144821	0.296591	0.152609			57.9	0.131134	0.0224566				57.9	0.114178	0.141907	0.131167				57.9	0.133193	0.172277
			58	0.119369	0.135559	0.00016724	0.00016479			58	0.141984	0.137101	4.2725e-05	8.0566e-05			58	0.025651	2.73145			58	0.000657	0.000627			58	0.141851	0.301514	0.154404			58	0.136708	0.0224566				58	0.102488	0.141907	0.129729				58	0.135824	0.173907
			58.1	0.119369	0.137271	0.00016602	0.00016479			58.1	0.139315	0.135022	4.2725e-05	7.9346e-05			58.1	0.0238819	2.54306			58.1	0.000657	0.000629			58.1	0.147791	0.271981	0.154404			58.1	0.138101	0.0246077				58.1	0.144053	0.147432	0.132606				58.1	0.139771	0.173907
			58.2	0.117669	0.137271	0.00016602	0.00016235			58.2	0.14065	0.137101	4.1504e-05	7.9346e-05			58.2	0.0212282	2.26048			58.2	0.000657	0.000627			58.2	0.153731	0.276903	0.156199			58.2	0.131134	0.0256832				58.2	0.202503	0.147432	0.129729				58.2	0.135824	0.170647
			58.3	0.121069	0.137271	0.00016602	0.00016724			58.3	0.141984	0.135022	4.1504e-05	7.9346e-05			58.3	0.0229973	2.44887			58.3	0.000656	0.000626			58.3	0.150761	0.267058	0.154404			58.3	0.138101	0.0267587				58.3	0.262252	0.147432	0.129729				58.3	0.138455	0.173907
			58.4	0.119369	0.138983	0.00016479	0.00016602			58.4	0.14065	0.132942	4.2725e-05	8.0566e-05			58.4	0.0247665	2.63726			58.4	0.000657	0.000627			58.4	0.153731	0.286747	0.157994			58.4	0.142282	0.0278342				58.4	0.447995	0.14559	0.129729				58.4	0.13714	0.173907
			58.5	0.119369	0.142406	0.00016479	0.00016357			58.5	0.137981	0.139181	4.1504e-05	8.0566e-05			58.5	0.025651	2.73145			58.5	0.000659	0.000626			58.5	0.147791	0.311358	0.154404			58.5	0.146462	0.0267587				58.5	0.625944	0.149273	0.129729				58.5	0.13714	0.173907
			58.6	0.121069	0.142406	0.00016602	0.00016113			58.6	0.148657	0.139181	4.0283e-05	8.0566e-05			58.6	0.025651	2.73145			58.6	0.000658	0.000627			58.6	0.159672	0.301514	0.161584			58.6	0.152036	0.0289097				58.6	0.767523	0.151115	0.135483				58.6	0.135824	0.177166
			58.7	0.119369	0.140694	0.00016479	0.00016479			58.7	0.151326	0.147499	4.1504e-05	8.0566e-05			58.7	0.0238819	2.54306			58.7	0.000657	0.000627			58.7	0.147791	0.267058	0.159789			58.7	0.147856	0.0267587				58.7	0.867538	0.152956	0.131167				58.7	0.135824	0.172277
			58.8	0.119369	0.142406	0.00016724	0.00016479			58.8	0.149992	0.14542	4.2725e-05	8.0566e-05			58.8	0.0238819	2.54306			58.8	0.000658	0.000626			58.8	0.156701	0.262136	0.157994			58.8	0.145069	0.0256832				58.8	0.906505	0.149273	0.135483				58.8	0.139771	0.175536
			58.9	0.117669	0.140694	0.00016724	0.00016602			58.9	0.149992	0.147499	4.2725e-05	8.1787e-05			58.9	0.0265356	2.82564			58.9	0.000659	0.000629			58.9	0.162642	0.281825	0.157994			58.9	0.136708	0.0267587				58.9	0.916896	0.152956	0.135483				58.9	0.13714	0.177166
			59	0.119369	0.142406	0.00016602	0.00016479			59	0.145988	0.14542	4.1504e-05	8.0566e-05			59	0.0274202	2.91984			59	0.000659	0.000629			59	0.153731	0.301514	0.154404			59	0.135314	0.0278342				59	0.929885	0.151115	0.131167				59	0.141086	0.173907
			59.1	0.121069	0.140694	0.00016602	0.00016724			59.1	0.149992	0.14542	4.2725e-05	8.0566e-05			59.1	0.0247665	2.63726			59.1	0.00066	0.000626			59.1	0.144821	0.31628	0.156199			59.1	0.133921	0.0299852				59.1	0.933782	0.147432	0.135483				59.1	0.13714	0.175536
			59.2	0.121069	0.142406	0.00016479	0.00016479			59.2	0.148657	0.14542	4.2725e-05	8.1787e-05			59.2	0.0238819	2.54306			59.2	0.00066	0.000626			59.2	0.159672	0.296591	0.156199			59.2	0.136708	0.0321362				59.2	0.93638	0.154797	0.134044				59.2	0.134509	0.175536
			59.3	0.119369	0.14583	0.00016724	0.00016113			59.3	0.153995	0.14542	4.3945e-05	8.1787e-05			59.3	0.0247665	2.63726			59.3	0.000659	0.000627			59.3	0.162642	0.276903	0.159789			59.3	0.139495	0.0299852				59.3	0.944173	0.149273	0.13836				59.3	0.138455	0.175536
			59.4	0.117669	0.142406	0.00016602	0.00016602			59.4	0.152661	0.139181	4.2725e-05	8.3008e-05			59.4	0.0238819	2.54306			59.4	0.000662	0.000627			59.4	0.159672	0.271981	0.157994			59.4	0.135314	0.0278342				59.4	0.946771	0.152956	0.131167				59.4	0.138455	0.180425
			59.5	0.117669	0.140694	0.00016479	0.00016357			59.5	0.151326	0.141261	4.1504e-05	8.1787e-05			59.5	0.0247665	2.63726			59.5	0.000662	0.000629			59.5	0.153731	0.281825	0.163379			59.5	0.132527	0.0278342				59.5	0.94807	0.151115	0.132606				59.5	0.142401	0.172277
			59.6	0.117669	0.138983	0.00016724	0.00016357			59.6	0.148657	0.139181	4.1504e-05	8.3008e-05			59.6	0.0212282	2.26048			59.6	0.000662	0.000629			59.6	0.165612	0.311358	0.165175			59.6	0.132527	0.0278342				59.6	0.946771	0.151115	0.131167				59.6	0.139771	0.173907
			59.7	0.117669	0.137271	0.00016602	0.00016602			59.7	0.148657	0.14334	4.2725e-05	8.3008e-05			59.7	0.0229973	2.44887			59.7	0.000662	0.000629			59.7	0.153731	0.306436	0.163379			59.7	0.135314	0.0256832				59.7	0.951967	0.151115	0.129729				59.7	0.141086	0.178795
			59.8	0.119369	0.137271	0.00016602	0.00016724			59.8	0.15533	0.147499	4.2725e-05	8.3008e-05			59.8	0.025651	2.73145			59.8	0.000662	0.000627			59.8	0.156701	0.281825	0.163379			59.8	0.133921	0.0289097				59.8	0.951967	0.149273	0.132606				59.8	0.138455	0.178795
			59.9	0.121069	0.137271	0.00016602	0.00016479			59.9	0.156664	0.157897	4.1504e-05	8.1787e-05			59.9	0.0265356	2.82564			59.9	0.000662	0.000627			59.9	0.159672	0.276903	0.159789			59.9	0.138101	0.0310607				59.9	0.957162	0.149273	0.131167				59.9	0.142401	0.177166
			60	0.119369	0.135559	0.00016602	0.00016357			60	0.156664	0.164136	4.2725e-05	8.1787e-05			60	0.0274202	2.91984			60	0.000663	0.00063			60	0.165612	0.267058	0.157994			60	0.135314	0.0332117				60	0.962358	0.151115	0.132606				60	0.142401	0.182054
			60.1	0.121069	0.135559	0.00016602	0.00016235			60.1	0.153995	0.168295	4.1504e-05	8.1787e-05			60.1	0.0291893	3.10822			60.1	0.000663	0.000629			60.1	0.162642	0.296591	0.159789			60.1	0.132527	0.0299852				60.1	0.964956	0.154797	0.131167				60.1	0.141086	0.182054
			60.2	0.122769	0.138983	0.00016724	0.00016602			60.2	0.15533	0.162056	4.2725e-05	8.3008e-05			60.2	0.0265356	2.82564			60.2	0.000665	0.000629			60.2	0.162642	0.321202	0.161584			60.2	0.136708	0.0278342				60.2	0.966254	0.152956	0.132606				60.2	0.142401	0.182054
			60.3	0.122769	0.138983	0.00016602	0.00016724			60.3	0.156664	0.155817	4.2725e-05	8.1787e-05			60.3	0.0247665	2.63726			60.3	0.000665	0.000629			60.3	0.165612	0.296591	0.157994			60.3	0.146462	0.0278342				60.3	0.966254	0.154797	0.132606				60.3	0.141086	0.186943
			60.4	0.122769	0.142406	0.00016724	0.00016479			60.4	0.157999	0.159977	4.2725e-05	8.1787e-05			60.4	0.0265356	2.82564			60.4	0.000665	0.000627			60.4	0.156701	0.276903	0.161584			60.4	0.147856	0.0246077				60.4	0.963657	0.154797	0.132606				60.4	0.143717	0.180425
			60.5	0.121069	0.147542	0.00016602	0.00016357			60.5	0.152661	0.157897	4.1504e-05	8.1787e-05			60.5	0.0274202	2.91984			60.5	0.000665	0.00063			60.5	0.153731	0.271981	0.165175			60.5	0.15343	0.0224566				60.5	0.964956	0.15848	0.136921				60.5	0.141086	0.185314
			60.6	0.122769	0.142406	0.00016602	0.00016235			60.6	0.156664	0.153738	4.1504e-05	8.3008e-05			60.6	0.0265356	2.82564			60.6	0.000665	0.000629			60.6	0.162642	0.267058	0.168765			60.6	0.15343	0.0246077				60.6	0.964956	0.156639	0.135483				60.6	0.142401	0.180425
			60.7	0.121069	0.147542	0.00016724	0.00016479			60.7	0.156664	0.151658	4.2725e-05	8.1787e-05			60.7	0.0238819	2.54306			60.7	0.000667	0.000627			60.7	0.162642	0.291669	0.16697			60.7	0.150643	0.0256832				60.7	0.967553	0.15848	0.13836				60.7	0.143717	0.180425
			60.8	0.121069	0.147542	0.00016602	0.00016479			60.8	0.159333	0.153738	4.2725e-05	8.3008e-05			60.8	0.0238819	2.54306			60.8	0.000668	0.000629			60.8	0.156701	0.306436	0.16697			60.8	0.147856	0.0278342				60.8	0.967553	0.15848	0.134044				60.8	0.141086	0.182054
			60.9	0.127869	0.147542	0.00016602	0.00016479			60.9	0.156664	0.151658	4.1504e-05	8.4229e-05			60.9	0.025651	2.73145			60.9	0.000668	0.000627			60.9	0.159672	0.306436	0.159789			60.9	0.149249	0.0256832				60.9	0.964956	0.156639	0.141237				60.9	0.143717	0.177166
			61	0.126169	0.14583	0.00016724	0.00016602			61	0.157999	0.153738	4.2725e-05	8.3008e-05			61	0.0265356	2.82564			61	0.000668	0.000626			61	0.162642	0.276903	0.156199			61	0.150643	0.0246077				61	0.966254	0.154797	0.139798				61	0.142401	0.180425
			61.1	0.124469	0.14583	0.00016724	0.00016479			61.1	0.152661	0.153738	4.3945e-05	8.4229e-05			61.1	0.0274202	2.91984			61.1	0.000669	0.000627			61.1	0.162642	0.291669	0.161584			61.1	0.150643	0.0246077				61.1	0.97145	0.15848	0.142675				61.1	0.145032	0.185314
			61.2	0.126169	0.147542	0.00016602	0.00016479			61.2	0.152661	0.157897	4.2725e-05	8.3008e-05			61.2	0.0283047	3.01403			61.2	0.000669	0.000627			61.2	0.159672	0.262136	0.16697			61.2	0.15343	0.0224566				61.2	0.968852	0.15848	0.145552				61.2	0.146348	0.180425
			61.3	0.122769	0.144118	0.00016846	0.00016479			61.3	0.15533	0.155817	4.2725e-05	8.1787e-05			61.3	0.0265356	2.82564			61.3	0.000668	0.000627			61.3	0.165612	0.271981	0.165175			61.3	0.154823	0.0267587				61.3	0.968852	0.160322	0.142675				61.3	0.146348	0.180425
			61.4	0.122769	0.144118	0.00016602	0.00016479			61.4	0.15533	0.155817	4.2725e-05	8.3008e-05			61.4	0.0265356	2.82564			61.4	0.000667	0.000627			61.4	0.168582	0.291669	0.163379			61.4	0.150643	0.0278342				61.4	0.97145	0.15848	0.141237				61.4	0.147663	0.180425
			61.5	0.126169	0.142406	0.00016724	0.00016479			61.5	0.153995	0.147499	4.2725e-05	8.3008e-05			61.5	0.0265356	2.82564			61.5	0.000669	0.000629			61.5	0.165612	0.311358	0.168765			61.5	0.150643	0.0278342				61.5	0.97145	0.15848	0.136921				61.5	0.145032	0.183684
			61.6	0.127869	0.142406	0.00016602	0.00016235			61.6	0.151326	0.147499	4.2725e-05	8.3008e-05			61.6	0.0283047	3.01403			61.6	0.00067	0.000627			61.6	0.156701	0.301514	0.165175			61.6	0.149249	0.0310607				61.6	0.970151	0.15848	0.144114				61.6	0.148978	0.185314
			61.7	0.127869	0.144118	0.00016724	0.00016357			61.7	0.153995	0.149579	4.2725e-05	8.3008e-05			61.7	0.0265356	2.82564			61.7	0.000671	0.000627			61.7	0.168582	0.291669	0.16697			61.7	0.135314	0.0342872				61.7	0.97145	0.160322	0.142675				61.7	0.145032	0.183684
			61.8	0.124469	0.14583	0.00016724	0.00016479			61.8	0.15533	0.151658	4.2725e-05	8.3008e-05			61.8	0.0247665	2.63726			61.8	0.000669	0.000627			61.8	0.162642	0.267058	0.16697			61.8	0.140888	0.0321362				61.8	0.972749	0.162163	0.139798				61.8	0.150294	0.186943
			61.9	0.122769	0.149253	0.00016724	0.00016602			61.9	0.15533	0.151658	4.1504e-05	8.4229e-05			61.9	0.0247665	2.63726			61.9	0.00067	0.000627			61.9	0.162642	0.24737	0.163379			61.9	0.147856	0.0332117				61.9	0.972749	0.164005	0.13836				61.9	0.146348	0.185314
			62	0.124469	0.147542	0.00016724	0.00016602			62	0.156664	0.151658	4.2725e-05	8.3008e-05			62	0.0265356	2.82564			62	0.000671	0.000627			62	0.171552	0.291669	0.163379			62	0.15343	0.0332117				62	0.972749	0.156639	0.13836				62	0.145032	0.183684
			62.1	0.124469	0.144118	0.00016724	0.00016602			62.1	0.152661	0.147499	4.2725e-05	8.3008e-05			62.1	0.0283047	3.01403			62.1	0.00067	0.00063			62.1	0.174522	0.31628	0.165175			62.1	0.150643	0.0256832				62.1	0.974048	0.160322	0.13836				62.1	0.150294	0.190202
			62.2	0.124469	0.149253	0.00016602	0.00016602			62.2	0.145988	0.153738	4.2725e-05	8.3008e-05			62.2	0.0265356	2.82564			62.2	0.000671	0.000627			62.2	0.159672	0.31628	0.163379			62.2	0.15343	0.0310607				62.2	0.972749	0.160322	0.13836				62.2	0.147663	0.186943
			62.3	0.122769	0.147542	0.00016602	0.00016602			62.3	0.147322	0.153738	4.3945e-05	8.4229e-05			62.3	0.0283047	3.01403			62.3	0.000671	0.000629			62.3	0.165612	0.286747	0.163379			62.3	0.143675	0.0299852				62.3	0.974048	0.165846	0.144114				62.3	0.148978	0.185314
			62.4	0.127869	0.152677	0.00016724	0.00016479			62.4	0.143319	0.155817	4.3945e-05	8.4229e-05			62.4	0.0283047	3.01403			62.4	0.000671	0.000629			62.4	0.174522	0.306436	0.17056			62.4	0.147856	0.0278342				62.4	0.975347	0.162163	0.139798				62.4	0.148978	0.186943
			62.5	0.122769	0.150965	0.00016724	0.00016479			62.5	0.145988	0.155817	4.2725e-05	8.3008e-05			62.5	0.0265356	2.82564			62.5	0.000671	0.000627			62.5	0.165612	0.281825	0.172355			62.5	0.154823	0.0278342				62.5	0.974048	0.162163	0.139798				62.5	0.151609	0.183684
			62.6	0.126169	0.154389	0.00016602	0.00016357			62.6	0.145988	0.153738	4.3945e-05	8.4229e-05			62.6	0.0274202	2.91984			62.6	0.000671	0.000627			62.6	0.168582	0.257214	0.17056			62.6	0.156217	0.0299852				62.6	0.974048	0.162163	0.142675				62.6	0.152925	0.186943
			62.7	0.129569	0.154389	0.00016724	0.00016602			62.7	0.144653	0.14542	4.2725e-05	8.4229e-05			62.7	0.0327276	3.48499			62.7	0.000673	0.000627			62.7	0.174522	0.291669	0.16697			62.7	0.150643	0.0321362				62.7	0.974048	0.167688	0.142675				62.7	0.151609	0.186943
			62.8	0.127869	0.154389	0.00016724	0.00016479			62.8	0.151326	0.14542	4.2725e-05	8.3008e-05			62.8	0.0327276	3.48499			62.8	0.000673	0.000627			62.8	0.168582	0.311358	0.168765			62.8	0.154823	0.0278342				62.8	0.972749	0.15848	0.145552				62.8	0.15424	0.191832
			62.9	0.131269	0.152677	0.00016724	0.00016602			62.9	0.147322	0.147499	4.3945e-05	8.3008e-05			62.9	0.0309584	3.29661			62.9	0.000673	0.000626			62.9	0.165612	0.321202	0.168765			62.9	0.146462	0.0289097				62.9	0.977945	0.162163	0.144114				62.9	0.148978	0.191832
			63	0.132969	0.152677	0.00016724	0.00016479			63	0.144653	0.157897	4.2725e-05	8.4229e-05			63	0.0300739	3.20241			63	0.000673	0.00063			63	0.171552	0.306436	0.16697			63	0.145069	0.0299852				63	0.981841	0.160322	0.145552				63	0.151609	0.190202
			63.1	0.129569	0.154389	0.00016724	0.00016602			63.1	0.145988	0.153738	4.2725e-05	8.4229e-05			63.1	0.0309584	3.29661			63.1	0.000673	0.000627			63.1	0.174522	0.276903	0.17056			63.1	0.149249	0.0289097				63.1	0.981841	0.164005	0.141237				63.1	0.152925	0.193461
			63.2	0.129569	0.1561	0.00016846	0.00016724			63.2	0.148657	0.149579	4.5166e-05	8.4229e-05			63.2	0.0336121	3.57919			63.2	0.000674	0.000629			63.2	0.165612	0.276903	0.168765			63.2	0.152036	0.0299852				63.2	0.981841	0.160322	0.145552				63.2	0.151609	0.185314
			63.3	0.131269	0.150965	0.00016846	0.00016602			63.3	0.148657	0.149579	4.3945e-05	8.5449e-05			63.3	0.0353813	3.76757			63.3	0.000675	0.000629			63.3	0.162642	0.286747	0.17056			63.3	0.154823	0.0267587				63.3	0.976646	0.167688	0.13836				63.3	0.155555	0.193461
			63.4	0.131269	0.149253	0.00016602	0.00016602			63.4	0.144653	0.162056	4.2725e-05	8.4229e-05			63.4	0.031843	3.3908			63.4	0.000675	0.000629			63.4	0.171552	0.321202	0.17415			63.4	0.156217	0.0267587				63.4	0.977945	0.162163	0.139798				63.4	0.152925	0.191832
			63.5	0.132969	0.150965	0.00016724	0.00016479			63.5	0.149992	0.164136	4.2725e-05	8.3008e-05			63.5	0.031843	3.3908			63.5	0.000674	0.000629			63.5	0.159672	0.321202	0.17415			63.5	0.152036	0.0321362				63.5	0.977945	0.167688	0.141237				63.5	0.152925	0.191832
			63.6	0.134669	0.150965	0.00016724	0.00016479			63.6	0.156664	0.159977	4.2725e-05	8.5449e-05			63.6	0.0309584	3.29661			63.6	0.000675	0.000627			63.6	0.162642	0.321202	0.17415			63.6	0.156217	0.0310607				63.6	0.979243	0.165846	0.141237				63.6	0.155555	0.195091
			63.7	0.132969	0.149253	0.00016724	0.00016602			63.7	0.159333	0.164136	4.3945e-05	8.5449e-05			63.7	0.0336121	3.57919			63.7	0.000675	0.000629			63.7	0.168582	0.281825	0.168765			63.7	0.15761	0.0332117				63.7	0.979243	0.169529	0.145552				63.7	0.150294	0.191832
			63.8	0.132969	0.149253	0.00016724	0.00016724			63.8	0.163337	0.157897	4.2725e-05	8.4229e-05			63.8	0.0353813	3.76757			63.8	0.000676	0.000629			63.8	0.171552	0.286747	0.168765			63.8	0.15761	0.0310607				63.8	0.980542	0.164005	0.139798				63.8	0.155555	0.190202
			63.9	0.132969	0.150965	0.00016846	0.00016602			63.9	0.160668	0.153738	4.1504e-05	8.5449e-05			63.9	0.0327276	3.48499			63.9	0.000677	0.000631			63.9	0.168582	0.286747	0.172355			63.9	0.154823	0.0310607				63.9	0.980542	0.167688	0.139798				63.9	0.152925	0.193461
			64	0.134669	0.152677	0.00016724	0.00016479			64	0.157999	0.159977	4.2725e-05	8.4229e-05			64	0.0291893	3.10822			64	0.000677	0.000629			64	0.165612	0.301514	0.172355			64	0.154823	0.0289097				64	0.980542	0.165846	0.139798				64	0.155555	0.191832
			64.1	0.136369	0.152677	0.00016724	0.00016602			64.1	0.163337	0.157897	4.2725e-05	8.5449e-05			64.1	0.0265356	2.82564			64.1	0.000679	0.000629			64.1	0.174522	0.306436	0.17056			64.1	0.15343	0.0332117				64.1	0.980542	0.171371	0.141237				64.1	0.15424	0.195091
			64.2	0.136369	0.152677	0.00016724	0.00016602			64.2	0.162002	0.159977	4.3945e-05	8.5449e-05			64.2	0.0265356	2.82564			64.2	0.000679	0.000627			64.2	0.168582	0.306436	0.17415			64.2	0.156217	0.0332117				64.2	0.977945	0.165846	0.144114				64.2	0.155555	0.193461
			64.3	0.136369	0.154389	0.00016724	0.00016602			64.3	0.166006	0.162056	4.2725e-05	8.4229e-05			64.3	0.0274202	2.91984			64.3	0.000679	0.00063			64.3	0.171552	0.306436	0.175946			64.3	0.15761	0.0353627				64.3	0.977945	0.171371	0.144114				64.3	0.158186	0.195091
			64.4	0.131269	0.1561	0.00016724	0.00016602			64.4	0.162002	0.159977	4.2725e-05	8.4229e-05			64.4	0.0291893	3.10822			64.4	0.000677	0.000632			64.4	0.174522	0.286747	0.179536			64.4	0.159004	0.0321362				64.4	0.980542	0.167688	0.145552				64.4	0.156871	0.191832
			64.5	0.136369	0.1561	0.00016724	0.00016479			64.5	0.162002	0.162056	4.2725e-05	8.3008e-05			64.5	0.0300739	3.20241			64.5	0.000677	0.000631			64.5	0.174522	0.286747	0.179536			64.5	0.15761	0.0299852				64.5	0.977945	0.171371	0.142675				64.5	0.158186	0.193461
			64.6	0.136369	0.157812	0.00016724	0.00016602			64.6	0.159333	0.166215	4.3945e-05	8.4229e-05			64.6	0.025651	2.73145			64.6	0.00068	0.00063			64.6	0.168582	0.286747	0.177741			64.6	0.15761	0.0289097				64.6	0.977945	0.167688	0.149868				64.6	0.156871	0.19835
			64.7	0.134669	0.157812	0.00016724	0.00016602			64.7	0.160668	0.166215	4.2725e-05	8.4229e-05			64.7	0.0265356	2.82564			64.7	0.00068	0.000629			64.7	0.168582	0.321202	0.175946			64.7	0.156217	0.0299852				64.7	0.979243	0.171371	0.151306				64.7	0.159502	0.19672
			64.8	0.136369	0.154389	0.00016602	0.00016479			64.8	0.163337	0.164136	4.3945e-05	8.5449e-05			64.8	0.0291893	3.10822			64.8	0.000679	0.00063			64.8	0.174522	0.31628	0.17415			64.8	0.154823	0.0332117				64.8	0.979243	0.173212	0.146991				64.8	0.156871	0.19998
			64.9	0.138069	0.1561	0.00016724	0.00016602			64.9	0.160668	0.166215	4.2725e-05	8.5449e-05			64.9	0.0309584	3.29661			64.9	0.00068	0.000629			64.9	0.168582	0.301514	0.175946			64.9	0.15761	0.0332117				64.9	0.980542	0.173212	0.148429				64.9	0.158186	0.19835
			65	0.134669	0.1561	0.00016846	0.00016602			65	0.160668	0.162056	4.1504e-05	8.4229e-05			65	0.031843	3.3908			65	0.000679	0.00063			65	0.174522	0.286747	0.179536			65	0.160397	0.0342872				65	0.981841	0.173212	0.142675				65	0.158186	0.195091
			65.1	0.139769	0.1561	0.00016846	0.00016602			65.1	0.162002	0.166215	4.3945e-05	8.4229e-05			65.1	0.0309584	3.29661			65.1	0.000681	0.000631			65.1	0.177492	0.267058	0.181331			65.1	0.15761	0.0332117				65.1	0.977945	0.173212	0.148429				65.1	0.158186	0.19998
			65.2	0.139769	0.150965	0.00016724	0.00016479			65.2	0.162002	0.162056	4.2725e-05	8.4229e-05			65.2	0.0309584	3.29661			65.2	0.000681	0.000631			65.2	0.174522	0.301514	0.177741			65.2	0.15761	0.0310607				65.2	0.980542	0.169529	0.149868				65.2	0.160817	0.19835
			65.3	0.139769	0.152677	0.00016724	0.00016479			65.3	0.164671	0.162056	4.2725e-05	8.5449e-05			65.3	0.0300739	3.20241			65.3	0.000681	0.000629			65.3	0.171552	0.31628	0.179536			65.3	0.15761	0.0321362				65.3	0.979243	0.171371	0.151306				65.3	0.155555	0.201609
			65.4	0.14147	0.150965	0.00016846	0.00016479			65.4	0.168675	0.159977	4.2725e-05	8.5449e-05			65.4	0.0300739	3.20241			65.4	0.00068	0.000631			65.4	0.174522	0.331047	0.179536			65.4	0.160397	0.0299852				65.4	0.980542	0.169529	0.149868				65.4	0.156871	0.19998
			65.5	0.139769	0.152677	0.00016846	0.00016602			65.5	0.17001	0.162056	4.5166e-05	8.667e-05			65.5	0.0309584	3.29661			65.5	0.000681	0.000629			65.5	0.171552	0.31628	0.177741			65.5	0.15761	0.0310607				65.5	0.98314	0.173212	0.149868				65.5	0.156871	0.19672
			65.6	0.139769	0.149253	0.00016846	0.00016602			65.6	0.172679	0.168295	4.7607e-05	8.5449e-05			65.6	0.0336121	3.57919			65.6	0.00068	0.000629			65.6	0.162642	0.301514	0.175946			65.6	0.161791	0.0321362				65.6	0.981841	0.171371	0.149868				65.6	0.159502	0.201609
			65.7	0.139769	0.152677	0.00016846	0.00016479			65.7	0.174013	0.168295	4.8828e-05	8.4229e-05			65.7	0.0327276	3.48499			65.7	0.00068	0.00063			65.7	0.174522	0.321202	0.175946			65.7	0.163184	0.0321362				65.7	0.98314	0.175054	0.146991				65.7	0.159502	0.19672
			65.8	0.139769	0.152677	0.00016846	0.00016602			65.8	0.172679	0.168295	4.8828e-05	8.5449e-05			65.8	0.031843	3.3908			65.8	0.00068	0.000629			65.8	0.174522	0.326125	0.175946			65.8	0.178513	0.0321362				65.8	0.981841	0.173212	0.148429				65.8	0.158186	0.201609
			65.9	0.139769	0.154389	0.00016846	0.00016602			65.9	0.171344	0.170374	4.7607e-05	8.5449e-05			65.9	0.0327276	3.48499			65.9	0.00068	0.000629			65.9	0.171552	0.326125	0.181331			65.9	0.178513	0.0342872				65.9	0.980542	0.173212	0.145552				65.9	0.160817	0.19998
			66	0.14147	0.157812	0.00016846	0.00016724			66	0.17001	0.170374	4.6387e-05	8.5449e-05			66	0.0353813	3.76757			66	0.000681	0.000629			66	0.168582	0.326125	0.175946			66	0.175726	0.0364383				66	0.981841	0.173212	0.151306				66	0.159502	0.19835
			66.1	0.139769	0.161236	0.00016846	0.00016602			66.1	0.17001	0.170374	4.5166e-05	8.5449e-05			66.1	0.0362659	3.86177			66.1	0.00068	0.00063			66.1	0.174522	0.306436	0.179536			66.1	0.177119	0.0332117				66.1	0.981841	0.176895	0.148429				66.1	0.162133	0.204868
			66.2	0.136369	0.161236	0.00016846	0.00016602			66.2	0.174013	0.164136	4.5166e-05	8.4229e-05			66.2	0.0353813	3.76757			66.2	0.000684	0.000631			66.2	0.180462	0.31628	0.181331			66.2	0.178513	0.0353627				66.2	0.984439	0.176895	0.151306				66.2	0.158186	0.19998
			66.3	0.139769	0.161236	0.00016846	0.00016724			66.3	0.174013	0.164136	4.3945e-05	8.5449e-05			66.3	0.0327276	3.48499			66.3	0.000681	0.000629			66.3	0.186402	0.331047	0.184921			66.3	0.182693	0.0353627				66.3	0.98314	0.176895	0.149868				66.3	0.159502	0.203239
			66.4	0.14147	0.152677	0.00016968	0.00016724			66.4	0.171344	0.162056	4.3945e-05	8.5449e-05			66.4	0.0344967	3.67338			66.4	0.000682	0.00063			66.4	0.198283	0.311358	0.188512			66.4	0.182693	0.0353627				66.4	0.98314	0.175054	0.149868				66.4	0.159502	0.203239
			66.5	0.14147	0.150965	0.00016846	0.00016846			66.5	0.166006	0.166215	4.3945e-05	8.5449e-05			66.5	0.0327276	3.48499			66.5	0.000682	0.000627			66.5	0.189372	0.321202	0.186716			66.5	0.181299	0.0332117				66.5	0.984439	0.176895	0.151306				66.5	0.159502	0.203239
			66.6	0.14317	0.150965	0.00016846	0.0001709			66.6	0.159333	0.172454	4.2725e-05	8.4229e-05			66.6	0.0344967	3.67338			66.6	0.000681	0.000629			66.6	0.180462	0.335969	0.181331			66.6	0.177119	0.0353627				66.6	0.979243	0.175054	0.151306				66.6	0.160817	0.206498
			66.7	0.14147	0.154389	0.00016846	0.0001709			66.7	0.160668	0.168295	4.2725e-05	8.5449e-05			66.7	0.0362659	3.86177			66.7	0.00068	0.00063			66.7	0.183432	0.335969	0.181331			66.7	0.175726	0.0385893				66.7	0.984439	0.182419	0.15706				66.7	0.160817	0.203239
			66.8	0.14147	0.1561	0.00016846	0.00017334			66.8	0.160668	0.168295	4.3945e-05	8.5449e-05			66.8	0.0344967	3.67338			66.8	0.000681	0.000629			66.8	0.186402	0.331047	0.181331			66.8	0.174332	0.0385893				66.8	0.984439	0.180578	0.154183				66.8	0.162133	0.204868
			66.9	0.14147	0.152677	0.00016846	0.00017334			66.9	0.156664	0.174534	4.3945e-05	8.5449e-05			66.9	0.0336121	3.57919			66.9	0.000682	0.000629			66.9	0.186402	0.306436	0.184921			66.9	0.179906	0.0364383				66.9	0.985738	0.182419	0.155622				66.9	0.162133	0.204868
			67	0.14147	0.1561	0.00016846	0.00017334			67	0.15533	0.176613	4.3945e-05	8.5449e-05			67	0.0327276	3.48499			67	0.000684	0.00063			67	0.198283	0.306436	0.183126			67	0.178513	0.0375138				67	0.984439	0.178736	0.152745				67	0.163448	0.204868
			67.1	0.14147	0.159524	0.00016968	0.00017212			67.1	0.157999	0.174534	4.3945e-05	8.4229e-05			67.1	0.0344967	3.67338			67.1	0.000684	0.00063			67.1	0.192342	0.321202	0.186716			67.1	0.178513	0.0385893				67.1	0.985738	0.176895	0.152745				67.1	0.164763	0.206498
			67.2	0.14147	0.164659	0.00016846	0.00017456			67.2	0.166006	0.172454	4.3945e-05	8.5449e-05			67.2	0.0353813	3.76757			67.2	0.000682	0.000629			67.2	0.189372	0.311358	0.181331			67.2	0.178513	0.0407403				67.2	0.984439	0.178736	0.15706				67.2	0.163448	0.203239
			67.3	0.14147	0.161236	0.00016724	0.00017578			67.3	0.163337	0.168295	4.1504e-05	8.667e-05			67.3	0.038035	4.05015			67.3	0.000684	0.000629			67.3	0.189372	0.340891	0.179536			67.3	0.160397	0.0428913				67.3	0.985738	0.184261	0.154183				67.3	0.164763	0.203239
			67.4	0.139769	0.164659	0.00016724	0.000177			67.4	0.164671	0.166215	4.0283e-05	8.667e-05			67.4	0.0344967	3.67338			67.4	0.000684	0.000629			67.4	0.201253	0.350736	0.190307			67.4	0.152036	0.0418158				67.4	0.987037	0.184261	0.15706				67.4	0.162133	0.208127
			67.5	0.14147	0.168083	0.00016846	0.00017822			67.5	0.168675	0.168295	4.0283e-05	8.5449e-05			67.5	0.0353813	3.76757			67.5	0.000684	0.000629			67.5	0.192342	0.335969	0.193897			67.5	0.15761	0.0364383				67.5	0.989635	0.184261	0.152745				67.5	0.162133	0.203239
			67.6	0.14317	0.166371	0.00016968	0.00018066			67.6	0.171344	0.168295	4.3945e-05	8.4229e-05			67.6	0.0398041	4.23854			67.6	0.000684	0.000629			67.6	0.186402	0.301514	0.195692			67.6	0.156217	0.0385893				67.6	0.990933	0.184261	0.155622				67.6	0.166079	0.211386
			67.7	0.14317	0.162948	0.00016846	0.00018066			67.7	0.17001	0.168295	4.5166e-05	8.4229e-05			67.7	0.0389196	4.14435			67.7	0.000686	0.00063			67.7	0.195312	0.31628	0.193897			67.7	0.152036	0.0375138				67.7	0.990933	0.184261	0.154183				67.7	0.163448	0.209757
			67.8	0.14317	0.161236	0.00016846	0.00018311			67.8	0.171344	0.170374	4.2725e-05	8.5449e-05			67.8	0.0389196	4.14435			67.8	0.000688	0.00063			67.8	0.189372	0.296591	0.192102			67.8	0.15343	0.0353627				67.8	0.987037	0.184261	0.154183				67.8	0.166079	0.211386
			67.9	0.14317	0.161236	0.00016846	0.00018433			67.9	0.176682	0.174534	4.3945e-05	8.667e-05			67.9	0.0424578	4.52112			67.9	0.000695	0.000631			67.9	0.189372	0.355658	0.188512			67.9	0.161791	0.0407403				67.9	0.992232	0.187944	0.15706				67.9	0.162133	0.216275
			68	0.14657	0.161236	0.00016968	0.00018433			68	0.174013	0.174534	4.1504e-05	8.4229e-05			68	0.0415733	4.42693			68	0.000692	0.00063			68	0.198283	0.375347	0.190307			68	0.164578	0.0428913				68	0.990933	0.186102	0.154183				68	0.166079	0.211386
			68.1	0.14487	0.162948	0.00016968	0.00018677			68.1	0.171344	0.178693	4.2725e-05	8.5449e-05			68.1	0.0406887	4.33273			68.1	0.000692	0.00063			68.1	0.198283	0.340891	0.190307			68.1	0.170152	0.0428913				68.1	0.992232	0.186102	0.158499				68.1	0.167394	0.211386
			68.2	0.14657	0.164659	0.0001709	0.00018799			68.2	0.172679	0.178693	4.2725e-05	8.5449e-05			68.2	0.0398041	4.23854			68.2	0.000687	0.00063			68.2	0.192342	0.326125	0.193897			68.2	0.171545	0.0385893				68.2	0.992232	0.186102	0.149868				68.2	0.164763	0.211386
			68.3	0.14827	0.161236	0.00016968	0.00018921			68.3	0.168675	0.172454	4.2725e-05	8.4229e-05			68.3	0.0415733	4.42693			68.3	0.000687	0.000631			68.3	0.198283	0.306436	0.197487			68.3	0.170152	0.0428913				68.3	0.992232	0.186102	0.154183				68.3	0.167394	0.213016
			68.4	0.14997	0.162948	0.00016846	0.00019043			68.4	0.168675	0.170374	4.2725e-05	8.4229e-05			68.4	0.0424578	4.52112			68.4	0.000687	0.00063			68.4	0.195312	0.321202	0.195692			68.4	0.163184	0.0428913				68.4	0.992232	0.186102	0.154183				68.4	0.164763	0.217905
			68.5	0.14827	0.168083	0.00016846	0.00019165			68.5	0.174013	0.170374	4.2725e-05	8.5449e-05			68.5	0.044227	4.7095			68.5	0.000685	0.000631			68.5	0.192342	0.345813	0.195692			68.5	0.163184	0.0450423				68.5	0.990933	0.189785	0.155622				68.5	0.166079	0.211386
			68.6	0.14997	0.166371	0.00016846	0.00019287			68.6	0.186024	0.170374	4.2725e-05	8.5449e-05			68.6	0.0415733	4.42693			68.6	0.000685	0.00063			68.6	0.192342	0.365502	0.190307			68.6	0.163184	0.0493444				68.6	0.989635	0.186102	0.15706				68.6	0.16871	0.216275
			68.7	0.14827	0.171506	0.00016846	0.00019287			68.7	0.183355	0.178693	4.1504e-05	8.5449e-05			68.7	0.0424578	4.52112			68.7	0.000686	0.00063			68.7	0.207193	0.340891	0.193897			68.7	0.167365	0.0471934				68.7	0.988336	0.187944	0.155622				68.7	0.167394	0.214646
			68.8	0.15167	0.173218	0.00016846	0.00019409			68.8	0.171344	0.174534	4.2725e-05	8.5449e-05			68.8	0.0415733	4.42693			68.8	0.000687	0.000631			68.8	0.198283	0.321202	0.193897			68.8	0.174332	0.0439668				68.8	0.989635	0.184261	0.159937				68.8	0.170025	0.213016
			68.9	0.15167	0.171506	0.00016968	0.00019409			68.9	0.17001	0.172454	4.2725e-05	8.4229e-05			68.9	0.0389196	4.14435			68.9	0.000682	0.000631			68.9	0.192342	0.311358	0.197487			68.9	0.172939	0.0461178				68.9	0.990933	0.187944	0.152745				68.9	0.166079	0.217905
			69	0.15167	0.17493	0.00016968	0.00019775			69	0.17001	0.180772	4.3945e-05	8.667e-05			69	0.0415733	4.42693			69	0.000686	0.000631			69	0.201253	0.36058	0.195692			69	0.168758	0.0450423				69	0.989635	0.184261	0.159937				69	0.170025	0.214646
			69.1	0.15507	0.173218	0.00016968	0.0002002			69.1	0.174013	0.182852	4.3945e-05	8.5449e-05			69.1	0.0433424	4.61531			69.1	0.000687	0.000631			69.1	0.204223	0.395035	0.193897			69.1	0.168758	0.0450423				69.1	0.988336	0.193468	0.155622				69.1	0.164763	0.216275
			69.2	0.15337	0.171506	0.00016968	0.0002002			69.2	0.178017	0.182852	4.2725e-05	8.5449e-05			69.2	0.0424578	4.52112			69.2	0.000686	0.000631			69.2	0.198283	0.375347	0.195692			69.2	0.170152	0.0439668				69.2	0.990933	0.189785	0.159937				69.2	0.166079	0.216275
			69.3	0.15507	0.171506	0.00016968	0.00020264			69.3	0.175348	0.178693	4.2725e-05	8.5449e-05			69.3	0.0424578	4.52112			69.3	0.000687	0.00063			69.3	0.213133	0.365502	0.202873			69.3	0.170152	0.0493444				69.3	0.990933	0.191627	0.158499				69.3	0.16871	0.213016
			69.4	0.15337	0.171506	0.0001709	0.0002063			69.4	0.174013	0.182852	4.3945e-05	8.4229e-05			69.4	0.0424578	4.52112			69.4	0.000687	0.00063			69.4	0.207193	0.335969	0.199283			69.4	0.172939	0.0482689				69.4	0.992232	0.189785	0.159937				69.4	0.166079	0.216275
			69.5	0.15677	0.168083	0.00016968	0.00020874			69.5	0.17001	0.176613	4.3945e-05	8.5449e-05			69.5	0.0459961	4.89789			69.5	0.000687	0.00063			69.5	0.198283	0.335969	0.197487			69.5	0.170152	0.0493444				69.5	0.990933	0.191627	0.15706				69.5	0.170025	0.217905
			69.6	0.15677	0.168083	0.00016968	0.00020752			69.6	0.171344	0.187011	4.3945e-05	8.5449e-05			69.6	0.0433424	4.61531			69.6	0.000688	0.000629			69.6	0.204223	0.340891	0.195692			69.6	0.170152	0.0471934				69.6	0.992232	0.189785	0.15706				69.6	0.167394	0.216275
			69.7	0.15677	0.168083	0.00016968	0.00020874			69.7	0.176682	0.184931	4.2725e-05	8.667e-05			69.7	0.0406887	4.33273			69.7	0.000687	0.000629			69.7	0.207193	0.335969	0.193897			69.7	0.168758	0.0407403				69.7	0.988336	0.19531	0.159937				69.7	0.164763	0.219534
			69.8	0.15507	0.169795	0.00016968	0.00020874			69.8	0.175348	0.184931	4.3945e-05	8.5449e-05			69.8	0.0398041	4.23854			69.8	0.000688	0.000629			69.8	0.198283	0.335969	0.195692			69.8	0.168758	0.0418158				69.8	0.990933	0.191627	0.158499				69.8	0.167394	0.217905
			69.9	0.14827	0.171506	0.00016968	0.00020996			69.9	0.174013	0.187011	4.3945e-05	8.5449e-05			69.9	0.0406887	4.33273			69.9	0.000692	0.000629			69.9	0.201253	0.340891	0.199283			69.9	0.168758	0.0407403				69.9	0.989635	0.193468	0.159937				69.9	0.167394	0.217905
			70	0.15507	0.171506	0.00016968	0.0002124			70	0.180686	0.184931	4.3945e-05	8.5449e-05			70	0.0424578	4.52112			70	0.000691	0.00063			70	0.204223	0.340891	0.199283			70	0.174332	0.0439668				70	0.989635	0.191627	0.158499				70	0.170025	0.219534
			70.1	0.14997	0.171506	0.00016968	0.00021484			70.1	0.190028	0.187011	4.5166e-05	8.667e-05			70.1	0.0406887	4.33273			70.1	0.000688	0.000631			70.1	0.198283	0.311358	0.204668			70.1	0.170152	0.0450423				70.1	0.990933	0.193468	0.158499				70.1	0.167394	0.216275
			70.2	0.15167	0.173218	0.00016968	0.00021484			70.2	0.191362	0.19117	4.3945e-05	8.667e-05			70.2	0.0398041	4.23854			70.2	0.000677	0.00063			70.2	0.201253	0.306436	0.201078			70.2	0.170152	0.0439668				70.2	0.989635	0.193468	0.161376				70.2	0.16871	0.219534
			70.3	0.15337	0.17493	0.0001709	0.00021484			70.3	0.186024	0.18909	4.3945e-05	8.667e-05			70.3	0.0433424	4.61531			70.3	0.000675	0.00063			70.3	0.210163	0.301514	0.202873			70.3	0.168758	0.0418158				70.3	0.988336	0.19531	0.159937				70.3	0.167394	0.219534
			70.4	0.15337	0.17493	0.00016968	0.00021729			70.4	0.187359	0.187011	4.3945e-05	8.7891e-05			70.4	0.044227	4.7095			70.4	0.000682	0.000629			70.4	0.204223	0.306436	0.204668			70.4	0.168758	0.0418158				70.4	0.989635	0.19531	0.161376				70.4	0.167394	0.219534
			70.5	0.15337	0.176642	0.00016846	0.00021973			70.5	0.190028	0.187011	4.3945e-05	8.667e-05			70.5	0.044227	4.7095			70.5	0.000688	0.000629			70.5	0.201253	0.340891	0.204668			70.5	0.171545	0.0428913				70.5	0.989635	0.193468	0.158499				70.5	0.17134	0.224423
			70.6	0.15507	0.17493	0.00016968	0.00021973			70.6	0.192697	0.184931	4.5166e-05	8.5449e-05			70.6	0.0433424	4.61531			70.6	0.00069	0.00063			70.6	0.210163	0.345813	0.206463			70.6	0.172939	0.0418158				70.6	0.990933	0.197151	0.164253				70.6	0.170025	0.214646
			70.7	0.15507	0.17493	0.0001709	0.00021973			70.7	0.192697	0.182852	4.3945e-05	8.667e-05			70.7	0.0433424	4.61531			70.7	0.000688	0.000629			70.7	0.210163	0.331047	0.202873			70.7	0.172939	0.0428913				70.7	0.990933	0.198992	0.158499				70.7	0.172656	0.219534
			70.8	0.15507	0.17493	0.00016968	0.00022095			70.8	0.188693	0.180772	4.3945e-05	8.5449e-05			70.8	0.0406887	4.33273			70.8	0.00069	0.000629			70.8	0.207193	0.331047	0.204668			70.8	0.164578	0.0450423				70.8	0.992232	0.200834	0.162814				70.8	0.170025	0.222793
			70.9	0.15677	0.176642	0.00016846	0.00022095			70.9	0.187359	0.184931	4.3945e-05	8.667e-05			70.9	0.0433424	4.61531			70.9	0.000692	0.000629			70.9	0.210163	0.331047	0.202873			70.9	0.160397	0.0482689				70.9	0.992232	0.197151	0.161376				70.9	0.170025	0.219534
			71	0.15677	0.178354	0.00016846	0.00022095			71	0.188693	0.182852	4.2725e-05	8.5449e-05			71	0.0415733	4.42693			71	0.000691	0.000631			71	0.210163	0.335969	0.204668			71	0.163184	0.0471934				71	0.989635	0.197151	0.161376				71	0.172656	0.221164
			71.1	0.15847	0.176642	0.00016968	0.00022339			71.1	0.191362	0.184931	4.2725e-05	8.667e-05			71.1	0.0433424	4.61531			71.1	0.00069	0.00063			71.1	0.201253	0.36058	0.201078			71.1	0.165971	0.0482689				71.1	0.988336	0.198992	0.162814				71.1	0.170025	0.221164
			71.2	0.15677	0.176642	0.00016846	0.00022461			71.2	0.194031	0.187011	4.3945e-05	8.5449e-05			71.2	0.0424578	4.52112			71.2	0.000688	0.00063			71.2	0.210163	0.375347	0.204668			71.2	0.165971	0.0471934				71.2	0.992232	0.198992	0.162814				71.2	0.173971	0.219534
			71.3	0.16017	0.17493	0.00016846	0.00022339			71.3	0.191362	0.184931	4.3945e-05	8.5449e-05			71.3	0.0415733	4.42693			71.3	0.000691	0.00063			71.3	0.213133	0.335969	0.206463			71.3	0.168758	0.0493444				71.3	0.992232	0.19531	0.164253				71.3	0.172656	0.229312
			71.4	0.16187	0.173218	0.00016846	0.00022339			71.4	0.190028	0.18909	4.3945e-05	8.5449e-05			71.4	0.0406887	4.33273			71.4	0.000691	0.00063			71.4	0.213133	0.340891	0.208258			71.4	0.163184	0.0493444				71.4	0.996129	0.200834	0.165691				71.4	0.175287	0.224423
			71.5	0.16357	0.17493	0.0001709	0.00022339			71.5	0.191362	0.18909	4.1504e-05	8.667e-05			71.5	0.0398041	4.23854			71.5	0.000692	0.000631			71.5	0.213133	0.355658	0.208258			71.5	0.161791	0.0471934				71.5	0.993531	0.198992	0.16713				71.5	0.173971	0.226053
			71.6	0.16017	0.17493	0.0001709	0.00022461			71.6	0.194031	0.184931	4.2725e-05	8.667e-05			71.6	0.044227	4.7095			71.6	0.000692	0.000631			71.6	0.219073	0.36058	0.210053			71.6	0.161791	0.0493444				71.6	0.996129	0.200834	0.16713				71.6	0.17134	0.227682
			71.7	0.16187	0.176642	0.00016968	0.00022583			71.7	0.195366	0.180772	4.2725e-05	8.667e-05			71.7	0.0433424	4.61531			71.7	0.000692	0.00063			71.7	0.213133	0.385191	0.206463			71.7	0.164578	0.0536464				71.7	0.998727	0.202675	0.170007				71.7	0.176602	0.224423
			71.8	0.15507	0.178354	0.00016968	0.00022705			71.8	0.1967	0.180772	4.2725e-05	8.667e-05			71.8	0.0398041	4.23854			71.8	0.000693	0.00063			71.8	0.210163	0.40488	0.206463			71.8	0.164578	0.0504199				71.8	0.997428	0.200834	0.172884				71.8	0.173971	0.226053
			71.9	0.16017	0.178354	0.00016968	0.00022705			71.9	0.191362	0.182852	4.1504e-05	8.667e-05			71.9	0.0433424	4.61531			71.9	0.000691	0.00063			71.9	0.219073	0.40488	0.204668			71.9	0.168758	0.0482689				71.9	0.997428	0.198992	0.170007				71.9	0.176602	0.229312
			72	0.16187	0.178354	0.00016968	0.00022827			72	0.191362	0.182852	4.1504e-05	8.667e-05			72	0.0424578	4.52112			72	0.000693	0.00063			72	0.219073	0.390113	0.202873			72	0.172939	0.0482689				72	0.998727	0.198992	0.168568				72	0.173971	0.224423
			72.1	0.16357	0.178354	0.00016968	0.00022827			72.1	0.186024	0.187011	4.2725e-05	8.7891e-05			72.1	0.0424578	4.52112			72.1	0.000691	0.000629			72.1	0.213133	0.40488	0.206463			72.1	0.167365	0.0504199				72.1	0.99483	0.200834	0.16713				72.1	0.176602	0.230941
			72.2	0.16357	0.183489	0.00016968	0.00022827			72.2	0.194031	0.18909	4.3945e-05	8.667e-05			72.2	0.0451115	4.8037			72.2	0.000692	0.00063			72.2	0.213133	0.395035	0.206463			72.2	0.165971	0.0504199				72.2	0.996129	0.204517	0.170007				72.2	0.172656	0.227682
			72.3	0.16357	0.185201	0.0001709	0.00022949			72.3	0.195366	0.18909	4.2725e-05	8.667e-05			72.3	0.0433424	4.61531			72.3	0.000692	0.00063			72.3	0.222043	0.424568	0.206463			72.3	0.170152	0.0514954				72.3	0.993531	0.198992	0.170007				72.3	0.175287	0.227682
			72.4	0.16017	0.188624	0.0001709	0.00022949			72.4	0.194031	0.19117	4.1504e-05	8.667e-05			72.4	0.0406887	4.33273			72.4	0.000693	0.000631			72.4	0.207193	0.449179	0.206463			72.4	0.401472	0.0547219				72.4	0.990933	0.202675	0.171445				72.4	0.179233	0.230941
			72.5	0.16187	0.185201	0.0001709	0.00023071			72.5	0.1967	0.18909	4.3945e-05	8.667e-05			72.5	0.0424578	4.52112			72.5	0.000693	0.000631			72.5	0.213133	0.365502	0.211849			72.5	0.533854	0.0547219				72.5	0.993531	0.200834	0.172884				72.5	0.179233	0.227682
			72.6	0.16527	0.181777	0.00016968	0.00023071			72.6	0.1967	0.19117	4.2725e-05	8.667e-05			72.6	0.0433424	4.61531			72.6	0.000693	0.000631			72.6	0.216103	0.301514	0.211849			72.6	0.656482	0.0471934				72.6	0.99483	0.200834	0.172884				72.6	0.179233	0.232571
			72.7	0.16187	0.183489	0.00016968	0.00023193			72.7	0.194031	0.18909	4.2725e-05	8.667e-05			72.7	0.0451115	4.8037			72.7	0.000693	0.00063			72.7	0.222043	0.262136	0.211849			72.7	0.752633	0.0461178				72.7	0.993531	0.200834	0.172884				72.7	0.176602	0.229312
			72.8	0.16017	0.181777	0.0001709	0.00023193			72.8	0.192697	0.184931	4.2725e-05	8.667e-05			72.8	0.0451115	4.8037			72.8	0.000693	0.00063			72.8	0.213133	0.242447	0.208258			72.8	0.793045	0.0461178				72.8	0.989635	0.206358	0.171445				72.8	0.179233	0.229312
			72.9	0.16017	0.180065	0.00016968	0.00023315			72.9	0.194031	0.187011	4.2725e-05	8.667e-05			72.9	0.0433424	4.61531			72.9	0.000695	0.000631			72.9	0.222043	0.281825	0.206463			72.9	0.823701	0.0482689				72.9	0.993531	0.202675	0.172884				72.9	0.177917	0.2342
			73	0.15847	0.183489	0.00016968	0.0002356			73	0.194031	0.18909	4.3945e-05	8.667e-05			73	0.044227	4.7095			73	0.000695	0.00063			73	0.216103	0.286747	0.204668			73	0.879441	0.0493444				73	0.993531	0.2082	0.172884				73	0.180548	0.229312
			73.1	0.16527	0.181777	0.00016968	0.00023315			73.1	0.198035	0.18909	4.2725e-05	8.7891e-05			73.1	0.0451115	4.8037			73.1	0.000696	0.000629			73.1	0.216103	0.616534	0.208258			73.1	0.912885	0.0504199				73.1	0.992232	0.204517	0.174322				73.1	0.180548	0.227682
			73.2	0.16527	0.180065	0.00016968	0.00023315			73.2	0.1967	0.19325	4.3945e-05	8.7891e-05			73.2	0.0468807	4.99208			73.2	0.000695	0.000631			73.2	0.219073	0.326125	0.206463			73.2	0.935181	0.0504199				73.2	0.993531	0.206358	0.171445				73.2	0.180548	0.230941
			73.3	0.16527	0.181777	0.00016968	0.0002356			73.3	0.191362	0.19325	4.3945e-05	8.667e-05			73.3	0.0459961	4.89789			73.3	0.000693	0.00063			73.3	0.222043	0.222759	0.211849			73.3	0.940755	0.0536464				73.3	0.996129	0.204517	0.177199				73.3	0.180548	0.227682
			73.4	0.16527	0.181777	0.0001709	0.00023437			73.4	0.195366	0.203647	4.5166e-05	8.667e-05			73.4	0.044227	4.7095			73.4	0.000695	0.000631			73.4	0.216103	0.301514	0.211849			73.4	0.939362	0.0525709				73.4	0.993531	0.2082	0.177199				73.4	0.179233	0.230941
			73.5	0.16527	0.183489	0.0001709	0.00023437			73.5	0.198035	0.195329	4.5166e-05	8.667e-05			73.5	0.0459961	4.89789			73.5	0.000695	0.000634			73.5	0.219073	0.326125	0.211849			73.5	0.946329	0.0461178				73.5	0.99483	0.2082	0.178638				73.5	0.183179	0.229312
			73.6	0.16357	0.183489	0.00016968	0.0002356			73.6	0.200704	0.19325	4.7607e-05	8.667e-05			73.6	0.0451115	4.8037			73.6	0.000696	0.000631			73.6	0.216103	0.355658	0.213644			73.6	0.947723	0.0450423				73.6	0.996129	0.2082	0.175761				73.6	0.183179	0.229312
			73.7	0.16187	0.185201	0.00016968	0.0002356			73.7	0.195366	0.197409	5.4932e-05	8.667e-05			73.7	0.0477652	5.08628			73.7	0.000696	0.000631			73.7	0.216103	0.355658	0.217234			73.7	0.949116	0.0461178				73.7	0.99483	0.206358	0.177199				73.7	0.181864	0.232571
			73.8	0.16697	0.185201	0.0001709	0.00023804			73.8	0.198035	0.19117	6.3477e-05	8.7891e-05			73.8	0.0468807	4.99208			73.8	0.000695	0.000634			73.8	0.216103	0.326125	0.213644			73.8	0.953297	0.0471934				73.8	0.998727	0.206358	0.175761				73.8	0.184495	0.232571
			73.9	0.16527	0.188624	0.0001709	0.00023682			73.9	0.194031	0.18909	6.8359e-05	8.667e-05			73.9	0.0433424	4.61531			73.9	0.000696	0.000631			73.9	0.222043	0.321202	0.215439			73.9	0.95051	0.0471934				73.9	1.00003	0.204517	0.177199				73.9	0.180548	0.2342
			74	0.16697	0.190336	0.00016968	0.00023682			74	0.192697	0.195329	7.3242e-05	8.667e-05			74	0.0433424	4.61531			74	0.000696	0.000634			74	0.219073	0.350736	0.215439			74	0.953297	0.0482689				74	0.998727	0.2082	0.178638				74	0.180548	0.2342
			74.1	0.168671	0.188624	0.00016968	0.00023682			74.1	0.190028	0.195329	7.6904e-05	8.667e-05			74.1	0.044227	4.7095			74.1	0.000696	0.000638			74.1	0.216103	0.36058	0.215439			74.1	0.946329	0.0514954				74.1	0.997428	0.2082	0.174322				74.1	0.179233	0.23583
			74.2	0.168671	0.185201	0.00017212	0.00023804			74.2	0.187359	0.199488	8.0566e-05	8.667e-05			74.2	0.0477652	5.08628			74.2	0.000697	0.000646			74.2	0.222043	0.375347	0.210053			74.2	0.949116	0.0493444				74.2	0.998727	0.210041	0.174322				74.2	0.184495	0.237459
			74.3	0.16187	0.185201	0.00017212	0.00023804			74.3	0.186024	0.19325	8.5449e-05	8.667e-05			74.3	0.0486498	5.18047			74.3	0.000697	0.000643			74.3	0.222043	0.375347	0.213644			74.3	0.95051	0.0504199				74.3	1.00003	0.2082	0.172884				74.3	0.183179	0.2342
			74.4	0.16357	0.181777	0.0001709	0.00023804			74.4	0.187359	0.18909	8.7891e-05	8.7891e-05			74.4	0.0459961	4.89789			74.4	0.000697	0.00064			74.4	0.222043	0.355658	0.211849			74.4	0.953297	0.0493444				74.4	0.998727	0.210041	0.172884				74.4	0.18581	0.2342
			74.5	0.16357	0.181777	0.00016968	0.00023926			74.5	0.186024	0.19325	9.2773e-05	8.5449e-05			74.5	0.0433424	4.61531			74.5	0.000697	0.000632			74.5	0.227983	0.350736	0.217234			74.5	0.956084	0.0471934				74.5	0.997428	0.2082	0.171445				74.5	0.187125	0.239089
			74.6	0.16187	0.186912	0.00016846	0.00023804			74.6	0.191362	0.19325	9.7656e-05	8.5449e-05			74.6	0.0468807	4.99208			74.6	0.000698	0.000631			74.6	0.230953	0.340891	0.219029			74.6	0.956084	0.0514954				74.6	0.99483	0.210041	0.174322				74.6	0.181864	0.23583
			74.7	0.16357	0.186912	0.00017212	0.00023926			74.7	0.192697	0.197409	0.00010376	8.667e-05			74.7	0.0477652	5.08628			74.7	0.000696	0.000629			74.7	0.216103	0.340891	0.217234			74.7	0.956084	0.0514954				74.7	0.996129	0.2082	0.171445				74.7	0.18581	0.237459
			74.8	0.16357	0.186912	0.0001709	0.00024048			74.8	0.188693	0.197409	0.00011108	8.7891e-05			74.8	0.0495344	5.27466			74.8	0.000697	0.000632			74.8	0.225013	0.370424	0.219029			74.8	0.956084	0.0514954				74.8	0.997428	0.213724	0.172884				74.8	0.183179	0.237459
			74.9	0.16187	0.186912	0.0001709	0.00023926			74.9	0.187359	0.197409	0.00011597	8.667e-05			74.9	0.0459961	4.89789			74.9	0.000698	0.000629			74.9	0.230953	0.350736	0.220824			74.9	0.957477	0.0536464				74.9	0.998727	0.210041	0.174322				74.9	0.184495	0.232571
			75	0.16357	0.186912	0.00017212	0.00024536			75	0.191362	0.19117	0.00011841	8.667e-05			75	0.0468807	4.99208			75	0.000699	0.000621			75	0.222043	0.350736	0.222619			75	0.958871	0.0525709				75	1.00003	0.213724	0.174322				75	0.18581	0.242348
			75.1	0.16527	0.190336	0.0001709	0.00024292			75.1	0.190028	0.19117	0.00011963	8.667e-05			75.1	0.044227	4.7095			75.1	0.000699	0.000619			75.1	0.225013	0.326125	0.219029			75.1	0.965838	0.0536464				75.1	1.00003	0.210041	0.175761				75.1	0.187125	0.240719
			75.2	0.16527	0.195471	0.00017212	0.0002417			75.2	0.192697	0.19117	0.00012207	8.7891e-05			75.2	0.0459961	4.89789			75.2	0.000698	0.000624			75.2	0.233924	0.331047	0.217234			75.2	0.965838	0.0514954				75.2	0.998727	0.213724	0.174322				75.2	0.187125	0.240719
			75.3	0.16527	0.195471	0.0001709	0.00024292			75.3	0.191362	0.19325	0.00012329	8.667e-05			75.3	0.0468807	4.99208			75.3	0.000699	0.000629			75.3	0.227983	0.335969	0.217234			75.3	0.960264	0.0504199				75.3	0.998727	0.213724	0.178638				75.3	0.187125	0.240719
			75.4	0.16357	0.19376	0.0001709	0.00024292			75.4	0.190028	0.195329	0.00012207	8.667e-05			75.4	0.0486498	5.18047			75.4	0.000699	0.00063			75.4	0.222043	0.36058	0.219029			75.4	0.960264	0.0493444				75.4	1.00262	0.213724	0.175761				75.4	0.18581	0.237459
			75.5	0.16357	0.19376	0.00017212	0.00024414			75.5	0.191362	0.19325	0.00012451	8.5449e-05			75.5	0.0477652	5.08628			75.5	0.000699	0.000631			75.5	0.227983	0.365502	0.213644			75.5	0.961658	0.0504199				75.5	1.00392	0.211883	0.180076				75.5	0.188441	0.242348
			75.6	0.16527	0.19376	0.00017212	0.00024414			75.6	0.192697	0.197409	0.00012451	8.7891e-05			75.6	0.0451115	4.8037			75.6	0.000698	0.000631			75.6	0.236894	0.340891	0.220824			75.6	0.958871	0.0514954				75.6	1.00262	0.215566	0.172884				75.6	0.188441	0.240719
			75.7	0.16527	0.192048	0.0001709	0.00024414			75.7	0.194031	0.199488	0.00012695	8.7891e-05			75.7	0.0459961	4.89789			75.7	0.000699	0.000631			75.7	0.233924	0.335969	0.222619			75.7	0.965838	0.0525709				75.7	1.00262	0.215566	0.181514				75.7	0.189756	0.239089
			75.8	0.168671	0.192048	0.00016968	0.00024292			75.8	0.188693	0.203647	0.00012695	8.667e-05			75.8	0.0468807	4.99208			75.8	0.000701	0.000632			75.8	0.227983	0.331047	0.22621			75.8	0.971412	0.0536464				75.8	1.00522	0.213724	0.175761				75.8	0.184495	0.240719
			75.9	0.168671	0.192048	0.0001709	0.00024414			75.9	0.188693	0.199488	0.00012695	8.667e-05			75.9	0.0513035	5.46305			75.9	0.000701	0.000631			75.9	0.236894	0.350736	0.22621			75.9	0.967232	0.0525709				75.9	1.00392	0.219249	0.182953				75.9	0.18581	0.239089
			76	0.168671	0.192048	0.00017212	0.00024536			76	0.190028	0.199488	0.00012695	8.7891e-05			76	0.0513035	5.46305			76	0.000699	0.000631			76	0.230953	0.380269	0.22621			76	0.964445	0.0504199				76	1.00782	0.217407	0.181514				76	0.187125	0.240719
			76.1	0.168671	0.188624	0.00017334	0.00024536			76.1	0.191362	0.197409	0.00012695	8.667e-05			76.1	0.0504189	5.36886			76.1	0.000699	0.000631			76.1	0.222043	0.380269	0.219029			76.1	0.963051	0.0471934				76.1	1.00392	0.219249	0.184391				76.1	0.189756	0.240719
			76.2	0.16697	0.190336	0.0001709	0.00024536			76.2	0.195366	0.19325	0.00012817	8.7891e-05			76.2	0.0486498	5.18047			76.2	0.000698	0.000631			76.2	0.236894	0.36058	0.219029			76.2	0.960264	0.0471934				76.2	1.00262	0.215566	0.182953				76.2	0.192387	0.243978
			76.3	0.168671	0.190336	0.0001709	0.00024536			76.3	0.192697	0.19325	0.00012939	8.667e-05			76.3	0.0486498	5.18047			76.3	0.000698	0.000631			76.3	0.227983	0.350736	0.222619			76.3	0.965838	0.0471934				76.3	1.00262	0.215566	0.184391				76.3	0.188441	0.247237
			76.4	0.172071	0.192048	0.0001709	0.00024414			76.4	0.191362	0.197409	0.00012939	8.667e-05			76.4	0.0477652	5.08628			76.4	0.000699	0.000631			76.4	0.227983	0.36058	0.220824			76.4	0.967232	0.0471934				76.4	1.00262	0.217407	0.182953				76.4	0.191072	0.240719
			76.5	0.173771	0.192048	0.0001709	0.00024414			76.5	0.192697	0.197409	0.00013062	8.7891e-05			76.5	0.0513035	5.46305			76.5	0.000699	0.00063			76.5	0.233924	0.365502	0.222619			76.5	0.963051	0.0461178				76.5	1.00003	0.22109	0.181514				76.5	0.187125	0.242348
			76.6	0.170371	0.197183	0.0001709	0.00024414			76.6	0.195366	0.197409	0.00013062	8.667e-05			76.6	0.0504189	5.36886			76.6	0.000699	0.00063			76.6	0.236894	0.390113	0.222619			76.6	0.963051	0.0493444				76.6	1.00003	0.217407	0.18583				76.6	0.192387	0.243978
			76.7	0.172071	0.197183	0.0001709	0.00024658			76.7	0.191362	0.203647	0.00013184	8.667e-05			76.7	0.0477652	5.08628			76.7	0.000701	0.000631			76.7	0.230953	0.375347	0.22621			76.7	0.961658	0.0482689				76.7	1.00132	0.222931	0.182953				76.7	0.191072	0.240719
			76.8	0.172071	0.200607	0.00017212	0.00024536			76.8	0.192697	0.201568	0.00013184	8.667e-05			76.8	0.0486498	5.18047			76.8	0.000701	0.000634			76.8	0.230953	0.345813	0.224415			76.8	0.963051	0.0482689				76.8	1.00003	0.217407	0.187268				76.8	0.192387	0.240719
			76.9	0.173771	0.197183	0.00017212	0.00024658			76.9	0.194031	0.205727	0.00013428	8.667e-05			76.9	0.0486498	5.18047			76.9	0.000698	0.000631			76.9	0.239864	0.340891	0.228005			76.9	0.968625	0.0471934				76.9	1.00003	0.22109	0.18583				76.9	0.193702	0.242348
			77	0.175471	0.198895	0.00016968	0.00024536			77	0.195366	0.203647	0.00013428	8.7891e-05			77	0.0504189	5.36886			77	0.000699	0.00063			77	0.230953	0.340891	0.224415			77	0.968625	0.0471934				77		0.217407	0.184391				77	0.189756	0.242348
			77.1	0.175471	0.197183	0.0001709	0.00024536			77.1	0.199369	0.205727	0.00013428	8.7891e-05			77.1	0.0521881	5.55724			77.1	0.000701	0.000631			77.1	0.227983	0.370424	0.224415			77.1	0.965838	0.0471934				77.1		0.226614	0.187268				77.1	0.192387	0.245607
			77.2	0.177171	0.195471	0.0001709	0.00024536			77.2	0.198035	0.201568	0.0001355	8.9111e-05			77.2	0.0530726	5.65144			77.2	0.000701	0.000632			77.2	0.236894	0.390113	0.222619			77.2	0.965838	0.0461178				77.2		0.222931	0.184391				77.2	0.193702	0.240719
			77.3	0.172071	0.198895	0.00017212	0.0002478			77.3	0.195366	0.199488	0.0001355	8.9111e-05			77.3	0.0504189	5.36886			77.3	0.000699	0.000632			77.3	0.233924	0.36058	0.22621			77.3	0.968625	0.0450423				77.3		0.226614	0.188707				77.3	0.195018	0.243978
			77.4	0.173771	0.195471	0.0001709	0.0002478			77.4	0.1967	0.199488	0.0001355	8.7891e-05			77.4	0.0521881	5.55724			77.4	0.000699	0.000632			77.4	0.225013	0.345813	0.224415			77.4	0.971412	0.0482689				77.4		0.222931	0.184391				77.4	0.195018	0.242348
			77.5	0.175471	0.192048	0.00017212	0.00024658			77.5	0.1967	0.197409	0.0001355	8.7891e-05			77.5	0.0513035	5.46305			77.5	0.000701	0.000632			77.5	0.230953	0.340891	0.228005			77.5	0.972806	0.0493444				77.5		0.224773	0.188707				77.5	0.193702	0.243978
			77.6	0.177171	0.19376	0.0001709	0.00024536			77.6	0.198035	0.205727	0.00013428	8.7891e-05			77.6	0.0521881	5.55724			77.6	0.000702	0.000634			77.6	0.233924	0.345813	0.2298			77.6	0.970019	0.0514954				77.6		0.224773	0.18583				77.6	0.195018	0.247237
			77.7	0.177171	0.185201	0.00017212	0.00024658			77.7	0.1967	0.214045	0.00013672	8.667e-05			77.7	0.0557263	5.93402			77.7	0.000702	0.000635			77.7	0.227983	0.390113	0.2298			77.7	0.968625	0.0514954				77.7		0.230297	0.188707				77.7	0.191072	0.242348
			77.8	0.173771	0.192048	0.00017212	0.0002478			77.8	0.198035	0.220284	0.00013672	8.667e-05			77.8	0.0521881	5.55724			77.8	0.000702	0.000632			77.8	0.233924	0.365502	0.2298			77.8	0.971412	0.0504199				77.8		0.228456	0.187268				77.8	0.193702	0.243978
			77.9	0.173771	0.197183	0.00017212	0.0002478			77.9	0.198035	0.216125	0.00013794	8.7891e-05			77.9	0.0504189	5.36886			77.9	0.000701	0.000631			77.9	0.236894	0.335969	0.231595			77.9	0.975593	0.0493444				77.9		0.230297	0.190145				77.9	0.192387	0.245607
			78	0.175471	0.192048	0.0001709	0.0002478			78	0.199369	0.209886	0.00013916	8.9111e-05			78	0.0495344	5.27466			78	0.000702	0.000631			78	0.233924	0.335969	0.2298			78	0.97838	0.0471934				78		0.228456	0.190145				78	0.196333	0.243978
			78.1	0.175471	0.197183	0.00017212	0.0002478			78.1	0.199369	0.207807	0.00013794	8.7891e-05			78.1	0.0530726	5.65144			78.1	0.000701	0.000632			78.1	0.227983	0.350736	0.224415			78.1	0.981167	0.0482689				78.1		0.230297	0.187268				78.1	0.198964	0.250496
			78.2	0.175471	0.198895	0.00017212	0.00024902			78.2	0.198035	0.214045	0.0001416	8.667e-05			78.2	0.0530726	5.65144			78.2	0.000701	0.000631			78.2	0.248774	0.345813	0.2298			78.2	0.972806	0.0482689				78.2		0.228456	0.191584				78.2	0.193702	0.247237
			78.3	0.172071	0.200607	0.0001709	0.00024902			78.3	0.1967	0.216125	0.00014282	8.667e-05			78.3	0.0530726	5.65144			78.3	0.000701	0.00063			78.3	0.242834	0.385191	0.2298			78.3	0.970019	0.0504199				78.3		0.230297	0.191584				78.3	0.195018	0.247237
			78.4	0.175471	0.20403	0.0001709	0.00024902			78.4	0.198035	0.211966	0.00014404	8.7891e-05			78.4	0.0521881	5.55724			78.4	0.000699	0.000631			78.4	0.239864	0.365502	0.22621			78.4	0.974199	0.0504199				78.4		0.232139	0.194461				78.4	0.193702	0.250496
			78.5	0.170371	0.20403	0.00017212	0.00024902			78.5	0.208711	0.207807	0.00014404	8.667e-05			78.5	0.0513035	5.46305			78.5	0.000701	0.00063			78.5	0.251744	0.40488	0.231595			78.5	0.971412	0.0493444				78.5		0.232139	0.191584				78.5	0.198964	0.245607
			78.6	0.172071	0.202318	0.00017212	0.00025024			78.6	0.214049	0.203647	0.00014404	8.667e-05			78.6	0.0530726	5.65144			78.6	0.000701	0.000632			78.6	0.236894	0.459024	0.231595			78.6	0.970019	0.0504199				78.6		0.230297	0.191584				78.6	0.196333	0.250496
			78.7	0.172071	0.200607	0.00017212	0.00025146			78.7	0.208711	0.197409	0.00014404	8.7891e-05			78.7	0.0548418	5.83982			78.7	0.000701	0.000631			78.7	0.233924	0.552545	0.228005			78.7	0.972806	0.0461178				78.7		0.230297	0.188707				78.7	0.200279	0.252125
			78.8	0.173771	0.200607	0.00017212	0.00025024			78.8	0.208711	0.201568	0.00014648	8.7891e-05			78.8	0.0548418	5.83982			78.8	0.000701	0.00063			78.8	0.248774	0.552545	0.23339			78.8	0.968625	0.0514954				78.8		0.222931	0.191584				78.8	0.201595	0.248866
			78.9	0.170371	0.202318	0.0001709	0.00025146			78.9	0.210046	0.207807	0.00014648	8.7891e-05			78.9	0.0548418	5.83982			78.9	0.000702	0.000631			78.9	0.245804	0.478713	0.236981			78.9	0.965838	0.0493444				78.9		0.23398	0.193022				78.9	0.198964	0.250496
			79	0.170371	0.200607	0.00017212	0.00025146			79	0.210046	0.216125	0.00014648	8.667e-05			79	0.0557263	5.93402			79	0.000701	0.000631			79	0.242834	0.439335	0.236981			79	0.968625	0.0514954				79		0.232139	0.193022				79	0.201595	0.252125
			79.1	0.168671	0.197183	0.00017334	0.00025269			79.1	0.212715	0.222363	0.00014893	8.7891e-05			79.1	0.0557263	5.93402			79.1	0.000701	0.000631			79.1	0.251744	0.350736	0.235186			79.1	0.971412	0.0547219				79.1		0.230297	0.194461				79.1	0.200279	0.252125
			79.2	0.16697	0.198895	0.00017212	0.00025146			79.2	0.210046	0.214045	0.00015015	8.9111e-05			79.2	0.0566109	6.02821			79.2	0.000701	0.000631			79.2	0.245804	0.321202	0.23339			79.2	0.972806	0.0547219				79.2		0.230297	0.190145				79.2	0.20291	0.253755
			79.3	0.168671	0.198895	0.00017212	0.00025269			79.3	0.206042	0.203647	0.00015015	8.7891e-05			79.3	0.0592646	6.31079			79.3	0.000703	0.000632			79.3	0.236894	0.335969	0.228005			79.3	0.974199	0.0547219				79.3		0.228456	0.194461				79.3	0.20291	0.248866
			79.4	0.16697	0.198895	0.00017212	0.00025146			79.4	0.204708	0.205727	0.00015015	8.9111e-05			79.4	0.0566109	6.02821			79.4	0.000704	0.00063			79.4	0.248774	0.350736	0.231595			79.4	0.967232	0.0536464				79.4		0.226614	0.190145				79.4	0.204226	0.252125
			79.5	0.170371	0.198895	0.00017212	0.00025146			79.5	0.210046	0.203647	0.00015137	8.9111e-05			79.5	0.0557263	5.93402			79.5	0.000703	0.00063			79.5	0.248774	0.301514	0.23339			79.5	0.967232	0.0536464				79.5		0.23398	0.193022				79.5	0.20291	0.252125
			79.6	0.170371	0.20403	0.0001709	0.00025269			79.6	0.21138	0.209886	0.00015137	8.7891e-05			79.6	0.0566109	6.02821			79.6	0.000703	0.000631			79.6	0.245804	0.306436	0.235186			79.6	0.963051	0.0557974				79.6		0.237663	0.190145				79.6	0.198964	0.248866
			79.7	0.168671	0.202318	0.0001709	0.00025269			79.7	0.21138	0.218204	0.00015259	8.9111e-05			79.7	0.0574955	6.1224			79.7	0.000703	0.000632			79.7	0.248774	0.296591	0.23339			79.7	0.963051	0.0568729				79.7		0.235822	0.193022				79.7	0.20291	0.255385
			79.8	0.170371	0.202318	0.0001709	0.00025146			79.8	0.212715	0.211966	0.00015381	8.9111e-05			79.8	0.05838	6.21659			79.8	0.000703	0.000631			79.8	0.251744	0.365502	0.231595			79.8	0.964445	0.0568729				79.8		0.235822	0.191584				79.8	0.201595	0.248866
			79.9	0.170371	0.200607	0.0001709	0.00025391			79.9	0.215384	0.216125	0.00015259	8.9111e-05			79.9	0.0610337	6.49917			79.9	0.000704	0.000632			79.9	0.242834	0.419646	0.238776			79.9	0.967232	0.0568729				79.9		0.23398	0.190145				79.9	0.204226	0.252125
			80	0.170371	0.20403	0.00017334	0.00025391			80	0.21138	0.216125	0.00015503	8.9111e-05			80	0.05838	6.21659			80	0.000702	0.000631			80	0.248774	0.380269	0.238776			80	0.967232	0.0579484				80		0.23398	0.191584				80	0.201595	0.255385
			80.1	0.170371	0.205742	0.0001709	0.00025269			80.1	0.215384	0.216125	0.00015503	8.7891e-05			80.1	0.0574955	6.1224			80.1	0.000703	0.000631			80.1	0.251744	0.311358	0.235186			80.1	0.970019	0.0547219				80.1		0.23398	0.194461				80.1	0.198964	0.255385
			80.2	0.16697	0.207454	0.00017212	0.00025269			80.2	0.214049	0.211966	0.00015625	8.7891e-05			80.2	0.05838	6.21659			80.2	0.000703	0.000632			80.2	0.251744	0.365502	0.236981			80.2	0.971412	0.0557974				80.2		0.235822	0.195899				80.2	0.204226	0.257014
			80.3	0.16357	0.205742	0.00017212	0.00025391			80.3	0.198035	0.209886	0.00015625	8.7891e-05			80.3	0.05838	6.21659			80.3	0.000703	0.000631			80.3	0.248774	0.434413	0.235186			80.3	0.968625	0.0568729				80.3		0.23398	0.195899				80.3	0.20291	0.257014
			80.4	0.16187	0.200607	0.00017212	0.00025513			80.4	0.1967	0.205727	0.00015625	8.9111e-05			80.4	0.0601492	6.40498			80.4	0.000703	0.00063			80.4	0.254714	0.449179	0.23339			80.4	0.967232	0.0547219				80.4		0.237663	0.195899				80.4	0.205541	0.253755
			80.5	0.16527	0.202318	0.0001709	0.00025513			80.5	0.202039	0.203647	0.00015869	8.9111e-05			80.5	0.0592646	6.31079			80.5	0.000702	0.000632			80.5	0.248774	0.385191	0.236981			80.5	0.965838	0.0568729				80.5		0.235822	0.194461				80.5	0.205541	0.258644
			80.6	0.16697	0.202318	0.00017212	0.00025391			80.6	0.202039	0.199488	0.00015869	8.7891e-05			80.6	0.0566109	6.02821			80.6	0.000702	0.000631			80.6	0.242834	0.385191	0.231595			80.6	0.965838	0.0579484				80.6		0.23398	0.195899				80.6	0.206857	0.253755
			80.7	0.16697	0.202318	0.00017212	0.00025391			80.7	0.198035	0.203647	0.00015869	8.7891e-05			80.7	0.0566109	6.02821			80.7	0.000704	0.000631			80.7	0.254714	0.414724	0.236981			80.7	0.967232	0.0557974				80.7		0.235822	0.194461				80.7	0.205541	0.261903
			80.8	0.170371	0.202318	0.0001709	0.00025391			80.8	0.1967	0.214045	0.00015869	8.9111e-05			80.8	0.05838	6.21659			80.8	0.000704	0.000632			80.8	0.245804	0.424568	0.238776			80.8	0.970019	0.0557974				80.8		0.237663	0.200215				80.8	0.206857	0.257014
			80.9	0.173771	0.202318	0.00017334	0.00025391			80.9	0.1967	0.209886	0.00015869	8.7891e-05			80.9	0.0601492	6.40498			80.9	0.000703	0.000632			80.9	0.248774	0.459024	0.240571			80.9	0.967232	0.0536464				80.9		0.235822	0.198776				80.9	0.206857	0.257014
			81	0.172071	0.20403	0.0001709	0.00025513			81	0.202039	0.218204	0.00015869	9.0332e-05			81	0.0619183	6.59337			81	0.000704	0.000631			81	0.254714	0.449179	0.240571			81	0.967232	0.0547219				81		0.239505	0.197338				81	0.205541	0.258644
			81.1	0.172071	0.207454	0.0001709	0.00025391			81.1	0.200704	0.222363	0.00015869	8.7891e-05			81.1	0.0592646	6.31079			81.1	0.000703	0.000634			81.1	0.251744	0.463946	0.240571			81.1	0.964445	0.0525709				81.1		0.237663	0.198776				81.1	0.208172	0.253755
			81.2	0.175471	0.210877	0.00017212	0.00025513			81.2	0.198035	0.211966	0.00015991	8.667e-05			81.2	0.0601492	6.40498			81.2	0.000703	0.000632			81.2	0.245804	0.449179	0.238776			81.2	0.967232	0.0536464				81.2		0.237663	0.197338				81.2	0.208172	0.258644
			81.3	0.177171	0.210877	0.00017212	0.00025513			81.3	0.1967	0.205727	0.00015991	8.7891e-05			81.3	0.0592646	6.31079			81.3	0.000704	0.000634			81.3	0.257684	0.414724	0.238776			81.3	0.968625	0.0568729				81.3		0.235822	0.198776				81.3	0.209487	0.258644
			81.4	0.173771	0.214301	0.00017212	0.00025635			81.4	0.203373	0.199488	0.00015991	8.9111e-05			81.4	0.0610337	6.49917			81.4	0.000704	0.000634			81.4	0.257684	0.395035	0.242366			81.4	0.965838	0.0568729				81.4		0.237663	0.197338				81.4	0.206857	0.255385
			81.5	0.175471	0.207454	0.00017212	0.00025391			81.5	0.204708	0.211966	0.00016113	8.9111e-05			81.5	0.0628029	6.68756			81.5	0.000703	0.000631			81.5	0.254714	0.419646	0.238776			81.5	0.961658	0.0547219				81.5		0.237663	0.200215				81.5	0.206857	0.261903
			81.6	0.173771	0.209166	0.00017212	0.00025391			81.6	0.202039	0.205727	0.00016113	8.9111e-05			81.6	0.0654566	6.97014			81.6	0.000704	0.000632			81.6	0.260654	0.439335	0.238776			81.6	0.958871	0.0547219				81.6		0.241346	0.198776				81.6	0.210803	0.258644
			81.7	0.173771	0.207454	0.00017212	0.00025513			81.7	0.203373	0.201568	0.00015991	8.7891e-05			81.7	0.0628029	6.68756			81.7	0.000704	0.000634			81.7	0.257684	0.409802	0.242366			81.7	0.960264	0.0536464				81.7		0.239505	0.201653				81.7	0.208172	0.258644
			81.8	0.175471	0.205742	0.00017212	0.00025513			81.8	0.203373	0.203647	0.00016235	8.7891e-05			81.8	0.0610337	6.49917			81.8	0.000704	0.000634			81.8	0.248774	0.375347	0.238776			81.8	0.960264	0.0536464				81.8		0.239505	0.195899				81.8	0.212118	0.263532
			81.9	0.177171	0.202318	0.0001709	0.00025391			81.9	0.204708	0.205727	0.00016235	8.9111e-05			81.9	0.0601492	6.40498			81.9	0.000704	0.000632			81.9	0.251744	0.390113	0.238776			81.9	0.961658	0.0568729				81.9		0.237663	0.200215				81.9	0.208172	0.263532
			82	0.177171	0.20403	0.00017212	0.00025513			82	0.207377	0.214045	0.00016235	8.9111e-05			82	0.0601492	6.40498			82	0.000704	0.000632			82	0.263624	0.51809	0.244161			82	0.964445	0.0557974				82		0.241346	0.195899				82	0.209487	0.263532
			82.1	0.178871	0.20403	0.00017212	0.00025513			82.1	0.203373	0.216125	0.00016235	8.9111e-05			82.1	0.0636874	6.78175			82.1	0.000706	0.000632			82.1	0.257684	0.685444	0.244161			82.1	0.967232	0.0547219				82.1		0.241346	0.197338				82.1	0.208172	0.265162
			82.2	0.178871	0.209166	0.00017212	0.00025635			82.2	0.214049	0.216125	0.00016235	8.9111e-05			82.2	0.0619183	6.59337			82.2	0.000704	0.000631			82.2	0.251744	1.01031	0.247752			82.2	0.964445	0.0547219				82.2		0.239505	0.200215				82.2	0.208172	0.265162
			82.3	0.177171	0.210877	0.00017334	0.00025757			82.3	0.212715	0.209886	0.00016357	8.9111e-05			82.3	0.0610337	6.49917			82.3	0.000706	0.000634			82.3	0.257684	1.06445	0.247752			82.3	0.961658	0.0536464				82.3		0.239505	0.198776				82.3	0.209487	0.266792
			82.4	0.177171	0.209166	0.00017212	0.00025635			82.4	0.215384	0.207807	0.00016235	9.0332e-05			82.4	0.0628029	6.68756			82.4	0.000706	0.000634			82.4	0.257684	0.936476	0.247752			82.4	0.964445	0.0525709				82.4		0.243187	0.201653				82.4	0.208172	0.263532
			82.5	0.173771	0.210877	0.00017212	0.00025635			82.5	0.212715	0.209886	0.00016357	8.9111e-05			82.5	0.0672257	7.15853			82.5	0.000706	0.000634			82.5	0.251744	0.980776	0.242366			82.5	0.965838	0.0536464				82.5		0.241346	0.200215				82.5	0.213434	0.266792
			82.6	0.175471	0.214301	0.00017212	0.00025513			82.6	0.212715	0.207807	0.00016113	8.7891e-05			82.6	0.0654566	6.97014			82.6	0.000706	0.000634			82.6	0.257684	1.06938	0.245956			82.6	0.967232	0.0557974				82.6		0.239505	0.203092				82.6	0.208172	0.265162
			82.7	0.178871	0.214301	0.00017334	0.00025757			82.7	0.214049	0.207807	0.00016479	8.667e-05			82.7	0.064572	6.87595			82.7	0.000706	0.000634			82.7	0.260654	1.17274	0.242366			82.7	0.967232	0.0557974				82.7		0.243187	0.200215				82.7	0.213434	0.263532
			82.8	0.177171	0.212589	0.00017212	0.00025757			82.8	0.215384	0.216125	0.00016357	8.7891e-05			82.8	0.0636874	6.78175			82.8	0.000707	0.000632			82.8	0.257684	1.10383	0.240571			82.8	0.961658	0.0557974				82.8		0.241346	0.205969				82.8	0.209487	0.266792
			82.9	0.178871	0.216013	0.00017212	0.00025635			82.9	0.210046	0.211966	0.00016357	8.9111e-05			82.9	0.0619183	6.59337			82.9	0.000708	0.000632			82.9	0.257684	0.980776	0.242366			82.9	0.961658	0.0525709				82.9		0.241346	0.200215				82.9	0.212118	0.260273
			83	0.180571	0.210877	0.00017334	0.00025635			83	0.206042	0.207807	0.00016357	8.7891e-05			83	0.0610337	6.49917			83	0.000707	0.000634			83	0.263624	0.847877	0.249547			83	0.975593	0.0536464				83		0.241346	0.197338				83	0.213434	0.268421
			83.1	0.178871	0.209166	0.00017334	0.00025757			83.1	0.202039	0.211966	0.00016357	8.7891e-05			83.1	0.0619183	6.59337			83.1	0.000706	0.000632			83.1	0.254714	0.818344	0.245956			83.1	0.995102	0.0547219				83.1		0.239505	0.201653				83.1	0.210803	0.270051
			83.2	0.182271	0.210877	0.00017212	0.00025879			83.2	0.203373	0.222363	0.00016602	8.7891e-05			83.2	0.0654566	6.97014			83.2	0.000707	0.000631			83.2	0.263624	0.78881	0.249547			83.2	0.997889	0.0547219				83.2		0.245029	0.201653				83.2	0.214749	0.270051
			83.3	0.180571	0.210877	0.00017212	0.00025879			83.3	0.204708	0.220284	0.00016479	8.9111e-05			83.3	0.0654566	6.97014			83.3	0.000707	0.000632			83.3	0.269565	0.828188	0.251342			83.3	0.990921	0.0568729				83.3		0.248712	0.201653				83.3	0.213434	0.270051
			83.4	0.182271	0.212589	0.00017456	0.00025879			83.4	0.207377	0.216125	0.00016479	8.9111e-05			83.4	0.0610337	6.49917			83.4	0.000708	0.000634			83.4	0.260654	0.897099	0.247752			83.4	0.989528	0.0579484				83.4		0.245029	0.201653				83.4	0.214749	0.266792
			83.5	0.182271	0.207454	0.00017456	0.00026001			83.5	0.21138	0.218204	0.00016602	9.0332e-05			83.5	0.0619183	6.59337			83.5	0.000708	0.000632			83.5	0.260654	1.2072	0.245956			83.5	0.988134	0.0557974				83.5		0.24687	0.205969				83.5	0.212118	0.268421
			83.6	0.183971	0.209166	0.00017334	0.00025757			83.6	0.204708	0.214045	0.00016479	8.9111e-05			83.6	0.0619183	6.59337			83.6	0.000708	0.000632			83.6	0.272535	1.2072	0.245956			83.6	0.992315	0.0514954				83.6		0.243187	0.201653				83.6	0.213434	0.268421
			83.7	0.183971	0.205742	0.00017212	0.00025879			83.7	0.204708	0.216125	0.00016724	9.0332e-05			83.7	0.064572	6.87595			83.7	0.000707	0.000631			83.7	0.263624	1.00046	0.245956			83.7	0.995102	0.0579484				83.7		0.241346	0.20453				83.7	0.21738	0.265162
			83.8	0.183971	0.210877	0.00017212	0.00025757			83.8	0.212715	0.207807	0.00016479	8.9111e-05			83.8	0.0636874	6.78175			83.8	0.000708	0.000632			83.8	0.254714	0.951243	0.247752			83.8	0.995102	0.0557974				83.8		0.243187	0.20453				83.8	0.212118	0.270051
			83.9	0.183971	0.214301	0.00017334	0.00025879			83.9	0.208711	0.209886	0.00016602	8.7891e-05			83.9	0.064572	6.87595			83.9	0.000708	0.000634			83.9	0.263624	0.867566	0.244161			83.9	0.989528	0.0557974				83.9		0.24687	0.203092				83.9	0.218695	0.266792
			84	0.189071	0.210877	0.00017456	0.00025879			84	0.204708	0.211966	0.00016724	8.7891e-05			84	0.0628029	6.68756			84	0.000709	0.000632			84	0.260654	0.931554	0.249547			84	0.985347	0.0579484				84		0.241346	0.205969				84	0.213434	0.270051
			84.1	0.185671	0.217724	0.00017212	0.00025879			84.1	0.203373	0.218204	0.00016846	8.7891e-05			84.1	0.064572	6.87595			84.1	0.000707	0.000634			84.1	0.254714	0.995542	0.247752			84.1	0.986741	0.0536464				84.1		0.245029	0.207407				84.1	0.216064	0.266792
			84.2	0.185671	0.216013	0.00017212	0.00025757			84.2	0.204708	0.214045	0.00016846	8.9111e-05			84.2	0.0636874	6.78175			84.2	0.000708	0.000634			84.2	0.257684	0.980776	0.245956			84.2	0.988134	0.0493444				84.2		0.243187	0.20453				84.2	0.216064	0.268421
			84.3	0.187371	0.214301	0.00017334	0.00025879			84.3	0.207377	0.218204	0.00016724	8.7891e-05			84.3	0.064572	6.87595			84.3	0.000708	0.000632			84.3	0.263624	0.867566	0.249547			84.3	0.990921	0.0493444				84.3		0.245029	0.207407				84.3	0.213434	0.270051
			84.4	0.187371	0.216013	0.00017334	0.00025757			84.4	0.200704	0.224443	0.00016846	8.9111e-05			84.4	0.064572	6.87595			84.4	0.000709	0.000635			84.4	0.254714	0.710055	0.247752			84.4	0.990921	0.0536464				84.4		0.243187	0.205969				84.4	0.21738	0.268421
			84.5	0.190771	0.212589	0.00017212	0.00025879			84.5	0.200704	0.224443	0.00016968	8.7891e-05			84.5	0.064572	6.87595			84.5	0.000708	0.000634			84.5	0.263624	0.882332	0.253137			84.5	0.990921	0.0568729				84.5		0.24687	0.205969				84.5	0.216064	0.27168
			84.6	0.187371	0.212589	0.00017212	0.00026001			84.6	0.203373	0.222363	0.00016846	8.9111e-05			84.6	0.0628029	6.68756			84.6	0.000707	0.000634			84.6	0.263624	0.906943	0.251342			84.6	0.988134	0.0557974				84.6		0.24687	0.210284				84.6	0.218695	0.270051
			84.7	0.185671	0.212589	0.00017334	0.00026001			84.7	0.208711	0.220284	0.00016846	8.9111e-05			84.7	0.0628029	6.68756			84.7	0.000709	0.000634			84.7	0.260654	0.966009	0.251342			84.7	0.999282	0.0579484				84.7		0.248712	0.20453				84.7	0.21738	0.270051
			84.8	0.185671	0.212589	0.00017334	0.00026001			84.8	0.21138	0.216125	0.00016846	8.7891e-05			84.8	0.064572	6.87595			84.8	0.000709	0.000635			84.8	0.260654	0.946321	0.249547			84.8	1.00486	0.0568729				84.8		0.248712	0.205969				84.8	0.216064	0.27331
			84.9	0.183971	0.210877	0.00017334	0.00026123			84.9	0.207377	0.216125	0.00016846	8.7891e-05			84.9	0.0663411	7.06433			84.9	0.000709	0.000635			84.9	0.266594	0.936476	0.249547			84.9	1.00625	0.0525709				84.9		0.248712	0.203092				84.9	0.220011	0.268421
			85	0.182271	0.214301	0.00017334	0.00026001			85	0.206042	0.214045	0.00016968	8.9111e-05			85	0.064572	6.87595			85	0.000709	0.000632			85	0.254714	0.966009	0.247752			85	1.00207	0.0525709				85		0.24687	0.207407				85	0.216064	0.268421
			85.1	0.182271	0.219436	0.00017334	0.00026001			85.1	0.208711	0.211966	0.00016968	8.9111e-05			85.1	0.0636874	6.78175			85.1	0.00071	0.000634			85.1	0.263624	0.941398	0.247752			85.1	1.00068	0.0514954				85.1		0.250553	0.207407				85.1	0.220011	0.27168
			85.2	0.185671	0.219436	0.00017334	0.00026123			85.2	0.216719	0.214045	0.0001709	8.9111e-05			85.2	0.0654566	6.97014			85.2	0.00071	0.000635			85.2	0.269565	0.941398	0.253137			85.2	1.00207	0.0525709				85.2		0.248712	0.205969				85.2	0.216064	0.270051
			85.3	0.183971	0.217724	0.00017456	0.00026245			85.3	0.207377	0.218204	0.00017578	9.0332e-05			85.3	0.0636874	6.78175			85.3	0.00071	0.000635			85.3	0.260654	0.926632	0.254932			85.3	1.00068	0.0536464				85.3		0.250553	0.207407				85.3	0.218695	0.27168
			85.4	0.185671	0.221148	0.00017334	0.00026123			85.4	0.206042	0.218204	0.000177	9.0332e-05			85.4	0.0681103	7.25272			85.4	0.00071	0.000635			85.4	0.260654	0.941398	0.249547			85.4	1.00346	0.0514954				85.4		0.24687	0.205969				85.4	0.216064	0.27168
			85.5	0.183971	0.217724	0.00017334	0.00026245			85.5	0.206042	0.222363	0.00017822	8.9111e-05			85.5	0.0681103	7.25272			85.5	0.000709	0.000635			85.5	0.269565	0.966009	0.253137			85.5	1.00764	0.0536464				85.5		0.248712	0.207407				85.5	0.214749	0.270051
			85.6	0.185671	0.216013	0.00017334	0.00026245			85.6	0.206042	0.222363	0.000177	8.9111e-05			85.6	0.0663411	7.06433			85.6	0.00071	0.000635			85.6	0.266594	0.966009	0.256727			85.6	1.00764	0.0557974				85.6		0.24687	0.205969				85.6	0.21738	0.274939
			85.7	0.185671	0.216013	0.00017334	0.00026245			85.7	0.210046	0.224443	0.000177	8.9111e-05			85.7	0.0654566	6.97014			85.7	0.000709	0.000636			85.7	0.260654	0.956165	0.256727			85.7	1.00486	0.0557974				85.7		0.252395	0.211723				85.7	0.21738	0.27331
			85.8	0.185671	0.214301	0.00017456	0.00026245			85.8	0.208711	0.220284	0.000177	8.9111e-05			85.8	0.0636874	6.78175			85.8	0.000709	0.000637			85.8	0.272535	0.941398	0.256727			85.8	1.00207	0.0557974				85.8		0.250553	0.208846				85.8	0.222642	0.276569
			85.9	0.187371	0.212589	0.00017334	0.00026245			85.9	0.204708	0.220284	0.00017456	8.9111e-05			85.9	0.0663411	7.06433			85.9	0.00071	0.000632			85.9	0.260654	0.946321	0.253137			85.9	1.00486	0.0514954				85.9		0.257919	0.211723				85.9	0.218695	0.27331
			86	0.183971	0.214301	0.00017334	0.00026245			86	0.207377	0.216125	0.00017212	8.9111e-05			86	0.0672257	7.15853			86	0.000712	0.000635			86	0.263624	0.941398	0.247752			86	1.00764	0.0514954				86		0.252395	0.210284				86	0.221326	0.27331
			86.1	0.185671	0.214301	0.00017334	0.00026245			86.1	0.212715	0.216125	0.00017212	8.9111e-05			86.1	0.0681103	7.25272			86.1	0.000712	0.000634			86.1	0.275505	0.966009	0.249547			86.1	1.01043	0.0482689				86.1		0.254236	0.210284				86.1	0.221326	0.279828
			86.2	0.183971	0.214301	0.00017212	0.00026245			86.2	0.208711	0.222363	0.00017212	8.9111e-05			86.2	0.064572	6.87595			86.2	0.00071	0.000635			86.2	0.272535	0.980776	0.251342			86.2	1.00904	0.0493444				86.2		0.250553	0.210284				86.2	0.220011	0.274939
			86.3	0.183971	0.219436	0.00017334	0.00026245			86.3	0.208711	0.224443	0.00017334	9.0332e-05			86.3	0.0654566	6.97014			86.3	0.000712	0.000634			86.3	0.263624	0.980776	0.249547			86.3	1.00346	0.0514954				86.3		0.256078	0.216038				86.3	0.220011	0.279828
			86.4	0.185671	0.219436	0.00017334	0.00026245			86.4	0.207377	0.228602	0.00017334	8.9111e-05			86.4	0.0663411	7.06433			86.4	0.00071	0.000632			86.4	0.272535	0.951243	0.253137			86.4	0.999282	0.0547219				86.4		0.252395	0.2146				86.4	0.222642	0.279828
			86.5	0.182271	0.221148	0.00017456	0.00026367			86.5	0.21138	0.232761	0.00017334	9.0332e-05			86.5	0.0672257	7.15853			86.5	0.000712	0.000634			86.5	0.272535	0.956165	0.254932			86.5	1.00346	0.0557974				86.5		0.256078	0.216038				86.5	0.225272	0.278198
			86.6	0.185671	0.224572	0.00017334	0.00026367			86.6	0.214049	0.230682	0.00017212	9.0332e-05			86.6	0.070764	7.5353			86.6	0.000712	0.000634			86.6	0.272535	0.975854	0.254932			86.6	1.00207	0.0568729				86.6		0.254236	0.213161				86.6	0.222642	0.283087
			86.7	0.187371	0.226283	0.00017334	0.00026245			86.7	0.21138	0.226523	0.00017334	9.0332e-05			86.7	0.0681103	7.25272			86.7	0.00071	0.000634			86.7	0.272535	1.02015	0.256727			86.7	1.00486	0.0579484				86.7		0.252395	0.211723				86.7	0.225272	0.279828
			86.8	0.189071	0.22286	0.00017212	0.00026245			86.8	0.210046	0.226523	0.00017334	9.1553e-05			86.8	0.064572	6.87595			86.8	0.000712	0.000634			86.8	0.281445	1.01031	0.260318			86.8	1.00486	0.0514954				86.8		0.254236	0.211723				86.8	0.226588	0.281458
			86.9	0.189071	0.22286	0.00017334	0.00026489			86.9	0.21138	0.224443	0.00017456	8.9111e-05			86.9	0.0663411	7.06433			86.9	0.000712	0.000635			86.9	0.272535	0.995542	0.258523			86.9	1.00207	0.0525709				86.9		0.250553	0.211723				86.9	0.222642	0.284717
			87	0.190771	0.219436	0.00017334	0.00026489			87	0.212715	0.228602	0.00017212	9.0332e-05			87	0.0672257	7.15853			87	0.000712	0.000635			87	0.269565	0.980776	0.258523			87	1.00068	0.0450423				87		0.252395	0.213161				87	0.225272	0.281458
			87.1	0.187371	0.219436	0.00017334	0.00026489			87.1	0.218053	0.222363	0.00017456	8.9111e-05			87.1	0.0698794	7.4411			87.1	0.00071	0.000634			87.1	0.272535	0.985698	0.254932			87.1	0.996495	0.0450423				87.1		0.254236	0.210284				87.1	0.225272	0.284717
			87.2	0.183971	0.219436	0.00017334	0.00026489			87.2	0.214049	0.222363	0.00017456	9.0332e-05			87.2	0.070764	7.5353			87.2	0.00071	0.000635			87.2	0.269565	1.00539	0.256727			87.2	0.997889	0.0450423				87.2		0.254236	0.213161				87.2	0.225272	0.279828
			87.3	0.189071	0.219436	0.00017334	0.00026367			87.3	0.214049	0.220284	0.00017456	8.9111e-05			87.3	0.0698794	7.4411			87.3	0.000712	0.000634			87.3	0.266594	1.02015	0.254932			87.3	0.999282	0.0504199				87.3		0.256078	0.207407				87.3	0.226588	0.281458
			87.4	0.187371	0.219436	0.00017334	0.00026489			87.4	0.21138	0.226523	0.00017456	9.0332e-05			87.4	0.0681103	7.25272			87.4	0.000712	0.000635			87.4	0.269565	1.02015	0.253137			87.4	1.00486	0.0504199				87.4		0.254236	0.210284				87.4	0.225272	0.284717
			87.5	0.187371	0.221148	0.00017334	0.00026611			87.5	0.214049	0.228602	0.00017456	9.0332e-05			87.5	0.0672257	7.15853			87.5	0.000712	0.000634			87.5	0.266594	0.995542	0.253137			87.5	1.00486	0.0568729				87.5		0.256078	0.210284				87.5	0.223957	0.283087
			87.6	0.187371	0.224572	0.00017334	0.00026611			87.6	0.214049	0.230682	0.00017456	9.0332e-05			87.6	0.0672257	7.15853			87.6	0.000712	0.000635			87.6	0.263624	0.966009	0.247752			87.6	1.00207	0.0622505				87.6		0.257919	0.210284				87.6	0.222642	0.284717
			87.7	0.185671	0.221148	0.00017334	0.00026489			87.7	0.21138	0.23692	0.00017578	9.0332e-05			87.7	0.0681103	7.25272			87.7	0.000712	0.000634			87.7	0.275505	0.985698	0.253137			87.7	0.996495	0.0644015				87.7		0.256078	0.211723				87.7	0.225272	0.286346
			87.8	0.187371	0.224572	0.00017334	0.00026611			87.8	0.210046	0.247318	0.00017578	9.0332e-05			87.8	0.0698794	7.4411			87.8	0.000713	0.000635			87.8	0.275505	1.02015	0.254932			87.8	1.00346	0.061175				87.8		0.259761	0.210284				87.8	0.222642	0.281458
			87.9	0.190771	0.226283	0.00017456	0.00026611			87.9	0.21138	0.249398	0.00017456	9.0332e-05			87.9	0.0672257	7.15853			87.9	0.000713	0.000636			87.9	0.272535	1.03984	0.258523			87.9	1.00346	0.063326				87.9		0.254236	0.208846				87.9	0.226588	0.286346
			88	0.190771	0.226283	0.00017334	0.00026611			88	0.216719	0.245239	0.00017456	9.0332e-05			88	0.0681103	7.25272			88	0.000712	0.000635			88	0.272535	1.05461	0.258523			88	1.00486	0.0600995				88		0.256078	0.211723				88	0.225272	0.286346
			88.1	0.190771	0.229707	0.00017456	0.00026611			88.1	0.212715	0.249398	0.00017578	9.0332e-05			88.1	0.0663411	7.06433			88.1	0.000713	0.000634			88.1	0.272535	1.01031	0.253137			88.1	1.00346	0.0644015				88.1		0.256078	0.216038				88.1	0.226588	0.287976
			88.2	0.194171	0.224572	0.00017334	0.00026611			88.2	0.210046	0.243159	0.00017578	9.0332e-05			88.2	0.0698794	7.4411			88.2	0.000713	0.000635			88.2	0.266594	0.995542	0.253137			88.2	0.999282	0.065477				88.2		0.257919	0.216038				88.2	0.230534	0.289605
			88.3	0.192471	0.22286	0.00017578	0.00026733			88.3	0.208711	0.243159	0.00017578	9.0332e-05			88.3	0.0725331	7.72368			88.3	0.000713	0.000636			88.3	0.272535	1.00539	0.253137			88.3	0.996495	0.0644015				88.3		0.254236	0.218915				88.3	0.229219	0.283087
			88.4	0.189071	0.22286	0.00017334	0.00026733			88.4	0.214049	0.228602	0.000177	8.9111e-05			88.4	0.070764	7.5353			88.4	0.000714	0.000635			88.4	0.275505	1.03	0.258523			88.4	1.00068	0.063326				88.4		0.259761	0.220354				88.4	0.230534	0.284717
			88.5	0.192471	0.224572	0.00017456	0.00026611			88.5	0.216719	0.224443	0.000177	9.0332e-05			88.5	0.0681103	7.25272			88.5	0.000714	0.000635			88.5	0.269565	1.00046	0.253137			88.5	1.00068	0.0622505				88.5		0.254236	0.217477				88.5	0.226588	0.284717
			88.6	0.194171	0.22286	0.00017456	0.00026733			88.6	0.215384	0.224443	0.00017578	8.9111e-05			88.6	0.0689948	7.34691			88.6	0.000714	0.000636			88.6	0.272535	0.99062	0.256727			88.6	1.00625	0.0622505				88.6		0.256078	0.221792				88.6	0.230534	0.287976
			88.7	0.195871	0.22286	0.00017456	0.00026611			88.7	0.212715	0.230682	0.000177	9.0332e-05			88.7	0.0672257	7.15853			88.7	0.000713	0.000635			88.7	0.278475	0.975854	0.254932			88.7	1.00346	0.0622505				88.7		0.256078	0.218915				88.7	0.229219	0.289605
			88.8	0.194171	0.226283	0.00017456	0.00026733			88.8	0.212715	0.230682	0.000177	9.0332e-05			88.8	0.0672257	7.15853			88.8	0.000714	0.000636			88.8	0.266594	0.995542	0.256727			88.8	0.999282	0.067628				88.8		0.259761	0.217477				88.8	0.231849	0.289605
			88.9	0.195871	0.226283	0.00017456	0.00026611			88.9	0.215384	0.23692	0.000177	9.0332e-05			88.9	0.070764	7.5353			88.9	0.000713	0.000636			88.9	0.269565	1.01523	0.258523			88.9	0.995102	0.067628				88.9		0.257919	0.217477				88.9	0.230534	0.291235
			89	0.194171	0.224572	0.00017456	0.00026611			89	0.214049	0.24108	0.000177	9.0332e-05			89	0.0681103	7.25272			89	0.000713	0.000635			89	0.284415	1.04969	0.260318			89	0.996495	0.069779				89		0.261602	0.223231				89	0.233165	0.289605
			89.1	0.195871	0.226283	0.00017334	0.00026855			89.1	0.216719	0.228602	0.00017822	8.9111e-05			89.1	0.0672257	7.15853			89.1	0.000714	0.000636			89.1	0.281445	1.01031	0.258523			89.1	1.00068	0.069779				89.1		0.259761	0.217477				89.1	0.233165	0.287976
			89.2	0.195871	0.224572	0.00017334	0.00026733			89.2	0.218053	0.234841	0.00017822	9.0332e-05			89.2	0.0654566	6.97014			89.2	0.000715	0.000636			89.2	0.281445	1.00046	0.260318			89.2	1.00486	0.069779				89.2		0.261602	0.220354				89.2	0.233165	0.294494
			89.3	0.195871	0.229707	0.00017456	0.00026733			89.3	0.212715	0.232761	0.00017822	9.0332e-05			89.3	0.0654566	6.97014			89.3	0.000715	0.000636			89.3	0.284415	0.966009	0.258523			89.3	1.00346	0.0687035				89.3		0.257919	0.220354				89.3	0.231849	0.291235
			89.4	0.197572	0.231419	0.00017334	0.00026611			89.4	0.222057	0.234841	0.000177	9.0332e-05			89.4	0.0681103	7.25272			89.4	0.000715	0.000636			89.4	0.284415	0.995542	0.254932			89.4	1.00346	0.0708546				89.4		0.263444	0.218915				89.4	0.231849	0.294494
			89.5	0.197572	0.23313	0.00017456	0.00026733			89.5	0.216719	0.24108	0.00017822	9.1553e-05			89.5	0.0698794	7.4411			89.5	0.000714	0.000636			89.5	0.278475	1.00539	0.256727			89.5	1.00346	0.0740811				89.5		0.257919	0.220354				89.5	0.23448	0.291235
			89.6	0.195871	0.231419	0.00017456	0.00026733			89.6	0.215384	0.23692	0.00017822	9.0332e-05			89.6	0.0689948	7.34691			89.6	0.000717	0.000637			89.6	0.287385	1.01031	0.256727			89.6	1.00068	0.0762321				89.6		0.265285	0.218915				89.6	0.23448	0.289605
			89.7	0.197572	0.229707	0.00017456	0.00026855			89.7	0.218053	0.230682	0.00017822	9.0332e-05			89.7	0.0681103	7.25272			89.7	0.000717	0.000636			89.7	0.290355	1.00046	0.260318			89.7	1.00486	0.0730056				89.7		0.261602	0.220354				89.7	0.235796	0.292864
			89.8	0.199272	0.226283	0.00017334	0.00026733			89.8	0.219388	0.228602	0.00017944	9.0332e-05			89.8	0.0672257	7.15853			89.8	0.000715	0.000637			89.8	0.284415	0.970932	0.256727			89.8	0.999282	0.0762321				89.8		0.263444	0.217477				89.8	0.23448	0.292864
			89.9	0.200972	0.227995	0.00017456	0.00026733			89.9	0.215384	0.234841	0.00017944	9.0332e-05			89.9	0.0681103	7.25272			89.9	0.000715	0.000637			89.9	0.290355	1.00539	0.262113			89.9	1.00068	0.0751566				89.9		0.257919	0.224669				89.9	0.231849	0.296124
			90	0.202672	0.227995	0.00017578	0.00026978			90	0.220722	0.232761	0.00017944	8.9111e-05			90	0.0681103	7.25272			90	0.000718	0.000637			90	0.287385	1.02015	0.260318			90	0.999282	0.0730056				90		0.265285	0.218915				90	0.235796	0.296124
			90.1	0.202672	0.229707	0.00017456	0.00026855			90.1	0.216719	0.230682	0.00017822	8.9111e-05			90.1	0.0698794	7.4411			90.1	0.000718	0.000638			90.1	0.278475	1.02015	0.260318			90.1	0.997889	0.069779				90.1		0.263444	0.220354				90.1	0.237111	0.291235
			90.2	0.199272	0.229707	0.00017456	0.00026855			90.2	0.218053	0.239	0.00018066	8.9111e-05			90.2	0.0689948	7.34691			90.2	0.000719	0.000637			90.2	0.287385	0.995542	0.265703			90.2	0.995102	0.0730056				90.2		0.265285	0.221792				90.2	0.237111	0.299383
			90.3	0.202672	0.23313	0.00017456	0.00026855			90.3	0.220722	0.253557	0.00017944	9.0332e-05			90.3	0.0689948	7.34691			90.3	0.000717	0.000636			90.3	0.293325	0.995542	0.265703			90.3	1.00068	0.0751566				90.3		0.261602	0.223231				90.3	0.239742	0.296124
			90.4	0.200972	0.23313	0.00017578	0.00026855			90.4	0.218053	0.232761	0.00017944	9.0332e-05			90.4	0.0716486	7.62949			90.4	0.000718	0.000637			90.4	0.284415	0.99062	0.263908			90.4	1.00068	0.0773076				90.4		0.265285	0.221792				90.4	0.238426	0.299383
			90.5	0.204372	0.229707	0.00017334	0.00026978			90.5	0.224726	0.232761	0.00017944	9.0332e-05			90.5	0.0716486	7.62949			90.5	0.000718	0.000637			90.5	0.290355	1.00046	0.262113			90.5	0.999282	0.0773076				90.5		0.257919	0.223231				90.5	0.241057	0.297753
			90.6	0.202672	0.231419	0.00017334	0.00026978			90.6	0.231398	0.232761	0.00017944	8.9111e-05			90.6	0.070764	7.5353			90.6	0.000718	0.000638			90.6	0.293325	1.02508	0.256727			90.6	1.00068	0.0740811				90.6		0.261602	0.226108				90.6	0.235796	0.294494
			90.7	0.199272	0.23313	0.00017334	0.00026855			90.7	0.231398	0.234841	0.00018066	9.0332e-05			90.7	0.0698794	7.4411			90.7	0.000719	0.000641			90.7	0.287385	1.02508	0.254932			90.7	1.00068	0.0773076				90.7		0.257919	0.221792				90.7	0.239742	0.296124
			90.8	0.202672	0.239978	0.00017456	0.00026855			90.8	0.230064	0.232761	0.00017944	9.0332e-05			90.8	0.0698794	7.4411			90.8	0.000718	0.000638			90.8	0.290355	0.99062	0.260318			90.8	1.00207	0.0773076				90.8		0.261602	0.226108				90.8	0.237111	0.296124
			90.9	0.204372	0.234842	0.00017578	0.00026978			90.9	0.228729	0.239	0.00017944	8.9111e-05			90.9	0.0689948	7.34691			90.9	0.000719	0.000641			90.9	0.299265	0.995542	0.262113			90.9	1.00486	0.0751566				90.9		0.261602	0.221792				90.9	0.237111	0.292864
			91	0.206072	0.236554	0.00017578	0.00026855			91	0.231398	0.232761	0.00018066	9.0332e-05			91	0.070764	7.5353			91	0.000719	0.000638			91	0.287385	0.995542	0.262113			91	1.00486	0.0740811				91		0.261602	0.224669				91	0.241057	0.297753
			91.1	0.202672	0.234842	0.00017334	0.00026733			91.1	0.234068	0.230682	0.00017944	9.0332e-05			91.1	0.0698794	7.4411			91.1	0.000718	0.00064			91.1	0.287385	1.01031	0.263908			91.1	1.00764	0.0719301				91.1		0.259761	0.221792				91.1	0.238426	0.296124
			91.2	0.204372	0.234842	0.00017456	0.00026855			91.2	0.238071	0.226523	0.00018066	8.9111e-05			91.2	0.070764	7.5353			91.2	0.000719	0.000641			91.2	0.290355	1.04476	0.265703			91.2	1.00486	0.0730056				91.2		0.265285	0.223231				91.2	0.239742	0.296124
			91.3	0.206072	0.234842	0.00017456	0.00027344			91.3	0.235402	0.226523	0.00017944	8.9111e-05			91.3	0.0725331	7.72368			91.3	0.00072	0.000641			91.3	0.290355	1.02015	0.260318			91.3	1.00346	0.0783831				91.3		0.265285	0.224669				91.3	0.237111	0.302642
			91.4	0.204372	0.23313	0.00017456	0.00027222			91.4	0.234068	0.226523	0.00017944	9.0332e-05			91.4	0.0725331	7.72368			91.4	0.000719	0.000642			91.4	0.293325	0.980776	0.258523			91.4	0.997889	0.0805341				91.4		0.267126	0.224669				91.4	0.237111	0.297753
			91.5	0.204372	0.234842	0.00017456	0.00026978			91.5	0.234068	0.226523	0.00018066	8.9111e-05			91.5	0.0725331	7.72368			91.5	0.00072	0.000642			91.5	0.290355	0.985698	0.260318			91.5	1.00207	0.0783831				91.5		0.263444	0.224669				91.5	0.241057	0.297753
			91.6	0.207772	0.234842	0.00017456	0.00026855			91.6	0.236737	0.226523	0.00018066	9.0332e-05			91.6	0.0716486	7.62949			91.6	0.000719	0.000642			91.6	0.302235	0.995542	0.263908			91.6	1.00486	0.0783831				91.6		0.265285	0.221792				91.6	0.239742	0.299383
			91.7	0.207772	0.238266	0.000177	0.000271			91.7	0.231398	0.234841	0.00018188	9.1553e-05			91.7	0.0716486	7.62949			91.7	0.00072	0.000643			91.7	0.296295	1.03492	0.265703			91.7	1.00486	0.0751566				91.7		0.261602	0.224669				91.7	0.241057	0.299383
			91.8	0.211172	0.236554	0.00017578	0.00026855			91.8	0.222057	0.239	0.00018066	8.9111e-05			91.8	0.070764	7.5353			91.8	0.00072	0.000643			91.8	0.296295	1.04969	0.263908			91.8	1.00486	0.0751566				91.8		0.265285	0.223231				91.8	0.237111	0.302642
			91.9	0.211172	0.236554	0.00017456	0.00027222			91.9	0.222057	0.239	0.00018066	8.9111e-05			91.9	0.0725331	7.72368			91.9	0.00072	0.000646			91.9	0.302235	1.04969	0.263908			91.9	1.00764	0.0794586				91.9		0.270809	0.228985				91.9	0.241057	0.299383
			92	0.209472	0.234842	0.00017456	0.000271			92	0.220722	0.232761	0.00018188	9.1553e-05			92	0.0698794	7.4411			92	0.000719	0.000646			92	0.299265	1.05461	0.265703			92	0.999282	0.0773076				92		0.263444	0.226108				92	0.242373	0.299383
			92.1	0.207772	0.238266	0.00017456	0.00026855			92.1	0.228729	0.232761	0.00018311	9.0332e-05			92.1	0.0698794	7.4411			92.1	0.00072	0.000646			92.1	0.293325	1.03	0.267498			92.1	0.996495	0.0794586				92.1		0.268968	0.228985				92.1	0.241057	0.302642
			92.2	0.206072	0.241689	0.00017578	0.000271			92.2	0.22606	0.230682	0.00018188	9.0332e-05			92.2	0.0672257	7.15853			92.2	0.00072	0.000645			92.2	0.299265	1.03984	0.269293			92.2	1.00207	0.0740811				92.2		0.265285	0.226108				92.2	0.242373	0.297753
			92.3	0.200972	0.241689	0.00017578	0.00026978			92.3	0.222057	0.230682	0.00018066	9.0332e-05			92.3	0.0681103	7.25272			92.3	0.00072	0.000646			92.3	0.296295	1.01031	0.269293			92.3	1.00346	0.0762321				92.3		0.267126	0.226108				92.3	0.242373	0.304271
			92.4	0.204372	0.239978	0.00017578	0.00026978			92.4	0.222057	0.230682	0.00018188	9.0332e-05			92.4	0.0689948	7.34691			92.4	0.000721	0.000643			92.4	0.293325	0.985698	0.265703			92.4	1.00486	0.0751566				92.4		0.265285	0.230423				92.4	0.245004	0.304271
			92.5	0.206072	0.238266	0.00017578	0.00026978			92.5	0.223391	0.23692	0.00018311	9.1553e-05			92.5	0.0725331	7.72368			92.5	0.000721	0.000647			92.5	0.302235	1.01031	0.263908			92.5	1.00486	0.0773076				92.5		0.270809	0.226108				92.5	0.243688	0.302642
			92.6	0.207772	0.23313	0.00017578	0.00026733			92.6	0.227395	0.239	0.00018311	9.0332e-05			92.6	0.0716486	7.62949			92.6	0.00072	0.000647			92.6	0.293325	0.995542	0.263908			92.6	1.00068	0.0805341				92.6		0.268968	0.230423				92.6	0.245004	0.305901
			92.7	0.204372	0.234842	0.00017578	0.000271			92.7	0.227395	0.234841	0.00018188	9.0332e-05			92.7	0.0689948	7.34691			92.7	0.00072	0.000647			92.7	0.293325	0.966009	0.263908			92.7	0.996495	0.0794586				92.7		0.272651	0.227546				92.7	0.246319	0.302642
			92.8	0.207772	0.239978	0.00017456	0.000271			92.8	0.224726	0.239	0.00018311	9.0332e-05			92.8	0.0689948	7.34691			92.8	0.000721	0.000648			92.8	0.305205	0.956165	0.260318			92.8	0.995102	0.0773076				92.8		0.267126	0.230423				92.8	0.243688	0.304271
			92.9	0.207772	0.236554	0.00017456	0.000271			92.9	0.224726	0.24108	0.00018311	9.1553e-05			92.9	0.0698794	7.4411			92.9	0.000719	0.000649			92.9	0.296295	0.970932	0.265703			92.9	0.997889	0.0751566				92.9		0.272651	0.226108				92.9	0.246319	0.302642
			93	0.206072	0.238266	0.00017578	0.000271			93	0.224726	0.243159	0.00018311	8.9111e-05			93	0.0725331	7.72368			93	0.000719	0.000648			93	0.293325	0.99062	0.267498			93	0.999282	0.0762321				93		0.265285	0.231862				93	0.241057	0.302642
			93.1	0.204372	0.239978	0.00017578	0.00027222			93.1	0.230064	0.245239	0.00018188	9.0332e-05			93.1	0.0716486	7.62949			93.1	0.000721	0.000651			93.1	0.302235	1.04476	0.269293			93.1	1.00068	0.0740811				93.1		0.268968	0.231862				93.1	0.245004	0.305901
			93.2	0.204372	0.239978	0.00017578	0.00027222			93.2	0.22606	0.245239	0.00018188	9.0332e-05			93.2	0.070764	7.5353			93.2	0.000719	0.000653			93.2	0.293325	1.00046	0.267498			93.2		0.0740811				93.2		0.267126	0.2333				93.2	0.245004	0.305901
			93.3	0.202672	0.241689	0.000177	0.00027344			93.3	0.22606	0.24108	0.00018433	9.1553e-05			93.3	0.0681103	7.25272			93.3	0.00072	0.000654			93.3	0.293325	0.941398	0.272884			93.3		0.0783831				93.3		0.270809	0.231862				93.3	0.246319	0.302642
			93.4	0.206072	0.243401	0.00017578	0.00027344			93.4	0.227395	0.239	0.00018433	9.1553e-05			93.4	0.070764	7.5353			93.4	0.00072	0.000656			93.4	0.305205	0.975854	0.269293			93.4		0.0805341				93.4		0.270809	0.231862				93.4	0.246319	0.30753
			93.5	0.202672	0.243401	0.000177	0.00027344			93.5	0.227395	0.239	0.00018311	9.0332e-05			93.5	0.070764	7.5353			93.5	0.00072	0.000657			93.5	0.302235	0.995542	0.269293			93.5		0.0805341				93.5		0.270809	0.231862				93.5	0.245004	0.305901
			93.6	0.207772	0.248536	0.00017578	0.00026855			93.6	0.227395	0.239	0.00018311	9.0332e-05			93.6	0.0725331	7.72368			93.6	0.00072	0.000657			93.6	0.302235	0.995542	0.271089			93.6		0.0794586				93.6		0.270809	0.228985				93.6	0.250265	0.30753
			93.7	0.209472	0.243401	0.00017578	0.000271			93.7	0.218053	0.243159	0.00018311	9.0332e-05			93.7	0.0716486	7.62949			93.7	0.000721	0.000658			93.7	0.305205	0.970932	0.267498			93.7		0.0773076				93.7		0.274492	0.236177				93.7	0.245004	0.305901
			93.8	0.207772	0.245113	0.00017578	0.00027344			93.8	0.215384	0.243159	0.00018188	9.1553e-05			93.8	0.070764	7.5353			93.8	0.000719	0.000656			93.8	0.302235	1.03984	0.269293			93.8		0.0783831				93.8		0.270809	0.231862				93.8	0.247634	0.30753
			93.9	0.204372	0.243401	0.000177	0.00027588			93.9	0.216719	0.243159	0.00018555	9.0332e-05			93.9	0.070764	7.5353			93.9	0.000719	0.000658			93.9	0.296295	1.07922	0.269293			93.9		0.0773076				93.9		0.276334	0.234739				93.9	0.247634	0.305901
			94	0.202672	0.243401	0.000177	0.00027466			94	0.227395	0.243159	0.00018433	9.1553e-05			94	0.0725331	7.72368			94	0.000721	0.000658			94	0.296295	1.06445	0.269293			94		0.0762321				94		0.276334	0.228985				94	0.246319	0.302642
			94.1	0.206072	0.239978	0.00017456	0.00026978			94.1	0.228729	0.239	0.00018555	9.0332e-05			94.1	0.0743023	7.91207			94.1	0.000721	0.000658			94.1	0.305205	1.05461	0.272884			94.1		0.0794586				94.1		0.276334	0.230423				94.1	0.247634	0.30753
			94.2	0.206072	0.239978	0.00017578	0.00027344			94.2	0.223391	0.24108	0.00018555	9.0332e-05			94.2	0.0743023	7.91207			94.2	0.000723	0.000659			94.2	0.299265	1.0743	0.272884			94.2		0.0816097				94.2		0.272651	0.2333				94.2	0.245004	0.30916
			94.3	0.211172	0.241689	0.000177	0.00027344			94.3	0.22606	0.234841	0.00018555	9.1553e-05			94.3	0.0716486	7.62949			94.3	0.000721	0.00066			94.3	0.293325	1.10875	0.278269			94.3		0.0773076				94.3		0.274492	0.231862				94.3	0.24895	0.30753
			94.4	0.209472	0.241689	0.000177	0.00027222			94.4	0.231398	0.239	0.00018433	9.0332e-05			94.4	0.0716486	7.62949			94.4	0.000723	0.000662			94.4	0.302235	1.0743	0.276474			94.4		0.0773076				94.4		0.274492	0.2333				94.4	0.24895	0.30753
			94.5	0.209472	0.241689	0.00017822	0.00027588			94.5	0.231398	0.24108	0.00018433	9.0332e-05			94.5	0.0725331	7.72368			94.5	0.000723	0.000662			94.5	0.299265	1.03984	0.271089			94.5		0.0783831				94.5		0.276334	0.230423				94.5	0.247634	0.30916
			94.6	0.209472	0.241689	0.00017578	0.00026978			94.6	0.230064	0.24108	0.00018433	9.0332e-05			94.6	0.0743023	7.91207			94.6	0.000725	0.000662			94.6	0.299265	1.08414	0.272884			94.6		0.0794586				94.6		0.272651	0.237616				94.6	0.247634	0.305901
			94.7	0.211172	0.239978	0.000177	0.00026855			94.7	0.227395	0.239	0.00018433	9.0332e-05			94.7	0.0760714	8.10046			94.7	0.000726	0.00066			94.7	0.308176	1.10875	0.272884			94.7		0.0826852				94.7		0.274492	0.2333				94.7	0.246319	0.312419
			94.8	0.209472	0.239978	0.000177	0.00027344			94.8	0.227395	0.24108	0.00018555	9.1553e-05			94.8	0.0743023	7.91207			94.8	0.000724	0.00066			94.8	0.305205	1.05461	0.271089			94.8		0.0837607				94.8		0.276334	0.237616				94.8	0.250265	0.31079
			94.9	0.209472	0.243401	0.000177	0.00027588			94.9	0.230064	0.243159	0.00018433	9.0332e-05			94.9	0.0734177	7.81788			94.9	0.000724	0.000663			94.9	0.299265	1.03492	0.271089			94.9		0.0816097				94.9		0.280017	0.234739				94.9	0.246319	0.312419
			95	0.211172	0.241689	0.00017578	0.00027344			95	0.230064	0.245239	0.00018555	9.0332e-05			95	0.0751868	8.00626			95	0.000725	0.000663			95	0.302235	1.03492	0.271089			95		0.0794586				95		0.280017	0.237616				95	0.252896	0.312419
			95.1	0.209472	0.246825	0.00017578	0.00026978			95.1	0.224726	0.247318	0.00018433	9.1553e-05			95.1	0.076956	8.19465			95.1	0.000724	0.000664			95.1	0.299265	1.01523	0.271089			95.1		0.0816097				95.1		0.280017	0.234739				95.1	0.250265	0.30916
			95.2	0.211172	0.246825	0.000177	0.00027344			95.2	0.22606	0.239	0.00018555	9.1553e-05			95.2	0.076956	8.19465			95.2	0.000724	0.00066			95.2	0.299265	0.99062	0.276474			95.2		0.0805341				95.2		0.280017	0.236177				95.2	0.250265	0.30753
			95.3	0.211172	0.246825	0.00017578	0.00027466			95.3	0.227395	0.232761	0.00018555	9.1553e-05			95.3	0.0787251	8.38304			95.3	0.000724	0.000662			95.3	0.302235	1.01031	0.276474			95.3		0.0826852				95.3		0.281858	0.234739				95.3	0.252896	0.30916
			95.4	0.212872	0.248536	0.000177	0.00027222			95.4	0.228729	0.239	0.00018555	9.1553e-05			95.4	0.0751868	8.00626			95.4	0.000724	0.000664			95.4	0.305205	1.02015	0.281859			95.4		0.0859117				95.4		0.278175	0.236177				95.4	0.24895	0.30916
			95.5	0.211172	0.246825	0.00017578	0.00027222			95.5	0.228729	0.239	0.00018433	9.1553e-05			95.5	0.0734177	7.81788			95.5	0.000725	0.000664			95.5	0.299265	1.01523	0.278269			95.5		0.0859117				95.5		0.278175	0.236177				95.5	0.251581	0.312419
			95.6	0.209472	0.248536	0.00017578	0.000271			95.6	0.228729	0.245239	0.00018555	9.0332e-05			95.6	0.0751868	8.00626			95.6	0.000724	0.000664			95.6	0.296295	1.01031	0.278269			95.6		0.0826852				95.6		0.281858	0.2333				95.6	0.251581	0.30916
			95.7	0.209472	0.246825	0.00017578	0.00027222			95.7	0.231398	0.245239	0.00018433	9.1553e-05			95.7	0.076956	8.19465			95.7	0.000724	0.000664			95.7	0.293325	1.01523	0.274679			95.7		0.0859117				95.7		0.281858	0.237616				95.7	0.251581	0.312419
			95.8	0.209472	0.245113	0.000177	0.00027466			95.8	0.232733	0.249398	0.00018433	9.2773e-05			95.8	0.0796097	8.47723			95.8	0.000724	0.000665			95.8	0.290355	1.00046	0.272884			95.8		0.0859117				95.8		0.281858	0.2333				95.8	0.252896	0.31079
			95.9	0.216272	0.241689	0.000177	0.00027832			95.9	0.234068	0.247318	0.00018555	9.1553e-05			95.9	0.0796097	8.47723			95.9	0.000724	0.000665			95.9	0.293325		0.274679			95.9		0.0848362				95.9		0.281858	0.234739				95.9	0.251581	0.312419
			96	0.216272	0.239978	0.00017578	0.00027466			96	0.230064	0.247318	0.00018555	9.2773e-05			96	0.0778405	8.28884			96	0.000724	0.000667			96	0.296295		0.281859			96		0.0859117				96		0.281858	0.231862				96	0.255527	0.314049
			96.1	0.217972	0.241689	0.00017822	0.00026978			96.1	0.230064	0.249398	0.00018555	9.1553e-05			96.1	0.0760714	8.10046			96.1	0.000723	0.000665			96.1	0.293325		0.278269			96.1		0.0869872				96.1		0.281858	0.234739				96.1	0.250265	0.312419
			96.2	0.216272	0.243401	0.000177	0.00027588			96.2	0.232733	0.245239	0.00018555	9.1553e-05			96.2	0.0787251	8.38304			96.2	0.000724	0.000665			96.2	0.290355		0.278269			96.2		0.0816097				96.2		0.280017	0.2333				96.2	0.252896	0.312419
			96.3	0.219672	0.241689	0.00017578	0.000271			96.3	0.235402	0.243159	0.00018555	9.1553e-05			96.3	0.0796097	8.47723			96.3	0.000724	0.000667			96.3	0.296295		0.278269			96.3		0.0816097				96.3		0.280017	0.237616				96.3	0.252896	0.314049
			96.4	0.219672	0.243401	0.00017822	0.00027588			96.4	0.236737	0.253557	0.00018555	9.0332e-05			96.4	0.0813788	8.66562			96.4	0.000724	0.000668			96.4	0.293325		0.280064			96.4		0.0837607				96.4		0.281858	0.234739				96.4	0.254211	0.30916
			96.5	0.219672	0.245113	0.000177	0.00027588			96.5	0.234068	0.251477	0.00018555	9.1553e-05			96.5	0.0787251	8.38304			96.5	0.000724	0.000669			96.5	0.293325		0.283655			96.5		0.0869872				96.5		0.285541	0.2333				96.5	0.255527	0.315678
			96.6	0.219672	0.243401	0.00017822	0.00027222			96.6	0.232733	0.247318	0.00018433	9.0332e-05			96.6	0.076956	8.19465			96.6	0.000724	0.000668			96.6	0.299265		0.280064			96.6		0.0837607				96.6		0.2837	0.236177				96.6	0.252896	0.314049
			96.7	0.219672	0.245113	0.00017578	0.0002771			96.7	0.232733	0.251477	0.00018433	9.1553e-05			96.7	0.0778405	8.28884			96.7	0.000725	0.000667			96.7	0.305205		0.278269			96.7		0.0859117				96.7		0.2837	0.237616				96.7	0.255527	0.315678
			96.8	0.219672	0.245113	0.00017578	0.000271			96.8	0.24074	0.255636	0.00018311	9.1553e-05			96.8	0.0787251	8.38304			96.8	0.000724	0.00067			96.8	0.299265		0.280064			96.8		0.0859117				96.8		0.287383	0.239054				96.8	0.250265	0.317308
			96.9	0.219672	0.248536	0.00017822	0.00027588			96.9	0.230064	0.261875	0.00018555	9.2773e-05			96.9	0.0804942	8.57142			96.9	0.000724	0.00067			96.9	0.299265		0.281859			96.9		0.0848362				96.9		0.287383	0.237616				96.9	0.254211	0.314049
			97	0.217972	0.253672	0.00017822	0.0002771			97	0.231398	0.255636	0.00018433	9.1553e-05			97	0.0804942	8.57142			97	0.000725	0.000669			97	0.308176		0.271089			97		0.0837607				97		0.287383	0.241931				97	0.254211	0.317308
			97.1	0.217972	0.25196	0.00017822	0.00026978			97.1	0.230064	0.259796	0.00018555	9.0332e-05			97.1	0.0787251	8.38304			97.1	0.000725	0.000669			97.1	0.308176		0.276474			97.1		0.0848362				97.1		0.287383	0.234739				97.1	0.254211	0.318937
			97.2	0.217972	0.248536	0.000177	0.00027344			97.2	0.235402	0.245239	0.00018555	9.0332e-05			97.2	0.0778405	8.28884			97.2	0.000726	0.00067			97.2	0.305205		0.280064			97.2		0.0848362				97.2		0.2837	0.240493				97.2	0.256842	0.315678
			97.3	0.219672	0.246825	0.00017822	0.00027588			97.3	0.235402	0.245239	0.00018433	9.1553e-05			97.3	0.0787251	8.38304			97.3	0.000726	0.00067			97.3	0.314116		0.280064			97.3		0.0848362				97.3		0.285541	0.237616				97.3	0.251581	0.315678
			97.4	0.216272	0.246825	0.00017944	0.00027588			97.4	0.231398	0.245239	0.00018433	9.2773e-05			97.4	0.0822634	8.75981			97.4	0.000726	0.000671			97.4	0.308176		0.280064			97.4		0.0880627				97.4		0.287383	0.244808				97.4	0.251581	0.320567
			97.5	0.217972	0.245113	0.000177	0.0002771			97.5	0.232733	0.245239	0.00018433	9.1553e-05			97.5	0.0804942	8.57142			97.5	0.000725	0.00067			97.5	0.305205		0.280064			97.5		0.0859117				97.5		0.287383	0.237616				97.5	0.255527	0.314049
			97.6	0.216272	0.245113	0.00017578	0.00027344			97.6	0.246078	0.245239	0.00018433	9.1553e-05			97.6	0.076956	8.19465			97.6	0.000724	0.00067			97.6	0.302235		0.276474			97.6		0.0859117				97.6		0.289224	0.241931				97.6	0.256842	0.320567
			97.7	0.214572	0.246825	0.000177	0.00027466			97.7	0.244744	0.243159	0.00018555	9.1553e-05			97.7	0.0760714	8.10046			97.7	0.000724	0.000673			97.7	0.305205		0.283655			97.7		0.0859117				97.7		0.287383	0.239054				97.7	0.256842	0.315678
			97.8	0.217972	0.246825	0.00017822	0.00027466			97.8	0.242075	0.239	0.00019043	9.1553e-05			97.8	0.0787251	8.38304			97.8	0.000724	0.000671			97.8	0.302235		0.28545			97.8		0.0859117				97.8		0.289224	0.240493				97.8	0.255527	0.317308
			97.9	0.217972	0.25196	0.00017822	0.0002771			97.9	0.24074	0.245239	0.00019043	9.1553e-05			97.9	0.0778405	8.28884			97.9	0.000724	0.00067			97.9	0.311146		0.281859			97.9		0.0880627				97.9		0.2837	0.24337				97.9	0.258158	0.322197
			98	0.216272	0.25196	0.00017944	0.00027832			98	0.238071	0.247318	0.00019043	9.1553e-05			98	0.0813788	8.66562			98	0.000724	0.000671			98	0.311146		0.28545			98		0.0912892				98		0.289224	0.24337				98	0.254211	0.318937
			98.1	0.217972	0.25196	0.000177	0.0002771			98.1	0.24074	0.251477	0.00018921	9.1553e-05			98.1	0.0796097	8.47723			98.1	0.000725	0.000673			98.1	0.308176		0.28545			98.1		0.0891382				98.1		0.291065	0.244808				98.1	0.259473	0.322197
			98.2	0.219672	0.255384	0.000177	0.0002771			98.2	0.24074	0.245239	0.00019043	9.3994e-05			98.2	0.0778405	8.28884			98.2	0.000725	0.000673			98.2	0.308176		0.278269			98.2		0.0880627				98.2		0.291065	0.244808				98.2	0.258158	0.322197
			98.3	0.216272	0.253672	0.00017822	0.00027588			98.3	0.238071	0.243159	0.00018921	9.5215e-05			98.3	0.0804942	8.57142			98.3	0.000725	0.000674			98.3	0.314116		0.280064			98.3		0.0891382				98.3		0.287383	0.246247				98.3	0.259473	0.320567
			98.4	0.216272	0.253672	0.00017822	0.00027588			98.4	0.239406	0.24108	0.00018921	9.6436e-05			98.4	0.0804942	8.57142			98.4	0.000726	0.000674			98.4	0.308176		0.283655			98.4		0.0891382				98.4		0.291065	0.240493				98.4	0.256842	0.325456
			98.5	0.217972	0.258807	0.00017822	0.00027588			98.5	0.24074	0.247318	0.00018555	9.7656e-05			98.5	0.0840325	8.94819			98.5	0.000726	0.000674			98.5	0.308176		0.28545			98.5		0.0880627				98.5		0.285541	0.246247				98.5	0.259473	0.320567
			98.6	0.217972	0.260519	0.000177	0.00027466			98.6	0.236737	0.247318	0.00018555	0.00010132			98.6	0.0804942	8.57142			98.6	0.000726	0.000673			98.6	0.317086		0.287245			98.6		0.0891382				98.6		0.292907	0.241931				98.6	0.258158	0.320567
			98.7	0.219672	0.257095	0.000177	0.00027588			98.7	0.238071	0.249398	0.00018677	0.00010376			98.7	0.0787251	8.38304			98.7	0.000726	0.000673			98.7	0.311146		0.290835			98.7		0.0891382				98.7		0.287383	0.24337				98.7	0.256842	0.323826
			98.8	0.219672	0.250248	0.000177	0.00027832			98.8	0.238071	0.255636	0.00018555	0.0001062			98.8	0.0804942	8.57142			98.8	0.000725	0.000673			98.8	0.311146		0.28904			98.8		0.0912892				98.8		0.292907	0.241931				98.8	0.260788	0.320567
			98.9	0.216272	0.250248	0.000177	0.00027588			98.9	0.238071	0.255636	0.00018677	0.00010742			98.9	0.0813788	8.66562			98.9	0.000726	0.000674			98.9	0.314116		0.287245			98.9		0.0912892				98.9		0.289224	0.246247				98.9	0.259473	0.322197
			99	0.216272	0.253672	0.000177	0.0002771			99	0.242075	0.253557	0.00018677	0.00010986			99	0.0840325	8.94819			99	0.000726	0.000674			99	0.314116		0.287245			99		0.0902137				99		0.292907	0.244808				99	0.263419	0.322197
			99.1	0.219672	0.257095	0.00017578	0.0002771			99.1	0.242075	0.257716	0.00018555	0.0001123			99.1	0.0840325	8.94819			99.1	0.000728	0.000674			99.1	0.308176		0.28545			99.1		0.0912892				99.1		0.291065	0.247685				99.1	0.262104	0.322197
			99.2	0.219672	0.262231	0.00017822	0.0002771			99.2	0.239406	0.257716	0.00018555	0.00011475			99.2	0.0804942	8.57142			99.2	0.000726	0.000673			99.2	0.317086		0.281859			99.2		0.0945158				99.2		0.292907	0.250562				99.2	0.260788	0.327085
			99.3	0.221372	0.267366	0.00017822	0.00027954			99.3	0.24074	0.251477	0.00018677	0.00011719			99.3	0.0822634	8.75981			99.3	0.000728	0.000675			99.3	0.317086		0.283655			99.3		0.0912892				99.3		0.292907	0.247685				99.3	0.259473	0.320567
			99.4	0.223072	0.305025	0.00017822	0.00027954			99.4	0.244744	0.253557	0.00018677	0.00011963			99.4	0.0840325	8.94819			99.4	0.000726	0.000674			99.4	0.311146		0.28545			99.4		0.0923647				99.4		0.292907	0.247685				99.4	0.260788	0.322197
			99.5	0.224773	0.311872	0.000177	0.00027954			99.5	0.246078	0.251477	0.00018555	0.00012085			99.5	0.0875708	9.32497			99.5	0.000728	0.000676			99.5	0.314116		0.283655			99.5		0.0934403				99.5		0.294748	0.244808				99.5	0.260788	0.325456
			99.6	0.224773	0.351243	0.000177	0.0002771			99.6	0.244744	0.245239	0.00018555	0.00012451			99.6	0.0893399	9.51335			99.6	0.000726	0.000674			99.6	0.317086		0.28545			99.6		0.0945158				99.6		0.292907	0.244808				99.6	0.260788	0.323826
			99.7	0.228173	0.450526	0.000177	0.00027954			99.7	0.24074	0.253557	0.00018555	0.00012573			99.7	0.0884553	9.41916			99.7	0.000726	0.000674			99.7	0.314116		0.28545			99.7		0.0945158				99.7		0.294748	0.241931				99.7	0.262104	0.327085
			99.8	0.229873	0.594316	0.00017578	0.00027832			99.8	0.246078	0.251477	0.00018555	0.00012939			99.8	0.0866862	9.23077			99.8	0.000726	0.000675			99.8	0.323026		0.29263			99.8		0.0912892				99.8		0.294748	0.246247				99.8	0.259473	0.325456
			99.9	0.228173	0.625128	0.000177	0.00027832			99.9	0.243409	0.259796	0.00018555	0.00013428			99.9	0.0866862	9.23077			99.9	0.000728	0.000675			99.9	0.320056		0.290835			99.9		0.0912892				99.9		0.300273	0.246247				99.9	0.260788	0.323826
			100	0.229873	0.671346	0.000177	0.00027954			100	0.242075	0.257716	0.00018799	0.00013916			100	0.0875708	9.32497			100	0.000725	0.000675			100	0.314116		0.28904			100		0.0923647				100		0.298431	0.247685				100	0.259473	0.327085
			100.1	0.223072	0.726123	0.000177	0.00027954			100.1	0.238071	0.253557	0.00018677	0.0001416			100.1	0.0884553	9.41916			100.1	0.000728	0.000674			100.1	0.314116		0.28545			100.1		0.0912892				100.1		0.300273	0.249124				100.1	0.259473	0.323826
			100.2	0.228173	0.770629	0.000177	0.00027954			100.2	0.243409	0.243159	0.00018677	0.00014404			100.2	0.0893399	9.51335			100.2	0.000728	0.000675			100.2	0.311146		0.283655			100.2		0.0934403				100.2		0.29659	0.247685				100.2	0.262104	0.325456
			100.3	0.224773	0.844235	0.00017822	0.00028076			100.3	0.243409	0.249398	0.00018799	0.00014771			100.3	0.0902245	9.60755			100.3	0.000729	0.000676			100.3	0.311146		0.283655			100.3		0.0955913				100.3		0.300273	0.250562				100.3	0.262104	0.328715
			100.4	0.226473	0.907571	0.000177	0.00028076			100.4	0.244744	0.249398	0.00018677	0.00015015			100.4	0.0875708	9.32497			100.4	0.000729	0.000676			100.4	0.311146		0.281859			100.4		0.0934403				100.4		0.29659	0.249124				100.4	0.264735	0.325456
			100.5	0.224773	0.936671	0.00017822	0.00028076			100.5	0.243409	0.245239	0.00018677	0.00015381			100.5	0.0875708	9.32497			100.5	0.000728	0.000676			100.5	0.320056		0.281859			100.5		0.0955913				100.5		0.298431	0.252001				100.5	0.263419	0.330344
			100.6	0.226473	0.94523	0.000177	0.00027588			100.6	0.243409	0.247318	0.00018799	0.00015625			100.6	0.0884553	9.41916			100.6	0.000728	0.000676			100.6	0.308176		0.290835			100.6		0.0966668				100.6		0.29659	0.250562				100.6	0.263419	0.330344
			100.7	0.221372	0.94523	0.000177	0.00028076			100.7	0.24074	0.251477	0.00018799	0.00015747			100.7	0.091109	9.70174			100.7	0.000729	0.000677			100.7	0.311146		0.28545			100.7		0.0945158				100.7		0.298431	0.252001				100.7	0.264735	0.330344
			100.8	0.223072	0.950365	0.000177	0.00027832			100.8	0.244744	0.253557	0.00018799	0.00016113			100.8	0.091109	9.70174			100.8	0.000729	0.000677			100.8	0.314116		0.28545			100.8		0.0945158				100.8		0.29659	0.247685				100.8	0.264735	0.335233
			100.9	0.224773	0.943518	0.00017822	0.00027954			100.9	0.247413	0.253557	0.00018921	0.00016235			100.9	0.0928782	9.89013			100.9	0.000728	0.000677			100.9	0.305205		0.290835			100.9		0.0955913				100.9		0.298431	0.250562				100.9	0.26605	0.327085
			101	0.224773	0.94523	0.00017822	0.00027954			101	0.239406	0.257716	0.00018921	0.00016235			101	0.0919936	9.79593			101	0.000728	0.000676			101	0.305205		0.290835			101		0.0966668				101		0.294748	0.250562				101	0.263419	0.328715
			101.1	0.223072	0.946942	0.00017822	0.00027832			101.1	0.243409	0.253557	0.00018799	0.00016479			101.1	0.0893399	9.51335			101.1	0.000729	0.000676			101.1	0.317086		0.290835			101.1		0.0966668				101.1		0.298431	0.249124				101.1	0.262104	0.331974
			101.2	0.224773	0.94523	0.00017822	0.00027832			101.2	0.244744	0.253557	0.00018799	0.00016479			101.2	0.0902245	9.60755			101.2	0.000729	0.000679			101.2	0.314116		0.28904			101.2		0.0977423				101.2		0.298431	0.252001				101.2	0.264735	0.325456
			101.3	0.224773	0.943518	0.00017944	0.00028076			101.3	0.247413	0.253557	0.00018921	0.00016724			101.3	0.091109	9.70174			101.3	0.000729	0.000677			101.3	0.308176		0.28904			101.3		0.0977423				101.3		0.300273	0.247685				101.3	0.263419	0.331974
			101.4	0.223072	0.948654	0.00018066	0.00028076			101.4	0.246078	0.257716	0.00019043	0.00016968			101.4	0.0919936	9.79593			101.4	0.000729	0.000677			101.4	0.311146		0.28545			101.4		0.0998933				101.4		0.300273	0.250562				101.4	0.26605	0.328715
			101.5	0.223072	0.943518	0.00018188	0.00027832			101.5	0.243409	0.255636	0.00018921	0.00016968			101.5	0.0928782	9.89013			101.5	0.000729	0.000677			101.5	0.311146		0.28545			101.5		0.0966668				101.5		0.300273	0.252001				101.5	0.263419	0.331974
			101.6	0.226473	0.950365	0.00018188	0.0002771			101.6	0.242075	0.255636	0.00018799	0.00017212			101.6	0.0884553	9.41916			101.6	0.00073	0.000677			101.6	0.308176		0.28545			101.6		0.0955913				101.6		0.29659	0.254878				101.6	0.26605	0.333603
			101.7	0.223072	0.952077	0.00018188	0.00027832			101.7	0.244744	0.257716	0.00019043	0.00017456			101.7	0.0875708	9.32497			101.7	0.000729	0.000679			101.7	0.314116		0.287245			101.7		0.0955913				101.7		0.303956	0.252001				101.7	0.263419	0.328715
			101.8	0.224773	0.955501	0.00018188	0.00027832			101.8	0.250082	0.261875	0.00019043	0.000177			101.8	0.0902245	9.60755			101.8	0.000729	0.000677			101.8	0.320056		0.28904			101.8		0.0955913				101.8		0.300273	0.254878				101.8	0.267366	0.331974
			101.9	0.223072	0.955501	0.00018433	0.00027954			101.9	0.246078	0.261875	0.00019165	0.00017944			101.9	0.0902245	9.60755			101.9	0.000728	0.000677			101.9	0.311146		0.28904			101.9		0.0955913				101.9		0.302114	0.253439				101.9	0.267366	0.330344
			102	0.224773	0.96406	0.00018433	0.00027954			102	0.244744	0.257716	0.00019165	0.00018066			102	0.0919936	9.79593			102	0.00073	0.000677			102	0.308176		0.287245			102		0.0998933				102		0.300273	0.252001				102	0.267366	0.330344
			102.1	0.224773	0.957213	0.00018555	0.00028076			102.1	0.247413	0.257716	0.00019165	0.00018311			102.1	0.0919936	9.79593			102.1	0.00073	0.00068			102.1	0.320056		0.290835			102.1		0.0988178				102.1		0.302114	0.253439				102.1	0.269996	0.338492
			102.2	0.224773	0.955501	0.00018677	0.0002832			102.2	0.248747	0.257716	0.00019287	0.00018433			102.2	0.0928782	9.89013			102.2	0.000729	0.000679			102.2	0.314116		0.28904			102.2		0.0966668				102.2		0.302114	0.254878				102.2	0.26605	0.335233
			102.3	0.224773	0.957213	0.00018799	0.00028198			102.3	0.252751	0.253557	0.00019287	0.00018555			102.3	0.0937627	9.98432			102.3	0.000729	0.000677			102.3	0.314116		0.28904			102.3		0.0945158				102.3		0.305797	0.256316				102.3	0.26605	0.333603
			102.4	0.226473	0.958924	0.00018921	0.0002832			102.4	0.258089	0.257716	0.00019409	0.00018677			102.4	0.0955319	10.1727			102.4	0.000729	0.000677			102.4	0.320056		0.290835			102.4		0.0955913				102.4		0.305797	0.253439				102.4	0.267366	0.338492
			102.5	0.226473	0.957213	0.00018921	0.00028076			102.5	0.259424	0.261875	0.00019409	0.00018921			102.5	0.097301	10.3611			102.5	0.000729	0.000679			102.5	0.317086		0.29263			102.5		0.0966668				102.5		0.305797	0.257755				102.5	0.267366	0.333603
			102.6	0.226473	0.955501	0.00018921	0.0002771			102.6	0.259424	0.257716	0.00019531	0.00019165			102.6	0.0955319	10.1727			102.6	0.000729	0.00068			102.6	0.314116		0.28545			102.6		0.0966668				102.6		0.305797	0.253439				102.6	0.267366	0.335233
			102.7	0.223072	0.960636	0.00018921	0.0002832			102.7	0.263427	0.257716	0.00019531	0.00019409			102.7	0.0919936	9.79593			102.7	0.000728	0.000679			102.7	0.320056		0.287245			102.7		0.0988178				102.7		0.307639	0.256316				102.7	0.264735	0.336863
			102.8	0.224773	0.958924	0.00019043	0.00027954			102.8	0.258089	0.261875	0.00019531	0.00019653			102.8	0.091109	9.70174			102.8	0.000726	0.000679			102.8	0.325996		0.28904			102.8		0.104195				102.8		0.307639	0.257755				102.8	0.269996	0.335233
			102.9	0.226473	0.962348	0.00019165	0.0002832			102.9	0.252751	0.261875	0.00019409	0.00019653			102.9	0.0902245	9.60755			102.9	0.000728	0.000677			102.9	0.317086		0.28904			102.9		0.10312				102.9		0.311321	0.256316				102.9	0.264735	0.340122
			103	0.229873	0.96406	0.00019287	0.00028198			103	0.250082	0.261875	0.00019409	0.00019653			103	0.0928782	9.89013			103	0.00073	0.00068			103	0.320056		0.290835			103		0.100969				103		0.307639	0.256316				103	0.267366	0.336863
			103.1	0.233273	0.96406	0.00019531	0.0002771			103.1	0.250082	0.259796	0.00019409	0.00019775			103.1	0.0946473	10.0785			103.1	0.000728	0.00068			103.1	0.323026		0.28904			103.1		0.0988178				103.1		0.30948	0.254878				103.1	0.269996	0.340122
			103.2	0.226473	0.965771	0.00019653	0.00028076			103.2	0.247413	0.257716	0.00019531	0.00019775			103.2	0.0919936	9.79593			103.2	0.00073	0.00068			103.2	0.317086		0.28545			103.2		0.0988178				103.2		0.307639	0.257755				103.2	0.268681	0.341751
			103.3	0.233273	0.965771	0.00019653	0.00028198			103.3	0.244744	0.259796	0.00019409	0.0002002			103.3	0.0902245	9.60755			103.3	0.000731	0.00068			103.3	0.314116		0.287245			103.3		0.0988178				103.3		0.313163	0.253439				103.3	0.269996	0.340122
			103.4	0.233273	0.96406	0.00019775	0.00028198			103.4	0.248747	0.259796	0.00019409	0.00020264			103.4	0.0884553	9.41916			103.4	0.000729	0.000679			103.4	0.317086		0.28904			103.4		0.0998933				103.4		0.307639	0.257755				103.4	0.269996	0.353158
			103.5	0.233273	0.965771	0.00019897	0.00028076			103.5	0.247413	0.272273	0.00019409	0.00020386			103.5	0.091109	9.70174			103.5	0.00073	0.00068			103.5	0.320056		0.29263			103.5		0.100969				103.5		0.313163	0.257755				103.5	0.271312	0.38249
			103.6	0.234973	0.965771	0.00019897	0.00027954			103.6	0.254086	0.276432	0.00019531	0.00020508			103.6	0.0946473	10.0785			103.6	0.00073	0.000679			103.6	0.320056		0.296221			103.6		0.0998933				103.6		0.30948	0.259193				103.6	0.269996	0.4216
			103.7	0.234973	0.965771	0.0002002	0.00028076			103.7	0.247413	0.263955	0.00019531	0.00020508			103.7	0.097301	10.3611			103.7	0.00073	0.00068			103.7	0.325996		0.296221			103.7		0.0998933				103.7		0.315004	0.259193				103.7	0.271312	0.385749
			103.8	0.233273	0.962348	0.0002002	0.00028076			103.8	0.250082	0.274353	0.00019531	0.0002063			103.8	0.0964164	10.2669			103.8	0.00073	0.00068			103.8	0.323026		0.28904			103.8		0.0966668				103.8		0.30948	0.260631				103.8	0.272627	0.372713
			103.9	0.229873	0.960636	0.00020142	0.00028198			103.9	0.251417	0.263955	0.00019531	0.00020752			103.9	0.0937627	9.98432			103.9	0.000731	0.00068			103.9	0.317086		0.28545			103.9		0.0998933				103.9		0.311321	0.259193				103.9	0.273943	0.431377
			104	0.231573	0.960636	0.00020264	0.00028198			104	0.251417	0.268114	0.00019409	0.00020752			104	0.0937627	9.98432			104	0.00073	0.00068			104	0.323026		0.294426			104		0.10312				104		0.311321	0.260631				104	0.272627	0.579667
			104.1	0.236673	0.962348	0.00020264	0.0002832			104.1	0.250082	0.280591	0.00019531	0.00020752			104.1	0.0937627	9.98432			104.1	0.000729	0.00068			104.1	0.323026		0.29263			104.1		0.10312				104.1		0.313163	0.264947				104.1	0.269996	0.79151
			104.2	0.228173	0.967483	0.00020386	0.0002832			104.2	0.244744	0.266034	0.00019531	0.00020752			104.2	0.0955319	10.1727			104.2	0.000729	0.00068			104.2	0.317086		0.29263			104.2		0.105271				104.2		0.313163	0.260631				104.2	0.272627	0.941429
			104.3	0.231573	0.967483	0.00020508	0.00028198			104.3	0.250082	0.261875	0.00019531	0.00020874			104.3	0.097301	10.3611			104.3	0.00073	0.00068			104.3	0.325996		0.294426			104.3		0.10312				104.3		0.313163	0.260631				104.3	0.273943	0.983798
			104.4	0.229873	0.967483	0.0002063	0.00028198			104.4	0.248747	0.257716	0.00019531	0.00020996			104.4	0.0955319	10.1727			104.4	0.000729	0.00068			104.4	0.323026		0.299811			104.4		0.105271				104.4		0.313163	0.259193				104.4	0.275258	0.993575
			104.5	0.231573	0.972619	0.00020752	0.00028198			104.5	0.251417	0.257716	0.00019531	0.0002124			104.5	0.0946473	10.0785			104.5	0.000729	0.00068			104.5	0.323026		0.299811			104.5		0.10312				104.5		0.313163	0.257755				104.5	0.272627	1.00009
			104.6	0.233273	0.967483	0.00020752				104.6	0.248747	0.263955	0.00019531	0.00021362			104.6	0.0990701	10.5495			104.6	0.00073	0.00068			104.6	0.323026		0.299811			104.6		0.104195				104.6		0.313163	0.259193				104.6	0.273943	1.00987
			104.7	0.233273	0.970907	0.00020752				104.7	0.247413	0.278512	0.00019409	0.00021362			104.7	0.100839	10.7379			104.7	0.000729	0.000681			104.7	0.320056		0.301606			104.7		0.105271				104.7		0.307639	0.259193				104.7	0.273943	1.01965
			104.8	0.233273	0.97433	0.00020874				104.8	0.247413	0.28683	0.00019409	0.00021606			104.8	0.107031	11.3972			104.8	0.000729	0.00068			104.8	0.323026		0.296221			104.8		0.10312				104.8		0.315004	0.26207				104.8	0.272627	1.01802
			104.9	0.231573	0.977754	0.00020874				104.9	0.248747	0.278512	0.00019409	0.00021606			104.9	0.102608	10.9262			104.9	0.000729	0.00068			104.9	0.328966		0.298016			104.9		0.105271				104.9		0.311321	0.259193				104.9	0.275258	1.01639
			105	0.231573	0.977754	0.00020874				105	0.250082	0.266034	0.00019531	0.00021729			105	0.0990701	10.5495			105	0.000729	0.000681			105	0.325996		0.298016			105		0.106346				105		0.313163	0.263508				105	0.273943	1.01476
			105.1	0.234973	0.976042	0.00021118				105.1	0.248747	0.255636	0.00019409	0.00021729			105.1	0.103493	11.0204			105.1	0.000729	0.000681			105.1	0.323026		0.298016			105.1		0.100969				105.1		0.313163	0.259193				105.1	0.277889	1.00824
			105.2	0.233273	0.972619	0.00021118				105.2	0.251417	0.259796	0.00019409	0.00021973			105.2	0.106147	11.303			105.2	0.00073	0.000681			105.2	0.328966		0.301606			105.2		0.0988178				105.2		0.318687	0.263508				105.2	0.275258	1.00824
			105.3	0.233273	0.970907	0.0002124				105.3	0.259424	0.257716	0.00019409	0.00022095			105.3	0.101724	10.8321			105.3	0.000729	0.000681			105.3	0.331936		0.299811			105.3		0.0966668				105.3		0.313163	0.260631				105.3	0.273943	1.00335
			105.4	0.234973	0.969195	0.00021362				105.4	0.258089	0.259796	0.00019531	0.00022095			105.4	0.097301	10.3611			105.4	0.00073	0.000682			105.4	0.328966		0.303401			105.4		0.0998933				105.4		0.315004	0.26207				105.4	0.273943	1.00498
			105.5	0.236673	0.970907	0.00021362				105.5	0.251417	0.263955	0.00019409	0.00022217			105.5	0.0946473	10.0785			105.5	0.00073	0.000681			105.5	0.328966		0.305196			105.5		0.0998933				105.5		0.311321	0.263508				105.5	0.272627	1.00661
			105.6	0.238373	0.969195	0.00021606				105.6	0.258089	0.261875	0.00019409	0.00022217			105.6	0.0946473	10.0785			105.6	0.000729	0.000682			105.6	0.331936		0.306992			105.6		0.10312				105.6		0.316846	0.263508				105.6	0.276573	0.996834
			105.7	0.238373	0.972619	0.00021606				105.7	0.251417	0.263955	0.00019409	0.00022339			105.7	0.0937627	9.98432			105.7	0.000729	0.000682			105.7	0.325996		0.305196			105.7		0.10312				105.7		0.311321	0.263508				105.7	0.273943	0.993575
			105.8	0.236673	0.972619	0.00021851				105.8	0.254086	0.270193	0.00019531	0.00022583			105.8	0.0981856	10.4553			105.8	0.000729	0.000681			105.8	0.331936		0.301606			105.8		0.10312				105.8		0.320529	0.260631				105.8	0.28052	0.993575
			105.9	0.238373	0.977754	0.00021851				105.9	0.256755	0.274353	0.00019409	0.00022461			105.9	0.106147	11.303			105.9	0.00073	0.000681			105.9	0.331936		0.323148			105.9		0.100969				105.9		0.311321	0.264947				105.9	0.277889	0.995205
			106	0.240073	0.976042	0.00021973				106	0.250082	0.272273	0.00019287	0.00022583			106	0.107916	11.4914			106	0.00073	0.000681			106	0.323026		0.384183			106		0.100969				106		0.318687	0.260631				106	0.276573	0.995205
			106.1	0.236673	0.977754	0.00022217				106.1	0.254086	0.270193	0.00019287	0.00022705			106.1	0.104378	11.1146					0.000682			106.1	0.334906		0.452399			106.1		0.10312				106.1		0.316846	0.26207				106.1	0.277889	0.990316
			106.2	0.236673	0.976042	0.00022217				106.2	0.254086	0.270193	0.00019409	0.00022705			106.2	0.105262	11.2088					0.000684			106.2	0.331936		0.660636			106.2		0.108497				106.2		0.318687	0.260631				106.2	0.272627	0.993575
			106.3	0.234973	0.981177	0.00022461				106.3	0.25542	0.266034	0.00019287	0.00022705			106.3	0.106147	11.303					0.000682			106.3	0.325996		0.694744			106.3		0.107422				106.3		0.318687	0.26207				106.3	0.276573	0.998464
			106.4	0.236673	0.981177	0.00022461				106.4	0.25542	0.270193	0.00019409	0.00022705			106.4	0.1088	11.5856					0.000682			106.4	0.334906		0.655251			106.4		0.109573				106.4		0.32237	0.260631				106.4	0.273943	0.998464
			106.5	0.238373	0.979466	0.00022705				106.5	0.256755	0.272273	0.00019287	0.00022705			106.5	0.107916	11.4914					0.000682			106.5	0.331936		0.752189			106.5		0.106346				106.5		0.315004	0.26207				106.5	0.28052	1.00009
			106.6	0.240073	0.977754	0.00022827				106.6	0.254086	0.274353	0.00019409	0.00022949			106.6	0.103493	11.0204					0.000682			106.6	0.334906		0.838357			106.6		0.107422				106.6		0.320529	0.264947				106.6	0.275258	0.991946
			106.7	0.234973	0.97433	0.00022949				106.7	0.256755	0.274353	0.00019409	0.00022949			106.7	0.097301	10.3611					0.000682			106.7	0.337876		0.929909			106.7		0.108497				106.7		0.320529	0.260631				106.7	0.281835	0.995205
			106.8	0.238373	0.972619	0.00022949				106.8	0.256755	0.290989	0.00019409	0.00022827			106.8	0.0990701	10.5495					0.000681			106.8	0.337876		0.965812			106.8		0.109573				106.8		0.326053	0.263508				106.8	0.279204	1.00498
			106.9	0.236673	0.97433	0.00022949				106.9	0.260758	0.295148	0.00019409	0.00022827			106.9	0.0964164	10.2669					0.000681			106.9	0.340846		0.983764			106.9		0.108497				106.9		0.318687	0.260631				106.9	0.279204	1.00335
			107	0.240073	0.979466	0.00023071				107	0.256755	0.280591	0.00019409	0.00022949			107	0.0999547	10.6437					0.000684			107	0.340846		0.983764			107		0.108497				107		0.326053	0.26207				107	0.281835	1.00498
			107.1	0.243473	0.976042	0.00023315				107.1	0.259424	0.278512	0.00019409	0.00023071			107.1	0.0999547	10.6437					0.000682			107.1	0.337876		0.987354			107.1		0.108497				107.1		0.320529	0.26207				107.1	0.277889	1.00498
			107.2	0.241773	0.981177	0.00023315				107.2	0.262093	0.276432	0.00019409	0.00023071			107.2	0.0955319	10.1727					0.000682			107.2	0.334906		0.989149			107.2		0.105271				107.2		0.324212	0.263508				107.2	0.281835	1.00498
			107.3	0.241773	0.979466	0.00023437				107.3	0.262093	0.272273	0.00019409	0.00023193			107.3	0.0964164	10.2669					0.000682			107.3	0.328966		0.990944			107.3		0.10312				107.3		0.326053	0.263508				107.3	0.279204	1.0115
			107.4	0.243473	0.982889	0.00023315				107.4	0.260758	0.268114	0.00019409	0.00023193			107.4	0.0999547	10.6437					0.000682			107.4	0.337876		0.983764			107.4		0.104195				107.4		0.327895	0.26207				107.4	0.28052	1.00824
			107.5	0.243473	0.984601	0.0002356				107.5	0.260758	0.268114	0.00019531	0.00023193			107.5	0.101724	10.8321					0.000682			107.5	0.331936		0.990944			107.5		0.10312				107.5		0.327895	0.26207				107.5	0.28052	1.0115
			107.6	0.243473	0.981177	0.0002356				107.6	0.256755	0.268114	0.00019653	0.00023193			107.6	0.102608	10.9262					0.000681			107.6	0.334906		0.990944			107.6		0.104195				107.6		0.329736	0.260631				107.6	0.28052	1.01476
			107.7	0.243473	0.984601	0.00023682				107.7	0.258089	0.274353	0.00019531	0.00023193			107.7	0.0981856	10.4553					0.000682			107.7	0.337876		0.990944			107.7		0.107422				107.7		0.327895	0.264947				107.7	0.281835	1.00661
			107.8	0.241773	0.991448	0.00023682				107.8	0.25542	0.278512	0.00019531	0.00023315			107.8	0.0981856	10.4553					0.000681			107.8	0.328966		0.990944			107.8		0.107422				107.8		0.329736	0.263508				107.8	0.277889	1.00987
			107.9	0.245173	0.988025	0.00023682				107.9	0.252751	0.278512	0.00019653	0.00023315			107.9	0.0999547	10.6437					0.000684			107.9	0.331936		0.990944			107.9		0.104195				107.9		0.333419	0.267824				107.9	0.283151	1.01313
			108	0.238373	0.988025	0.00023926				108	0.256755	0.278512	0.00019653	0.0002356			108	0.0999547	10.6437					0.000684			108	0.337876		0.99633			108		0.10312				108		0.329736	0.264947				108	0.28052	1.01313
			108.1	0.240073	0.984601	0.00023926				108.1	0.259424	0.274353	0.00019653	0.00023437			108.1	0.100839	10.7379					0.000682			108.1	0.337876		0.994535			108.1		0.106346				108.1		0.33526	0.269262				108.1	0.281835	1.01313
			108.2	0.240073	0.982889	0.00023804				108.2	0.258089	0.270193	0.00019531	0.00023437			108.2	0.0990701	10.5495					0.000684			108.2	0.331936		0.989149			108.2		0.105271				108.2		0.333419	0.263508				108.2	0.28052	1.00824
			108.3	0.243473	0.982889	0.00024048				108.3	0.258089	0.272273	0.00019531	0.0002356			108.3	0.0955319	10.1727					0.000684			108.3	0.337876		0.987354			108.3		0.107422				108.3		0.333419	0.267824				108.3	0.28052	1.00824
			108.4	0.241773	0.982889	0.00024048				108.4	0.259424	0.28683	0.00019409	0.0002356			108.4	0.0928782	9.89013					0.000684			108.4	0.328966		0.989149			108.4		0.109573				108.4		0.331578	0.266385				108.4	0.283151	1.00335
			108.5	0.241773	0.982889	0.0002417				108.5	0.264762	0.276432	0.00019409	0.0002356			108.5	0.0946473	10.0785					0.000684			108.5	0.328966		0.990944			108.5		0.108497				108.5		0.337102	0.266385				108.5	0.28052	1.00498
			108.6	0.240073	0.986313	0.00024048				108.6	0.263427	0.272273	0.00019409	0.0002356			108.6	0.0990701	10.5495					0.000684			108.6	0.340846		0.99274			108.6		0.105271				108.6		0.337102	0.263508				108.6	0.285781	1.00987
			108.7	0.236673	0.986313	0.0002417				108.7	0.266096	0.274353	0.00019409	0.0002356			108.7	0.097301	10.3611					0.000684			108.7	0.334906		0.99633			108.7		0.109573				108.7		0.337102	0.264947				108.7	0.284466	1.00824
			108.8	0.238373	0.986313	0.0002417				108.8	0.264762	0.280591	0.00019409	0.0002356			108.8	0.0937627	9.98432					0.000684			108.8	0.328966		0.99992			108.8		0.106346				108.8		0.337102	0.264947				108.8	0.285781	1.00661
			108.9	0.243473	0.984601	0.00024292				108.9	0.259424	0.278512	0.00019409	0.00023682			108.9	0.0919936	9.79593					0.000685			108.9	0.334906		0.99633			108.9		0.108497				108.9		0.337102	0.26207				108.9	0.283151	1.01313
			109	0.241773	0.984601	0.00024292				109	0.260758	0.270193	0.00019409	0.00023682			109	0.0946473	10.0785					0.000684			109	0.328966		0.998125			109		0.109573				109		0.333419	0.264947				109	0.281835	1.0115
			109.1	0.241773	0.989736	0.00024292				109.1	0.258089	0.272273	0.00019409	0.00023682			109.1	0.097301	10.3611					0.000686			109.1	0.328966		0.99992			109.1		0.111724				109.1		0.338943	0.263508				109.1	0.284466	1.00661
			109.2	0.241773	0.988025	0.00024292				109.2	0.258089	0.274353	0.00019287	0.0002356			109.2	0.0999547	10.6437					0.000685			109.2	0.334906		1.00172			109.2		0.111724				109.2		0.340785	0.264947				109.2	0.285781	1.00987
			109.3	0.241773	0.989736	0.00024536				109.3	0.256755	0.274353	0.00019287	0.00023682			109.3	0.0990701	10.5495					0.000685			109.3	0.331936		1.00172			109.3		0.110648				109.3		0.340785	0.26207				109.3	0.287097	1.00824
			109.4	0.240073	0.988025	0.00024536				109.4	0.260758	0.280591	0.00019287	0.0002356			109.4	0.097301	10.3611					0.000685			109.4	0.334906		0.998125			109.4		0.110648				109.4		0.338943	0.266385				109.4	0.284466	1.00498
			109.5	0.243473	0.984601	0.00024536				109.5	0.260758	0.282671	0.00019165	0.0002356			109.5	0.0964164	10.2669					0.000684			109.5	0.343817		0.99992			109.5		0.109573				109.5		0.337102	0.26207				109.5	0.285781	1.00335
			109.6	0.241773	0.986313	0.00024658				109.6	0.258089	0.28475	0.00019287	0.00023682			109.6	0.0964164	10.2669					0.000686			109.6	0.337876		0.998125			109.6		0.11495				109.6		0.333419	0.266385				109.6	0.285781	1.00172
			109.7	0.243473	0.988025	0.0002478				109.7	0.254086	0.28683	0.00019409	0.00023804			109.7	0.0999547	10.6437					0.000687			109.7	0.334906		0.99992			109.7		0.11495				109.7		0.338943	0.264947				109.7	0.287097	1.00987
			109.8	0.243473	0.982889	0.00024902				109.8	0.256755	0.28683	0.00019287	0.00023804			109.8	0.0999547	10.6437					0.000692			109.8	0.343817		0.99992			109.8		0.11495				109.8		0.337102	0.26207				109.8	0.287097	1.00661
			109.9	0.241773	0.986313	0.00024658				109.9	0.260758	0.278512	0.00019409	0.00023804			109.9	0.0946473	10.0785					0.000693			109.9	0.346787		0.99992			109.9		0.112799				109.9		0.340785	0.264947				109.9	0.287097	1.00498
			110	0.245173	0.984601	0.00024658				110	0.262093	0.270193	0.00019531	0.00023804			110	0.097301	10.3611					0.000693			110	0.343817		1.0071			110		0.113875				110		0.338943	0.260631				110	0.289728	1.00661
			110.1	0.246873	0.986313	0.00024902				110.1	0.260758	0.268114		0.00023926			110.1	0.097301						0.000691			110.1	0.346787		1.00351			110.1		0.110648				110.1		0.340785	0.264947				110.1	0.287097	1.00498
			110.2	0.245173	0.988025	0.00025024				110.2	0.258089	0.272273		0.00023804			110.2	0.101724						0.000687			110.2	0.346787		0.99992			110.2		0.113875				110.2		0.33526	0.26207				110.2	0.289728	1.00824
			110.3	0.243473	0.986313	0.00024902				110.3	0.259424	0.272273		0.00023804			110.3	0.103493						0.000685			110.3	0.334906		1.00531			110.3		0.11495				110.3		0.340785	0.264947				110.3	0.287097	1.00987
			110.4	0.245173	0.989736	0.00024902				110.4	0.262093	0.278512		0.00024048			110.4	0.103493						0.000685			110.4	0.337876		1.00172			110.4		0.113875				110.4		0.338943	0.260631				110.4	0.287097	1.00498
			110.5	0.241773	0.988025	0.00024902				110.5	0.263427	0.280591		0.00023926			110.5	0.102608						0.000687			110.5	0.343817		0.99992			110.5		0.116026				110.5		0.340785	0.26207				110.5	0.289728	1.00335
			110.6	0.241773	0.99316	0.00025024				110.6	0.259424	0.274353		0.00024048			110.6	0.102608						0.000684			110.6	0.340846		1.00172			110.6		0.116026				110.6		0.342626	0.264947				110.6	0.288412	1.00335
			110.7	0.245173	0.99316	0.00025024				110.7	0.260758	0.270193		0.0002417			110.7	0.104378						0.000674			110.7	0.337876		1.00351			110.7		0.110648				110.7		0.340785	0.264947				110.7	0.291043	1.00498
			110.8	0.248573	0.99316	0.00025024				110.8	0.263427	0.274353		0.00024048			110.8	0.106147						0.000669			110.8	0.343817		1.00351			110.8		0.11495				110.8		0.340785	0.266385				110.8	0.285781	1.00987
			110.9	0.248573	0.99316	0.00025024				110.9	0.263427	0.274353		0.0002417			110.9	0.104378						0.000674			110.9	0.337876		1.00351			110.9		0.113875				110.9		0.340785	0.266385				110.9	0.288412	1.00661
			111	0.250273	0.988025	0.00025146				111	0.264762	0.266034		0.00024292			111	0.103493						0.000684			111	0.337876		1.0071			111		0.109573				111		0.344468	0.267824				111	0.287097	1.00661
			111.1	0.251973	0.989736	0.00025146				111.1	0.262093	0.268114		0.0002417			111.1	0.101724						0.000686			111.1	0.343817		1.0071			111.1		0.113875				111.1		0.342626	0.267824				111.1	0.289728	1.00824
			111.2	0.248573	0.991448	0.00025269				111.2	0.263427	0.272273		0.0002417			111.2	0.103493						0.000687			111.2	0.340846		1.00531			111.2		0.113875				111.2		0.346309	0.269262				111.2	0.291043	1.00335
			111.3	0.250273	0.988025	0.00025269				111.3	0.264762	0.266034		0.00024292			111.3	0.102608						0.000687			111.3	0.343817		1.00351			111.3		0.112799				111.3		0.338943	0.264947				111.3	0.287097	1.00661
			111.4	0.251973	0.988025	0.00025391				111.4	0.262093	0.274353		0.00024414			111.4	0.106147						0.000688			111.4	0.346787		1.00351			111.4		0.112799				111.4		0.340785	0.269262				111.4	0.289728	1.00498
			111.5	0.251973	0.99316	0.00025391				111.5	0.260758	0.268114		0.00024536			111.5	0.102608						0.000688			111.5	0.337876		1.00172			111.5		0.111724				111.5		0.340785	0.267824				111.5	0.284466	1.00661
			111.6	0.253674	0.991448	0.00025269				111.6	0.260758	0.268114		0.00024292			111.6	0.103493						0.000686			111.6	0.343817		1.00172			111.6		0.109573				111.6		0.344468	0.269262				111.6	0.289728	1.00824
			111.7	0.250273	0.991448	0.00025269				111.7	0.266096	0.266034		0.0002417			111.7	0.102608						0.000685			111.7	0.346787		1.00351			111.7		0.108497				111.7		0.342626	0.267824				111.7	0.288412	1.00661
			111.8	0.245173	0.99316	0.00025391				111.8	0.263427	0.259796		0.00024292			111.8	0.103493						0.000685			111.8	0.340846		1.00531			111.8		0.110648				111.8		0.348151	0.264947				111.8	0.289728	1.00661
			111.9	0.248573	0.991448	0.00025391				111.9	0.263427	0.259796		0.00024536			111.9	0.105262						0.000686			111.9	0.343817		1.00351			111.9		0.110648				111.9		0.344468	0.269262				111.9	0.294989	0.998464
			112	0.248573	0.994872	0.00025391				112	0.260758	0.268114		0.00024902			112	0.107031						0.000687			112	0.349757		1.0089			112		0.113875				112		0.344468	0.267824				112	0.291043	1.00335
			112.1	0.248573	0.996583	0.00025391				112.1	0.266096	0.266034		0.00024902			112.1	0.105262						0.000686			112.1	0.340846		1.0071			112.1		0.112799				112.1		0.342626	0.270701				112.1	0.293674	1.00987
			112.2	0.248573	1.00001	0.00025391				112.2	0.262093	0.268114		0.00024902			112.2	0.105262						0.000687			112.2	0.346787		1.01069			112.2		0.110648				112.2		0.348151	0.269262				112.2	0.291043	1.00498
			112.3	0.248573	1.00001	0.00025513				112.3	0.262093	0.272273		0.00025024			112.3	0.106147						0.000687			112.3	0.352727		1.0089			112.3		0.110648				112.3		0.346309	0.270701				112.3	0.292358	1.00824
			112.4	0.243473	0.996583	0.00025513				112.4	0.259424	0.272273		0.00025024			112.4	0.107916						0.000688			112.4	0.343817		1.00531			112.4		0.110648				112.4		0.348151	0.273578				112.4	0.296305	1.00824
			112.5	0.246873	1.00001	0.00025513				112.5	0.264762	0.272273		0.00025146			112.5	0.1088						0.000687			112.5	0.346787		1.00172			112.5		0.111724				112.5		0.346309	0.272139				112.5	0.293674	1.00335
			112.6	0.248573	0.994872	0.00025391				112.6	0.2701	0.270193		0.00025146			112.6	0.105262						0.000686			112.6	0.352727		1.00531			112.6		0.109573				112.6		0.346309	0.275016				112.6	0.294989	1.00661
			112.7	0.248573	0.994872	0.00025513				112.7	0.266096	0.266034		0.00025269			112.7	0.105262						0.000687			112.7	0.346787		0.998125			112.7		0.113875				112.7		0.340785	0.272139				112.7	0.293674	1.00335
			112.8	0.248573	0.994872	0.00025635				112.8	0.263427	0.268114		0.00025269			112.8	0.103493						0.000688			112.8	0.346787		1.00172			112.8		0.111724				112.8		0.348151	0.276455				112.8	0.294989	1.00498
			112.9	0.250273	0.996583	0.00025635				112.9	0.266096	0.268114		0.00025391			112.9	0.104378						0.000687			112.9	0.352727		1.00351			112.9		0.111724				112.9		0.344468	0.277893				112.9	0.29762	1.00824
			113	0.245173	0.994872	0.00025513				113	0.2701	0.270193		0.00025391			113	0.107916						0.000687			113	0.352727		1.00531			113		0.110648				113		0.346309	0.277893				113	0.294989	1.00172
			113.1	0.246873	0.994872	0.00025513				113.1	0.272769	0.270193		0.00025269			113.1	0.107916						0.000687			113.1	0.349757		1.0071			113.1		0.108497				113.1		0.346309	0.272139				113.1	0.29762	1.00335
			113.2	0.250273	0.991448	0.00025757				113.2	0.267431	0.280591		0.00025269			113.2	0.106147						0.000688			113.2	0.352727		1.00351			113.2		0.109573				113.2		0.349992	0.276455				113.2	0.296305	1.00172
			113.3	0.251973	0.994872	0.00025635				113.3	0.264762	0.280591		0.00025391			113.3	0.106147						0.000688			113.3	0.346787		1.00172			113.3		0.110648				113.3		0.348151	0.275016				113.3	0.300251	1.00335
			113.4	0.251973	0.998295	0.00025757				113.4	0.266096	0.28683		0.00025269			113.4	0.106147						0.000688			113.4	0.337876		0.998125			113.4		0.116026				113.4		0.349992	0.275016				113.4	0.292358	0.998464
			113.5	0.250273	1.00172	0.00025635				113.5	0.272769	0.282671		0.00025269			113.5	0.107031						0.000688			113.5	0.349757		1.00172			113.5		0.11495				113.5		0.351834	0.276455				113.5	0.29762	1.00009
			113.6	0.250273	1.00172	0.00025635				113.6	0.268766	0.280591		0.00025269			113.6	0.11057						0.000687			113.6	0.346787		1.00531			113.6		0.110648				113.6		0.351834	0.276455				113.6	0.294989	1.00498
			113.7	0.248573	1.00172	0.00025757				113.7	0.266096	0.266034		0.00025391			113.7	0.107916						0.000687			113.7	0.346787		1.00531			113.7		0.108497				113.7		0.349992	0.279332				113.7	0.296305	0.998464
			113.8	0.251973	0.996583	0.00025757				113.8	0.2701	0.266034		0.00025269			113.8	0.106147						0.000688			113.8	0.355697		1.00531			113.8		0.107422				113.8		0.353675	0.275016				113.8	0.298935	1.00009
			113.9	0.253674	0.996583	0.00025757				113.9	0.272769	0.266034		0.00025391			113.9	0.106147						0.000687			113.9	0.355697		1.00172			113.9		0.106346				113.9		0.349992	0.28077				113.9	0.296305	1.00172
			114	0.253674	0.996583	0.00025879				114	0.271435	0.266034		0.00025391			114	0.107031						0.000687			114	0.352727		1.00172			114		0.107422				114		0.353675	0.276455				114	0.296305	0.996834
			114.1	0.253674	0.994872	0.00025879				114.1	0.275438	0.266034		0.00025513			114.1	0.11057						0.000688			114.1	0.358667		0.99992			114.1		0.107422				114.1		0.351834	0.28077				114.1	0.293674	1.00009
			114.2	0.253674	0.996583	0.00025757				114.2	0.2701	0.268114		0.00025513			114.2	0.107916						0.000688			114.2	0.355697		0.99992			114.2		0.107422				114.2		0.349992	0.279332				114.2	0.298935	1.00009
			114.3	0.248573	0.996583	0.00026001				114.3	0.2701	0.270193		0.00025391			114.3	0.106147						0.000688			114.3	0.355697		1.00172			114.3		0.108497				114.3		0.351834	0.279332				114.3	0.296305	0.998464
			114.4	0.251973	0.989736	0.00026001				114.4	0.276773	0.274353		0.00025513			114.4	0.106147						0.000687			114.4	0.358667		1.00351			114.4		0.111724				114.4		0.351834	0.276455				114.4	0.29762	1.00009
			114.5	0.251973	0.99316	0.00026001				114.5	0.274104	0.272273		0.00025391			114.5	0.109685						0.000687			114.5	0.355697		0.99992			114.5		0.109573				114.5		0.349992	0.277893				114.5	0.298935	0.996834
			114.6	0.251973	0.998295	0.00026245				114.6	0.268766	0.270193		0.00025513			114.6	0.1088						0.000687			114.6	0.358667		0.99992			114.6		0.108497				114.6		0.353675	0.282209				114.6	0.296305	1.00009
			114.7	0.253674	0.996583	0.00026245				114.7	0.2701	0.268114		0.00025391			114.7	0.107031						0.000688			114.7	0.355697		1.00351			114.7		0.110648				114.7		0.351834	0.28077				114.7	0.298935	1.00009
			114.8	0.251973	0.994872	0.00026245				114.8	0.275438	0.270193		0.00025391			114.8	0.1088						0.000687			114.8	0.358667		1.00351			114.8		0.113875				114.8		0.353675	0.285086				114.8	0.298935	1.00172
			114.9	0.250273	0.99316	0.00026245				114.9	0.272769	0.266034		0.00025513			114.9	0.107916						0.000688			114.9	0.364607		1.0089			114.9		0.111724				114.9		0.355516	0.282209				114.9	0.302882	1.00009
			115	0.253674	0.998295	0.00026367				115	0.268766	0.268114		0.00025635			115	0.1088						0.000687			115	0.364607		1.0071			115		0.11495				115		0.357358	0.28077				115	0.298935
			115.1	0.253674	0.996583	0.00026367				115.1	0.271435	0.276432		0.00025635			115.1	0.11057						0.000688			115.1	0.358667		1.0071			115.1		0.110648				115.1		0.353675	0.279332				115.1	0.301566
			115.2	0.255374	1.00001	0.00026367				115.2	0.272769	0.278512		0.00025635			115.2	0.107916						0.000687			115.2	0.355697		1.00531			115.2		0.111724				115.2		0.359199	0.282209				115.2	0.301566
			115.3	0.255374	1.00001	0.00026245				115.3	0.274104	0.28475		0.00025391			115.3	0.1088						0.00069			115.3	0.358667		1.0071			115.3		0.116026				115.3		0.357358	0.279332				115.3	0.302882
			115.4	0.258774	1.00001	0.00026367				115.4	0.274104	0.282671		0.00025391			115.4	0.107916						0.000688			115.4	0.361637		1.00531			115.4		0.116026				115.4		0.357358	0.277893				115.4	0.306828
			115.5	0.258774	1.00001	0.00026489				115.5	0.272769	0.270193		0.00025635			115.5	0.109685						0.00069			115.5	0.355697		1.00351			115.5		0.116026				115.5		0.359199	0.282209				115.5	0.301566
			115.6	0.260474	0.99316	0.00026367				115.6	0.275438	0.278512		0.00025513			115.6	0.11057						0.000688			115.6	0.364607		0.99992			115.6		0.117101				115.6		0.357358	0.276455				115.6	0.305513
			115.7	0.257074	0.994872	0.00026489				115.7	0.276773	0.272273		0.00025513			115.7	0.11057						0.000687			115.7	0.367577		1.00531			115.7		0.117101				115.7		0.355516	0.277893				115.7	0.305513
			115.8	0.260474	0.994872	0.00026611				115.8	0.275438	0.278512		0.00025635			115.8	0.109685						0.000688			115.8	0.364607		1.00351			115.8		0.116026				115.8		0.357358	0.279332				115.8	0.301566
			115.9	0.262174	0.998295	0.00026489				115.9	0.2701	0.278512		0.00025635			115.9	0.107031						0.000688			115.9	0.358667		0.998125			115.9		0.117101				115.9		0.357358	0.279332				115.9	0.304197
			116	0.260474	0.994872	0.00026489				116	0.272769	0.280591		0.00025635			116	0.107916						0.00069			116	0.370547		0.99992			116		0.113875				116		0.357358	0.283647				116	0.302882
			116.1	0.255374	0.99316	0.00026611				116.1	0.276773	0.268114		0.00025513			116.1	0.1088						0.000688			116.1	0.367577					116.1		0.112799				116.1		0.362882	0.282209				116.1	0.305513
			116.2	0.262174	0.994872	0.00026489				116.2	0.282111	0.270193		0.00025513			116.2	0.11057						0.00069			116.2	0.364607					116.2		0.110648				116.2		0.373931	0.286524				116.2	0.305513
			116.3	0.258774	0.994872	0.00026611				116.3	0.274104	0.276432		0.00025513			116.3	0.107916						0.000687			116.3	0.367577					116.3		0.112799				116.3		0.41076	0.283647				116.3	0.306828
			116.4	0.257074	0.998295	0.00026611				116.4	0.274104	0.278512		0.00025757			116.4	0.107916						0.000688			116.4	0.367577					116.4		0.113875				116.4		0.41076	0.285086				116.4	0.302882
			116.5	0.258774	1.00172	0.00026489				116.5	0.272769	0.282671		0.00025757			116.5	0.107031						0.000687			116.5	0.361637					116.5		0.113875				116.5		0.46048	0.283647				116.5	0.304197
			116.6	0.255374	1.00343	0.00026489				116.6	0.278107	0.288909		0.00025513			116.6	0.107916						0.000688			116.6	0.364607					116.6		0.111724				116.6		0.515723	0.286524				116.6	0.305513
			116.7	0.251973	1.00514	0.00026489				116.7	0.276773	0.28683		0.00025513			116.7	0.111454						0.00069			116.7	0.364607					116.7		0.113875				116.7		0.56176	0.285086				116.7	0.305513
			116.8	0.255374	1.00343	0.00026611				116.8	0.271435	0.28683		0.00025635			116.8	0.115877						0.00069			116.8	0.358667					116.8		0.111724				116.8		0.640943	0.282209				116.8	0.308143
			116.9	0.255374	1.00343	0.00026733				116.9	0.268766	0.28683		0.00025635			116.9	0.114108						0.00069			116.9	0.367577					116.9		0.112799				116.9		0.729333	0.283647				116.9	0.306828
			117	0.253674	1.00343	0.00026611				117	0.272769	0.28475		0.00025879			117	0.112339						0.00069			117	0.367577					117		0.109573				117		0.806674	0.282209				117	0.306828
			117.1	0.255374	1.00001	0.00026489				117.1	0.271435	0.282671		0.00025757			117.1	0.109685						0.00069			117.1	0.361637					117.1		0.109573				117.1		0.843503	0.283647				117.1	0.305513
			117.2	0.255374	0.998295	0.00026733				117.2	0.268766	0.28683		0.00025635			117.2	0.112339						0.00069			117.2	0.361637					117.2		0.110648				117.2		0.861918	0.282209				117.2	0.309459
			117.3	0.253674	0.998295	0.00026611				117.3	0.268766	0.28475		0.00026001			117.3	0.114108						0.00069			117.3	0.361637					117.3		0.110648				117.3		0.874808	0.28077				117.3	0.309459
			117.4	0.257074	1.00001	0.00026733				117.4	0.275438	0.290989		0.00025879			117.4	0.114992						0.000691			117.4	0.355697					117.4		0.109573				117.4		0.872966	0.28077				117.4	0.31209
			117.5	0.258774	0.996583	0.00026733				117.5	0.279442	0.28683		0.00025879			117.5	0.111454						0.000691			117.5	0.367577					117.5		0.110648				117.5		0.876649	0.282209				117.5	0.31209
			117.6	0.258774	0.998295	0.00026855				117.6	0.276773	0.28683		0.00026001			117.6	0.113223						0.000691			117.6	0.370547					117.6		0.110648				117.6		0.874808	0.285086				117.6	0.306828
			117.7	0.263874	1.00001	0.00026978				117.7	0.268766	0.276432		0.00026001			117.7	0.109685						0.000691			117.7	0.367577					117.7		0.112799				117.7		0.882174	0.283647				117.7	0.309459
			117.8	0.263874	1.00172	0.00026855				117.8	0.274104	0.278512		0.00025879			117.8	0.111454						0.000692			117.8	0.361637					117.8		0.113875				117.8		0.882174	0.286524				117.8	0.305513
			117.9	0.260474	1.00343	0.00026855				117.9	0.276773	0.280591		0.00025879			117.9	0.113223						0.000691			117.9	0.367577					117.9		0.117101				117.9		0.882174	0.28077				117.9	0.309459
			118	0.263874	1.00343	0.00026855				118	0.275438	0.280591		0.00025879			118	0.11057						0.000692			118	0.361637					118		0.116026				118		0.884015	0.283647				118	0.309459
			118.1	0.263874	1.00172	0.00026978				118.1	0.274104	0.28475		0.00026123			118.1	0.109685						0.000693			118.1	0.361637					118.1		0.113875				118.1		0.887698	0.286524				118.1	0.310774
			118.2	0.267274	1.00343	0.00026978				118.2	0.268766	0.288909		0.00026001			118.2	0.111454						0.000692			118.2	0.373517					118.2		0.113875				118.2		0.880332	0.286524				118.2	0.31209
			118.3	0.265574	1.00685	0.00026978				118.3	0.2701	0.293069		0.00026001			118.3	0.113223						0.000692			118.3	0.364607					118.3		0.112799				118.3		0.885857	0.286524				118.3	0.306828
			118.4	0.265574	1.01028	0.00026978				118.4	0.276773	0.288909		0.00025757			118.4	0.114992						0.000692			118.4	0.361637					118.4		0.116026				118.4		0.885857	0.285086				118.4	0.31209
			118.5	0.265574	1.00857	0.00026978				118.5	0.275438	0.282671		0.00025635			118.5	0.113223						0.000692			118.5	0.373517					118.5		0.119252				118.5		0.887698	0.287963				118.5	0.310774
			118.6	0.260474	1.00514	0.00026978				118.6	0.276773	0.278512		0.00026001			118.6	0.111454						0.000692			118.6	0.367577					118.6		0.118177				118.6		0.887698	0.285086				118.6	0.313405
			118.7	0.258774	1.00343	0.000271				118.7	0.278107	0.280591		0.00026001			118.7	0.113223						0.000691			118.7	0.367577					118.7		0.118177				118.7		0.884015	0.289401				118.7	0.313405
			118.8	0.262174	0.998295	0.00026978				118.8	0.286115	0.282671		0.00025879			118.8	0.112339						0.000693			118.8	0.379457					118.8		0.11495				118.8		0.88954	0.287963				118.8	0.31209
			118.9	0.260474	1.00172	0.00026855				118.9	0.282111	0.282671		0.00026001			118.9	0.114992						0.000692			118.9	0.379457					118.9		0.111724				118.9		0.891381	0.289401				118.9	0.313405
			119	0.262174	1.00343	0.000271				119	0.278107	0.293069		0.00026123			119	0.113223						0.000692			119	0.373517					119		0.112799				119		0.896905	0.289401				119	0.31209
			119.1	0.263874	1.00343	0.000271				119.1	0.279442	0.290989		0.00026001			119.1	0.112339						0.000692			119.1	0.376487					119.1		0.111724				119.1		0.896905	0.29084				119.1	0.31472
			119.2	0.262174	1.00001	0.00026978				119.2	0.280776	0.28683		0.00026001			119.2	0.113223						0.000691			119.2	0.385398					119.2		0.112799				119.2		0.895064	0.289401				119.2	0.313405
			119.3	0.267274	0.996583	0.00026978				119.3	0.282111	0.297228		0.00026001			119.3	0.113223						0.000691			119.3	0.382428					119.3		0.113875				119.3		0.895064	0.287963				119.3	0.318667
			119.4	0.265574	0.998295	0.000271				119.4	0.278107	0.299307		0.00026001			119.4	0.112339						0.000693			119.4	0.376487					119.4		0.117101				119.4		0.896905	0.29084				119.4	0.316036
			119.5	0.267274	1.00343	0.000271				119.5	0.278107	0.295148		0.00026001			119.5	0.116761						0.000693			119.5	0.388368					119.5		0.117101				119.5		0.898747	0.292278				119.5	0.313405
			119.6	0.265574	1.00172	0.000271				119.6	0.280776	0.290989		0.00026001			119.6	0.205218						0.000695			119.6	0.385398					119.6		0.11495				119.6		0.898747	0.564153				119.6	0.316036
			119.7	0.263874	1.00514	0.00026978				119.7	0.283445	0.290989		0.00026001			119.7	0.303405						0.000692			119.7	0.370547					119.7		0.113875				119.7		0.900588	0.802942				119.7	0.313405
			119.8	0.262174	1.00172	0.000271				119.8	0.282111	0.28683		0.00026001			119.8	0.318443						0.000692			119.8	0.385398					119.8		0.111724				119.8		0.906113	0.528191				119.8	0.318667
			119.9	0.267274	1.00514	0.00027222				119.9	0.290118	0.290989		0.00026001			119.9	0.49801						0.000693			119.9	0.382428					119.9		0.112799				119.9		0.906113	0.408796				119.9	0.316036
			120	0.265574	1.00685	0.00027222				120	0.288784	0.288909		0.00026123			120	0.629811						0.000693			120	0.379457					120		0.11495				120		0.907954	0.483598				120	0.318667
			120.1	0.265574	1.00857	0.000271				120.1	0.283445	0.28683		0.00026001			120.1	0.675808									120.1	0.385398					120.1		0.111724				120.1		0.90243	0.549768				120.1	0.354183
			120.2	0.265574	1.00514	0.00027222				120.2	0.282111	0.295148		0.00026123			120.2	0.663424									120.2	0.382428					120.2		0.112799				120.2		0.907954	0.584292				120.2	0.439685
			120.3	0.267274	1.00685	0.00027222				120.3	0.279442	0.297228		0.00026001			120.3	0.730651									120.3	0.376487					120.3		0.11495				120.3		0.904271	0.693617				120.3	0.401538
			120.4	0.263874	1.00514	0.00027222				120.4	0.280776	0.293069		0.00026001			120.4	0.884566									120.4	0.373517					120.4		0.11495				120.4		0.909796	0.847536				120.4	0.414692
			120.5	0.250273	1.00343	0.000271				120.5	0.282111	0.293069		0.00026001			120.5	0.92791									120.5	0.379457					120.5		0.112799				120.5		0.907954	0.975561				120.5	0.479147
			120.6	0.277474	1.00514	0.00027222				120.6	0.283445	0.28683		0.00026001			120.6	0.950909									120.6	0.373517					120.6		0.111724				120.6		0.909796	1.01728				120.6	0.527817
			120.7	0.348877	1.00514	0.00027344				120.7	0.279442	0.293069		0.00026123			120.7	0.967715									120.7	0.376487					120.7		0.111724				120.7		0.911637	1.02879				120.7	0.636997
			120.8	0.693989	1.00172	0.00027344				120.8	0.279442	0.293069		0.00026245			120.8	0.976561									120.8	0.382428					120.8		0.109573				120.8		0.917161	1.03166				120.8	0.781692
			120.9	0.887796	1.00343	0.00027344				120.9	0.280776	0.297228		0.00026001			120.9	0.982753									120.9	0.379457					120.9		0.116026				120.9		0.91532	1.03166				120.9	0.869825
			121	0.838494	1.00685	0.00027222				121	0.280776	0.290989		0.00026001			121	0.985407									121	0.373517					121		0.117101				121		0.91532	1.03022				121	0.901395
			121.1	0.644688	1.00685	0.00027344				121.1	0.283445	0.297228		0.00026245			121.1	0.987176									121.1	0.382428					121.1		0.118177				121.1		0.917161	1.02735				121.1	0.914549
			121.2	0.461081	1.00514	0.00027466				121.2	0.288784	0.301387		0.00026245			121.2	0.987176									121.2	0.385398					121.2		0.116026				121.2		0.919003	1.02735				121.2	0.926387
			121.3	0.420279	1.00857	0.00027466				121.3	0.291453	0.297228		0.00026123			121.3	0.992483									121.3	0.379457					121.3		0.113875				121.3		0.91532	1.02447				121.3	0.927703
			121.4	0.535884	1.01028	0.00027344				121.4	0.288784	0.295148		0.00026001			121.4	0.98806									121.4	0.382428					121.4		0.111724				121.4		0.920844	1.02303				121.4	0.932964
			121.5	0.734791	1.00857	0.00027344				121.5	0.287449	0.288909		0.00026001			121.5	0.993368									121.5	0.388368					121.5		0.107422				121.5		0.922686	1.01872				121.5	0.938226
			121.6	0.906497	1.00685	0.00027344				121.6	0.28478	0.276432		0.00026123			121.6	0.995137									121.6	0.382428					121.6		0.107422				121.6		0.922686	1.01296				121.6	0.939542
			121.7	0.962599	1.00514	0.00027466				121.7	0.283445	0.280591		0.00026245			121.7	0.996906									121.7	0.382428					121.7		0.108497				121.7		0.924527	1.00002				121.7	0.944803
			121.8	1.0017	1.00343	0.00027344				121.8	0.288784	0.28475		0.00026123			121.8	0.996906									121.8	0.382428					121.8		0.110648				121.8		0.922686	1.00433				121.8	0.947434
			121.9	1.017	1.00172	0.00027344				121.9	0.28478	0.293069		0.00026123			121.9	0.994252									121.9	0.379457					121.9		0.113875				121.9		0.924527	1.00145				121.9	0.95138
			122	1.0153	1.00343	0.00027466				122	0.279442	0.297228		0.00026123			122	0.994252									122	0.376487					122		0.112799				122		0.922686	1.00433				122	0.952696
			122.1	1.0136	1.00001	0.00027588				122.1	0.280776	0.301387		0.00026123			122.1	0.996022									122.1	0.382428					122.1		0.104195				122.1		0.926369	0.998577				122.1	0.957957
			122.2	1.0102	1.00685	0.00027466				122.2	0.28478	0.299307		0.00026245			122.2	1.00044									122.2	0.385398					122.2		0.0998933				122.2		0.922686	0.991385				122.2	0.964534
			122.3	1.0017	1.00514	0.00027466				122.3	0.282111	0.297228		0.00026245			122.3	0.996906									122.3	0.376487					122.3		0.104195				122.3		0.924527	0.989946				122.3	0.96585
			122.4	0.9983	1.00514	0.00027588				122.4	0.280776	0.299307		0.00026245			122.4	0.995137									122.4	0.388368					122.4		0.107422				122.4		0.924527	0.984192				122.4	0.969796
			122.5	0.9983	1.00685	0.00027466				122.5	0.282111	0.295148		0.00026123			122.5	0.995137									122.5	0.388368					122.5		0.107422				122.5		0.922686	0.988508				122.5	0.971111
			122.6	0.9932	1.01028	0.00027466				122.6	0.276773	0.299307		0.00026245			122.6	0.993368									122.6	0.382428					122.6		0.109573				122.6		0.924527	0.998577				122.6	0.972427
			122.7	0.9915	1.00514	0.00027466				122.7	0.274104	0.301387		0.00026123			122.7	0.996022									122.7	0.382428					122.7		0.108497				122.7		0.926369	0.9957				122.7	0.969796
			122.8	0.9864	1.00172	0.00027588				122.8	0.271435	0.299307		0.00026245			122.8	0.997791									122.8	0.388368					122.8		0.106346				122.8		0.926369	0.991385				122.8	0.971111
			122.9	0.9813	1.00172	0.00027466				122.9	0.274104	0.301387		0.00026123			122.9	0.997791									122.9	0.379457					122.9		0.102044				122.9		0.930052	0.992823				122.9	0.976373
			123	0.983	1.00514	0.0002771				123	0.275438	0.301387		0.00026367			123	0.996022									123	0.385398					123		0.102044				123		0.926369	1.00577				123	0.976373
			123.1	0.977899	1.00172	0.00027588				123.1	0.276773	0.309705		0.00026245			123.1	0.996022									123.1	0.388368					123.1		0.104195				123.1		0.930052	1.00433				123.1	0.977688
			123.2	0.971099	1.00343	0.00027588				123.2	0.276773	0.305546		0.00026245			123.2	0.997791									123.2	0.382428					123.2		0.105271				123.2		0.933735	0.997139				123.2	0.972427
			123.3	0.962599	1.00343	0.00027588				123.3	0.278107	0.299307		0.00026245			123.3	0.995137									123.3	0.382428					123.3		0.107422				123.3		0.937418	0.992823				123.3	0.973742
			123.4	0.965999	1.00343	0.0002771				123.4	0.280776	0.295148		0.00026367			123.4	0.991599									123.4	0.394308					123.4		0.106346				123.4		0.933735	0.992823				123.4	0.976373
			123.5	0.960899	1.00514	0.00027588				123.5	0.2701	0.297228		0.00026367			123.5	0.994252									123.5	0.385398					123.5		0.108497				123.5		0.935576	0.992823				123.5	0.976373
			123.6	0.962599	1.00343	0.00027466				123.6	0.271435	0.299307		0.00026367			123.6	1.0031									123.6	0.385398					123.6		0.108497				123.6		0.933735	0.989946				123.6	0.977688
			123.7	0.962599	1.00343	0.00027588				123.7	0.275438	0.301387		0.00026245			123.7	1.0031									123.7	0.397278					123.7		0.108497				123.7		0.933735	0.992823				123.7	0.977688
			123.8	0.957499	1.00514	0.0002771				123.8	0.275438	0.303466		0.00026245			123.8	1.00133									123.8	0.394308					123.8		0.105271				123.8		0.931893	0.994262				123.8	0.976373
			123.9	0.952399	1.00343	0.0002771				123.9	0.272769	0.305546		0.00026367			123.9	0.998675									123.9	0.391338					123.9		0.107422				123.9		0.939259	0.985631				123.9	0.977688
			124	0.955799	1.00001	0.00027588				124	0.272769	0.309705		0.00026367			124	0.997791									124	0.397278					124		0.106346				124		0.933735	0.975561				124	0.976373
			124.1	0.947298		0.00027466				124.1	0.276773	0.307626		0.00026489			124.1	0.998675									124.1	0.391338					124.1		0.113875				124.1		0.939259	0.987069				124.1	0.979004
			124.2	0.947298		0.0002771				124.2	0.279442	0.309705		0.00026367			124.2	0.99956									124.2	0.388368					124.2		0.223577				124.2		0.933735	0.987069				124.2	0.977688
			124.3	0.947298		0.00027832				124.3	0.280776	0.309705		0.00026367			124.3	1.00398									124.3	0.397278					124.3		0.410716				124.3		0.937418	0.994262				124.3	0.981635
			124.4	0.950698		0.00027832				124.4	0.275438	0.305546		0.00026367			124.4	1.0031									124.4	0.391338					124.4		0.529022				124.4		0.933735	0.987069				124.4	0.977688
			124.5	0.955799		0.0002771				124.5	0.279442	0.307626		0.00026245			124.5	0.996906									124.5	0.388368					124.5		0.672064				124.5		0.935576	0.978438				124.5	0.981635
			124.6	0.954099		0.00027832				124.6	0.280776	0.305546		0.00026367			124.6	1.00133									124.6	0.391338					124.6		0.796823				124.6		0.937418	0.981315				124.6	0.984266
			124.7	0.945598		0.00027954				124.7	0.283445	0.297228		0.00026367			124.7	1.00044									124.7	0.394308					124.7		0.877487				124.7		0.939259	0.969807				124.7	0.981635
			124.8	0.940498		0.00027832				124.8	0.280776	0.305546		0.00026367			124.8	1.00133									124.8	0.385398					124.8		0.918356				124.8		0.939259	0.971246				124.8	0.979004
			124.9	0.943898		0.00027954				124.9	0.278107	0.305546		0.00026367			124.9	1.00398									124.9	0.391338					124.9		0.942017				124.9		0.939259	0.972684				124.9	0.976373
			125	0.947298		0.00027954				125	0.278107	0.307626		0.00026367			125	1.0031									125	0.394308					125		0.94847				125		0.9411	0.972684				125	0.979004
			125.1	0.947298		0.00028076				125.1	0.280776	0.309705		0.00026367			125.1	0.997791									125.1	0.391338					125.1		0.953848				125.1		0.942942	0.975561				125.1	0.976373
			125.2	0.948998		0.00028076				125.2	0.279442	0.305546		0.00026367			125.2	1.0031									125.2	0.400248					125.2		0.95815				125.2		0.942942	0.964053				125.2	0.980319
			125.3	0.943898		0.00027954				125.3	0.279442	0.299307		0.00026489			125.3	1.0031									125.3	0.394308					125.3		0.95815				125.3		0.9411	0.978438				125.3	0.977688
			125.4	0.937098		0.00027954				125.4	0.282111	0.309705		0.00026367			125.4	1.00398									125.4	0.385398					125.4		0.959225				125.4		0.937418	0.977				125.4	0.979004
			125.5	0.943898		0.00027954				125.5	0.287449	0.305546		0.00026489			125.5	1.0031									125.5	0.394308					125.5		0.965678				125.5		0.9411	0.974123				125.5	0.981635
			125.6	0.952399		0.00028076				125.6	0.283445	0.305546		0.00026367			125.6	1.0031									125.6	0.400248					125.6		0.964603				125.6		0.937418	0.964053				125.6	0.979004
			125.7	0.947298		0.00028076				125.7	0.283445	0.307626		0.00026245			125.7	1.00044									125.7	0.397278					125.7		0.962452				125.7		0.942942	0.968369				125.7	0.979004
			125.8	0.950698		0.00027832				125.8	0.28478	0.311785		0.00026367			125.8	1.00487									125.8	0.394308					125.8		0.960301				125.8		0.944783	0.984192				125.8	0.979004
			125.9	0.952399		0.00028076				125.9	0.28478	0.309705		0.00026489			125.9	1.00664									125.9	0.394308					125.9		0.963527				125.9		0.948466	0.984192				125.9	0.984266
			126	0.950698		0.00027954				126	0.28478	0.311785		0.00026489			126	1.0031									126	0.385398					126		0.963527				126		0.944783	0.987069				126	0.986896
			126.1	0.948998		0.00028198				126.1	0.282111	0.311785		0.00026489			126.1	1.0031									126.1	0.394308					126.1		0.965678				126.1		0.948466	0.977				126.1	0.988212
			126.2	0.945598		0.00028076				126.2	0.282111	0.309705		0.00026489			126.2	1.00044									126.2	0.403218					126.2		0.96998				126.2		0.944783	0.979877				126.2	0.988212
			126.3	0.942198		0.00028076				126.3	0.288784	0.307626		0.00026367			126.3	0.99956									126.3	0.397278					126.3		0.971056				126.3		0.946625	0.992823				126.3	0.986896
			126.4	0.950698		0.00028076				126.4	0.290118	0.305546		0.00026367			126.4	1.00133									126.4	0.394308					126.4		0.974282				126.4		0.948466	0.989946				126.4	0.989527
			126.5	0.955799		0.00028198				126.5	0.291453	0.303466		0.00026489			126.5	1.00575									126.5	0.400248					126.5		0.975358				126.5		0.946625	0.991385				126.5	0.990843
			126.6	0.942198		0.00028076				126.6	0.292787	0.305546		0.00026489			126.6	1.0031									126.6	0.394308					126.6		0.976433				126.6		0.944783	0.987069				126.6	0.990843
			126.7	0.943898		0.00028198				126.7	0.295456	0.305546		0.00026489			126.7	1.00133									126.7	0.394308					126.7		0.975358				126.7		0.946625	0.984192				126.7	0.990843
			126.8	0.945598		0.00028198				126.8	0.292787	0.311785		0.00026611			126.8	1.00133									126.8	0.406188					126.8		0.980735				126.8		0.946625	0.987069				126.8	0.990843
			126.9	0.945598		0.00028076				126.9	0.286115	0.311785		0.00026611			126.9	0.99956									126.9	0.403218					126.9		0.981811				126.9		0.950308	0.982754				126.9	0.992158
			127	0.943898		0.00028198				127	0.379532	0.311785		0.00026611			127	1.00044									127	0.397278					127		0.983962				127		0.952149	0.989946				127	0.988212
			127.1	0.942198		0.00028076				127.1	0.647775	0.309705		0.00026489			127.1	0.998675									127.1	0.403218					127.1		0.982886				127.1		0.953991	0.994262				127.1	0.994789
			127.2	0.942198		0.00028076				127.2	0.618415	0.305546		0.00026489			127.2	0.997791									127.2	0.403218					127.2		0.988264				127.2		0.952149	0.989946				127.2	0.992158
			127.3	0.943898		0.0002832				127.3	0.551688	0.307626		0.00026611			127.3	0.998675									127.3	0.394308					127.3		0.985038				127.3		0.953991	0.982754				127.3	0.996104
			127.4	0.948998		0.00028198				127.4	0.585051	0.309705		0.00026611			127.4	1.00044									127.4	0.406188					127.4		0.985038				127.4		0.948466	0.975561				127.4	0.990843
			127.5	0.948998		0.00028076				127.5	0.599731	0.326342		0.00026611			127.5	1.00133									127.5	0.403218					127.5		0.983962				127.5		0.948466	0.984192				127.5	0.989527
			127.6	0.945598		0.00028076				127.6	0.673131	0.311785		0.00026733			127.6	0.997791									127.6	0.400248					127.6		0.985038				127.6		0.946625	0.988508				127.6	0.990843
			127.7	0.943898		0.00028198				127.7	0.799912	0.322182		0.00026611			127.7	1.00044									127.7	0.409158					127.7		0.986113				127.7		0.950308	0.991385				127.7	0.989527
			127.8	0.942198		0.00028198				127.8	0.917352	0.33258		0.00026611			127.8	1.00044									127.8	0.409158					127.8		0.98934				127.8		0.948466	0.987069				127.8	0.993473
			127.9	0.942198		0.00028442				127.9	0.960057	0.349217		0.00026611			127.9	1.0031									127.9	0.403218					127.9		0.988264				127.9		0.952149	0.978438				127.9	0.989527
			128	0.948998		0.0002832				128	0.980075	0.509343		0.00026611			128	1.00487									128	0.409158					128		0.987189				128		0.946625	0.984192				128	0.992158
			128.1	0.952399		0.0002832				128.1	0.984079	0.704822		0.00026611			128.1	1.00133									128.1	0.412128					128.1		0.986113				128.1		0.955832	0.982754				128.1	0.986896
			128.2	0.959199		0.00028442				128.2	0.989417	0.788004		0.00026489			128.2	0.996906									128.2	0.403218					128.2		0.987189				128.2		0.955832	0.991385				128.2	0.990843
			128.3	0.962599		0.00028442				128.3	0.994755	0.85455		0.00026611			128.3	1.00664									128.3	0.406188					128.3		0.987189				128.3		0.957674	0.985631				128.3	0.988212
			128.4	0.959199		0.00028442				128.4	1.00143	0.896142		0.00026611			128.4	1.00044									128.4	0.409158					128.4		0.98934				128.4		0.952149	0.988508				128.4	0.988212
			128.5	0.957499		0.0002832				128.5	1.00143	0.921096		0.00026611			128.5	1.0031									128.5	0.403218					128.5		0.990415				128.5		0.955832	0.989946				128.5	0.992158
			128.6	0.960899		0.0002832				128.6	0.997424	0.954369		0.00026489			128.6	1.00044									128.6	0.400248					128.6		0.993642				128.6		0.950308	0.985631				128.6	0.990843
			128.7	0.959199		0.00028442				128.7	0.997424	0.987642		0.00026611			128.7	0.994252									128.7	0.415098					128.7		0.992566				128.7		0.957674	0.988508				128.7	0.988212
			128.8	0.960899		0.0002832				128.8	0.997424	1.0022		0.00026611			128.8	0.992483									128.8	0.406188					128.8		0.987189				128.8		0.953991	0.989946				128.8	0.989527
			128.9	0.959199		0.00028442				128.9	1.00143	1.00428		0.00026611			128.9	0.997791									128.9	0.403218					128.9		0.983962				128.9		0.959515	0.991385				128.9	0.988212
			129	0.957499		0.00028442				129	0.998759	0.995961		0.00026611			129	0.99956									129	0.415098					129		0.986113				129		0.963198	0.992823				129	0.994789
			129.1	0.954099		0.00028442				129.1	1.00143	0.99804		0.00026611			129.1	1.0031									129.1	0.409158					129.1		0.992566				129.1		0.963198	0.991385				129.1	0.992158
			129.2	0.957499		0.0002832				129.2	1.00009	0.99804		0.00026611			129.2	0.996906									129.2	0.403218					129.2		1.00117				129.2		0.957674	1.00002				129.2	0.99742
			129.3	0.955799		0.0002832				129.3	1.00143	1.0022		0.00026611			129.3	0.994252									129.3	0.415098					129.3		1.00977				129.3		0.957674	0.998577				129.3	0.992158
			129.4	0.955799		0.00028564				129.4	1.00009	1.00636		0.00026489			129.4	0.994252									129.4	0.418069					129.4		1.00332				129.4		0.955832	0.994262				129.4	0.993473
			129.5	0.962599		0.00028564				129.5	1.00276	1.0022		0.00026611			129.5	0.996906									129.5	0.412128					129.5		0.997944				129.5		0.965039	0.992823				129.5	0.992158
			129.6	0.962599		0.00028442				129.6	1.00276	1.00636		0.00026611			129.6	0.997791									129.6	0.412128					129.6		0.995793				129.6		0.963198	0.994262				129.6	0.993473
			129.7	0.957499		0.0002832				129.7	1.00543	1.0126		0.00026611			129.7	0.996022									129.7	0.412128					129.7		0.994717				129.7		0.961356	0.992823				129.7	0.990843
			129.8	0.962599		0.00028442				129.8	1.00276	1.0126		0.00026855			129.8	0.994252									129.8	0.409158					129.8		0.994717				129.8		0.959515	0.992823				129.8	0.988212
			129.9	0.959199		0.00028442				129.9	1.00143	1.00844		0.00026611			129.9	0.99956									129.9	0.409158					129.9		0.996868				129.9		0.963198	1.00002				129.9	0.988212
			130	0.957499		0.00028442				130	1.00276	1.00636		0.00026611			130	0.996022									130	0.418069					130		1.00117				130		0.961356	0.998577				130	0.989527
			130.1	0.954099		0.00028442				130.1	1.0041	1.0022		0.00026611			130.1	0.996906									130.1	0.415098					130.1		0.999019				130.1		0.963198	0.997139				130.1	0.994789
			130.2	0.960899		0.00028442				130.2	1.00677	1.00636		0.00026611			130.2	0.997791									130.2	0.406188					130.2		0.994717				130.2		0.966881	0.991385				130.2	0.993473
			130.3	0.955799		0.00028442				130.3	1.0041	1.00012		0.00026733			130.3	0.994252									130.3	0.415098					130.3		0.997944				130.3		0.970564	0.9957				130.3	0.993473
			130.4	0.962599		0.00028442				130.4	1.00543	1.0022		0.00026733			130.4	0.993368									130.4	0.406188					130.4		0.999019				130.4		0.966881	1.00145				130.4	0.99742
			130.5	0.964299		0.00028442				130.5	1.00543	1.00636		0.00026611			130.5	0.99956									130.5	0.409158					130.5		1.00009				130.5		0.965039	0.9957				130.5	0.99742
			130.6	0.962599		0.00028564				130.6	1.0081	1.00636		0.00026611			130.6	1.00487									130.6	0.418069					130.6		1.00332				130.6		0.963198	1.00289				130.6	1.00137
			130.7	0.971099		0.00028442				130.7	1.00543	1.00844		0.00026611			130.7	1.00575									130.7	0.415098					130.7		1.00547				130.7		0.968722	1.00002				130.7	0.993473
			130.8	0.969399		0.00028564				130.8	1.0041	1.00636		0.00026611			130.8	1.00221									130.8	0.412128					130.8		1.00547				130.8		0.965039	1.00289				130.8	0.993473
			130.9	0.967699		0.00028564				130.9	1.0081	1.00844		0.00026855			130.9	0.996906									130.9	0.421039					130.9		1.0044				130.9		0.968722	1.00145				130.9	0.99742
			131	0.962599		0.00028687				131	1.0081	1.0022		0.00026733			131	1.00044									131	0.412128					131		1.0044				131		0.961356	1.00577				131	0.99742
			131.1	0.964299		0.00028564				131.1	1.0041	1.00012		0.00026733													131.1	0.409158					131.1		1.0044				131.1		0.970564	1.00433				131.1	1.00268
			131.2	0.964299		0.00028564				131.2	1.00543	1.00636		0.00026733													131.2	0.415098					131.2		1.00547				131.2		0.968722	1.00433				131.2	0.994789
			131.3	0.957499		0.00028564				131.3	1.0041	1.0022		0.00026733													131.3	0.418069					131.3		1.00762				131.3		0.976088	1.00289				131.3	1.00005
			131.4	0.952399		0.00028564				131.4	1.01077	1.00636		0.00026733													131.4	0.412128					131.4		1.00655				131.4		0.972405	0.997139				131.4	0.99742
			131.5	0.954099		0.00028564				131.5	1.0081	1.00844		0.00026733													131.5	0.412128					131.5		1.00332				131.5		0.976088	0.9957				131.5	1.00005
			131.6	0.954099		0.00028687				131.6	1.00276	1.01676		0.00026733													131.6	0.415098					131.6		1.00332				131.6		0.972405	0.994262				131.6	1.00005
			131.7	0.959199		0.00028564				131.7	1.00543	1.00844		0.00026733													131.7	0.415098					131.7		1.0087				131.7		0.97793	1.00289				131.7	0.998735
			131.8	0.959199		0.00028687				131.8	1.00677	1.00636		0.00026855													131.8	0.412128					131.8		1.00547				131.8		0.976088	1.00145				131.8	1.00005
			131.9	0.959199		0.00028687				131.9	1.00543	1.00428		0.00026855													131.9	0.424009					131.9		1.00547				131.9		0.97793	1.00577				131.9	1.00005
			132	0.957499		0.00028687				132	1.00543	1.00012		0.00026733													132	0.45668					132		1.00977				132		0.974247	1.00433				132	1.00005
			132.1	0.960899		0.00028809				132.1	1.00677	1.0022		0.00026611													132.1	0.747747					132.1		1.0087				132.1		0.97793	1.00289
			132.2	0.959199		0.00028809				132.2	1.00543	1.00636		0.00026611													132.2	0.807149					132.2		1.00762				132.2		0.974247	1.00433
			132.3	0.960899		0.00028809				132.3	1.0081	1.0022		0.00026733													132.3	0.82794					132.3		1.00762				132.3		0.97793	1.00289
			132.4	0.965999		0.00028809				132.4	1.00276	1.00428		0.00026733													132.4	0.82497					132.4		1.00655				132.4		0.976088	1.00577
			132.5	0.967699		0.00028931				132.5	1.0041	1.0022		0.00026733													132.5	0.902192					132.5		1.00655				132.5		0.981613	1.01009
			132.6	0.969399		0.00028809				132.6	1.00543	1.00428		0.00026978													132.6	0.988324					132.6		1.00655				132.6		0.97793	1.00865
			132.7	0.964299		0.00028687				132.7	1.00677	1.00428		0.00026733													132.7	0.997234					132.7		1.0087				132.7		0.987137	1.00865
			132.8	0.964299		0.00028809				132.8	1.00543	1.00636		0.00026855													132.8	1.0002					132.8		1.00547				132.8		0.985295	0.997139
			132.9	0.964299		0.00028809				132.9	1.00543	1.00012		0.00026855													132.9	1.00317					132.9		1.00762				132.9		0.979771	0.998577
			133	0.964299		0.00028809				133	1.00543	1.00012		0.00026733													133	1.0002					133		1.00762				133		0.976088	0.998577
			133.1	0.962599		0.00028931				133.1	1.00543	1.00012		0.00026855													133.1	1.0002					133.1		1.00762				133.1		0.976088	1.00433
			133.2	0.962599		0.00028931				133.2	1.0081	1.0022		0.00026855													133.2	1.00614					133.2		1.00762				133.2		0.97793	1.00577
			133.3	0.960899		0.00029053				133.3	1.00543	1.00636		0.00026855													133.3	1.00614					133.3		1.01085				133.3		0.981613	1.00577
			133.4	0.954099		0.00028931				133.4	1.0041	1.00844		0.00026855													133.4	1.00317					133.4		1.0087				133.4		0.981613	1.01009
			133.5	0.954099		0.00029053				133.5	1.00677	1.00844		0.00026855													133.5	1.00911					133.5		1.00655				133.5		0.97793	1.01009
			133.6	0.955799		0.00029053				133.6	1.00543	1.00844		0.00026855													133.6	1.01208					133.6		1.00547				133.6		0.979771	1.01009
			133.7	0.957499		0.00029053				133.7	0.99342	1.01052		0.00026733													133.7	1.00911					133.7		1.00762				133.7		0.985295	1.00721
			133.8	0.952399		0.00028931				133.8	1.00009	1.00844		0.00026733													133.8	1.01208					133.8		1.00762				133.8		0.981613	1.00721
			133.9	0.957499		0.00028931				133.9	1.0041	1.00012		0.00026855													133.9	1.01505					133.9		1.01085				133.9		0.983454	1.00577
			134	0.959199		0.00028931				134	1.00543	1.0022		0.00026978													134	1.00911					134		1.013				134		0.983454	1.00433
			134.1	0.962599		0.00029053				134.1	1.00543	0.995961		0.00026855													134.1	1.00317					134.1		1.0087				134.1		0.985295	1.00865
			134.2	0.965999		0.00028931				134.2	1.00143	1.00428		0.00026855													134.2	1.00614					134.2		1.00547				134.2		0.981613	1.00577
			134.3	0.964299		0.00029053				134.3	1.00143	0.995961		0.00026855													134.3	0.997234					134.3		1.00655				134.3		0.987137	1.00577
			134.4	0.965999		0.00029053				134.4	1.0081	1.00636		0.00026855													134.4	1.00317					134.4		1.0087				134.4		0.983454	1.00865
			134.5	0.965999		0.00029053				134.5	1.0041	1.0022		0.00026855													134.5	1.00911					134.5		1.013				134.5		0.987137	1.00721
			134.6	0.965999		0.00029053				134.6	1.0041	0.993881		0.00026855													134.6	1.0002					134.6		1.01408				134.6		0.988978	1.00721
			134.7	0.967699		0.00029053				134.7	1.00543	0.991802		0.00026733													134.7	1.00317					134.7		1.01515				134.7		0.985295	1.00289
			134.8	0.969399		0.00029053				134.8	1.00677	0.993881		0.00026855													134.8	1.0002					134.8		1.01515				134.8		0.981613	1.00865
			134.9	0.965999		0.00028931				134.9	1.00143	1.00636		0.00026978													134.9	1.00911					134.9		1.013				134.9		0.987137	1.01009
			135	0.969399		0.00029175				135	1.00143	1.00012		0.00026855													135	1.00317					135		1.01515				135		0.983454	1.01584
			135.1	0.967699		0.00029053				135.1	1.00143	1.0022		0.00026733													135.1	1.00317					135.1		1.01408				135.1		0.987137	1.02015
			135.2	0.962599		0.00029053				135.2	1.00276	1.00636		0.00026733													135.2	1.01208					135.2		1.01408				135.2		0.987137	1.01728
			135.3	0.964299		0.00029053				135.3	1.00543	1.00844		0.00026855													135.3	1.0002					135.3		1.01193				135.3		0.987137	1.01009
			135.4	0.964299		0.00029053				135.4	1.00143	1.00844		0.00026978													135.4	0.991294					135.4		1.01408				135.4		0.981613	1.00577
			135.5	0.964299		0.00029053				135.5	1.00276	1.01052		0.00026978													135.5	1.01208					135.5		1.01515				135.5		0.987137	1.00721
			135.6	0.962599		0.00029175				135.6	1.00543	1.0022		0.00026855													135.6	1.00911					135.6		1.01515				135.6		0.988978	1.00721
			135.7	0.962599		0.00029053				135.7	1.00543	0.995961		0.00026855													135.7	1.00317					135.7		1.00762				135.7		0.998186	1.01009
			135.8	0.960899		0.00029053				135.8	1.00143	0.99804		0.00026978													135.8	1.01208					135.8		1.00225				135.8		0.99082	1.0144
			135.9	0.960899		0.00029053				135.9	1.00143	0.993881		0.00026978													135.9	1.01208					135.9		1.00009				135.9		0.992661	1.00865
			136	0.964299		0.00029297				136	1.00276	0.99804		0.00026978													136	1.00317					136		1.00009				136		0.985295	1.01152
			136.1	0.964299		0.00029175				136.1	1.00276	0.99804		0.00026855													136.1	1.00911					136.1						136.1		0.994503	1.00865
			136.2	0.964299		0.00029053				136.2	1.0041	1.00844		0.00026978													136.2	1.01208					136.2						136.2		0.998186	1.00865
			136.3	0.964299		0.00029175				136.3	1.00677	1.00428		0.000271													136.3	1.00614					136.3						136.3		1.00003	1.01009
			136.4	0.960899		0.00029175				136.4	1.00543	1.00428		0.000271													136.4	1.01208					136.4						136.4		0.992661	1.01009
			136.5	0.960899		0.00029175				136.5	1.00677	0.995961		0.00026978													136.5	1.01505					136.5						136.5		0.994503	1.0144
			136.6	0.964299		0.00029175				136.6	1.00276	0.99804		0.00026978													136.6	1.01208					136.6						136.6		0.988978	1.00865
			136.7	0.965999		0.00029419				136.7	0.998759	1.0022		0.00026978													136.7	1.00317					136.7						136.7		0.992661	1.01009
			136.8	0.967699		0.00029175				136.8	0.997424	1.0022		0.00026978													136.8	1.01505					136.8						136.8		0.992661	1.00865
			136.9	0.967699		0.00029297				136.9	1.00276	1.0022		0.00026978													136.9	1.00317					136.9						136.9		0.992661	1.00865
			137	0.972799		0.00029419				137	1.00677	0.99804		0.00026855													137	1.00317					137						137		0.992661	1.01152
			137.1	0.971099		0.00029297				137.1	1.0041	1.00012		0.00026855													137.1	1.01208					137.1						137.1		1.00003	1.00865
			137.2	0.974499		0.00029175				137.2	1.00276	1.00844		0.00027222													137.2	1.00317					137.2						137.2		0.998186	1.0144
			137.3	0.972799		0.00029297				137.3	1.0041	1.00636		0.00026978													137.3	0.997234					137.3						137.3		0.996344	1.0144
			137.4	0.967699		0.00029297				137.4	1.00276	1.00428		0.000271													137.4	1.00614					137.4						137.4		0.992661	1.01728
			137.5	0.969399		0.00029297				137.5	1.00276	1.0022		0.000271													137.5	1.00911					137.5						137.5		0.998186	1.01584
			137.6	0.971099		0.00029297				137.6	1.00143	0.995961		0.000271													137.6	1.0002					137.6						137.6		0.998186	1.0144
			137.7	0.969399		0.00029297				137.7	1.00543	1.0022		0.00026978													137.7	1.00317					137.7						137.7		1.00371	1.01584
			137.8	0.971099		0.00029175				137.8	1.0041	1.00012		0.00026978													137.8	1.01505					137.8						137.8		0.998186	1.01296
			137.9	0.972799		0.00029297				137.9	1.0041			0.00026855													137.9	1.00614					137.9						137.9		0.996344	1.01296
			138	0.969399		0.00029419				138	0.998759			0.00026978													138	1.0002					138						138		0.985295	1.01152
			138.1	0.971099		0.00029419				138.1	1.0041			0.00026978													138.1	1.00911					138.1						138.1		0.994503	1.01009
			138.2	0.971099		0.00029541				138.2	1.0081			0.000271													138.2	1.00614					138.2						138.2		0.99082	1.01296
			138.3	0.971099		0.00029419				138.3	1.00943			0.00026978													138.3	1.01208					138.3						138.3		0.994503	1.0144
			138.4	0.976199		0.00029297				138.4	1.00543			0.000271													138.4	1.00317					138.4						138.4		0.994503	1.01872
			138.5	0.971099		0.00029541				138.5	1.00543			0.00026978													138.5	1.01505					138.5						138.5		0.99082	1.0144
			138.6	0.972799		0.00029419				138.6	1.0041			0.00026978													138.6	1.00317					138.6						138.6		0.994503	1.01584
			138.7	0.971099		0.00029419				138.7	1.00943			0.000271													138.7	1.0002					138.7						138.7		0.996344	1.0144
			138.8	0.972799		0.00029419				138.8	1.00543			0.000271													138.8	1.01505					138.8						138.8		0.994503	1.01152
			138.9	0.971099		0.00029297				138.9	1.0041			0.000271													138.9	1.01208					138.9						138.9		0.996344	1.01584
			139	0.974499		0.00029297				139	1.0041			0.000271													139	1.00911					139						139		1.00003	1.01152
			139.1	0.976199		0.00029419				139.1	1.0081			0.000271													139.1	1.01208					139.1						139.1		1.00003	1.01584
			139.2	0.974499		0.00029419				139.2	1.00276			0.000271													139.2	1.00614					139.2						139.2		0.996344	1.01728
			139.3	0.971099		0.00029297				139.3	1.0041			0.000271													139.3	1.0002					139.3						139.3		1.00187	1.01584
			139.4	0.972799		0.00029419				139.4	1.0041			0.00027222													139.4	1.00614					139.4						139.4		1.00187	1.01584
			139.5	0.969399		0.00029419				139.5	1.0081			0.000271													139.5	1.01505					139.5						139.5		1.00371	1.01152
			139.6	0.969399		0.00029297				139.6	1.00276			0.000271													139.6	1.00614					139.6						139.6		1.00555	1.0144
			139.7	0.972799		0.00029419				139.7	0.998759			0.000271													139.7	1.00317					139.7						139.7		1.00187	1.0144
			139.8	0.972799		0.00029297				139.8	0.994755			0.00027222													139.8	1.00614					139.8						139.8		1.00003	1.02159
			139.9	0.971099		0.00029419				139.9	0.997424			0.000271													139.9	1.01505					139.9						139.9		1.00371	1.01872
			140	0.964299		0.00029541				140	1.00009			0.000271													140	1.00614					140						140		1.00003	1.01728
			140.1	0.967699		0.00029541				140.1	1.00009			0.000271													140.1	1.01208					140.1						140.1			1.01872
			140.2	0.967699		0.00029419				140.2	1.0041			0.000271													140.2	1.00911					140.2						140.2			1.01296
			140.3	0.974499		0.00029419				140.3	1.0041			0.000271													140.3	1.00317					140.3						140.3			1.01584
			140.4	0.974499		0.00029663				140.4	0.997424			0.000271													140.4	1.00317					140.4						140.4			1.01296
			140.5	0.976199		0.00029541				140.5	1.00276			0.00026978													140.5	1.00911					140.5						140.5			1.01728
			140.6	0.974499		0.00029419				140.6	1.0041			0.000271													140.6	1.00317					140.6						140.6			1.01728
			140.7	0.972799		0.00029419				140.7	1.00677			0.000271													140.7	1.00614					140.7						140.7			1.01584
			140.8	0.972799		0.00029541				140.8	1.0041			0.000271													140.8	1.00911					140.8						140.8			1.01584
			140.9	0.977899		0.00029541				140.9	1.00276			0.000271													140.9	1.00911					140.9						140.9			1.01584
			141	0.972799		0.00029541				141	1.0041			0.000271													141	1.0002					141						141			1.02015
			141.1	0.976199		0.00029419				141.1	1.00677			0.00027222													141.1						141.1						141.1			1.01296
			141.2	0.977899		0.00029541				141.2	1.00543			0.00027222													141.2						141.2						141.2			1.01872
			141.3	0.979599		0.00029541				141.3	1.00143			0.00027222													141.3						141.3						141.3			1.01872
			141.4	0.977899		0.00029541				141.4	1.00543			0.00027222													141.4						141.4						141.4			1.01584
			141.5	0.974499		0.00029419				141.5	1.00677			0.00027222													141.5						141.5						141.5			1.0144
			141.6	0.976199		0.00029541				141.6	1.0081			0.00027344													141.6						141.6						141.6			1.01584
			141.7	0.977899		0.00029541				141.7	1.0041			0.00027344													141.7						141.7						141.7			1.02303
			141.8	0.979599		0.00029541				141.8	1.0081			0.00027222													141.8						141.8						141.8			1.02015
			141.9	0.9813		0.00029663				141.9	1.0081			0.000271													141.9						141.9						141.9			1.01728
			142	0.977899		0.00029541				142	1.0081			0.00027222													142						142						142			1.0144
			142.1	0.977899		0.00029663				142.1	1.00276			0.00027222													142.1						142.1						142.1			1.01152
			142.2	0.977899		0.00029785				142.2	1.0121			0.00027466													142.2						142.2						142.2			1.02015
			142.3	0.977899		0.00029785				142.3	1.0081			0.00027222													142.3						142.3						142.3			1.01728
			142.4	0.976199		0.00029785				142.4	1.0041			0.00027222													142.4						142.4						142.4			1.02303
			142.5	0.976199		0.00029663				142.5	1.00009			0.000271													142.5						142.5						142.5			1.01728
			142.6	0.974499		0.00029785				142.6	1.00009			0.000271													142.6						142.6						142.6			1.01728
			142.7	0.972799		0.00029663				142.7	1.00143			0.000271													142.7						142.7						142.7			1.01296
			142.8	0.976199		0.00029663				142.8	1.00009			0.00027222													142.8						142.8						142.8			1.01152
			142.9	0.972799		0.00029663				142.9	0.998759			0.00027466													142.9						142.9						142.9			1.0144
			143	0.972799		0.00029785				143	0.998759			0.00027222													143						143						143			1.01296
			143.1	0.977899		0.00029785				143.1	0.996089			0.00027222													143.1						143.1						143.1			1.01584
			143.2	0.976199		0.00029785				143.2	0.998759			0.00027222													143.2						143.2						143.2			1.0144
			143.3	0.974499		0.00029785				143.3	1.00276			0.00027344													143.3						143.3						143.3			1.01296
			143.4	0.974499		0.00029785				143.4	1.00009			0.00027344													143.4						143.4						143.4			1.01728
			143.5	0.976199		0.00029907				143.5	0.996089			0.00027222													143.5						143.5						143.5			1.01584
			143.6	0.977899		0.00029785				143.6	0.996089			0.00027344													143.6						143.6						143.6			1.01872
			143.7	0.976199		0.00029785				143.7	1.00276			0.00027222													143.7						143.7						143.7			1.01296
			143.8	0.977899		0.00029785				143.8	0.996089			0.00027344													143.8						143.8						143.8			1.0144
			143.9	0.974499		0.00029663				143.9	0.997424																143.9						143.9						143.9			1.01009
			144	0.976199		0.00029785				144	1.00143																144						144						144			1.01296
			144.1	0.979599		0.00029785				144.1	1.00543																144.1						144.1						144.1			1.0144
			144.2	0.983		0.00029785				144.2	1.0041																144.2						144.2						144.2			1.01152
			144.3	0.9813		0.00029785				144.3	1.00543																144.3						144.3						144.3			1.01728
			144.4	0.983		0.00029907				144.4	1.0041																144.4						144.4						144.4			1.01296
			144.5	0.9847		0.00029785				144.5	1.01077																144.5						144.5						144.5			1.01584
			144.6	0.9847		0.00029663				144.6	1.00543																144.6						144.6						144.6			1.01152
			144.7	0.9864		0.00029663				144.7	1.00009																144.7						144.7						144.7			1.01584
			144.8	0.9847		0.00029785				144.8	0.998759																144.8						144.8						144.8			1.01584
			144.9	0.983		0.00029907				144.9	1.00143																144.9						144.9						144.9			1.0144
			145	0.9847		0.00030029				145	1.0041																145						145						145			1.01296
			145.1	0.977899		0.00029907				145.1	1.0041																145.1						145.1						145.1			1.00865
			145.2	0.9813		0.00030029				145.2	1.00143																145.2						145.2						145.2			1.01152
			145.3	0.979599		0.00030029				145.3	0.997424																145.3						145.3						145.3			1.01152
			145.4	0.9813		0.00029907				145.4	0.998759																145.4						145.4						145.4			1.01296
			145.5	0.977899		0.00029785				145.5	1.00677																145.5						145.5						145.5			1.00865
			145.6	0.979599		0.00030029				145.6	1.00009																145.6						145.6						145.6			1.01009
			145.7	0.972799		0.00029907				145.7	0.997424																145.7						145.7						145.7			1.01009
			145.8	0.974499		0.00029907				145.8	1.00009																145.8						145.8						145.8			1.01009
			145.9	0.977899		0.00030029				145.9	1.00009																145.9						145.9						145.9			1.01296
			146	0.979599		0.00029907				146	0.996089																146						146						146			1.00865
			146.1	0.976199		0.00030029				146.1	0.997424																146.1						146.1						146.1			1.01152
			146.2	0.976199		0.00030029				146.2	0.998759																146.2						146.2						146.2			1.01009
			146.3	0.977899		0.00030151				146.3	1.0041																146.3						146.3						146.3			1.0144
			146.4	0.977899		0.00029785				146.4	1.00143																146.4						146.4						146.4			1.01009
			146.5	0.983		0.00029907				146.5	0.996089																146.5						146.5						146.5			1.01152
			146.6	0.983		0.00030029				146.6	0.996089																146.6						146.6						146.6			1.01152
			146.7	0.9847		0.00030029				146.7	0.998759																146.7						146.7						146.7			1.01152
			146.8	0.983		0.00030029				146.8	0.998759																146.8						146.8						146.8			1.01009
			146.9	0.9847		0.00030151				146.9	0.996089																146.9						146.9						146.9			1.00865
			147	0.9813		0.00030029				147	0.994755																147						147						147			1.0144
			147.1	0.983		0.00030029				147.1	0.997424																147.1						147.1						147.1			1.01009
			147.2	0.977899		0.00029907				147.2	0.997424																147.2						147.2						147.2			1.0144
			147.3	0.977899		0.00030029				147.3	0.99342																147.3						147.3						147.3			1.01009
			147.4	0.974499		0.00029907				147.4	0.99342																147.4						147.4						147.4			1.01009
			147.5	0.972799		0.00030151				147.5	0.996089																147.5						147.5						147.5			1.01152
			147.6	0.971099		0.00029907				147.6	0.998759																147.6						147.6						147.6			1.01152
			147.7	0.976199		0.00030029				147.7	0.996089																147.7						147.7						147.7			1.01584
			147.8	0.976199		0.00030029				147.8	0.994755																147.8						147.8						147.8			1.01009
			147.9	0.976199		0.00030151				147.9	0.997424																147.9						147.9						147.9			1.01009
			148	0.974499		0.00030151				148	1.00009																148						148						148			1.00865
			148.1	0.974499		0.00030151																					148.1						148.1						148.1			1.00865
			148.2	0.974499		0.00030151																					148.2						148.2						148.2			1.00865
			148.3	0.974499		0.00029907																					148.3						148.3						148.3			1.01152
			148.4	0.976199		0.00030151																					148.4						148.4						148.4			1.00865
			148.5	0.979599		0.00030273																					148.5						148.5						148.5			1.00145
			148.6	0.974499		0.00030029																					148.6						148.6						148.6			1.00577
			148.7	0.9813		0.00030151																					148.7						148.7						148.7			1.00433
			148.8	0.976199		0.00030273																					148.8						148.8						148.8			1.00721
			148.9	0.9813		0.00029907																					148.9						148.9						148.9			1.00721
			149	0.983		0.00030151																					149						149						149			1.00721
			149.1	0.983		0.00030151																					149.1						149.1						149.1			1.00721
			149.2	0.9813		0.00030273																					149.2						149.2						149.2			1.00577
			149.3	0.979599		0.00030151																					149.3						149.3						149.3			1.00865
			149.4	0.9813		0.00030151																					149.4						149.4						149.4			1.00433
			149.5	0.9813		0.00030151																					149.5						149.5						149.5			1.00433
			149.6	0.983		0.00030151																					149.6						149.6						149.6			1.00289
			149.7	0.9847		0.00030151																					149.7						149.7						149.7			1.00577
			149.8	0.983		0.00030151																					149.8						149.8						149.8			1.00289
			149.9	0.979599		0.00030151																					149.9						149.9						149.9			1.00002
			150	0.983		0.00030273																					150						150						150			1.00433
			150.1	0.983																							150.1						150.1						150.1			1.00145
			150.2	0.983																							150.2						150.2						150.2			1.00721
			150.3	0.9813																							150.3						150.3						150.3			1.00433
			150.4	0.9813																							150.4						150.4						150.4			1.00577
			150.5	0.983																							150.5						150.5						150.5			1.00577
			150.6	0.9864																							150.6						150.6						150.6			1.00289
			150.7	0.9864																							150.7						150.7						150.7			1.00145
			150.8	0.9864																							150.8						150.8						150.8			1.00289
			150.9	0.9847																							150.9						150.9						150.9			1.01009
			151	0.983																							151						151						151			1.01872
			151.1	0.9847																							151.1						151.1						151.1			1.01728
			151.2	0.983																							151.2						151.2						151.2			1.00721
			151.3	0.976199																							151.3						151.3						151.3			0.998577
			151.4	0.9813																							151.4						151.4						151.4			1.00433
			151.5	0.9847																							151.5						151.5						151.5			1.00577
			151.6	0.983																							151.6						151.6						151.6			1.01152
			151.7	0.983																							151.7						151.7						151.7			1.01009
			151.8	0.9813																							151.8						151.8						151.8			1.00721
			151.9	0.979599																							151.9						151.9						151.9			1.00577
			152	0.979599																							152						152						152			1.00145
			152.1	0.983																							152.1						152.1						152.1			1.00721
			152.2	0.9813																							152.2						152.2						152.2			1.00145
			152.3	0.983																							152.3						152.3						152.3			1.00577
			152.4	0.983																							152.4						152.4						152.4			1.00433
			152.5	0.9813																							152.5						152.5						152.5			1.00289
			152.6	0.9864																							152.6						152.6						152.6			1.00721
			152.7	0.9881																							152.7						152.7						152.7			1.00433
			152.8	0.983																							152.8						152.8						152.8			1.00433
			152.9	0.979599																							152.9						152.9						152.9			0.997139
			153	0.977899																							153						153						153			1.00289
			153.1	0.977899																							153.1						153.1						153.1			1.00289
			153.2	0.977899																							153.2						153.2						153.2			1.00145
			153.3	0.979599																							153.3						153.3						153.3			1.00721
			153.4	0.977899																							153.4						153.4						153.4			1.00433
			153.5	0.979599																							153.5						153.5						153.5			1.00865
			153.6	0.9813																							153.6						153.6						153.6			1.00433
			153.7	0.983																							153.7						153.7						153.7			1.00433
			153.8	0.983																							153.8						153.8						153.8			0.997139
			153.9	0.9813																							153.9						153.9						153.9			1.00145
			154	0.983																							154						154						154			1.00577
			154.1	0.9881																							154.1						154.1						154.1			1.00289
			154.2	0.9881																							154.2						154.2						154.2			1.00577
			154.3	0.9847																							154.3						154.3						154.3			1.00002
			154.4	0.983																							154.4						154.4						154.4			1.00145
			154.5	0.9881																							154.5						154.5						154.5			0.998577
			154.6	0.9881																							154.6						154.6						154.6			1.00145
			154.7	0.9847																							154.7						154.7						154.7			1.00145
			154.8	0.983																							154.8						154.8						154.8			1.00433
			154.9	0.9864																							154.9						154.9						154.9			1.00721
			155	0.9864																							155						155						155			1.00002
			155.1	0.9898																							155.1						155.1						155.1			1.00577
			155.2	0.9864																							155.2						155.2						155.2			1.00145
			155.3	0.9864																							155.3						155.3						155.3			1.00289
			155.4	0.9864																							155.4						155.4						155.4			1.00289
			155.5	0.9864																							155.5						155.5						155.5			1.00289
			155.6	0.979599																							155.6						155.6						155.6			1.00145
			155.7	0.983																							155.7						155.7						155.7			0.9957
			155.8	0.9847																							155.8						155.8						155.8			1.00145
			155.9	0.9881																							155.9						155.9						155.9			0.998577
			156	0.9847																							156						156						156			1.00433
			156.1	0.983																							156.1						156.1						156.1			1.00289
			156.2	0.979599																							156.2						156.2						156.2			1.00002
			156.3	0.983																							156.3						156.3						156.3			0.998577
			156.4	0.983																							156.4						156.4						156.4			0.992823
			156.5	0.9847																							156.5						156.5						156.5			0.997139
			156.6	0.9847																							156.6						156.6						156.6			0.994262
			156.7	0.983																							156.7						156.7						156.7			0.997139
			156.8	0.9847																							156.8						156.8						156.8			0.9957
			156.9	0.9847																							156.9						156.9						156.9			0.992823
			157	0.9864																							157						157						157			0.997139
			157.1	0.9949																							157.1						157.1						157.1			0.991385
			157.2	0.983																							157.2						157.2						157.2			0.9957
			157.3	0.9881																							157.3						157.3						157.3			0.997139
			157.4	0.9881																							157.4						157.4						157.4			1.00145
			157.5	0.9847																							157.5						157.5						157.5			1.00002
			157.6	0.9898																							157.6						157.6						157.6			0.997139
			157.7	0.9847																							157.7						157.7						157.7			0.997139
			157.8	0.9847																							157.8						157.8						157.8			0.992823
			157.9	0.9847																							157.9						157.9						157.9			0.998577
			158	0.983																							158						158						158			0.9957
			158.1	0.9813																							158.1						158.1						158.1			0.994262
			158.2	0.9813																							158.2						158.2						158.2			0.9957
			158.3	0.977899																							158.3						158.3						158.3			0.994262
			158.4	0.979599																							158.4						158.4						158.4			0.997139
			158.5	0.979599																							158.5						158.5						158.5			0.994262
			158.6	0.983																							158.6						158.6						158.6			0.992823
			158.7	0.979599																							158.7						158.7						158.7			0.991385
			158.8	0.9864																							158.8						158.8						158.8			0.991385
			158.9	0.9881																							158.9						158.9						158.9			0.9957
			159	0.9864																							159						159						159			0.994262
			159.1	0.9864																							159.1						159.1						159.1			0.998577
			159.2	0.9898																							159.2						159.2						159.2			0.994262
			159.3	0.9864																							159.3						159.3						159.3			0.992823
			159.4	0.9915																							159.4						159.4						159.4			0.994262
			159.5	0.9898																							159.5						159.5						159.5			0.989946
			159.6	0.983																							159.6						159.6						159.6			0.998577
			159.7	0.983																							159.7						159.7						159.7			0.9957
			159.8	0.9847																							159.8						159.8						159.8			0.997139
			159.9	0.9847																							159.9						159.9						159.9			0.9957
			160	0.983																							160						160						160			0.991385
			160.1	0.979599																							160.1						160.1						160.1			0.997139
			160.2	0.977899																							160.2						160.2						160.2			0.9957
			160.3	0.979599																							160.3						160.3						160.3			1.00002
			160.4	0.9813																							160.4						160.4						160.4			0.994262
			160.5	0.983																							160.5						160.5						160.5			0.991385
			160.6	0.983																							160.6						160.6						160.6			0.9957
			160.7	0.9864																							160.7						160.7						160.7			0.994262
			160.8	0.983																							160.8						160.8						160.8			0.997139
			160.9	0.983																							160.9						160.9						160.9			0.994262
			161	0.9864																							161						161						161			0.9957
			161.1	0.9813																							161.1												161.1			0.997139
			161.2	0.979599																							161.2												161.2			0.9957
			161.3	0.983																							161.3												161.3			1.00002
			161.4	0.9847																							161.4												161.4			0.997139
			161.5	0.9813																							161.5												161.5			0.998577
			161.6	0.983																							161.6												161.6			0.998577
			161.7	0.9847																							161.7												161.7			0.997139
			161.8	0.9813																							161.8												161.8			0.9957
			161.9	0.9881																							161.9												161.9			0.9957
			162	0.9898																							162												162			0.997139
			162.1	0.9881																							162.1												162.1			0.994262
			162.2	0.9881																							162.2												162.2			0.9957
			162.3	0.9881																							162.3												162.3			0.991385
			162.4	0.9847																							162.4												162.4			0.991385
			162.5	0.9881																							162.5												162.5			0.997139
			162.6	0.9847																							162.6												162.6			0.997139
			162.7	0.9847																							162.7												162.7			1.00289
			162.8	0.983																							162.8												162.8			0.997139
			162.9	0.9813																							162.9												162.9			0.997139
			163	0.979599																							163												163			0.994262
			163.1	0.979599																							163.1												163.1			0.9957
			163.2	0.983																							163.2												163.2			0.994262
			163.3	0.979599																							163.3												163.3			0.9957
			163.4	0.983																							163.4												163.4			0.997139
			163.5	0.983																							163.5												163.5			0.992823
			163.6	0.983																							163.6												163.6			0.994262
			163.7	0.9847																							163.7												163.7			0.989946
			163.8	0.9864																							163.8												163.8			0.994262
			163.9	0.9864																							163.9												163.9			0.998577
			164	0.9864																							164												164			1.00002
			164.1	0.9864																							164.1												164.1			1.00289
			164.2	0.9864																							164.2												164.2			0.9957
			164.3	0.983																							164.3												164.3			1.00002
			164.4	0.979599																							164.4												164.4
			164.5	0.9847																							164.5												164.5
			164.6	0.9864																							164.6												164.6
			164.7	0.9881																							164.7												164.7
			164.8	0.9847																							164.8												164.8
			164.9	0.9847																							164.9												164.9
			165	0.9915																							165												165
			165.1	0.9898																							165.1												165.1
			165.2	0.9898																							165.2												165.2
			165.3	0.9898																							165.3												165.3
			165.4	0.9864																							165.4												165.4
			165.5	0.9847																							165.5												165.5
			165.6	0.983																							165.6												165.6
			165.7	0.9813																							165.7												165.7
			165.8	0.983																							165.8												165.8
			165.9	0.983																							165.9												165.9
			166	0.983																							166												166
			166.1	0.979599																							166.1												166.1
			166.2	0.983																							166.2												166.2
			166.3	0.9864																							166.3												166.3
			166.4	0.9864																							166.4												166.4
			166.5	0.9847																							166.5												166.5
			166.6	0.9847																							166.6												166.6
			166.7	0.9813																							166.7												166.7
			166.8	0.9881																							166.8												166.8
			166.9	0.9915																							166.9												166.9
			167	0.9915																							167												167
			167.1	0.9915																							167.1												167.1
			167.2	0.9932																							167.2												167.2
			167.3	0.9898																							167.3												167.3
			167.4	0.9898																							167.4												167.4
			167.5	0.9915																							167.5												167.5
			167.6	0.9864																							167.6												167.6
			167.7	0.9915																							167.7												167.7
			167.8	0.9915																							167.8												167.8
			167.9	0.9881																							167.9												167.9
			168	0.9932																							168												168
			168.1	0.9898																							168.1												168.1
			168.2	0.9881																							168.2												168.2
			168.3	0.9915																							168.3												168.3
			168.4	0.9881																							168.4												168.4
			168.5	0.9864																							168.5												168.5
			168.6	0.9915																							168.6												168.6
			168.7	0.9932																							168.7												168.7
			168.8	0.9932																							168.8												168.8
			168.9	0.9898																							168.9												168.9
			169	0.9932																							169												169
			169.1	0.9898																							169.1												169.1
			169.2	0.9864																							169.2												169.2
			169.3	0.9864																							169.3												169.3
			169.4	0.9881																							169.4												169.4
			169.5	0.9881																							169.5												169.5
			169.6	0.9881																							169.6												169.6
			169.7	0.9881																							169.7												169.7
			169.8	0.9881																							169.8												169.8
			169.9	0.9881																							169.9												169.9
			170	0.9881																							170												170
			170.1	0.9898																							170.1												170.1
			170.2	0.9881																							170.2												170.2
			170.3	0.9898																							170.3												170.3
			170.4	0.9898																							170.4												170.4
			170.5	0.9932																							170.5												170.5
			170.6	0.9932																							170.6												170.6
			170.7	0.9966																							170.7												170.7
			170.8	0.9949																							170.8												170.8
			170.9	0.9966																							170.9												170.9
			171	0.9932																							171												171
			171.1	0.9932																							171.1												171.1
			171.2	0.9898																							171.2												171.2
			171.3	0.9915																							171.3												171.3
			171.4	0.9898																							171.4												171.4
			171.5	0.9898																							171.5												171.5
			171.6	0.9864																							171.6												171.6
			171.7	0.9898																							171.7												171.7
			171.8	0.9898																							171.8												171.8
			171.9	0.9932																							171.9												171.9
			172	0.9881																							172												172
			172.1	0.9881																							172.1												172.1
			172.2	0.9881																							172.2												172.2
			172.3	0.9881																							172.3												172.3
			172.4	0.9932																							172.4												172.4
			172.5	0.9915																							172.5												172.5
			172.6	0.9915																							172.6												172.6
			172.7	0.9898																							172.7												172.7
			172.8	0.9881																							172.8												172.8
			172.9	0.9932																							172.9												172.9
			173	0.9949																							173												173
			173.1	0.9949																							173.1												173.1
			173.2	0.9949																							173.2												173.2
			173.3	0.9966																							173.3												173.3
			173.4	0.9932																							173.4												173.4
			173.5	0.9949																							173.5												173.5
			173.6	0.9932																							173.6												173.6
			173.7	0.9966																							173.7												173.7
			173.8	0.9898																							173.8												173.8
			173.9	0.9898																							173.9												173.9
			174	0.9898																							174												174
			174.1	0.9932																							174.1												174.1
			174.2	0.9949																							174.2												174.2
			174.3	0.9966																							174.3												174.3
			174.4	0.9983																							174.4												174.4
			174.5	0.9983																							174.5												174.5
			174.6	0.9983																							174.6												174.6
			174.7	1.0034																							174.7												174.7
			174.8	1.0051																							174.8												174.8
			174.9	1																							174.9												174.9
			175	1																							175												175
			175.1	1																							175.1												175.1
			175.2	0.9966																							175.2												175.2
			175.3	0.9932																							175.3												175.3
			175.4	0.9949																							175.4												175.4
			175.5	0.9966																							175.5												175.5
			175.6	0.9983																							175.6												175.6
			175.7	0.9983																							175.7												175.7
			175.8	0.9983																							175.8												175.8
			175.9	0.9983																							175.9												175.9
			176	1																							176												176
			176.1	1																							176.1												176.1
			176.2	1.0034																							176.2												176.2
			176.3	1.0051																							176.3												176.3
			176.4	1.0051																							176.4												176.4
			176.5	1.0017																							176.5												176.5
			176.6	1.0034																							176.6												176.6
			176.7	1																							176.7												176.7
			176.8	0.9983																							176.8												176.8
			176.9	0.9983																							176.9												176.9
			177	0.9983																							177												177
			177.1	0.9949																							177.1												177.1
			177.2	0.9983																							177.2												177.2
			177.3	0.9983																							177.3												177.3
			177.4	1																							177.4												177.4
			177.5	1.0017																							177.5												177.5
			177.6	1.0051																							177.6												177.6
			177.7	1.0017																							177.7												177.7
			177.8	1.0034																							177.8												177.8
			177.9	1.0034																							177.9												177.9
			178	1.0085																							178												178
			178.1	1.0085																							178.1												178.1
			178.2	1.0102																							178.2												178.2
			178.3	1.0085																							178.3												178.3
			178.4	1.0051																							178.4												178.4
			178.5	1.0051																							178.5												178.5
			178.6	1.0068																							178.6												178.6
			178.7	1.0017																							178.7												178.7
			178.8	1.0017																							178.8												178.8
			178.9	1																							178.9												178.9
			179	0.9983																							179												179
			179.1	0.9983																							179.1												179.1
			179.2	0.9966																							179.2												179.2
			179.3	1																							179.3												179.3
			179.4	0.9983																							179.4												179.4
			179.5	1																							179.5												179.5
			179.6	1																							179.6												179.6
			179.7	1.0017																							179.7												179.7
			179.8	1																							179.8												179.8
			179.9	1.0017																							179.9												179.9
			180	1.0034																							180												180
			180.1	1.0034																							180.1												180.1
			180.2	1.0017																							180.2												180.2
			180.3	1.0034																							180.3												180.3
			180.4	1.0034																							180.4												180.4
			180.5	1.0051																							180.5												180.5
			180.6	1.0051																							180.6												180.6
			180.7	1.0068																							180.7												180.7
			180.8	1.0034																							180.8												180.8
			180.9	1.0017																							180.9												180.9
			181	1.0034																							181												181
			181.1	0.9983																							181.1												181.1
			181.2	1																							181.2												181.2
			181.3	1																							181.3												181.3
			181.4	0																							181.4												181.4
			181.5	0																							181.5												181.5
			181.6	0																							181.6												181.6
			181.7	0																							181.7												181.7
			181.8	0																							181.8												181.8
			181.9	0																							181.9												181.9
			182	0																							182												182
			182.1	0																							182.1												182.1
			182.2	0																							182.2												182.2
																											182.3												182.3
																											182.4												182.4
																											182.5												182.5
																											182.6												182.6
																											182.7												182.7
																											182.8												182.8
																											182.9												182.9
																											183												183
																											183.1												183.1
																											183.2												183.2
																											183.3												183.3
																											183.4												183.4
																											183.5												183.5
																											183.6												183.6
																											183.7												183.7
																											183.8												183.8
																											183.9												183.9
																											184												184
																											184.1												184.1
																											184.2												184.2
																											184.3												184.3
																											184.4												184.4
																											184.5												184.5
																											184.6												184.6
																											184.7												184.7
																											184.8												184.8
																											184.9												184.9
																											185												185
																											185.1												185.1
																											185.2												185.2
																											185.3												185.3
																											185.4												185.4
																											185.5												185.5
																											185.6												185.6
																											185.7												185.7
																											185.8												185.8
																											185.9												185.9
																											186												186
																											186.1												186.1
																											186.2												186.2
																											186.3												186.3
																											186.4												186.4
																											186.5												186.5
																											186.6												186.6
																											186.7												186.7
																											186.8												186.8
																											186.9												186.9
																											187												187
																											187.1												187.1
																											187.2												187.2
																											187.3												187.3
																											187.4												187.4
																											187.5												187.5
																											187.6												187.6
																											187.7												187.7
																											187.8												187.8
																											187.9												187.9
																											188												188
																											188.1												188.1
																											188.2												188.2
																											188.3												188.3
																											188.4												188.4
																											188.5												188.5
																											188.6												188.6
																											188.7												188.7
																											188.8												188.8
																											188.9												188.9
																											189												189
																											189.1												189.1
																											189.2												189.2
																											189.3												189.3
																											189.4												189.4
																											189.5												189.5
																											189.6												189.6
																											189.7												189.7
																											189.8												189.8
																											189.9												189.9
																											190												190
																											190.1												190.1
																											190.2												190.2
																											190.3												190.3
																											190.4												190.4
																											190.5												190.5
																											190.6												190.6
																											190.7												190.7
																											190.8												190.8
																											190.9												190.9
																											191												191
																											191.1												191.1
																											191.2												191.2
																											191.3												191.3
																											191.4												191.4
																											191.5												191.5
																											191.6												191.6
																											191.7												191.7
																											191.8												191.8
																											191.9												191.9
																											192												192
																											192.1												192.1
																											192.2												192.2
																											192.3												192.3
																											192.4												192.4
																											192.5												192.5
																											192.6												192.6
																											192.7												192.7
																											192.8												192.8
																											192.9												192.9
																											193												193
																											193.1												193.1
																											193.2												193.2
																											193.3												193.3
																											193.4												193.4
																											193.5												193.5
																											193.6												193.6
																											193.7												193.7
																											193.8												193.8
																											193.9												193.9
																											194												194
																											194.1												194.1
																											194.2												194.2
																											194.3												194.3
																											194.4												194.4
																											194.5												194.5
																											194.6												194.6
																											194.7												194.7
																											194.8												194.8
																											194.9												194.9
																											195												195
																											195.1												195.1
																											195.2												195.2
																											195.3												195.3
																											195.4												195.4
																											195.5												195.5
																											195.6												195.6
																											195.7												195.7
																											195.8												195.8
																											195.9												195.9
																											196												196
																											196.1												196.1
																											196.2												196.2
																											196.3												196.3
																											196.4												196.4
																											196.5												196.5
																											196.6												196.6
																											196.7												196.7
																											196.8												196.8
																											196.9												196.9
																											197												197
																											197.1												197.1
																											197.2												197.2
																																							197.3
																																							197.4
																																							197.5
																																							197.6
																																							197.7
																																							197.8
																																							197.9
																																							198
																																							198.1
																																							198.2
																																							198.3
																																							198.4
																																							198.5
																																							198.6
																																							198.7
																																							198.8
																																							198.9
																																							199
																																							199.1
																																							199.2
																																							199.3
																																							199.4
																																							199.5
																																							199.6
																																							199.7
																																							199.8
																																							199.9
[truncated: 93 more rows]
