# Supplementary material for: The fluoride permeation pathway and anion recognition in Fluc family fluoride channels
Source: eLife. 2021 Jul 12;10:e69482. doi: 10.7554/eLife.69482 (PMC8315801; doi:10.7554/eLife.69482)
Supplement: Figure 4—source data 5. [file elife-69482-fig4-data5.xlsx]

## Sheet: Sheet1
Light scattering	no protein	0	969.175	0	978.084	0	970.359		Fluc-Bpe	0	1242.11	0	1192.59	0	1199.65			no protein	0	720.159	0	833.414	0	958.814		Fluc-Bpe	0	742.227	0	879.361	0	832.088
	300mM KCl	1	993.067	1	995.487	1	978.472		300mM KCl	1	1241.18	1	1196.6	1	1202.06			300mM KF	1	732.562	1	856.511	1	962.097		300mM KF	1	746.594	1	886.45	1	836.085
		2	1024.99	2	976.579	2	999.17			2	1247.14	2	1189.98	2	1189.26				2	717.664	2	832.888	2	962.719			2	765.203	2	867.631	2	832.631
		3	979.146	3	984.983	3	986.608			3	1226.9	3	1192.28	3	1199.9				3	751.851	3	1013.23	3	958.85			3	746.26	3	882.47	3	824.189
		4	990.775	4	978.529	4	965.532			4	1226.97	4	1186.19	4	1207.03				4	715.737	4	858.16	4	958.865			4	749.345	4	879.553	4	822.509
		5	982.229	5	994.454	5	960.516			5	1232.31	5	1189.15	5	1198.26				5	712.663	5	852.213	5	954.515			5	741.76	5	879.916	5	856.544
		6	992.008	6	982.175	6	959.027			6	1228.51	6	1214.08	6	1189.77				6	725.256	6	833.519	6	968.712			6	739.843	6	877.35	6	852.042
		7	966.789	7	986.96	7	972.112			7	1230.66	7	1212.26	7	1195.97				7	701.631	7	897.956	7	962.137			7	747.945	7	899.486	7	866.816
		8	983.958	8	997.796	8	962.198			8	1234.7	8	1197.78	8	1199.77				8	716.255	8	840.607	8	967.94			8	749.659	8	876.988	8	830.158
		9	979.614	9	980.325	9	961.203			9	1244.03	9	1196.49	9	1203.48				9	728.051	9	856.352	9	977.775			9	750.174	9	881.71	9	822.374
		10	978.117	10	991.066	10	988.724			10	1245.8	10	1198.44	10	1194.38				10	722.453	10	914.171	10	962.606			10	743.832	10	885.138	10	829.733
		11	973.221	11	986.029	11	1070.79			11	1226.88	11	1192.68	11	1194.35				11	713.674	11	833.847	11	957.376			11	757.662	11	873.025	11	830.998
		12	968.718	12	977.567	12	962.187			12	1251.86	12	1196.16	12	1198.73				12	746.897	12	851.374	12	962.259			12	748.09	12	875.189	12	841.139
		13	973.258	13	980.613	13	967.883			13	1241.72	13	1191.36	13	1193.07				13	718.952	13	839.913	13	969.497			13	749.939	13	880.316	13	829.201
		14	972.823	14	980.416	14	968.094			14	1231.17	14	1201.98	14	1194.97				14	710.093	14	851.948	14	961.137			14	743.497	14	873.593	14	825.438
		15	971.148	15	971.385	15	964.357			15	1236.97	15	1209.16	15	1192.69				15	710.074	15	841.15	15	976.53			15	741.107	15	891.153	15	838.855
		16	985.236	16	990.339	16	958.218			16	1277.51	16	1185.95	16	1198.02				16	713.238	16	871.177	16	960.422			16	748.642	16	873.766	16	837.065
		17	973.499	17	978.903	17	956.897			17	1290.6	17	1211.57	17	1195.73				17	712.208	17	839.362	17	966.489			17	741.594	17	892.417	17	838.156
		18	1014.56	18	981.932	18	967.32			18	1239.1	18	1217.99	18	1201				18	714.59	18	845.608	18	957.322			18	742.834	18	870.208	18	844.926
		19	966.175	19	994.965	19	963.061			19	1258.87	19	1196.71	19	1198.23				19	707.701	19	837.581	19	965.493			19	740.083	19	894.696	19	824.083
		20	978.733	20	995.49	20	965.592			20	1251.31	20	1231.5	20	1196.84				20	719.805	20	836.44	20	955.673			20	742.815	20	877.121	20	831.576
		21	978.251	21	975.675	21	963.84			21	1231.76	21	1204.55	21	1210.38				21	773.565	21	843.198	21	964.003			21	751.339	21	870.868	21	825.942
		22	1009.57	22	998.363	22	979.537			22	1236.4	22	1198.61	22	1214.02				22	717.838	22	933.34	22	967.296			22	742.74	22	874.725	22	825.033
		23	981.623	23	982.02	23	967.161			23	1237.92	23	1195.98	23	1210.13				23	705.364	23	824.823	23	965.317			23	743.425	23	915.085	23	822.58
		24	964.543	24	1019.21	24	962.447			24	1235.89	24	1217.84	24	1196.97				24	731.596	24	848.042	24	958.596			24	753.912	24	884.022	24	827.67
		25	972.629	25	979.95	25	962.603			25	1261.52	25	1211.06	25	1204.56				25	718.323	25	1137.67	25	959.507			25	743.415	25	908.964	25	850.426
		26	982.235	26	1022.15	26	961.195			26	1235.69	26	1199.15	26	1310.37				26	713.164	26	856.172	26	960.286			26	745.897	26	938.242	26	827.958
		27	970.029	27	986.022	27	960.098			27	1254.49	27	1203.98	27	1214.52				27	714.299	27	841.938	27	968.964			27	745.656	27	881.69	27	863.244
		28	968.843	28	982.738	28	964.944			28	1248.08	28	1195.72	28	1202.87				28	708.993	28	841.175	28	962.733			28	759.979	28	879.463	28	825.231
		29	978.811	29	985.488	29	960.701			29	1230	29	1193.13	29	1199.35				29	733.804	29	842.248	29	977.722			29	752.448	29	876.993	29	840.732
		30	983.456	30	989.881	30	965.002			30	1241.51	30	1201.62	30	1223.09				30	707.94	30	860.291	30	959.662			30	744.382	30	899.022	30	822.369
		31	973.248	31	1020.36	31	969.811			31	1241.3	31	1267.69	31	1202.41				31	712.1	31	832.051	31	964.405			31	747.715	31	876.152	31	836.688
		32	980.203	32	981.273	32	961.634			32	1234.81	32	1199.38	32	1207.81				32	706.704	32	943.336	32	966.763			32	744.202	32	884.637	32	823.255
		33	974.518	33	993.522	33	959.909			33	1246.64	33	1202.82	33	1211.78				33	724.38	33	840.874	33	963.451			33	747.659	33	872.44	33	830.003
		34	967.745	34	993.683	34	958.586			34	1264.88	34	1219.43	34	1204.88				34	708.632	34	851.184	34	959.484			34	752.085	34	877.378	34	824.255
		35	982.71	35	985.891	35	959.818			35	1239.62	35	1199.15	35	1200.69				35	722.259	35	833.041	35	976.099			35	748.255	35	872.823	35	849.936
		36	971.732	36	982.611	36	967.24			36	1246.39	36	1198.95	36	1196.56				36	740.424	36	856.039	36	958.523			36	742.958	36	897.45	36	840.513
		37	968.049	37	982.234	37	996.31			37	1241.34	37	1201.87	37	1207.8				37	716.414	37	838.141	37	958.901			37	745.169	37	877.946	37	862.048
		38	985.666	38	991.249	38	961.189			38	1240.73	38	1212.02	38	1222.36				38	714.131	38	940.037	38	966.52			38	751.754	38	883.445	38	843.497
		39	978.477	39	975.801	39	975.965			39	1247.69	39	1192.05	39	1208.88				39	708.485	39	868.619	39	967.549			39	748.07	39	876.061	39	835.286
		40	1008.81	40	983.332	40	959.837			40	1256.56	40	1195.97	40	1206.13				40	717.307	40	840.572	40	963.973			40	786.417	40	870.938	40	819.861
		41	969.448	41	981.459	41	1002.48			41	1294.47	41	1204.42	41	1217.09				41	717.403	41	879.459	41	980.97			41	744.83	41	884.973	41	844.602
		42	969.263	42	1005.92	42	967.968			42	1239.15	42	1193.97	42	1205.7				42	702.778	42	852.895	42	969.034			42	763.792	42	876.065	42	832.684
		43	995.274	43	983.681	43	962.951			43	1250.49	43	1210.09	43	1214.13				43	707.362	43	840.853	43	964.569			43	752.253	43	894.893	43	823.263
		44	972.051	44	980.528	44	963.511			44	1238.56	44	1204.65	44	1217.66				44	710.682	44	864.016	44	954.666			44	751.435	44	878.266	44	845.925
		45	973.213	45	975.779	45	964.351			45	1241.82	45	1203.87	45	-1.15651				45	715.902	45	856.204	45	964.271			45	751.276	45	882.938	45	838.421
		46	993.251	46	979.599	46	1004.32			46	1243.44	46	1198.71	46	-0.825071				46	711.32	46	857.76	46	984.072			46	761.24	46	887.818	46	829.906
		47	983.207	47	977.739	47	975.417			47	1240.87	47	1201.51	47	1229.1				47	709.018	47	869.946	47	968.405			47	744.938	47	893.607	47	826.446
		48	991.502	48	976.58	48	962.801			48	1248.36	48	1200.1	48	1221.56				48	704.612	48	833.919	48	971.395			48	749.415	48	905	48	825.551
		49	973.871	49	981.747	49	967.093			49	1256.25	49	1205.68	49	1220.66				49	708.19	49	834.488	49	979.794			49	762.954	49	880.37	49	888.966
		50	979.198	50	1033.69	50	975.531			50	1245.25	50	1235.8	50	1215.98				50	706.63	50	846.24	50	970.624			50	753.718	50	892.569	50	-0.913858
		51	976.917	51	985.746	51	963.528			51	1265.88	51	1202.47	51	1223.04				51	707.628	51	845.707	51	964.478			51	749.917	51	881.121	51	-0.50575
		52	992.653	52	1032.12	52	961.145			52	1238.69	52	1203.41	52	1224.58				52	733.037	52	843.027	52	957.562			52	747.373	52	890.883	52	989.443
		53	994.694	53	978.298	53	968.683			53	1253.28	53	1231.31	53	1214.88				53	748.624	53	844.294	53	965.292			53	744.009	53	890.267	53	1058.39
		54	981.691	54	976.049	54	964.247			54	1251.29	54	1207.62	54	1210.86				54	704.841	54	841.281	54	966.209			54	749.524	54	882.92	54	1089.32
		55	977.617	55	988.925	55	975.058			55	1240.23	55	1201.71	55	1205.98				55	753.057	55	830.906	55	954.791			55	747.536	55	894.885	55	1104.2
		56	979.278	56	983.491	56	962.441			56	1255.94	56	1206.99	56	1222.23				56	715.67	56	838.234	56	971.789			56	744.62	56	892.146	56	1107.8
		57	974.291	57	979.297	57	963.194			57	1241.85	57	1202.71	57	1216.58				57	704.472	57	836.583	57	972.436			57	747.764	57	877.495	57	1148.86
		58	977.072	58	996.292	58	966.936			58	1243.22	58	1213.74	58	1214.17				58	726.577	58	833.341	58	967.939			58	746.109	58	879.752	58	1123.25
		59	979.612	59	980.832	59	960.935			59	1253.85	59	1203.43	59	1218.15				59	717.693	59	844.925	59	973.739			59	753.703	59	877.544	59	1145.01
		60	985.674	60	1024.24	60	971.918			60	1244.21	60	1220.15	60	1210.87				60	713.071	60	852.048	60	972.425			60	742.827	60	878.54	60	1143.97
		61	974.495	61	1010.96	61	963.439			61	1241.67	61	1202.56	61	1231.54				61	741.705	61	917.867	61	964.132			61	753.567	61	869.472	61	1127.51
		62	979.102	62	978.234	62	966.016			62	1247.38	62	1202.51	62	1220.55				62	709.149	62	858.15	62	975.001			62	748.764	62	877.166	62	1128.23
		63	978.337	63	982.847	63	961.803			63	1247.43	63	1206.15	63	1219.48				63	710.213	63	834.678	63	964.996			63	747.564	63	879.341	63	1143.89
		64	987.25	64	983.98	64	967.678			64	1243.29	64	1201.19	64	1206.99				64	787.711	64	844.904	64	968.489			64	749.665	64	881.623	64	1170.63
		65	975.269	65	982.791	65	966.931			65	1249.09	65	1204.53	65	1224.11				65	708.88	65	936.389	65	971.356			65	745.227	65	876.854	65	1137.42
		66	980.037	66	1033.69	66	963.289			66	1235.58	66	1209.2	66	1246.89				66	754.464	66	836.023	66	961.795			66	748.503	66	887.636	66	1139.67
		67	992.821	67	981.407	67	967.066			67	1239.35	67	1255.78	67	1214.3				67	706.696	67	855.335	67	963.973			67	748.409	67	874.848	67	1151.68
		68	975.555	68	980.812	68	968.134			68	1252.47	68	1202.89	68	1226.3				68	707.783	68	841.551	68	961.38			68	747.158	68	879.856	68	1153.7
		69	993.795	69	1015.69	69	969.192			69	1257.95	69	1204.63	69	1220.71				69	710.641	69	842.626	69	965.406			69	746.775	69	869.341	69	1160.49
		70	1000.9	70	995.419	70	963.972			70	1248.22	70	1206.87	70	1220.96				70	713.678	70	837.045	70	967.604			70	747.404	70	880.15	70	1160.64
		71	998.204	71	996.696	71	965.747			71	1240.07	71	1207.01	71	1219.21				71	711.074	71	842.339	71	965.061			71	755.725	71	702.08	71	1148.93
		72	987.426	72	983.579	72	971.843			72	1242.32	72	1233.77	72	1215.71				72	707.549	72	852.479	72	994.771			72	755.643	72	-0.784735	72	1169.59
		73	975.967	73	982.741	73	965.695			73	1255.83	73	1213.13	73	1230.43				73	711.529	73	835.332	73	973.124			73	750.627	73	668.2	73	1155.11
		74	983.209	74	982.668	74	963.307			74	1273.12	74	1203.09	74	1223.56				74	709.587	74	972.903	74	962.242			74	747.17	74	1444.37	74	1150.38
		75	976.913	75	1018.62	75	963.845			75	1245.49	75	1210.88	75	1223.96				75	730.73	75	840.518	75	968.244			75	756.424	75	1130.03	75	1165.71
		76	971.924	76	980.401	76	973.559			76	1262.61	76	1215.46	76	1230.52				76	715.354	76	-1.1563	76	964.067			76	753.721	76	1162.16	76	1167.99
		77	982.944	77	977.432	77	969.523			77	1257.41	77	1219.46	77	1219.46				77	741.665	77	-0.541689	77	966.585			77	749.205	77	1172.98	77	1161.99
		78	-1.721	78	980.159	78	992.814			78	1265.72	78	1207.17	78	1214.18				78	712.885	78	986.508	78	963.06			78	751.964	78	1184.45	78	1176.58
		79	-1.03594	79	987.24	79	963.517			79	1250.22	79	1206.21	79	1231.42				79	703.323	79	951.321	79	961.855			79	747.578	79	1186.1	79	1185.43
		80	1048.89	80	996.676	80	964.504			80	1258.5	80	1250.51	80	1219.95				80	743.968	80	1261.37	80	959.789			80	744.78	80	1205.26	80	1171.29
		81	1011.71	81	980.753	81	966.402			81	1243.1	81	1208.31	81	1216.96				81	732.583	81	903.932	81	-1.44569			81	752.244	81	1195.57	81	1155.46
		82	1001.23	82	977.936	82	973.047			82	1261.66	82	1207.64	82	1226.56				82	707.798	82	875.48	82	-0.572813			82	744.636	82	1204.94	82	1168.98
		83	991.777	83	980.665	83	965.986			83	1244.67	83	1206.36	83	1215.28				83	715.848	83	871.865	83	1007.1			83	750.992	83	1206.86	83	1165.42
		84	997.79	84	977.914	84	961.947			84	1244.29	84	1211.29	84	1238.86				84	717.993	84	919.878	84	993.172			84	748.874	84	1201.63	84	1178.68
		85	993.126	85	1014.7	85	966.485			85	1270.73	85	1215.99	85	1215.39				85	712.172	85	1063.91	85	1003.5			85	744.925	85	1200.87	85	1171.24
		86	1021.88	86	1001.1	86	971.203			86	1247.6	86	1208.21	86	1222.95				86	723.471	86	859.58	86	1006.53			86	750.046	86	1198.34	86	1174.6
		87	998.325	87	986.214	87	970.604			87	1242.23	87	1213.49	87	1221.72				87	710.085	87	859.086	87	1006.22			87	743.895	87	1202.83	87	1184.01
		88	987.575	88	978.32	88	970.064			88	1247.54	88	1214.53	88	1225.42				88	706.279	88	869.064	88	996.663			88	750.639	88	1240.51	88	1173.35
		89	992.892	89	983.748	89	973.416			89	1244.36	89	1224.52	89	1223.82				89	762.828	89	861.639	89	1004.93			89	757.081	89	1210	89	1171.82
		90	996.769	90	981.294	90	970.196			90	1248.81	90	1212.81	90	1222.47				90	712.256	90	867.881	90	993.917			90	752.394	90	1220.76	90	1172.07
		91	1014.94	91	982.088	91	969.344			91	1260.42	91	1215.07	91	1224.21				91	720.47	91	883.125	91	1003.54			91	751.829	91	1219.94	91	1164.33
		92	984.985	92	983.542	92	971.298			92	1257.81	92	1249.27	92	1225.15				92	707.594	92	884.873	92	1000.01			92	752.153	92	1216.09	92	1172.17
		93	989.836	93	987.464	93	967.38			93	1243.13	93	1209.88	93	1235.82				93	704.953	93	881.802	93	1002.56			93	751.01	93	1231.04	93	1188.56
		94	1014.07	94	980.459	94	976.051			94	1249.37	94	1215.31	94	1227.25				94	704.218	94	881.721	94	1009.22			94	760.294	94	1220.26	94	1185.57
		95	1004.53	95	983.341	95	966.682			95	1247.47	95	1220.27	95	1225.61				95	709.837	95	998.437	95	998.008			95	749.752	95	1213.13	95	1176.38
		96	989.665	96	973.85	96	968.317			96	-2.20208	96	1211.31	96	1241.55				96	781.119	96	863.263	96	999.087			96	750.847	96	1225.81	96	1208.14
		97	1005.62	97	977.299	97	970.235			97	-0.896316	97	1205.37	97	1222.57				97	712.522	97	883.839	97	1000.97			97	750.533	97	1223.93	97	1195.54
		98	1012.2	98	977.062	98	979.498			98	1273.46	98	1223.36	98	1240.73				98	716.894	98	865.258	98	1000.89			98	750.626	98	1210.19	98	1199.58
		99	991.991	99	978.37	99	974.218			99	1262.59	99	-1.03004	99	1227.02				99	705.36	99	863.081	99	1021.46			99	751.255	99	1229.28	99	1207.22
		100	995.489	100	992.787	100	970.406			100	1291.68	100	-0.722677	100	1233.35				100	737.332	100	1142.53	100	998.225			100	-1.43597	100	1219.34	100	1182.74
		101	993.048	101	-2.6323	101	971.052			101	1259.4	101	1236.59	101	1250.13				101	733.201	101	982.013	101	1005.92			101	-0.578127	101	1213.32	101	1178.38
		102	993.39	102	-1.21954	102	969.615			102	1261.25	102	1240.49	102	1248.24				102	715.69	102	876.362	102	1002.81			102	847.461	102	1219.69	102	1185.54
		103	1011.61	103	-1.02357	103	978.94			103	1254.1	103	1225.84	103	1230.92				103	709.365	103	863.98	103	1015.58			103	936.425	103	1227.88	103	1218.44
		104	996.959	104	1008.52	104	966.847			104	1268.95	104	1335.97	104	1227.2				104	708.819	104	918.107	104	999.524			104	1017.46	104	1228.56	104	1188.07
		105	991.804	105	993.481	105	976.001			105	1261.62	105	1231.2	105	1233.05				105	743.872	105	898.721	105	1006.63			105	1003.24	105	1225.93	105	1189.41
		106	998.963	106	1022.31	106	-2.24158			106	1250.39	106	1225.8	106	1245.24				106	706.779	106	880.28	106	1003.41			106	1018.08	106	1224.39	106	1196.5
		107	992.605	107	990.394	107	-1.00327			107	1258.34	107	1229.18	107	1233.34				107	707.94	107	902.27	107	1002.49			107	1040.88	107	1226.21	107	1199.45
		108	990.584	108	1057.71	108	999.493			108	1260.26	108	1237.45	108	1262.13				108	716.232	108	947.691	108	1012.85			108	1022.84	108	1243.7	108	1184.55
		109	993.223	109	1002.91	109	983.943			109	1262.62	109	1242.75	109	1232.59				109	732.446	109	871.432	109	1008.95			109	1027.74	109	1265.8	109	1212.02
		110	988.717	110	995.311	110	1022.72			110	1263.41	110	1219.31	110	1242.65				110	709.936	110	888.7	110	1008.14			110	1066.92	110	1234.04	110	1203.6
		111	987.165	111	986.465	111	981.875			111	1257.34	111	1221.1	111	1249.26				111	720.771	111	900.96	111	1021.36			111	1025.96	111	1227.86	111	1189.58
		112	1003.27	112	994.865	112	981.575			112	1263.27	112	1258.94	112	1232.58				112	713.283	112	893.252	112	1051.36			112	1037.25	112	1240.17	112	1198.27
		113	1005.93	113	995.321	113	975.823			113	1249.09	113	1218.96	113	1233.53				113	719.091	113	887.271	113	1009.54			113	1041.96	113	1281.69	113	1214.7
		114	987.122	114	991.869	114	1002.78			114	1280.15	114	1234.16	114	1235.42				114	717.38	114	907.088	114	1023.45			114	1040.03	114	1237.94	114	1198.97
		115	985.961	115	1021.14	115	979.653			115	1251.12	115	1224.02	115	1234.73				115	717.283	115	884.526	115	1018.36			115	1038.53	115	1238.48	115	1200.57
		116	993.191	116	984.826	116	976.486			116	1254.23	116	1239.51	116	1237.11				116	706.56	116	875.436	116	1024.31			116	1041.24	116	1233.22	116	-0.828101
		117	1013.85	117	984.485	117	1005.69			117	1259.95	117	1222.75	117	1247.29				117	715.458	117	922.9	117	1021.93			117	1043.08	117	1238.7	117	-0.485482
		118	992.848	118	985.703	118	970.836			118	1249.96	118	1220.51	118	1247.9				118	723.493	118	880.251	118	1020.57			118	1042.3	118	1237.99	118	1344.44
		119	994.111	119	994.98	119	1018.8			119	1258.89	119	1217.57	119	1234.72				119	708.068	119	891.481	119	1033.1			119	1052.17	119	1233.67	119	1392.03
		120	1006.67	120	999.342	120	969.635			120	1251.61	120	1232.21	120	1240.95				120	270.117	120	901.186	120	1031.53			120	1067.68	120	1234.77	120	1400.05
		121	1002.28	121	1006.1	121	1009.9			121	1280.04	121	1217.86	121	-1.15071				121	-0.77551	121	888.972	121	1019.82			121	1042.22	121	1243.23	121	1407.38
		122	998.929	122	991.385	122	973.003			122	1251.22	122	1352.48	122	-0.823017				122	-0.463372	122	909.657	122	1027.34			122	1055.83	122	1225.21	122	1413.94
		123	995.867	123	987.053	123	973.843			123	1275.44	123	1231.6	123	2609.28				123	747.594	123	897.722	123	1025.05			123	1049.43	123	1230.41	123	1437.97
		124	991.099	124	994.039	124	972.795			124	1251.92	124	1212.09	124	2596.02				124	741.926	124	902.84	124	1027.51			124	1046.3	124	1230.16	124	1413.86
		125	1004.17	125	992.042	125	971.521			125	1252.9	125	1225.94	125	2533.37				125	775.761	125	886.372	125	1030.14			125	1048.01	125	1251.33	125	1423.06
		126	1026.55	126	993.345	126	975.475			126	1257.54	126	1235.4	126	2526.09				126	736.603	126	1003.43	126	1036.33			126	1136.28	126	1234.29	126	1450.61
		127	1025.18	127	981.669	127	972.94			127	1267.25	127	1249.36	127	2504.72				127	764.833	127	908.688	127	1031.45			127	1053.93	127	1239.93	127	1425.6
		128	1001.97	128	1045.63	128	968.658			128	1266.86	128	1283.16	128	2437.53				128	745.874	128	887.654	128	1043.63			128	1054.97	128	1228.19	128	1447.18
		129	1009.69	129	982.839	129	966.84			129	1301.14	129	1237.23	129	2454.09				129	741.851	129	903.054	129	1026.93			129	1050.97	129	1233.83	129	1429.22
		130	1016.9	130	1008.72	130	968.683			130	1247.84	130	1239.48	130	2430.19				130	750.423	130	1176.24	130	1032.02			130	1053.38	130	1234.48	130	1438
		131	1014.14	131	991.832	131	988.394			131	1262.94	131	1228.23	131	2417.32				131	739.954	131	895.268	131	1036.12			131	1070.87	131	1238.06	131	1423.19
		132	1006.76	132	1003.67	132	1016.53			132	1255.61	132	1233.76	132	2423.29				132	743.133	132	984.379	132	1032.97			132	1055.29	132	1264.52	132	1454.53
		133	1007.15	133	991.882	133	969.479			133	1257.48	133	1224.06	133	2419.59				133	740.445	133	919.866	133	1045.63			133	1061.61	133	1243.66	133	1434.48
		134	1001.38	134	988.109	134	968.491			134	1259.21	134	1217.07	134	2402.63				134	743.659	134	896.696	134	1043.2			134	1061.11	134	1257.85	134	1425.68
		135	998.642	135	987.044	135	973.249			135	1278.97	135	1222.59	135	2394.98				135	744.334	135	903.793	135	1044.2			135	1059.49	135	1247.16	135	1456.6
		136	1025.53	136	1017.26	136	973.387			136	1270.76	136	1224.99	136	2375.4				136	745.214	136	903.659	136	1045.16			136	1058.78	136	1234.37	136	1435.87
		137	1022.75	137	982.99	137	976.264			137	1266.18	137	1219.94	137	2351.4				137	745.771	137	942.998	137	1052.56			137	1069.92	137	1265.34	137	1458.36
		138	1031.4	138	984.55	138	973.696			138	1258.31	138	1229.81	138	2379.39				138	748.077	138	906.38	138	1051.83			138	1059.54	138	1252.2	138	1422.85
		139	1033.67	139	985.252	139	971.927			139	1259.11	139	1219.21	139	2356.99				139	755.055	139	911.746	139	1054.65			139	1059.66	139	1286.79	139	1435.09
		140	1011.9	140	996.671	140	984.178			140	1255.78	140	1223.97	140	2389.63				140	744.233	140	903.002	140	1052.06			140	1064.62	140	1330.52	140	1438.85
		141	1009.62	141	986.5	141	973.05			141	1261.82	141	1279.86	141	2331.85				141	755.833	141	906.027	141	1054.57			141	1058.61	141	1244.89	141	1445.87
		142	1004.57	142	984.292	142	981.386			142	1269.66	142	1232.15	142	2343.65				142	746.832	142	1114.36	142	1045.6			142	1067.09	142	1236.67	142	1467.01
		143	1000.39	143	986.952	143	971.076			143	1277.11	143	1227.25	143	2366.81				143	772.862	143	913.04	143	1055.82			143	1146.2	143	1270.6	143	1449.68
		144	1008.55	144	1002.9	144	978.467			144	1280.06	144	1245.52	144	2330.65				144	742.445	144	905.76	144	1070.15			144	1067.31	144	1243.18	144	1449.44
		145	1011.59	145	1000.06	145	979.173			145	1268.49	145	1227.54	145	2356.66				145	741.045	145	908.131	145	1057.42			145	1142.44	145	1277.88	145	1424.31
		146	1027.97	146	987.02	146	986.336			146	1262.18	146	1229.24	146	2339.35				146	742.013	146	920.632	146	1075.38			146	1067.87	146	1252.79	146	1428.39
		147	1007.82	147	989.86	147	982.125			147	1270.44	147	1229.58	147	2334.53				147	765.948	147	913.482	147	1061.64			147	1074.69	147	1244.81	147	1447.5
		148	1002.28	148	986.931	148	982.288			148	1257.41	148	1224.16	148	2339.95				148	759.741	148	913.787	148	1060.38			148	1072.66	148	1243.84	148	1437.22
		149	1028.36	149	988.805	149	1101.38			149	1278.3	149	1230.58	149	2361.51				149	743.15	149	1070.73	149	1060.66			149	1077.8	149	1244.41	149	1455.67
		150	1013.43	150	982.458	150	976.745			150	1279.05	150	1267.88	150	2348.49				150	743.459	150	930.739	150	1062			150	1070.25	150	1268.61	150	1457.54
		151	1007.44	151	993.89	151	974.171			151	1265.92	151	1230.48	151	2354.3				151	739.525	151	932.429	151	1065.87			151	1087.31	151	1258.47	151	1440.09
		152	1037.83	152	993.169	152	986.252			152	1269.76	152	1227.04	152	2328.53				152	750.96	152	943.862	152	1062.36			152	1080.56	152	1250.31	152	1435.62
		153	1004.25	153	984.59	153	1001.39			153	1299.08	153	1229.16	153	2317.4				153	758.379	153	953.935	153	1072.41			153	1075.93	153	1242.38	153	1451.38
		154	1015.4	154	991.08	154	985.348			154	1270.83	154	1227.06	154	2321.31				154	750.93	154	962.372	154	1066.29			154	1080.18	154	1255.32	154	1439.49
		155	1011.64	155	-1.42603	155	985.571			155	1273.21	155	1228.42	155	2311.3				155	-1.12922	155	927.546	155	1070.2			155	1082.13	155	1251.03	155	1438.59
		156	1022.43	156	-1.06401	156	980.456			156	1269.76	156	1239.78	156	2299.11				156	-0.540008	156	1004.26	156	1063.73			156	1079.51	156	1273.36	156	1431.21
		157	1009.26	157	2131.25	157	979.292			157	1293.66	157	1221.87	157	2305.58				157	1095.52	157	931.118	157	1079.07			157	1084.65	157	1258.1	157	1446.86
		158	1014.07	158	2140.85	158	976.488			158	1268.73	158	1235.87	158	2287.62				158	1159.88	158	929.458	158	1070.25			158	1088.31	158	1264.27	158	1431.34
		159	1009.54	159	2129.89	159	978.13			159	1264.17	159	1240.3	159	2300.06				159	1243.21	159	945.638	159	1072.1			159	1108.4	159	1256.21	159	1448.19
		160	1017.42	160	2115.42	160	983.835			160	1278.42	160	1238.91	160	2294.38				160	1257.29	160	1339.57	160	1074.51			160	1090.03	160	1259.56	160	1463.08
		161	-1.38103	161	2093.01	161	983.405			161	1270.44	161	1233.6	161	2294.61				161	1282.61	161	941.689	161	1075.97			161	1084.03	161	1266.53	161	1462.79
		162	-0.978004	162	2079.54	162	983.47			162	1274.73	162	1236.79	162	2263.45				162	1292.28	162	1161.36	162	1076.07			162	1083.57	162	1288.08	162	1431.48
		163	2271.65	163	2113.27	163	979.793			163	1277.08	163	1228.63	163	2280.89				163	1307.49	163	925.878	163	1084.41			163	1146.6	163	1271.17	163	1447.49
		164	2171.57	164	2075.04	164	976.27			164	1292.27	164	1253.74	164	2279.96				164	1314.7	164	974.694	164	428.455			164	1090.33	164	1256.32	164	1449.87
		165	2150.44	165	2059.99	165	997.564			165	1273.18	165	1232.18	165	2304.14				165	1316.58	165	934.218	165	-0.767426			165	1091.58	165	1239.58	165	1440.38
		166	2150.5	166	2041.69	166	984.212			166	1272.27	166	1240.57	166	2262				166	1313.83	166	935.144	166	550.322			166	1091.91	166	-1.28858	166	1438.68
		167	2139.06	167	2053.86	167	986.596			167	1266.29	167	1240.97	167	2289.78				167	1325.14	167	933.673	167	1459.9			167	1191.95	167	-0.565447	167	1440.43
		168	2104.67	168	2047.78	168	980.812			168	1283.78	168	1235.82	168	2268.02				168	1321.39	168	1114.26	168	1567.6			168	1166.15	168	1419.86	168	1441.89
		169	2091.66	169	2036.78	169	984.743			169	1279.95	169	1246.58	169	2281.23				169	1342.27	169	957.777	169	1626.58			169	1106.85	169	1464.48	169	1426.88
		170	2088.96	170	2005.35	170	984.218			170	1271.24	170	1238.8	170	2289.2				170	1333.52	170	1097.14	170	1665.11			170	1134.32	170	1475.65	170	1423.91
		171	2081.79	171	2008.67	171	992.046			171	1285.24	171	1258.15	171	2275.78				171	1333.04	171	956.427	171	1679.42			171	1103.44	171	1482.01	171	1427.7
		172	2068.49	172	2030.21	172	985.815			172	1274.64	172	1287.58	172	2254.33				172	1325.74	172	943.805	172	1703.88			172	1095.03	172	1490.95	172	1434.79
		173	2051.65	173	2011.83	173	994.165			173	1301.69	173	1244.9	173	2230.13				173	1331.6	173	980.468	173	1703.83			173	1097.65	173	1491.67	173	1432.31
		174	2082.75	174	1980.32	174	1005.45			174	1288.26	174	1249.25	174	2262.5				174	1369.75	174	979.992	174	1714.75			174	1096.1	174	1511.34	174	1449.31
		175	2052.91	175	1982.13	175	986.384			175	1296.48	175	1247.26	175	2268.98				175	1336.83	175	945.729	175	1729.18			175	1099.52	175	1553.97	175	1467.03
		176	2029.82	176	1975.11	176	987.31			176	1275.65	176	1240.09	176	2258.74				176	1340.07	176	955.038	176	1734.5			176	1101.08	176	1506.36	176	1433.28
		177	2015.2	177	1996.96	177	1005.76			177	1295.26	177	1239.21	177	2243.23				177	1345.11	177	1009.4	177	1737.76			177	1103.27	177	1523.48	177	1421.56
		178	2009.74	178	1958.19	178	988.941			178	1282.68	178	1243.26	178	2227.05				178	1343.08	178	947.059	178	1742.42			178	1099.32	178	1518.49	178	1449.52
		179	2007.95	179	1949.74	179	986.542			179	1290.19	179	1243.43	179	2225.36				179	1338.71	179	949.16	179	1742.04			179	1105.35	179	1518.94	179	1422.19
		180	1975.25	180	1938.47	180	987.883			180	1277.33	180	1245.88	180	2261.53				180	1366.01	180	959.706	180	1752.68			180	1105.97	180	1498.94	180	1456.63
		181	2000.14	181	1938.5	181	989.258			181	1289.07	181	1243.25	181	2221.77				181	1348.2	181	955.728	181	1747.89			181	1151.21	181	1511.14	181	1443.17
		182	2010.91	182	1959.98	182	989.499			182	1274.35	182	1282.77	182	2217.09				182	1362.26	182	1235.74	182	1748.6			182	1108.27	182	1506.93	182	1431.01
		183	1980.55	183	1992.53	183	996.018			183	1306.59	183	1241.8	183	2209.21				183	1339.86	183	1091.13	183	1753.36			183	1101.52	183	1524.04	183	1433.36
		184	1966.67	184	1952.75	184	987.248			184	1292	184	1253	184	2232.3				184	1351.69	184	1021.53	184	1766.59			184	1106.26	184	1518.01	184	1426.59
		185	1995.96	185	1933.21	185	991.103			185	1300.95	185	-1.08306	185	2203.5				185	1343.57	185	962.851	185	1749.73			185	1106.42	185	1524.28	185	1467.6
		186	1952.53	186	1917.01	186	988.696			186	1286.51	186	-0.724543	186	2273.06				186	1415.29	186	989.272	186	1751.08			186	1105.88	186	1547.08	186	1449.58
		187	1944.4	187	1930.86	187	995.847			187	1312.85	187	2649.9	187	2233.87				187	1346.55	187	969.226	187	1754.49			187	-2.28321	187	1523.09	187	1490.91
		188	1941.46	188	1905.07	188	997.353			188	1284.3	188	2607.64	188	2205.57				188	1594.67	188	956.839	188	1757.98			188	-0.641935	188	1504.13	188	1413.83
		189	1937.6	189	1926.9	189	991.679			189	1285.94	189	2587.22	189	2192.8				189	1338.48	189	964.15	189	1761.62			189	1170.83	189	1503.14	189	1452.98
		190	1932.93	190	1950.33	190	997.003			190	1282.88	190	2544.48	190	2203.96				190	1347.1	190	959.872	190	1760.05			190	1254.93	190	1512.32	190	1426.22
		191	1946.42	191	1924.69	191	996.936			191	1293.69	191	2505.26	191	2195.56				191	1345.2	191	1015.09	191	1763.97			191	1291.41	191	1518.08	191	1432.6
		192	1907.99	192	1895.98	192	1024.72			192	1298.14	192	2576.42	192	2190.76				192	1352.49	192	1081.66	192	1774.21			192	1301.67	192	1533.2	192	1462.76
		193	1930.95	193	1904.76	193	1009.11			193	1286.32	193	2482.96	193	2178.27				193	1343.96	193	1156.2	193	1760.19			193	1292.58	193	1534.07	193	1434.37
		194	1923.42	194	1895.46	194	998.608			194	1170.79	194	2451.2	194	2170.96				194	1344.92	194	970.555	194	1764.75			194	1303.44	194	1510.93	194	1498.45
		195	1911.93	195	1900.8	195	995.483			195	-1.04519	195	2452.7	195	2183.49				195	1342.84	195	957.971	195	1761.09			195	1303.07	195	1518.32	195	1439.8
		196	1931.43	196	1896.2	196	997.075			196	-0.749298	196	2537.87	196	2189.11				196	1356.77	196	959.175	196	1768.53			196	1299.36	196	1524.24	196	1432.69
		197	1939.15	197	1906	197	999.88			197	2669.34	197	2455.09	197	2171.43				197	1349.86	197	965.096	197	1773.99			197	1372.55	197	1518.52	197	1436.45
		198	1888.47	198	1900.96	198	995.751			198	2624.97	198	2448.33	198	2160.95				198	1352.79	198	984.475	198	1766.93			198	1317.96	198	1550.5	198	1445.55
		199	1917.41	199	1884.4	199	996.199			199	2599.65	199	2430.1	199	2176.24				199	1351.04	199	972.132	199	1764.08			199	1304.78	199	1519.92	199	1441.25
		200	1903.3	200	1907.64	200	1003.15			200	2561.55	200	2427.22	200	2203.31				200	1352.79	200	995.577	200	1764.75			200	1309.35	200	1517.14	200	1435.41
		201	1885.48	201	1897.6	201	996.298			201	2553.98	201	2426.38	201	2148.66				201	1351.23	201	975.145	201	1850.69			201	1317.29	201	1540.45	201	1475.69
		202	1869.29	202	1873.99	202	-1.90068			202	2562.46	202	2397.41	202	2143.72				202	1348.47	202	972.307	202	1870.4			202	1333.21	202	1511.01	202	1432.46
		203	1892.7	203	1885.5	203	-0.969587			203	2536.62	203	2426.87	203	2175.73				203	1346	203	1031.3	203	1768.95			203	1342.36	203	1497.9	203	1434.07
		204	1913.9	204	1871.02	204	2485.51			204	2500.96	204	2473.98	204	2163.92				204	1341.67	204	979.419	204	1790.59			204	1308.8	204	1518.79	204	1440.71
		205	1872.86	205	1876.68	205	2260.16			205	2466.79	205	2378.18	205	2139.4				205	1365.15	205	988.975	205	1777.05			205	1316.24	205	1508.58	205	1441.8
		206	1888.8	206	1863.57	206	2179.38			206	2524.92	206	2414.14						206	1346.74	206	977.351	206	1764.53			206	1309.46	206	1514.75	206	1468.77
		207	1878.92	207	1861.9	207	2136.47			207	2478.43	207	2368.43						207	1350.03	207	1024.48	207	1764.99			207	1312.67	207	1519.7	207	1448.92
		208	1858.34	208	1885.64	208	2092.25			208	2492.98	208	2392.3						208	1350.68	208	976.062	208	1780.11			208	1313.91	208	1518.94	208	1453.71
		209	1886.56	209	1887.08	209	2102.93			209	2472.73	209	2358.04						209	1473.96	209	978.208	209	1791.54			209	1305.78	209	1538.58	209	1476.63
		210	1877.14	210	1867.42	210	2090.9			210	2475	210	2363.94						210	1357.08	210	985.913	210	1770.82			210	1299.38	210	1507.17	210	1431.09
		211	1875.28	211	1855.69	211	2087.37			211	2471.47	211	2373.79						211	1346.13	211	1003.58	211	1795.53			211	1309.07	211	1513.55	211	1451.76
		212	1881.32	212	1858.85	212	2067.3			212	2443.98	212	2365.35						212	1358.6	212	1021.22	212	1817.63			212	1306.6	212	1515.61	212	1433.54
		213	1865.9	213	1842.74	213	2059.29			213	2435.81	213	2355.17						213	1353.88	213	991.022	213	1767.5			213	1308.09	213	1529.88	213	1430.96
		214	1858.59	214	1825.56	214	2042.72			214	2428.48	214	2344.3						214	1357.24	214	1005.37	214	1772.07			214	1358.38	214	1511.33	214	1449.83
		215	1863.27	215	1858.1	215	2042.22			215	2407.45	215	2373.69						215	1361.3	215	986.704	215	1770.34			215	1313.01	215	1523.54	215	1469.17
		216	1855.61	216	1862.11	216	2039.35			216	2471.03	216	2344.56						216	1364.35	216	994.872	216	1806.74			216	1309.43	216	1526.84	216	1456.58
		217	1843.82	217	1844.51	217	2022.56			217	2445.05	217	2355.75						217	1361.38	217	1143.6	217	1787.38			217	1310.03	217	1508.18	217	1430.92
		218	1906.23	218	1836.88	218	2018.35			218	2412.48	218	2363.69						218	1356.28	218	1016.51	218	1793.92			218	1308.22	218	1542.25	218	1422.52
		219	1851.07	219	1845.37	219	2021.1			219	2401.71	219	2369.89								219	1016.91	219	1771.88			219	1312.15	219	1531.7	219	1455.07
		220	1852.36	220	1842.31	220	1993.31			220	2429.05	220	2337.09								220	990.44	220	1788.38			220	1325.77	220	1513.47	220	1477.49
		221	1880.13	221	1820.15	221	2009.88			221	2393.68	221	2338.92								221	1001.81	221	1767.02			221	1311	221	1523.47	221	1435.84
		222	1858.28	222	1828.28	222	2005.23			222	2420.35	222	2325.34								222	1019.8	222	1779.15			222	1305.24	222	1527.27	222	1427.35
		223	1860.32	223	1830.26	223	1997.58			223	2389.37	223	2309.58								223	1002.45	223	1775.69			223	1310.06	223	1511.02	223	1456.02
		224	1828.39	224	1819.77	224	2004.13			224	2377.93	224	2333.89								224	992.891	224	1789.82			224	1300.51	224	1507.66	224	1431.8
		225	1827.02	225	1832.05	225	1981.38			225	2377.99	225	2309.12								225	1020.51	225	1780.51			225	1309.4	225	1510.99	225	1434.02
		226	1821.05	226	1811.63	226	1985.75			226	2382.76	226	2327.1								226	1000.17	226	1790.99			226	1316.72	226	1505.96	226	1430.83
		227	1809.4	227	1816.81	227	1980.27			227	2371.75	227	2322.02								227	999.592	227	1787.46			227	1322.84	227	1535.8	227	1437.65
		228	1844.69	228	1816.96	228	1955.42			228	2376.89	228	2318.97								228	997.672	228	1791.69			228	1317.87	228	1545.5	228	1443.96
		229	1822.61	229	1786.67	229	1981.05			229	2447.67	229	2353.77								229	1010.59	229	1789.1			229	1346.23	229	1545.24	229	1463.51
		230	1801.78	230	1831.7	230	1973.87			230	2398.76	230	2292.21								230	1040.03	230	1789.81			230	1309.75	230	1540.7	230	1435.71
		231	1778.08	231	1816.26	231	1951.55			231	2425.64	231	2323.12								231	1019.84	231	1804.4			231	1312.13	231	1530.53	231	1437.14
		232	1826.75	232	1799.82	232	1959.43			232	2401.82	232	2323.86								232	1014.91	232	1777.41			232	1315.28	232	1514.52	232	1430.27
		233	1811.15	233	1811.8	233	1945.49			233	2413.84	233	2348.91								233	1010.29	233	1779.71			233	1316.46	233	1507.56	233	1437.72
		234	1791.04	234	1788.35	234	1937.31			234	2396.45	234	2315.39								234	1000.62	234	1792.92			234	1301.88	234	1547.1	234	1440.05
		235	1769.71	235	1793.7	235	1957.92			235	2347.45	235	2307.2								235	1037.86	235	1789.23			235	1377.9	235	1513.02	235	1417.87
		236	1784.08	236	1805.1	236	1953.2			236	2345	236	2268.32								236	1018.18	236	1783.67			236	1299.63	236	1513.19	236	1473.27
		237	1789.65	237	1793.33	237	1926.71			237	2356.11	237	2293.56								237	998.964	237	1787.03			237	1301.14	237	1513.87	237	1442.65
		238	1792.65	238	1779.22	238	1939.88			238	2333.55	238	2267.92								238	1009.77	238	1777.06			238	1309.72	238	1522.71	238	1432.14
		239	1777.37	239	1782.89	239	1936.9			239	2361.87	239	2286.73								239	1022.27	239	1791.54			239	1305.57	239	1513.06	239	1442.66
		240	1805.96	240	1782.75	240	1925.43			240	2383.22	240	2270.57								240	1010.65	240	1786.6			240	1318.88	240	1517.86	240	1423.16
		241	1793.08	241	1774.04	241	1935.46			241	2336.74	241	2306.74								241	1005.84	241	1778.7			241	1313.04	241	1510.34	241	1449.01
		242	1803.47	242	1777.13	242	1929.19			242	2350.89	242	2279.7								242	1025.77	242	1792.54			242	1304.96	242	1530.16	242	1434.82
		243	1804.3	243	1761.18	243	1923.63			243	2340.31	243	2274.79								243	1030.28	243	1779.28			243	1302.24	243	1520.01	243	1438.76
		244	1774.71	244	1774.19	244	1912.53			244	2554.41	244	2260.32								244	1012.57	244	1782.36			244	1299.24	244	1502.8	244	1507.67
		245	1793.16	245	1773.83	245	1912.7			245	2344.57	245	2259.48								245	1022.03	245	1778.4			245	1314.91	245	1511.78	245	1448.65
		246	1780.58	246	1746.91	246	1912.81			246	2323.39	246	2326.85								246	1020.9	246	1783.78			246	1310.12	246	1507.43	246	1427
		247	1771.15	247	1757.13	247	1909.1			247	2315.25	247	2264.37								247	83.5895	247	1778.31			247	1310.48	247	1505.63	247	1439.61
		248	1745.24	248	1776.95	248	1900.29			248	2319.02	248	2229.21								248	-0.744529	248	1784.36			248	1311.24	248	1532.86	248	1424.41
		249	1770.3	249	1775.62	249	1977.25			249	2346.9	249	2264.18								249	1104.5	249	1782.1			249	1304.63	249	1497.56	249	1449.03
		250	1751.91	250	1758.99	250	1906.47			250	2316.77	250	2255.04								250	1325.31	250	1785.01			250	1322.12	250	1547.28	250	1421.33
		251	1756.61	251	1758.21	251	1909.26					251	2251.83								251	1407.22	251	1790.71			251	1307.69	251	1515.46	251	1438.59
		252	1781.05	252	1767.9	252	1902.49					252	2251.46								252	1265.33	252	1779.91			252	1304.94	252	1544.2	252	1453.84
		253	1758.8	253	1748.41	253	1896.01					253	2253.61								253	1294.67	253	1805.77			253	1308.89	253	1504.09	253	1426.69
		254	1777.23	254	1755.33	254	1886.88					254	2231.08								254	1346.4	254	1784.46			254	1301.7	254	1513.31	254	1450.45
		255	1745.8	255	1735.39	255	1879.27					255	2222.48								255	1402.82	255	1807.01			255	1296.81	255	1510.87	255	1432.16
		256	1717.82	256	1752.97	256	1872.9					256	2227.33								256	1349.95	256	1790.32					256	1519.67	256	1427.02
		257	1739.27	257	1728.99	257	1895.79					257	2234.14								257	1552.41	257	1791.68					257	1498.38	257	1483.24
		258	1716.94	258	1770.94	258	1877.8					258	2214.36								258	1385.26	258	1784.24					258	1525.07	258	1418.97
		259	1743.53	259	1734.21	259	1870.45					259	2221.91								259	1392.73	259	1800.26					259	1506.89	259	1441.84
		260	1749.51	260	1719.05	260	1879.5					260	2200.58								260	1421.16	260	1790.22					260	1515.91	260	1471
		261	1731.3	261	1727.77	261	1866.55					261	2197.54								261	1411.28	261	1817.27					261	1513.87	261	1432.61
		262	1722.8	262	1742.86	262	1888.56					262	2168								262	1404.93	262	1802.45					262	1511.08	262	1461.28
		263	1716.1	263	1724.41	263	1895.26					263	2212.52								263	1445.92	263	1787.48					263	1505.3	263	1426.16
		264	1718.68	264	1762.43	264	1856.31					264	2180.94								264	1530.6	264	1524.37					264	1517.59	264	1477.17
		265	1701.13	265	1729.11	265	1888.6					265	2201.07								265	1408.93	265	-0.779786					265	1576.95	265	1445.86
		266	1712.73	266	1720.64	266	1871.59					266	2184.68								266	1420.87	266	-0.47107					266	1497.8	266	1435.83
		267	1716.35	267	1738.62	267	1864.74					267	2179.41								267	1423.9	267	1800.8					267	1511.03	267	1416.47
		268	1716.49	268	1748.59	268	1840.66					268	2165.35								268	1416.27	268	1782.53					268	1511.29	268	1533.18
		269	1720.21	269	1698.77	269	1874.67					269	2178.77								269	1414.32	269	1786.76					269	1510.17	269	1458.17
		270	1690.4	270	1720	270	1848.13					270	2169.83								270	1432.15							270	1497.6	270	1426.9
		271	1721.38	271	1714.42	271	1836.83					271	2178.25								271	1457.99							271	1508.12	271	1427.18
		272	1689.58	272	1698.49	272	1834.93					272	2201.82								272	1434.02							272	1523.78	272	1437.54
		273	1687.29	273	1689.81	273	1826.68					273	2151.1								273	1423.16							273	1514	273	1435.02
		274	1722.38	274	1692.37	274	1831.28					274	2163.42								274	1438.5							274	1518.78	274	1454.62
		275	1695.21	275	1695.5	275	1816.49					275	2168.67								275	1427.81							275	1519.54	275	1434.79
		276	1680.78	276	1694.58	276	1837.03					276	2178.93								276	1782.97							276	1500.29	276	1447.41
		277	1696.59	277	1677.64	277	1836.18					277	2150.72								277	1691.81							277	1499.7	277	1482.96
		278	1675.49	278	1711.86	278	1848.23					278	2148.97								278	1631.93							278	1520.72	278	1442.89
		279	1679.73	279	1706.99	279	1809.19					279	2141.41								279	1460.18							279	1507.25	279	1424.79
		280	1705.65	280	1694.24	280	1813.9					280	2174.9								280	1444.08							280	1513.67	280	1450.59
		281	1682.44	281	1678.61	281	1797.44					281	2160.7								281	1443.12							281	1506.33	281	1429.25
		282	1697.72	282	1693.68	282	1799.09					282	2155.33								282	1448.49							282	1517.08	282	1432.33
		283	1688.1	283	1691.23	283	1791.64					283	2160.83								283	1442.98							283	1505.08	283	1438.5
		284	1668.55	284	1701.43	284	1794.42					284	2140.59								284	1476.37							284	1516.03	284	1452.29
		285	1730.87	285	1681.36	285	1804.78					285	2160.01								285	1456.88							285	1517.3	285	1426.46
		286	1659.05	286	1704.3	286	1786.52					286	2131.2								286	1456.43							286	1507.93	286	1434.49
		287	1661.82	287	1697.52	287	1814.23					287	2136.74								287	1449.78							287	1482.25	287	1453.45
		288	1712.01	288	1662.89	288	1806.5					288	2125.58								288	1443.68							288	1588.36	288	1445.33
		289	1663.14	289	1661.39	289	1766.48					289	2120.13								289	1446.16							289	1506.43	289	1416.19
		290	1678.9	290	1665.63	290	1780.87					290	2129.65								290	1458.29							290	1498.64	290	1467.26
		291	1665.08	291	1679.87	291	1756.25					291	2130.65								291	1451							291	1505.03	291	1427.64
				292	1681.29	292	1764.08					292	2109.1								292	1460.37							292	1521.93	292	1451.17
				293	1650.72	293	1759.79					293	2134.88								293	1456.07							293	1497.09	293	1416.01
				294	1673.34	294	1753.78					294	2104.72								294	1443.52							294	1503.02	294	1481.71
				295	1672.86	295	1769.14					295	2153.96								295	1465.37							295	1544.17	295	1478.74
				296	1667.34	296	1759.15					296	2097.53								296	1450.42							296	1508.68	296	1434.47
				297	1648.08	297	1756.93					297	2102.52								297	1455.09							297	1521.47	297	1451.8
				298	1659.25	298	1737.61					298	2084.46								298	1464.29							298	1491.93	298	1429.78
				299	1671.08	299	1747.15					299	2089.24								299	1473.73							299	1501.65	299	1420.1
				300	1666.64	300	1723.72					300	2102.3								300	1453.43							300	1516.7	300	1451.96
